# Supplementary material for: The orchestrated cellular and molecular responses of the kidney to endotoxin define a precise sepsis timeline
Source: eLife. 2021 Jan 15;10:e62270. doi: 10.7554/eLife.62270 (PMC7810465; doi:10.7554/eLife.62270)
Supplement: Supplementary file 1. [file elife-62270-supp1.xlsx]

## Sheet: 0hr_markers
p-value	avg_logFC	pct.1	pct.2	p_val_adj	cluster	gene
0	1.54159	0.998	0.505	0	S1	Gatm
0	1.50244	0.881	0.275	0	S1	Spp2
0	1.45124	0.576	0.136	0	S1	Snhg11
0	1.33359	0.816	0.196	0	S1	Slc5a2
0	1.26609	1	0.987	0	S1	Gpx3
0	1.15728	0.76	0.144	0	S1	Slc5a12
0	1.07699	0.715	0.228	0	S1	Slc6a19
0	1.06834	0.789	0.311	0	S1	Gsta2
0	1.05122	0.94	0.526	0	S1	Maf
0	0.994353	0.637	0.155	0	S1	Clec2h
0	0.98123	0.53	0.046	0	S1	D630023F18Rik
0	0.910693	0.841	0.417	0	S1	Nox4
0	0.868686	0.663	0.204	0	S1	Slc7a7
0	0.864897	0.907	0.563	0	S1	Lgmn
0	0.678167	1	0.995	0	S1	Ftl1
0	0.669692	0.991	0.802	0	S1	Ndrg1
1.45588e-295	0.761201	0.573	0.149	4.07616e-291	S1	Apoe
1.53486e-282	0.79251	0.567	0.155	4.29731e-278	S1	Cyp2d26
1.27789e-281	0.658067	0.365	0.042	3.57784e-277	S1	Slc34a3
3.31814e-272	0.779779	0.878	0.621	9.29014e-268	S1	Comt
3.49165e-265	0.57039	0.987	0.847	9.77592e-261	S1	Pdzk1ip1
2.19526e-262	0.638558	0.984	0.89	6.14629e-258	S1	Mif
1.17155e-258	0.690648	0.994	0.701	3.2801e-254	S1	Ass1
3.21299e-243	0.620069	0.855	0.514	8.99574e-239	S1	Car2
8.26359e-233	1.0616	0.325	0.042	2.31364e-228	S1	Car3
7.73997e-229	0.611975	0.94	0.79	2.16704e-224	S1	Atp6v1g1
7.10462e-225	0.771723	0.535	0.186	1.98915e-220	S1	Slc7a8
1.47282e-223	0.677108	0.856	0.57	4.1236e-219	S1	Dcxr
2.59195e-218	0.676694	0.529	0.175	7.25693e-214	S1	Prodh2
3.45715e-212	0.574064	0.338	0.057	9.67932e-208	S1	Npl
1.32945e-210	0.653513	0.855	0.544	3.72219e-206	S1	Idh1
3.11608e-209	0.698547	0.701	0.36	8.7244e-205	S1	Asl
9.04759e-209	0.665565	0.872	0.554	2.53315e-204	S1	Fut9
9.87063e-208	0.605245	0.88	0.569	2.76358e-203	S1	Dab2
9.36374e-206	0.616795	0.9	0.572	2.62166e-201	S1	Cela1
8.6938e-195	0.655926	0.871	0.553	2.43409e-190	S1	Slc4a4
5.49487e-187	0.599545	0.445	0.136	1.53845e-182	S1	Dpep1
1.85683e-183	0.533654	0.274	0.038	5.19874e-179	S1	Apob
1.81262e-179	0.549558	0.987	0.705	5.07497e-175	S1	Tmem27
1.19364e-177	0.620327	0.464	0.156	3.34195e-173	S1	Cpn1
2.15446e-174	0.542806	0.996	0.751	6.03205e-170	S1	Aldob
2.98264e-172	0.472003	0.995	0.891	8.3508e-168	S1	Akr1a1
3.52487e-172	0.505247	0.362	0.088	9.86894e-168	S1	Cxcl16
2.87026e-167	0.577336	0.574	0.242	8.03615e-163	S1	Acss1
7.19192e-161	0.581635	0.857	0.674	2.01359e-156	S1	Slc25a4
6.47737e-159	0.61272	0.746	0.461	1.81353e-154	S1	Tnfaip8
9.12978e-159	0.562758	0.836	0.587	2.55616e-154	S1	Gm10116
9.25751e-158	0.536182	0.638	0.326	2.59192e-153	S1	Cotl1
6.2915e-152	0.601706	0.547	0.246	1.7615e-147	S1	1700016C15Rik
1.47742e-150	0.556427	0.568	0.265	4.13649e-146	S1	Alpl
2.91119e-149	0.655983	0.597	0.294	8.15074e-145	S1	Car12
2.40515e-148	0.492889	0.922	0.775	6.73394e-144	S1	Pcbd1
2.73106e-148	0.474479	0.267	0.051	7.64643e-144	S1	Sectm1b
1.77475e-145	0.464494	0.997	0.764	4.96893e-141	S1	Miox
3.12054e-144	0.472951	0.986	0.754	8.73689e-140	S1	Slc34a1
4.84806e-141	0.488875	0.918	0.616	1.35736e-136	S1	Fbp1
2.50342e-139	0.532753	0.42	0.154	7.00908e-135	S1	Uap1l1
1.35645e-133	0.527625	0.329	0.095	3.79779e-129	S1	Etv1
1.75229e-130	0.451939	0.878	0.588	4.90606e-126	S1	Pdzk1
2.25285e-127	0.548096	0.512	0.24	6.30753e-123	S1	Steap2
1.8259e-125	0.554128	0.547	0.281	5.11215e-121	S1	Slc3a2
1.23549e-123	0.516816	0.678	0.418	3.45913e-119	S1	Rab11fip3
7.23159e-123	0.420299	0.938	0.72	2.0247e-118	S1	Sord
1.20477e-122	0.472795	0.767	0.507	3.37313e-118	S1	Ethe1
4.89458e-122	0.443574	0.856	0.581	1.37038e-117	S1	Igfbp4
7.92679e-122	0.536241	0.76	0.47	2.21934e-117	S1	G6pc
3.23984e-119	0.472614	0.84	0.577	9.07091e-115	S1	Errfi1
1.34518e-117	0.548229	0.651	0.406	3.76624e-113	S1	Acaa2
3.13466e-115	0.578939	0.329	0.105	8.77643e-111	S1	Cyp24a1
2.35948e-113	0.457016	0.776	0.556	6.60608e-109	S1	Qdpr
1.54149e-112	0.490651	0.562	0.302	4.31587e-108	S1	Smim24
5.25587e-112	0.474527	0.671	0.424	1.47154e-107	S1	Cryl1
1.24118e-109	0.405667	1	0.765	3.47507e-105	S1	Spink1
2.33012e-107	0.391819	0.938	0.803	6.52388e-103	S1	Id2
7.01654e-107	0.394231	0.912	0.621	1.96449e-102	S1	Glyat
1.13269e-105	0.513979	0.516	0.272	3.17129e-101	S1	Slc2a2
1.97846e-105	0.364932	0.544	0.251	5.53931e-101	S1	Fabp3
9.25736e-105	0.470681	0.483	0.24	2.59187e-100	S1	Slc7a9
1.56555e-104	0.385853	0.281	0.084	4.38324e-100	S1	Chrna4
3.76547e-104	0.349988	0.956	0.898	1.05426e-99	S1	Atox1
2.12603e-103	0.51454	0.382	0.151	5.95247e-99	S1	Mdk
3.15084e-103	0.3762	0.279	0.084	8.82173e-99	S1	Lpar3
1.54451e-102	0.39665	0.901	0.618	4.32432e-98	S1	Pah
1.91879e-102	0.479108	0.6	0.348	5.37223e-98	S1	Gm5424
5.79503e-99	0.3778	0.279	0.084	1.62249e-94	S1	Spns3
3.4232e-96	0.324276	0.98	0.905	9.58427e-92	S1	Hint1
6.96952e-96	0.433426	0.726	0.474	1.95133e-91	S1	Abcg2
3.46222e-94	0.271586	0.995	0.976	9.69351e-90	S1	Tpt1
1.22992e-93	0.373762	0.268	0.084	3.44354e-89	S1	Bex4
8.03207e-90	0.344654	0.273	0.089	2.24882e-85	S1	Tfpi2
8.89492e-87	0.424919	0.471	0.252	2.4904e-82	S1	Gnpda1
1.96152e-85	0.368776	0.266	0.09	5.49186e-81	S1	Adap2
2.88921e-84	0.329557	0.98	0.941	8.0892e-80	S1	Gapdh
2.10738e-82	0.370555	0.276	0.098	5.90023e-78	S1	Adap2os
2.31378e-82	0.405579	0.488	0.268	6.47811e-78	S1	Hsd3b2
4.0791e-81	0.371605	0.72	0.485	1.14207e-76	S1	Dao
1.7805e-80	0.365338	0.29	0.111	4.98505e-76	S1	Dpp7
5.33977e-80	0.397267	0.363	0.165	1.49503e-75	S1	Atxn1
1.50686e-79	0.373166	0.418	0.21	4.2189e-75	S1	Tgm2
4.13775e-79	0.431092	0.423	0.219	1.15849e-74	S1	Folh1
2.26728e-78	0.370896	0.32	0.133	6.34793e-74	S1	Renbp
3.08848e-78	0.355844	0.308	0.123	8.64713e-74	S1	Rnf183
2.74309e-76	0.311886	0.955	0.854	7.6801e-72	S1	Park7
2.98785e-76	0.368533	0.268	0.097	8.36539e-72	S1	Rnf186
9.29111e-76	0.381633	0.362	0.171	2.60132e-71	S1	D630045J12Rik
1.69334e-75	0.291396	0.681	0.418	4.74102e-71	S1	Dnase1
2.96998e-75	0.403961	0.495	0.287	8.31535e-71	S1	Amn
9.03883e-75	0.375967	0.345	0.155	2.53069e-70	S1	Acmsd
2.19544e-73	0.355193	0.276	0.108	6.1468e-69	S1	Gldc
2.94825e-73	0.278617	0.273	0.099	8.25452e-69	S1	Tbx2
5.19575e-73	0.407632	0.56	0.361	1.45471e-68	S1	Aldh7a1
1.23819e-72	0.402507	0.47	0.277	3.46668e-68	S1	Slc6a8
1.52284e-72	0.391146	0.488	0.282	4.26366e-68	S1	Kif12
1.74534e-72	0.385464	0.729	0.543	4.8866e-68	S1	Neu1
5.84369e-72	0.361906	0.338	0.155	1.63612e-67	S1	Lyplal1
2.35084e-71	0.37784	0.386	0.195	6.58189e-67	S1	Espn
2.62541e-71	0.388767	0.545	0.342	7.35063e-67	S1	Prodh
7.71787e-71	0.395751	0.412	0.222	2.16085e-66	S1	Setd8
3.22126e-70	0.362951	0.681	0.463	9.01889e-66	S1	Fmo1
5.57841e-70	0.363497	0.394	0.2	1.56184e-65	S1	Fam151a
1.42991e-69	0.367234	0.296	0.126	4.00346e-65	S1	Slc16a1
2.44301e-68	0.278605	0.958	0.856	6.83994e-64	S1	Cd63
2.6369e-68	0.387442	0.631	0.457	7.3828e-64	S1	Atp6v1b2
1.75131e-67	0.294256	0.616	0.38	4.90332e-63	S1	Sepw1
1.24146e-65	0.36263	0.358	0.183	3.47584e-61	S1	Stx3
1.52284e-65	0.390242	0.612	0.423	4.26365e-61	S1	Ascc1
1.98929e-65	0.320332	0.567	0.345	5.56961e-61	S1	Oat
2.60543e-64	0.349907	0.345	0.17	7.2947e-60	S1	Dhfr
4.43976e-64	0.291972	0.856	0.662	1.24304e-59	S1	Akr7a5
1.02266e-63	0.364864	0.37	0.191	2.86324e-59	S1	Tmem106a
1.17996e-63	0.307781	0.785	0.552	3.30365e-59	S1	Folr1
9.55237e-63	0.412305	0.48	0.284	2.67447e-58	S1	Ccnd1
1.3527e-62	0.322414	0.356	0.18	3.78728e-58	S1	Ddc
2.17326e-62	0.362707	0.391	0.21	6.08469e-58	S1	Creg1
4.3829e-62	0.331075	0.715	0.518	1.22712e-57	S1	Sfxn1
5.71609e-61	0.30535	0.721	0.5	1.60039e-56	S1	Gcnt1
3.01672e-59	0.341277	0.665	0.502	8.4462e-55	S1	Nus1
2.5801e-58	0.374059	0.466	0.286	7.22375e-54	S1	Slc43a2
6.11729e-58	0.357675	0.504	0.321	1.71272e-53	S1	Lipa
6.63711e-58	0.297783	0.808	0.604	1.85826e-53	S1	4931406C07Rik
3.94231e-57	0.35934	0.453	0.278	1.10377e-52	S1	Tango2
5.11097e-54	0.308066	0.262	0.116	1.43097e-49	S1	Srcin1
6.12284e-53	0.277845	0.836	0.736	1.71427e-48	S1	Tomm20
8.99537e-53	0.32461	0.368	0.206	2.51852e-48	S1	Aatf
4.62788e-52	0.351865	0.391	0.232	1.29571e-47	S1	Rhobtb1
3.07229e-51	0.261751	0.272	0.125	8.6018e-47	S1	Camk1
2.18085e-50	0.342667	0.522	0.366	6.10595e-46	S1	Tkt
2.56592e-50	0.297094	0.255	0.116	7.18405e-46	S1	Pdp2
8.32898e-50	0.275029	0.922	0.794	2.33195e-45	S1	Timp3
3.66325e-49	0.3408	0.38	0.221	1.02564e-44	S1	Dennd5b
6.56543e-48	0.382289	0.351	0.199	1.83819e-43	S1	Fam13a
8.24324e-48	0.300809	0.573	0.406	2.30794e-43	S1	Pbld2
2.70857e-47	0.283035	0.326	0.174	7.58346e-43	S1	Gm15883
5.18351e-46	0.32111	0.401	0.248	1.45128e-41	S1	Tinag
1.21158e-44	0.301866	0.367	0.216	3.39217e-40	S1	Gcat
4.70448e-44	0.322783	0.362	0.218	1.31716e-39	S1	Tpcn1
4.75749e-44	0.334241	0.558	0.425	1.332e-39	S1	Epn1
1.42481e-43	0.290632	0.285	0.151	3.98917e-39	S1	Habp2
9.9757e-43	0.315201	0.376	0.234	2.793e-38	S1	Ptprd
3.55105e-42	0.297829	0.364	0.218	9.94222e-38	S1	Igsf11
8.61994e-42	0.289751	0.573	0.413	2.41341e-37	S1	Cks2
1.66769e-41	0.28325	0.34	0.198	4.66919e-37	S1	Spsb4
2.20943e-41	0.313752	0.433	0.283	6.18596e-37	S1	Tceal8
1.00429e-40	0.291478	0.549	0.407	2.81182e-36	S1	Ap2a2
1.56216e-40	0.289643	0.412	0.262	4.37373e-36	S1	Slc26a1
2.59154e-40	0.260442	0.754	0.606	7.25579e-36	S1	Sephs2
1.5185e-39	0.303029	0.38	0.241	4.2515e-35	S1	Mpp1
1.52477e-39	0.290723	0.444	0.301	4.26906e-35	S1	Abat
2.09545e-39	0.281415	0.654	0.535	5.86684e-35	S1	2020-03-02
5.46432e-39	0.327587	0.434	0.283	1.5299e-34	S1	Snx29
9.46729e-38	0.259305	0.536	0.382	2.65065e-33	S1	Erich4
1.57223e-37	0.274428	0.528	0.377	4.40193e-33	S1	Enpp2
2.08289e-36	0.257402	0.302	0.172	5.83168e-32	S1	Baiap2
5.16879e-36	0.254827	0.727	0.606	1.44716e-31	S1	Selenbp1
1.56281e-35	0.306696	0.457	0.317	4.37556e-31	S1	Nmrk1
2.62153e-35	0.258549	0.544	0.409	7.33975e-31	S1	Gcsh
1.34163e-33	0.256403	0.474	0.339	3.75629e-29	S1	Cxxc5
3.11853e-33	0.257552	0.391	0.257	8.73126e-29	S1	Car14
3.9815e-33	0.300617	0.406	0.276	1.11474e-28	S1	Mafg
4.13362e-33	0.256509	0.463	0.324	1.15733e-28	S1	Cubn
5.16106e-33	0.264183	0.379	0.251	1.44499e-28	S1	Ppp2r3a
4.38522e-32	0.287583	0.439	0.315	1.22777e-27	S1	Ctsa
4.9354e-32	0.278315	0.762	0.697	1.38181e-27	S1	Rsrp1
8.35674e-32	0.251389	0.413	0.284	2.33972e-27	S1	Prkcz
1.13458e-31	0.250356	0.322	0.2	3.1766e-27	S1	Bid
1.74156e-28	0.252818	0.632	0.536	4.87602e-24	S1	Ctsl
1.91968e-28	0.276517	0.442	0.33	5.37471e-24	S1	Mfsd1
6.69985e-28	0.261016	0.367	0.257	1.87582e-23	S1	Tmem8
7.8099e-28	0.261087	0.495	0.379	2.18661e-23	S1	Acaa1a
1.0123e-26	0.265761	0.297	0.191	2.83424e-22	S1	Col27a1
1.75795e-26	0.251344	0.325	0.21	4.9219e-22	S1	Ccdc141
5.42047e-24	0.278075	0.498	0.396	1.51762e-19	S1	Ank3
4.82199e-22	0.263525	0.337	0.238	1.35006e-17	S1	Slc18a1
3.13931e-20	0.252024	0.524	0.406	8.78943e-16	S1	Slc13a1
3.67252e-18	0.357414	0.932	0.942	1.02823e-13	S1	Malat1
1.69369e-230	0.849684	1	0.801	4.74199e-226	S2	Miox
7.32846e-151	0.667612	0.998	0.747	2.05182e-146	S2	Ass1
1.11536e-137	0.60928	0.989	0.691	3.12277e-133	S2	Guca2b
9.87317e-133	0.602206	0.931	0.62	2.76429e-128	S2	Cela1
5.28739e-130	0.603912	0.995	0.742	1.48036e-125	S2	Akr1c21
2.97598e-120	0.619505	0.722	0.36	8.33214e-116	S2	Slc22a8
3.92766e-116	0.508685	1	0.935	1.09967e-111	S2	Dbi
2.08431e-111	0.49883	0.99	0.762	5.83565e-107	S2	Ttc36
2.21555e-110	0.517039	0.991	0.805	6.2031e-106	S2	Hrsp12
6.42376e-107	0.494756	0.988	0.877	1.79853e-102	S2	Cyb5a
2.74136e-104	0.458888	1	0.946	7.67526e-100	S2	Gpx1
3.44052e-104	0.538591	0.881	0.59	9.63276e-100	S2	Idh1
1.34934e-99	0.492629	0.912	0.566	3.77789e-95	S2	Inmt
4.90648e-97	0.411912	0.972	0.588	1.37372e-92	S2	Gatm
1.76754e-92	0.556972	0.791	0.481	4.94876e-88	S2	RP23-306P12.2
1.7967e-92	0.522486	0.928	0.665	5.03039e-88	S2	Glyat
2.51038e-92	0.495464	1	0.79	7.02856e-88	S2	Aldob
3.94598e-92	0.567651	0.741	0.396	1.10479e-87	S2	Gsta2
2.07529e-91	0.436926	0.995	0.908	5.81041e-87	S2	Akr1a1
6.68734e-89	0.380785	0.933	0.556	1.87232e-84	S2	Cyp4b1
1.3106e-88	0.50477	0.872	0.562	3.6694e-84	S2	Pecr
9.00585e-87	0.44252	0.966	0.751	2.52146e-82	S2	Sord
1.48928e-84	0.486723	0.684	0.352	4.16967e-80	S2	Slc13a3
2.2571e-84	0.433023	0.959	0.698	6.31942e-80	S2	Khk
7.24412e-81	0.520603	0.801	0.543	2.02821e-76	S2	Ethe1
1.80321e-78	0.441947	0.9	0.604	5.04863e-74	S2	Cml1
2.35445e-78	0.361182	0.943	0.617	6.59199e-74	S2	Acy3
4.10963e-78	0.447882	0.907	0.594	1.15061e-73	S2	RP24-64C6.3
3.28738e-76	0.340431	1	0.996	9.20402e-72	S2	Ftl1
4.03617e-75	0.452123	0.953	0.673	1.13005e-70	S2	Keg1
4.01935e-73	0.461096	0.785	0.509	1.12534e-68	S2	Pter
2.78596e-71	0.446713	0.838	0.553	7.80012e-67	S2	Bdh2
1.94866e-67	0.412994	0.882	0.611	5.45587e-63	S2	Calml4
2.56406e-66	0.366828	0.934	0.788	7.17886e-62	S2	Hint2
3.52873e-66	0.295377	1	0.989	9.87975e-62	S2	Gpx3
7.53818e-65	0.444696	0.687	0.384	2.11054e-60	S2	Ces1f
1.37238e-64	0.398959	0.723	0.439	3.84239e-60	S2	Hao2
5.79785e-64	0.308115	0.986	0.916	1.62328e-59	S2	Hint1
1.13206e-63	0.421204	0.777	0.523	3.16954e-59	S2	Gstm5
1.62125e-63	0.397184	0.748	0.445	4.53918e-59	S2	Acaa1b
2.76842e-62	0.395263	0.85	0.579	7.75103e-58	S2	Cda
5.53458e-62	0.452054	0.643	0.382	1.54957e-57	S2	Gm5424
4.73534e-61	0.341371	0.976	0.868	1.3258e-56	S2	Scp2
6.40408e-61	0.468747	0.664	0.403	1.79301e-56	S2	Slc13a1
7.79838e-60	0.410475	0.927	0.663	2.18339e-55	S2	Fbp1
2.44533e-59	0.45556	0.414	0.184	6.84644e-55	S2	Mdk
7.26439e-59	0.308932	0.9	0.573	2.03388e-54	S2	Slc22a12
1.15238e-58	0.451862	0.538	0.284	3.22644e-54	S2	Apom
2.19894e-57	0.351085	1	0.803	6.15659e-53	S2	Spink1
4.75789e-57	0.412212	0.864	0.608	1.33212e-52	S2	Pck1
1.34228e-56	0.284059	0.719	0.391	3.7581e-52	S2	Slc22a6
2.17311e-56	0.371896	0.895	0.665	6.08428e-52	S2	Pah
4.15218e-56	0.269389	0.996	0.961	1.16253e-51	S2	Gpx4
7.52456e-56	0.393957	0.712	0.464	2.10673e-51	S2	BC026585
3.65605e-54	0.38726	0.911	0.699	1.02362e-49	S2	Sult1d1
2.7456e-53	0.481306	0.629	0.385	7.68714e-49	S2	Tmem252
3.71694e-53	0.300739	0.974	0.911	1.04067e-48	S2	Atpif1
1.5766e-51	0.362552	0.835	0.594	4.41418e-47	S2	Dnajc12
1.76427e-51	0.372474	0.784	0.546	4.93959e-47	S2	Msra
1.91969e-51	0.321032	0.959	0.858	5.37474e-47	S2	Hspe1
2.00777e-51	0.32469	0.959	0.75	5.62135e-47	S2	Cyba
3.50245e-51	0.362878	0.935	0.784	9.80617e-47	S2	Hist1h2bc
1.64326e-50	0.380966	0.989	0.948	4.60079e-46	S2	Prdx1
2.59153e-50	0.383256	0.709	0.466	7.25576e-46	S2	Cmbl
7.98539e-50	0.305773	0.968	0.868	2.23575e-45	S2	Park7
7.63753e-49	0.328223	0.89	0.633	2.13835e-44	S2	Pdzk1
1.00868e-48	0.305844	0.986	0.834	2.82411e-44	S2	Ndrg1
9.03727e-46	0.335444	0.984	0.792	2.53026e-41	S2	Slc34a1
3.66676e-45	0.293896	0.535	0.28	1.02662e-40	S2	Slc5a12
3.26884e-44	0.308061	0.884	0.68	9.15209e-40	S2	0610011F06Rik
3.83332e-44	0.325435	0.947	0.83	1.07325e-39	S2	Etfb
8.32e-44	0.324469	0.863	0.619	2.32943e-39	S2	Cyp2j5
3.46251e-43	0.325699	0.905	0.67	9.69433e-39	S2	Lrp2
5.0536e-43	0.35818	0.611	0.388	1.41491e-38	S2	Car4
7.04423e-43	0.348915	0.616	0.394	1.97224e-38	S2	Erich4
4.24528e-42	0.297063	0.849	0.626	1.18859e-37	S2	Igfbp4
4.71707e-42	0.366445	0.687	0.487	1.32069e-37	S2	Dhrs4
5.13941e-42	0.273684	0.821	0.612	1.43893e-37	S2	Cldn10
6.39431e-42	0.308116	0.859	0.629	1.79028e-37	S2	4931406C07Rik
1.0792e-41	0.314569	0.893	0.771	3.02156e-37	S2	4833439L19Rik
1.74809e-41	0.316117	0.279	0.116	4.89431e-37	S2	Spns3
2.5689e-41	0.261403	0.843	0.629	7.19241e-37	S2	Lgmn
7.00809e-41	0.302814	0.87	0.68	1.96212e-36	S2	Msrb1
7.5593e-41	0.325404	0.862	0.693	2.11645e-36	S2	Akr7a5
9.99003e-41	0.312485	0.341	0.164	2.79701e-36	S2	Acnat2
1.555e-40	0.33593	0.331	0.156	4.35368e-36	S2	Tstd1
2.94787e-40	0.256701	0.847	0.608	8.25344e-36	S2	Maf
3.97049e-40	0.306872	0.786	0.59	1.11166e-35	S2	Qdpr
5.10696e-40	0.300025	0.976	0.753	1.42985e-35	S2	Tmem27
6.52728e-40	0.335531	0.555	0.345	1.82751e-35	S2	Fmo2
8.04651e-40	0.293151	0.765	0.51	2.25286e-35	S2	Ugt2b38
9.18447e-40	0.744408	0.389	0.209	2.57147e-35	S2	Ttr
1.51488e-39	0.339308	0.52	0.314	4.24137e-35	S2	Them7
1.84116e-39	0.330813	0.736	0.521	5.15488e-35	S2	Dao
1.13055e-38	0.295399	0.932	0.806	3.16531e-34	S2	Txn1
2.32747e-38	0.336977	0.597	0.383	6.51644e-34	S2	Aspdh
4.34825e-38	0.302181	0.885	0.77	1.21742e-33	S2	Ddt
2.75173e-37	0.269367	0.957	0.879	7.7043e-33	S2	Cisd1
3.45173e-37	0.307989	0.713	0.489	9.66415e-33	S2	Gas2
4.78287e-37	0.252637	0.945	0.823	1.33911e-32	S2	Id2
5.07199e-37	0.410805	0.362	0.187	1.42005e-32	S2	RP23-306P12.3
1.35981e-36	0.298816	0.665	0.449	3.8072e-32	S2	Hnf4a
1.6299e-36	0.320772	0.679	0.461	4.56339e-32	S2	Dnase1
1.83874e-36	0.308365	0.817	0.623	5.1481e-32	S2	Errfi1
5.32301e-36	0.307415	0.51	0.312	1.49034e-31	S2	Haao
1.03052e-35	0.310283	0.626	0.411	2.88525e-31	S2	Aass
4.46169e-35	0.288345	0.71	0.494	1.24918e-30	S2	Fmo1
6.32941e-35	0.324686	0.711	0.535	1.77211e-30	S2	Cryz
1.04749e-34	0.272736	0.438	0.246	2.93277e-30	S2	Prodh2
1.38984e-34	0.255099	0.99	0.946	3.89127e-30	S2	Gapdh
7.14707e-34	0.291291	0.643	0.444	2.00104e-29	S2	Fah
1.51309e-33	0.296871	0.797	0.623	4.23634e-29	S2	Sephs2
4.05994e-33	0.258243	0.776	0.547	1.1367e-28	S2	Gk
6.65542e-33	0.27365	0.835	0.611	1.86338e-28	S2	Fut9
6.9197e-33	0.298958	0.748	0.584	1.93738e-28	S2	Csrp2
1.64923e-32	0.290032	0.452	0.268	4.61752e-28	S2	Fam132a
1.71653e-32	0.256388	0.83	0.627	4.80594e-28	S2	Dab2
1.89159e-32	0.296907	0.448	0.269	5.29607e-28	S2	Car14
2.39542e-32	0.272284	0.765	0.563	6.70671e-28	S2	Lactb2
1.10231e-31	0.361379	0.574	0.395	3.08624e-27	S2	Slc22a28
1.23479e-31	0.268973	0.954	0.939	3.45716e-27	S2	Ybx1
2.24735e-31	0.274684	0.735	0.546	6.29212e-27	S2	Sfxn1
3.70215e-31	0.255249	0.514	0.314	1.03653e-26	S2	Slco1a6
4.36054e-31	0.311128	0.538	0.358	1.22086e-26	S2	Nit2
6.33477e-31	0.259827	0.729	0.5	1.77361e-26	S2	Slc17a1
7.88218e-31	0.280693	0.647	0.434	2.20685e-26	S2	Hykk
1.82721e-30	0.294946	0.618	0.434	5.11582e-26	S2	Tcea3
1.00062e-29	0.280389	0.737	0.571	2.80155e-25	S2	Bphl
1.14424e-29	0.298929	0.581	0.395	3.20365e-25	S2	BC021785
1.21479e-29	0.361009	0.484	0.307	3.40117e-25	S2	G0s2
2.03007e-29	0.280207	0.585	0.391	5.6838e-25	S2	Aldh8a1
3.17598e-28	0.262822	0.695	0.515	8.8921e-24	S2	Tnfaip8
4.97404e-28	0.280954	0.478	0.303	1.39263e-23	S2	Fitm1
5.48839e-28	0.301845	0.514	0.345	1.53664e-23	S2	Sap30
3.34006e-27	0.286313	0.621	0.452	9.35151e-23	S2	Ascc1
4.43203e-27	0.284924	0.463	0.298	1.24088e-22	S2	Tst
5.08853e-27	0.290265	0.536	0.359	1.42469e-22	S2	Aspa
8.63844e-27	0.292132	0.499	0.338	2.41859e-22	S2	Tmem150a
1.90613e-26	0.260465	0.659	0.48	5.33679e-22	S2	Ddah1
2.2458e-26	0.257338	0.841	0.714	6.2878e-22	S2	Nme1
4.36168e-26	0.259991	0.824	0.729	1.22118e-21	S2	Hibadh
5.96413e-26	0.2636	0.827	0.709	1.66984e-21	S2	Esd
8.11903e-26	0.282	0.644	0.477	2.27317e-21	S2	Grhpr
1.14623e-25	0.289676	0.593	0.404	3.2092e-21	S2	Slc22a30
1.35198e-25	0.274985	0.599	0.431	3.78528e-21	S2	Gstz1
2.44399e-25	0.259465	0.728	0.555	6.84267e-21	S2	Iah1
3.60621e-25	0.284328	0.495	0.336	1.00967e-20	S2	Thnsl2
4.1833e-25	0.255531	0.484	0.318	1.17124e-20	S2	Upb1
8.21107e-25	0.254631	0.586	0.416	2.29894e-20	S2	Hgd
1.17982e-24	0.291423	0.526	0.368	3.30326e-20	S2	Macrod2
1.19826e-24	0.251568	0.809	0.678	3.35488e-20	S2	Txndc17
1.79125e-24	0.253782	0.41	0.26	5.01514e-20	S2	Abhd14a
1.84182e-24	0.295791	0.532	0.381	5.15673e-20	S2	Slc25a10
1.23022e-23	0.308225	0.451	0.308	3.44437e-19	S2	Hebp1
1.70218e-23	0.263451	0.46	0.305	4.76577e-19	S2	Gm10804
1.84242e-23	0.261411	0.688	0.52	5.15842e-19	S2	Abcg2
2.05245e-23	0.271663	0.501	0.347	5.74646e-19	S2	Tprkb
5.84968e-23	0.259566	0.654	0.511	1.63779e-18	S2	Smim1
8.34478e-23	0.289613	0.75	0.621	2.33637e-18	S2	Selenbp1
6.94598e-22	0.266306	0.583	0.437	1.94474e-17	S2	Cks2
1.78605e-21	0.264182	0.615	0.479	5.00058e-17	S2	Cisd3
5.64925e-20	0.251864	0.528	0.39	1.58168e-15	S2	Smim22
1.05356e-19	0.259085	0.48	0.338	2.94975e-15	S2	Gstp1
6.1173e-19	0.2526	0.471	0.339	1.71272e-14	S2	Pepd
4.84466e-14	0.281019	0.429	0.319	1.35641e-09	S2	Pde4d
0	2.12432	1	0.848	0	S3	Kap
0	1.78717	0.974	0.407	0	S3	Cndp2
0	1.60655	0.949	0.299	0	S3	Cyp2e1
0	1.58383	0.763	0.08	0	S3	Slc7a13
0	1.48319	0.989	0.465	0	S3	Cyp4b1
0	1.43428	0.995	0.598	0	S3	Slc27a2
0	1.34154	0.99	0.538	0	S3	Acy3
0	1.32492	0.934	0.228	0	S3	Napsa
0	1.30423	0.883	0.262	0	S3	Mep1a
0	1.27503	0.893	0.264	0	S3	Slc22a6
0	1.23858	0.743	0.081	0	S3	Slc5a8
0	1.2304	0.86	0.197	0	S3	Nat8
0	1.2003	0.928	0.397	0	S3	Nudt19
0	1.16503	0.757	0.185	0	S3	Atp11a
0	1.1634	0.973	0.478	0	S3	Inmt
0	1.12838	0.887	0.396	0	S3	Lpl
0	1.12033	0.968	0.486	0	S3	Slc22a12
0	1.07625	0.677	0.074	0	S3	Tmigd1
0	1.0564	0.648	0.074	0	S3	Cd36
0	1.04628	0.93	0.429	0	S3	Ggt1
0	1.03156	0.651	0.069	0	S3	Acsm3
0	1.00883	0.857	0.264	0	S3	Ces1f
0	1.00001	0.915	0.448	0	S3	Ghr
0	0.999283	0.989	0.77	0	S3	Chpt1
0	0.998997	0.464	0.02	0	S3	Slco1a1
0	0.99435	0.906	0.41	0	S3	Ugt2b38
0	0.986776	0.618	0.135	0	S3	Gm11128
0	0.982933	0.84	0.282	0	S3	Slc17a3
0	0.982277	0.921	0.456	0	S3	Ugt3a2
0	0.974074	0.811	0.218	0	S3	Ugt3a1
0	0.96067	0.62	0.076	0	S3	Slc6a18
0	0.945356	0.875	0.341	0	S3	Acaa1b
0	0.923507	0.996	0.717	0	S3	Ttc36
0	0.912619	0.796	0.248	0	S3	Slc13a3
0	0.87785	0.761	0.263	0	S3	Ehhadh
0	0.856052	0.714	0.194	0	S3	Eci3
0	0.850468	0.886	0.399	0	S3	Slc17a1
0	0.81129	0.544	0.114	0	S3	Cyp4a10
0	0.807065	0.995	0.634	0	S3	Guca2b
0	0.803275	0.782	0.311	0	S3	Ldhd
0	0.795358	0.946	0.532	0	S3	Cml1
0	0.787011	0.994	0.854	0	S3	Cyb5a
0	0.7786	0.978	0.612	0	S3	Keg1
0	0.77698	0.942	0.618	0	S3	Msrb1
0	0.776684	0.867	0.47	0	S3	Acox1
0	0.776109	0.936	0.496	0	S3	Cda
0	0.748481	0.995	0.694	0	S3	Acsm2
0	0.740687	0.406	0.029	0	S3	Ugt2b37
0	0.73723	0.945	0.543	0	S3	Cyp2j5
0	0.736843	0.64	0.158	0	S3	D630029K05Rik
0	0.711422	0.999	0.937	0	S3	Gpx1
0	0.706823	0.68	0.204	0	S3	Mpv17l
0	0.601693	0.46	0.071	0	S3	Bhmt2
9.02418e-308	0.77192	0.755	0.283	2.52659e-303	S3	Amacr
2.25133e-303	0.684618	0.99	0.836	6.30327e-299	S3	Sepp1
4.02717e-300	0.728644	0.71	0.25	1.12753e-295	S3	Pank1
5.10251e-292	0.700052	0.945	0.522	1.4286e-287	S3	RP24-64C6.3
9.29024e-290	0.688695	0.669	0.215	2.60108e-285	S3	Ak4
2.14486e-286	0.707079	0.877	0.467	6.00519e-282	S3	Gk
5.54803e-286	0.743067	0.668	0.219	1.55334e-281	S3	Slco1a6
1.38995e-285	0.6821	0.542	0.13	3.89159e-281	S3	Agps
8.17125e-281	0.462924	1	0.999	2.28779e-276	S3	Fth1
2.46435e-279	0.897627	0.749	0.31	6.8997e-275	S3	Slc22a30
1.62065e-271	0.511698	0.376	0.045	4.53748e-267	S3	Slc5a10
4.09837e-271	0.636815	0.568	0.15	1.14746e-266	S3	Serpinf2
1.82459e-270	0.595631	0.513	0.114	5.1085e-266	S3	Slc22a2
7.19987e-269	0.67006	0.755	0.292	2.01582e-264	S3	Car4
2.36695e-267	0.619002	0.498	0.107	6.62699e-263	S3	BC089597
2.37869e-267	0.403892	0.697	0.248	6.65986e-263	S3	Aqp1
4.06017e-264	0.699733	0.627	0.201	1.13677e-259	S3	Cyp4a31
4.43234e-263	0.679532	0.763	0.328	1.24097e-258	S3	Me1
3.41212e-262	0.66972	0.925	0.617	9.55324e-258	S3	Cat
6.29474e-261	0.695511	0.697	0.261	1.7624e-256	S3	Papss2
2.17023e-259	0.714716	0.95	0.61	6.0762e-255	S3	Lrp2
6.30956e-259	0.653092	0.672	0.231	1.76655e-254	S3	Adh1
1.64207e-258	0.506606	0.297	0.021	4.59746e-254	S3	Cyp2d9
1.71866e-256	0.69084	0.833	0.437	4.8119e-252	S3	Gclm
1.07486e-247	0.723261	0.778	0.37	3.0094e-243	S3	Tmem205
3.63067e-247	0.747698	0.912	0.543	1.01651e-242	S3	Pck1
9.52727e-246	0.446253	0.311	0.029	2.66744e-241	S3	Ace
8.26515e-242	0.642569	0.733	0.304	2.31408e-237	S3	BC021785
2.03082e-240	0.638805	0.993	0.769	5.68589e-236	S3	Hrsp12
3.17399e-240	0.457479	0.416	0.072	8.88653e-236	S3	Irx3
1.183e-236	0.575543	0.52	0.136	3.31216e-232	S3	Cyp2j13
2.09389e-236	0.649213	0.744	0.327	5.86248e-232	S3	Aass
3.6498e-236	0.657369	0.906	0.57	1.02187e-231	S3	Tmem176a
7.00274e-230	0.554406	0.47	0.111	1.96063e-225	S3	Ggct
9.02801e-226	0.698588	0.772	0.369	2.52766e-221	S3	Hao2
2.9965e-225	0.434999	0.305	0.034	8.38959e-221	S3	Mogat1
4.73383e-225	0.6046	0.643	0.229	1.32538e-220	S3	Them7
3.44754e-222	0.581553	0.999	0.693	9.65242e-218	S3	Akr1c21
5.21293e-221	0.841679	0.802	0.508	1.45952e-216	S3	Mat2a
8.38562e-221	0.60837	0.569	0.184	2.34781e-216	S3	Csad
2.15357e-216	0.481851	0.259	0.02	6.02957e-212	S3	Gm4208
3.37324e-214	0.573133	0.612	0.218	9.44439e-210	S3	Tnfrsf21
1.25391e-212	0.613358	0.779	0.381	3.51071e-208	S3	Slc47a1
6.65274e-210	0.559018	0.971	0.767	1.86264e-205	S3	Txn1
6.51291e-209	0.469724	0.46	0.114	1.82349e-204	S3	Acot12
2.56396e-208	0.554099	0.965	0.639	7.17857e-204	S3	Sult1d1
5.82729e-207	0.596872	0.734	0.338	1.63152e-202	S3	Lap3
1.06544e-202	0.565072	0.647	0.249	2.98302e-198	S3	Cgref1
6.64784e-201	0.514521	0.998	0.924	1.86126e-196	S3	Dbi
2.25573e-200	0.574214	0.743	0.358	6.31561e-196	S3	Hykk
3.94512e-200	0.460585	0.976	0.874	1.10455e-195	S3	Rps27l
4.86396e-198	0.536497	0.565	0.191	1.36181e-193	S3	Gchfr
1.11345e-197	0.586999	0.83	0.453	3.11743e-193	S3	Kcnj15
2.59948e-193	0.43116	0.275	0.034	7.27802e-189	S3	Hpd
7.10996e-193	0.541231	0.607	0.222	1.99065e-188	S3	Fitm1
1.14086e-192	0.480344	0.451	0.119	3.19418e-188	S3	Aadat
5.03349e-191	0.52666	0.583	0.208	1.40928e-186	S3	Slc3a1
5.30488e-191	0.554936	0.755	0.365	1.48526e-186	S3	Fah
6.36349e-191	0.503995	0.444	0.118	1.78165e-186	S3	Susd2
2.61662e-189	0.465521	0.458	0.125	7.32602e-185	S3	Ugt8a
3.7828e-185	0.538558	0.883	0.605	1.05911e-180	S3	Acadm
5.86608e-185	0.548685	1	0.767	1.64238e-180	S3	Spink1
1.59804e-184	0.550226	0.909	0.643	4.4742e-180	S3	Aldh6a1
3.91712e-184	0.39695	0.998	0.954	1.09671e-179	S3	Gpx4
6.25229e-182	0.594374	0.705	0.312	1.75052e-177	S3	Tmem252
8.00242e-181	0.494877	0.561	0.201	2.24052e-176	S3	Coasy
2.11054e-178	0.377838	0.301	0.05	5.90908e-174	S3	Cckar
3.77159e-178	0.59764	0.444	0.124	1.05597e-173	S3	RP23-306P12.3
4.19033e-176	0.554131	0.768	0.432	1.17321e-171	S3	Hmgcs1
1.88169e-175	0.576243	0.765	0.399	5.26836e-171	S3	Slc22a18
1.06222e-174	0.500076	0.562	0.208	2.97401e-170	S3	Pxmp4
1.68709e-174	0.550267	0.8	0.462	4.72351e-170	S3	Galnt11
5.89941e-174	0.547119	0.812	0.5	1.65172e-169	S3	Sod1
1.74025e-172	0.545089	0.878	0.502	4.87235e-168	S3	Pecr
4.05066e-172	0.51018	0.913	0.676	1.1341e-167	S3	Sat1
2.01308e-171	0.39102	0.288	0.046	5.63622e-167	S3	Gm27216
3.2253e-171	0.501937	0.963	0.648	9.0302e-167	S3	Khk
1.57e-170	0.473451	0.532	0.187	4.39568e-166	S3	Cd302
5.48881e-170	0.380135	0.998	0.967	1.53676e-165	S3	Prdx5
7.47057e-169	0.37862	0.343	0.073	2.09161e-164	S3	Fmo5
1.08842e-168	0.466941	0.476	0.151	3.04737e-164	S3	Proc
1.29937e-165	0.431405	0.369	0.09	3.63797e-161	S3	Adtrp
4.65765e-165	0.45628	0.516	0.176	1.30405e-160	S3	Gm15638
7.43679e-165	0.500714	0.827	0.442	2.08215e-160	S3	Pter
9.17528e-164	0.42458	0.448	0.134	2.5689e-159	S3	AI317395
9.52261e-163	0.431456	0.984	0.844	2.66614e-158	S3	Scp2
3.99421e-160	0.504658	0.672	0.321	1.1183e-155	S3	Ephx2
3.1983e-159	0.506559	0.782	0.462	8.9546e-155	S3	Lypla1
2.28806e-157	0.466914	0.574	0.235	6.40612e-153	S3	Wwp1
5.13776e-156	0.515724	0.866	0.537	1.43847e-151	S3	Dnajc12
4.06424e-155	0.496541	0.823	0.506	1.13791e-150	S3	Fam195a
6.93194e-154	0.436656	0.597	0.243	1.94081e-149	S3	Haao
7.34351e-154	0.483439	0.888	0.583	2.05604e-149	S3	Ccdc107
4.87711e-153	0.612642	0.712	0.37	1.36549e-148	S3	Defb29
4.90286e-152	0.47948	0.68	0.323	1.3727e-147	S3	Sod3
3.00335e-151	0.478702	0.612	0.27	8.40879e-147	S3	Gss
1.53664e-150	0.478011	0.871	0.521	4.30228e-146	S3	Folr1
4.44853e-150	0.477049	0.538	0.216	1.2455e-145	S3	Tmem189
1.07686e-149	0.403986	0.448	0.142	3.01501e-145	S3	Slco3a1
1.72232e-149	0.469261	0.772	0.395	4.82214e-145	S3	BC026585
2.76041e-147	0.49647	0.889	0.627	7.72861e-143	S3	Tmem176b
6.92321e-147	0.339772	0.279	0.053	1.93836e-142	S3	Aacs
1.08586e-146	0.467413	0.757	0.409	3.04019e-142	S3	Ddah1
1.10885e-146	0.489905	0.838	0.502	3.10457e-142	S3	Bphl
1.93585e-146	0.456381	0.507	0.189	5.42001e-142	S3	Mettl7b
1.69758e-145	0.422593	0.974	0.833	4.75287e-141	S3	Hspe1
2.46827e-144	0.454361	0.593	0.257	6.91065e-140	S3	Entpd5
2.14e-143	0.370513	0.334	0.084	5.99156e-139	S3	Paqr7
1.08244e-142	0.405843	0.899	0.608	3.03062e-138	S3	Pth1r
1.1233e-142	0.442288	0.835	0.499	3.145e-138	S3	Lactb2
2.2639e-142	0.434875	0.714	0.356	6.33846e-138	S3	Gstz1
1.12572e-140	0.456188	0.992	0.753	3.1518e-136	S3	Slc34a1
1.1831e-140	0.462906	0.938	0.715	3.31244e-136	S3	Tcn2
4.05633e-139	0.439092	0.679	0.335	1.13569e-134	S3	Aldh9a1
5.8055e-139	0.483373	0.777	0.429	1.62543e-134	S3	RP23-306P12.2
1.17938e-138	0.480478	0.515	0.203	3.30203e-134	S3	Trim7
1.22637e-138	0.461737	0.404	0.131	3.4336e-134	S3	Hsd17b11
1.93403e-138	0.448462	0.905	0.634	5.41489e-134	S3	0610011F06Rik
1.4147e-136	0.463163	0.634	0.309	3.96089e-132	S3	Far1
5.47364e-136	0.357782	0.35	0.095	1.53251e-131	S3	B4galt5
6.00766e-136	0.413183	0.604	0.259	1.68202e-131	S3	Reep5
3.14892e-135	0.455793	0.829	0.523	8.81635e-131	S3	Csrp2
2.59111e-133	0.323865	0.281	0.061	7.25458e-129	S3	Galns
6.51606e-133	0.412448	0.924	0.737	1.82437e-128	S3	4833439L19Rik
4.43665e-132	0.446738	0.559	0.246	1.24217e-127	S3	Crot
1.2872e-130	0.326798	0.353	0.099	3.6039e-126	S3	Afap1l1
4.00853e-130	0.369199	0.365	0.109	1.12231e-125	S3	Rdh16
2.36913e-129	0.315176	0.328	0.085	6.63309e-125	S3	Cndp1
3.34494e-129	0.387586	0.437	0.153	9.36517e-125	S3	Slc51b
2.10703e-128	0.307455	0.284	0.065	5.89926e-124	S3	9030617O03Rik
2.45334e-127	0.402768	0.951	0.819	6.86885e-123	S3	H2afj
1.01265e-126	0.421079	0.555	0.24	2.83523e-122	S3	Abcc2
1.36137e-126	0.3892	0.387	0.123	3.81155e-122	S3	Hsd3b3
1.42093e-125	0.322547	0.301	0.075	3.97832e-121	S3	Vnn1
4.67169e-125	0.40966	0.348	0.103	1.30798e-120	S3	Angptl4
4.94479e-124	0.404943	0.772	0.425	1.38444e-119	S3	Gas2
8.17362e-123	0.403949	0.899	0.554	2.28845e-118	S3	Calml4
1.52207e-122	0.599865	0.831	0.675	4.26148e-118	S3	Zbtb20
2.51458e-122	0.411405	0.884	0.577	7.04032e-118	S3	4931406C07Rik
5.32395e-122	0.302657	0.264	0.059	1.4906e-117	S3	Vps8
9.61629e-122	0.413345	0.804	0.471	2.69237e-117	S3	Gcnt1
1.44422e-120	0.400217	0.517	0.217	4.04353e-116	S3	Npm3
3.07148e-120	0.304719	0.252	0.054	8.59952e-116	S3	Treh
6.25984e-119	0.405381	0.971	0.706	1.75263e-114	S3	Cyba
1.48356e-118	0.255716	0.727	0.411	4.15366e-114	S3	Gstm1
1.78747e-118	0.399369	0.685	0.348	5.00454e-114	S3	Hgd
1.53401e-117	0.39138	0.408	0.145	4.29491e-113	S3	Acot1
5.10947e-117	0.466742	0.535	0.238	1.43055e-112	S3	Apom
1.39643e-116	0.426675	0.81	0.527	3.90973e-112	S3	Grina
1.61511e-116	0.409531	0.615	0.305	4.522e-112	S3	Macrod2
1.83088e-116	0.398746	0.693	0.36	5.12609e-112	S3	Slc22a1
2.75852e-115	0.426457	0.719	0.426	7.72329e-111	S3	Mlec
3.49416e-115	0.40631	0.749	0.426	9.78296e-111	S3	Dhrs4
8.14073e-115	0.384654	0.603	0.291	2.27924e-110	S3	Tmem229a
4.14189e-114	0.411327	0.89	0.687	1.15965e-109	S3	Hibadh
1.35605e-113	0.344551	0.665	0.328	3.79666e-109	S3	Slc22a28
1.58802e-113	0.361053	0.651	0.323	4.44613e-109	S3	Gpr137b
1.95462e-113	0.379789	0.724	0.388	5.47256e-109	S3	Tmem174
3.73921e-113	0.401034	0.47	0.194	1.0469e-108	S3	Cth
5.95117e-113	0.381482	0.51	0.218	1.66621e-108	S3	Slc6a20b
8.49547e-113	0.394233	0.929	0.773	2.37856e-108	S3	Arpp19
2.09774e-112	0.353125	0.428	0.163	5.87325e-108	S3	Paqr9
2.17607e-112	0.42464	0.599	0.291	6.09255e-108	S3	Ces1d
1.01024e-111	0.401932	0.72	0.415	2.82848e-107	S3	Rnf181
1.11946e-111	0.386975	0.595	0.292	3.13427e-107	S3	Nit1
1.34518e-111	0.404497	0.735	0.412	3.76624e-107	S3	Grhpr
1.86799e-111	0.388376	0.714	0.391	5.22999e-107	S3	Hnf4a
3.51781e-111	0.463233	0.491	0.215	9.84917e-107	S3	Acox3
3.3043e-109	0.413303	0.56	0.268	9.25137e-105	S3	Nhp2
2.64632e-108	0.474106	0.804	0.56	7.40918e-104	S3	Odc1
8.03912e-108	0.311488	0.292	0.08	2.25079e-103	S3	Degs2
4.05831e-107	0.336041	0.99	0.706	1.13625e-102	S3	Tmem27
4.66853e-107	0.383269	0.741	0.409	1.3071e-102	S3	Cmbl
8.32407e-107	0.412672	0.362	0.125	2.33057e-102	S3	Osgin1
8.53151e-107	0.3844	0.525	0.239	2.38865e-102	S3	Slc1a1
1.45241e-106	0.379502	0.501	0.221	4.06646e-102	S3	Itgb8
3.2327e-106	0.308559	0.311	0.092	9.05091e-102	S3	Acy1
4.54598e-106	0.35073	0.534	0.24	1.27278e-101	S3	Hoga1
7.45437e-106	0.382214	0.557	0.268	2.08707e-101	S3	Clpx
8.42233e-106	0.381296	0.605	0.307	2.35808e-101	S3	Fam213a
9.51771e-106	0.383166	0.896	0.71	2.66477e-101	S3	Zfp706
1.2469e-105	0.411698	0.807	0.535	3.49108e-101	S3	Med28
1.58028e-105	0.384524	0.398	0.151	4.42446e-101	S3	Fgf1
4.3709e-105	0.408748	0.668	0.359	1.22376e-100	S3	Cldn2
6.16005e-105	0.356079	0.497	0.22	1.72469e-100	S3	Cpox
4.17806e-104	0.3915	0.742	0.444	1.16977e-99	S3	Hpn
4.71353e-104	0.377594	0.81	0.492	1.3197e-99	S3	Msra
6.53555e-104	0.355312	0.92	0.612	1.82982e-99	S3	Pah
1.01471e-103	0.37272	0.508	0.228	2.841e-99	S3	Slc16a2
8.78874e-103	0.35134	0.496	0.217	2.46067e-98	S3	Shmt2
8.92081e-103	0.322553	0.436	0.172	2.49765e-98	S3	Lrrc19
1.36407e-102	0.375213	0.742	0.435	3.81911e-98	S3	Gcdh
2.95727e-102	0.365847	0.833	0.502	8.27978e-98	S3	Bdh2
3.47959e-101	0.352071	0.59	0.29	9.74214e-97	S3	Cideb
6.06749e-101	0.327967	0.363	0.13	1.69878e-96	S3	Slc16a4
9.70825e-101	0.343652	0.491	0.22	2.71812e-96	S3	Osbpl8
2.33135e-100	0.294523	0.327	0.106	6.52732e-96	S3	Susd3
2.88952e-100	0.385292	0.763	0.485	8.09007e-96	S3	Abhd14b
5.6206e-100	0.402886	0.796	0.497	1.57366e-95	S3	Iah1
2.30228e-99	0.368267	0.777	0.478	6.44591e-95	S3	Cryz
8.38727e-99	0.36697	0.581	0.289	2.34827e-94	S3	Sap30
8.88595e-99	0.312564	0.321	0.105	2.48789e-94	S3	Tpmt
1.07447e-98	0.338917	0.647	0.332	3.00831e-94	S3	Aldh8a1
1.35282e-98	0.284141	0.297	0.091	3.78763e-94	S3	Slc16a9
1.94654e-98	0.392089	0.617	0.333	5.44992e-94	S3	Fuca2
1.98308e-98	0.367543	0.645	0.35	5.55223e-94	S3	2310039H08Rik
8.71503e-98	0.359992	0.533	0.251	2.44004e-93	S3	Hebp1
3.36282e-97	0.354602	0.632	0.327	9.41522e-93	S3	Pcx
4.41818e-96	0.334687	0.917	0.641	1.237e-91	S3	Akr7a5
6.53062e-96	0.363736	0.661	0.367	1.82844e-91	S3	Adhfe1
1.81466e-95	0.350966	0.601	0.302	5.08069e-91	S3	Aspa
3.01811e-95	0.372872	0.778	0.494	8.4501e-91	S3	Lrpap1
6.69581e-95	0.348443	0.934	0.823	1.87469e-90	S3	Tmbim6
8.16331e-95	0.314223	0.28	0.085	2.28556e-90	S3	Cyp51
2.59197e-94	0.395772	0.485	0.229	7.257e-90	S3	Trps1
1.24013e-93	0.342742	0.571	0.282	3.47211e-89	S3	Tmem150a
1.29282e-93	0.308468	0.942	0.611	3.61964e-89	S3	Glyat
8.567e-93	0.368225	0.902	0.701	2.39859e-88	S3	Lamp2
5.64402e-92	0.276743	0.296	0.094	1.58021e-87	S3	Slc22a22
9.69978e-92	0.360235	0.573	0.301	2.71574e-87	S3	Nap1l1
1.04069e-91	0.34863	0.757	0.474	2.91374e-87	S3	Snhg18
1.56312e-91	0.262569	0.37	0.138	4.37642e-87	S3	Hexb
3.91948e-91	0.319124	0.409	0.167	1.09738e-86	S3	Ifrd2
6.86544e-91	0.34336	0.53	0.256	1.92219e-86	S3	Fhl1
9.93332e-91	0.337976	0.469	0.214	2.78113e-86	S3	Acss2
4.49573e-90	0.305675	0.999	0.752	1.25872e-85	S3	Aldob
6.01873e-90	0.357798	0.786	0.535	1.68512e-85	S3	Map1lc3a
8.58847e-90	0.30577	0.985	0.895	2.4046e-85	S3	Atpif1
9.1291e-90	0.351079	0.994	0.939	2.55597e-85	S3	Prdx1
1.43687e-89	0.340785	0.625	0.332	4.02294e-85	S3	Aspdh
1.54644e-89	0.363733	0.808	0.563	4.32972e-85	S3	Slc25a39
1.96061e-89	0.296455	0.351	0.131	5.48932e-85	S3	Ar
2.23174e-89	0.324037	0.951	0.751	6.24842e-85	S3	Hist1h2bc
2.89114e-89	0.335229	0.68	0.376	8.0946e-85	S3	Tcea3
9.0331e-89	0.305147	0.387	0.154	2.52909e-84	S3	Smlr1
3.48496e-88	0.360507	0.88	0.64	9.7572e-84	S3	Tmbim4
3.8529e-88	0.339891	0.757	0.474	1.07873e-83	S3	Fuca1
8.74154e-88	0.306227	0.395	0.164	2.44746e-83	S3	Tm7sf3
1.02344e-87	0.367867	0.778	0.53	2.86543e-83	S3	Stard10
1.42182e-87	0.289117	0.94	0.61	3.98081e-83	S3	Fbp1
1.72372e-87	0.325633	0.439	0.194	4.82608e-83	S3	Man1a
5.10839e-87	0.317961	0.383	0.156	1.43025e-82	S3	Rdh10
2.41977e-86	0.313563	0.91	0.578	6.77488e-82	S3	Pdzk1
4.5433e-86	0.318147	0.392	0.162	1.27203e-81	S3	Retsat
1.35657e-85	0.39163	0.504	0.247	3.79812e-81	S3	Mlxipl
1.40504e-85	0.309278	0.542	0.265	3.93384e-81	S3	Upb1
2.69787e-85	0.31539	0.497	0.238	7.55351e-81	S3	Tmem120a
3.57219e-85	0.354254	0.945	0.786	1.00014e-80	S3	Timp3
5.79064e-85	0.305532	0.412	0.178	1.62126e-80	S3	Slc35a3
6.97826e-85	0.26711	0.303	0.103	1.95377e-80	S3	Slc6a13
8.7869e-85	0.327519	0.438	0.196	2.46016e-80	S3	Ppt2
1.55841e-84	0.318615	0.576	0.298	4.36322e-80	S3	Fmo2
2.18077e-84	0.328617	0.576	0.307	6.10573e-80	S3	Osbpl9
1.86519e-83	0.324687	0.581	0.31	5.22216e-79	S3	Tkfc
3.18726e-83	0.299367	0.267	0.085	8.92369e-79	S3	Gm15217
3.39948e-83	0.33073	0.956	0.805	9.51786e-79	S3	Etfb
7.59523e-82	0.315684	0.462	0.216	2.12651e-77	S3	Eci2
6.82423e-81	0.344592	0.493	0.239	1.91065e-76	S3	Tmem37
4.79045e-80	0.313841	0.474	0.228	1.34123e-75	S3	Nceh1
8.81905e-80	0.308806	0.537	0.267	2.46916e-75	S3	Zmynd10
2.82506e-79	0.313505	0.464	0.221	7.9096e-75	S3	Pxmp2
7.52645e-79	0.260294	0.653	0.359	2.10726e-74	S3	Slc13a1
1.0851e-77	0.328481	0.605	0.336	3.03807e-73	S3	Echdc2
2.72381e-77	0.338693	0.851	0.643	7.62612e-73	S3	Smpdl3a
3.40136e-77	0.314563	0.561	0.303	9.52312e-73	S3	Dhcr24
4.35837e-77	0.2788	0.576	0.304	1.22026e-72	S3	Ctsh
9.70024e-77	0.301353	0.451	0.213	2.71587e-72	S3	Por
1.67335e-76	0.344833	0.749	0.489	4.68505e-72	S3	Stra13
2.50967e-76	0.359212	0.569	0.326	7.02656e-72	S3	Smarca2
3.26707e-76	0.302826	0.836	0.576	9.14714e-72	S3	Sephs2
4.21149e-76	0.333827	0.573	0.322	1.17913e-71	S3	Abca3
3.27078e-75	0.289137	0.561	0.296	9.15752e-71	S3	Tprkb
3.42123e-75	0.285912	0.362	0.154	9.57876e-71	S3	Cpt2
4.67162e-75	0.293505	0.424	0.194	1.30796e-70	S3	Adra2b
1.23671e-74	0.257747	0.356	0.148	3.46254e-70	S3	Aldh3a2
1.46183e-74	0.271413	0.392	0.171	4.09285e-70	S3	Stard3nl
3.12698e-74	0.325575	0.609	0.353	8.75492e-70	S3	Acads
5.49168e-74	0.277692	0.503	0.253	1.53756e-69	S3	Eps8
7.04755e-74	0.323925	0.485	0.247	1.97317e-69	S3	Decr1
7.64165e-74	0.2946	0.865	0.631	2.13951e-69	S3	Dnajc19
9.17732e-74	0.258786	0.311	0.118	2.56947e-69	S3	Idi1
1.69776e-72	0.28067	0.938	0.812	4.75339e-68	S3	Mrps21
1.83936e-72	0.264456	0.955	0.715	5.14983e-68	S3	Sord
3.28923e-72	0.3178	0.599	0.345	9.20919e-68	S3	Sardh
3.78001e-72	0.357632	0.843	0.616	1.05833e-67	S3	Acat1
4.8629e-71	0.327331	0.702	0.446	1.36151e-66	S3	Psma4
3.13366e-69	0.267229	0.547	0.287	8.77362e-65	S3	Thnsl2
5.86065e-69	0.283903	0.396	0.182	1.64087e-64	S3	Kcnk5
8.14575e-69	0.263481	0.971	0.891	2.28065e-64	S3	Mpc1
9.32747e-69	0.347184	0.82	0.609	2.6115e-64	S3	Ech1
2.44804e-68	0.314799	0.634	0.372	6.85403e-64	S3	Gstt2
4.28807e-68	0.275754	0.601	0.337	1.20057e-63	S3	Xylb
5.67358e-68	0.302602	0.593	0.351	1.58849e-63	S3	Lrrc58
7.62615e-68	0.273442	0.911	0.772	2.13517e-63	S3	Vamp8
1.53671e-67	0.304406	0.42	0.204	4.30248e-63	S3	Acsm1
3.51642e-67	0.278074	0.442	0.218	9.84527e-63	S3	Sgpp1
8.63047e-67	0.255161	0.765	0.47	2.41636e-62	S3	Dao
8.99267e-67	0.314951	0.651	0.417	2.51777e-62	S3	Thoc7
1.71687e-66	0.308523	0.569	0.329	4.8069e-62	S3	Ivd
3.48989e-65	0.251341	0.972	0.858	9.77099e-61	S3	Cisd1
1.72641e-64	0.296525	0.798	0.576	4.8336e-60	S3	Hspd1
3.62104e-64	0.287016	0.658	0.42	1.01382e-59	S3	Sqstm1
4.04142e-64	0.256961	0.586	0.333	1.13152e-59	S3	Slc25a10
8.70853e-64	0.284061	0.561	0.324	2.43822e-59	S3	Col4a3
9.09553e-64	0.304755	0.684	0.456	2.54657e-59	S3	Abcd3
8.22854e-63	0.254269	0.413	0.203	2.30383e-58	S3	Cmtm6
3.66649e-62	0.278918	0.537	0.297	1.02654e-57	S3	Cubn
1.48532e-61	0.263249	0.411	0.205	4.15859e-57	S3	Glyctk
9.63217e-61	0.291002	0.548	0.318	2.69681e-56	S3	Coa6
2.25578e-60	0.270514	0.552	0.322	6.31573e-56	S3	Gpd1
8.36658e-60	0.295365	0.672	0.445	2.34248e-55	S3	Hspa5
1.26049e-59	0.285926	0.52	0.292	3.52913e-55	S3	Acadl
3.57432e-59	0.27984	0.64	0.396	1.00074e-54	S3	Mettl7a1
3.72111e-59	0.261889	0.755	0.504	1.04184e-54	S3	Sfxn1
3.77407e-59	0.264988	0.448	0.235	1.05666e-54	S3	Wdr18
3.89686e-59	0.251128	0.72	0.45	1.09104e-54	S3	Fmo1
5.80803e-59	0.28671	0.48	0.261	1.62613e-54	S3	Tst
6.24142e-59	0.279162	0.539	0.314	1.74747e-54	S3	Chuk
9.98833e-59	0.278692	0.673	0.436	2.79653e-54	S3	C1d
1.1284e-58	0.280214	0.907	0.773	3.1593e-54	S3	Iscu
1.71737e-58	0.273318	0.657	0.414	4.80829e-54	S3	Gm2a
3.19766e-58	0.263763	0.892	0.746	8.9528e-54	S3	Ost4
6.38944e-58	0.266953	0.709	0.464	1.78892e-53	S3	Smim1
4.58235e-57	0.271251	0.815	0.606	1.28297e-52	S3	Mien1
1.41083e-56	0.268663	0.717	0.486	3.95005e-52	S3	Rer1
1.70782e-53	0.265571	0.819	0.586	4.78154e-49	S3	Errfi1
2.79654e-52	0.26518	0.732	0.482	7.82976e-48	S3	G6pc
1.16382e-50	0.273594	0.447	0.25	3.25846e-46	S3	Nfia
3.4863e-50	0.275993	0.743	0.533	9.76093e-46	S3	Usp50
5.3463e-45	0.316787	0.469	0.28	1.49686e-40	S3	G0s2
1.04563e-37	0.432826	0.614	0.445	2.92756e-33	S3	Dnase1
0	1.60703	0.717	0.007	0	S3T2	Cyp7b1
0	1.59673	0.698	0.003	0	S3T2	Serpina1d
0	1.40335	0.774	0.002	0	S3T2	Serpina1f
0	1.33292	0.774	0.01	0	S3T2	Mettl7a2
0	1.03639	0.434	0.001	0	S3T2	Bcat1
0	0.965424	0.547	0.007	0	S3T2	Slc22a13
0	0.828628	0.34	0.001	0	S3T2	Akr1c18
7.329e-292	1.21199	0.717	0.014	2.05197e-287	S3T2	Scd1
1.1126e-283	0.98072	0.547	0.008	3.11505e-279	S3T2	Slc22a19
2.54117e-271	0.677267	0.396	0.004	7.11476e-267	S3T2	Slco4c1
2.65134e-270	0.87052	0.377	0.003	7.42323e-266	S3T2	Serpina1a
8.31922e-249	1.50938	0.774	0.022	2.32921e-244	S3T2	Slc22a7
4.40921e-239	1.1991	0.736	0.02	1.23449e-234	S3T2	Mep1b
7.43488e-110	1.46498	0.679	0.042	2.08162e-105	S3T2	Apoc3
1.79287e-109	1.11923	0.774	0.056	5.01967e-105	S3T2	Akr1c14
1.97431e-97	0.706114	0.415	0.017	5.52766e-93	S3T2	Myo5a
8.61358e-89	0.427066	0.264	0.007	2.41163e-84	S3T2	Itih5
2.12874e-82	1.29321	0.585	0.041	5.96005e-78	S3T2	Hsd11b1
4.4359e-71	0.481689	0.34	0.015	1.24196e-66	S3T2	Irx1
2.02144e-69	1.3187	0.906	0.132	5.65961e-65	S3T2	Cyp51
2.74221e-65	1.22981	0.698	0.076	7.67763e-61	S3T2	Cyp2a4
3.6113e-65	0.473408	0.321	0.015	1.01109e-60	S3T2	Csf1r
7.77501e-64	0.390493	0.302	0.013	2.17685e-59	S3T2	Gm15348
3.45782e-58	1.11025	0.774	0.107	9.68121e-54	S3T2	Gpm6a
1.50919e-56	1.72394	0.755	0.108	4.22543e-52	S3T2	Cryab
1.06362e-54	0.403828	0.302	0.016	2.97793e-50	S3T2	Apobec2
2.61414e-50	0.98335	0.774	0.12	7.31908e-46	S3T2	Bdh1
4.06885e-48	0.46811	0.377	0.029	1.1392e-43	S3T2	Frzb
6.0446e-47	1.4761	0.962	0.233	1.69237e-42	S3T2	Tmigd1
1.58096e-45	1.68193	0.906	0.223	4.42638e-41	S3T2	Acsm3
6.39747e-44	1.70268	0.981	0.329	1.79116e-39	S3T2	Mpv17l
1.29511e-41	1.56078	0.849	0.205	3.62606e-37	S3T2	Aadat
8.78231e-39	1.42455	0.962	0.261	2.45887e-34	S3T2	Slc7a13
5.50729e-38	2.33968	0.962	0.417	1.54193e-33	S3T2	Napsa
1.35521e-37	1.56787	0.943	0.327	3.79431e-33	S3T2	Crot
5.66735e-37	0.753457	0.585	0.087	1.58674e-32	S3T2	Ppic
2.69929e-36	0.835059	0.679	0.12	7.55746e-32	S3T2	Mme
7.12092e-35	0.625494	0.34	0.032	1.99371e-30	S3T2	Rnf24
6.45583e-33	1.53207	0.981	0.572	1.8075e-28	S3T2	Ghr
4.31361e-32	0.8527	0.585	0.1	1.20772e-27	S3T2	Apob
1.97196e-31	0.826805	0.585	0.102	5.5211e-27	S3T2	Ace
7.13881e-31	1.05127	0.849	0.226	1.99872e-26	S3T2	Cd36
7.7063e-30	0.471367	0.34	0.037	2.15761e-25	S3T2	Slc39a8
1.24316e-29	1.61308	0.925	0.428	3.4806e-25	S3T2	Mep1a
1.40849e-29	0.814286	0.472	0.068	3.94348e-25	S3T2	Kcnk1
2.28644e-28	1.35308	0.962	0.46	6.40159e-24	S3T2	Defb29
6.47836e-28	1.02921	0.887	0.284	1.81381e-23	S3T2	Csad
8.98039e-28	0.744997	0.585	0.118	2.51433e-23	S3T2	Galns
1.37711e-27	0.848302	0.528	0.093	3.85563e-23	S3T2	Cyp2d9
3.07602e-27	1.23495	0.943	0.494	8.61224e-23	S3T2	Gstm1
7.72224e-27	0.41088	0.358	0.044	2.16207e-22	S3T2	Aqp7
1.24711e-26	0.840306	0.717	0.181	3.49165e-22	S3T2	Slc23a1
2.85176e-26	0.620898	0.528	0.094	7.98436e-22	S3T2	Slc10a2
4.03072e-26	1.1186	0.755	0.221	1.12852e-21	S3T2	Slc6a18
7.95843e-26	1.08772	0.925	0.376	2.2282e-21	S3T2	Ugt3a1
8.11392e-26	0.962087	0.849	0.257	2.27173e-21	S3T2	Slc5a8
5.92961e-25	1.0719	0.887	0.367	1.66017e-20	S3T2	Aqp1
8.45797e-25	1.32828	0.962	0.679	2.36806e-20	S3T2	Acadm
1.03503e-24	0.864005	0.811	0.227	2.89788e-20	S3T2	Cyp4a10
1.68682e-24	1.07382	0.906	0.371	4.72275e-20	S3T2	Pank1
9.49802e-24	1.55602	1	0.889	2.65926e-19	S3T2	Kap
3.71728e-23	0.383362	0.321	0.041	1.04077e-18	S3T2	Bok
4.44014e-23	0.875237	0.755	0.221	1.24315e-18	S3T2	Cdo1
7.61984e-23	1.10744	0.981	0.704	2.1334e-18	S3T2	Slc27a2
8.2131e-23	0.431484	0.264	0.03	2.2995e-18	S3T2	Agt
9.54179e-23	1.235	0.868	0.337	2.67151e-18	S3T2	Atp11a
1.2624e-22	1.2498	0.792	0.309	3.53446e-18	S3T2	Gclc
1.67931e-22	0.693059	0.472	0.09	4.70172e-18	S3T2	Nt5e
2.65006e-22	0.939103	1	0.829	7.41964e-18	S3T2	Chpt1
4.00609e-22	0.549173	0.321	0.043	1.12163e-17	S3T2	Tspan13
8.58142e-22	0.55878	0.528	0.109	2.40263e-17	S3T2	Gm27216
4.55595e-21	0.72455	0.811	0.265	1.27557e-16	S3T2	Cth
7.28912e-20	0.705581	0.472	0.101	2.04081e-15	S3T2	C1qtnf3
1.02223e-19	0.666806	0.585	0.147	2.86203e-15	S3T2	Gltp
1.47167e-19	0.988396	0.962	0.542	4.12039e-15	S3T2	Gclm
2.70026e-19	0.439135	0.321	0.048	7.56019e-15	S3T2	Fam107a
2.9961e-19	1.02978	0.943	0.539	8.38849e-15	S3T2	Nudt19
3.33904e-19	0.816395	0.774	0.289	9.34865e-15	S3T2	Gchfr
4.48652e-19	0.495322	0.321	0.049	1.25614e-14	S3T2	Hmgcr
4.53827e-19	0.764728	0.566	0.151	1.27063e-14	S3T2	Slc9a8
5.23075e-19	0.773836	0.868	0.306	1.46451e-14	S3T2	Slc3a1
1.92627e-18	0.823595	0.83	0.345	5.39316e-14	S3T2	Entpd5
3.35783e-18	0.984499	1	0.659	9.40124e-14	S3T2	Acy3
3.90588e-18	0.531435	0.434	0.088	1.09357e-13	S3T2	Acox2
1.00759e-17	0.629462	0.528	0.132	2.82104e-13	S3T2	Slc5a10
1.27858e-17	0.526681	0.472	0.107	3.57976e-13	S3T2	Gramd1b
1.3025e-17	1.08591	0.906	0.482	3.64675e-13	S3T2	S100a11
1.32336e-17	0.670099	1	0.966	3.70515e-13	S3T2	Gpx4
2.77294e-17	0.824093	0.774	0.291	7.76369e-13	S3T2	Nceh1
7.18748e-17	0.815094	0.981	0.77	2.01235e-12	S3T2	Psap
3.59003e-16	0.628209	0.547	0.154	1.00514e-11	S3T2	Slc6a13
5.54957e-16	0.630038	0.623	0.179	1.55377e-11	S3T2	Ugdh
6.54707e-16	0.453229	0.377	0.077	1.83305e-11	S3T2	BC035947
7.51631e-16	0.810391	0.906	0.576	2.10442e-11	S3T2	Gk
1.22256e-15	0.568034	0.396	0.088	3.42292e-11	S3T2	Lipo1
2.24891e-15	0.844076	0.792	0.396	6.29649e-11	S3T2	Ehhadh
2.44653e-15	0.661957	0.528	0.146	6.84979e-11	S3T2	Abhd2
3.024e-15	0.661084	0.509	0.145	8.4666e-11	S3T2	Slc16a9
4.61061e-15	0.350089	0.358	0.072	1.29088e-10	S3T2	3110045C21Rik
5.12774e-15	0.561567	0.321	0.062	1.43567e-10	S3T2	Gm853
6.11086e-15	0.805377	0.943	0.646	1.71092e-10	S3T2	Calml4
1.2539e-14	0.728139	0.887	0.546	3.51066e-10	S3T2	Lypla1
1.2603e-14	0.714183	0.623	0.215	3.5286e-10	S3T2	Fgf1
1.61186e-14	0.759068	0.981	0.73	4.51289e-10	S3T2	Guca2b
2.11669e-14	1.04318	0.566	0.191	5.9263e-10	S3T2	Macrod1
2.33827e-14	0.712653	0.943	0.562	6.54669e-10	S3T2	Ggt1
3.75196e-14	0.675085	0.868	0.437	1.05047e-09	S3T2	Ldhd
5.69905e-14	0.38051	0.434	0.106	1.59562e-09	S3T2	Treh
6.07604e-14	0.685026	0.717	0.286	1.70117e-09	S3T2	D630029K05Rik
7.90427e-14	0.693361	0.774	0.344	2.21304e-09	S3T2	Nhp2
1.2615e-13	0.452728	0.453	0.118	3.53196e-09	S3T2	2200002D01Rik
3.53995e-13	0.525929	0.509	0.15	9.91116e-09	S3T2	Slc15a2
4.38788e-13	0.486756	0.302	0.062	1.22852e-08	S3T2	Tyw3
1.15401e-12	0.641827	0.811	0.408	3.23101e-08	S3T2	Fuca2
1.60335e-12	0.582285	0.642	0.24	4.48906e-08	S3T2	Agps
1.68817e-12	0.625168	0.509	0.168	4.72654e-08	S3T2	Idi1
1.79516e-12	0.674621	0.943	0.58	5.02608e-08	S3T2	Ugt3a2
2.03334e-12	0.465531	0.547	0.179	5.69294e-08	S3T2	Lpgat1
4.47847e-12	0.360365	0.434	0.118	1.25388e-07	S3T2	Casc4
5.5642e-12	0.444087	1	0.999	1.55786e-07	S3T2	Fth1
6.70302e-12	0.536937	0.981	0.999	1.87671e-07	S3T2	mt-Nd1
6.82425e-12	0.552636	0.585	0.216	1.91065e-07	S3T2	Cbs
7.25673e-12	0.633708	1	0.792	2.03174e-07	S3T2	Ttc36
1.0506e-11	0.677524	0.811	0.443	2.94146e-07	S3T2	Lap3
1.43657e-11	0.705567	0.83	0.521	4.02212e-07	S3T2	Hmgcs1
1.5276e-11	0.667451	0.717	0.314	4.27696e-07	S3T2	Cyp4a31
2.01886e-11	0.592549	1	0.65	5.6524e-07	S3T2	Cyp2j5
2.11705e-11	0.697446	0.736	0.36	5.92733e-07	S3T2	Gss
2.94646e-11	0.552009	0.774	0.35	8.2495e-07	S3T2	Reep5
6.40062e-11	0.579659	0.925	0.544	1.79204e-06	S3T2	Pter
7.03191e-11	0.514199	0.321	0.079	1.96879e-06	S3T2	Sqle
8.17648e-11	0.502782	1	0.882	2.28925e-06	S3T2	Scp2
9.02568e-11	0.557468	0.566	0.214	2.52701e-06	S3T2	Acot1
9.29423e-11	0.742887	0.868	0.559	2.6022e-06	S3T2	Gcnt1
1.25367e-10	0.660752	0.943	0.676	3.51003e-06	S3T2	Acat1
1.30427e-10	0.63808	0.83	0.583	3.65169e-06	S3T2	Sod1
1.57656e-10	0.297317	0.358	0.09	4.41405e-06	S3T2	Pla2g16
1.88938e-10	0.485436	0.906	0.431	5.2899e-06	S3T2	Slc17a3
2.01438e-10	0.447335	0.491	0.164	5.63986e-06	S3T2	Adtrp
2.28565e-10	0.5764	0.642	0.291	6.39936e-06	S3T2	Osbpl8
3.20531e-10	0.491786	0.472	0.158	8.97422e-06	S3T2	Mtor
3.89129e-10	0.32537	0.453	0.139	1.08948e-05	S3T2	Phlda2
5.34526e-10	0.361549	0.264	0.057	1.49656e-05	S3T2	Uroc1
5.36636e-10	0.413553	0.509	0.175	1.50247e-05	S3T2	Bhmt2
7.1449e-10	0.533107	1	0.853	2.00043e-05	S3T2	H2afj
7.51822e-10	0.415187	0.377	0.111	2.10495e-05	S3T2	Cers6
1.50019e-09	0.58345	0.717	0.395	4.20024e-05	S3T2	Far1
1.50393e-09	0.550221	0.981	0.852	4.2107e-05	S3T2	Tmbim6
1.76899e-09	0.265924	0.321	0.084	4.95281e-05	S3T2	Cyb561
1.86159e-09	0.424359	0.566	0.22	5.21207e-05	S3T2	Slc22a2
1.90253e-09	0.461119	1	0.99	5.32669e-05	S3T2	mt-Nd2
2.19277e-09	0.363908	1	0.979	6.13931e-05	S3T2	Rpl35a
3.22063e-09	0.385403	0.472	0.161	9.01712e-05	S3T2	Tpmt
3.35006e-09	0.348337	0.358	0.106	9.37948e-05	S3T2	Mogat1
3.67422e-09	0.579703	0.887	0.543	0.000102871	S3T2	Glul
4.25914e-09	0.342318	0.377	0.117	0.000119247	S3T2	Med14
4.55983e-09	0.430278	0.736	0.336	0.000127666	S3T2	Haao
5.78903e-09	0.386942	0.981	0.901	0.000162081	S3T2	Rps27l
6.70774e-09	0.481645	1	0.944	0.000187803	S3T2	Dbi
7.43478e-09	0.507324	0.943	0.66	0.000208159	S3T2	Tmem176a
9.36006e-09	0.463551	0.642	0.301	0.000262063	S3T2	Tmem189
9.60265e-09	0.306832	0.34	0.098	0.000268855	S3T2	Dio1
1.03678e-08	0.535447	0.604	0.273	0.000290279	S3T2	Trap1
1.12884e-08	0.310656	0.321	0.09	0.000316053	S3T2	Nrtn
1.21712e-08	0.395365	0.774	0.401	0.000340769	S3T2	S100a10
1.35769e-08	0.451856	0.396	0.133	0.000380126	S3T2	Gm15217
1.4512e-08	0.453807	0.679	0.314	0.000406307	S3T2	Slc1a1
1.65032e-08	0.531609	0.604	0.273	0.000462055	S3T2	Mettl7b
1.749e-08	0.381158	1	0.982	0.000489685	S3T2	Ndufa4
2.20336e-08	0.308523	0.264	0.068	0.000616897	S3T2	Plau
2.47248e-08	0.562146	0.736	0.407	0.000692246	S3T2	Bnip3l
2.67776e-08	0.390837	0.623	0.263	0.000749719	S3T2	Slc33a1
3.30458e-08	0.525659	0.962	0.635	0.000925216	S3T2	RP24-64C6.3
3.46654e-08	0.350726	0.453	0.164	0.000970562	S3T2	Ndufaf2
3.57563e-08	0.497695	1	0.726	0.00100111	S3T2	Sult1d1
5.41392e-08	0.376701	0.415	0.145	0.00151579	S3T2	Cyp2j11
5.70955e-08	0.505644	0.849	0.537	0.00159856	S3T2	1810037I17Rik
6.97132e-08	0.256255	0.264	0.07	0.00195183	S3T2	Ccbl2
7.76161e-08	0.335317	0.547	0.217	0.00217309	S3T2	AI317395
9.65954e-08	0.487686	0.585	0.281	0.00270448	S3T2	Itfg1
1.01924e-07	0.544109	0.585	0.288	0.00285366	S3T2	Hist1h1c
1.21885e-07	0.501904	0.66	0.336	0.00341253	S3T2	Ak4
1.22277e-07	0.395148	0.981	0.997	0.0034235	S3T2	mt-Co2
1.27452e-07	0.443763	0.868	0.527	0.00356839	S3T2	Lpl
1.27663e-07	0.369725	0.604	0.26	0.00357432	S3T2	Acyp2
1.43195e-07	0.379161	0.623	0.281	0.00400917	S3T2	Acss2
1.53007e-07	0.692019	0.736	0.476	0.0042839	S3T2	Slc6a6
1.54468e-07	0.31059	1	0.996	0.0043248	S3T2	Rpl41
1.63959e-07	0.44031	0.509	0.206	0.00459052	S3T2	Acot12
1.67717e-07	0.495491	0.396	0.145	0.00469575	S3T2	Fmo5
1.75079e-07	0.399843	0.34	0.113	0.00490185	S3T2	Tmco3
1.75991e-07	0.46635	0.415	0.15	0.00492739	S3T2	Acy1
1.8638e-07	0.408473	0.264	0.074	0.00521827	S3T2	Vwa1
1.88e-07	0.406501	0.623	0.302	0.00526363	S3T2	9530068E07Rik
1.96209e-07	0.441562	0.547	0.237	0.00549345	S3T2	Proc
2.01524e-07	0.373597	0.83	0.444	0.00564226	S3T2	Adhfe1
2.13046e-07	0.464318	0.642	0.325	0.00596486	S3T2	Wwp1
2.83603e-07	0.375859	1	1	0.00794031	S3T2	mt-Atp6
2.94317e-07	0.43787	0.868	0.549	0.00824029	S3T2	Snhg18
3.04376e-07	0.438428	1	0.898	0.00852192	S3T2	Ndufb8
3.1192e-07	0.351467	0.472	0.188	0.00873313	S3T2	Tmem243
3.52133e-07	0.513904	0.566	0.282	0.00985902	S3T2	Gls
3.59326e-07	0.39486	0.377	0.141	0.0100604	S3T2	Hist1h4h
3.88739e-07	0.513717	0.906	0.607	0.0108839	S3T2	Med28
4.16423e-07	0.354746	0.585	0.261	0.011659	S3T2	Serpinf2
4.26741e-07	0.40234	0.472	0.191	0.0119479	S3T2	Slc16a4
6.24329e-07	0.393232	0.887	0.528	0.01748	S3T2	Smim1
6.59022e-07	0.492657	0.623	0.333	0.0184513	S3T2	Ccng1
7.50374e-07	0.395161	0.792	0.478	0.021009	S3T2	Gm2a
8.46689e-07	0.330833	0.415	0.157	0.0237056	S3T2	Asah1
1.00466e-06	0.463701	0.736	0.418	0.0281285	S3T2	Sod3
1.04825e-06	0.366801	0.774	0.432	0.0293488	S3T2	Aplp2
1.13798e-06	0.4788	0.906	0.592	0.0318612	S3T2	Bphl
1.15361e-06	0.340367	0.717	0.386	0.0322988	S3T2	Fam213a
1.15802e-06	0.385532	0.981	0.917	0.0324222	S3T2	Mpc2
1.17673e-06	0.358359	0.472	0.201	0.0329461	S3T2	Tpk1
1.2135e-06	0.300121	0.396	0.151	0.0339757	S3T2	Ahcy
1.35655e-06	0.288495	0.377	0.138	0.0379808	S3T2	Tmem178
1.56407e-06	0.312809	0.509	0.225	0.0437907	S3T2	Ap3s1
1.68038e-06	0.34334	0.415	0.166	0.0470474	S3T2	Afap1l1
1.71865e-06	0.304113	1	0.976	0.0481188	S3T2	Prdx5
1.78031e-06	0.448785	0.849	0.569	0.0498452	S3T2	Lrpap1
1.87057e-06	0.410225	0.925	0.814	0.0523723	S3T2	Arpp19
1.94348e-06	0.342728	0.472	0.199	0.0544136	S3T2	Hexb
2.47539e-06	0.308491	1	1	0.0693058	S3T2	mt-Co1
2.68929e-06	0.346751	0.604	0.297	0.0752948	S3T2	Nfs1
3.19646e-06	0.310378	1	0.997	0.0894944	S3T2	mt-Nd4
3.92492e-06	0.347239	1	0.976	0.10989	S3T2	Gm10076
4.34605e-06	0.384631	0.66	0.36	0.121681	S3T2	Cubn
4.68338e-06	0.315429	0.585	0.277	0.131125	S3T2	Slc25a17
5.00445e-06	0.342364	0.981	0.936	0.140115	S3T2	mt-Nd5
5.08296e-06	0.310962	0.585	0.282	0.142313	S3T2	Cdhr5
5.28934e-06	0.340931	1	0.893	0.148091	S3T2	Ndufv3
5.46082e-06	0.3251	1	0.891	0.152892	S3T2	Cyb5a
6.27037e-06	0.415085	0.472	0.228	0.175558	S3T2	Znrf2
6.2779e-06	0.379194	0.491	0.233	0.175769	S3T2	Galnt1
6.30169e-06	0.301364	0.472	0.209	0.176435	S3T2	Ankib1
9.00068e-06	0.350269	0.83	0.524	0.252001	S3T2	Lsm4
9.21533e-06	0.384449	0.642	0.333	0.258011	S3T2	Eci3
9.60561e-06	0.478029	0.679	0.41	0.268938	S3T2	Amacr
1.12048e-05	0.379193	0.453	0.216	0.313711	S3T2	Tmem19
1.16025e-05	0.300722	0.792	0.46	0.324847	S3T2	Mettl7a1
1.17875e-05	0.26144	0.264	0.09	0.330027	S3T2	Htatip2
1.3993e-05	0.369136	0.491	0.247	0.391776	S3T2	Rbbp4
1.63828e-05	0.352027	1	0.804	0.458685	S3T2	Hist1h2bc
1.64649e-05	0.306031	0.962	0.822	0.460985	S3T2	Txn1
1.65561e-05	0.278308	0.283	0.104	0.463537	S3T2	Shoc2
1.78789e-05	0.413729	0.943	0.699	0.500575	S3T2	Cat
1.83986e-05	0.351812	0.868	0.576	0.515124	S3T2	Iah1
2.19168e-05	0.390975	1	0.829	0.613627	S3T2	Hrsp12
2.44403e-05	0.27914	0.453	0.207	0.684279	S3T2	Ggct
2.54212e-05	0.273134	0.453	0.21	0.711741	S3T2	Lrrk2
2.84344e-05	0.286786	1	0.999	0.796106	S3T2	mt-Cytb
3.2789e-05	0.333359	0.66	0.374	0.918025	S3T2	Tmem229a
3.34035e-05	0.34012	0.868	0.588	0.935231	S3T2	Usp50
3.47134e-05	0.316424	0.906	0.755	0.971904	S3T2	Lamp2
3.81024e-05	0.329239	0.679	0.376	1	S3T2	Nat8
3.97991e-05	0.388402	0.717	0.445	1	S3T2	Me1
4.24202e-05	0.338269	0.717	0.451	1	S3T2	Cd164
5.22513e-05	0.4112	0.755	0.557	1	S3T2	Polr2l
5.46366e-05	0.313876	0.943	0.809	1	S3T2	Vamp8
5.8447e-05	0.306101	0.887	0.59	1	S3T2	Bdh2
6.26316e-05	0.389441	0.302	0.121	1	S3T2	Acsm5
6.42428e-05	0.390216	0.887	0.715	1	S3T2	Akr7a5
6.62483e-05	0.39578	0.528	0.289	1	S3T2	Arrdc3
6.82242e-05	0.300506	0.585	0.323	1	S3T2	Tnfrsf21
7.15178e-05	0.419443	0.774	0.496	1	S3T2	BC026585
8.62798e-05	0.36831	0.642	0.378	1	S3T2	Papss2
9.55087e-05	0.339206	0.811	0.545	1	S3T2	Nus1
0.000100478	0.300654	0.849	0.529	1	S3T2	Slc17a1
0.000105714	0.290417	0.887	0.667	1	S3T2	Pdzk1
0.000141158	0.279753	0.755	0.51	1	S3T2	Selt
0.000142876	0.267769	0.434	0.201	1	S3T2	Mfap3l
0.000147739	0.31277	0.849	0.588	1	S3T2	Lactb2
0.000153956	0.265768	0.906	0.614	1	S3T2	Cda
0.000157282	0.255933	0.755	0.462	1	S3T2	Tspo
0.000164542	0.308059	0.774	0.502	1	S3T2	Ddah1
0.000175187	0.259833	0.377	0.179	1	S3T2	L2hgdh
0.000181638	0.324805	0.698	0.431	1	S3T2	Dnajb6
0.00020224	0.296256	0.434	0.216	1	S3T2	Pdia4
0.000226601	0.347682	0.604	0.37	1	S3T2	Pcbd2
0.000243535	0.33625	0.736	0.479	1	S3T2	Tmem205
0.000256364	0.284779	0.755	0.559	1	S3T2	Abhd14b
0.000273535	0.313503	0.358	0.164	1	S3T2	Qprt
0.000292614	0.265178	0.83	0.558	1	S3T2	Stra13
0.000314574	0.25367	0.491	0.26	1	S3T2	Glyctk
0.000315714	0.277814	0.377	0.177	1	S3T2	Rdh16
0.000347875	0.290616	0.906	0.706	1	S3T2	0610011F06Rik
0.000348964	0.294934	0.642	0.416	1	S3T2	Aldh8a1
0.000355564	0.359965	0.547	0.322	1	S3T2	Med21
0.000360724	0.277505	0.434	0.225	1	S3T2	Gpc4
0.000387819	0.276074	0.434	0.218	1	S3T2	B230118H07Rik
0.000417887	0.327347	0.868	0.628	1	S3T2	Slc25a39
0.000421929	0.291871	0.604	0.393	1	S3T2	Ivd
0.000437217	0.406082	0.887	0.665	1	S3T2	Ech1
0.000530467	0.268947	0.698	0.47	1	S3T2	Fah
0.000573414	0.300904	0.887	0.81	1	S3T2	Nop10
0.000594586	0.271439	0.679	0.407	1	S3T2	Echdc2
0.000603049	0.272346	0.264	0.114	1	S3T2	Aacs
0.000872366	0.260732	0.736	0.488	1	S3T2	Sypl
0.000977531	0.258091	0.528	0.314	1	S3T2	Ndfip2
0.00104124	0.253102	0.585	0.34	1	S3T2	Them7
0.0010963	0.293161	0.679	0.415	1	S3T2	Ephx2
0.00117123	0.286625	0.491	0.281	1	S3T2	Eci2
0.00119768	0.315251	0.717	0.505	1	S3T2	Hspa5
0.00120452	0.260343	0.509	0.303	1	S3T2	Pxmp4
0.001291	0.320857	0.642	0.453	1	S3T2	Lgals1
0.00130013	0.27815	0.981	0.954	1	S3T2	Prdx1
0.00144681	0.260899	0.283	0.136	1	S3T2	Vnn1
0.00150581	0.337171	0.623	0.431	1	S3T2	H2-Ke6
0.0016782	0.254539	0.472	0.269	1	S3T2	Nadk
0.00176826	0.348375	0.66	0.438	1	S3T2	Hgd
0.00180722	0.335383	0.679	0.499	1	S3T2	Cib1
0.00195137	0.327842	0.415	0.246	1	S3T2	D17Wsu92e
0.00220672	0.30349	0.906	0.697	1	S3T2	Tmem176b
0.0022645	0.260575	0.962	0.89	1	S3T2	mt-Nd4l
0.00253978	0.286686	0.811	0.59	1	S3T2	Eny2
0.00299996	0.298148	0.472	0.297	1	S3T2	Trps1
0.00308422	0.254499	0.528	0.324	1	S3T2	Abcc2
0.00388502	0.283929	0.472	0.287	1	S3T2	Trim7
0.00406305	0.269362	0.264	0.134	1	S3T2	Atg101
0.00410605	0.316726	0.623	0.462	1	S3T2	Hykk
0.00451983	0.299985	0.774	0.632	1	S3T2	Calm3
0.00497323	0.260487	0.604	0.396	1	S3T2	Igf1r
0.00502122	0.500392	0.755	0.587	1	S3T2	Mat2a
0.00538996	0.264228	0.396	0.224	1	S3T2	Slco3a1
0.00659703	0.25778	0.774	0.596	1	S3T2	Stard10
0.00673108	0.297781	0.396	0.243	1	S3T2	Psmc6
0.0069974	0.348919	0.906	0.741	1	S3T2	Hibadh
0.00700293	0.250867	1	0.829	1	S3T2	Spink1
0.00747429	0.280848	0.547	0.377	1	S3T2	Ctsh
0.00879591	0.276681	0.547	0.368	1	S3T2	Gatad1
0	3.8051	0.979	0.083	0	LOH	Slc12a1
0	2.90615	0.965	0.23	0	LOH	Egf
0	2.72459	0.973	0.211	0	LOH	Wfdc15b
0	2.15447	0.997	0.192	0	LOH	Ppp1r1a
0	2.1321	0.909	0.142	0	LOH	Sostdc1
0	1.86278	0.837	0.109	0	LOH	Slc5a3
0	1.73922	0.567	0.014	0	LOH	Nccrp1
0	1.71183	0.968	0.197	0	LOH	Kng2
0	1.68201	0.936	0.165	0	LOH	Cd24a
0	1.63263	0.674	0.033	0	LOH	Ppp1r1b
0	1.33481	0.652	0.011	0	LOH	Cldn19
0	1.19778	0.505	0.018	0	LOH	Ptger3
0	1.14594	0.54	0.041	0	LOH	Gpx6
0	0.955211	0.316	0.002	0	LOH	Tmem207
0	0.828645	0.329	0.003	0	LOH	Cldn16
0	0.795446	0.401	0.016	0	LOH	Dusp15
0	0.738268	0.289	0.005	0	LOH	Pcsk6
0	0.614585	0.302	0.004	0	LOH	Pla1a
1.58355e-303	3.16762	0.989	0.288	4.43363e-299	LOH	Umod
6.45534e-291	1.06664	0.548	0.048	1.80737e-286	LOH	Clcnka
6.61588e-280	0.608835	0.318	0.01	1.85231e-275	LOH	Erbb4
2.27191e-265	1.57764	0.789	0.134	6.36091e-261	LOH	Ckb
1.03549e-248	1.17779	0.668	0.096	2.89916e-244	LOH	Mfsd4
6.14533e-228	1.64857	0.896	0.272	1.72057e-223	LOH	Mrps6
1.60396e-225	1.25827	0.701	0.121	4.49078e-221	LOH	Epcam
3.34862e-217	0.556834	0.254	0.009	9.37547e-213	LOH	Gm12927
1.74103e-216	1.08815	0.591	0.082	4.87453e-212	LOH	Tfap2b
7.83912e-213	0.63054	0.294	0.014	2.1948e-208	LOH	Pak6
2.17062e-212	1.07965	0.666	0.109	6.0773e-208	LOH	Tmem72
2.336e-210	1.69958	0.997	0.524	6.54034e-206	LOH	Ly6a
9.03639e-210	1.11209	0.826	0.166	2.53001e-205	LOH	Kcnj1
1.20312e-205	1.04532	0.631	0.102	3.36851e-201	LOH	Tspan8
4.88408e-200	1.51438	0.799	0.184	1.36744e-195	LOH	Wfdc2
1.5824e-197	1.79679	0.979	0.433	4.4304e-193	LOH	Mt1
1.17311e-194	1.08416	0.826	0.182	3.28448e-190	LOH	Mal
1.20878e-191	0.662168	0.366	0.03	3.38433e-187	LOH	Scin
4.11789e-191	0.80511	0.364	0.031	1.15293e-186	LOH	4732465J04Rik
7.72461e-186	1.40602	0.642	0.117	2.16274e-181	LOH	Mt2
7.91905e-185	0.887796	0.473	0.06	2.21718e-180	LOH	Slit2
2.65327e-177	1.30744	0.922	0.36	7.42864e-173	LOH	Nudt4
1.33554e-172	0.885439	0.436	0.054	3.73925e-168	LOH	Gcgr
3.79331e-163	1.32532	0.738	0.22	1.06205e-158	LOH	Dst
1.72622e-161	1.02495	0.559	0.104	4.83307e-157	LOH	Rap1gap
1.79071e-161	0.587051	0.305	0.025	5.01363e-157	LOH	Gm13111
1.28136e-160	0.608221	0.318	0.027	3.58756e-156	LOH	Sytl2
1.34683e-154	1.18234	0.989	0.861	3.77085e-150	LOH	Atp1b1
1.24296e-153	1.20052	1	0.839	3.48003e-149	LOH	Atp1a1
8.91607e-153	0.922223	0.618	0.125	2.49632e-148	LOH	Mecom
1.41215e-149	0.934316	0.668	0.152	3.95373e-145	LOH	Efhd1
4.60266e-149	0.734675	0.572	0.107	1.28865e-144	LOH	Crip2
9.63168e-148	1.14858	0.741	0.232	2.69668e-143	LOH	Etnk1
8.35238e-144	0.882973	0.259	0.02	2.3385e-139	LOH	Foxq1
1.1981e-141	0.879885	0.564	0.116	3.35444e-137	LOH	Cd82
6.81244e-141	0.7007	0.364	0.045	1.90735e-136	LOH	Nrbp2
1.50091e-134	0.932877	0.789	0.221	4.20225e-130	LOH	Pkm
2.07252e-130	1.12331	0.754	0.276	5.80265e-126	LOH	Paqr5
3.8285e-128	0.904647	0.567	0.135	1.0719e-123	LOH	Pde1a
5.351e-128	0.908414	0.513	0.107	1.49817e-123	LOH	Cd59a
3.98273e-127	0.696916	0.374	0.053	1.11509e-122	LOH	Cacnb4
5.30496e-123	0.639953	0.356	0.049	1.48528e-118	LOH	Fads6
8.33114e-123	1.34749	0.674	0.217	2.33255e-118	LOH	Gadd45g
9.08351e-123	0.870013	0.906	0.474	2.5432e-118	LOH	Klk1
3.08548e-120	0.719825	0.537	0.115	8.63872e-116	LOH	Krt7
4.85626e-119	1.04228	0.837	0.33	1.35965e-114	LOH	Txnip
3.53942e-115	0.858642	0.551	0.139	9.90966e-111	LOH	Pou3f3
3.8847e-114	1.03312	0.722	0.279	1.08764e-109	LOH	Cyfip2
2.53076e-110	0.717159	0.43	0.081	7.08561e-106	LOH	Tspan12
5.17445e-108	0.766852	0.348	0.057	1.44874e-103	LOH	Slc5a1
4.93484e-106	0.671114	0.735	0.211	1.38166e-101	LOH	Tmem213
2.81415e-104	0.72293	0.455	0.096	7.87906e-100	LOH	Hk1
5.94762e-104	1.00586	0.722	0.317	1.66521e-99	LOH	Aktip
1.04097e-101	0.883125	0.591	0.185	2.9145e-97	LOH	Baiap2l2
2.34394e-100	0.552376	0.294	0.04	6.56256e-96	LOH	1700028J19Rik
1.71919e-99	0.869098	0.957	0.597	4.81339e-95	LOH	Spp1
2.51101e-98	0.99433	0.567	0.16	7.03033e-94	LOH	Clcnkb
3.60084e-98	0.350784	0.31	0.044	1.00816e-93	LOH	Apela
2.91106e-95	0.576356	0.342	0.057	8.15039e-91	LOH	Emb
9.93558e-95	0.795232	0.463	0.112	2.78176e-90	LOH	Pantr1
1.47714e-93	0.602217	0.353	0.064	4.13571e-89	LOH	Ak1
1.93696e-93	0.681922	0.39	0.078	5.4231e-89	LOH	Bsnd
4.40132e-92	0.486127	0.278	0.039	1.23228e-87	LOH	Fam81a
1.79501e-91	0.692301	0.476	0.112	5.02566e-87	LOH	Slc16a7
6.75504e-91	0.703099	0.356	0.068	1.89128e-86	LOH	Fgf9
4.1346e-90	0.536375	0.267	0.037	1.1576e-85	LOH	Fam107a
5.09293e-88	0.783406	0.591	0.198	1.42592e-83	LOH	Adgrg1
1.38925e-87	0.566788	0.294	0.048	3.88963e-83	LOH	B4galt6
2.63594e-87	0.488248	0.27	0.039	7.3801e-83	LOH	Slc2a4
2.78008e-87	0.800822	0.564	0.179	7.78366e-83	LOH	Ndrg2
5.57219e-85	0.724299	0.436	0.105	1.5601e-80	LOH	Tesc
4.09928e-84	0.61264	0.332	0.064	1.14772e-79	LOH	Mapk15
2.11562e-81	0.692054	0.393	0.09	5.9233e-77	LOH	Smim5
1.196e-80	0.685606	0.329	0.066	3.34857e-76	LOH	Tmem86a
4.21357e-80	0.59301	0.324	0.062	1.17971e-75	LOH	Slc1a5
5.98721e-80	0.863439	0.89	0.652	1.6763e-75	LOH	Bag1
2.52859e-79	0.772659	0.874	0.584	7.07953e-75	LOH	Spint2
5.84976e-76	0.542997	0.332	0.068	1.63782e-71	LOH	Ninl
7.38389e-76	0.768968	0.594	0.226	2.06734e-71	LOH	Smagp
5.13811e-75	0.722601	0.513	0.171	1.43857e-70	LOH	Sorl1
2.76144e-74	0.527326	0.433	0.109	7.73149e-70	LOH	Ptpn18
1.35378e-73	0.614664	0.414	0.104	3.79032e-69	LOH	Pcolce
1.37156e-72	0.919504	0.904	0.631	3.84008e-68	LOH	Neat1
6.88988e-72	0.451881	0.27	0.047	1.92903e-67	LOH	Tmem30b
7.63719e-72	0.475728	0.299	0.058	2.13826e-67	LOH	Kcnk1
1.05849e-71	0.687741	0.417	0.115	2.96356e-67	LOH	Me3
1.52031e-71	0.782541	0.666	0.303	4.25656e-67	LOH	Ppargc1a
1.73589e-70	0.83716	0.762	0.43	4.86015e-66	LOH	1700011H14Rik
3.50918e-69	0.73908	0.508	0.181	9.825e-65	LOH	Gm17750
1.02032e-67	0.650813	0.604	0.232	2.85669e-63	LOH	Aif1l
1.36901e-65	0.492951	0.281	0.057	3.83294e-61	LOH	Plau
4.38e-65	0.710601	0.85	0.575	1.22631e-60	LOH	Mgst3
8.72097e-65	0.812854	0.682	0.312	2.4417e-60	LOH	Fabp3
1.77219e-64	0.710575	0.567	0.234	4.96177e-60	LOH	Acadsb
5.86503e-63	0.492547	0.324	0.077	1.64209e-58	LOH	Twsg1
1.30615e-62	0.495456	0.997	0.968	3.65697e-58	LOH	Cox5b
2.80337e-62	0.470455	0.35	0.085	7.84888e-58	LOH	Bcam
4.24826e-62	0.678853	0.473	0.164	1.18943e-57	LOH	Nfe2l1
1.03193e-59	0.426239	0.251	0.049	2.88919e-55	LOH	Slc16a5
3.55436e-59	0.596764	0.364	0.104	9.95149e-55	LOH	Bckdhb
1.1923e-58	0.501532	0.273	0.058	3.3382e-54	LOH	Kctd1
3.81219e-58	0.455988	0.302	0.07	1.06734e-53	LOH	Ildr1
6.68147e-58	0.719247	0.588	0.279	1.87068e-53	LOH	Cgnl1
2.07652e-57	0.433282	0.358	0.091	5.81383e-53	LOH	Abca13
3.02792e-56	0.605255	0.457	0.16	8.47757e-52	LOH	Bcat2
3.23621e-56	0.452138	0.251	0.052	9.06073e-52	LOH	Sv2a
9.5425e-56	0.543205	0.283	0.067	2.67171e-51	LOH	C1qtnf4
1.71058e-54	0.450762	0.278	0.064	4.78928e-50	LOH	Cytip
2.5429e-54	0.340799	1	0.99	7.11962e-50	LOH	Cox8a
1.53307e-52	0.608483	0.882	0.638	4.2923e-48	LOH	Sdc4
2.00027e-52	0.583657	0.866	0.667	5.60034e-48	LOH	1110001J03Rik
4.48903e-52	0.588039	0.422	0.152	1.25684e-47	LOH	Pik3r1
1.124e-51	0.684518	0.848	0.642	3.14699e-47	LOH	Idh2
2.48079e-51	1.15292	0.372	0.115	6.94571e-47	LOH	Sfrp1
1.0846e-50	0.418026	0.267	0.063	3.03666e-46	LOH	St14
1.51116e-50	0.633398	0.858	0.691	4.23094e-46	LOH	Ivns1abp
1.80393e-50	0.381391	0.262	0.06	5.05063e-46	LOH	Gal3st1
3.67054e-50	0.507389	0.404	0.137	1.02768e-45	LOH	Stard8
7.61684e-50	0.580371	0.503	0.205	2.13256e-45	LOH	Gbas
8.4809e-50	0.429627	0.283	0.071	2.37448e-45	LOH	Rab25
2.35854e-49	0.430493	0.257	0.059	6.60345e-45	LOH	Pfkp
9.95577e-49	0.602845	0.872	0.694	2.78742e-44	LOH	Sec62
3.29927e-48	0.450696	0.332	0.095	9.23728e-44	LOH	2020-09-01
4.5672e-48	0.586709	0.382	0.125	1.27872e-43	LOH	Hes1
5.93514e-48	0.644441	0.578	0.283	1.66172e-43	LOH	Selm
8.69122e-48	0.366873	0.254	0.057	2.43337e-43	LOH	Anxa2
2.39361e-47	0.595526	0.452	0.179	6.70162e-43	LOH	Irf2bpl
2.45799e-47	0.549405	0.5	0.202	6.88188e-43	LOH	Cdh1
2.60304e-47	0.450613	0.262	0.066	7.28799e-43	LOH	Ocln
2.81447e-47	0.470204	0.332	0.099	7.87994e-43	LOH	Laptm4b
3.37773e-47	0.570371	0.42	0.155	9.45696e-43	LOH	Prps2
1.11752e-46	0.53284	0.564	0.252	3.12883e-42	LOH	Wnk4
1.36783e-46	0.532972	0.837	0.62	3.82966e-42	LOH	Cd81
1.19032e-45	0.538857	0.433	0.163	3.33265e-41	LOH	Tanc1
2.52666e-45	0.611152	0.476	0.209	7.07413e-41	LOH	P3h2
3.03717e-45	0.433691	0.307	0.09	8.50347e-41	LOH	Mpnd
5.62016e-45	0.370692	0.267	0.069	1.57353e-40	LOH	Slc2a1
9.32145e-44	0.459626	0.979	0.939	2.60982e-39	LOH	Cox7b
1.65932e-43	0.507493	0.949	0.876	4.64577e-39	LOH	Aldoa
2.50116e-43	0.489458	0.332	0.1	7.00274e-39	LOH	Kcnj10
3.78367e-43	0.581162	0.412	0.159	1.05935e-38	LOH	Cdkl1
6.24951e-43	0.484473	0.286	0.081	1.74974e-38	LOH	Litaf
2.97511e-42	0.39429	0.251	0.066	8.3297e-38	LOH	Enpp1
3.46463e-42	0.43853	0.254	0.066	9.70026e-38	LOH	Hmgn3
2.61539e-41	0.446487	0.313	0.098	7.32256e-37	LOH	St3gal6
6.80373e-41	0.404327	0.414	0.145	1.90491e-36	LOH	Cldn8
1.22169e-40	0.519055	0.361	0.128	3.4205e-36	LOH	Fzd4
2.72481e-39	0.599705	0.358	0.136	7.62892e-35	LOH	Lamb1
5.95279e-39	0.620523	0.561	0.305	1.66666e-34	LOH	Mgst1
6.73469e-38	0.497895	0.366	0.139	1.88558e-33	LOH	Shmt1
3.59185e-37	0.354908	0.984	0.967	1.00565e-32	LOH	Uqcrh
6.54067e-37	0.571479	0.575	0.339	1.83126e-32	LOH	Pkp4
2.10692e-36	0.392694	0.257	0.075	5.89895e-32	LOH	Pdk1
2.13383e-36	0.445813	0.976	0.899	5.97429e-32	LOH	Ldhb
6.3479e-36	0.438491	0.289	0.095	1.77728e-31	LOH	Hoxb6
1.73877e-35	0.402754	0.289	0.096	4.8682e-31	LOH	Capn2
1.15066e-34	0.557905	0.741	0.545	3.22162e-30	LOH	Rabac1
1.25748e-34	0.490299	0.433	0.188	3.52068e-30	LOH	Anxa5
1.71836e-34	0.534181	0.567	0.324	4.81106e-30	LOH	Gm44386
2.33513e-34	0.405663	0.316	0.108	6.53791e-30	LOH	Lgals3
5.15917e-34	0.420792	0.254	0.077	1.44446e-29	LOH	Atp6v1b1
5.23656e-34	0.522472	0.781	0.601	1.46613e-29	LOH	Cdh16
6.6306e-34	0.356294	1	0.982	1.85644e-29	LOH	Cox6b1
7.94642e-34	0.583641	0.668	0.453	2.22484e-29	LOH	Ogt
6.0961e-33	0.47133	0.511	0.271	1.70679e-28	LOH	Wwc1
7.3963e-33	0.383717	0.283	0.095	2.07082e-28	LOH	Bcl2
6.08037e-32	0.334987	0.265	0.083	1.70238e-27	LOH	Ckmt1
6.89883e-32	0.446458	0.316	0.121	1.93153e-27	LOH	Enah
1.62557e-30	0.420107	0.278	0.098	4.55126e-26	LOH	Adcy6
4.67638e-30	0.511504	0.398	0.187	1.30929e-25	LOH	Tmem116
3.52039e-29	0.51111	0.508	0.292	9.85638e-25	LOH	Usp2
4.5087e-29	0.405459	1	1	1.26235e-24	LOH	mt-Co1
6.04573e-29	0.331145	0.963	0.927	1.69268e-24	LOH	Atp5a1
6.3049e-29	0.351945	0.952	0.931	1.76525e-24	LOH	Ndufb9
3.2201e-28	0.308427	0.267	0.09	9.01564e-24	LOH	Tspan1
4.76217e-28	0.463836	0.433	0.228	1.33331e-23	LOH	Deptor
5.09725e-28	0.267571	0.995	0.976	1.42713e-23	LOH	Cox7a2
7.10808e-28	0.540515	0.468	0.26	1.99012e-23	LOH	Syne2
9.5794e-28	0.479923	0.521	0.299	2.68204e-23	LOH	Tfcp2l1
4.06142e-27	0.291049	0.971	0.943	1.13712e-22	LOH	Itm2b
7.6541e-27	0.377726	0.257	0.092	2.14299e-22	LOH	Hoxb4
1.07553e-26	0.424932	0.313	0.132	3.01128e-22	LOH	Mavs
2.75313e-26	0.371893	0.971	0.938	7.7082e-22	LOH	Atp5h
3.26306e-26	0.396288	0.356	0.158	9.13592e-22	LOH	Pbxip1
9.48317e-26	0.296019	0.992	0.96	2.6551e-21	LOH	Atp5g1
1.05945e-25	0.377876	0.257	0.09	2.96625e-21	LOH	Tnfaip2
1.19097e-25	0.320257	0.337	0.134	3.33447e-21	LOH	Scnn1a
2.25083e-25	0.453024	0.527	0.306	6.30187e-21	LOH	Chka
1.10973e-24	0.356891	0.275	0.106	3.10702e-20	LOH	Ahnak
1.48666e-24	0.377929	0.281	0.115	4.16235e-20	LOH	Mme
1.25056e-23	0.496639	0.647	0.507	3.50133e-19	LOH	Camk2n1
1.53619e-23	0.312012	0.904	0.818	4.30102e-19	LOH	S100a1
1.56876e-23	0.383072	0.31	0.138	4.39222e-19	LOH	Arhgap29
2.49039e-23	0.444368	0.898	0.843	6.97259e-19	LOH	Gabarapl1
3.44464e-23	0.436756	0.826	0.73	9.64429e-19	LOH	Bri3
6.61434e-23	0.388826	0.302	0.125	1.85188e-18	LOH	Hoxb5os
7.96244e-23	0.328118	0.968	0.946	2.22932e-18	LOH	Slc25a5
8.5552e-23	0.459223	0.452	0.263	2.39529e-18	LOH	Thap4
8.6482e-23	0.366592	0.291	0.127	2.42132e-18	LOH	Kifc3
9.33648e-23	0.371179	0.267	0.109	2.61403e-18	LOH	Gadd45a
9.58398e-23	0.505036	0.396	0.215	2.68332e-18	LOH	Pfn2
1.0727e-22	0.38308	0.281	0.118	3.00335e-18	LOH	Bag4
1.43326e-22	0.366125	0.275	0.117	4.01284e-18	LOH	Spcs3
1.76349e-22	0.287039	0.259	0.099	4.93743e-18	LOH	Ermp1
3.5631e-22	0.365941	0.727	0.518	9.97596e-18	LOH	Lpl
5.01898e-22	0.389587	0.93	0.865	1.40522e-17	LOH	Ndufa5
5.06564e-22	0.418975	0.433	0.251	1.41828e-17	LOH	Arhgap5
1.0296e-21	0.420067	0.382	0.207	2.88267e-17	LOH	Crb3
1.06307e-21	0.256628	0.992	0.976	2.97637e-17	LOH	Atp5e
1.55764e-21	0.419473	0.377	0.2	4.36108e-17	LOH	Lman1
1.73435e-21	0.38211	0.409	0.203	4.85583e-17	LOH	Hoxd8
7.30684e-21	0.35189	0.324	0.155	2.04577e-16	LOH	Chchd6
1.15646e-20	0.302995	1	1	3.23785e-16	LOH	mt-Co3
1.28337e-20	0.364877	0.377	0.184	3.59317e-16	LOH	Cd9
1.57548e-20	0.431857	0.43	0.256	4.41102e-16	LOH	Zmiz1
2.55977e-20	0.450778	0.428	0.261	7.16684e-16	LOH	Pkhd1
2.75262e-20	0.318085	0.267	0.114	7.70679e-16	LOH	Tmem123
3.22007e-20	0.864303	0.647	0.641	9.01555e-16	LOH	Cldn10
4.56891e-20	0.366541	0.291	0.136	1.2792e-15	LOH	Copz2
6.38129e-20	0.360788	0.321	0.158	1.78663e-15	LOH	Slc38a10
8.84927e-20	0.358534	0.278	0.128	2.47762e-15	LOH	Trak2
1.26835e-19	0.34075	0.821	0.734	3.55113e-15	LOH	Aes
1.48508e-19	0.385217	0.794	0.714	4.15792e-15	LOH	Eif4a2
1.62508e-19	0.380549	0.259	0.114	4.54989e-15	LOH	Pmepa1
1.65799e-19	0.367617	0.353	0.184	4.64203e-15	LOH	Prom1
2.28819e-19	0.27975	0.987	0.956	6.40649e-15	LOH	Atp5k
2.67119e-19	0.279467	0.893	0.799	7.47879e-15	LOH	Oxct1
2.67801e-19	0.397704	0.476	0.304	7.49789e-15	LOH	Hadha
3.33293e-19	0.395996	0.35	0.188	9.33154e-15	LOH	Tia1
1.00951e-18	0.427094	0.492	0.331	2.82643e-14	LOH	Nr2f2
1.09259e-18	0.365259	0.294	0.143	3.05902e-14	LOH	Tcf7l2
1.78445e-18	0.446493	0.436	0.276	4.99611e-14	LOH	Gls
2.06844e-18	0.392683	0.497	0.328	5.79122e-14	LOH	Bicc1
2.09394e-18	0.330509	0.281	0.129	5.8626e-14	LOH	Hoxd9
2.21835e-18	0.429011	0.465	0.298	6.21094e-14	LOH	Lsm6
3.25773e-18	0.363293	0.278	0.132	9.12099e-14	LOH	Mknk2
3.26589e-18	0.296101	1	1	9.14384e-14	LOH	mt-Atp6
3.98025e-18	0.367185	0.348	0.187	1.11439e-13	LOH	Dag1
4.19246e-18	0.325131	0.278	0.127	1.1738e-13	LOH	Pycard
5.921e-18	0.397388	0.773	0.709	1.65776e-13	LOH	Tns1
9.21106e-18	0.359644	0.321	0.168	2.57891e-13	LOH	Nfyc
1.04973e-17	0.426634	0.583	0.443	2.93903e-13	LOH	Phb
1.09734e-17	0.328247	0.27	0.128	3.07234e-13	LOH	Foxo3
1.12356e-17	0.348396	0.372	0.21	3.14573e-13	LOH	Mbnl2
1.25205e-17	0.319619	0.302	0.152	3.50549e-13	LOH	Mturn
1.43542e-17	0.388555	0.366	0.204	4.0189e-13	LOH	Nfat5
1.6202e-17	0.494174	0.607	0.468	4.53624e-13	LOH	H1f0
2.00101e-17	0.330769	0.259	0.121	5.60242e-13	LOH	2310001H17Rik
4.18915e-17	0.362445	0.316	0.163	1.17288e-12	LOH	Vamp2
6.75902e-17	0.350265	0.305	0.155	1.89239e-12	LOH	Serpinh1
7.03995e-17	0.328915	0.693	0.541	1.97104e-12	LOH	Ctsd
7.41619e-17	0.263852	0.556	0.369	2.07638e-12	LOH	Wnk1
8.24193e-17	0.266929	0.933	0.897	2.30758e-12	LOH	Ndufb8
1.10567e-16	0.36928	0.267	0.132	3.09566e-12	LOH	0610040J01Rik
1.13455e-16	0.323835	0.858	0.785	3.17652e-12	LOH	Ndufa11
1.27945e-16	0.366838	0.358	0.206	3.58219e-12	LOH	Lmo7
1.5045e-16	0.336381	0.799	0.709	4.21229e-12	LOH	Ndufv2
1.5465e-16	0.25573	0.989	0.969	4.32989e-12	LOH	Atp5j
2.07558e-16	0.36728	0.329	0.181	5.8112e-12	LOH	Smpd1
2.18009e-16	0.280535	0.963	0.956	6.10381e-12	LOH	mt-Nd3
2.27109e-16	0.394718	0.433	0.285	6.35861e-12	LOH	Cyhr1
2.93809e-16	0.449759	0.487	0.33	8.22607e-12	LOH	Ccnd1
3.07424e-16	0.308521	0.866	0.838	8.60726e-12	LOH	Ndufb7
3.56559e-16	0.381456	0.666	0.548	9.98295e-12	LOH	Mcee
3.67151e-16	0.36895	0.604	0.466	1.02795e-11	LOH	Hcfc1r1
6.37453e-16	0.294404	0.251	0.117	1.78474e-11	LOH	Bdh1
8.10679e-16	0.314351	0.262	0.127	2.26974e-11	LOH	Map3k1
8.16679e-16	0.378321	0.342	0.199	2.28654e-11	LOH	Epb41l5
1.01327e-15	0.364148	0.345	0.202	2.83696e-11	LOH	Myo18a
1.11547e-15	0.364422	0.321	0.179	3.12309e-11	LOH	Hs6st1
2.75142e-15	0.333188	0.294	0.159	7.70342e-11	LOH	BC034090
2.7789e-15	0.324924	0.254	0.123	7.78036e-11	LOH	Top3b
2.85728e-15	0.395755	0.356	0.212	7.9998e-11	LOH	Fam63a
4.05792e-15	0.404637	0.449	0.31	1.13614e-10	LOH	Itgb6
6.88795e-15	0.289115	0.27	0.137	1.92849e-10	LOH	Slc25a12
9.35335e-15	0.284219	0.786	0.675	2.61875e-10	LOH	Atp6v0e
1.40252e-14	0.326945	0.361	0.213	3.92676e-10	LOH	Got1
1.60166e-14	0.335737	0.358	0.22	4.48434e-10	LOH	Wwc2
2.32198e-14	0.371384	0.439	0.301	6.50107e-10	LOH	Eps8l2
2.37577e-14	0.328232	0.537	0.394	6.65169e-10	LOH	Hadhb
2.78046e-14	0.309894	0.356	0.206	7.78474e-10	LOH	Cbx5
4.20529e-14	0.349274	0.334	0.197	1.1774e-09	LOH	Elovl7
6.86562e-14	0.351162	0.794	0.714	1.92224e-09	LOH	Cox7a2l
8.14847e-14	0.351177	0.275	0.15	2.28141e-09	LOH	Thra
8.1648e-14	0.263572	0.888	0.84	2.28598e-09	LOH	Ndufb2
8.50939e-14	0.357083	0.412	0.27	2.38246e-09	LOH	Eva1a
9.72993e-14	0.350284	0.305	0.176	2.72419e-09	LOH	Mthfd2l
9.74741e-14	0.291575	0.567	0.427	2.72908e-09	LOH	Aplp2
1.0705e-13	0.334272	0.452	0.309	2.99718e-09	LOH	Arl3
1.28869e-13	0.382925	0.513	0.402	3.60808e-09	LOH	Pura
1.45768e-13	0.324962	0.358	0.218	4.08121e-09	LOH	Sptan1
1.99929e-13	0.365764	0.404	0.27	5.5976e-09	LOH	Ggnbp1
2.16023e-13	0.356122	0.281	0.154	6.04822e-09	LOH	Chkb
2.6706e-13	0.317367	0.324	0.188	7.47714e-09	LOH	Snhg20
3.14522e-13	0.344791	0.425	0.298	8.80598e-09	LOH	Rnf128
3.79029e-13	0.332685	0.324	0.194	1.0612e-08	LOH	Ppp2r5a
4.09191e-13	0.374805	0.513	0.405	1.14565e-08	LOH	Ctnnb1
5.29853e-13	0.311743	0.39	0.254	1.48348e-08	LOH	Nnt
7.19275e-13	0.299977	0.882	0.841	2.01383e-08	LOH	Ndufb10
7.21176e-13	0.323728	0.342	0.204	2.01915e-08	LOH	Mprip
9.08091e-13	0.382022	0.447	0.321	2.54247e-08	LOH	Itgav
1.10211e-12	0.384077	0.912	0.845	3.08568e-08	LOH	Cystm1
1.20429e-12	0.277523	0.275	0.152	3.37178e-08	LOH	Creb3l2
2.17434e-12	0.332661	0.545	0.437	6.08771e-08	LOH	Sptbn1
3.28526e-12	0.292494	0.267	0.148	9.19808e-08	LOH	Osbpl1a
3.64069e-12	0.275937	0.257	0.138	1.01932e-07	LOH	Lrba
4.67903e-12	0.366453	0.364	0.239	1.31003e-07	LOH	Mrps23
4.8227e-12	0.355249	0.414	0.289	1.35026e-07	LOH	Tmed7
5.30959e-12	0.433304	0.262	0.14	1.48658e-07	LOH	Ier3
6.22689e-12	0.285857	0.318	0.19	1.74341e-07	LOH	Atp5sl
9.12772e-12	0.295262	0.521	0.413	2.55558e-07	LOH	Smim20
9.2589e-12	0.456009	0.358	0.211	2.59231e-07	LOH	Tmem52b
1.46654e-11	0.264504	0.778	0.69	4.10603e-07	LOH	App
1.55188e-11	0.297428	0.66	0.564	4.34496e-07	LOH	Calm2
1.73553e-11	0.350913	0.334	0.216	4.85913e-07	LOH	Il11ra1
2.42179e-11	0.32652	0.553	0.445	6.78054e-07	LOH	Sri
2.93407e-11	0.321417	0.369	0.249	8.21481e-07	LOH	Nfe2l2
3.41595e-11	0.325501	0.273	0.161	9.56398e-07	LOH	Pdrg1
4.21693e-11	0.353614	0.447	0.324	1.18066e-06	LOH	Rnaset2b
4.22913e-11	0.261124	0.289	0.171	1.18407e-06	LOH	Ddr1
4.30034e-11	0.258058	0.663	0.572	1.20401e-06	LOH	Gas6
4.54594e-11	0.323903	0.291	0.176	1.27277e-06	LOH	Atp2c1
5.32716e-11	0.308948	0.34	0.223	1.4915e-06	LOH	Tnrc6b
7.40311e-11	0.334406	0.398	0.281	2.07272e-06	LOH	Mif4gd
9.47716e-11	0.278093	0.636	0.537	2.65342e-06	LOH	Pnkd
1.13953e-10	0.251553	0.775	0.708	3.19046e-06	LOH	Mdh2
1.17663e-10	0.26516	0.299	0.182	3.29434e-06	LOH	Atp1b3
1.44082e-10	0.27053	0.775	0.716	4.03399e-06	LOH	Uqcrc1
1.4955e-10	0.290539	0.265	0.156	4.18711e-06	LOH	Brd8
2.12457e-10	0.264128	0.668	0.564	5.94838e-06	LOH	Son
2.1341e-10	0.281667	0.299	0.185	5.97506e-06	LOH	Vegfb
2.35905e-10	0.258231	0.444	0.317	6.60487e-06	LOH	Ctnna1
3.20774e-10	0.293036	0.281	0.169	8.98104e-06	LOH	Zmynd8
3.40593e-10	0.315201	0.455	0.351	9.53592e-06	LOH	Msi2
3.88217e-10	0.335344	0.259	0.156	1.08693e-05	LOH	Fermt2
4.164e-10	0.256083	0.369	0.248	1.16584e-05	LOH	Coq7
4.40122e-10	0.307424	0.449	0.341	1.23225e-05	LOH	Kidins220
4.64026e-10	0.284958	0.283	0.178	1.29918e-05	LOH	Kif1c
5.57371e-10	0.291347	0.31	0.197	1.56053e-05	LOH	Tmprss2
6.33839e-10	0.321672	0.521	0.426	1.77462e-05	LOH	Acsl1
7.36615e-10	0.282097	0.398	0.28	2.06237e-05	LOH	Ppp2r3a
9.5385e-10	0.270576	0.275	0.17	2.67059e-05	LOH	Glis2
1.34623e-09	0.475361	0.385	0.284	3.76917e-05	LOH	Hist1h1c
1.43348e-09	0.289971	0.275	0.169	4.01347e-05	LOH	Tax1bp3
1.44025e-09	0.294264	0.372	0.264	4.03242e-05	LOH	Nptn
1.58112e-09	0.276804	0.455	0.342	4.42683e-05	LOH	Idh3a
1.73156e-09	0.26433	0.259	0.156	4.84801e-05	LOH	Gipc1
2.26148e-09	0.280694	0.283	0.178	6.33169e-05	LOH	Trim2
2.89938e-09	0.320716	0.329	0.228	8.11768e-05	LOH	Lrp6
3.04944e-09	0.283923	0.62	0.551	8.53784e-05	LOH	Ogdh
3.25386e-09	0.315333	0.361	0.251	9.11017e-05	LOH	Pigp
3.38414e-09	0.283021	0.545	0.453	9.47491e-05	LOH	Mrps16
6.23086e-09	0.283954	0.642	0.546	0.000174452	LOH	Snhg18
6.70118e-09	0.279131	0.337	0.232	0.00018762	LOH	R3hdm4
6.9052e-09	0.254108	0.69	0.616	0.000193332	LOH	Ndufs3
8.61224e-09	0.283309	0.345	0.247	0.000241125	LOH	Arfgef1
8.69243e-09	0.274657	0.364	0.263	0.000243371	LOH	2310061I04Rik
1.01517e-08	0.296416	0.457	0.362	0.000284227	LOH	Pts
1.05225e-08	0.317614	0.495	0.42	0.000294608	LOH	Ccni
1.08767e-08	0.258704	0.441	0.348	0.000304526	LOH	Arhgap24
1.13728e-08	0.26589	0.307	0.205	0.000318414	LOH	Dnajc7
1.13875e-08	0.292846	0.267	0.173	0.000318826	LOH	Spint1
1.15289e-08	0.256445	0.42	0.313	0.000322786	LOH	Vimp
1.25892e-08	0.270563	0.709	0.663	0.000352471	LOH	Prdx2
1.44171e-08	0.254946	0.348	0.236	0.000403649	LOH	Ccdc141
1.58367e-08	0.256771	0.615	0.528	0.000443395	LOH	Fkbp2
1.87446e-08	0.261722	0.634	0.552	0.000524811	LOH	Ndufs4
1.89435e-08	0.279147	0.329	0.227	0.000530379	LOH	Zfp467
1.97953e-08	0.313668	0.658	0.581	0.00055423	LOH	Kcnj16
2.411e-08	0.281861	0.463	0.372	0.000675031	LOH	Rpp21
2.61695e-08	0.296787	0.361	0.26	0.000732694	LOH	Ttc14
3.00557e-08	0.311368	0.259	0.17	0.000841499	LOH	1500026H17Rik
3.8532e-08	0.308832	0.406	0.322	0.00107882	LOH	Pkd2
4.86891e-08	0.269697	0.58	0.529	0.0013632	LOH	Ypel3
5.90749e-08	0.251688	0.524	0.435	0.00165398	LOH	Tob1
6.14698e-08	0.252124	0.618	0.534	0.00172103	LOH	Ppib
6.98882e-08	0.309778	0.396	0.303	0.00195673	LOH	Fkbp3
7.25317e-08	0.286133	0.398	0.309	0.00203074	LOH	Prr15l
1.08211e-07	0.304154	0.366	0.275	0.0030297	LOH	Rnaset2a
1.11899e-07	0.25823	0.329	0.233	0.00313296	LOH	Cmc2
1.63907e-07	0.291091	0.417	0.325	0.00458906	LOH	Pttg1
2.08808e-07	0.254414	0.35	0.26	0.0058462	LOH	Becn1
2.72757e-07	0.263569	0.324	0.235	0.00763664	LOH	Mrps25
3.01338e-07	0.401185	0.372	0.301	0.00843687	LOH	Zfp503
5.65611e-07	0.276274	0.299	0.214	0.015836	LOH	Purb
6.68518e-07	0.279104	0.374	0.288	0.0187172	LOH	Ptprf
7.63055e-07	0.251634	0.257	0.177	0.021364	LOH	Ccbl1
7.66327e-07	0.266407	0.281	0.197	0.0214556	LOH	Lpcat3
1.13797e-06	0.259294	0.436	0.353	0.031861	LOH	Clk1
1.21498e-06	0.258255	0.257	0.175	0.034017	LOH	Stk25
1.42391e-06	0.278775	0.294	0.207	0.0398665	LOH	Wsb1
1.60609e-06	0.258161	0.449	0.383	0.0449674	LOH	Ppp1cb
1.83521e-06	0.256214	0.516	0.45	0.0513822	LOH	Wls
2.36059e-06	0.253684	0.69	0.662	0.0660917	LOH	Fis1
2.76825e-06	0.269074	0.436	0.361	0.0775056	LOH	Acadvl
3.86207e-06	0.294865	0.428	0.365	0.10813	LOH	Kxd1
7.32464e-06	0.273942	0.34	0.262	0.205075	LOH	Cox7a1
1.31006e-05	0.268094	0.265	0.191	0.366791	LOH	Hpcal1
2.61749e-05	0.2578	0.326	0.262	0.732846	LOH	Tnpo1
7.73242e-05	0.254681	0.321	0.26	1	LOH	Golgb1
0.000165735	0.262129	0.316	0.251	1	LOH	Kcnq1ot1
0.000182965	0.280706	0.273	0.217	1	LOH	AI317395
0	1.18538	0.741	0.029	0	CNT	Scnn1g
0	1.06693	0.706	0.012	0	CNT	Trpv5
5.09003e-300	0.984589	0.608	0.024	1.42511e-295	CNT	Ptges
1.23566e-286	1.13486	0.741	0.04	3.4596e-282	CNT	Scnn1b
1.72915e-265	0.981958	0.566	0.024	4.84128e-261	CNT	AI838599
4.4978e-255	0.980584	0.636	0.033	1.25929e-250	CNT	Atp2b4
1.50707e-229	0.40212	0.266	0.004	4.2195e-225	CNT	Slc8a1
2.44474e-216	1.03315	0.552	0.029	6.84478e-212	CNT	Ltc4s
5.56266e-212	0.683635	0.462	0.02	1.55743e-207	CNT	Hhatl
2.33008e-208	0.677164	0.49	0.023	6.52377e-204	CNT	Slc2a9
3.69889e-201	0.570657	0.406	0.015	1.03561e-196	CNT	Klk1b5
1.0704e-193	2.67722	1	0.161	2.9969e-189	CNT	Clu
1.83724e-184	0.464419	0.336	0.011	5.1439e-180	CNT	Scube3
1.73487e-180	3.34746	0.993	0.179	4.85729e-176	CNT	Calb1
9.03301e-173	0.954525	0.699	0.062	2.52906e-168	CNT	Cav2
1.87825e-160	1.24969	0.895	0.121	5.25873e-156	CNT	Scd2
6.53156e-155	1.19401	0.825	0.103	1.82871e-150	CNT	Rhcg
4.70606e-152	1.00305	0.573	0.048	1.3176e-147	CNT	Rhbg
1.48271e-150	1.53141	0.965	0.157	4.15129e-146	CNT	Pgam2
1.65073e-150	0.902941	0.629	0.06	4.62171e-146	CNT	Tacstd2
2.07459e-148	1.08845	0.762	0.094	5.80843e-144	CNT	Ermp1
1.3688e-146	1.22335	0.881	0.13	3.83237e-142	CNT	Scnn1a
4.02339e-141	1.46187	0.993	0.185	1.12647e-136	CNT	Kcnj1
1.61455e-138	1.0507	0.713	0.087	4.52041e-134	CNT	Tspan1
3.32758e-137	1.75091	1	0.203	9.31655e-133	CNT	Tmem52b
3.39829e-135	1.03707	0.755	0.099	9.51454e-131	CNT	Kcnj10
1.19661e-134	1.59279	0.993	0.201	3.35026e-130	CNT	Wfdc2
2.29681e-131	0.687193	0.503	0.042	6.43061e-127	CNT	Slc2a4
9.59009e-120	1.57691	0.594	0.069	2.68503e-115	CNT	Hsd11b2
8.7966e-116	0.588661	0.413	0.032	2.46287e-111	CNT	Phactr1
5.47476e-115	0.588073	0.49	0.045	1.53282e-110	CNT	Slc29a1
8.26325e-114	0.577031	0.392	0.03	2.31354e-109	CNT	Fzd7
7.32915e-110	0.576983	0.503	0.051	2.05202e-105	CNT	Kcnq1
5.61356e-109	2.06345	1	0.325	1.57169e-104	CNT	Defb1
1.13271e-108	0.501067	0.336	0.022	3.17135e-104	CNT	Olfm1
4.82837e-108	0.649566	0.476	0.046	1.35185e-103	CNT	Prom2
2.45617e-107	1.04065	0.832	0.146	6.87678e-103	CNT	Cldn8
2.40277e-104	1.13176	0.951	0.201	6.72729e-100	CNT	Mal
7.50164e-102	0.535808	0.434	0.04	2.10031e-97	CNT	Shisa4
1.18956e-101	0.582757	0.371	0.029	3.33054e-97	CNT	Tmem45b
4.70548e-101	1.13533	0.944	0.238	1.31744e-96	CNT	Aif1l
1.07794e-100	0.769583	0.636	0.09	3.01802e-96	CNT	Tmem65
1.33822e-100	3.32275	1	0.487	3.74675e-96	CNT	Klk1
7.00258e-100	1.22998	0.965	0.224	1.96058e-95	CNT	Kng2
4.78792e-99	1.18984	0.888	0.2	1.34052e-94	CNT	Hoxd8
1.57525e-98	1.96697	0.993	0.366	4.41038e-94	CNT	Wnk1
2.80837e-98	0.970827	0.881	0.18	7.86288e-94	CNT	Cd9
5.44083e-98	0.725824	0.615	0.084	1.52332e-93	CNT	Bsnd
2.30099e-95	0.813668	0.734	0.122	6.44232e-91	CNT	Hoxb5os
3.12117e-95	3.68027	0.993	0.543	8.73866e-91	CNT	S100g
1.54062e-94	0.918591	0.86	0.168	4.31343e-90	CNT	Clcnkb
1.06057e-93	0.458072	0.399	0.036	2.96937e-89	CNT	Ptgs1
2.89488e-93	0.578039	0.385	0.035	8.10508e-89	CNT	Ybx2
8.45468e-92	0.504288	0.336	0.027	2.36714e-87	CNT	Figf
8.44481e-91	1.35272	0.685	0.117	2.36438e-86	CNT	Sfrp1
2.49914e-90	0.606378	0.42	0.043	6.99709e-86	CNT	Scg5
1.43908e-89	0.854094	0.65	0.111	4.02913e-85	CNT	Pmepa1
3.85058e-89	0.846907	0.846	0.17	1.07808e-84	CNT	Sostdc1
7.09194e-89	2.08153	1	0.609	1.9856e-84	CNT	Spp1
1.00228e-88	0.490328	0.462	0.051	2.8062e-84	CNT	Scn4b
2.73733e-88	0.45097	0.378	0.035	7.66398e-84	CNT	Megf9
1.20255e-86	1.49581	0.881	0.266	3.36689e-82	CNT	Sgms2
1.75493e-85	0.951122	0.769	0.165	4.91346e-81	CNT	Tanc1
2.45619e-85	2.32196	0.972	0.639	6.87683e-81	CNT	Kl
6.83196e-85	1.37712	0.986	0.379	1.91281e-80	CNT	Nudt4
1.2267e-84	0.702942	0.448	0.052	3.43451e-80	CNT	Thbs1
1.91291e-84	0.443223	0.308	0.024	5.35575e-80	CNT	Cldn4
1.86591e-83	0.553877	0.455	0.054	5.22416e-79	CNT	Slc35g1
4.67241e-83	1.04176	0.832	0.205	1.30818e-78	CNT	Cdh1
8.00326e-82	0.553669	0.441	0.052	2.24075e-77	CNT	Slc16a5
5.6233e-81	0.534151	0.399	0.042	1.57441e-76	CNT	Cav1
6.03112e-81	0.519735	0.399	0.042	1.68859e-76	CNT	Trpm6
6.17783e-81	0.762903	0.643	0.11	1.72967e-76	CNT	Pcolce
8.56199e-81	0.942531	0.958	0.225	2.39719e-76	CNT	Tmem213
8.16778e-77	0.717395	0.685	0.127	2.28682e-72	CNT	Krt7
1.02694e-76	0.791421	0.783	0.167	2.87524e-72	CNT	Efhd1
2.75268e-75	0.562166	0.42	0.051	7.70695e-71	CNT	Ddit4l
3.27075e-75	0.474484	0.371	0.039	9.15745e-71	CNT	Cd164l2
4.44292e-75	0.594882	0.629	0.108	1.24393e-70	CNT	Lgals3
1.104e-74	0.413717	0.343	0.034	3.09099e-70	CNT	Oxgr1
3.02636e-73	0.36306	0.308	0.028	8.4732e-69	CNT	Fgfr2
4.52833e-71	0.702151	0.671	0.128	1.26784e-66	CNT	Tmem72
1.12276e-69	0.471525	0.476	0.067	3.14351e-65	CNT	Gata3
1.61277e-69	0.694016	0.594	0.11	4.51543e-65	CNT	Acsl5
3.26684e-69	0.900718	0.741	0.191	9.1465e-65	CNT	Tmprss2
8.00856e-69	0.600335	0.58	0.1	2.24224e-64	CNT	Tfap2b
1.10397e-68	0.589869	0.503	0.077	3.09091e-64	CNT	Atp6v1b1
2.81369e-68	1.1992	1	0.865	7.87778e-64	CNT	Atp1b1
6.06354e-68	0.675646	0.692	0.14	1.69767e-63	CNT	Mecom
2.31453e-67	0.401045	0.378	0.046	6.48022e-63	CNT	Arl15
2.69575e-67	0.493286	0.322	0.034	7.54756e-63	CNT	Ltbp3
6.41438e-67	0.563187	0.49	0.076	1.7959e-62	CNT	Pdk1
1.52488e-66	0.99085	0.839	0.257	4.26935e-62	CNT	Wnk4
5.95159e-66	0.696381	0.692	0.148	1.66632e-61	CNT	Iqgap1
3.00627e-65	1.32608	0.993	0.845	8.41694e-61	CNT	Atp1a1
1.26767e-64	0.441521	0.413	0.056	3.54922e-60	CNT	Sv2a
1.83531e-64	0.463053	0.392	0.051	5.1385e-60	CNT	Sgpp2
2.45644e-64	0.968612	0.86	0.3	6.87755e-60	CNT	Tfcp2l1
4.3939e-64	0.637365	0.594	0.119	1.23021e-59	CNT	Itgb5
4.44292e-63	0.712065	0.685	0.157	1.24393e-58	CNT	Tsc22d2
7.4154e-63	0.370106	0.35	0.041	2.07616e-58	CNT	Syt17
2.19974e-62	0.316948	0.273	0.026	6.15882e-58	CNT	Nr3c2
7.12426e-62	0.510722	0.49	0.08	1.99465e-57	CNT	Sdpr
2.6094e-61	0.600756	0.545	0.103	7.3058e-57	CNT	Ntn4
2.74813e-61	0.437419	0.35	0.043	7.69421e-57	CNT	Kitl
1.47905e-60	0.581735	0.497	0.084	4.14104e-56	CNT	Ckmt1
2.74808e-60	0.343027	0.287	0.029	7.69407e-56	CNT	Vstm2a
1.39013e-59	0.345597	0.273	0.027	3.89208e-55	CNT	Fam234b
1.63828e-59	0.497622	0.434	0.066	4.58686e-55	CNT	Casz1
2.13267e-59	0.556179	0.448	0.073	5.97104e-55	CNT	C77080
3.66312e-59	0.660339	0.601	0.122	1.0256e-54	CNT	Slc16a7
4.95058e-59	0.647343	0.608	0.127	1.38606e-54	CNT	Hoxd9
7.82096e-59	0.766069	0.867	0.239	2.18971e-54	CNT	Pkm
1.39539e-58	0.747724	0.657	0.158	3.90682e-54	CNT	Pbxip1
2.07111e-58	0.550189	0.559	0.106	5.79868e-54	CNT	Hk1
3.19094e-58	0.710378	0.622	0.136	8.93398e-54	CNT	Ier3
1.04926e-57	0.465038	0.364	0.048	2.93771e-53	CNT	Tox3
1.28751e-57	0.808558	1	0.944	3.60477e-53	CNT	Itm2b
3.18834e-57	0.394802	0.336	0.042	8.92673e-53	CNT	Acacb
3.32205e-57	0.475703	0.406	0.062	9.30108e-53	CNT	Inpp5a
4.54752e-57	0.410192	0.364	0.049	1.27322e-52	CNT	Hoxd10
6.71148e-57	0.56752	0.476	0.082	1.87908e-52	CNT	Akr1c19
8.23789e-57	0.36314	0.273	0.028	2.30644e-52	CNT	Sulf2
9.83882e-57	0.490666	0.455	0.075	2.75467e-52	CNT	Slit2
1.92092e-56	0.721972	0.517	0.097	5.37818e-52	CNT	Abca13
3.9559e-56	0.388126	0.35	0.046	1.10757e-51	CNT	Ipcef1
3.99098e-55	0.570161	0.441	0.075	1.11739e-50	CNT	Cyp2j6
2.83691e-54	0.345336	0.252	0.025	7.94279e-50	CNT	Slc4a3
3.84523e-54	0.428114	0.42	0.066	1.07659e-49	CNT	St14
3.9915e-54	0.568836	0.441	0.074	1.11754e-49	CNT	Cwh43
4.2939e-53	0.546102	0.566	0.121	1.20221e-48	CNT	Flnb
4.31378e-53	0.823622	0.804	0.273	1.20777e-48	CNT	Gls
1.50768e-52	0.691805	0.587	0.138	4.22119e-48	CNT	Tbx2
1.6976e-51	0.541816	0.392	0.064	4.75293e-47	CNT	Cnnm2
6.37997e-51	0.896756	0.713	0.214	1.78626e-46	CNT	Cdo1
2.6164e-50	0.719352	0.755	0.242	7.3254e-46	CNT	Acadsb
4.18898e-50	0.460723	0.35	0.053	1.17283e-45	CNT	Tdrd3
5.52451e-50	0.928517	0.818	0.347	1.54675e-45	CNT	Vdr
6.27101e-50	0.603372	0.601	0.146	1.75576e-45	CNT	Rragd
1.28052e-49	0.669024	0.65	0.173	3.5852e-45	CNT	Trim2
2.87046e-49	0.893424	0.979	0.645	8.03671e-45	CNT	Sdc4
9.43282e-49	0.403993	0.287	0.037	2.641e-44	CNT	Tle2
1.10049e-48	0.909246	0.993	0.819	3.08116e-44	CNT	S100a1
4.81672e-48	0.476875	0.476	0.092	1.34859e-43	CNT	Tspan12
9.49512e-48	0.410464	0.811	0.224	2.65844e-43	CNT	Ppp1r1a
3.68679e-47	0.695891	0.629	0.175	1.03223e-42	CNT	Papss1
4.00891e-47	0.64982	0.678	0.196	1.12241e-42	CNT	Emx1
4.02878e-46	0.277432	0.273	0.034	1.12798e-41	CNT	Prdm16
5.63147e-45	0.384199	0.28	0.037	1.5767e-40	CNT	L1cam
1.67428e-44	0.432683	0.364	0.062	4.68765e-40	CNT	Inpp5j
2.76094e-44	0.513728	0.531	0.121	7.73009e-40	CNT	Rap1gap
3.02734e-44	0.652828	0.657	0.191	8.47594e-40	CNT	Ndrg2
1.05177e-43	0.39282	0.378	0.067	2.94475e-39	CNT	Cds1
1.66665e-43	0.789069	1	1	4.6663e-39	CNT	mt-Co1
1.85695e-43	0.836016	0.958	0.603	5.19909e-39	CNT	Cdh16
2.10304e-43	0.602605	0.678	0.204	5.88809e-39	CNT	Cbx5
4.57088e-43	0.626598	0.531	0.132	1.27976e-38	CNT	Tmem178
6.61558e-43	0.585557	0.601	0.16	1.85223e-38	CNT	Prps2
9.05277e-43	0.340495	0.336	0.054	2.53459e-38	CNT	Rap1gap2
1.47631e-42	0.394483	0.287	0.041	4.13337e-38	CNT	Tubb2b
4.25615e-42	0.536475	0.538	0.133	1.19164e-37	CNT	Fzd4
2.91739e-41	0.332106	0.259	0.034	8.16812e-37	CNT	Vav3
5.35362e-41	0.509196	0.615	0.163	1.49891e-36	CNT	Ucp2
6.10133e-41	0.315479	0.336	0.055	1.70825e-36	CNT	B4galt6
1.83618e-40	0.685043	0.769	0.303	5.14095e-36	CNT	Gclc
3.13072e-40	0.479018	0.462	0.104	8.76538e-36	CNT	Laptm4b
3.27214e-40	0.462158	0.503	0.115	9.16134e-36	CNT	Tesc
6.699e-40	0.30977	0.28	0.041	1.87559e-35	CNT	Sptbn2
9.83144e-40	0.565083	0.692	0.212	2.75261e-35	CNT	Gbas
1.7056e-39	0.382555	0.28	0.041	4.77534e-35	CNT	Sall3
6.63185e-39	0.347483	0.385	0.073	1.85679e-34	CNT	Ak1
9.22367e-39	0.422831	0.378	0.074	2.58244e-34	CNT	Cyb5rl
1.00816e-38	0.368989	0.336	0.06	2.82265e-34	CNT	Spire1
1.11849e-38	0.68881	0.909	0.47	3.13155e-34	CNT	Serinc3
1.15656e-38	0.775994	0.93	0.541	3.23815e-34	CNT	Ctsd
1.63301e-38	0.681617	0.65	0.211	4.5721e-34	CNT	Adgrg1
1.64646e-38	0.345831	0.294	0.046	4.60977e-34	CNT	Pygb
3.04397e-38	0.673854	0.636	0.203	8.52251e-34	CNT	Wsb1
3.56719e-38	0.41711	0.385	0.076	9.98743e-34	CNT	Ildr1
4.25628e-38	0.750812	0.867	0.446	1.19167e-33	CNT	Rtn3
4.74512e-38	0.612062	0.797	0.314	1.32854e-33	CNT	Ctnna1
4.92297e-38	0.391705	0.371	0.072	1.37833e-33	CNT	Micall1
6.78622e-38	0.397847	0.392	0.081	1.90001e-33	CNT	Iqgap2
7.61856e-38	0.553552	0.594	0.172	2.13304e-33	CNT	Nfe2l1
1.09973e-37	0.713501	0.937	0.615	3.07903e-33	CNT	Atp6v1a
2.02124e-37	0.658192	0.727	0.274	5.65906e-33	CNT	Nampt
2.6284e-37	0.449865	0.545	0.137	7.359e-33	CNT	Mt2
3.66915e-37	0.532454	0.531	0.143	1.02729e-32	CNT	Stard8
4.06318e-37	0.568803	0.636	0.201	1.13761e-32	CNT	Lman1
8.02917e-37	0.692194	0.839	0.347	2.24801e-32	CNT	Txnip
1.12163e-36	0.321198	0.308	0.052	3.14033e-32	CNT	Sorbs2
1.14155e-36	0.269955	0.343	0.065	3.19612e-32	CNT	Aqp2
1.61583e-36	0.462642	0.839	0.325	4.524e-32	CNT	Sh3bgrl3
3.3393e-36	0.338885	0.343	0.063	9.34938e-32	CNT	Itpkb
7.73704e-36	0.517289	0.93	0.453	2.16622e-31	CNT	Mt1
9.27894e-36	0.41944	0.329	0.062	2.59792e-31	CNT	Fam3c
9.86487e-36	0.466491	0.559	0.153	2.76197e-31	CNT	Pou3f3
3.60854e-35	0.316376	0.336	0.063	1.01032e-30	CNT	Tes
4.52553e-35	0.341112	0.336	0.063	1.26706e-30	CNT	Sfxn3
9.937e-35	0.426131	0.545	0.144	2.78216e-30	CNT	Epcam
1.08513e-34	1.3601	0.587	0.201	3.03816e-30	CNT	Slc12a3
2.53564e-34	0.572434	1	1	7.09928e-30	CNT	mt-Co3
3.13995e-34	0.329225	0.329	0.063	8.79125e-30	CNT	Slc45a4
7.14285e-34	0.34199	0.287	0.051	1.99986e-29	CNT	Sowahc
7.98031e-34	0.436649	0.434	0.104	2.23433e-29	CNT	Tubb2a
8.45121e-34	0.644272	0.846	0.425	2.36617e-29	CNT	Aplp2
1.09649e-33	0.434172	0.406	0.096	3.06995e-29	CNT	Pomgnt1
3.8399e-33	0.302923	0.273	0.046	1.07509e-28	CNT	Slc44a2
7.57854e-33	0.585697	1	0.997	2.12184e-28	CNT	mt-Co2
7.91451e-33	0.605368	1	0.955	2.2159e-28	CNT	mt-Nd3
3.17281e-32	0.355897	0.329	0.066	8.88324e-28	CNT	Gal3st1
5.54416e-32	0.435251	0.455	0.117	1.55225e-27	CNT	Gsta4
6.17328e-32	0.344001	0.378	0.083	1.72839e-27	CNT	Pls3
1.18807e-31	0.311775	0.301	0.057	3.32635e-27	CNT	Gca
1.58271e-31	0.422425	0.294	0.055	4.43127e-27	CNT	Aebp1
1.65502e-31	0.675472	0.972	0.675	4.63373e-27	CNT	Atp6v0e
1.77828e-31	0.368092	0.35	0.074	4.97884e-27	CNT	Cldn7
2.58174e-31	0.493602	0.629	0.22	7.22835e-27	CNT	Hnrnpa0
5.99207e-31	0.511107	0.503	0.146	1.67766e-26	CNT	Col18a1
7.30912e-31	0.443104	0.385	0.091	2.04641e-26	CNT	Ccdc28b
1.34364e-30	0.315446	0.287	0.053	3.76193e-26	CNT	Tspan15
1.6048e-30	0.342303	0.252	0.044	4.49312e-26	CNT	Ddx26b
1.82872e-30	0.282304	0.266	0.047	5.12005e-26	CNT	Dusp18
2.25543e-30	0.646931	0.909	0.578	6.31474e-26	CNT	Kcnj16
3.19471e-30	0.339028	0.469	0.123	8.94456e-26	CNT	Tspan8
3.52434e-30	0.301622	0.294	0.057	9.86745e-26	CNT	N4bp2
4.17381e-30	0.380277	0.406	0.101	1.16858e-25	CNT	Adcy6
6.95705e-30	0.289987	0.301	0.06	1.94784e-25	CNT	Dach1
1.39581e-29	0.276952	0.259	0.045	3.90799e-25	CNT	Sort1
2.07005e-29	0.546974	0.664	0.257	5.79573e-25	CNT	Zmiz1
2.17232e-29	0.433558	0.427	0.113	6.08205e-25	CNT	Clstn1
3.04166e-29	0.388992	0.972	0.541	8.51605e-25	CNT	Ly6a
4.02886e-29	0.620143	0.776	0.389	1.128e-24	CNT	Cnn3
5.29623e-29	0.322878	0.266	0.049	1.48284e-24	CNT	Mfsd7b
1.34934e-28	0.371836	0.287	0.058	3.77789e-24	CNT	Frk
2.74756e-28	0.338402	0.329	0.074	7.69262e-24	CNT	Tmx4
3.22072e-28	0.291102	0.301	0.061	9.01738e-24	CNT	Fads6
6.0105e-28	0.558774	0.636	0.25	1.68282e-23	CNT	Npnt
6.39711e-28	0.658255	0.811	0.446	1.79106e-23	CNT	Wls
1.16442e-27	0.459672	0.531	0.169	3.26014e-23	CNT	Bcat2
1.83198e-27	0.450879	0.455	0.132	5.12918e-23	CNT	Tgfbr1
2.55369e-27	0.28066	0.28	0.057	7.14982e-23	CNT	Aph1b
5.20501e-27	0.340717	0.392	0.101	1.4573e-22	CNT	Smim5
5.80081e-27	0.609768	0.832	0.466	1.62411e-22	CNT	Col4a4
6.85455e-27	0.279851	0.294	0.061	1.91914e-22	CNT	Epn3
1.49962e-26	0.44719	0.42	0.12	4.19864e-22	CNT	Yap1
2.06163e-26	0.468254	1	1	5.77216e-22	CNT	mt-Atp6
2.22625e-26	0.497182	0.755	0.325	6.23305e-22	CNT	Acss1
3.86056e-26	0.27527	0.378	0.093	1.08088e-21	CNT	Tnfaip2
4.64931e-26	0.537853	0.629	0.252	1.30171e-21	CNT	Plxnb2
1.48928e-25	0.296979	0.273	0.058	4.16969e-21	CNT	Slc9a2
1.52771e-25	0.319913	0.357	0.09	4.27729e-21	CNT	Dlgap4
1.60875e-25	0.299374	0.315	0.072	4.50418e-21	CNT	Slc1a5
1.79188e-25	0.274696	0.301	0.066	5.01691e-21	CNT	Mal2
4.61574e-25	0.439269	1	0.999	1.29232e-20	CNT	mt-Cytb
6.01457e-25	0.30039	0.336	0.082	1.68396e-20	CNT	Galnt18
6.51082e-25	0.291833	0.294	0.065	1.8229e-20	CNT	Kctd1
7.02745e-25	0.279293	0.441	0.121	1.96755e-20	CNT	Mfsd4
1.09912e-24	0.303614	0.315	0.073	3.07731e-20	CNT	Stk39
1.44292e-24	0.508396	0.699	0.32	4.03988e-20	CNT	Itgav
2.92522e-24	0.448965	0.566	0.21	8.19002e-20	CNT	Ptbp3
4.40153e-24	0.501143	0.804	0.393	1.23234e-19	CNT	Hadhb
6.31649e-24	0.392042	0.441	0.137	1.76849e-19	CNT	Slc25a12
7.07523e-24	0.507905	0.497	0.179	1.98092e-19	CNT	Hif1a
1.03907e-23	0.457007	0.497	0.177	2.90918e-19	CNT	Enpp5
2.3981e-23	0.446978	0.636	0.262	6.7142e-19	CNT	Pkhd1
4.77404e-23	0.398937	0.49	0.171	1.33664e-18	CNT	Ddr1
5.67705e-23	0.38846	0.434	0.137	1.58946e-18	CNT	Anxa4
1.25213e-22	0.355433	0.252	0.055	3.5057e-18	CNT	Tmem30b
2.08004e-22	0.392845	0.923	0.609	5.8237e-18	CNT	Cst3
2.18002e-22	0.501214	0.58	0.243	6.10361e-18	CNT	Clint1
2.875e-22	0.543495	0.755	0.394	8.04942e-18	CNT	Cpt1a
4.10428e-22	0.316593	0.357	0.098	1.14912e-17	CNT	Isyna1
6.92267e-22	0.309174	0.301	0.076	1.93821e-17	CNT	Tmem50b
9.46196e-22	0.514951	0.958	0.889	2.64916e-17	CNT	mt-Nd4l
1.2699e-21	0.448942	0.538	0.216	3.55548e-17	CNT	Ddx6
1.52935e-21	0.410444	0.587	0.235	4.28187e-17	CNT	Tmx2
1.55594e-21	0.275631	0.28	0.067	4.35632e-17	CNT	Kcnk1
1.87264e-21	0.252529	0.315	0.081	5.24303e-17	CNT	Cyb561
3.53938e-21	0.498235	0.629	0.279	9.90957e-17	CNT	Cited2
3.90643e-21	0.494207	0.685	0.31	1.09372e-16	CNT	Chka
5.32517e-21	0.274137	0.308	0.078	1.49094e-16	CNT	Rab25
7.54018e-21	0.447053	0.958	0.768	2.1111e-16	CNT	Psap
7.74506e-21	0.46643	0.49	0.192	2.16846e-16	CNT	Maged1
8.08823e-21	0.413222	0.629	0.271	2.26454e-16	CNT	Atp6ap1
1.36393e-20	0.255187	0.287	0.073	3.81872e-16	CNT	Sema5a
1.71244e-20	0.29629	0.427	0.135	4.79449e-16	CNT	Cd82
1.86821e-20	0.300651	0.301	0.081	5.23061e-16	CNT	Fgfr1
2.85911e-20	0.334296	0.49	0.173	8.00492e-16	CNT	Arl6ip5
4.72191e-20	0.402256	0.629	0.268	1.32204e-15	CNT	F11r
2.33712e-19	0.327058	0.42	0.142	6.54348e-15	CNT	Slc35a1
2.46671e-19	0.295202	0.329	0.094	6.9063e-15	CNT	Anxa6
2.87513e-19	0.29405	0.524	0.194	8.04979e-15	CNT	Anxa5
3.05215e-19	0.307252	0.364	0.114	8.5454e-15	CNT	Aff1
4.99661e-19	0.473182	1	0.838	1.39895e-14	CNT	Atp6v1f
5.20319e-19	0.26229	0.28	0.073	1.45679e-14	CNT	Pvrl2
5.94004e-19	0.383166	0.587	0.249	1.66309e-14	CNT	Rad21
8.68292e-19	0.3321	0.524	0.206	2.43104e-14	CNT	Anxa11
1.37876e-18	0.306813	0.294	0.082	3.86025e-14	CNT	Piezo1
1.6341e-18	0.256318	0.301	0.082	4.57516e-14	CNT	Ssbp4
1.67655e-18	0.254376	0.308	0.088	4.69399e-14	CNT	Spred1
1.94038e-18	0.368632	0.399	0.134	5.43269e-14	CNT	Hes1
1.94178e-18	0.352474	0.343	0.11	5.43658e-14	CNT	Peli2
2.78498e-18	0.339912	0.587	0.253	7.79738e-14	CNT	Etnk1
2.94812e-18	0.352747	0.308	0.091	8.25416e-14	CNT	Smtnl2
2.99208e-18	0.404418	0.545	0.229	8.37721e-14	CNT	Tmem135
3.01218e-18	0.320951	0.371	0.122	8.4335e-14	CNT	Bag4
4.5112e-18	0.339931	0.573	0.235	1.26304e-13	CNT	Ccdc141
5.60272e-18	0.400545	0.385	0.132	1.56865e-13	CNT	Tuba1c
6.68972e-18	0.339462	0.42	0.149	1.87299e-13	CNT	Hoxd3os1
8.42344e-18	0.581685	0.874	0.683	2.35839e-13	CNT	Pth1r
1.06232e-17	0.275296	0.301	0.087	2.97428e-13	CNT	Tmcc3
1.6938e-17	0.253053	0.266	0.071	4.74229e-13	CNT	Tpd52l1
2.68674e-17	0.251383	0.259	0.069	7.52232e-13	CNT	Pfkm
3.06995e-17	0.446983	0.643	0.316	8.59525e-13	CNT	Ppargc1a
3.69373e-17	0.288932	0.427	0.155	1.03417e-12	CNT	Pias2
4.10972e-17	0.30143	0.399	0.141	1.15064e-12	CNT	Pja2
4.84339e-17	0.404851	0.622	0.297	1.35605e-12	CNT	Magt1
5.08859e-17	0.264363	0.273	0.076	1.4247e-12	CNT	Dock7
5.63241e-17	0.450162	0.587	0.278	1.57696e-12	CNT	Wwc1
6.70397e-17	0.346465	0.399	0.142	1.87698e-12	CNT	Cyp2j11
7.96116e-17	0.395647	0.469	0.19	2.22897e-12	CNT	Dag1
1.75681e-16	0.323791	0.385	0.136	4.91871e-12	CNT	Klhdc7a
1.85647e-16	0.331931	0.629	0.297	5.19774e-12	CNT	Cyfip2
1.90786e-16	0.39752	0.615	0.298	5.34161e-12	CNT	Chmp4b
2.45696e-16	0.401573	0.448	0.183	6.87899e-12	CNT	Rnf152
2.54442e-16	0.31174	0.378	0.133	7.12386e-12	CNT	Fam234a
2.92089e-16	0.317814	1	0.997	8.17792e-12	CNT	mt-Nd4
3.27886e-16	0.309435	0.448	0.172	9.18016e-12	CNT	Spint1
8.15044e-16	0.409832	0.664	0.351	2.28196e-11	CNT	Tm9sf2
9.26476e-16	0.271213	0.287	0.086	2.59395e-11	CNT	Twsg1
9.4731e-16	0.292782	0.427	0.162	2.65228e-11	CNT	Slc38a10
1.33381e-15	0.344299	0.524	0.218	3.7344e-11	CNT	P3h2
1.7499e-15	0.372315	0.608	0.286	4.89937e-11	CNT	Ptprf
2.15157e-15	0.326178	0.559	0.25	6.02395e-11	CNT	Atp6v1h
3.47073e-15	0.303209	0.392	0.145	9.71734e-11	CNT	Ano6
3.5134e-15	0.336879	0.399	0.156	9.83681e-11	CNT	Jarid2
3.69454e-15	0.311764	0.629	0.295	1.0344e-10	CNT	Paqr5
4.87405e-15	0.3326	0.608	0.289	1.36464e-10	CNT	Tmed7
6.1514e-15	0.440023	0.874	0.672	1.72227e-10	CNT	Aco2
8.01132e-15	0.313789	0.42	0.165	2.24301e-10	CNT	Nbeal1
1.07678e-14	0.252226	0.259	0.078	3.01477e-10	CNT	Hip1r
1.29877e-14	0.351561	0.748	0.415	3.6363e-10	CNT	Pgrmc1
1.32186e-14	0.371421	0.49	0.22	3.70095e-10	CNT	Sptan1
2.06869e-14	0.314994	0.427	0.17	5.79191e-10	CNT	Plekha1
2.17557e-14	0.298014	1	0.99	6.09117e-10	CNT	mt-Nd2
2.57683e-14	0.374283	0.587	0.298	7.2146e-10	CNT	Usp2
2.96957e-14	0.408291	0.643	0.348	8.3142e-10	CNT	Vegfa
3.04147e-14	0.30761	0.42	0.166	8.51552e-10	CNT	Vamp2
3.10322e-14	0.262728	0.252	0.076	8.68838e-10	CNT	Slc2a1
3.97834e-14	0.293793	1	0.999	1.11385e-09	CNT	mt-Nd1
4.13716e-14	0.289107	0.385	0.149	1.15832e-09	CNT	Cab39l
5.47947e-14	0.312425	0.462	0.193	1.53414e-09	CNT	Tmem116
5.76761e-14	0.269253	0.35	0.129	1.61482e-09	CNT	Dapk1
6.17251e-14	0.25502	0.273	0.087	1.72818e-09	CNT	Pgap1
6.57448e-14	0.292769	0.413	0.168	1.84072e-09	CNT	Adam9
7.29872e-14	0.352295	0.916	0.735	2.0435e-09	CNT	Aes
7.43755e-14	0.315249	0.65	0.334	2.08237e-09	CNT	Phldb2
8.33999e-14	0.348209	0.559	0.277	2.33503e-09	CNT	Erbb2ip
1.4947e-13	0.309024	0.462	0.203	4.18486e-09	CNT	Pip4k2c
1.83027e-13	0.336233	0.734	0.399	5.1244e-09	CNT	Oat
1.94447e-13	0.26152	0.448	0.185	5.44412e-09	CNT	Sorl1
1.99758e-13	0.28828	0.308	0.109	5.59283e-09	CNT	Tmem94
2.29238e-13	0.29074	0.497	0.219	6.41821e-09	CNT	Arf3
2.67064e-13	0.317334	0.678	0.356	7.47724e-09	CNT	Serinc1
3.04327e-13	0.259789	0.294	0.101	8.52055e-09	CNT	Sec14l1
3.08035e-13	0.267423	0.315	0.112	8.62436e-09	CNT	Slc27a1
3.36745e-13	0.333755	0.448	0.199	9.4282e-09	CNT	Gstt3
3.59045e-13	0.37381	0.909	0.696	1.00525e-08	CNT	Ivns1abp
7.01099e-13	0.318947	0.476	0.216	1.96294e-08	CNT	Impad1
7.54441e-13	0.361211	0.909	0.726	2.11228e-08	CNT	Sdha
8.22655e-13	0.390163	0.769	0.551	2.30327e-08	CNT	Ogdh
8.2885e-13	0.299255	0.49	0.225	2.32061e-08	CNT	Smco4
8.8736e-13	0.270448	0.266	0.088	2.48443e-08	CNT	Pla2g16
9.32519e-13	0.304772	0.455	0.199	2.61087e-08	CNT	Elovl7
9.92993e-13	0.375498	0.776	0.504	2.78018e-08	CNT	Ezr
1.0137e-12	0.358877	0.476	0.225	2.83815e-08	CNT	Mccc1
1.12564e-12	0.26939	0.322	0.119	3.15157e-08	CNT	Ypel5
1.22792e-12	0.346937	0.748	0.452	3.43792e-08	CNT	Tmem106b
1.27102e-12	0.298994	0.804	0.522	3.55859e-08	CNT	Laptm4a
1.40307e-12	0.260967	0.287	0.1	3.92832e-08	CNT	Cog7
2.50926e-12	0.395439	0.594	0.313	7.02543e-08	CNT	Trabd2b
2.78483e-12	0.259088	0.448	0.198	7.79697e-08	CNT	Aig1
2.84909e-12	0.304875	0.587	0.303	7.97687e-08	CNT	Mtch1
3.55551e-12	0.334611	0.643	0.342	9.95472e-08	CNT	Idh3a
4.80239e-12	0.266408	0.343	0.137	1.34457e-07	CNT	Tbc1d14
4.8364e-12	0.304385	0.65	0.332	1.3541e-07	CNT	Ccnd1
5.07873e-12	0.299507	0.364	0.152	1.42194e-07	CNT	Cpq
6.73572e-12	0.269544	0.951	0.929	1.88587e-07	CNT	Atp5a1
8.06172e-12	0.276273	0.336	0.133	2.25712e-07	CNT	Ttc3
8.45666e-12	0.271494	0.406	0.178	2.3677e-07	CNT	Nucb1
1.28428e-11	0.315695	0.629	0.356	3.59574e-07	CNT	Copa
1.69422e-11	0.351107	0.86	0.577	4.74348e-07	CNT	Hsp90b1
2.0444e-11	0.288751	0.566	0.291	5.72391e-07	CNT	Sdf4
2.21241e-11	0.254139	0.287	0.108	6.1943e-07	CNT	Hspa4l
2.43292e-11	0.326717	0.308	0.123	6.81169e-07	CNT	Ptprj
3.94418e-11	0.287829	0.462	0.22	1.10429e-06	CNT	Wdr1
4.09694e-11	0.31595	0.503	0.256	1.14706e-06	CNT	Cobll1
6.12177e-11	0.257458	0.524	0.259	1.71397e-06	CNT	Atp6ap2
8.20985e-11	0.334721	0.58	0.332	2.29859e-06	CNT	Bicc1
8.3143e-11	0.314413	0.678	0.402	2.32784e-06	CNT	Pura
8.56429e-11	0.295202	0.476	0.242	2.39783e-06	CNT	Pacsin2
1.37316e-10	0.25952	0.392	0.176	3.84458e-06	CNT	Ago2
1.51956e-10	0.359058	0.483	0.247	4.25447e-06	CNT	Arfgef1
1.66756e-10	0.332846	0.79	0.534	4.66884e-06	CNT	Ppib
1.84864e-10	0.28862	0.357	0.159	5.17582e-06	CNT	Fpgs
2.02716e-10	0.258845	0.476	0.229	5.67563e-06	CNT	Pigq
2.58251e-10	0.311809	0.49	0.259	7.23052e-06	CNT	Clmn
3.47684e-10	0.283952	0.35	0.154	9.73446e-06	CNT	Creb3l2
4.40855e-10	0.260506	0.441	0.215	1.23431e-05	CNT	Atrx
4.81237e-10	0.310392	0.636	0.366	1.34737e-05	CNT	Hnrnph1
4.99404e-10	0.252815	0.455	0.22	1.39823e-05	CNT	Trp53inp2
5.53058e-10	0.256897	0.399	0.187	1.54845e-05	CNT	Sacm1l
7.10347e-10	0.262415	0.364	0.159	1.98883e-05	CNT	Pcyox1
7.60569e-10	0.292294	0.825	0.564	2.12944e-05	CNT	Calm2
8.66033e-10	0.298089	0.713	0.458	2.42472e-05	CNT	Got2
9.34062e-10	0.26212	0.972	0.878	2.61519e-05	CNT	Aldoa
1.19614e-09	0.307415	0.476	0.253	3.34894e-05	CNT	Pigp
1.20602e-09	0.350868	0.573	0.352	3.37661e-05	CNT	Msi2
1.2169e-09	0.263719	0.636	0.363	3.40708e-05	CNT	Wbp5
1.36935e-09	0.2709	0.524	0.277	3.8339e-05	CNT	Bcap31
1.41604e-09	0.260326	0.322	0.141	3.96464e-05	CNT	Tns3
1.51066e-09	0.264588	0.552	0.296	4.22954e-05	CNT	Rpn1
1.56792e-09	0.284159	0.51	0.274	4.38986e-05	CNT	Itga6
2.04344e-09	0.257284	0.427	0.209	5.72122e-05	CNT	Nfat5
2.62098e-09	0.286857	0.895	0.693	7.33822e-05	CNT	Atp6v1e1
2.65924e-09	0.32466	0.678	0.425	7.44535e-05	CNT	Abhd17c
2.79413e-09	0.258411	0.441	0.221	7.82299e-05	CNT	Xbp1
6.06373e-09	0.296685	0.531	0.3	0.000169772	CNT	Rnf128
7.77401e-09	0.263562	0.413	0.202	0.000217657	CNT	Dek
1.29187e-08	0.278453	0.427	0.223	0.000361699	CNT	Wwc2
1.30418e-08	0.252388	0.322	0.149	0.000365145	CNT	Fam20b
1.71354e-08	0.262228	0.769	0.521	0.000479757	CNT	Uqcc2
1.78363e-08	0.312287	0.832	0.633	0.000499382	CNT	Canx
2.1485e-08	0.256884	0.538	0.311	0.000601536	CNT	Kif5b
4.49862e-08	0.285646	0.538	0.31	0.00125952	CNT	Pkig
5.09337e-08	0.255152	0.839	0.611	0.00142604	CNT	Tmem59
1.01344e-07	0.287856	0.832	0.569	0.00283744	CNT	Pet100
1.07364e-07	0.276216	0.846	0.677	0.00300597	CNT	Ghitm
1.25944e-07	0.27437	0.79	0.551	0.00352619	CNT	Rabac1
1.33919e-07	0.261105	0.552	0.326	0.00374946	CNT	Pum2
1.72383e-07	0.277902	0.594	0.377	0.00482638	CNT	Actn4
2.23815e-07	0.275678	0.517	0.313	0.00626638	CNT	Pccb
1.7323e-05	0.268645	0.706	0.534	0.48501	CNT	Gm42418
0	2.99518	0.977	0.132	0	DCT	Slc12a3
0	2.39884	0.998	0.273	0	DCT	Defb1
0	2.24422	0.711	0.02	0	DCT	Pvalb
0	2.22651	0.99	0.318	0	DCT	Wnk1
0	2.18375	0.995	0.141	0	DCT	Tmem52b
0	1.98219	0.921	0.099	0	DCT	Pgam2
0	1.9056	0.979	0.162	0	DCT	Ppp1r1a
0	1.74899	0.957	0.168	0	DCT	Tmem213
0	1.68431	0.977	0.411	0	DCT	Mt1
0	1.60698	0.785	0.063	0	DCT	Sfrp1
0	1.5718	0.953	0.167	0	DCT	Kng2
0	1.52709	0.928	0.204	0	DCT	Egf
0	1.52399	0.699	0.091	0	DCT	Ier3
0	1.51328	0.865	0.191	0	DCT	Wfdc15b
0	1.46889	0.887	0.189	0	DCT	Pkm
0	1.46499	0.889	0.133	0	DCT	Kcnj1
0	1.4164	0.69	0.039	0	DCT	Ptgfr
0	1.4001	0.809	0.115	0	DCT	Clu
0	1.39407	0.738	0.113	0	DCT	Ckb
0	1.38666	0.822	0.153	0	DCT	Hoxd8
0	1.38327	0.751	0.152	0	DCT	Emx1
0	1.34792	0.666	0.049	0	DCT	Abca13
0	1.34286	0.823	0.214	0	DCT	Wnk4
0	1.2451	0.699	0.078	0	DCT	Hoxb5os
0	1.22504	0.701	0.075	0	DCT	Slc16a7
0	1.21752	0.646	0.096	0	DCT	Mt2
0	1.20981	0.849	0.154	0	DCT	Mal
0	1.15797	0.78	0.123	0	DCT	Clcnkb
0	1.11796	0.551	0.034	0	DCT	Cwh43
0	1.05265	0.654	0.088	0	DCT	Tmem72
0	1.00821	0.756	0.127	0	DCT	Sostdc1
0	0.994671	0.473	0.017	0	DCT	Uroc1
0	0.972317	0.59	0.074	0	DCT	Pcolce
0	0.965084	0.683	0.108	0	DCT	Cldn8
0	0.953689	0.603	0.08	0	DCT	Mfsd4
0	0.778066	0.394	0.011	0	DCT	Sall3
0	0.750887	0.376	0.017	0	DCT	Trpm6
4.49524e-306	1.36933	0.815	0.225	1.25858e-301	DCT	Sgms2
3.95294e-303	0.699832	0.376	0.023	1.10675e-298	DCT	Tox3
4.64497e-299	1.52875	0.997	0.833	1.3005e-294	DCT	Atp1a1
5.71502e-297	0.990265	0.715	0.127	1.60009e-292	DCT	Efhd1
1.93791e-294	1.17544	0.895	0.269	5.42575e-290	DCT	Umod
9.80258e-294	1.04983	0.617	0.089	2.74453e-289	DCT	Scd2
1.09736e-280	1.06604	0.561	0.085	3.07238e-276	DCT	Lhx1
3.10682e-275	0.634589	0.344	0.021	8.69847e-271	DCT	Rab27a
1.27553e-272	1.04127	0.78	0.162	3.57122e-268	DCT	Wfdc2
2.54674e-256	0.884975	0.605	0.099	7.13037e-252	DCT	Scnn1a
5.80347e-254	0.851197	0.521	0.071	1.62486e-249	DCT	Kcnj10
7.57395e-250	0.975044	0.605	0.106	2.12056e-245	DCT	Mecom
3.10873e-242	0.798867	0.539	0.081	8.70383e-238	DCT	Tesc
1.75284e-232	0.555219	0.267	0.013	4.90759e-228	DCT	Cables1
1.10857e-231	1.00991	0.997	0.855	3.10377e-227	DCT	Atp1b1
2.78731e-224	0.778666	0.386	0.041	7.8039e-220	DCT	Atp4a
8.25384e-217	1.4968	0.641	0.151	2.31091e-212	DCT	Calb1
3.22935e-216	0.613222	0.362	0.036	9.04153e-212	DCT	Fads6
3.33182e-214	0.597127	0.314	0.026	9.32844e-210	DCT	Cadps2
3.82312e-211	0.53465	0.262	0.015	1.0704e-206	DCT	Klhl3
2.43786e-207	0.753206	0.445	0.067	6.82552e-203	DCT	Tmem65
2.24237e-206	0.936575	0.987	0.806	6.27818e-202	DCT	S100a1
[truncated: 5,879 more rows]

## Sheet: 1hr_markers
p-value	avg_logFC	pct.1	pct.2	p_val_adj	cluster	gene
0	1.77488	0.987	0.473	0	S1	Gatm
0	1.41783	0.705	0.168	0	S1	Spp2
0	1.39191	0.666	0.188	0	S1	Hmox1
0	1.32318	0.429	0.068	0	S1	Car3
0	1.21774	1	0.993	0	S1	Gpx3
0	1.17364	0.588	0.117	0	S1	Slc5a2
0	1.12755	0.547	0.113	0	S1	Slc5a12
0	1.04033	0.805	0.442	0	S1	Maf
0	0.939453	0.382	0.036	0	S1	D630023F18Rik
0	0.911488	0.805	0.465	0	S1	Idh1
0	0.729649	0.956	0.766	0	S1	Ndrg1
6.87882e-294	1.04293	0.536	0.161	1.92593e-289	S1	Slc6a19
1.74076e-292	0.644804	0.999	0.994	4.87378e-288	S1	Ftl1
3.3439e-290	1.07368	0.43	0.089	9.36226e-286	S1	Cyp24a1
1.30308e-282	0.951091	0.734	0.399	3.64838e-278	S1	Lgmn
1.52099e-280	1.1023	0.554	0.181	4.25846e-276	S1	Gsta2
1.07502e-250	0.87733	0.425	0.105	3.00985e-246	S1	Slc7a8
4.01282e-247	0.901271	0.638	0.305	1.12351e-242	S1	Nox4
3.90556e-240	0.815843	0.679	0.316	1.09348e-235	S1	Car2
2.00006e-231	0.782984	0.394	0.095	5.59978e-227	S1	Slc7a7
8.20505e-230	0.825872	0.82	0.559	2.29725e-225	S1	Slc4a4
1.34911e-228	0.756935	0.878	0.693	3.77723e-224	S1	Mif
3.04102e-222	0.762539	0.315	0.055	8.51424e-218	S1	Cyp2d26
8.65777e-211	0.733563	0.35	0.079	2.424e-206	S1	Gldc
9.3673e-211	0.754511	0.781	0.473	2.62266e-206	S1	Cela1
1.0637e-209	0.682855	0.928	0.675	2.97814e-205	S1	Ass1
3.58439e-209	0.907897	0.344	0.077	1.00356e-204	S1	Snhg11
4.79874e-199	0.841504	0.387	0.108	1.34355e-194	S1	Etv1
3.60014e-193	0.612162	0.881	0.743	1.00797e-188	S1	Atp6v1g1
3.56701e-179	0.534396	0.902	0.717	9.98692e-175	S1	Pdzk1ip1
1.98578e-178	0.641252	0.904	0.734	5.55979e-174	S1	Gm10116
1.17027e-173	0.710173	0.404	0.124	3.27652e-169	S1	Fabp3
4.18538e-162	0.521847	0.972	0.855	1.17182e-157	S1	Akr1a1
2.34623e-148	0.590191	0.283	0.07	6.56898e-144	S1	Prodh2
2.03826e-143	0.705732	0.429	0.179	5.70673e-139	S1	Asl
5.34088e-142	0.683888	0.495	0.239	1.49534e-137	S1	Slc2a2
1.79638e-139	0.571853	0.809	0.578	5.02951e-135	S1	Fut9
7.84375e-137	0.539297	0.931	0.741	2.19609e-132	S1	Tmem27
5.21065e-135	0.457231	0.974	0.8	1.45888e-130	S1	Aldob
7.52403e-134	0.590607	0.712	0.501	2.10658e-129	S1	Dab2
3.15752e-131	0.678039	0.525	0.278	8.84041e-127	S1	1700016C15Rik
1.13129e-125	0.470306	0.92	0.727	3.16738e-121	S1	Miox
8.18386e-124	0.612118	0.723	0.503	2.29132e-119	S1	Tnfaip8
1.03261e-122	0.553906	0.327	0.109	2.89111e-118	S1	Acss1
3.81151e-122	0.453707	0.937	0.744	1.06715e-117	S1	Slc34a1
4.62368e-122	0.5019	0.845	0.657	1.29454e-117	S1	Errfi1
5.15973e-122	0.579598	0.289	0.088	1.44462e-117	S1	Cpn1
6.21566e-116	0.608787	0.628	0.412	1.74026e-111	S1	Dcxr
1.04325e-112	0.542714	0.668	0.467	2.92089e-108	S1	Nus1
1.72545e-112	0.592122	0.315	0.112	4.83092e-108	S1	Ccdc141
2.70366e-112	0.563194	0.694	0.508	7.56972e-108	S1	Comt
1.98983e-108	0.499204	0.749	0.54	5.57112e-104	S1	Pah
1.01806e-107	0.607617	0.551	0.332	2.85037e-103	S1	Enpp2
5.28823e-98	0.759091	0.315	0.126	1.4806e-93	S1	Fam13a
1.72518e-95	0.598396	0.61	0.423	4.83017e-91	S1	Slc25a4
4.62689e-95	0.346144	0.301	0.109	1.29544e-90	S1	Apoe
8.57934e-92	0.567456	0.332	0.144	2.40204e-87	S1	Folh1
2.4083e-90	0.580332	0.362	0.167	6.74276e-86	S1	Acaa2
1.72456e-87	0.513238	0.333	0.141	4.82844e-83	S1	Car12
1.48715e-86	0.416202	0.747	0.569	4.16372e-82	S1	Pdzk1
4.52241e-86	0.536553	0.332	0.149	1.26618e-81	S1	Steap2
1.58534e-84	0.511997	0.28	0.111	4.43863e-80	S1	Alpl
4.57162e-80	0.484929	0.655	0.481	1.27996e-75	S1	Igfbp4
2.54401e-76	0.420511	0.677	0.488	7.12273e-72	S1	Polr3e
3.38175e-76	0.491939	0.309	0.139	9.46823e-72	S1	Atxn1
2.41889e-74	0.304604	0.957	0.914	6.77241e-70	S1	Atp5g1
8.14894e-72	0.573288	0.282	0.126	2.28154e-67	S1	Cpeb3
1.20824e-71	0.432361	0.704	0.564	3.38282e-67	S1	Pcbd1
1.59921e-71	0.475319	0.602	0.435	4.47747e-67	S1	Ethe1
1.9479e-71	0.619838	0.334	0.164	5.45372e-67	S1	8430408G22Rik
3.0465e-70	0.351918	0.732	0.589	8.52958e-66	S1	Oxct1
4.30402e-70	0.423275	0.754	0.576	1.20504e-65	S1	Fbp1
2.90492e-68	0.383094	0.32	0.149	8.13321e-64	S1	Cotl1
5.64665e-68	0.484775	0.472	0.304	1.58095e-63	S1	Rab11fip3
5.69808e-67	0.423193	0.695	0.561	1.59535e-62	S1	Herpud1
2.33853e-65	0.383028	0.732	0.576	6.54741e-61	S1	Glyat
2.57872e-64	0.436134	0.302	0.144	7.2199e-60	S1	Plk3
1.61598e-63	0.5478	0.485	0.329	4.52442e-59	S1	Ank3
6.0036e-61	0.300815	0.406	0.216	1.68089e-56	S1	Oat
9.10781e-61	0.429254	0.385	0.22	2.55e-56	S1	Tceal8
2.0743e-60	0.439501	0.288	0.134	5.80761e-56	S1	Ccnd1
2.38817e-60	0.458889	0.325	0.17	6.68641e-56	S1	Slc3a2
2.16145e-57	0.345561	0.74	0.598	6.05163e-53	S1	Sord
1.03062e-56	0.313646	0.439	0.253	2.88552e-52	S1	Sepw1
1.35738e-56	0.410729	0.595	0.459	3.80038e-52	S1	Qdpr
6.32243e-56	0.479482	0.333	0.184	1.77015e-51	S1	Rcan1
1.05468e-55	0.298704	0.895	0.851	2.95288e-51	S1	Atox1
1.44918e-54	0.565442	0.739	0.686	4.05741e-50	S1	Neat1
3.15327e-53	0.457235	0.296	0.159	8.82852e-49	S1	Mpp1
6.69425e-53	0.409806	0.487	0.343	1.87426e-48	S1	Fmo1
1.09852e-52	0.445955	0.484	0.349	3.07563e-48	S1	Fam134b
1.61489e-52	0.252647	0.948	0.901	4.52136e-48	S1	2010107E04Rik
5.192e-52	0.315151	0.868	0.795	1.45366e-47	S1	Park7
1.02207e-49	0.485011	0.419	0.283	2.86159e-45	S1	Itch
5.18399e-49	0.408256	0.269	0.14	1.45141e-44	S1	Tmem106a
5.48373e-49	0.44474	0.37	0.232	1.53534e-44	S1	Prodh
6.04859e-49	0.399388	0.252	0.126	1.69348e-44	S1	Slc6a8
1.88746e-47	0.45376	0.346	0.21	5.28451e-43	S1	Kif12
3.52136e-47	0.448195	0.386	0.247	9.85912e-43	S1	Frmd4b
2.96468e-46	0.436336	0.382	0.242	8.3005e-42	S1	Gm5424
2.11978e-44	0.399714	0.407	0.273	5.93497e-40	S1	Cryl1
6.56625e-44	0.29992	0.54	0.376	1.83842e-39	S1	Dnase1
9.8472e-44	0.400287	0.338	0.205	2.75702e-39	S1	Nabp1
4.55948e-42	0.261406	0.891	0.826	1.27656e-37	S1	Hint1
3.06934e-41	0.431995	0.258	0.142	8.59354e-37	S1	Col27a1
7.34403e-41	0.406495	0.298	0.178	2.05618e-36	S1	Ptprd
3.35808e-39	0.414797	0.624	0.538	9.40196e-35	S1	Rsrp1
5.07733e-39	0.409326	0.336	0.217	1.42155e-34	S1	Lipa
5.33541e-39	0.366501	0.261	0.144	1.49381e-34	S1	Slc43a2
2.49524e-38	0.369983	0.453	0.33	6.98618e-34	S1	Atp6v1b2
5.02771e-37	0.317017	0.64	0.532	1.40766e-32	S1	Glul
6.86477e-37	0.43073	0.305	0.187	1.922e-32	S1	Chka
1.83226e-36	0.37903	0.47	0.354	5.12995e-32	S1	Ascc1
2.95934e-36	0.403028	0.428	0.314	8.28555e-32	S1	Neu1
5.55582e-34	0.27504	0.382	0.249	1.55552e-29	S1	Wbp5
6.50736e-34	0.346544	0.501	0.391	1.82193e-29	S1	Abcg2
1.73983e-33	0.301312	0.639	0.503	4.87116e-29	S1	G6pc
3.70412e-33	0.34252	0.471	0.363	1.03708e-28	S1	Dao
4.84258e-33	0.290657	0.558	0.445	1.35582e-28	S1	Sfxn1
7.65862e-33	0.361824	0.283	0.175	2.14426e-28	S1	Ppp2r3a
9.34673e-30	0.343764	0.311	0.207	2.6169e-25	S1	Aldh7a1
5.12087e-29	0.404632	0.302	0.202	1.43374e-24	S1	Snx29
5.24263e-29	0.306366	0.259	0.159	1.46783e-24	S1	Wdfy3
7.94263e-29	0.337874	0.301	0.201	2.22378e-24	S1	Hsd3b2
5.29581e-28	0.301228	0.274	0.173	1.48272e-23	S1	Car14
3.79122e-27	0.433827	0.445	0.349	1.06147e-22	S1	Slc13a1
4.7561e-26	0.441012	0.386	0.304	1.33161e-21	S1	Gm42418
2.60619e-25	0.264334	0.573	0.486	7.29681e-21	S1	Sephs2
6.57844e-25	0.26669	0.319	0.217	1.84183e-20	S1	Ppargc1a
6.95329e-25	0.326271	0.417	0.329	1.94678e-20	S1	Ctsl
4.28457e-24	0.284461	0.507	0.432	1.19959e-19	S1	Bpnt1
3.25824e-23	0.307583	0.275	0.189	9.12242e-19	S1	Rgl1
5.56767e-23	0.294165	0.276	0.187	1.55884e-18	S1	Acaa1a
5.87569e-23	0.284799	0.262	0.174	1.64507e-18	S1	Tkt
9.04222e-23	0.260856	0.56	0.471	2.53164e-18	S1	Nme2
2.25847e-22	0.304177	0.525	0.456	6.32326e-18	S1	Atp2a2
6.53873e-22	0.311098	0.302	0.219	1.83071e-17	S1	Epn1
9.18419e-22	0.27945	0.393	0.313	2.57139e-17	S1	Abhd17c
1.07169e-21	0.27567	0.357	0.267	3.00053e-17	S1	Irf2bp2
1.48338e-21	0.250664	0.544	0.47	4.15316e-17	S1	Smim1
5.169e-21	0.382394	0.987	0.989	1.44722e-16	S1	Malat1
6.41387e-21	0.299428	0.303	0.219	1.79575e-16	S1	Ap2a2
1.31826e-20	0.290289	0.272	0.19	3.69086e-16	S1	Smim24
2.48763e-20	0.336849	0.442	0.361	6.96486e-16	S1	Aspa
2.57687e-20	0.271816	0.366	0.279	7.21472e-16	S1	Slc37a4
5.63704e-20	0.334481	0.302	0.228	1.57826e-15	S1	Mfsd1
2.76864e-19	0.250205	0.251	0.169	7.75164e-15	S1	Cox7a1
1.08582e-18	0.276195	0.255	0.178	3.04007e-14	S1	Igsf11
5.00686e-18	0.25438	0.298	0.22	1.40182e-13	S1	Ppm1h
5.34403e-18	0.251829	0.294	0.217	1.49622e-13	S1	Nr1h4
6.11942e-18	0.258893	0.502	0.432	1.71332e-13	S1	Gstm5
1.08161e-17	0.279632	0.565	0.504	3.0283e-13	S1	Srsf2
1.13466e-17	0.285772	0.346	0.275	3.17683e-13	S1	Cpeb4
4.39964e-17	0.272734	0.255	0.184	1.23181e-12	S1	Tango2
2.19257e-16	0.258422	0.405	0.334	6.13876e-12	S1	Selenbp1
2.48455e-14	0.26001	0.361	0.298	6.95624e-10	S1	Gcsh
1.30207e-12	0.255334	0.305	0.249	3.64553e-08	S1	Evi5
3.53985e-12	0.268022	0.271	0.216	9.91087e-08	S1	Slc25a36
7.18911e-181	0.785094	0.979	0.746	2.01281e-176	S2	Miox
6.69281e-138	0.626839	0.957	0.707	1.87385e-133	S2	Ass1
6.50801e-118	0.635137	0.821	0.511	1.82211e-113	S2	Cela1
4.63112e-116	0.409645	1	0.995	1.29662e-111	S2	Ftl1
1.68748e-105	0.504274	0.981	0.79	4.72461e-101	S2	Guca2b
1.69589e-98	0.48339	0.983	0.793	4.74814e-94	S2	Akr1c21
5.63919e-91	0.480965	0.984	0.867	1.57886e-86	S2	Cyb5a
3.54396e-90	0.276404	1	0.994	9.92237e-86	S2	Gpx3
5.53508e-89	0.463475	0.994	0.923	1.54971e-84	S2	Dbi
3.1219e-87	0.440041	0.983	0.87	8.74069e-83	S2	Akr1a1
3.92287e-86	0.290375	0.907	0.558	1.09832e-81	S2	Gatm
1.77944e-85	0.363526	1	0.981	4.98206e-81	S2	Fxyd2
1.1958e-76	0.368263	0.999	0.924	3.34801e-72	S2	Gpx1
1.5012e-76	0.432229	0.984	0.823	4.20306e-72	S2	Aldob
1.62487e-66	0.404124	0.958	0.764	4.54932e-62	S2	Ttc36
2.01372e-66	0.410918	0.771	0.518	5.638e-62	S2	Idh1
4.79627e-65	0.376012	0.982	0.919	1.34286e-60	S2	Cycs
3.1265e-64	0.409839	0.92	0.756	8.75358e-60	S2	Gm10116
1.13003e-61	0.487454	0.418	0.196	3.16386e-57	S2	Slc22a8
2.69997e-58	0.384371	0.965	0.828	7.55937e-54	S2	Hrsp12
4.39855e-57	0.467427	0.695	0.459	1.23151e-52	S2	Pecr
4.9317e-57	0.450124	0.73	0.508	1.38078e-52	S2	Polr3e
3.79213e-56	0.385559	0.958	0.83	1.06172e-51	S2	Hspe1
3.75874e-55	0.39074	0.842	0.653	1.05237e-50	S2	Khk
4.75843e-54	0.469402	0.675	0.447	1.33226e-49	S2	RP23-306P12.2
3.79975e-52	0.351986	0.893	0.654	1.06385e-47	S2	Acy3
3.17542e-50	0.382065	0.965	0.896	8.89055e-46	S2	Ybx1
9.22888e-49	0.351957	0.897	0.78	2.5839e-44	S2	Cisd1
4.08334e-48	0.387846	0.868	0.712	1.14325e-43	S2	Hist1h2bc
1.30027e-47	0.44764	0.653	0.452	3.64051e-43	S2	Ethe1
4.78737e-47	0.400679	0.711	0.482	1.34037e-42	S2	Inmt
1.77433e-46	0.322878	0.909	0.712	4.96776e-42	S2	Keg1
2.17297e-46	0.319592	0.944	0.777	6.08389e-42	S2	Pck1
9.26305e-45	0.422926	0.454	0.252	2.59347e-40	S2	Gm5424
1.48209e-44	0.324794	0.915	0.831	4.14957e-40	S2	Hint1
9.6936e-42	0.317257	0.97	0.863	2.71401e-37	S2	Atpif1
1.62868e-40	0.353116	0.832	0.706	4.55999e-36	S2	Hint2
1.89615e-40	0.320192	0.906	0.8	5.30883e-36	S2	Park7
8.47626e-40	0.361873	0.724	0.529	2.37318e-35	S2	Cml1
1.05226e-39	0.360646	0.749	0.569	2.94611e-35	S2	Msrb1
4.33806e-38	0.250325	0.985	0.917	1.21457e-33	S2	Gpx4
4.43647e-38	0.361924	0.775	0.622	1.24212e-33	S2	Ddt
1.24498e-37	0.39939	0.752	0.631	3.4857e-33	S2	Tsc22d1
1.837e-36	0.349291	0.775	0.598	5.14325e-32	S2	Fbp1
3.13217e-36	0.29218	0.867	0.765	8.76944e-32	S2	Atp6v1g1
1.00987e-35	0.372614	0.632	0.468	2.82743e-31	S2	Smim1
3.16593e-35	0.387373	0.647	0.472	8.86397e-31	S2	Nme2
3.79723e-35	0.33709	0.817	0.713	1.06315e-30	S2	Tmem256
6.6037e-35	0.287387	0.94	0.868	1.8489e-30	S2	Mpc1
6.80878e-35	0.320718	0.981	0.941	1.90632e-30	S2	Prdx1
3.03549e-34	0.778256	0.365	0.21	8.49877e-30	S2	Ttr
3.1239e-34	0.297525	0.816	0.636	8.7463e-30	S2	Calml4
7.19681e-34	0.347064	0.605	0.427	2.01496e-29	S2	Gstm5
9.95705e-33	0.356444	0.668	0.499	2.78778e-28	S2	Tmem252
1.46991e-32	0.375196	0.427	0.263	4.11546e-28	S2	Hao2
2.54582e-32	0.301711	0.76	0.595	7.12778e-28	S2	Glyat
3.18079e-32	0.375314	0.637	0.469	8.90557e-28	S2	Bdh2
6.52704e-32	0.34528	0.773	0.613	1.82744e-27	S2	Sord
2.0487e-31	0.438571	0.513	0.353	5.73595e-27	S2	Slc13a1
2.45417e-31	0.324159	0.745	0.6	6.87119e-27	S2	Dnajc19
4.03165e-31	0.263809	0.582	0.381	1.12878e-26	S2	Car2
1.32812e-30	0.330515	0.321	0.17	3.71847e-26	S2	Car12
1.68201e-28	0.40962	0.383	0.231	4.7093e-24	S2	Apom
2.18195e-28	0.28238	0.738	0.571	6.10903e-24	S2	Pah
2.61321e-28	0.266421	0.967	0.926	7.31648e-24	S2	Ubb
3.77006e-28	0.346423	0.457	0.301	1.05554e-23	S2	Aspdh
1.70433e-27	0.288443	0.722	0.547	4.77179e-23	S2	RP24-64C6.3
5.60056e-27	0.255596	0.912	0.824	1.56804e-22	S2	Ndufb4
5.87802e-27	0.292366	0.714	0.559	1.64573e-22	S2	0610011F06Rik
8.47316e-27	0.3326	0.413	0.254	2.37231e-22	S2	Gsta2
1.46777e-26	0.28207	0.773	0.648	4.10947e-22	S2	Nme1
1.26961e-25	0.304602	0.571	0.395	3.55466e-21	S2	Dnase1
6.54365e-25	0.326398	0.655	0.516	1.83209e-20	S2	Gm10053
1.10166e-24	0.257838	0.346	0.203	3.08441e-20	S2	Ppp1r16b
4.02582e-24	0.347008	0.441	0.3	1.12715e-19	S2	Erich4
5.76235e-24	0.300223	0.514	0.364	1.61334e-19	S2	Ascc1
7.72025e-24	0.334303	0.496	0.35	2.16151e-19	S2	Dhrs4
8.8641e-24	0.302939	0.801	0.69	2.48177e-19	S2	Etfb
1.08734e-23	0.28238	0.405	0.263	3.04434e-19	S2	G0s2
3.19559e-23	0.297861	0.598	0.456	8.94701e-19	S2	Sfxn1
3.24136e-23	0.331937	0.502	0.364	9.07515e-19	S2	BC026585
1.67934e-22	0.2666	0.677	0.541	4.70181e-18	S2	Tnfaip8
2.69089e-22	0.279349	0.789	0.689	7.53395e-18	S2	Txn1
4.35235e-22	0.258386	0.646	0.5	1.21857e-17	S2	Cldn10
4.64291e-22	0.263937	0.485	0.336	1.29992e-17	S2	Ces1f
8.97377e-22	0.326271	0.496	0.363	2.51248e-17	S2	Cryz
1.31532e-21	0.288079	0.673	0.554	3.68262e-17	S2	Mrpl12
3.7172e-21	0.30882	0.621	0.483	1.04074e-16	S2	Cda
6.97124e-21	0.353529	0.28	0.165	1.95181e-16	S2	RP23-306P12.3
1.50251e-20	0.284868	0.599	0.469	4.20673e-16	S2	Pter
4.37148e-20	0.287089	0.636	0.507	1.22393e-15	S2	Txndc17
5.29813e-20	0.25428	0.704	0.584	1.48337e-15	S2	Pcbd1
6.90317e-20	0.321725	0.444	0.316	1.93275e-15	S2	Cmbl
8.27475e-20	0.35007	0.488	0.37	2.31676e-15	S2	Gstp1
1.03775e-19	0.253885	0.605	0.477	2.9055e-15	S2	Qdpr
2.79755e-19	0.294565	0.362	0.239	7.83258e-15	S2	Nit2
6.96579e-19	0.261181	0.506	0.377	1.95028e-14	S2	Cks2
3.63939e-18	0.264232	0.261	0.155	1.01896e-13	S2	Prr5
1.2436e-17	0.272935	0.295	0.184	3.48183e-13	S2	Car14
2.02277e-17	0.290152	0.449	0.328	5.66335e-13	S2	Smim22
7.29401e-17	0.273657	0.524	0.401	2.04218e-12	S2	Msra
6.09737e-16	0.258158	0.49	0.376	1.70714e-11	S2	Iah1
1.05446e-15	0.289989	0.428	0.319	2.95227e-11	S2	Tcea3
1.97638e-15	0.265462	0.319	0.218	5.53346e-11	S2	Mkrn1
3.71896e-15	0.376389	0.359	0.254	1.04123e-10	S2	Pde4d
4.32882e-14	0.262958	0.524	0.407	1.21198e-09	S2	Slc22a28
2.48138e-12	0.265004	0.414	0.321	6.94736e-08	S2	2300009A05Rik
2.88404e-12	0.252382	0.267	0.182	8.07472e-08	S2	Npm3
6.60386e-12	0.263202	0.28	0.192	1.84895e-07	S2	4430402I18Rik
8.44289e-12	0.254336	0.58	0.489	2.36384e-07	S2	Slirp
1.35492e-11	0.256306	0.363	0.273	3.7935e-07	S2	Slc25a10
6.76389e-11	0.262553	0.287	0.204	1.89375e-06	S2	Tmem37
0	1.67803	1	0.942	0	S3	Kap
0	1.49761	0.694	0.07	0	S3	Slco1a1
0	1.48681	0.981	0.472	0	S3	Cndp2
0	1.40227	0.814	0.163	0	S3	Slc7a13
0	1.29268	0.951	0.424	0	S3	Cyp4b1
0	1.2631	0.988	0.606	0	S3	Slc27a2
0	1.25348	0.899	0.382	0	S3	Lpl
0	1.24569	0.851	0.284	0	S3	Cyp2e1
0	1.16038	0.718	0.16	0	S3	Cd36
0	1.15918	0.885	0.331	0	S3	Nudt19
0	1.12907	0.722	0.163	0	S3	Nat8
0	1.10234	0.767	0.244	0	S3	Atp11a
0	1.0949	0.97	0.533	0	S3	Acy3
0	1.07989	0.654	0.119	0	S3	Slc5a8
0	1.04988	0.738	0.191	0	S3	Slc22a6
0	1.03713	0.793	0.233	0	S3	Mep1a
0	1.0141	0.628	0.132	0	S3	Tmigd1
0	1.01032	0.686	0.145	0	S3	Acsm3
0	1.00131	0.845	0.335	0	S3	Inmt
0	0.983869	0.865	0.354	0	S3	Slc22a12
0	0.908432	0.797	0.3	0	S3	Ggt1
0	0.884052	0.854	0.396	0	S3	Ghr
0	0.872017	0.56	0.138	0	S3	Agps
0	0.870356	0.829	0.395	0	S3	Ugt3a2
0	0.869779	0.731	0.319	0	S3	Slc22a30
0	0.861316	0.735	0.251	0	S3	Slc17a3
0	0.850689	0.976	0.729	0	S3	Chpt1
0	0.834763	0.989	0.682	0	S3	Ttc36
0	0.809104	0.867	0.448	0	S3	Ugt2b38
0	0.799753	0.488	0.085	0	S3	Gm11128
0	0.782456	0.538	0.132	0	S3	Eci3
0	0.764269	0.609	0.184	0	S3	Ugt3a1
0	0.752511	0.728	0.211	0	S3	Napsa
0	0.750994	0.598	0.179	0	S3	Car4
0	0.727982	0.992	0.823	0	S3	Cyb5a
0	0.723601	0.693	0.226	0	S3	Mpv17l
0	0.695011	0.975	0.717	0	S3	Acsm2
0	0.675401	0.989	0.721	0	S3	Guca2b
0	0.611882	0.982	0.815	0	S3	Sepp1
0	0.450928	1	0.999	0	S3	Fth1
7.48586e-307	0.811285	0.853	0.535	2.09589e-302	S3	Odc1
3.62151e-305	0.750437	0.489	0.111	1.01395e-300	S3	Slc6a18
2.28261e-304	0.742831	0.55	0.15	6.39085e-300	S3	Slc13a3
1.35042e-303	0.744498	0.63	0.215	3.7809e-299	S3	Ehhadh
7.66886e-302	0.735961	0.659	0.237	2.14713e-297	S3	Ldhd
1.88744e-300	0.74075	0.648	0.235	5.28446e-296	S3	Pank1
8.97147e-297	0.720294	0.631	0.21	2.51183e-292	S3	Ces1f
5.69363e-296	0.509463	0.998	0.9	1.5941e-291	S3	Gpx1
3.20503e-289	0.657702	0.89	0.504	8.97344e-285	S3	Cyp2j5
2.12655e-279	0.763538	0.626	0.23	5.95391e-275	S3	Slco1a6
6.12637e-276	0.6735	0.764	0.352	1.71526e-271	S3	Slc17a1
3.63833e-273	0.816037	0.72	0.331	1.01866e-268	S3	Defb29
1.68462e-271	0.761343	0.69	0.292	4.71659e-267	S3	Tmem205
4.22292e-265	0.586409	1	0.846	1.18233e-260	S3	Spink1
3.9522e-259	0.669115	0.794	0.447	1.10654e-254	S3	Acox1
7.96576e-251	0.63973	0.592	0.21	2.23025e-246	S3	Ak4
7.89024e-249	0.694528	0.805	0.421	2.20911e-244	S3	Cml1
6.80885e-235	0.637685	0.618	0.242	1.90634e-230	S3	BC021785
2.98191e-232	0.651958	0.583	0.219	8.34876e-228	S3	Amacr
1.68158e-226	0.592571	0.752	0.368	4.70809e-222	S3	Cda
6.52451e-225	0.584398	0.82	0.471	1.82673e-220	S3	Msrb1
5.22751e-221	0.632172	0.522	0.178	1.4636e-216	S3	Acaa1b
3.13316e-217	0.526498	0.983	0.772	8.77222e-213	S3	Hrsp12
2.26543e-216	0.579069	0.812	0.441	6.34275e-212	S3	RP24-64C6.3
7.62447e-211	0.588364	0.644	0.284	2.1347e-206	S3	Me1
1.69185e-210	0.548789	0.919	0.624	4.73684e-206	S3	Lrp2
1.37327e-208	0.561241	0.398	0.102	3.84487e-204	S3	D630029K05Rik
2.59151e-208	0.639153	0.778	0.428	7.2557e-204	S3	Tmem176a
1.19122e-203	0.382236	0.862	0.457	3.33517e-199	S3	Ly6a
3.73716e-202	0.570332	0.797	0.456	1.04633e-197	S3	Dnajc12
9.18784e-202	0.487005	0.941	0.722	2.57241e-197	S3	H2afj
1.13713e-200	0.503427	0.323	0.064	3.18374e-196	S3	Bhmt2
9.74569e-197	0.528479	0.895	0.562	2.7286e-192	S3	Khk
3.37143e-196	0.432439	0.961	0.801	9.43933e-192	S3	Rps27l
1.23652e-194	0.47383	0.981	0.73	3.46201e-190	S3	Akr1c21
2.99195e-193	0.393577	0.993	0.89	8.37685e-189	S3	Gpx4
1.95289e-190	0.547112	0.819	0.515	5.46771e-186	S3	Cat
8.53149e-189	0.55146	0.424	0.129	2.38865e-184	S3	Cyp2j13
1.61629e-182	0.574385	0.388	0.114	4.52529e-178	S3	Hsd17b11
1.12935e-181	0.565744	0.337	0.084	3.16196e-177	S3	Cyp4a10
1.45283e-181	0.553639	0.503	0.189	4.06763e-177	S3	Adh1
1.50189e-181	0.552107	0.619	0.284	4.20499e-177	S3	Aass
1.16501e-177	0.520599	0.779	0.45	3.26179e-173	S3	Ccdc107
2.15264e-176	0.475584	0.336	0.082	6.02697e-172	S3	Slc22a2
1.65573e-174	0.443625	0.949	0.719	4.63572e-170	S3	Pck1
2.21271e-174	0.476696	0.328	0.08	6.19515e-170	S3	Ggct
2.26801e-174	0.460784	0.272	0.05	6.34996e-170	S3	Gm27216
5.90443e-173	0.444594	0.314	0.072	1.65312e-168	S3	Fmo5
1.52624e-172	0.416653	0.997	0.898	4.27318e-168	S3	Dbi
2.23206e-170	0.408195	0.966	0.763	6.24931e-166	S3	Scp2
2.72874e-170	0.416809	0.267	0.049	7.63993e-166	S3	Akr1c14
2.86972e-170	0.523091	0.643	0.313	8.03463e-166	S3	Slc47a1
1.26758e-169	0.509554	0.4	0.126	3.54897e-165	S3	Serpinf2
1.01822e-168	0.511748	0.632	0.306	2.8508e-164	S3	Hykk
1.58698e-168	0.515866	0.682	0.362	4.44322e-164	S3	Lypla1
7.41547e-168	0.505459	0.793	0.505	2.07618e-163	S3	Aldh6a1
1.89253e-167	0.434305	0.974	0.825	5.29872e-163	S3	Atpif1
1.10774e-166	0.496064	0.478	0.176	3.10145e-162	S3	Them7
5.09982e-165	0.512697	0.464	0.173	1.42785e-160	S3	Papss2
2.975e-164	0.296659	0.479	0.176	8.3294e-160	S3	Aqp1
1.04564e-163	0.472017	0.797	0.477	2.92758e-159	S3	Gk
7.90893e-163	0.41408	0.773	0.465	2.21434e-158	S3	Acadm
2.53914e-162	0.380867	0.996	0.917	7.10908e-158	S3	Prdx5
3.88645e-162	0.416796	0.931	0.635	1.08813e-157	S3	Keg1
1.2654e-160	0.49497	0.46	0.168	3.54287e-156	S3	Cyp4a31
1.42757e-160	0.477863	0.491	0.194	3.99691e-156	S3	Crot
1.08429e-159	0.513948	0.46	0.171	3.03581e-155	S3	Cgref1
1.8542e-159	0.434728	0.337	0.092	5.1914e-155	S3	Acot12
7.66678e-157	0.501986	0.684	0.366	2.14655e-152	S3	Gclm
3.8574e-155	0.502112	0.5	0.202	1.07999e-150	S3	Reep5
3.04854e-153	0.464786	0.421	0.145	8.53531e-149	S3	Fitm1
1.6031e-152	0.475945	0.631	0.311	4.48836e-148	S3	Slc22a28
8.65912e-151	0.48662	0.656	0.348	2.42438e-146	S3	Fam195a
3.3257e-150	0.483782	0.402	0.139	9.3113e-146	S3	Mettl7b
4.94653e-148	0.477175	0.396	0.136	1.38493e-143	S3	Cd302
9.97503e-148	0.466623	0.55	0.248	2.79281e-143	S3	Lap3
1.53514e-146	0.367381	0.969	0.828	4.29809e-142	S3	Mpc1
6.23585e-146	0.426441	0.86	0.553	1.74591e-141	S3	Calml4
2.07258e-145	0.434346	0.364	0.115	5.80282e-141	S3	Slco3a1
2.38982e-144	0.373948	0.967	0.782	6.69101e-140	S3	Hspe1
6.3658e-144	0.502634	0.741	0.438	1.7823e-139	S3	Tmem176b
2.22473e-143	0.473379	0.451	0.176	6.2288e-139	S3	Gchfr
5.69276e-142	0.57613	0.803	0.607	1.59386e-137	S3	Zbtb20
1.65427e-141	0.467494	0.684	0.385	4.63164e-137	S3	Sod1
5.93713e-141	0.411929	0.733	0.409	1.66228e-136	S3	Tmem252
2.19431e-140	0.425071	0.864	0.613	6.14364e-136	S3	Zfp706
1.58078e-135	0.468981	0.531	0.244	4.42585e-131	S3	Nhp2
1.03557e-133	0.416302	0.683	0.367	2.89939e-129	S3	Pth1r
7.13991e-132	0.446961	0.348	0.115	1.99903e-127	S3	Trim7
4.74012e-131	0.420477	0.459	0.188	1.32714e-126	S3	Tmem174
7.936e-131	0.401013	0.313	0.093	2.22192e-126	S3	B4galt5
2.65427e-130	0.45107	0.479	0.209	7.43143e-126	S3	Ephx2
1.12786e-129	0.416064	0.734	0.44	3.1578e-125	S3	Kcnj15
1.07186e-127	0.433263	0.695	0.394	3.00101e-123	S3	Galnt11
1.53016e-127	0.431511	0.545	0.263	4.28415e-123	S3	Tnfrsf21
3.26469e-126	0.414665	0.334	0.109	9.14048e-122	S3	Proc
3.72884e-126	0.332527	0.955	0.706	1.044e-121	S3	Slc34a1
5.33151e-126	0.417644	0.378	0.14	1.49272e-121	S3	Tmem189
9.21114e-124	0.45984	0.552	0.271	2.57894e-119	S3	Dhrs4
1.22621e-123	0.406889	0.387	0.146	3.43314e-119	S3	Gm15638
7.76791e-122	0.296392	0.999	0.948	2.17486e-117	S3	Ndufa4
1.24231e-121	0.442705	0.449	0.192	3.47821e-117	S3	Cideb
3.10583e-121	0.425765	0.543	0.265	8.6957e-117	S3	2310039H08Rik
1.27718e-120	0.432148	0.355	0.13	3.57586e-116	S3	Csad
2.51308e-120	0.389049	0.785	0.494	7.03613e-116	S3	4931406C07Rik
7.58374e-120	0.380267	0.908	0.724	2.1233e-115	S3	Arpp19
6.1463e-119	0.4051	0.673	0.382	1.72084e-114	S3	Gas2
9.8719e-119	0.433699	0.765	0.481	2.76393e-114	S3	0610011F06Rik
9.66497e-117	0.357244	0.256	0.069	2.706e-112	S3	RP24-362L9.2
1.28837e-116	0.380698	0.262	0.074	3.60718e-112	S3	Lipo1
1.51904e-116	0.383675	0.712	0.415	4.25301e-112	S3	Lactb2
2.27376e-116	0.418576	0.47	0.209	6.36609e-112	S3	Kcnk5
1.82432e-114	0.597927	0.725	0.532	5.10773e-110	S3	Mat2a
6.9562e-113	0.380196	0.858	0.619	1.9476e-108	S3	Txn1
1.1092e-112	0.422	0.47	0.22	3.10553e-108	S3	Macrod2
1.85393e-112	0.341513	0.325	0.112	5.19064e-108	S3	Aadat
1.49766e-111	0.384953	0.678	0.389	4.19315e-107	S3	Folr1
6.51961e-111	0.413769	0.678	0.389	1.82536e-106	S3	Pecr
6.66013e-110	0.399402	0.39	0.16	1.8647e-105	S3	Entpd5
3.63812e-108	0.398156	0.431	0.194	1.0186e-103	S3	Wwp1
8.39073e-108	0.369448	0.473	0.216	2.34924e-103	S3	Hpn
1.58305e-107	0.397792	0.57	0.304	4.43222e-103	S3	Csrp2
1.80504e-107	0.367142	0.663	0.376	5.05375e-103	S3	RP23-306P12.2
3.0945e-107	0.394323	0.662	0.394	8.66397e-103	S3	C1d
4.95076e-107	0.383122	0.317	0.112	1.38611e-102	S3	Slc51b
6.95063e-107	0.384664	0.898	0.658	1.94604e-102	S3	Cyba
1.08515e-106	0.393568	0.591	0.325	3.03821e-102	S3	Far1
1.90697e-106	0.364702	0.701	0.412	5.33913e-102	S3	Gcnt1
8.42006e-106	0.384898	0.45	0.207	2.35745e-101	S3	Fam213a
2.31832e-104	0.32537	0.917	0.668	6.49084e-100	S3	Sult1d1
6.00286e-104	0.358898	0.269	0.087	1.68068e-99	S3	AI317395
1.91266e-103	0.385853	0.556	0.292	5.35508e-99	S3	Thoc7
2.82009e-103	0.434402	0.401	0.172	7.89569e-99	S3	Acox3
6.76093e-101	0.310693	0.708	0.418	1.89293e-96	S3	Cldn10
1.70097e-100	0.346271	0.258	0.081	4.76239e-96	S3	Tpmt
5.80682e-100	0.348113	0.455	0.214	1.62579e-95	S3	Gstz1
1.03634e-99	0.356383	0.398	0.173	2.90153e-95	S3	Cmtm6
1.35313e-99	0.37262	0.666	0.395	3.78849e-95	S3	Snhg18
1.99078e-99	0.394981	0.727	0.472	5.57377e-95	S3	Med28
2.84538e-99	0.406435	0.308	0.112	7.9665e-95	S3	RP23-306P12.3
4.28831e-99	0.372783	0.327	0.125	1.20064e-94	S3	Susd3
8.44432e-98	0.337886	0.395	0.171	2.36424e-93	S3	Fhl1
1.1628e-97	0.362505	0.554	0.29	3.2556e-93	S3	BC026585
2.09454e-96	0.373495	0.624	0.364	5.8643e-92	S3	Bphl
5.32732e-96	0.361415	0.574	0.313	1.49154e-91	S3	Grina
1.32516e-94	0.324341	0.896	0.718	3.71019e-90	S3	Mrps21
2.55734e-94	0.335465	0.357	0.147	7.16003e-90	S3	Tef
4.2405e-94	0.378418	0.57	0.314	1.18726e-89	S3	Lrpap1
4.02092e-92	0.375434	0.464	0.229	1.12578e-87	S3	Slc22a18
4.05618e-92	0.307698	0.82	0.593	1.13565e-87	S3	Sat1
4.56506e-92	0.366288	0.57	0.32	1.27813e-87	S3	Mlec
6.35871e-92	0.31825	0.287	0.104	1.78031e-87	S3	St8sia1
1.93213e-91	0.353302	0.413	0.191	5.40956e-87	S3	Sod3
2.40029e-90	0.359678	0.754	0.513	6.72033e-86	S3	Hibadh
4.99034e-90	0.33573	0.326	0.131	1.3972e-85	S3	Slc16a2
6.77382e-90	0.317538	0.788	0.529	1.89653e-85	S3	Dnajc19
2.36125e-89	0.3251	0.377	0.164	6.61103e-85	S3	Slc1a1
3.09793e-89	0.337173	0.31	0.123	8.67359e-85	S3	Coasy
6.01843e-89	0.332559	0.414	0.193	1.68504e-84	S3	Adhfe1
6.88884e-89	0.314244	0.312	0.122	1.92874e-84	S3	Slc6a20b
7.88988e-89	0.347187	0.323	0.131	2.20901e-84	S3	Lpin1
1.03222e-88	0.412331	0.387	0.178	2.89002e-84	S3	Apom
1.62711e-88	0.370065	0.699	0.451	4.55559e-84	S3	G6pc
5.89528e-88	0.336746	0.328	0.133	1.65056e-83	S3	Slc18a1
1.41137e-87	0.322964	0.328	0.135	3.95155e-83	S3	Paqr9
2.32152e-87	0.359685	0.432	0.211	6.49979e-83	S3	Fah
4.35802e-87	0.344467	0.503	0.264	1.22016e-82	S3	Abhd14b
1.10268e-86	0.302226	0.289	0.108	3.0873e-82	S3	Mfap3l
1.335e-86	0.345001	0.344	0.147	3.73773e-82	S3	Tmem37
7.52486e-86	0.315776	0.35	0.15	2.10681e-81	S3	Cth
1.48724e-85	0.328832	0.318	0.13	4.16397e-81	S3	Pxmp4
3.75464e-84	0.336312	0.41	0.197	1.05122e-79	S3	Nit1
3.87613e-84	0.341334	0.82	0.615	1.08524e-79	S3	Tmbim6
1.7068e-83	0.324933	0.352	0.155	4.7787e-79	S3	Haao
2.24982e-83	0.361928	0.663	0.415	6.29904e-79	S3	Acat1
3.32896e-83	0.33861	0.263	0.096	9.32042e-79	S3	Ddit4
1.37962e-82	0.345711	0.627	0.379	3.86266e-78	S3	Stra13
1.49042e-82	0.330493	0.513	0.276	4.17288e-78	S3	Fuca1
7.58813e-82	0.351917	0.755	0.522	2.12452e-77	S3	Tmbim4
1.25361e-81	0.334117	0.298	0.12	3.50985e-77	S3	Pxmp2
3.98611e-81	0.353383	0.638	0.399	1.11603e-76	S3	Smim4
1.34547e-80	0.349647	0.327	0.141	3.76704e-76	S3	Mlxipl
3.43682e-80	0.337915	0.715	0.477	9.62241e-76	S3	Mien1
4.72403e-80	0.290119	0.467	0.238	1.32263e-75	S3	Itgb8
8.04046e-80	0.30133	0.66	0.401	2.25117e-75	S3	Bdh2
1.25381e-79	0.3361	0.498	0.274	3.51041e-75	S3	Smarca2
1.2861e-79	0.318691	0.306	0.126	3.60082e-75	S3	Slc3a1
1.58329e-79	0.289132	0.937	0.781	4.43288e-75	S3	Ndufb4
1.45707e-78	0.32054	0.782	0.544	4.07949e-74	S3	Tcn2
3.02157e-78	0.295403	0.26	0.097	8.45979e-74	S3	Slc16a4
9.69252e-78	0.320374	0.733	0.496	2.71371e-73	S3	Usp50
1.90417e-77	0.328055	0.549	0.321	5.3313e-73	S3	Ddah1
3.37728e-77	0.293151	0.85	0.646	9.4557e-73	S3	Anapc13
5.99059e-77	0.292281	0.45	0.229	1.67724e-72	S3	Aldh8a1
1.14547e-76	0.33315	0.388	0.189	3.20708e-72	S3	Hist2h2aa1
2.77728e-76	0.281799	0.286	0.114	7.77582e-72	S3	Ugt8a
6.54725e-76	0.302628	0.467	0.243	1.8331e-71	S3	Aspdh
2.40892e-75	0.320393	0.384	0.186	6.74449e-71	S3	Gss
5.03218e-75	0.324733	0.59	0.354	1.40891e-70	S3	Rer1
5.60725e-75	0.311596	0.479	0.255	1.56992e-70	S3	Cmbl
8.16497e-75	0.337594	0.485	0.266	2.28603e-70	S3	Grhpr
2.26295e-74	0.317349	0.378	0.182	6.33581e-70	S3	Sec11a
4.26928e-74	0.310001	0.381	0.186	1.19531e-69	S3	Abca3
6.04253e-74	0.315949	0.556	0.323	1.69179e-69	S3	Cisd3
2.61975e-73	0.30718	0.384	0.188	7.33477e-69	S3	2610528J11Rik
2.89769e-73	0.300381	0.699	0.449	8.11297e-69	S3	Akr7a5
6.98678e-73	0.299364	0.316	0.14	1.95616e-68	S3	Bcl6
1.00046e-72	0.315824	0.604	0.374	2.80109e-68	S3	Slc25a39
2.26577e-72	0.275267	0.293	0.122	6.3437e-68	S3	Lrrc19
3.6429e-72	0.279254	0.872	0.657	1.01994e-67	S3	Hist1h2bc
9.86659e-72	0.290632	0.787	0.581	2.76245e-67	S3	4833439L19Rik
1.51275e-71	0.28179	0.308	0.134	4.23539e-67	S3	Acss2
3.36471e-71	0.285472	0.307	0.134	9.42053e-67	S3	Rdh16
4.10383e-71	0.300794	0.381	0.186	1.14899e-66	S3	Angptl4
9.37495e-71	0.289296	0.475	0.258	2.6248e-66	S3	Tcea3
6.28723e-70	0.280084	0.322	0.146	1.7603e-65	S3	Por
1.97088e-69	0.276626	0.256	0.102	5.51806e-65	S3	Slc16a9
2.98619e-69	0.292553	0.459	0.251	8.36073e-65	S3	Rnf181
1.35852e-68	0.317949	0.444	0.241	3.80359e-64	S3	Fuca2
2.26578e-68	0.277171	0.303	0.134	6.34374e-64	S3	Npm3
2.57191e-68	0.260261	0.86	0.658	7.20083e-64	S3	Ost4
2.71793e-68	0.284026	0.462	0.25	7.60965e-64	S3	Gcdh
3.56733e-68	0.261061	0.27	0.111	9.98782e-64	S3	Eci2
1.14143e-67	0.283423	0.322	0.148	3.19577e-63	S3	Smlr1
1.95933e-67	0.281411	0.375	0.184	5.48574e-63	S3	Slc22a1
2.03395e-67	0.271998	0.363	0.177	5.69465e-63	S3	Nceh1
3.46526e-67	0.281076	0.421	0.224	9.70203e-63	S3	Nap1l1
4.57975e-67	0.266393	0.407	0.206	1.28224e-62	S3	Sap30
6.79707e-67	0.270526	0.299	0.132	1.90304e-62	S3	Tmem120a
4.92639e-66	0.257406	0.846	0.655	1.37929e-61	S3	Vamp8
5.41596e-65	0.278259	0.525	0.309	1.51636e-60	S3	Stard10
9.84221e-65	0.269058	0.34	0.163	2.75562e-60	S3	Hebp1
1.01266e-64	0.294837	0.639	0.421	2.83523e-60	S3	Hmgcs1
2.15883e-64	0.264641	0.266	0.113	6.04428e-60	S3	Abhd3
4.00779e-64	0.262243	0.419	0.221	1.1221e-59	S3	Pcx
9.9074e-64	0.293117	0.529	0.318	2.77387e-59	S3	Phyh
1.00302e-62	0.277956	0.562	0.339	2.80824e-58	S3	Msra
1.16294e-62	0.260048	0.521	0.305	3.256e-58	S3	Cryz
1.30672e-62	0.270323	0.365	0.184	3.65854e-58	S3	Abcc2
3.99785e-62	0.254098	0.327	0.156	1.11932e-57	S3	Lyrm5
1.68083e-61	0.301283	0.407	0.219	4.70598e-57	S3	Hao2
2.11476e-61	0.298423	0.8	0.6	5.92092e-57	S3	Iscu
2.1505e-61	0.277539	0.334	0.164	6.02097e-57	S3	Ccdc6
5.34383e-61	0.273464	0.328	0.162	1.49617e-56	S3	Slc35a3
7.27638e-61	0.273542	0.709	0.493	2.03724e-56	S3	Hspd1
2.05773e-60	0.308169	0.525	0.319	5.76122e-56	S3	Iah1
2.43794e-60	0.321803	0.276	0.125	6.82575e-56	S3	Abhd2
2.50619e-60	0.258406	0.361	0.183	7.01683e-56	S3	Aldh9a1
7.06133e-60	0.250717	0.296	0.137	1.97703e-55	S3	Tmem150a
9.26682e-60	0.269953	0.482	0.279	2.59452e-55	S3	Mrpl57
1.39837e-59	0.27833	0.403	0.22	3.91515e-55	S3	Tm2d2
2.06901e-59	0.269177	0.55	0.339	5.79281e-55	S3	Tmem167
3.60531e-58	0.259302	0.415	0.229	1.00941e-53	S3	Coa6
6.98532e-58	0.255536	0.473	0.274	1.95575e-53	S3	Col4a3
5.89755e-57	0.299344	0.517	0.315	1.6512e-52	S3	Gstp1
1.01062e-56	0.253441	0.673	0.446	2.82955e-52	S3	Mrps36
5.11319e-56	0.253167	0.324	0.162	1.43159e-51	S3	Tusc2
6.15369e-56	0.253161	0.493	0.29	1.72291e-51	S3	Polr2i
2.80811e-54	0.255233	0.581	0.374	7.86214e-50	S3	Map1lc3a
3.20642e-53	0.252459	0.348	0.183	8.97732e-49	S3	Ivd
4.53075e-53	0.251684	0.533	0.333	1.26852e-48	S3	Abcd3
4.13026e-52	0.261555	0.669	0.462	1.15639e-47	S3	Acot13
1.10061e-50	0.291146	0.816	0.645	3.0815e-46	S3	Etfb
1.59691e-49	0.255184	0.988	0.923	4.47102e-45	S3	Prdx1
3.86336e-47	0.30111	0.606	0.416	1.08166e-42	S3	Ech1
0	1.87368	0.685	0.009	0	S3T2	Serpina1d
0	1.82188	0.762	0.014	0	S3T2	Cyp7b1
0	1.70596	0.856	0.05	0	S3T2	Slc22a7
0	1.27972	0.492	0.005	0	S3T2	Serpina1a
0	1.27968	0.641	0.011	0	S3T2	Mettl7a2
0	1.19994	0.619	0.002	0	S3T2	Serpina1f
0	0.928573	0.536	0.017	0	S3T2	Myo5a
0	0.814286	0.387	0.006	0	S3T2	Slc22a13
0	0.808591	0.365	0.005	0	S3T2	Slc22a19
0	0.722932	0.381	0.004	0	S3T2	Slco4c1
0	0.689539	0.271	0.003	0	S3T2	Bcat1
2.4511e-266	0.819367	0.409	0.014	6.86258e-262	S3T2	Scd1
5.81685e-246	0.553043	0.315	0.008	1.6286e-241	S3T2	Irx1
2.96775e-212	0.930568	0.503	0.032	8.30909e-208	S3T2	Mep1b
1.62587e-169	1.34061	0.729	0.101	4.55211e-165	S3T2	Gpm6a
1.21164e-147	1.42155	0.68	0.093	3.39235e-143	S3T2	Cryab
2.7241e-136	1.1971	0.702	0.111	7.62694e-132	S3T2	Akr1c14
9.6667e-134	0.690806	0.403	0.033	2.70648e-129	S3T2	Tspan13
2.50531e-133	1.30121	0.751	0.137	7.01437e-129	S3T2	Cyp51
9.43038e-131	2.15751	0.994	0.375	2.64032e-126	S3T2	Napsa
9.51051e-129	0.462003	0.254	0.012	2.66275e-124	S3T2	Agt
1.14886e-125	1.70933	0.978	0.373	3.21657e-121	S3T2	Mpv17l
1.06027e-124	0.851239	0.448	0.045	2.96855e-120	S3T2	Kcnk1
1.65677e-114	1.52575	0.895	0.282	4.63862e-110	S3T2	Crot
1.90503e-113	1.3905	0.934	0.288	5.33371e-109	S3T2	Tmigd1
1.4193e-109	0.921921	0.541	0.076	3.97377e-105	S3T2	Cyp2a4
7.10049e-108	0.555405	0.331	0.028	1.98799e-103	S3T2	Slc39a8
1.3641e-107	0.958462	0.586	0.091	3.81921e-103	S3T2	Ppic
1.06228e-106	0.942045	0.547	0.078	2.97416e-102	S3T2	Apob
2.81805e-106	0.752453	0.365	0.035	7.88999e-102	S3T2	Apoc3
3.00697e-105	0.718522	0.387	0.04	8.41893e-101	S3T2	Rnf24
3.18576e-105	1.46984	0.989	0.544	8.9195e-101	S3T2	Ghr
2.94849e-102	1.64184	0.983	0.561	8.25519e-98	S3T2	Acadm
3.18984e-102	0.984282	0.597	0.1	8.93093e-98	S3T2	Slc9a8
2.67939e-101	1.34441	0.746	0.172	7.50176e-97	S3T2	Aadat
1.90931e-100	1.5178	0.956	0.414	5.34568e-96	S3T2	Mep1a
1.52835e-99	0.846105	0.541	0.083	4.27907e-95	S3T2	Mme
2.40373e-99	0.822416	0.464	0.061	6.72996e-95	S3T2	Hmgcr
1.12267e-97	1.46173	0.912	0.318	3.14325e-93	S3T2	Acsm3
2.53846e-90	0.974308	0.613	0.119	7.10717e-86	S3T2	Slc10a2
6.22025e-84	1.31676	0.823	0.289	1.74155e-79	S3T2	Gclc
3.87478e-83	0.813203	0.547	0.1	1.08486e-78	S3T2	C1qtnf3
8.90394e-81	1.09565	0.923	0.383	2.49293e-76	S3T2	Gstm1
6.35931e-80	1.19346	0.934	0.374	1.78048e-75	S3T2	Slc7a13
1.24616e-77	0.575173	0.37	0.048	3.489e-73	S3T2	Akr1d1
3.87864e-76	0.996798	0.823	0.268	1.08594e-71	S3T2	Aqp1
6.08399e-76	1.11411	0.851	0.291	1.7034e-71	S3T2	Slc5a8
1.42523e-73	0.745707	0.569	0.115	3.99035e-69	S3T2	Slc23a1
2.24103e-73	1.10436	1	0.732	6.27444e-69	S3T2	Slc27a2
1.72606e-67	1.0039	0.834	0.318	4.83263e-63	S3T2	Ugt3a1
1.00604e-64	0.891398	0.685	0.196	2.8167e-60	S3T2	Csad
1.31658e-64	0.950702	0.989	0.81	3.68615e-60	S3T2	Chpt1
8.15555e-64	1.08115	0.845	0.347	2.28339e-59	S3T2	Ehhadh
9.32338e-63	1.0437	0.961	0.551	2.61036e-58	S3T2	Lpl
6.17133e-61	0.657746	0.453	0.088	1.72785e-56	S3T2	Bdh1
7.10691e-61	0.949924	0.873	0.34	1.98979e-56	S3T2	Cd36
8.65994e-61	0.808756	0.624	0.16	2.42461e-56	S3T2	Cyp4a10
1.38641e-60	0.715085	0.47	0.096	3.88167e-56	S3T2	Ace
1.40864e-56	0.794723	0.641	0.177	3.94392e-52	S3T2	Slc3a1
6.11225e-56	0.963345	0.818	0.367	1.71131e-51	S3T2	Pank1
9.46419e-56	0.722662	0.624	0.172	2.64978e-51	S3T2	Fgf1
1.79954e-55	0.872373	0.95	0.512	5.03835e-51	S3T2	Nudt19
2.98317e-55	0.891094	0.901	0.465	8.35227e-51	S3T2	Gclm
5.40042e-55	0.908976	0.685	0.23	1.51201e-50	S3T2	Nceh1
3.60656e-53	1.11616	1	0.961	1.00976e-48	S3T2	Kap
2.59986e-52	0.82809	0.613	0.187	7.2791e-48	S3T2	Idi1
5.0907e-50	0.498694	0.392	0.077	1.42529e-45	S3T2	Galns
4.6868e-49	0.704121	0.541	0.144	1.31221e-44	S3T2	Cdo1
8.11796e-48	0.788968	0.68	0.231	2.27287e-43	S3T2	Slc6a18
5.29357e-47	1.00882	0.486	0.131	1.48209e-42	S3T2	Macrod1
1.62185e-46	0.88426	0.895	0.455	4.54085e-42	S3T2	Defb29
2.50863e-46	0.442111	0.359	0.068	7.02366e-42	S3T2	Sqle
7.75248e-46	0.753328	0.635	0.209	2.17054e-41	S3T2	Cth
8.24905e-46	0.916458	0.845	0.414	2.30957e-41	S3T2	Atp11a
2.00272e-44	0.551657	0.354	0.071	5.60722e-40	S3T2	Cyp2d9
8.66504e-44	0.799523	0.354	0.073	2.42604e-39	S3T2	Hsd11b1
4.43118e-41	0.753009	0.624	0.224	1.24064e-36	S3T2	Osbpl8
4.95327e-41	0.606345	0.475	0.128	1.38682e-36	S3T2	Slc6a13
6.24574e-41	0.73594	0.961	0.679	1.74868e-36	S3T2	Tmbim6
9.97809e-41	0.76607	0.851	0.463	2.79366e-36	S3T2	Lypla1
2.48671e-40	0.531741	0.431	0.107	6.96229e-36	S3T2	Tmco3
3.06407e-40	0.399005	0.265	0.045	8.57879e-36	S3T2	Acox2
6.11993e-40	0.664404	0.597	0.195	1.71346e-35	S3T2	D630029K05Rik
8.22421e-40	0.418087	0.287	0.053	2.30261e-35	S3T2	BC035947
1.28568e-39	0.691321	0.635	0.23	3.59966e-35	S3T2	Entpd5
9.65724e-39	0.731981	0.884	0.476	2.70384e-34	S3T2	Pter
1.05904e-37	0.738966	0.961	0.651	2.96509e-33	S3T2	Calml4
3.60265e-37	0.432627	1	1	1.00867e-32	S3T2	mt-Nd1
9.07139e-37	0.377497	0.326	0.068	2.53981e-32	S3T2	Pantr1
2.04799e-36	0.446517	1	0.999	5.73397e-32	S3T2	Fth1
3.31364e-36	0.706318	0.873	0.462	9.27754e-32	S3T2	Ggt1
3.95942e-36	0.576347	1	0.924	1.10856e-31	S3T2	Gpx4
2.28329e-35	0.501379	0.403	0.105	6.39274e-31	S3T2	Med14
1.91521e-34	0.435955	0.287	0.059	5.36221e-30	S3T2	Dmgdh
4.92826e-34	0.658735	0.547	0.19	1.37982e-29	S3T2	Hist1h1c
6.1478e-34	0.729863	0.89	0.537	1.72126e-29	S3T2	Ugt3a2
7.46993e-34	0.485078	0.42	0.115	2.09143e-29	S3T2	Nt5e
3.10084e-33	0.698852	0.514	0.169	8.68172e-29	S3T2	Abhd2
7.80654e-33	0.514514	0.475	0.144	2.18567e-28	S3T2	Lpgat1
9.9641e-33	0.623219	0.63	0.246	2.78975e-28	S3T2	Gss
1.00572e-32	0.693557	0.934	0.599	2.81582e-28	S3T2	Psap
1.76588e-32	0.65507	0.983	0.677	4.94411e-28	S3T2	Acy3
2.06088e-32	0.645531	0.652	0.262	5.77004e-28	S3T2	Gchfr
9.12446e-32	0.698991	0.762	0.408	2.55467e-27	S3T2	Far1
1.54607e-31	0.460368	0.436	0.128	4.32868e-27	S3T2	Tmem19
2.17174e-31	0.52997	0.989	0.866	6.08044e-27	S3T2	Mpc2
6.79827e-31	0.475002	0.403	0.114	1.90338e-26	S3T2	2200002D01Rik
1.00767e-30	0.615771	0.746	0.343	2.82128e-26	S3T2	Lap3
1.09935e-30	0.689055	0.878	0.541	3.07797e-26	S3T2	Tmem176a
1.28473e-30	0.641446	0.989	0.809	3.597e-26	S3T2	Guca2b
3.26423e-30	0.493206	0.464	0.146	9.13918e-26	S3T2	Bhmt2
9.41795e-30	0.530796	0.425	0.128	2.63684e-25	S3T2	Slc15a2
5.27529e-29	0.624812	0.729	0.334	1.47698e-24	S3T2	Nhp2
7.21824e-29	0.519897	0.481	0.163	2.02096e-24	S3T2	Slc22a2
8.10894e-29	0.41154	0.994	0.982	2.27034e-24	S3T2	mt-Nd2
9.4406e-29	0.501345	0.514	0.179	2.64318e-24	S3T2	Tmem243
1.41012e-28	0.744121	0.829	0.504	3.94807e-24	S3T2	Gcnt1
2.50953e-28	0.573474	0.762	0.373	7.02618e-24	S3T2	Ldhd
3.01051e-28	0.287769	0.37	0.098	8.42883e-24	S3T2	Pou3f3
5.07802e-28	0.51104	0.42	0.132	1.42174e-23	S3T2	Lipo1
3.06996e-27	0.492886	0.508	0.179	8.59528e-23	S3T2	Proc
6.7239e-27	0.604241	0.89	0.613	1.88256e-22	S3T2	Cat
8.48061e-27	0.517784	0.923	0.63	2.3744e-22	S3T2	Cyp2j5
2.14994e-26	0.407048	0.74	0.341	6.01939e-22	S3T2	S100a11
4.71792e-26	0.513667	0.818	0.408	1.32092e-21	S3T2	Slc17a3
6.32654e-26	0.648134	0.867	0.581	1.77131e-21	S3T2	Gk
1.09832e-25	0.464052	0.381	0.118	3.07507e-21	S3T2	Cbs
1.62061e-25	0.554965	0.779	0.399	4.53739e-21	S3T2	Me1
1.77985e-25	0.509641	0.994	0.783	4.98323e-21	S3T2	Ttc36
1.8197e-25	0.461881	0.436	0.149	5.0948e-21	S3T2	Slc16a9
4.49808e-25	0.462719	0.293	0.079	1.25937e-20	S3T2	Gramd1b
1.45015e-24	0.368774	0.287	0.075	4.06012e-20	S3T2	Gm4450
1.97325e-24	0.579102	0.641	0.303	5.52471e-20	S3T2	Fuca2
2.52323e-24	0.579825	0.873	0.534	7.06455e-20	S3T2	Tmem176b
3.99e-24	0.345663	0.254	0.062	1.11712e-19	S3T2	Fat1
5.3355e-24	0.484934	0.486	0.187	1.49383e-19	S3T2	Acss2
1.38585e-23	0.419063	0.376	0.118	3.88011e-19	S3T2	Adtrp
1.42302e-23	0.330916	0.387	0.123	3.98416e-19	S3T2	Stmn1
1.42687e-23	0.538785	0.453	0.168	3.99495e-19	S3T2	Trap1
1.78413e-23	0.557837	0.641	0.297	4.99521e-19	S3T2	Reep5
2.12823e-23	0.577434	0.492	0.203	5.95862e-19	S3T2	Galnt1
2.21397e-23	0.421785	0.37	0.117	6.19866e-19	S3T2	Gm15217
3.09093e-23	0.498089	0.867	0.522	8.65399e-19	S3T2	Slc22a12
4.98808e-23	0.399379	0.425	0.148	1.39656e-18	S3T2	Ugdh
5.23106e-23	0.384525	0.287	0.079	1.46459e-18	S3T2	Acy1
1.18252e-22	0.334649	1	1	3.31082e-18	S3T2	mt-Co1
1.39006e-22	0.484427	0.613	0.264	3.89189e-18	S3T2	Eci3
1.42287e-22	0.347748	0.271	0.071	3.98375e-18	S3T2	Oplah
1.42943e-22	0.461055	0.547	0.222	4.00211e-18	S3T2	Mettl7b
1.58658e-22	0.389725	0.425	0.147	4.44209e-18	S3T2	Slc16a4
4.05639e-22	0.596596	0.823	0.493	1.13571e-17	S3T2	Acat1
5.04984e-22	0.485212	0.497	0.198	1.41385e-17	S3T2	9530068E07Rik
1.07104e-21	0.314677	0.26	0.068	2.99869e-17	S3T2	Gm853
1.12088e-21	0.346324	1	0.999	3.13824e-17	S3T2	mt-Co2
1.37788e-21	0.320691	0.32	0.095	3.8578e-17	S3T2	Glb1l2
1.63985e-21	0.367443	0.414	0.143	4.59127e-17	S3T2	AI317395
2.03954e-21	0.393602	0.448	0.164	5.7103e-17	S3T2	Mfap3l
2.42238e-21	0.382362	0.387	0.13	6.78217e-17	S3T2	H2-T22
2.48201e-21	0.45256	0.602	0.268	6.94913e-17	S3T2	Wwp1
2.67059e-21	0.426506	0.486	0.194	7.47712e-17	S3T2	Itfg1
4.36708e-21	0.420371	0.287	0.085	1.2227e-16	S3T2	Acot1
7.02623e-21	0.526064	0.801	0.487	1.9672e-16	S3T2	Slc17a1
1.09742e-20	0.424918	0.961	0.732	3.07255e-16	S3T2	Keg1
1.0996e-20	0.37002	0.298	0.09	3.07865e-16	S3T2	Aacs
1.1933e-20	0.376567	0.392	0.139	3.34102e-16	S3T2	Mtor
2.08634e-20	0.489717	0.519	0.231	5.84132e-16	S3T2	Slc1a1
3.20541e-20	0.522246	0.768	0.481	8.97452e-16	S3T2	Sod1
3.51246e-20	0.310573	0.287	0.084	9.8342e-16	S3T2	Casc4
3.02529e-19	0.465741	0.702	0.361	8.47021e-15	S3T2	Cd164
3.82791e-19	0.339954	0.448	0.17	1.07174e-14	S3T2	Wwc1
4.03026e-19	0.345837	0.293	0.092	1.12839e-14	S3T2	Pdk3
4.63212e-19	0.38412	0.989	0.929	1.2969e-14	S3T2	Rpl35a
4.64619e-19	0.418192	0.42	0.159	1.30084e-14	S3T2	Mpp6
6.50162e-19	0.510149	0.773	0.49	1.82032e-14	S3T2	Hmgcs1
7.16224e-19	0.400002	0.475	0.194	2.00528e-14	S3T2	Slco3a1
3.58429e-18	0.3764	0.541	0.244	1.00353e-13	S3T2	Cmtm6
5.32192e-18	0.422073	0.591	0.276	1.49003e-13	S3T2	Agps
5.36022e-18	0.498331	0.724	0.395	1.50075e-13	S3T2	Lrpap1
5.37103e-18	0.428423	0.934	0.784	1.50378e-13	S3T2	Arpp19
5.87548e-18	0.273402	0.331	0.111	1.64502e-13	S3T2	Cers6
5.98872e-18	0.456449	0.602	0.298	1.67672e-13	S3T2	Hpn
6.30933e-18	0.426415	0.597	0.284	1.76649e-13	S3T2	Fam213a
1.40699e-17	0.39512	0.575	0.266	3.9393e-13	S3T2	Papss2
1.94018e-17	0.460793	0.663	0.337	5.43211e-13	S3T2	Amacr
2.15449e-17	0.332094	0.436	0.174	6.03214e-13	S3T2	Nfs1
2.85541e-17	0.425755	0.95	0.794	7.99457e-13	S3T2	H2afj
3.41836e-17	0.456537	0.514	0.242	9.57074e-13	S3T2	Trps1
3.95397e-17	0.308971	0.298	0.099	1.10703e-12	S3T2	Ahcy
6.78423e-17	0.439295	0.425	0.176	1.89945e-12	S3T2	Acyp2
7.87194e-17	0.309151	0.365	0.135	2.20399e-12	S3T2	D17Wsu92e
9.84041e-17	0.348747	0.403	0.16	2.75512e-12	S3T2	Ankib1
1.16234e-16	0.413634	0.541	0.257	3.25433e-12	S3T2	Slc33a1
1.65294e-16	0.342132	0.436	0.18	4.62791e-12	S3T2	Znrf2
1.65295e-16	0.284157	1	0.995	4.62793e-12	S3T2	Rpl41
1.66311e-16	0.428372	0.818	0.553	4.65638e-12	S3T2	Glul
2.74665e-16	0.314377	0.293	0.099	7.69006e-12	S3T2	Slc30a1
4.29551e-16	0.262014	0.276	0.09	1.20266e-11	S3T2	Phkb
5.03895e-16	0.269757	0.287	0.096	1.4108e-11	S3T2	Ntn1
5.39167e-16	0.425411	0.862	0.562	1.50956e-11	S3T2	RP24-64C6.3
5.7834e-16	0.403277	0.829	0.62	1.61924e-11	S3T2	Oxct1
7.62378e-16	0.394928	0.552	0.268	2.13451e-11	S3T2	Cubn
1.24262e-15	0.397139	0.481	0.216	3.4791e-11	S3T2	Tmem189
1.56644e-15	0.365391	0.552	0.261	4.38573e-11	S3T2	Sod3
1.61127e-15	0.445809	0.536	0.262	4.51124e-11	S3T2	Cyp4a31
1.9651e-15	0.439867	0.702	0.406	5.5019e-11	S3T2	Sypl
2.0131e-15	0.611452	0.646	0.395	5.63629e-11	S3T2	Slc6a6
2.94995e-15	0.342335	0.431	0.182	8.25928e-11	S3T2	Coasy
3.79305e-15	0.313174	0.343	0.131	1.06198e-10	S3T2	Asah1
6.34477e-15	0.36567	0.442	0.194	1.77641e-10	S3T2	Eif4g3
7.95325e-15	0.328715	0.63	0.336	2.22675e-10	S3T2	Aplp2
8.08524e-15	0.445476	0.536	0.279	2.26371e-10	S3T2	Gatad1
1.23138e-14	0.400065	0.685	0.374	3.44762e-10	S3T2	BC026585
1.66459e-14	0.328396	0.436	0.189	4.66051e-10	S3T2	Pxmp4
1.86327e-14	0.282237	0.398	0.164	5.21678e-10	S3T2	Grsf1
2.70505e-14	0.396655	0.569	0.287	7.5736e-10	S3T2	Pcbd2
3.17366e-14	0.303994	0.475	0.214	8.88561e-10	S3T2	Serpinf2
5.37863e-14	0.354826	0.315	0.122	1.50591e-09	S3T2	Gm27216
6.01114e-14	0.297863	0.293	0.106	1.683e-09	S3T2	Coprs
6.03776e-14	0.317935	0.448	0.198	1.69045e-09	S3T2	Rfk
6.2249e-14	0.397568	0.807	0.554	1.74285e-09	S3T2	Med28
6.62126e-14	0.350688	0.442	0.196	1.85382e-09	S3T2	Paqr9
7.09363e-14	0.301868	0.376	0.155	1.98607e-09	S3T2	Rnf10
7.88732e-14	0.333553	0.337	0.135	2.20829e-09	S3T2	Tpk1
7.92336e-14	0.434394	0.746	0.447	2.21838e-09	S3T2	Bphl
8.08714e-14	0.331927	0.508	0.255	2.26424e-09	S3T2	Tmed7
1.06944e-13	0.404015	0.928	0.796	2.99422e-09	S3T2	Ndufb8
1.19335e-13	0.374991	0.867	0.607	3.34115e-09	S3T2	Pdzk1
1.54465e-13	0.325178	0.967	0.866	4.32471e-09	S3T2	Ndufa1
3.30996e-13	0.375646	0.508	0.261	9.26724e-09	S3T2	Ctsh
4.45189e-13	0.273782	0.309	0.121	1.24644e-08	S3T2	Tm7sf3
5.29758e-13	0.294571	0.381	0.161	1.48322e-08	S3T2	Gfer
6.09802e-13	0.292939	0.392	0.171	1.70732e-08	S3T2	Mettl9
7.7128e-13	0.348618	0.503	0.251	2.15943e-08	S3T2	Gm5617
7.81745e-13	0.276896	0.989	0.976	2.18873e-08	S3T2	Gm10076
8.84615e-13	0.316057	0.298	0.117	2.47675e-08	S3T2	Tmem178
1.10826e-12	0.360198	0.519	0.258	3.10292e-08	S3T2	Mettl7a1
1.13628e-12	0.312914	0.818	0.493	3.18136e-08	S3T2	Cda
1.22631e-12	0.278664	0.331	0.134	3.43343e-08	S3T2	Cdhr5
1.27504e-12	0.338808	0.912	0.717	3.56985e-08	S3T2	Vamp8
1.58562e-12	0.311121	0.271	0.104	4.43942e-08	S3T2	Eaf2
1.7178e-12	0.323833	0.575	0.308	4.8095e-08	S3T2	Tmem229a
2.34728e-12	0.282474	1	0.965	6.57193e-08	S3T2	Ndufa4
3.0844e-12	0.27068	0.436	0.2	8.6357e-08	S3T2	Hax1
3.16788e-12	0.268046	0.331	0.137	8.86942e-08	S3T2	Tpmt
3.9471e-12	0.311622	0.972	0.83	1.10511e-07	S3T2	Scp2
4.11405e-12	0.371014	0.569	0.317	1.15185e-07	S3T2	Gm2a
4.35189e-12	0.385703	0.558	0.304	1.21844e-07	S3T2	Slc22a18
5.25182e-12	0.291025	0.475	0.234	1.4704e-07	S3T2	Ivd
5.79717e-12	0.285131	0.978	0.907	1.62309e-07	S3T2	mt-Nd4l
5.94435e-12	0.351757	0.409	0.19	1.6643e-07	S3T2	Trim7
5.96806e-12	0.271163	0.304	0.122	1.67094e-07	S3T2	Blmh
6.98035e-12	0.288864	1	0.943	1.95436e-07	S3T2	Prdx5
8.54951e-12	0.279342	0.376	0.17	2.39369e-07	S3T2	Atp13a3
9.98146e-12	0.340321	0.58	0.308	2.79461e-07	S3T2	Guk1
1.14105e-11	0.307267	0.685	0.393	3.1947e-07	S3T2	Ddah1
1.33862e-11	0.342802	0.508	0.273	3.74786e-07	S3T2	Bnip3l
1.79922e-11	0.291435	0.453	0.223	5.03745e-07	S3T2	Aco1
1.83963e-11	0.310303	0.785	0.511	5.1506e-07	S3T2	Lactb2
1.9143e-11	0.307665	0.597	0.322	5.35966e-07	S3T2	Slc9a3r1
2.00926e-11	0.304423	0.608	0.34	5.62552e-07	S3T2	Abhd14b
2.08271e-11	0.257138	0.983	0.922	5.83118e-07	S3T2	mt-Nd5
2.15568e-11	0.252675	0.265	0.102	6.03549e-07	S3T2	Afap1l1
3.16815e-11	0.331422	0.823	0.573	8.87018e-07	S3T2	0610011F06Rik
7.61951e-11	0.269808	0.326	0.141	2.13331e-06	S3T2	Ebp
8.56974e-11	0.340962	0.691	0.423	2.39936e-06	S3T2	Tmem205
9.86843e-11	0.33437	0.552	0.316	2.76296e-06	S3T2	Chuk
1.00355e-10	0.271332	0.459	0.234	2.80973e-06	S3T2	Pole4
1.079e-10	0.331842	0.74	0.483	3.02098e-06	S3T2	Snhg18
1.09077e-10	0.368824	0.486	0.276	3.05393e-06	S3T2	Tmem174
1.75585e-10	0.275098	0.387	0.183	4.91603e-06	S3T2	Furin
1.95993e-10	0.263872	0.503	0.264	5.48742e-06	S3T2	Adhfe1
2.02344e-10	0.272383	0.525	0.277	5.66523e-06	S3T2	Tm2d2
2.05883e-10	0.364722	0.536	0.311	5.76433e-06	S3T2	Itgb8
2.13584e-10	0.258284	0.972	0.854	5.97991e-06	S3T2	Rps27l
2.40005e-10	0.292164	0.845	0.606	6.71966e-06	S3T2	Plscr2
2.74608e-10	0.258944	0.392	0.19	7.68848e-06	S3T2	Amfr
3.07419e-10	0.26279	0.425	0.212	8.60711e-06	S3T2	Agpat3
3.36439e-10	0.301065	0.746	0.533	9.41962e-06	S3T2	Atp6v1a
5.98647e-10	0.270285	0.425	0.215	1.67609e-05	S3T2	Slc35a3
6.11358e-10	0.300952	0.63	0.377	1.71168e-05	S3T2	Stard10
7.06671e-10	0.27508	0.796	0.529	1.97854e-05	S3T2	Akr7a5
7.11496e-10	0.27292	0.475	0.251	1.99205e-05	S3T2	Rnf128
7.91692e-10	0.323546	0.691	0.435	2.21658e-05	S3T2	Lsm4
8.33181e-10	0.258687	0.298	0.131	2.33274e-05	S3T2	Gadd45a
8.45067e-10	0.376128	0.464	0.253	2.36602e-05	S3T2	Hist2h2aa1
9.09531e-10	0.284976	0.669	0.394	2.5465e-05	S3T2	Lgals1
1.06536e-09	0.322585	0.575	0.336	2.9828e-05	S3T2	Ak4
1.21743e-09	0.290677	0.558	0.318	3.40857e-05	S3T2	Gcdh
1.2188e-09	0.269019	0.867	0.647	3.41238e-05	S3T2	Lamp1
1.24483e-09	0.28471	0.608	0.355	3.48527e-05	S3T2	2310039H08Rik
1.59793e-09	0.309299	0.691	0.447	4.47388e-05	S3T2	Slc25a39
1.60984e-09	0.296906	0.343	0.163	4.50723e-05	S3T2	St8sia1
1.99144e-09	0.256843	0.315	0.148	5.57564e-05	S3T2	C1galt1
2.62907e-09	0.281096	0.536	0.306	7.36086e-05	S3T2	Serinc1
4.64514e-09	0.284939	0.337	0.167	0.000130055	S3T2	Ar
4.70081e-09	0.266782	0.575	0.343	0.000131613	S3T2	Ddrgk1
5.00802e-09	0.255898	0.503	0.275	0.000140215	S3T2	Cideb
5.45287e-09	0.277059	0.928	0.721	0.000152669	S3T2	Lrp2
5.56564e-09	0.273967	0.84	0.624	0.000155827	S3T2	Lamp2
1.15597e-08	0.308905	0.586	0.364	0.000323648	S3T2	1810058I24Rik
1.32767e-08	0.26119	0.669	0.427	0.00037172	S3T2	Ankrd13c
1.71185e-08	0.273555	0.74	0.475	0.000479283	S3T2	Ech1
1.92742e-08	0.25929	0.503	0.284	0.00053964	S3T2	Gls
2.12423e-08	0.274805	0.657	0.428	0.000594743	S3T2	Fkbp2
2.2564e-08	0.299993	0.53	0.316	0.000631748	S3T2	Ccni
2.56881e-08	0.265253	0.309	0.152	0.000719214	S3T2	Fmo5
3.71156e-08	0.276955	0.387	0.205	0.00103916	S3T2	Chac2
7.37253e-08	0.270094	0.365	0.193	0.00206416	S3T2	Acadl
7.65617e-08	0.397414	0.309	0.162	0.00214358	S3T2	Tet2
7.71791e-08	0.271578	0.757	0.528	0.00216086	S3T2	Acot13
8.31565e-08	0.342726	0.602	0.412	0.00232822	S3T2	Tob1
1.11657e-07	0.348731	0.602	0.385	0.00312619	S3T2	Iah1
1.60528e-07	0.256172	0.691	0.456	0.00449445	S3T2	Slc22a30
4.06719e-07	0.287034	0.702	0.497	0.0113873	S3T2	1810037I17Rik
4.07662e-07	0.25764	0.646	0.431	0.0114137	S3T2	Rer1
5.08937e-07	0.323699	1	0.896	0.0142492	S3T2	Spink1
6.9274e-07	0.261957	0.878	0.714	0.0193953	S3T2	Timm13
1.6219e-06	0.274221	0.779	0.558	0.04541	S3T2	Ccdc107
2.11335e-06	0.254156	0.79	0.598	0.0591696	S3T2	Tmbim4
2.16546e-06	0.254159	0.541	0.353	0.0606286	S3T2	Fuca1
3.87398e-06	0.501249	0.729	0.596	0.108464	S3T2	Mat2a
5.93918e-06	0.263922	0.878	0.729	0.166285	S3T2	Igfbp7
1.67e-05	0.280213	0.68	0.546	0.467566	S3T2	Rbm47
0	3.85211	0.986	0.088	0	LOH	Slc12a1
0	3.21519	0.972	0.178	0	LOH	Egf
0	3.04075	0.958	0.155	0	LOH	Wfdc15b
0	2.45315	0.868	0.114	0	LOH	Slc5a3
0	2.31196	0.962	0.114	0	LOH	Ppp1r1a
0	1.95676	0.78	0.07	0	LOH	Sostdc1
0	1.27137	0.425	0.012	0	LOH	Ppp1r1b
0	1.01692	0.338	0.007	0	LOH	Ptger3
0	1.01036	0.296	0.004	0	LOH	Nccrp1
0	0.791289	0.268	0.004	0	LOH	Cldn19
3.29938e-288	3.46205	0.983	0.227	9.23761e-284	LOH	Umod
9.55762e-250	1.6095	0.767	0.11	2.67594e-245	LOH	Kng2
1.97947e-209	0.961882	0.317	0.016	5.54211e-205	LOH	Gpx6
1.48574e-208	1.12643	0.47	0.043	4.15978e-204	LOH	Mfsd4
3.7677e-194	1.44302	0.596	0.08	1.05488e-189	LOH	Ckb
7.96489e-170	1.09562	0.429	0.044	2.23001e-165	LOH	Tmem72
5.20509e-166	1.68804	0.93	0.307	1.45732e-161	LOH	Mt1
2.09898e-155	1.34457	0.641	0.125	5.87673e-151	LOH	Mrps6
1.74934e-150	1.25848	0.686	0.136	4.89781e-146	LOH	Cd24a
4.15086e-145	1.20663	0.526	0.083	1.16216e-140	LOH	Epcam
3.5442e-144	1.10029	0.634	0.116	9.92306e-140	LOH	Kcnj1
1.31504e-135	1.43848	0.676	0.166	3.68186e-131	LOH	Etnk1
4.20673e-133	1.4106	0.596	0.116	1.1778e-128	LOH	Wfdc2
2.77815e-121	0.933294	0.411	0.058	7.77827e-117	LOH	Slc16a7
3.5843e-121	1.20536	0.976	0.808	1.00353e-116	LOH	Atp1b1
1.18786e-120	1.24896	0.969	0.732	3.32577e-116	LOH	Atp1a1
4.49217e-120	1.33331	0.815	0.298	1.25772e-115	LOH	Nudt4
2.68467e-113	0.843186	0.317	0.036	7.51653e-109	LOH	Slit2
1.7591e-111	0.922282	0.324	0.04	4.92513e-107	LOH	Slc5a1
5.27402e-107	0.910328	0.397	0.062	1.47662e-102	LOH	Pantr1
1.78178e-100	0.978314	0.446	0.081	4.98863e-96	LOH	Efhd1
1.68659e-96	1.1337	0.526	0.129	4.72212e-92	LOH	Dst
2.65824e-95	0.788391	0.481	0.094	7.44254e-91	LOH	Tspan8
9.79213e-93	1.00311	0.512	0.113	2.7416e-88	LOH	Mal
2.73171e-92	0.73489	0.307	0.041	7.64824e-88	LOH	Tfap2b
2.51927e-91	1.17637	0.78	0.321	7.05345e-87	LOH	Txnip
2.96931e-88	0.353846	0.767	0.242	8.31347e-84	LOH	Defb1
3.38793e-88	1.08894	0.425	0.086	9.48552e-84	LOH	Pdk4
7.49947e-86	1.07977	0.544	0.15	2.0997e-81	LOH	Paqr5
1.46722e-85	0.953749	0.902	0.457	4.10793e-81	LOH	Spp1
1.48738e-85	1.08973	0.498	0.115	4.16436e-81	LOH	Mt2
4.56048e-84	0.853486	0.314	0.048	1.27684e-79	LOH	Mfsd7b
2.75713e-79	1.04048	0.53	0.151	7.71941e-75	LOH	Cyfip2
5.62258e-79	0.641459	0.268	0.037	1.57421e-74	LOH	Hk1
2.75998e-78	0.758894	0.251	0.032	7.72739e-74	LOH	Rgs2
5.04894e-74	0.92251	0.916	0.584	1.4136e-69	LOH	Ly6a
1.15127e-71	0.987186	0.516	0.143	3.22333e-67	LOH	Egr1
1.60194e-71	0.704226	0.282	0.045	4.48512e-67	LOH	Kcnk1
3.63594e-69	0.870407	0.523	0.143	1.01799e-64	LOH	Tmem213
9.23254e-69	0.69666	0.317	0.056	2.58493e-64	LOH	Abca13
3.00746e-68	0.777028	0.366	0.076	8.42028e-64	LOH	Mecom
7.27707e-68	0.608025	0.997	1	2.03743e-63	LOH	mt-Co1
3.19864e-64	0.716545	0.314	0.061	8.95556e-60	LOH	Cd59a
1.7548e-62	0.832973	0.477	0.133	4.9131e-58	LOH	Pkm
7.91932e-62	0.504987	1	1	2.21725e-57	LOH	mt-Co3
4.1847e-60	0.701853	0.258	0.045	1.17163e-55	LOH	Rap1gap
1.66721e-59	0.549135	0.714	0.383	4.66784e-55	LOH	Klk1
5.6546e-56	1.0848	0.275	0.053	1.58317e-51	LOH	Sfrp1
3.98647e-54	0.732228	0.345	0.084	1.11613e-49	LOH	Pde1a
1.6509e-53	0.627411	0.254	0.048	4.62218e-49	LOH	Me3
1.49957e-49	0.799035	0.328	0.081	4.19848e-45	LOH	Clcnkb
1.14137e-46	0.9152	0.39	0.119	3.1956e-42	LOH	Hes1
1.57154e-42	0.388555	1	1	4.4e-38	LOH	mt-Cytb
1.97492e-42	0.637154	0.334	0.096	5.52939e-38	LOH	Pou3f3
4.71318e-42	0.579543	0.296	0.074	1.3196e-37	LOH	Tspan12
5.78419e-42	0.618805	0.286	0.071	1.61946e-37	LOH	Krt7
2.84162e-40	0.877823	0.711	0.415	7.95596e-36	LOH	Gadd45g
1.30274e-39	0.401846	1	0.999	3.64742e-35	LOH	mt-Co2
3.48472e-39	0.660953	0.275	0.072	9.75653e-35	LOH	Bag4
5.09375e-39	0.389884	1	1	1.42615e-34	LOH	mt-Atp6
1.74496e-38	0.686577	0.321	0.095	4.88553e-34	LOH	Adgrg1
2.60131e-38	0.699975	0.613	0.296	7.28314e-34	LOH	Junb
7.90602e-38	0.704186	0.787	0.6	2.21353e-33	LOH	Ivns1abp
1.66523e-37	0.753169	0.422	0.161	4.66232e-33	LOH	Cgnl1
1.80296e-37	0.643262	0.767	0.503	5.04792e-33	LOH	Sdc4
1.8954e-37	0.649902	0.345	0.111	5.30674e-33	LOH	P3h2
3.9377e-37	0.68313	0.328	0.102	1.10248e-32	LOH	Sorl1
4.03527e-36	0.651381	0.265	0.072	1.1298e-31	LOH	Enah
4.15896e-36	0.612437	0.254	0.065	1.16443e-31	LOH	Cd82
2.07081e-35	0.530165	0.948	0.88	5.79786e-31	LOH	mt-Nd3
4.15458e-34	0.81503	0.449	0.196	1.1632e-29	LOH	Bhlhe40
7.56285e-34	0.621423	0.272	0.078	2.11745e-29	LOH	Prps2
8.24552e-34	0.703984	0.362	0.131	2.30858e-29	LOH	Acadsb
3.18257e-33	0.647271	0.314	0.102	8.91056e-29	LOH	Ndrg2
3.60032e-33	0.794529	0.645	0.393	1.00802e-28	LOH	Zfp36l1
3.8975e-33	0.790039	0.488	0.233	1.09122e-28	LOH	Ppargc1a
4.50898e-33	0.336717	1	0.998	1.26242e-28	LOH	mt-Nd4
5.19071e-33	0.510905	0.411	0.148	1.4533e-28	LOH	Hoxd8
3.34105e-32	0.729156	0.436	0.193	9.35426e-28	LOH	Aktip
3.34167e-32	0.627885	0.331	0.112	9.35599e-28	LOH	Wnk4
1.52685e-31	0.718793	0.62	0.367	4.27487e-27	LOH	Spint2
2.09417e-31	0.755178	0.443	0.203	5.86325e-27	LOH	Acsl1
4.02806e-31	0.650151	0.31	0.103	1.12778e-26	LOH	Nfe2l1
2.30539e-28	0.604072	0.408	0.164	6.45464e-24	LOH	Ier3
4.87816e-28	0.454213	0.962	0.901	1.36579e-23	LOH	Cox5b
9.53947e-28	0.664628	0.425	0.185	2.67086e-23	LOH	Fabp3
8.8534e-27	0.687269	0.348	0.142	2.47877e-22	LOH	Irf2bpl
1.80653e-26	0.589317	0.606	0.371	5.05793e-22	LOH	Idh2
1.89719e-26	0.439243	0.296	0.098	5.31175e-22	LOH	Cldn8
5.24691e-26	0.64233	0.394	0.176	1.46903e-21	LOH	Mgst1
6.45174e-26	0.432436	0.254	0.079	1.80636e-21	LOH	Crip2
1.68988e-25	0.751695	0.495	0.271	4.73133e-21	LOH	1700011H14Rik
2.09198e-25	0.538193	0.864	0.693	5.85712e-21	LOH	Neat1
2.05164e-24	0.557493	0.289	0.108	5.74419e-20	LOH	Gbas
1.63688e-23	0.468986	0.854	0.764	4.58292e-19	LOH	Atp5a1
8.35139e-22	0.492457	0.251	0.086	2.33822e-17	LOH	Lgals3
2.29992e-21	0.528339	0.352	0.155	6.43932e-17	LOH	Cdh1
3.98467e-21	0.469098	0.261	0.097	1.11563e-16	LOH	Tanc1
2.06877e-20	0.600744	0.376	0.184	5.79215e-16	LOH	Nfat5
2.65833e-20	0.531966	0.282	0.114	7.44279e-16	LOH	Gm17750
1.19677e-19	0.512946	0.592	0.393	3.3507e-15	LOH	Cdh16
7.77977e-19	0.54659	0.627	0.472	2.17818e-14	LOH	Bag1
1.27896e-18	0.594993	0.404	0.23	3.58085e-14	LOH	Pkp4
7.84753e-18	0.597799	0.554	0.378	2.19715e-13	LOH	Ogt
1.29175e-17	0.4699	0.868	0.839	3.61663e-13	LOH	Cox7b
7.82234e-17	0.594516	0.544	0.372	2.1901e-12	LOH	Mgst3
1.8472e-16	0.309757	0.93	0.915	5.1718e-12	LOH	Uqcrh
2.29194e-16	0.638268	0.474	0.295	6.41697e-12	LOH	Wnk1
4.75858e-16	0.397652	0.749	0.638	1.33231e-11	LOH	Aldoa
5.72144e-16	0.325058	0.875	0.755	1.60189e-11	LOH	Ldhb
1.48192e-15	0.472254	0.265	0.12	4.14907e-11	LOH	Mturn
5.69064e-15	0.292293	0.962	0.923	1.59327e-10	LOH	Atp5g1
9.36602e-15	0.462968	0.261	0.12	2.6223e-10	LOH	Smagp
1.05643e-14	0.496262	0.376	0.218	2.95778e-10	LOH	Arrdc3
1.47806e-14	0.403246	0.3	0.142	4.13828e-10	LOH	Aif1l
1.90608e-14	0.49783	0.488	0.334	5.33665e-10	LOH	Rabac1
2.37221e-14	0.494151	0.321	0.171	6.64172e-10	LOH	Wwc1
2.47598e-14	0.31913	0.902	0.854	6.93225e-10	LOH	Atp5g3
2.96262e-14	0.496613	0.293	0.144	8.29475e-10	LOH	Slc38a2
4.40625e-14	0.408606	0.728	0.621	1.23366e-09	LOH	Oxct1
4.41688e-14	0.496029	0.631	0.507	1.23664e-09	LOH	1110001J03Rik
6.15443e-14	0.538015	0.404	0.247	1.72312e-09	LOH	Hadhb
7.47652e-14	0.490337	0.275	0.138	2.09327e-09	LOH	Wwc2
8.67091e-14	0.449199	0.324	0.167	2.42768e-09	LOH	Ccnd1
1.43917e-13	0.581463	0.432	0.284	4.02938e-09	LOH	Gls
2.17946e-13	0.31806	0.892	0.849	6.10204e-09	LOH	Atp5b
4.34067e-13	0.458852	0.258	0.125	1.2153e-08	LOH	Got1
2.21435e-12	0.36065	0.272	0.132	6.19973e-08	LOH	Anxa5
3.83304e-12	0.284632	0.892	0.825	1.07317e-07	LOH	Ndufb9
7.44833e-12	0.395269	0.627	0.516	2.08538e-07	LOH	Sdha
9.16739e-12	0.507616	0.282	0.142	2.56669e-07	LOH	Tmem52b
1.29174e-11	0.454802	0.61	0.513	3.6166e-07	LOH	Gabarapl1
1.40751e-11	0.471953	0.275	0.15	3.94076e-07	LOH	Elovl7
1.60712e-11	0.297109	0.641	0.515	4.4996e-07	LOH	Calm2
4.16742e-11	0.482015	0.321	0.186	1.1668e-06	LOH	Selm
4.42225e-11	0.420391	0.286	0.159	1.23814e-06	LOH	Lmo7
5.06795e-11	0.446792	0.54	0.426	1.41893e-06	LOH	Kcnj16
5.17513e-11	0.31042	0.3	0.158	1.44893e-06	LOH	Btg2
8.61753e-11	0.450902	0.362	0.232	2.41273e-06	LOH	Arhgap5
9.30161e-11	0.457215	0.383	0.251	2.60426e-06	LOH	Rnf128
1.84186e-10	0.436349	0.279	0.159	5.15683e-06	LOH	Pkhd1
2.56456e-10	0.449961	0.516	0.413	7.18026e-06	LOH	Tob1
2.91742e-10	0.43615	0.275	0.154	8.16819e-06	LOH	Eps8l2
6.31372e-10	0.319892	0.282	0.148	1.76771e-05	LOH	Cd9
6.9008e-10	0.325873	0.749	0.698	1.93209e-05	LOH	S100a1
1.48119e-09	0.627346	0.575	0.516	4.14704e-05	LOH	Cldn10
1.81718e-09	0.364626	0.397	0.258	5.08775e-05	LOH	Oat
3.32955e-09	0.485776	0.422	0.312	9.32208e-05	LOH	Usp2
1.02319e-08	0.335439	0.655	0.586	0.000286472	LOH	Sec62
1.17972e-08	0.270862	0.774	0.734	0.000330297	LOH	Slc25a3
1.302e-08	0.43531	0.401	0.281	0.000364534	LOH	Zfp36
1.55341e-08	0.364973	0.258	0.151	0.000434924	LOH	Tmx2
1.81461e-08	0.402714	0.38	0.265	0.000508054	LOH	Itgav
2.62054e-08	0.41582	0.341	0.237	0.0007337	LOH	Cpt1a
3.22811e-08	0.382373	0.408	0.294	0.000903806	LOH	Pura
3.31106e-08	0.42876	0.415	0.303	0.000927032	LOH	Tfcp2l1
3.61549e-08	0.319913	0.561	0.467	0.00101226	LOH	Aco2
9.56582e-08	0.425141	0.286	0.186	0.00267824	LOH	Nr2f2
1.21051e-07	0.387795	0.411	0.306	0.00338918	LOH	Ctnnb1
2.98385e-07	0.277504	0.829	0.786	0.00835419	LOH	Ndufa5
3.22428e-07	0.350533	0.425	0.32	0.00902733	LOH	Ctsd
4.84127e-07	0.382615	0.289	0.194	0.0135546	LOH	Nptn
5.62539e-07	0.343414	0.331	0.231	0.01575	LOH	Lsm6
5.7618e-07	0.282588	0.585	0.505	0.0161319	LOH	Ndufv2
5.91372e-07	0.253436	0.822	0.816	0.0165572	LOH	Atp5h
6.71808e-07	0.318135	0.641	0.59	0.0188093	LOH	Atp6v0e
7.64949e-07	0.355049	0.359	0.265	0.021417	LOH	Msi2
9.28453e-07	0.379004	0.314	0.212	0.0259948	LOH	Chka
1.0887e-06	0.337457	0.39	0.299	0.0304814	LOH	Gas6
1.64513e-06	0.404956	0.254	0.167	0.0460603	LOH	Atrx
1.70553e-06	0.318013	0.551	0.479	0.0477514	LOH	Prdx2
1.87416e-06	0.419497	0.422	0.339	0.0524728	LOH	Pim3
1.98991e-06	0.341814	0.359	0.259	0.0557134	LOH	Syne2
2.27485e-06	0.250568	0.704	0.649	0.0636914	LOH	Ndufa11
2.3078e-06	0.304312	0.328	0.226	0.0646139	LOH	Ctnna1
4.14023e-06	0.47926	0.331	0.242	0.115918	LOH	H1f0
5.74869e-06	0.326104	0.258	0.17	0.160952	LOH	Slc43a2
6.67261e-06	0.319831	0.443	0.359	0.18682	LOH	Mcee
1.28984e-05	0.337667	0.317	0.232	0.36113	LOH	Bicc1
1.76512e-05	0.310004	0.289	0.205	0.4942	LOH	Ddx6
2.64536e-05	0.344115	0.47	0.412	0.740649	LOH	Pnkd
3.27363e-05	0.309037	0.624	0.59	0.916551	LOH	Eif4a2
5.131e-05	0.318713	0.383	0.315	1	LOH	Immt
5.41702e-05	0.347726	0.366	0.306	1	LOH	Vegfa
5.84804e-05	0.300398	0.314	0.239	1	LOH	Kidins220
7.92402e-05	0.319954	0.272	0.201	1	LOH	Eva1a
8.08871e-05	0.252923	0.54	0.467	1	LOH	Slc25a4
8.27072e-05	0.250903	0.369	0.279	1	LOH	Wbp5
9.35596e-05	0.343966	0.411	0.361	1	LOH	Ogdh
0.000132986	0.527604	0.258	0.196	1	LOH	Hist1h1c
0.000214939	0.34539	0.432	0.386	1	LOH	Camk2n1
0.000320489	0.261689	0.429	0.371	1	LOH	Luc7l2
0.000336585	0.266033	0.254	0.187	1	LOH	Ash1l
0.000349238	0.29874	0.272	0.206	1	LOH	Acadvl
0.000354158	0.336873	0.446	0.42	1	LOH	Aes
0.000389315	0.2682	0.345	0.277	1	LOH	Ypel3
0.000429711	0.299103	0.39	0.333	1	LOH	Ctsb
0.000517683	0.268083	0.348	0.286	1	LOH	Fus
0.000536241	0.306976	0.296	0.236	1	LOH	Pdhb
0.000861924	0.286992	0.268	0.209	1	LOH	Zfp36l2
0.000896601	0.353817	0.672	0.683	1	LOH	Id2
0.000989404	0.258962	0.324	0.264	1	LOH	Gpi1
0.00220283	0.262368	0.373	0.326	1	LOH	Igf1r
0.00223512	0.261863	0.436	0.407	1	LOH	Ndufs2
0.00257139	0.274571	0.314	0.266	1	LOH	Hcfc1r1
0.00342589	0.254181	0.338	0.29	1	LOH	Clk1
0.00365345	0.261464	0.376	0.337	1	LOH	Phb
0.00454038	0.265085	0.254	0.206	1	LOH	Itgb6
0.00662578	0.263072	0.352	0.32	1	LOH	Ccni
0.00675077	0.252342	0.422	0.397	1	LOH	Tmem106b
0	1.14475	0.529	0.017	0	CNT	AI838599
0	1.06733	0.484	0.01	0	CNT	Trpv5
0	0.981779	0.522	0.017	0	CNT	Atp2b4
1.59232e-305	1.24824	0.618	0.028	4.45817e-301	CNT	Scnn1g
1.56423e-278	1.6795	0.898	0.077	4.37954e-274	CNT	Pgam2
1.10148e-267	2.70126	0.981	0.114	3.08393e-263	CNT	Clu
2.14644e-253	1.11336	0.599	0.033	6.00961e-249	CNT	Scnn1b
3.7164e-241	2.32692	1	0.13	1.04052e-236	CNT	Tmem52b
2.42603e-212	1.26215	0.682	0.055	6.7924e-208	CNT	Rhcg
2.62348e-210	1.08237	0.484	0.026	7.34522e-206	CNT	Ptges
3.20662e-208	0.768672	0.312	0.009	8.97791e-204	CNT	Ltc4s
2.63164e-206	3.36072	0.975	0.163	7.36806e-202	CNT	Calb1
4.54012e-206	1.69087	0.924	0.118	1.27114e-201	CNT	Kcnj1
6.47051e-199	1.10617	0.548	0.037	1.81161e-194	CNT	Tspan1
8.55023e-194	1.76247	0.904	0.118	2.39389e-189	CNT	Wfdc2
7.31543e-193	1.01027	0.433	0.023	2.04817e-188	CNT	Fzd7
3.90454e-191	1.2137	0.637	0.055	1.09319e-186	CNT	Ermp1
1.00597e-188	1.28743	0.745	0.075	2.81651e-184	CNT	Scd2
2.26512e-188	1.77181	0.694	0.066	6.3419e-184	CNT	Hsd11b2
1.20443e-174	1.30446	0.752	0.082	3.37215e-170	CNT	Sostdc1
4.14223e-173	1.19644	0.656	0.062	1.15974e-168	CNT	Cav2
6.35853e-171	1.13107	0.497	0.035	1.78026e-166	CNT	Rhbg
3.25811e-164	1.40058	0.854	0.119	9.12206e-160	CNT	Kng2
5.46396e-162	0.760299	0.357	0.018	1.5298e-157	CNT	Phactr1
1.35647e-156	2.53441	1	0.246	3.79784e-152	CNT	Defb1
4.70291e-156	1.28045	0.828	0.113	1.31672e-151	CNT	Mal
8.16179e-149	0.992114	0.548	0.05	2.28514e-144	CNT	Kcnj10
1.00589e-148	0.87587	0.522	0.045	2.81628e-144	CNT	Slc35g1
6.63461e-148	1.41787	0.873	0.143	1.85756e-143	CNT	Hoxd8
1.32854e-143	1.08353	0.669	0.078	3.71965e-139	CNT	Clcnkb
2.42052e-141	0.592736	0.261	0.01	6.77696e-137	CNT	Hhatl
3.36139e-139	1.22268	0.707	0.093	9.41123e-135	CNT	Cldn8
8.12821e-129	2.1711	0.981	0.288	2.27573e-124	CNT	Wnk1
3.44446e-127	1.02375	0.624	0.076	9.6438e-123	CNT	Mecom
4.81262e-124	1.19666	0.79	0.135	1.34744e-119	CNT	Aif1l
1.13208e-121	3.77891	0.987	0.383	3.1696e-117	CNT	Klk1
3.15211e-121	0.994713	0.554	0.062	8.82527e-117	CNT	Tacstd2
1.41161e-120	4.07275	1	0.436	3.95222e-116	CNT	S100g
9.66047e-119	1.26453	0.822	0.143	2.70474e-114	CNT	Tmem213
2.95821e-110	0.969776	0.535	0.064	8.28239e-106	CNT	Scnn1a
2.39976e-109	2.30913	0.994	0.463	6.71886e-105	CNT	Spp1
3.14714e-105	1.45288	0.968	0.304	8.81136e-101	CNT	Nudt4
5.49996e-105	0.931203	0.51	0.062	1.53988e-100	CNT	Hoxd9
7.75241e-105	0.56864	0.274	0.017	2.17052e-100	CNT	Trpm6
2.12753e-104	2.23579	0.987	0.523	5.95666e-100	CNT	Kl
3.70904e-104	0.827532	0.516	0.063	1.03846e-99	CNT	Tmem65
2.83575e-103	0.768525	0.452	0.048	7.93953e-99	CNT	Hoxb5os
8.44714e-102	0.728266	0.357	0.031	2.36503e-97	CNT	Ddit4l
9.14583e-101	1.12418	0.465	0.053	2.56065e-96	CNT	Sfrp1
3.15071e-99	0.510776	0.287	0.02	8.82136e-95	CNT	Hoxd10
1.19621e-98	0.720129	0.42	0.043	3.34914e-94	CNT	Tfap2b
3.33097e-95	0.9866	0.592	0.093	9.32604e-91	CNT	Tanc1
1.28682e-94	0.656147	0.312	0.025	3.60283e-90	CNT	Megf9
2.61077e-94	0.975589	0.745	0.141	7.30964e-90	CNT	Cd9
1.22091e-93	0.603769	0.268	0.018	3.4183e-89	CNT	Olfm1
4.56431e-91	0.711052	0.433	0.051	1.27792e-86	CNT	Thbs1
5.08504e-90	0.83553	0.465	0.058	1.42371e-85	CNT	Abca13
1.55077e-87	0.774094	0.389	0.042	4.34186e-83	CNT	Cav1
1.76908e-87	0.668465	0.363	0.037	4.95308e-83	CNT	Sdpr
1.2727e-85	1.31873	0.745	0.181	3.5633e-81	CNT	Sgms2
1.24462e-84	0.554709	0.28	0.022	3.48468e-80	CNT	Prom2
1.50017e-81	0.625292	0.268	0.021	4.20018e-77	CNT	Bsnd
1.54288e-79	0.82858	0.535	0.085	4.31974e-75	CNT	Efhd1
2.92297e-77	0.961209	0.688	0.152	8.18374e-73	CNT	Cdh1
1.65317e-74	1.16362	1	0.811	4.62856e-70	CNT	Atp1b1
2.6865e-72	0.688991	0.395	0.051	7.52165e-68	CNT	Tmem72
3.41959e-72	0.701292	0.439	0.063	9.57416e-68	CNT	Slc16a7
3.7581e-72	0.69954	0.395	0.053	1.05219e-67	CNT	Acsl5
6.98461e-72	0.674767	0.344	0.04	1.95555e-67	CNT	Slit2
2.77628e-71	0.4991	0.293	0.029	7.77304e-67	CNT	Ptgs1
1.04473e-67	1.21356	0.994	0.735	2.92505e-63	CNT	Atp1a1
4.49683e-66	0.639201	0.35	0.045	1.25902e-61	CNT	Tesc
1.7988e-65	1.10261	0.611	0.144	5.03628e-61	CNT	Cdo1
5.87537e-65	0.56046	0.28	0.03	1.64499e-60	CNT	Dach1
1.77158e-61	0.747652	0.433	0.071	4.96006e-57	CNT	Krt7
2.63971e-61	0.665231	0.369	0.055	7.39066e-57	CNT	Itgb5
2.79492e-61	0.863418	0.529	0.113	7.82521e-57	CNT	Tmem178
6.93363e-61	0.754601	0.516	0.103	1.94128e-56	CNT	Trim2
8.16376e-61	0.790035	0.618	0.136	2.28569e-56	CNT	Pkm
1.24281e-60	0.609397	0.287	0.033	3.47961e-56	CNT	Casz1
1.2575e-60	0.797879	0.554	0.12	3.52074e-56	CNT	Tmprss2
2.22332e-60	0.869992	1	0.857	6.22486e-56	CNT	Itm2b
2.71442e-60	0.877289	0.49	0.098	7.59985e-56	CNT	Ntn4
9.76101e-60	0.707658	0.541	0.112	2.73289e-55	CNT	Wnk4
1.07314e-58	0.650115	0.439	0.074	3.00459e-54	CNT	Tspan12
3.22603e-57	1.01976	0.739	0.249	9.03225e-53	CNT	Vdr
1.70305e-56	0.611722	0.401	0.066	4.7682e-52	CNT	Pbxip1
4.42353e-56	0.756432	1	1	1.2385e-51	CNT	mt-Co1
1.14147e-55	0.550568	0.255	0.028	3.19587e-51	CNT	Spink8
3.04496e-55	0.755784	0.478	0.097	8.52529e-51	CNT	Pou3f3
2.9256e-54	0.569941	0.306	0.041	8.19109e-50	CNT	Akr1c19
6.55909e-54	0.68284	0.478	0.095	1.83642e-49	CNT	Adgrg1
1.16303e-53	0.840453	0.548	0.131	3.25625e-49	CNT	Acadsb
5.32411e-53	1.02216	0.873	0.391	1.49064e-48	CNT	Cdh16
1.80759e-52	0.743202	0.497	0.107	5.06088e-48	CNT	Gbas
2.75361e-52	0.702221	0.452	0.09	7.70956e-48	CNT	Fzd4
4.03504e-51	0.475706	0.268	0.034	1.12973e-46	CNT	Tmem30b
4.29203e-51	0.693748	0.414	0.079	1.20168e-46	CNT	Prps2
1.46035e-50	0.799909	0.51	0.119	4.08869e-46	CNT	Tsc22d2
5.22157e-50	0.497224	0.293	0.04	1.46194e-45	CNT	Gata3
9.38172e-50	0.917678	0.822	0.328	2.62669e-45	CNT	Txnip
1.64621e-49	0.65428	0.439	0.089	4.60905e-45	CNT	Flnb
5.21674e-49	0.538538	0.293	0.042	1.46058e-44	CNT	Kitl
5.81166e-49	0.560135	0.28	0.038	1.62715e-44	CNT	Pcolce
5.49623e-48	0.882843	0.803	0.324	1.53883e-43	CNT	Wls
1.05373e-46	0.852738	0.675	0.221	2.95022e-42	CNT	Ctnna1
1.72173e-46	0.565831	1	1	4.8205e-42	CNT	mt-Co3
5.07571e-46	0.444929	0.255	0.034	1.4211e-41	CNT	Ildr1
5.24109e-46	0.682429	0.376	0.072	1.4674e-41	CNT	Tbx2
5.98502e-45	0.626834	0.42	0.086	1.67569e-40	CNT	Lgals3
8.68004e-45	0.824401	0.497	0.122	2.43024e-40	CNT	Hes1
9.23469e-45	0.8414	0.771	0.298	2.58553e-40	CNT	Tfcp2l1
1.51175e-43	0.847475	0.573	0.169	4.2326e-39	CNT	Npnt
2.20317e-43	0.873369	0.955	0.695	6.16843e-39	CNT	S100a1
2.50281e-43	0.67117	0.408	0.087	7.00737e-39	CNT	Rragd
3.89392e-43	0.638792	0.682	0.212	1.09022e-38	CNT	Sh3bgrl3
2.00577e-42	0.489793	1	1	5.61576e-38	CNT	mt-Cytb
4.4479e-42	0.837249	0.898	0.505	1.24532e-37	CNT	Sdc4
4.88274e-42	0.682551	0.427	0.098	1.36707e-37	CNT	Hoxd3os1
3.46832e-41	0.679167	0.382	0.082	9.71059e-37	CNT	Emx1
3.82029e-41	0.430511	0.541	0.136	1.06961e-36	CNT	Ppp1r1a
5.78785e-41	0.657944	0.42	0.094	1.62048e-36	CNT	Iqgap1
6.74027e-41	0.472137	0.261	0.039	1.88714e-36	CNT	Pde3b
1.19136e-40	0.544383	1	0.999	3.33556e-36	CNT	mt-Co2
2.55455e-39	0.508516	0.255	0.04	7.15224e-35	CNT	Adcy6
1.57933e-38	0.609743	0.433	0.104	4.42182e-34	CNT	Nfe2l1
4.29365e-38	0.864628	0.752	0.315	1.20213e-33	CNT	Ctsd
5.81922e-37	0.476996	1	1	1.62926e-32	CNT	mt-Atp6
2.09711e-36	0.583264	0.363	0.079	5.87148e-32	CNT	Col18a1
2.4798e-36	0.659342	0.605	0.194	6.94293e-32	CNT	Wsb1
3.19522e-36	0.452854	0.268	0.046	8.94598e-32	CNT	Tmem50b
4.13661e-36	0.631753	0.459	0.124	1.15817e-31	CNT	Cbx5
2.90088e-35	0.57244	0.42	0.102	8.12188e-31	CNT	Tspan8
3.67616e-35	0.794031	0.854	0.532	1.02925e-30	CNT	Atp6v1a
7.37232e-35	0.468053	0.287	0.053	2.0641e-30	CNT	Mfsd7b
1.65096e-34	0.585622	0.376	0.088	4.62235e-30	CNT	Pmepa1
2.64202e-34	0.589752	0.357	0.08	7.39713e-30	CNT	Aqp3
3.51866e-33	0.622266	0.408	0.108	9.85154e-29	CNT	Aqp2
2.75606e-31	0.492246	0.382	0.094	7.71642e-27	CNT	Epcam
5.67635e-31	0.479845	0.312	0.069	1.58926e-26	CNT	Slc25a12
8.87806e-31	0.672777	0.688	0.289	2.48568e-26	CNT	Cnn3
2.04928e-30	0.691197	0.911	0.586	5.73757e-26	CNT	Atp6v0e
2.77535e-30	0.57203	0.382	0.101	7.77042e-26	CNT	Anxa11
3.12998e-30	0.673508	0.739	0.335	8.76333e-26	CNT	Aplp2
1.40695e-29	0.719046	0.669	0.282	3.93917e-25	CNT	Gls
1.45894e-29	0.556343	0.427	0.126	4.08475e-25	CNT	Papss1
1.26292e-28	0.552101	0.382	0.108	3.53593e-24	CNT	Enpp5
3.38036e-28	1.16198	0.369	0.104	9.46434e-24	CNT	Slc12a3
5.30098e-28	0.585431	0.439	0.138	1.48417e-23	CNT	Lman1
1.451e-27	0.526055	0.433	0.133	4.06251e-23	CNT	Maged1
2.68967e-27	0.757822	0.758	0.424	7.53053e-23	CNT	Kcnj16
8.11859e-27	0.465731	0.287	0.066	2.27304e-22	CNT	Stard8
1.17417e-26	0.536401	0.981	0.881	3.28745e-22	CNT	mt-Nd3
2.57157e-26	0.474434	0.312	0.076	7.19988e-22	CNT	Ucp2
2.73802e-26	0.67906	0.758	0.392	7.66591e-22	CNT	Col4a4
6.32577e-26	0.636457	0.567	0.227	1.77109e-21	CNT	Nampt
1.34731e-25	0.577731	0.943	0.764	3.77221e-21	CNT	Atp5a1
4.51703e-25	0.66127	0.65	0.299	1.26468e-20	CNT	Rtn3
6.39057e-25	0.343179	0.255	0.055	1.78923e-20	CNT	Mfsd4
8.66376e-25	0.633597	0.299	0.077	2.42568e-20	CNT	Tbck
9.8139e-25	0.652138	0.911	0.6	2.74769e-20	CNT	Ivns1abp
1.00526e-24	0.371853	0.261	0.057	2.81451e-20	CNT	Apela
1.04514e-24	0.543297	0.465	0.159	2.9262e-20	CNT	Cyfip2
1.08825e-24	0.417458	0.28	0.066	3.04688e-20	CNT	Cd59a
2.17961e-24	0.538896	0.446	0.151	6.10248e-20	CNT	Ptbp3
3.58183e-24	0.345631	1	0.998	1.00284e-19	CNT	mt-Nd4
3.43865e-23	0.565281	0.452	0.157	9.62753e-19	CNT	Acss1
5.14701e-23	0.397591	0.268	0.065	1.44106e-18	CNT	Hspa1b
8.02172e-23	0.550651	0.573	0.236	2.24592e-18	CNT	Ppargc1a
1.02596e-22	0.536306	0.42	0.141	2.87249e-18	CNT	Plxnb2
1.27929e-22	0.535909	0.344	0.102	3.58177e-18	CNT	Nuak2
1.56557e-22	0.478933	0.312	0.088	4.38328e-18	CNT	Tgfbr1
1.7001e-22	0.538396	0.58	0.246	4.75995e-18	CNT	Hadhb
2.25424e-22	0.399935	0.828	0.47	6.31142e-18	CNT	Cst3
3.21619e-22	0.428672	0.261	0.064	9.00469e-18	CNT	Laptm4b
3.94837e-22	0.535755	0.325	0.096	1.10546e-17	CNT	Ddr1
6.54207e-22	0.522983	0.758	0.426	1.83165e-17	CNT	Serinc3
7.85846e-22	0.531717	0.433	0.154	2.20021e-17	CNT	Hif1a
8.52665e-22	0.416247	0.268	0.069	2.38729e-17	CNT	Peli2
3.12758e-21	0.406902	0.293	0.08	8.7566e-17	CNT	Ptprj
3.54602e-21	0.544342	0.433	0.157	9.92815e-17	CNT	Pkhd1
4.19463e-21	0.483649	0.49	0.191	1.17441e-16	CNT	Atp6ap2
4.8309e-21	0.405682	0.274	0.071	1.35256e-16	CNT	Pls3
1.38123e-20	0.656679	0.758	0.47	3.86716e-16	CNT	Pth1r
1.53037e-20	0.42861	0.331	0.1	4.28473e-16	CNT	Anxa4
1.60948e-20	0.51753	0.732	0.377	4.50624e-16	CNT	Ogt
1.74956e-20	0.32924	0.255	0.064	4.89842e-16	CNT	Bcat2
2.47919e-20	0.489921	0.408	0.146	6.94125e-16	CNT	Mtch1
2.94154e-20	0.535364	0.427	0.16	8.23574e-16	CNT	Zmiz1
3.84198e-20	0.569803	0.49	0.204	1.07568e-15	CNT	Clint1
6.20208e-20	0.508982	0.414	0.149	1.73646e-15	CNT	Rnaset2b
1.49999e-19	0.485453	0.592	0.256	4.19968e-15	CNT	Oat
2.24793e-19	0.440833	0.35	0.115	6.29377e-15	CNT	P3h2
3.07776e-19	0.364308	0.433	0.15	8.61711e-15	CNT	Cd24a
3.61054e-19	0.483279	0.745	0.414	1.01088e-14	CNT	Aes
3.98469e-19	0.541214	0.522	0.235	1.11563e-14	CNT	Cpt1a
6.19387e-19	0.33143	0.274	0.076	1.73416e-14	CNT	Bag4
8.37789e-19	0.371367	0.28	0.081	2.34564e-14	CNT	Lrba
1.52733e-18	0.327145	0.255	0.068	4.27622e-14	CNT	Cd82
1.87815e-18	0.447892	0.274	0.081	5.25844e-14	CNT	Amotl2
2.14514e-17	0.429027	0.414	0.157	6.00597e-13	CNT	Ccdc141
2.89951e-17	0.450241	0.408	0.159	8.11805e-13	CNT	Nfe2l2
3.96369e-17	0.426218	0.376	0.138	1.10975e-12	CNT	Dst
5.20021e-17	0.37398	0.452	0.179	1.45596e-12	CNT	Etnk1
6.9524e-17	0.388509	0.389	0.145	1.94653e-12	CNT	Irf2bpl
9.59829e-17	0.475464	0.446	0.185	2.68733e-12	CNT	F11r
1.19944e-16	0.483328	0.586	0.291	3.35818e-12	CNT	Pgrmc1
2.44617e-16	0.295604	1	0.982	6.84879e-12	CNT	mt-Nd2
2.95149e-16	0.41995	0.401	0.159	8.26357e-12	CNT	Paqr5
3.37784e-16	0.434209	0.541	0.251	9.45729e-12	CNT	Rnf128
6.59065e-16	0.410993	0.261	0.081	1.84525e-11	CNT	Gstt3
6.8134e-16	0.409449	0.35	0.13	1.90762e-11	CNT	Pdcd4
7.00646e-16	0.519273	0.586	0.296	1.96167e-11	CNT	Gclc
1.51176e-15	0.467803	0.382	0.15	4.23262e-11	CNT	Tmx2
2.21407e-15	0.25514	1	1	6.19895e-11	CNT	mt-Nd1
2.27289e-15	0.397246	0.357	0.133	6.36364e-11	CNT	Anxa5
2.59062e-15	0.346202	0.274	0.088	7.25322e-11	CNT	Eid1
3.11181e-15	0.466871	0.49	0.23	8.71243e-11	CNT	Bicc1
4.68856e-15	0.370619	0.306	0.107	1.3127e-10	CNT	Sorl1
4.83461e-15	0.351519	0.994	0.907	1.3536e-10	CNT	mt-Nd4l
6.29911e-15	0.380763	0.363	0.139	1.76363e-10	CNT	Plekha1
1.09543e-14	0.379309	0.318	0.115	3.06699e-10	CNT	Aig1
1.4492e-14	0.449127	0.854	0.638	4.05748e-10	CNT	Aldoa
2.03527e-14	0.375506	0.363	0.143	5.69836e-10	CNT	Smco4
2.27943e-14	0.39187	0.287	0.1	6.38195e-10	CNT	Map3k1
1.67269e-13	0.36648	0.28	0.101	4.68319e-09	CNT	Pias2
1.75256e-13	0.282591	0.268	0.091	4.90681e-09	CNT	Nedd9
2.72872e-13	0.339446	0.299	0.111	7.63987e-09	CNT	Macf1
3.03718e-13	0.470561	0.758	0.516	8.50351e-09	CNT	Sdha
3.63596e-13	0.434619	0.567	0.302	1.018e-08	CNT	Tm9sf2
4.48736e-13	0.396234	0.395	0.172	1.25637e-08	CNT	Atp6ap1
4.62898e-13	0.437912	0.815	0.602	1.29602e-08	CNT	Psap
4.8879e-13	0.374246	0.287	0.106	1.36851e-08	CNT	Ndrg2
6.50232e-13	0.454521	0.885	0.626	1.82052e-08	CNT	Hsp90b1
7.55298e-13	0.369452	0.357	0.149	2.11468e-08	CNT	Hadha
1.04396e-12	0.380218	0.293	0.111	2.92287e-08	CNT	Pacsin2
2.55789e-12	0.344543	0.408	0.179	7.16157e-08	CNT	Mgst1
3.20083e-12	0.390173	0.898	0.686	8.96169e-08	CNT	Atp6v1f
3.35357e-12	0.458431	0.401	0.185	9.38932e-08	CNT	Gstt1
3.44848e-12	0.327819	0.261	0.095	9.65504e-08	CNT	Dag1
3.85221e-12	0.435477	0.401	0.191	1.07854e-07	CNT	Clmn
4.60026e-12	0.360661	0.338	0.142	1.28798e-07	CNT	Hnrnpa0
4.62479e-12	0.369598	0.49	0.247	1.29485e-07	CNT	1700020I14Rik
5.74434e-12	0.41331	0.433	0.213	1.6083e-07	CNT	Arhgap24
9.13468e-12	0.288733	0.261	0.096	2.55753e-07	CNT	Rnf152
1.05512e-11	0.26578	0.662	0.399	2.95413e-07	CNT	Laptm4a
1.43007e-11	0.360271	0.752	0.511	4.00392e-07	CNT	Gabarapl1
1.51502e-11	0.345278	0.344	0.15	4.24175e-07	CNT	Tmem135
1.74738e-11	0.379687	0.306	0.125	4.8923e-07	CNT	Mif4gd
1.82339e-11	0.336932	0.573	0.312	5.10512e-07	CNT	Immt
3.1251e-11	0.445215	0.433	0.224	8.74965e-07	CNT	Phldb2
4.14436e-11	0.34748	0.599	0.334	1.16034e-06	CNT	Rabac1
4.78784e-11	0.296125	0.299	0.122	1.3405e-06	CNT	Dmtn
5.10182e-11	0.384923	0.459	0.239	1.42841e-06	CNT	Erbb2ip
5.43667e-11	0.296581	0.369	0.166	1.52216e-06	CNT	Atrx
7.09866e-11	0.362087	0.49	0.261	1.98748e-06	CNT	Prkar1a
8.07991e-11	0.325809	0.631	0.374	2.26221e-06	CNT	Idh2
8.83688e-11	0.350691	0.287	0.117	2.47415e-06	CNT	Rnaset2a
9.08842e-11	0.343157	0.376	0.177	2.54458e-06	CNT	Atp6v1h
1.64638e-10	0.382374	0.344	0.161	4.60953e-06	CNT	Stt3a
1.74475e-10	0.333216	0.637	0.37	4.88494e-06	CNT	Spint2
2.36993e-10	0.282682	0.261	0.102	6.63533e-06	CNT	D630024D03Rik
2.38014e-10	0.32342	0.331	0.151	6.66393e-06	CNT	Elovl7
2.68376e-10	0.365742	0.72	0.465	7.514e-06	CNT	Aco2
2.8203e-10	0.357826	0.611	0.368	7.89627e-06	CNT	Luc7l2
5.48266e-10	0.272447	0.299	0.126	1.53503e-05	CNT	Got1
5.97407e-10	0.376103	0.529	0.307	1.67262e-05	CNT	Serinc1
6.90931e-10	0.402599	0.382	0.197	1.93447e-05	CNT	Got2
7.08978e-10	0.335158	0.306	0.138	1.985e-05	CNT	Sacm1l
9.13367e-10	0.401848	0.357	0.175	2.55725e-05	CNT	Zfp503
1.14852e-09	0.303391	0.401	0.204	3.21563e-05	CNT	Ddx6
1.40356e-09	0.363739	0.586	0.358	3.9297e-05	CNT	Ogdh
1.47319e-09	0.301968	0.522	0.277	4.12464e-05	CNT	Wbp5
1.987e-09	0.386939	0.497	0.285	5.5632e-05	CNT	Irf2bp2
2.07982e-09	0.343777	0.561	0.338	5.82308e-05	CNT	Ezr
2.74367e-09	0.366375	0.382	0.198	7.68172e-05	CNT	Aktip
4.46042e-09	0.349246	0.764	0.552	0.000124883	CNT	Canx
4.66934e-09	0.32067	0.401	0.207	0.000130732	CNT	Idh3a
4.87396e-09	0.426849	0.439	0.249	0.000136461	CNT	Copa
6.02756e-09	0.395994	0.452	0.257	0.00016876	CNT	Tmed7
6.43467e-09	0.300836	0.433	0.234	0.000180158	CNT	Pdhb
7.50645e-09	0.345814	0.656	0.444	0.000210166	CNT	Tmem59
8.62725e-09	0.277053	0.261	0.112	0.000241546	CNT	Lad1
8.64783e-09	0.308994	0.35	0.173	0.000242122	CNT	Wwc1
9.01601e-09	0.322879	0.618	0.397	0.00025243	CNT	Abcd3
1.35388e-08	0.263725	0.35	0.169	0.00037906	CNT	Ccnd1
1.40768e-08	0.307207	0.478	0.268	0.000394121	CNT	Rpn1
1.4543e-08	0.318109	0.599	0.385	0.000407174	CNT	Ywhaq
2.43842e-08	0.353744	0.401	0.223	0.000682708	CNT	Rad21
5.6043e-08	0.357597	0.452	0.265	0.00156909	CNT	Msi2
5.68636e-08	0.334441	0.471	0.28	0.00159207	CNT	Magt1
5.94238e-08	0.269727	0.408	0.212	0.00166375	CNT	Chka
6.69306e-08	0.31636	0.452	0.266	0.00187392	CNT	Pdia6
8.44783e-08	0.278723	0.268	0.125	0.00236522	CNT	Man2a1
9.19154e-08	0.304984	0.306	0.154	0.00257345	CNT	Lin7c
1.26456e-07	0.282834	0.35	0.186	0.00354051	CNT	Cox7a1
1.46382e-07	0.30853	0.446	0.265	0.00409839	CNT	Itgav
1.55416e-07	0.320143	0.338	0.177	0.00435133	CNT	Nbeal1
1.70589e-07	0.254803	0.255	0.117	0.00477614	CNT	Tnrc6b
2.38383e-07	0.347718	0.28	0.142	0.00667424	CNT	Strbp
3.24843e-07	0.308435	0.338	0.18	0.00909497	CNT	Pcmtd1
3.60148e-07	0.285758	0.331	0.179	0.0100834	CNT	Impad1
4.17358e-07	0.297263	0.854	0.703	0.0116852	CNT	Hspa5
4.97993e-07	0.288898	0.299	0.153	0.0139428	CNT	Ptprf
9.67763e-07	0.32655	0.325	0.178	0.0270954	CNT	Itga6
1.13814e-06	0.250037	0.35	0.194	0.0318656	CNT	Nptn
1.21962e-06	0.275444	0.433	0.259	0.034147	CNT	Pum2
1.27171e-06	0.260127	0.758	0.588	0.0356053	CNT	Eif4a2
1.32395e-06	0.307698	0.471	0.307	0.0370679	CNT	Ctnnb1
1.43803e-06	0.254726	0.338	0.185	0.040262	CNT	Tmed9
2.04953e-06	0.288455	0.35	0.201	0.0573828	CNT	Atp6v0a4
2.91102e-06	0.311032	0.287	0.154	0.0815026	CNT	Pigp
3.26016e-06	0.267237	0.452	0.28	0.0912779	CNT	Clcn3
3.4166e-06	0.288838	0.274	0.143	0.095658	CNT	Dek
4.80397e-06	0.262026	0.522	0.348	0.134502	CNT	Echs1
5.69553e-06	0.268737	0.529	0.361	0.159463	CNT	Dazap2
5.75401e-06	0.260049	0.306	0.17	0.161101	CNT	Slc43a2
6.06339e-06	0.28069	0.446	0.286	0.169763	CNT	Kif5b
8.14729e-06	0.295656	0.414	0.263	0.228108	CNT	Gpi1
9.32459e-06	0.277365	0.452	0.301	0.26107	CNT	Chmp5
1.18939e-05	0.258284	0.465	0.295	0.333005	CNT	Pura
1.20118e-05	0.277776	0.312	0.176	0.336307	CNT	Rbbp7
1.2772e-05	0.266062	0.261	0.14	0.357592	CNT	Psmd3
1.61984e-05	0.27972	0.274	0.154	0.453523	CNT	Arf3
7.50752e-05	0.252423	0.268	0.154	1	CNT	Nnt
0.000448917	0.266334	0.325	0.218	1	CNT	Rnf13
0	2.97931	0.951	0.068	0	DCT	Slc12a3
0	1.97901	0.921	0.107	0	DCT	Ppp1r1a
0	1.97262	0.929	0.11	0	DCT	Tmem52b
0	1.96024	0.883	0.122	0	DCT	Tmem213
0	1.84868	0.747	0.061	0	DCT	Pgam2
0	1.79077	0.851	0.099	0	DCT	Kng2
0	1.72049	0.473	0.012	0	DCT	Pvalb
0	1.7047	0.609	0.035	0	DCT	Sfrp1
0	1.67038	0.636	0.038	0	DCT	Abca13
0	1.58027	0.777	0.103	0	DCT	Kcnj1
0	1.37466	0.519	0.028	0	DCT	Ptgfr
4.42578e-306	1.76666	0.641	0.072	1.23913e-301	DCT	Ckb
1.33657e-305	1.96697	0.894	0.173	3.74214e-301	DCT	Egf
4.09886e-301	0.907456	0.302	0.009	1.1476e-296	DCT	Cwh43
1.48138e-297	2.1622	0.962	0.227	4.14756e-293	DCT	Defb1
1.77363e-293	2.34628	0.967	0.27	4.96581e-289	DCT	Wnk1
1.74616e-276	0.955282	0.304	0.011	4.88891e-272	DCT	Uroc1
2.36978e-273	1.25312	0.519	0.049	6.63491e-269	DCT	Slc16a7
5.30283e-246	1.7066	0.788	0.154	1.48469e-241	DCT	Wfdc15b
2.42235e-245	1.48928	0.734	0.13	6.78211e-241	DCT	Hoxd8
9.83321e-226	1.85146	0.932	0.301	2.7531e-221	DCT	Mt1
3.95252e-213	1.40209	0.644	0.107	1.10663e-208	DCT	Clu
8.66462e-212	1.35823	0.677	0.12	2.42592e-207	DCT	Pkm
5.11633e-211	1.59402	0.842	0.226	1.43247e-206	DCT	Umod
8.14177e-211	1.01575	0.413	0.039	2.27953e-206	DCT	Hoxb5os
4.04203e-208	1.84137	0.995	0.728	1.13169e-203	DCT	Atp1a1
2.47364e-201	1.1172	0.636	0.103	6.9257e-197	DCT	Mal
6.70084e-199	1.61102	0.701	0.147	1.8761e-194	DCT	Ier3
2.81003e-196	0.987726	0.41	0.042	7.86753e-192	DCT	Mfsd4
3.05303e-190	0.994405	0.405	0.042	8.54788e-186	DCT	Tmem72
1.05328e-185	1.13784	0.5	0.07	2.94897e-181	DCT	Clcnkb
5.49455e-177	1.21131	0.508	0.079	1.53836e-172	DCT	Pdk4
1.43586e-171	1.22283	0.606	0.11	4.02013e-167	DCT	Wfdc2
3.66627e-169	0.910278	0.299	0.024	1.02648e-164	DCT	Atp4a
1.33632e-168	1.05771	0.484	0.069	3.74142e-164	DCT	Scd2
7.57916e-165	0.863089	0.321	0.03	2.12201e-160	DCT	Pcolce
5.3373e-158	1.42913	0.655	0.17	1.49434e-153	DCT	Sgms2
7.02615e-157	1.08674	0.399	0.052	1.96718e-152	DCT	Mmd
9.03495e-152	1.27474	0.557	0.108	2.52961e-147	DCT	Mt2
7.12105e-144	1.1078	0.516	0.101	1.99375e-139	DCT	Wnk4
2.31329e-141	1.0731	0.995	0.806	6.47674e-137	DCT	Atp1b1
3.92602e-139	0.978657	0.467	0.077	1.09921e-134	DCT	Sostdc1
1.74655e-132	0.89413	0.351	0.046	4.89e-128	DCT	Kcnj10
4.57458e-123	0.974979	0.435	0.078	1.28079e-118	DCT	Efhd1
8.72816e-123	0.919544	0.467	0.087	2.44371e-118	DCT	Cldn8
4.74152e-114	0.8594	0.527	0.122	1.32753e-109	DCT	Slc5a3
4.74777e-106	0.843138	0.359	0.06	1.32928e-101	DCT	Scnn1a
3.65433e-105	1.12873	0.476	0.119	1.02314e-100	DCT	Tfrc
7.1242e-103	1.62916	0.562	0.16	1.99463e-98	DCT	Calb1
1.28267e-101	1.08988	0.84	0.501	3.59123e-97	DCT	Gabarapl1
7.91275e-101	0.833348	0.348	0.061	2.21541e-96	DCT	Pantr1
7.03237e-100	0.878082	0.342	0.059	1.96892e-95	DCT	Tmem65
2.22308e-98	0.966257	0.736	0.296	6.22418e-94	DCT	Nudt4
4.50176e-98	0.891697	0.533	0.145	1.2604e-93	DCT	Cdh1
1.52779e-96	1.03189	0.579	0.175	4.2775e-92	DCT	Fabp3
1.03077e-95	0.776316	0.38	0.073	2.88595e-91	DCT	Mecom
1.64209e-95	0.939846	0.37	0.074	4.59752e-91	DCT	Emx1
1.78294e-94	0.837061	0.965	0.851	4.99188e-90	DCT	Atp5g3
4.66511e-93	0.919152	0.484	0.127	1.30614e-88	DCT	Mrps6
6.19422e-93	0.758271	0.318	0.054	1.73426e-88	DCT	Ermp1
9.5342e-92	0.615271	0.992	0.974	2.66939e-87	DCT	Cox6c
1.69608e-90	0.656529	0.997	0.941	4.74869e-86	DCT	Atp5e
1.90536e-88	1.42956	0.75	0.378	5.33462e-84	DCT	Klk1
2.41476e-88	0.732418	0.315	0.056	6.76084e-84	DCT	Bcat2
1.47055e-85	0.686562	0.266	0.04	4.11726e-81	DCT	Tesc
4.74563e-82	0.731585	0.386	0.085	1.32868e-77	DCT	Epcam
2.91321e-81	0.861647	0.899	0.69	8.15641e-77	DCT	S100a1
4.47961e-81	0.538819	0.997	0.972	1.2542e-76	DCT	Cox4i1
8.27194e-80	0.797382	0.921	0.76	2.31598e-75	DCT	Atp5a1
3.33901e-78	0.744713	1	1	9.34857e-74	DCT	mt-Co1
4.82527e-77	0.69365	0.962	0.855	1.35098e-72	DCT	Itm2b
6.94085e-77	0.705393	0.967	0.844	1.9433e-72	DCT	Atp5b
1.60187e-76	1.07121	0.693	0.321	4.48493e-72	DCT	Txnip
1.87089e-75	0.634854	0.981	0.912	5.2381e-71	DCT	Atp5k
1.8848e-74	0.961947	0.837	0.614	5.27706e-70	DCT	Oxct1
2.2054e-74	0.832918	0.943	0.75	6.17467e-70	DCT	Ldhb
8.74788e-74	0.88058	0.478	0.15	2.44923e-69	DCT	Cyfip2
1.2047e-72	0.777228	0.272	0.051	3.37291e-68	DCT	Lhx1
1.13039e-70	0.592617	0.995	0.921	3.16488e-66	DCT	Atp5g1
1.27792e-70	0.881763	0.424	0.126	3.57793e-66	DCT	Acadsb
2.05871e-67	0.714326	0.829	0.456	5.76399e-63	DCT	Spp1
2.31149e-67	0.710477	0.291	0.06	6.47171e-63	DCT	Hoxd9
2.0255e-66	0.701946	0.948	0.901	5.67101e-62	DCT	Cox5b
5.1444e-66	0.941561	0.685	0.365	1.44033e-61	DCT	Idh2
1.28499e-65	0.672745	0.255	0.048	3.59773e-61	DCT	Mfsd7b
1.85383e-63	0.68055	0.315	0.074	5.19036e-59	DCT	Prps2
2.40946e-62	0.504165	0.995	0.944	6.746e-58	DCT	Uqcr11
1.57307e-61	0.793371	0.448	0.15	4.40429e-57	DCT	Paqr5
4.29283e-61	0.641624	0.94	0.81	1.20191e-56	DCT	Atp5h
4.56438e-61	0.561106	0.978	0.912	1.27793e-56	DCT	Uqcrh
1.04122e-60	0.783241	0.777	0.5	2.91522e-56	DCT	Sdc4
7.0588e-60	0.518667	0.986	0.954	1.97632e-55	DCT	Atp5l
1.29243e-59	0.654683	0.448	0.139	3.61855e-55	DCT	Cd9
5.35825e-57	0.825534	0.522	0.215	1.5002e-52	DCT	Ctnna1
6.53713e-55	0.877084	0.663	0.365	1.83027e-50	DCT	Mgst3
3.09051e-54	0.8883	0.492	0.205	8.65282e-50	DCT	Trpm7
6.36619e-53	0.46092	1	1	1.78241e-48	DCT	mt-Co3
7.45143e-53	0.733637	0.565	0.248	2.08625e-48	DCT	Oat
3.35479e-52	0.784044	0.427	0.161	9.39275e-48	DCT	Larp1b
1.29921e-50	0.664468	0.332	0.099	3.63752e-46	DCT	Ndrg2
5.33434e-50	0.518421	0.897	0.582	1.49351e-45	DCT	Ly6a
1.24387e-49	0.671676	0.34	0.104	3.4826e-45	DCT	Gbas
1.3723e-48	0.725213	0.647	0.363	3.84217e-44	DCT	Spint2
5.38674e-48	0.435769	0.984	0.939	1.50818e-43	DCT	Uqcrq
2.40623e-47	0.528226	0.954	0.864	6.73697e-43	DCT	Ndufa1
5.27493e-47	0.578471	0.927	0.836	1.47687e-42	DCT	Cox7b
3.33622e-46	0.444934	0.978	0.952	9.34076e-42	DCT	Cox7a2
1.65373e-45	0.587882	0.94	0.857	4.63012e-41	DCT	Slc25a5
1.89215e-44	0.503758	0.418	0.143	5.29763e-40	DCT	Cd24a
5.87352e-44	0.59461	0.389	0.136	1.64447e-39	DCT	Aif1l
9.0775e-43	0.714741	0.342	0.119	2.54152e-38	DCT	Got1
1.31304e-41	0.500112	0.927	0.822	3.67624e-37	DCT	Ndufb9
1.53242e-41	0.680033	0.277	0.082	4.29047e-37	DCT	Usp53
7.0317e-40	0.350889	0.995	0.972	1.96874e-35	DCT	Cox8a
1.18541e-39	0.735058	0.465	0.222	3.31891e-35	DCT	Nampt
2.05321e-39	0.692055	0.717	0.498	5.74859e-35	DCT	Ndufv2
7.51675e-39	0.634843	0.334	0.121	2.10454e-34	DCT	Cbx5
3.04018e-38	0.737382	0.326	0.117	8.51191e-34	DCT	Tsc22d2
3.14869e-38	0.721106	0.481	0.231	8.8157e-34	DCT	Ppargc1a
3.17823e-38	0.662333	0.682	0.46	8.89841e-34	DCT	Aco2
8.45952e-38	0.575424	0.293	0.095	2.3685e-33	DCT	Pou3f3
3.33431e-36	0.830797	0.701	0.524	9.33539e-32	DCT	Kl
8.71166e-36	0.404388	0.978	0.957	2.43909e-31	DCT	Cox6b1
1.39945e-35	0.685827	0.557	0.312	3.91819e-31	DCT	Ctsd
2.19331e-35	0.392176	0.845	0.665	6.14082e-31	DCT	Actg1
8.04119e-35	0.664077	0.473	0.242	2.25137e-30	DCT	Hadhb
1.63399e-34	0.659212	0.321	0.123	4.57484e-30	DCT	Papss1
9.12595e-33	0.671019	0.361	0.157	2.55508e-28	DCT	Lhx1os
2.6898e-31	0.773316	0.606	0.392	7.5309e-27	DCT	Zfp36l1
5.01993e-31	0.412759	0.454	0.21	1.40548e-26	DCT	Sh3bgrl3
5.39856e-31	0.594633	0.69	0.503	1.51149e-26	DCT	1110001J03Rik
6.99487e-31	0.494044	0.272	0.092	1.95842e-26	DCT	Iqgap1
1.00304e-30	0.678879	0.755	0.614	2.8083e-26	DCT	Ubc
6.53018e-30	0.524856	0.283	0.102	1.82832e-25	DCT	Nfe2l1
6.77001e-30	0.512587	0.783	0.644	1.89547e-25	DCT	Ndufa11
1.20623e-29	0.494427	0.807	0.695	3.3772e-25	DCT	Atp5f1
2.01331e-29	0.517552	0.859	0.745	5.63688e-25	DCT	Atp5o
3.00381e-29	0.347483	0.965	0.924	8.41008e-25	DCT	Usmg5
5.16322e-29	0.670065	0.601	0.412	1.4456e-24	DCT	Aes
1.19505e-28	0.529842	0.739	0.585	3.34591e-24	DCT	Atp6v0e
2.55106e-28	0.361265	0.965	0.91	7.14245e-24	DCT	Ndufa13
2.85851e-28	0.313175	0.986	0.954	8.00327e-24	DCT	Uqcr10
4.45067e-28	0.563584	0.323	0.137	1.2461e-23	DCT	Hnrnpa0
4.64434e-28	0.390526	0.929	0.852	1.30032e-23	DCT	Ndufc1
5.14358e-28	0.637596	0.394	0.193	1.4401e-23	DCT	Raly
7.64429e-28	0.543012	0.353	0.153	2.14025e-23	DCT	Acss1
1.05338e-27	0.541553	0.272	0.103	2.94925e-23	DCT	Sorl1
1.72221e-27	0.539982	0.486	0.269	4.82185e-23	DCT	1700011H14Rik
2.2447e-27	0.479406	0.84	0.72	6.28472e-23	DCT	Ndufb11
2.70694e-27	0.682968	0.356	0.153	7.57889e-23	DCT	Btg2
9.89301e-27	0.38639	0.962	0.932	2.76984e-22	DCT	Atp5j2
1.05078e-26	0.537268	0.671	0.513	2.94197e-22	DCT	Sdha
1.4731e-26	0.552619	0.427	0.225	4.12438e-22	DCT	Lsm6
2.07581e-26	0.3629	0.916	0.884	5.81185e-22	DCT	Ndufa3
2.79164e-26	0.6331	0.454	0.26	7.81605e-22	DCT	Msi2
7.63818e-26	0.410981	0.932	0.881	2.13854e-21	DCT	mt-Nd3
8.64863e-26	0.53328	0.258	0.1	2.42144e-21	DCT	Wbp1l
9.32777e-26	0.32042	0.989	0.965	2.61159e-21	DCT	Cox7c
5.30351e-25	0.302345	1	0.999	1.48488e-20	DCT	mt-Co2
2.54485e-24	0.507657	0.31	0.135	7.12506e-20	DCT	Dst
6.05022e-24	0.539589	0.633	0.474	1.69394e-19	DCT	Prdx2
2.10074e-23	0.447125	0.761	0.636	5.88165e-19	DCT	Aldoa
5.48954e-23	0.519358	0.277	0.118	1.53696e-18	DCT	Smagp
1.31307e-22	0.320683	0.967	0.91	3.67634e-18	DCT	2010107E04Rik
1.44443e-22	0.50552	0.361	0.176	4.04411e-18	DCT	Etnk1
1.81213e-22	0.412216	0.323	0.145	5.0736e-18	DCT	S100a13
4.69694e-22	0.543422	0.62	0.471	1.31505e-17	DCT	Bag1
7.29583e-22	0.505496	0.361	0.183	2.04269e-17	DCT	Selm
1.03465e-21	0.568587	0.307	0.146	2.89682e-17	DCT	Hadha
1.58858e-21	0.338067	0.959	0.935	4.44772e-17	DCT	Atp5j
1.7166e-21	0.469102	0.717	0.582	4.80613e-17	DCT	Cyc1
3.71587e-21	0.497659	0.383	0.204	1.04037e-16	DCT	Pttg1
1.23194e-20	0.556301	0.399	0.233	3.44918e-16	DCT	Cpt1a
1.91064e-20	0.538056	0.304	0.149	5.3494e-16	DCT	Nnt
2.64393e-20	0.437108	0.799	0.732	7.40247e-16	DCT	Slc25a3
2.95683e-20	0.540249	0.31	0.154	8.27854e-16	DCT	Becn1
4.46655e-20	0.492904	0.511	0.334	1.25054e-15	DCT	Aplp2
1.27526e-19	0.408649	0.802	0.713	3.57046e-15	DCT	Ndufa12
4.24897e-19	0.405424	0.772	0.68	1.18963e-14	DCT	Ndufs5
5.46436e-19	0.465407	0.63	0.484	1.52991e-14	DCT	Mdh2
1.34668e-18	0.482531	0.562	0.421	3.77043e-14	DCT	Uqcc2
2.49154e-18	0.5027	0.495	0.332	6.9758e-14	DCT	Rabac1
3.04985e-18	0.375775	0.834	0.785	8.53896e-14	DCT	Ndufa5
3.57764e-18	0.476798	0.486	0.327	1.00167e-13	DCT	Ctsb
6.80193e-18	0.336361	0.927	0.917	1.9044e-13	DCT	Uqcrb
1.61881e-17	0.308918	0.967	0.936	4.53234e-13	DCT	Cox6a1
3.3217e-17	0.473491	0.516	0.359	9.30008e-13	DCT	Ppib
1.03651e-16	0.344558	0.726	0.617	2.90201e-12	DCT	Bsg
1.11643e-16	0.464005	0.59	0.455	3.12578e-12	DCT	Uqcrc1
1.34057e-16	0.286646	0.688	0.56	3.75334e-12	DCT	Cd81
2.67814e-16	0.314473	0.861	0.789	7.49827e-12	DCT	Atp5d
3.81709e-16	0.411141	0.764	0.683	1.06871e-11	DCT	Ndufb7
3.94399e-16	0.462091	0.533	0.409	1.10424e-11	DCT	Pdha1
4.23299e-16	0.511074	0.443	0.3	1.18515e-11	DCT	Rtn3
4.64547e-16	0.511698	0.315	0.174	1.30064e-11	DCT	Itga6
6.03777e-16	0.304898	0.899	0.867	1.69045e-11	DCT	Cox5a
8.50386e-16	0.521082	0.348	0.205	2.38091e-11	DCT	Acsl1
1.45949e-15	0.476365	0.269	0.138	4.08627e-11	DCT	Lman1
3.13848e-15	0.411854	0.321	0.177	8.78712e-11	DCT	Mgst1
3.72816e-15	0.487979	0.541	0.404	1.04381e-10	DCT	Ndufs3
4.33247e-15	0.329672	0.851	0.797	1.21301e-10	DCT	Ndufb8
4.55459e-15	0.397101	0.28	0.143	1.2752e-10	DCT	Slc38a2
4.71731e-15	0.425915	0.541	0.402	1.32075e-10	DCT	Ndufs2
1.24537e-14	0.473058	0.272	0.145	3.48677e-10	DCT	Sppl2a
1.27475e-14	0.360418	0.736	0.661	3.56904e-10	DCT	Sdhb
1.35289e-14	0.352769	0.769	0.686	3.78781e-10	DCT	Atp6v1f
1.69665e-14	0.43055	0.264	0.137	4.75028e-10	DCT	Psmd3
2.17113e-14	0.387668	0.312	0.165	6.07872e-10	DCT	Ccnd1
2.43286e-14	0.393116	0.53	0.394	6.81152e-10	DCT	Cdh16
4.43084e-14	0.334936	0.766	0.687	1.24055e-09	DCT	Ndufb5
4.83734e-14	0.465377	0.465	0.346	1.35436e-09	DCT	Echs1
9.83115e-14	0.425083	0.451	0.327	2.75253e-09	DCT	Wls
1.26287e-13	0.382619	0.628	0.53	3.53578e-09	DCT	Ndufs8
1.67476e-13	0.376648	0.658	0.574	4.68898e-09	DCT	Higd1a
2.29361e-13	0.276912	0.902	0.839	6.42164e-09	DCT	Minos1
8.73977e-13	0.439511	0.272	0.152	2.44696e-08	DCT	Coq7
1.03652e-12	0.475537	0.337	0.214	2.90204e-08	DCT	Aldh1l1
3.15184e-12	0.449802	0.285	0.168	8.82453e-08	DCT	Chp1
4.09047e-12	0.459861	0.312	0.195	1.14525e-07	DCT	Got2
5.71214e-12	0.502772	0.519	0.412	1.59929e-07	DCT	Tob1
8.47779e-12	0.392062	0.307	0.185	2.37361e-07	DCT	F11r
8.49598e-12	0.32062	0.785	0.744	2.3787e-07	DCT	Ndufb2
9.09554e-12	0.357689	0.421	0.275	2.54657e-07	DCT	Wbp5
1.02238e-11	0.337155	0.44	0.292	2.86245e-07	DCT	Sepw1
2.02971e-11	0.372573	0.264	0.149	5.68279e-07	DCT	Rnaset2b
3.88415e-11	0.489034	0.478	0.38	1.08749e-06	DCT	Ogt
6.47689e-11	0.286271	0.717	0.662	1.8134e-06	DCT	Uqcrfs1
7.35442e-11	0.413051	0.489	0.385	2.05909e-06	DCT	Ywhaq
8.17428e-11	0.391927	0.299	0.184	2.28863e-06	DCT	Gstt1
9.26795e-11	0.379735	0.269	0.16	2.59484e-06	DCT	Zmiz1
1.03473e-10	0.419396	0.454	0.358	2.89705e-06	DCT	Ogdh
1.61235e-10	0.381305	0.253	0.146	4.51426e-06	DCT	Mtch1
2.06466e-10	0.400029	0.28	0.172	5.78064e-06	DCT	Wwc1
2.22298e-10	0.25647	0.812	0.763	6.2239e-06	DCT	Ndufab1
3.03574e-10	0.362686	0.307	0.196	8.49947e-06	DCT	Aktip
3.51056e-10	0.381104	0.511	0.426	9.82887e-06	DCT	Kcnj16
3.79778e-10	0.285846	0.774	0.74	1.0633e-05	DCT	Ndufb10
4.59893e-10	0.415232	0.277	0.172	1.28761e-05	DCT	Phpt1
4.93654e-10	0.254451	0.269	0.151	1.38213e-05	DCT	Egr1
5.22841e-10	0.355107	0.418	0.307	1.46385e-05	DCT	Ndufv1
7.53165e-10	0.420098	0.353	0.248	2.10871e-05	DCT	Copa
7.98093e-10	0.31749	0.674	0.603	2.2345e-05	DCT	Psap
8.23494e-10	0.344616	0.264	0.158	2.30562e-05	DCT	Pkhd1
8.36827e-10	0.314432	0.446	0.326	2.34295e-05	DCT	Tspo
1.13561e-09	0.360115	0.511	0.421	3.17947e-05	DCT	Pgam1
1.8252e-09	0.299943	0.666	0.59	5.11019e-05	DCT	Ndufa8
2.11739e-09	0.433908	0.321	0.211	5.92828e-05	DCT	Chka
2.50056e-09	0.344807	0.391	0.284	7.00107e-05	DCT	Irf2bp2
6.91928e-09	0.349551	0.389	0.288	0.000193726	DCT	Uqcrc2
8.60459e-09	0.305661	0.253	0.153	0.000240911	DCT	Ptbp3
1.03334e-08	0.364207	0.302	0.204	0.000289314	DCT	Acadvl
1.72035e-08	0.361108	0.405	0.313	0.000481664	DCT	Immt
2.55315e-08	0.37409	0.258	0.165	0.00071483	DCT	Gm10250
2.80161e-08	0.382806	0.356	0.262	0.000784395	DCT	Gpi1
2.96544e-08	0.373027	0.359	0.264	0.000830263	DCT	Hcfc1r1
3.47383e-08	0.401065	0.372	0.28	0.000972604	DCT	Pnrc1
3.73966e-08	0.365765	0.386	0.294	0.00104703	DCT	Pura
5.58468e-08	0.292394	0.522	0.445	0.0015636	DCT	Tmem59
6.02424e-08	0.337008	0.277	0.182	0.00168667	DCT	Tra2a
7.85252e-08	0.370783	0.299	0.209	0.00219855	DCT	Cobll1
8.04608e-08	0.348063	0.299	0.205	0.00225274	DCT	Chmp4b
1.02866e-07	0.256233	0.747	0.712	0.00288004	DCT	2410015M20Rik
1.09297e-07	0.323717	0.394	0.303	0.00306011	DCT	Tfcp2l1
2.1813e-07	0.314708	0.486	0.411	0.00610721	DCT	Pnkd
2.81851e-07	0.291538	0.535	0.454	0.00789125	DCT	Eno1
4.57751e-07	0.265624	0.584	0.533	0.0128161	DCT	Ghitm
4.68558e-07	0.368081	0.293	0.212	0.0131187	DCT	Mtx2
5.54759e-07	0.363829	0.41	0.338	0.0155321	DCT	Pim3
8.80911e-07	0.314927	0.429	0.359	0.0246637	DCT	Mcee
9.93327e-07	0.301937	0.332	0.248	0.0278112	DCT	Ostf1
1.1036e-06	0.307612	0.378	0.293	0.0308985	DCT	Cnn3
1.69624e-06	0.276358	0.62	0.59	0.0474913	DCT	Eif4a2
1.77876e-06	0.355392	0.285	0.208	0.0498017	DCT	Idh3a
2.55709e-06	0.314391	0.285	0.207	0.0715935	DCT	Gm44386
4.26646e-06	0.319816	0.31	0.234	0.119452	DCT	Pdhb
4.48342e-06	0.256371	0.386	0.304	0.125527	DCT	Sri
7.24895e-06	0.271636	0.253	0.178	0.202956	DCT	Tnrc6a
8.30253e-06	0.327087	0.269	0.196	0.232454	DCT	Arl3
8.38472e-06	0.31589	0.307	0.234	0.234755	DCT	Arhgap5
9.42886e-06	0.310822	0.571	0.545	0.263989	DCT	Hspa9
1.05405e-05	0.265073	0.272	0.198	0.295114	DCT	Camta1
1.6938e-05	0.259145	0.329	0.256	0.474229	DCT	Idh3b
2.34922e-05	0.265682	0.364	0.298	0.657735	DCT	Gclc
2.82042e-05	0.264211	0.383	0.321	0.78966	DCT	Srp14
3.61819e-05	0.283413	0.321	0.256	1	DCT	Vdr
4.59502e-05	0.266006	0.315	0.249	1	DCT	1700020I14Rik
6.16717e-05	0.278925	0.446	0.395	1	DCT	Tmem106b
7.32424e-05	0.283098	0.334	0.276	1	DCT	Dld
0.000106821	0.250273	0.255	0.192	1	DCT	Arfgef1
0.0001126	0.334771	0.272	0.209	1	DCT	Zfp36l2
0.000120415	0.270471	0.435	0.389	1	DCT	Phyh
0.000136741	0.345007	0.361	0.314	1	DCT	Usp2
0.000227642	0.322057	0.272	0.217	1	DCT	Ndufa9
0.000279634	0.254481	0.473	0.445	1	DCT	Pet100
0.000351262	0.289768	0.38	0.342	1	DCT	2310036O22Rik
0.000406007	0.265768	0.375	0.337	1	DCT	Tspan3
0.000472769	0.274359	0.348	0.302	1	DCT	Chmp5
0.000640777	0.257882	0.272	0.22	1	DCT	Mkks
0.000746385	0.305532	0.329	0.287	1	DCT	Ubl3
0.000762399	0.27645	0.342	0.295	1	DCT	Pgrmc1
0.00151792	0.25731	0.342	0.305	1	DCT	Sucla2
0.00279991	0.278066	0.367	0.341	1	DCT	Ezr
0.00585593	0.289782	0.28	0.251	1	DCT	Paics
0.00687778	1.17849	0.432	0.448	1	DCT	S100g
0.00744843	0.272867	0.302	0.271	1	DCT	Rpn1
0	3.69167	0.991	0.027	0	CD-IC	Atp6v1g3
0	2.10978	0.64	0.004	0	CD-IC	Aqp6
0	1.91295	0.793	0.004	0	CD-IC	Hepacam2
0	1.77682	0.559	0.003	0	CD-IC	Slc4a1
0	1.74844	0.82	0.033	0	CD-IC	Rhbg
0	1.71534	0.405	0.005	0	CD-IC	Slc26a4
0	1.66369	0.748	0.003	0	CD-IC	Atp6v0d2
0	1.43342	0.532	0.004	0	CD-IC	Kit
0	1.42424	0.685	0.003	0	CD-IC	Atp6v1c2
0	1.42197	0.694	0.012	0	CD-IC	Oxgr1
0	1.36183	0.667	0.016	0	CD-IC	Tmem117
0	1.33621	0.766	0.023	0	CD-IC	Atp6v1b1
0	1.15289	0.514	0.002	0	CD-IC	Foxi1
0	1.14164	0.495	0.001	0	CD-IC	Slc4a9
0	1.09552	0.514	0.001	0	CD-IC	Avpr1a
0	1.02463	0.468	0.006	0	CD-IC	Rcan2
0	0.962569	0.27	0.002	0	CD-IC	Hmx2
0	0.938225	0.523	0.012	0	CD-IC	Pros1
0	0.879619	0.351	0.001	0	CD-IC	Dmrt2
0	0.785268	0.378	0.003	0	CD-IC	Guca2a
0	0.767765	0.279	0.001	0	CD-IC	Insrr
0	0.617907	0.27	0	0	CD-IC	2610016A17Rik
3.54903e-304	1.58263	0.649	0.024	9.93657e-300	CD-IC	Serpinb9
1.13492e-303	0.717476	0.387	0.006	3.17755e-299	CD-IC	Plcg2
2.34484e-292	1.83121	0.64	0.024	6.56508e-288	CD-IC	Spink8
9.1722e-289	0.695387	0.297	0.003	2.56803e-284	CD-IC	Tmem61
5.81696e-243	1.23593	0.622	0.028	1.62863e-238	CD-IC	Ckmt1
7.40532e-237	0.873873	0.45	0.014	2.07334e-232	CD-IC	Serpinb6b
1.50014e-229	0.927543	0.477	0.016	4.20009e-225	CD-IC	Plet1
2.31411e-229	0.529687	0.279	0.004	6.47905e-225	CD-IC	Plagl1
2.00582e-217	1.2312	0.595	0.03	5.6159e-213	CD-IC	Ociad2
1.00527e-211	1.8647	0.703	0.044	2.81455e-207	CD-IC	Adgrf5
2.59368e-200	0.544432	0.261	0.004	7.2618e-196	CD-IC	9130008F23Rik
3.2684e-195	0.613934	0.333	0.009	9.15086e-191	CD-IC	Epb41l2
5.82723e-179	1.16063	0.604	0.038	1.63151e-174	CD-IC	Alcam
5.13491e-173	1.10623	0.739	0.058	1.43767e-168	CD-IC	Rhcg
4.12784e-153	1.3709	0.793	0.08	1.15571e-148	CD-IC	Clcnkb
1.0043e-150	0.658502	0.36	0.015	2.81185e-146	CD-IC	Ybx2
2.17623e-150	1.36185	0.802	0.084	6.09302e-146	CD-IC	Efhd1
2.10595e-148	1.40656	0.847	0.094	5.89623e-144	CD-IC	Cldn8
1.19003e-141	0.99838	0.468	0.028	3.33185e-137	CD-IC	Emb
2.07593e-141	0.856548	0.514	0.034	5.81219e-137	CD-IC	Zfhx3
1.33276e-138	1.94001	0.955	0.146	3.73147e-134	CD-IC	Tmem213
3.62696e-138	0.518685	0.261	0.008	1.01548e-133	CD-IC	Parm1
5.30856e-134	1.19632	0.793	0.089	1.48629e-129	CD-IC	Epcam
7.23214e-132	0.632092	0.387	0.02	2.02485e-127	CD-IC	Exoc3l4
1.39685e-131	0.955782	0.495	0.034	3.91091e-127	CD-IC	Rgs2
1.66121e-120	0.712411	0.45	0.03	4.65106e-116	CD-IC	St14
2.89093e-118	1.1586	0.685	0.076	8.09404e-114	CD-IC	Col18a1
7.77413e-118	0.584229	0.342	0.017	2.1766e-113	CD-IC	Blnk
2.29781e-117	1.25809	0.748	0.096	6.43341e-113	CD-IC	Anxa4
4.08176e-115	1.45601	0.874	0.137	1.14281e-110	CD-IC	Aif1l
5.16817e-115	1.14708	0.694	0.082	1.44699e-110	CD-IC	Foxp1
1.88621e-114	0.994092	0.64	0.065	5.28102e-110	CD-IC	Scnn1a
6.38646e-113	1.46419	0.676	0.077	1.78808e-108	CD-IC	Aqp3
2.72241e-110	0.9842	0.559	0.053	7.62221e-106	CD-IC	Sox4
1.74647e-106	0.586244	0.288	0.014	4.88976e-102	CD-IC	Serpinb1a
1.14483e-105	0.57156	0.288	0.014	3.2053e-101	CD-IC	Irs1
8.09005e-104	1.90718	0.901	0.188	2.26505e-99	CD-IC	Pam
1.2637e-102	0.979929	0.667	0.079	3.53812e-98	CD-IC	Mecom
6.30485e-100	1.42812	0.649	0.085	1.76523e-95	CD-IC	Mme
1.26064e-94	1.50267	0.883	0.187	3.52955e-90	CD-IC	Atp6ap2
2.54188e-92	0.888163	0.495	0.05	7.11676e-88	CD-IC	Ralgapa2
4.56837e-92	0.869588	0.604	0.071	1.27905e-87	CD-IC	Krt7
1.08601e-91	0.934121	0.486	0.048	3.04061e-87	CD-IC	Slc35g1
1.27028e-91	0.810951	0.459	0.043	3.55654e-87	CD-IC	Sh3bgrl2
1.71072e-91	0.765223	0.297	0.017	4.78967e-87	CD-IC	Car15
2.17261e-89	0.88513	0.577	0.066	6.08287e-85	CD-IC	Cav2
5.20663e-89	0.554923	0.333	0.022	1.45775e-84	CD-IC	Foxq1
4.76759e-88	0.694704	0.459	0.043	1.33483e-83	CD-IC	Cldn7
1.17135e-86	1.38297	0.703	0.117	3.27955e-82	CD-IC	Hexb
2.09475e-83	1.64008	0.937	0.288	5.86487e-79	CD-IC	Pgrmc1
6.30145e-83	0.976983	0.613	0.08	1.76428e-78	CD-IC	Scd2
1.31346e-82	1.14292	0.811	0.153	3.67743e-78	CD-IC	Cdh1
5.07911e-82	0.931405	0.622	0.086	1.42205e-77	CD-IC	Pde1a
1.90365e-81	0.930809	0.459	0.048	5.32985e-77	CD-IC	Mal2
1.53319e-80	0.540771	0.306	0.021	4.29262e-76	CD-IC	Kcnq1
1.98708e-78	0.907519	0.604	0.085	5.56343e-74	CD-IC	Itpr2
5.9783e-77	0.54431	0.315	0.023	1.6738e-72	CD-IC	Jag1
1.48961e-76	0.652363	0.306	0.022	4.17062e-72	CD-IC	Bsnd
3.175e-75	0.654567	0.378	0.035	8.88937e-71	CD-IC	Cds1
2.123e-74	0.685395	0.369	0.034	5.94397e-70	CD-IC	Tmem30b
2.14117e-74	0.768961	0.55	0.073	5.99484e-70	CD-IC	Bag4
2.37019e-74	1.42217	0.946	0.298	6.63607e-70	CD-IC	Tfcp2l1
6.05587e-74	0.676491	0.541	0.068	1.69552e-69	CD-IC	Phlda1
1.13304e-73	1.45584	0.802	0.18	3.17228e-69	CD-IC	Car12
4.2702e-73	0.997162	0.595	0.092	1.19557e-68	CD-IC	Rnf152
4.51439e-73	1.19656	0.766	0.168	1.26394e-68	CD-IC	Atp6ap1
6.20269e-73	1.78011	0.982	0.532	1.73663e-68	CD-IC	Atp6v1a
1.216e-72	0.692386	0.423	0.045	3.40455e-68	CD-IC	Tmem50b
2.96372e-71	0.848339	0.477	0.058	8.29783e-67	CD-IC	Kctd12
2.19359e-70	0.555789	0.324	0.028	6.14162e-66	CD-IC	Tdrp
5.40506e-68	0.925661	0.739	0.137	1.51331e-63	CD-IC	Pkm
6.68957e-68	0.632633	0.324	0.028	1.87295e-63	CD-IC	Dsp
8.88613e-68	1.68516	0.892	0.252	2.48794e-63	CD-IC	Defb1
2.60426e-67	0.651846	0.387	0.04	7.29142e-63	CD-IC	Hoxb9
1.03948e-65	0.716992	0.387	0.041	2.91033e-61	CD-IC	Slit2
2.75636e-65	0.882173	0.748	0.145	7.71725e-61	CD-IC	Cd9
7.188e-65	0.599427	0.405	0.045	2.0125e-60	CD-IC	Gstm2
3.34339e-63	0.607894	0.342	0.034	9.36083e-59	CD-IC	Abr
7.2545e-62	0.405203	0.261	0.02	2.03111e-57	CD-IC	Olfm1
1.76966e-61	0.479301	0.297	0.026	4.95469e-57	CD-IC	Etl4
6.54985e-61	1.26532	0.793	0.211	1.83383e-56	CD-IC	Aldh1l1
9.83207e-61	0.499636	0.279	0.024	2.75278e-56	CD-IC	2020-09-09
2.77278e-60	0.786141	0.604	0.106	7.76323e-56	CD-IC	Enpp5
1.40228e-59	1.06495	0.757	0.177	3.92609e-55	CD-IC	Etnk1
9.94242e-59	0.518987	0.261	0.021	2.78368e-54	CD-IC	Rasl11a
1.5759e-58	0.509209	0.477	0.066	4.41219e-54	CD-IC	Gng11
3.06967e-58	0.489579	0.27	0.023	8.59448e-54	CD-IC	Slc16a5
1.76439e-57	0.767547	0.532	0.087	4.93994e-53	CD-IC	Rragd
2.24655e-57	1.21483	1	0.858	6.2899e-53	CD-IC	Itm2b
6.93768e-57	0.838395	0.703	0.15	1.94241e-52	CD-IC	Ptbp3
1.02331e-56	0.541532	0.27	0.024	2.86507e-52	CD-IC	Sptbn2
1.18142e-56	1.08352	0.712	0.168	3.30773e-52	CD-IC	Dmxl1
1.41294e-56	1.37946	0.964	0.398	3.95594e-52	CD-IC	Car2
3.08077e-56	0.549198	0.36	0.041	8.62555e-52	CD-IC	Gata3
9.2695e-56	0.607412	0.324	0.034	2.59528e-51	CD-IC	Ehf
1.26194e-55	0.844436	0.649	0.13	3.53318e-51	CD-IC	Anxa5
1.3031e-55	0.668089	0.432	0.06	3.64843e-51	CD-IC	Clstn1
1.51094e-55	0.868544	0.703	0.15	4.23032e-51	CD-IC	Hoxd8
4.49569e-55	0.673546	0.441	0.063	1.2587e-50	CD-IC	Laptm4b
4.63036e-55	0.541035	0.324	0.034	1.29641e-50	CD-IC	Casz1
6.02341e-55	0.783931	0.505	0.082	1.68643e-50	CD-IC	Cpeb2
1.47346e-54	0.702551	0.486	0.075	4.1254e-50	CD-IC	Ucp2
3.64251e-54	0.521601	0.306	0.031	1.01983e-49	CD-IC	Sgpp2
8.04312e-54	0.48639	0.306	0.032	2.25191e-49	CD-IC	Sowahc
1.68304e-53	1.00189	0.748	0.196	4.71219e-49	CD-IC	Atp6v0a4
2.11518e-52	0.869234	0.622	0.12	5.92207e-48	CD-IC	Mal
2.32829e-52	0.462351	0.288	0.029	6.51875e-48	CD-IC	Klhdc8a
7.47849e-52	0.89569	0.613	0.122	2.09383e-47	CD-IC	Hes1
2.36322e-51	0.613098	0.333	0.039	6.61656e-47	CD-IC	Arl4d
1.70846e-50	1.06	0.802	0.25	4.78334e-46	CD-IC	Eps8
3.00027e-50	0.956281	0.685	0.166	8.40015e-46	CD-IC	Slc43a2
1.1488e-49	1.1529	0.892	0.33	3.2164e-45	CD-IC	Txnip
1.0988e-48	0.566077	0.333	0.04	3.07643e-44	CD-IC	Scnn1b
7.58771e-48	0.529981	0.414	0.062	2.12441e-43	CD-IC	Wdr72
1.3358e-47	0.586069	0.36	0.048	3.73997e-43	CD-IC	Twsg1
1.53801e-47	0.669534	0.45	0.074	4.30611e-43	CD-IC	Arhgap18
1.24914e-46	1.02984	0.856	0.305	3.49734e-42	CD-IC	Atp6v1d
2.38755e-46	1.02693	0.793	0.261	6.68465e-42	CD-IC	Itgav
1.89768e-44	1.09256	0.847	0.335	5.31311e-40	CD-IC	Aplp2
2.13567e-44	0.436512	0.324	0.041	5.97945e-40	CD-IC	Hk1
6.2168e-44	0.526559	0.369	0.054	1.74058e-39	CD-IC	Iqgap2
6.91153e-44	1.09558	0.964	0.587	1.93509e-39	CD-IC	Atp6v0e
2.06285e-43	0.606928	0.532	0.105	5.77557e-39	CD-IC	Nfe2l1
3.30508e-43	0.512728	0.297	0.037	9.25357e-39	CD-IC	Krt18
4.36852e-43	0.730273	0.532	0.111	1.2231e-38	CD-IC	Fam63a
5.11132e-42	0.653618	0.351	0.051	1.43107e-37	CD-IC	Trib1
1.17394e-41	0.479289	0.369	0.056	3.28678e-37	CD-IC	Acsl5
1.53075e-41	0.695376	0.559	0.122	4.28579e-37	CD-IC	Tmprss2
1.68383e-41	0.983448	0.73	0.227	4.71439e-37	CD-IC	Lsm6
1.82298e-41	0.581154	0.441	0.079	5.10398e-37	CD-IC	Ptprj
2.55897e-41	0.717013	0.649	0.156	7.1646e-37	CD-IC	Btg2
2.87775e-41	0.432979	0.315	0.042	8.05711e-37	CD-IC	Fam3c
4.95381e-41	0.437945	0.27	0.032	1.38697e-36	CD-IC	BC023829
3.18316e-40	0.683428	0.396	0.068	8.91222e-36	CD-IC	Pbxip1
4.97769e-40	0.630249	0.423	0.076	1.39365e-35	CD-IC	Prkcd
5.42423e-40	0.560055	0.306	0.042	1.51868e-35	CD-IC	B4galt6
5.91756e-39	0.492188	0.342	0.052	1.6568e-34	CD-IC	Grb10
1.33628e-38	0.586669	0.441	0.082	3.74132e-34	CD-IC	Prss23
1.41886e-38	1.205	0.901	0.426	3.97253e-34	CD-IC	Serinc3
2.61443e-38	0.890532	0.595	0.141	7.31987e-34	CD-IC	Tmem52b
6.63467e-38	0.688729	0.568	0.136	1.85757e-33	CD-IC	Crim1
1.617e-37	0.596041	0.514	0.109	4.52727e-33	CD-IC	Gbas
3.42879e-37	0.797589	0.766	0.265	9.59994e-33	CD-IC	Rpn1
3.5238e-37	0.523177	0.369	0.062	9.86594e-33	CD-IC	Ermp1
4.51951e-37	0.462835	0.306	0.043	1.26537e-32	CD-IC	Tspan1
9.72836e-37	0.443914	0.342	0.054	2.72374e-32	CD-IC	Leprot
1.01234e-36	1.02622	0.631	0.183	2.83435e-32	CD-IC	Cox7a1
2.01461e-36	0.535149	0.45	0.089	5.64051e-32	CD-IC	Pmepa1
3.23882e-36	0.431319	0.315	0.046	9.06805e-32	CD-IC	Csrp1
5.83475e-36	0.898573	0.595	0.168	1.63361e-31	CD-IC	Clcn5
1.2302e-35	0.636475	0.468	0.098	3.44431e-31	CD-IC	Tanc1
1.49488e-35	0.387977	0.261	0.034	4.18537e-31	CD-IC	Gsn
6.56402e-35	0.452072	0.315	0.049	1.83779e-30	CD-IC	Rap1gap
1.7761e-34	0.631292	0.577	0.149	4.97272e-30	CD-IC	Elovl7
2.76714e-34	0.481894	0.541	0.126	7.74744e-30	CD-IC	Clu
3.45508e-34	0.608049	0.459	0.099	9.67353e-30	CD-IC	Pou3f3
9.22466e-34	0.399249	0.279	0.04	2.58272e-29	CD-IC	Pcolce
1.51655e-33	0.452978	0.333	0.054	4.24602e-29	CD-IC	Tmem72
1.9635e-33	0.340974	0.252	0.033	5.4974e-29	CD-IC	Tesk2
2.49553e-33	0.46751	0.333	0.057	6.98697e-29	CD-IC	Ets2
2.61383e-33	0.852903	0.82	0.343	7.31821e-29	CD-IC	S100a11
3.59504e-33	0.695267	0.55	0.145	1.00654e-28	CD-IC	Trp53inp2
4.85579e-33	0.755616	0.874	0.369	1.35952e-28	CD-IC	Spint2
6.21669e-33	0.638566	0.441	0.096	1.74055e-28	CD-IC	Iqgap1
6.84337e-33	0.819895	0.793	0.294	1.91601e-28	CD-IC	Gclc
1.19627e-32	0.916437	0.964	0.669	3.34932e-28	CD-IC	Actg1
1.39571e-32	0.69597	0.658	0.202	3.9077e-28	CD-IC	Ddx6
2.7101e-32	0.777653	0.541	0.144	7.58774e-28	CD-IC	Irf2bpl
2.96288e-32	1.4555	0.369	0.074	8.29546e-28	CD-IC	Hsd11b2
3.36257e-32	0.694757	0.604	0.167	9.41453e-28	CD-IC	Fam13a
3.64623e-32	0.462249	0.369	0.069	1.02087e-27	CD-IC	Ttc3
6.30172e-32	0.510169	0.423	0.088	1.76436e-27	CD-IC	Lgals3
1.27608e-31	0.397657	0.315	0.053	3.57277e-27	CD-IC	Cdc42bpb
1.78576e-31	0.723717	0.982	0.764	4.99976e-27	CD-IC	Atp5a1
2.4259e-31	0.425824	0.297	0.047	6.79203e-27	CD-IC	Tesc
3.37305e-31	0.736205	0.595	0.176	9.44386e-27	CD-IC	Atp6v1h
3.5193e-31	0.443814	0.432	0.091	9.85335e-27	CD-IC	Litaf
7.01856e-31	0.492232	0.369	0.071	1.96506e-26	CD-IC	Pls3
1.82013e-30	1.19414	0.541	0.151	5.09599e-26	CD-IC	Egr1
2.29591e-30	0.652566	0.568	0.158	6.42808e-26	CD-IC	Paqr5
2.81753e-30	0.74786	0.577	0.171	7.88853e-26	CD-IC	Wwc1
4.04018e-30	0.551532	0.378	0.077	1.13117e-25	CD-IC	Cxadr
9.22994e-30	0.504897	0.252	0.038	2.5842e-25	CD-IC	Stc1
1.11114e-29	0.687126	1	0.812	3.11097e-25	CD-IC	Atp1b1
1.26336e-29	0.486935	0.378	0.077	3.53716e-25	CD-IC	Nedd4l
1.28402e-29	0.517306	0.45	0.104	3.59499e-25	CD-IC	Tuba1b
1.70703e-29	0.965331	0.315	0.058	4.77934e-25	CD-IC	Apela
3.75933e-29	0.418002	0.27	0.043	1.05254e-24	CD-IC	Elf3
3.859e-29	0.4479	0.279	0.046	1.08044e-24	CD-IC	Frk
5.86202e-29	0.812943	0.739	0.286	1.64125e-24	CD-IC	Arf6
7.95864e-29	0.635541	0.514	0.14	2.22826e-24	CD-IC	Hnrnpa0
8.48299e-29	0.858601	0.928	0.552	2.37507e-24	CD-IC	Atp6v0b
8.70964e-29	0.78844	0.847	0.394	2.43853e-24	CD-IC	Cdh16
1.09434e-28	0.747898	0.342	0.068	3.06392e-24	CD-IC	Tacstd2
1.47771e-28	0.548784	0.523	0.138	4.1373e-24	CD-IC	Dst
1.4996e-28	0.782193	0.946	0.686	4.19857e-24	CD-IC	Atp6v1f
1.60612e-28	0.528451	0.414	0.094	4.4968e-24	CD-IC	Dag1
1.63858e-28	0.662872	0.658	0.215	4.58769e-24	CD-IC	Sh3bgrl3
1.85888e-28	0.41631	0.252	0.039	5.20449e-24	CD-IC	Sipa1l3
2.89331e-28	0.516772	0.315	0.058	8.10069e-24	CD-IC	Cdkl1
2.8975e-28	0.876888	0.883	0.499	8.11243e-24	CD-IC	Atp6v1e1
4.7956e-28	0.671274	0.595	0.185	1.34267e-23	CD-IC	F11r
6.37793e-28	0.538683	0.351	0.073	1.78569e-23	CD-IC	Ssbp3
1.07375e-27	0.463374	0.333	0.066	3.00627e-23	CD-IC	Rpap3
4.24876e-27	0.571984	0.369	0.081	1.18957e-22	CD-IC	Prps2
4.70052e-27	0.655944	0.505	0.144	1.31605e-22	CD-IC	Cd2ap
6.35734e-27	0.375727	0.27	0.045	1.77993e-22	CD-IC	Enpp4
6.57589e-27	0.315275	0.279	0.047	1.84112e-22	CD-IC	Ptgfr
7.40057e-27	0.368449	0.279	0.049	2.07201e-22	CD-IC	Reps1
1.48542e-26	0.489461	0.342	0.07	4.15887e-22	CD-IC	Acsl4
1.63204e-26	0.690758	0.739	0.3	4.56939e-22	CD-IC	Rtn3
1.70067e-26	1.21704	0.865	0.468	4.76153e-22	CD-IC	Spp1
1.82198e-26	0.52812	0.495	0.128	5.10119e-22	CD-IC	Wfdc2
4.70563e-26	0.447554	0.36	0.079	1.31748e-21	CD-IC	Ppp2cb
5.03935e-26	0.339189	0.261	0.044	1.41092e-21	CD-IC	Akr1c19
6.10135e-26	1.29522	0.414	0.11	1.70826e-21	CD-IC	Aqp2
6.26483e-26	0.572259	0.541	0.158	1.75403e-21	CD-IC	Nfe2l2
7.24085e-26	0.418272	0.351	0.074	2.02729e-21	CD-IC	Tbx2
9.68428e-26	0.398154	0.297	0.056	2.7114e-21	CD-IC	Hmgn3
1.06639e-25	0.732881	0.622	0.224	2.98569e-21	CD-IC	Ctnna1
1.14584e-25	0.408041	0.324	0.065	3.20811e-21	CD-IC	Cacfd1
1.18774e-25	0.521813	1	1	3.32543e-21	CD-IC	mt-Co1
1.85326e-25	0.457415	0.333	0.068	5.18876e-21	CD-IC	Cd82
2.12531e-25	0.678416	0.73	0.283	5.95045e-21	CD-IC	Gls
3.57715e-25	0.541824	0.405	0.099	1.00153e-20	CD-IC	Adgrg1
7.72224e-25	0.599477	0.532	0.157	2.16207e-20	CD-IC	Acss1
9.23547e-25	0.57504	0.523	0.158	2.58575e-20	CD-IC	Cab39
1.09853e-24	0.384071	0.27	0.049	3.07566e-20	CD-IC	Diaph1
[truncated: 4,509 more rows]

## Sheet: 4hr_markers
p-value	avg_logFC	pct.1	pct.2	p_val_adj	cluster	gene
0	1.77479	0.799	0.238	0	S1	Hmox1
0	1.66992	0.926	0.332	0	S1	Gatm
0	1.41134	0.653	0.129	0	S1	Spp2
0	1.1156	1	0.99	0	S1	Gpx3
0	1.06361	0.47	0.094	0	S1	Slc5a2
0	1.02786	0.849	0.462	0	S1	Fgg
0	0.955587	0.842	0.504	0	S1	Lgmn
0	0.66869	0.999	0.969	0	S1	Ftl1
2.10413e-303	1.05252	0.6	0.21	5.89115e-299	S1	Gsta2
8.46822e-276	0.720006	0.935	0.662	2.37093e-271	S1	Tmem27
7.1366e-259	0.346093	0.99	0.865	1.99811e-254	S1	Spp1
1.49713e-249	0.725639	0.835	0.523	4.19167e-245	S1	Ifit2
1.59534e-242	0.79835	0.376	0.08	4.46664e-238	S1	Slc5a12
5.10202e-235	0.928784	0.473	0.156	1.42846e-230	S1	Slc6a19
2.44431e-234	0.74273	0.86	0.653	6.84358e-230	S1	Mif
3.9974e-223	0.519718	0.997	0.827	1.11919e-218	S1	Spink1
3.14737e-220	0.947177	0.553	0.236	8.812e-216	S1	Steap2
1.06667e-217	0.599327	0.888	0.675	2.98646e-213	S1	Irgm1
8.08457e-213	0.723205	0.8	0.493	2.26352e-208	S1	Slc4a4
2.46537e-202	0.684311	0.866	0.569	6.90255e-198	S1	Ass1
8.59325e-199	0.65896	0.905	0.745	2.40594e-194	S1	Rsad2
1.58042e-198	0.786412	0.596	0.297	4.42485e-194	S1	Idh1
1.56709e-183	0.573351	0.928	0.783	4.38754e-179	S1	Ifit1
5.95006e-181	0.675614	0.797	0.502	1.6659e-176	S1	Slc13a1
3.63474e-180	0.708518	0.295	0.066	1.01766e-175	S1	Slc7a7
1.75176e-179	0.827679	0.318	0.078	4.90459e-175	S1	Fgb
8.62377e-178	0.657103	0.74	0.471	2.41448e-173	S1	Dab2
2.1404e-175	0.637308	0.841	0.596	5.9927e-171	S1	Gm10116
1.83002e-170	0.652895	0.286	0.064	5.12368e-166	S1	Gldc
1.70726e-169	0.525969	0.939	0.781	4.77998e-165	S1	Akr1a1
2.08327e-164	0.537301	0.814	0.589	5.83273e-160	S1	Pdzk1ip1
1.52986e-160	0.691743	0.529	0.252	4.28331e-156	S1	Car2
2.48089e-159	0.717399	0.478	0.214	6.946e-155	S1	Nox4
1.4084e-158	0.504651	0.948	0.702	3.94323e-154	S1	Aldob
1.04044e-154	0.684793	0.363	0.115	2.91301e-150	S1	Fabp3
1.57537e-140	0.543427	0.519	0.247	4.41072e-136	S1	Id3
2.01871e-135	0.523615	0.822	0.668	5.65198e-131	S1	Atp6v1g1
3.17828e-131	0.480843	0.861	0.6	8.89856e-127	S1	Slc34a1
8.89851e-131	0.600354	0.266	0.073	2.49141e-126	S1	Cpn1
1.27369e-129	0.660514	0.459	0.219	3.56607e-125	S1	1700016C15Rik
5.35741e-128	0.529097	0.744	0.483	1.49997e-123	S1	Fga
3.21125e-126	0.579719	0.639	0.394	8.99085e-122	S1	Cela1
4.49592e-126	0.572112	0.307	0.097	1.25877e-121	S1	Apoe
2.13096e-115	0.454729	0.835	0.591	5.96626e-111	S1	Miox
5.12062e-112	0.51826	0.662	0.424	1.43367e-107	S1	Pah
1.8459e-111	0.398774	0.9	0.769	5.16815e-107	S1	Cd63
1.37864e-103	0.426871	0.868	0.764	3.85993e-99	S1	Atox1
4.66822e-100	0.42127	0.69	0.486	1.30701e-95	S1	Cmpk2
4.33699e-92	0.28708	0.995	0.885	1.21427e-87	S1	Gpx1
6.3806e-92	0.57836	0.509	0.315	1.78644e-87	S1	Dcxr
1.76591e-87	0.488801	0.642	0.446	4.94419e-83	S1	Igfbp4
1.87844e-87	0.669071	0.447	0.253	5.25927e-83	S1	Chka
6.48023e-87	0.524107	0.296	0.126	1.81433e-82	S1	Mpp1
7.15088e-87	0.359293	0.866	0.695	2.0021e-82	S1	Errfi1
3.12091e-86	0.523653	0.646	0.461	8.73792e-82	S1	Klf6
6.58556e-86	0.310444	0.654	0.414	1.84383e-81	S1	Iigp1
7.74316e-86	0.582242	0.507	0.323	2.16793e-81	S1	Slc25a4
1.74823e-85	0.539862	0.316	0.14	4.89471e-81	S1	Asl
4.7277e-83	0.355127	0.893	0.698	1.32366e-78	S1	Ndrg1
3.00687e-78	0.492565	0.601	0.434	8.41862e-74	S1	Tacc2
2.51069e-76	0.434072	0.66	0.471	7.02944e-72	S1	Fbp1
2.9136e-73	0.525027	0.412	0.24	8.15749e-69	S1	Med21
2.98528e-72	0.517598	0.39	0.217	8.3582e-68	S1	Plk3
3.68728e-72	0.480729	0.465	0.283	1.03237e-67	S1	Enpp2
7.42003e-72	0.463209	0.547	0.373	2.07746e-67	S1	Fam134b
6.70413e-69	0.392251	0.319	0.152	1.87702e-64	S1	Tifa
8.07712e-68	0.284877	0.927	0.852	2.26143e-63	S1	2010107E04Rik
2.63911e-67	0.348026	0.828	0.688	7.38898e-63	S1	Park7
4.36726e-67	0.510627	0.436	0.265	1.22275e-62	S1	Maf
3.83472e-65	0.469647	0.502	0.333	1.07365e-60	S1	Fut9
8.86546e-65	0.45825	0.574	0.42	2.48215e-60	S1	Pcbd1
2.0564e-63	0.53476	0.292	0.144	5.75751e-59	S1	F3
6.34091e-62	0.476893	0.469	0.311	1.77533e-57	S1	Atp6v1b2
8.29778e-62	0.479907	0.289	0.143	2.32321e-57	S1	Acaa2
4.38668e-60	0.25798	0.856	0.636	1.22818e-55	S1	Akr1c21
1.44606e-58	0.444446	0.557	0.414	4.04867e-54	S1	Herpud1
1.56993e-58	0.3897	0.621	0.462	4.39549e-54	S1	Glyat
4.15459e-58	0.601571	0.701	0.633	1.1632e-53	S1	Neat1
2.63195e-56	0.385225	0.737	0.642	7.36894e-52	S1	Lamp2
1.30563e-55	0.430627	0.273	0.138	3.6555e-51	S1	Slc6a8
4.8657e-55	0.362592	0.488	0.329	1.3623e-50	S1	Oasl1
5.3835e-53	0.255362	0.939	0.902	1.50727e-48	S1	Tpt1
1.57084e-52	0.443917	0.321	0.179	4.39804e-48	S1	Gm5424
2.99098e-52	0.261081	0.915	0.84	8.37415e-48	S1	Atp5g1
3.23555e-52	0.366795	0.727	0.624	9.05889e-48	S1	Zfp36l1
1.67967e-51	0.385484	0.279	0.145	4.70274e-47	S1	Clic5
1.10273e-50	0.469643	0.643	0.53	3.08742e-46	S1	Rsrp1
1.16903e-50	0.423663	0.459	0.318	3.27304e-46	S1	Qdpr
1.33465e-50	0.387346	0.511	0.366	3.73674e-46	S1	Pdzk1
9.50291e-50	0.417848	0.306	0.168	2.66062e-45	S1	Gbp6.1
1.05547e-49	0.398942	0.582	0.439	2.9551e-45	S1	Nme2
7.27415e-48	0.395777	0.474	0.338	2.03662e-43	S1	Nus1
3.59532e-47	0.416038	0.323	0.191	1.00662e-42	S1	Cryl1
5.16976e-46	0.278398	0.841	0.744	1.44743e-41	S1	Hint1
6.64438e-46	0.418708	0.343	0.211	1.86029e-41	S1	Trps1
1.46041e-44	0.391874	0.308	0.182	4.08887e-40	S1	Lipa
1.83886e-44	0.28263	0.734	0.617	5.14844e-40	S1	Hint2
4.89465e-42	0.383661	0.269	0.15	1.3704e-37	S1	Nabp1
2.54881e-41	0.34047	0.628	0.504	7.13615e-37	S1	Tcn2
3.71745e-41	0.30053	0.714	0.619	1.04081e-36	S1	Ndufc2
1.83631e-38	0.366754	0.318	0.196	5.14129e-34	S1	Slc3a2
5.27662e-36	0.299174	0.583	0.454	1.47735e-31	S1	Sord
5.34273e-36	0.359773	0.282	0.172	1.49586e-31	S1	Tceal8
7.96593e-36	0.292146	0.423	0.285	2.2303e-31	S1	Dnase1
8.52123e-36	0.367144	0.38	0.262	2.38577e-31	S1	Manf
8.78863e-36	0.332141	0.503	0.383	2.46064e-31	S1	Gstm5
9.35581e-36	0.345782	0.359	0.243	2.61944e-31	S1	Ubald2
2.13911e-35	0.320962	0.708	0.629	5.98907e-31	S1	Mdh1
3.29348e-35	0.301551	0.374	0.247	9.22108e-31	S1	Wbp5
3.98596e-35	0.350485	0.449	0.336	1.11599e-30	S1	Ctsl
4.174e-35	0.259025	0.711	0.612	1.16864e-30	S1	Tmem256
1.10508e-34	0.277631	0.747	0.68	3.094e-30	S1	Gapdh
7.80114e-34	0.323121	0.278	0.167	2.18416e-29	S1	Snx10
8.15028e-34	0.345718	0.411	0.298	2.28191e-29	S1	2020-03-02
1.72283e-33	0.357904	0.433	0.331	4.82358e-29	S1	Bpnt1
2.84271e-33	0.299965	0.492	0.379	7.95902e-29	S1	Comt
9.98838e-33	0.267412	0.254	0.147	2.79655e-28	S1	Xdh
2.56948e-31	0.315635	0.365	0.255	7.19404e-27	S1	Tagln2
5.35556e-31	0.282959	0.556	0.442	1.49945e-26	S1	Parp14
4.74257e-30	0.319193	0.414	0.31	1.32783e-25	S1	G3bp2
1.89308e-29	0.340176	0.261	0.163	5.30024e-25	S1	Cubn
1.97734e-28	0.256742	0.598	0.501	5.53617e-24	S1	Igtp
5.75549e-28	0.32076	0.392	0.284	1.61142e-23	S1	Ethe1
7.06636e-28	0.330827	0.349	0.251	1.97844e-23	S1	Acaa1a
1.38228e-27	0.296505	0.378	0.272	3.87009e-23	S1	Gstt2
4.3444e-27	0.278114	0.254	0.155	1.21634e-22	S1	Ccnd1
5.24571e-27	0.25035	0.533	0.426	1.4687e-22	S1	Jun
7.9278e-27	0.313818	0.34	0.242	2.21963e-22	S1	Sptlc2
2.33131e-26	0.317597	0.426	0.335	6.52719e-22	S1	Sqstm1
2.9851e-26	0.30308	0.276	0.184	8.35769e-22	S1	Aldh7a1
5.04525e-26	0.288571	0.386	0.286	1.41257e-21	S1	Fmo1
1.91159e-25	0.267525	0.501	0.402	5.35207e-21	S1	Xbp1
2.9207e-25	0.261655	0.526	0.439	8.17738e-21	S1	Ctsb
4.3632e-25	0.298138	0.251	0.161	1.22161e-20	S1	Tmem106a
1.01348e-23	0.280022	0.476	0.383	2.83755e-19	S1	Tmem140
2.88935e-23	0.283834	0.277	0.189	8.08961e-19	S1	Gas6
3.461e-23	0.294061	0.325	0.235	9.6901e-19	S1	Ascc1
2.98166e-22	0.491466	0.961	0.978	8.34806e-18	S1	Malat1
1.90893e-21	0.288731	0.451	0.373	5.34464e-17	S1	Hagh
3.45658e-21	0.276699	0.467	0.381	9.67774e-17	S1	Rrbp1
4.00323e-20	0.270753	0.255	0.175	1.12082e-15	S1	Anp32a
1.36727e-19	0.351031	0.359	0.285	3.82807e-15	S1	Nktr
2.11283e-19	0.296414	0.345	0.269	5.9155e-15	S1	Gna13
6.60674e-19	0.260916	0.313	0.237	1.84975e-14	S1	Spag9
2.01204e-18	0.272415	0.337	0.258	5.63332e-14	S1	Nceh1
3.03969e-18	0.282668	0.309	0.237	8.51051e-14	S1	Abhd17c
4.31988e-18	0.321402	0.297	0.223	1.20948e-13	S1	Gm42418
7.7973e-18	0.27266	0.283	0.209	2.18309e-13	S1	Rab11fip3
1.16457e-17	0.280664	0.273	0.201	3.26055e-13	S1	Cep85
2.8435e-16	0.281258	0.3	0.23	7.96122e-12	S1	Frmd4b
7.50068e-15	0.250538	0.34	0.275	2.10004e-10	S1	Mocs2
2.41448e-12	0.280723	0.358	0.306	6.76007e-08	S1	Uap1
2.61122e-09	0.267575	0.282	0.237	7.31089e-05	S1	Ank3
1.66254e-177	0.788303	0.931	0.619	4.65477e-173	S2	Miox
2.42999e-161	0.659902	0.981	0.755	6.80348e-157	S2	Guca2b
1.28328e-151	0.741904	0.925	0.612	3.59293e-147	S2	Ass1
1.05988e-138	0.577626	0.993	0.888	2.96745e-134	S2	Dbi
3.6514e-134	0.639237	0.945	0.661	1.02232e-129	S2	Akr1c21
1.47637e-124	0.559283	0.976	0.855	4.13354e-120	S2	Kap
4.11391e-124	0.616957	0.968	0.791	1.15181e-119	S2	Cyb5a
1.68301e-119	0.440247	1	0.974	4.7121e-115	S2	Ftl1
1.77992e-114	0.569162	0.847	0.502	4.98343e-110	S2	Cyp4b1
5.37858e-110	0.460884	0.998	0.904	1.50589e-105	S2	Gpx1
1.28972e-108	0.625605	0.828	0.495	3.61096e-104	S2	Acy3
5.44908e-103	0.515784	0.967	0.742	1.52563e-98	S2	Aldob
1.0522e-98	0.517967	0.921	0.655	2.94595e-94	S2	Ttc36
3.35252e-95	0.454727	0.981	0.896	9.38638e-91	S2	Cycs
1.09672e-94	0.531317	0.934	0.73	3.07059e-90	S2	Hrsp12
1.64002e-94	0.471043	0.814	0.455	4.59172e-90	S2	Cyp2e1
1.89945e-90	0.337288	1	0.992	5.31809e-86	S2	Gpx3
9.12448e-89	0.58646	0.713	0.426	2.55467e-84	S2	Cela1
1.15835e-83	0.458919	0.946	0.807	3.24314e-79	S2	Akr1a1
9.02199e-83	0.377287	0.999	0.961	2.52598e-78	S2	Fxyd2
6.58621e-78	0.539993	0.764	0.506	1.84401e-73	S2	Khk
2.3471e-76	0.422997	0.928	0.722	6.57141e-72	S2	Tmem252
8.876e-76	0.458753	0.937	0.791	2.4851e-71	S2	Atpif1
2.56978e-74	0.368185	0.996	0.857	7.19486e-70	S2	Spink1
4.45763e-74	0.466735	0.862	0.636	1.24805e-69	S2	Gm10116
4.89851e-72	0.528594	0.694	0.447	1.37148e-67	S2	Nme2
4.82684e-71	0.450587	0.874	0.706	1.35142e-66	S2	Park7
4.40007e-68	0.455054	0.915	0.82	1.23193e-63	S2	Ybx1
4.94608e-68	0.495124	0.786	0.562	1.3848e-63	S2	Hist1h2bc
2.30852e-67	0.529535	0.625	0.355	6.46339e-63	S2	Inmt
2.83371e-66	0.502702	0.716	0.457	7.93383e-62	S2	Ugt2b38
2.81248e-65	0.44041	0.852	0.663	7.87437e-61	S2	Cisd1
2.94552e-65	0.415304	0.852	0.617	8.24685e-61	S2	Pck1
2.63494e-62	0.56991	0.543	0.311	7.3773e-58	S2	Pecr
5.16404e-61	0.483556	0.746	0.51	1.44583e-56	S2	Calml4
5.02513e-59	0.516581	0.61	0.388	1.40694e-54	S2	Gstm5
3.75833e-57	0.538964	0.399	0.192	1.05226e-52	S2	Gm5424
7.35862e-56	0.43198	0.805	0.627	2.06027e-51	S2	Hint2
1.33454e-54	0.469311	0.719	0.495	3.73645e-50	S2	Fbp1
2.46692e-54	0.522896	0.503	0.299	6.90688e-50	S2	Mkrn1
2.30073e-53	0.376207	0.898	0.752	6.44159e-49	S2	Hint1
4.01919e-52	0.367905	0.859	0.692	1.12529e-47	S2	Hspe1
4.24307e-51	0.436011	0.69	0.48	1.18797e-46	S2	Glyat
5.28385e-51	0.398188	0.785	0.593	1.47937e-46	S2	Msrb1
1.22523e-50	0.486911	0.747	0.544	3.43039e-46	S2	Fgg
3.97727e-50	0.354655	0.895	0.767	1.11356e-45	S2	Rpl10
1.98422e-48	0.307884	0.963	0.861	5.55542e-44	S2	Gpx4
4.97104e-47	0.436498	0.645	0.425	1.39179e-42	S2	RP24-64C6.3
5.15219e-46	0.323156	0.906	0.792	1.44251e-41	S2	Ndufa6
4.56973e-44	0.45835	0.504	0.306	1.27943e-39	S2	Polr3e
1.26923e-43	0.320745	0.98	0.946	3.55359e-39	S2	Ubb
1.34243e-43	0.342417	0.871	0.706	3.75853e-39	S2	Scp2
3.35629e-43	0.292	0.942	0.776	9.39695e-39	S2	Sepp1
5.69547e-42	0.339695	0.86	0.693	1.59462e-37	S2	Cyba
3.12135e-41	0.409655	0.7	0.521	8.73917e-37	S2	Ddt
1.07144e-40	0.433845	0.752	0.56	2.99982e-36	S2	Slc13a1
8.58901e-40	0.363237	0.673	0.467	2.40475e-35	S2	Keg1
9.81106e-40	0.495383	0.451	0.276	2.7469e-35	S2	Tmem37
2.82374e-39	0.401063	0.679	0.504	7.90591e-35	S2	Gm10053
6.21489e-38	0.355319	0.954	0.893	1.74005e-33	S2	Prdx1
1.37035e-37	0.313583	0.844	0.666	3.83672e-33	S2	Sult1d1
2.19656e-37	0.387167	0.644	0.472	6.14992e-33	S2	Dnajc19
1.55676e-36	0.313931	0.876	0.75	4.35861e-32	S2	Ndufb4
1.81612e-36	0.343644	0.3	0.143	5.08478e-32	S2	Slc5a12
2.55328e-36	0.394274	0.559	0.374	7.14868e-32	S2	Bdh2
3.98351e-36	0.393167	0.5	0.319	1.1153e-31	S2	RP23-306P12.2
5.5093e-36	0.477462	0.429	0.259	1.54249e-31	S2	Gstp1
7.7342e-36	0.307462	0.905	0.79	2.16542e-31	S2	Cd63
8.75036e-36	0.371869	0.266	0.125	2.44992e-31	S2	Slc22a8
1.20482e-35	0.453858	0.477	0.302	3.37326e-31	S2	Adh1
1.29987e-35	0.832281	0.367	0.211	3.63939e-31	S2	Ttr
2.64702e-35	0.400622	0.567	0.392	7.41113e-31	S2	0610011F06Rik
3.03235e-35	0.269423	0.937	0.834	8.48998e-31	S2	Chchd10
5.56199e-35	0.340421	0.642	0.454	1.55725e-30	S2	Cda
2.84988e-34	0.393717	0.724	0.574	7.97911e-30	S2	Etfb
4.12624e-34	0.256572	0.898	0.715	1.15526e-29	S2	Tmem27
6.03316e-34	0.391149	0.372	0.214	1.68916e-29	S2	Hao2
2.1452e-33	0.419925	0.521	0.357	6.00614e-29	S2	Smim1
2.51353e-33	0.296761	0.904	0.788	7.03738e-29	S2	Mpc1
2.5992e-33	0.398204	0.476	0.296	7.27723e-29	S2	Gsta2
1.868e-32	0.466792	0.291	0.151	5.23003e-28	S2	Apom
4.65077e-32	0.285615	0.853	0.646	1.30212e-27	S2	Slc34a1
5.4685e-32	0.408789	0.457	0.293	1.53107e-27	S2	Ethe1
5.66046e-32	0.311741	0.697	0.503	1.58482e-27	S2	Cyp2j5
8.28374e-32	0.339314	0.755	0.622	2.31928e-27	S2	Tmem256
1.83037e-31	0.285543	0.815	0.696	5.12467e-27	S2	Atp6v1g1
5.9027e-31	0.313729	0.801	0.674	1.65264e-26	S2	Ndufv3
1.18501e-30	0.393091	0.453	0.289	3.31779e-26	S2	Cml1
3.40752e-30	0.270261	0.698	0.486	9.54036e-26	S2	Cndp2
8.10775e-30	0.251756	0.888	0.774	2.27001e-25	S2	Rps27l
2.55061e-29	0.396678	0.389	0.241	7.14121e-25	S2	Dhrs4
7.54258e-29	0.343079	0.628	0.47	2.11177e-24	S2	Sord
1.1823e-28	0.328599	0.687	0.549	3.31021e-24	S2	Glul
2.79503e-28	0.359852	0.519	0.359	7.82551e-24	S2	Ech1
3.90596e-28	0.334799	0.469	0.302	1.09359e-23	S2	Dnase1
5.00177e-27	0.291606	0.695	0.535	1.4004e-22	S2	Fga
6.8864e-27	0.331261	0.304	0.17	1.92805e-22	S2	Susd3
7.61882e-27	0.353572	0.57	0.431	2.13312e-22	S2	Txndc17
7.94133e-27	0.28409	0.857	0.741	2.22341e-22	S2	Cystm1
1.10116e-26	0.325023	0.348	0.206	3.08303e-22	S2	G0s2
1.14268e-26	0.282922	0.643	0.467	3.19927e-22	S2	4931406C07Rik
1.16016e-26	0.281845	0.779	0.648	3.24823e-22	S2	Mrps21
5.97689e-26	0.264252	0.866	0.77	1.67341e-21	S2	Txn1
1.88991e-25	0.332224	0.545	0.393	5.29138e-21	S2	Akr7a5
2.04193e-25	0.268546	0.529	0.359	5.717e-21	S2	Idh1
3.27995e-25	0.356075	0.289	0.165	9.1832e-21	S2	Car4
3.81891e-25	0.304742	0.673	0.54	1.06922e-20	S2	Nme1
4.21021e-25	0.331634	0.376	0.235	1.17878e-20	S2	Ces1f
4.63902e-25	0.364277	0.399	0.26	1.29883e-20	S2	BC026585
6.67683e-25	0.281773	0.26	0.138	1.86938e-20	S2	Ppp1r16b
1.32767e-24	0.295542	0.481	0.319	3.7172e-20	S2	Slc17a3
5.10415e-24	0.278324	0.798	0.684	1.42906e-19	S2	Gapdh
7.83411e-24	0.344142	0.347	0.214	2.19339e-19	S2	Cmbl
1.32142e-23	0.28749	0.628	0.47	3.69971e-19	S2	Pah
1.51717e-23	0.34143	0.383	0.249	4.24776e-19	S2	Tcea3
2.49428e-23	0.26034	0.855	0.765	6.98349e-19	S2	Rps2
2.98527e-23	0.280175	0.744	0.631	8.35817e-19	S2	Ndufc2
3.01087e-23	0.346022	0.285	0.165	8.42984e-19	S2	Slc51b
5.2797e-23	0.280278	0.708	0.593	1.47821e-18	S2	2410015M20Rik
1.08403e-22	0.324981	0.321	0.198	3.03506e-18	S2	Aspdh
2.9483e-22	0.358799	0.371	0.244	8.25465e-18	S2	Ascc1
4.74326e-22	0.297865	0.458	0.319	1.32802e-17	S2	Cldn10
2.16029e-21	0.259821	0.721	0.598	6.04838e-17	S2	Ndufb10
2.54207e-21	0.294621	0.524	0.382	7.11728e-17	S2	Ccdc107
4.62156e-21	0.334253	0.383	0.26	1.29394e-16	S2	Pter
4.99989e-21	0.285837	0.726	0.598	1.39987e-16	S2	Ost4
6.0465e-21	0.287066	0.442	0.306	1.6929e-16	S2	Gas2
9.76836e-21	0.314831	0.395	0.269	2.73494e-16	S2	Fah
1.03298e-20	0.29712	0.282	0.167	2.89215e-16	S2	Timd2
1.22376e-20	0.269753	0.694	0.589	3.42627e-16	S2	Zfp706
1.61144e-20	0.335805	0.496	0.376	4.51172e-16	S2	Acot13
1.65673e-20	0.327511	0.438	0.311	4.6385e-16	S2	Msra
1.89131e-20	0.328191	0.273	0.162	5.29529e-16	S2	Fitm1
5.2074e-20	0.284747	0.45	0.317	1.45797e-15	S2	Enpp2
5.37044e-20	0.336469	0.376	0.252	1.50362e-15	S2	Alas1
5.96927e-20	0.267886	0.452	0.311	1.67128e-15	S2	Car2
1.55757e-19	0.283039	0.466	0.341	4.36087e-15	S2	Qdpr
1.75798e-19	0.293507	0.592	0.482	4.92199e-15	S2	Timm8b
4.81137e-19	0.306706	0.5	0.376	1.34709e-14	S2	Mrps36
8.56335e-19	0.327269	0.455	0.332	2.39757e-14	S2	Bphl
3.13952e-18	0.273726	0.574	0.459	8.79003e-14	S2	Grcc10
3.7437e-18	0.261707	0.666	0.561	1.04816e-13	S2	Naca
4.71766e-18	0.27102	0.28	0.173	1.32085e-13	S2	Erich4
4.87225e-18	0.2552	0.527	0.391	1.36413e-13	S2	Dnajc12
7.02212e-18	0.311699	0.325	0.214	1.96605e-13	S2	Hgd
3.70231e-17	0.261817	0.332	0.219	1.03657e-12	S2	Nr1h4
1.03447e-16	0.264778	0.475	0.355	2.89632e-12	S2	Snhg18
1.07924e-16	0.287738	0.42	0.304	3.02167e-12	S2	Iah1
1.41148e-16	0.30635	0.34	0.229	3.95186e-12	S2	Grhpr
1.68136e-16	0.29458	0.334	0.228	4.70748e-12	S2	Spr
1.8948e-16	0.260107	0.47	0.356	5.30506e-12	S2	Map1lc3a
2.01598e-16	0.30485	0.279	0.18	5.64434e-12	S2	Hoga1
2.03251e-16	0.289825	0.563	0.452	5.69062e-12	S2	Sephs2
4.85423e-16	0.29301	0.465	0.36	1.35909e-11	S2	Lamtor4
5.5401e-16	0.26961	0.363	0.256	1.55112e-11	S2	Fahd1
1.14553e-15	0.255703	0.511	0.396	3.20725e-11	S2	Comt
1.16573e-15	0.265987	0.361	0.251	3.26382e-11	S2	2310039H08Rik
1.37353e-15	0.268545	0.628	0.529	3.84561e-11	S2	Hibadh
2.91412e-15	0.292487	0.436	0.329	8.15896e-11	S2	Stra13
3.27008e-15	0.257492	0.567	0.451	9.15557e-11	S2	Esd
4.01134e-15	0.307293	0.386	0.281	1.12309e-10	S2	Selenbp1
6.42165e-15	0.290397	0.253	0.161	1.79793e-10	S2	Aadat
8.42019e-15	0.251824	0.5	0.393	2.35748e-10	S2	Mrpl12
9.49285e-15	0.292143	0.325	0.225	2.65781e-10	S2	Ccs
1.55348e-14	0.2525	0.257	0.164	4.34943e-10	S2	Nit2
2.94849e-14	0.267899	0.465	0.359	8.25518e-10	S2	Pfdn1
3.97188e-14	0.255593	0.525	0.423	1.11205e-09	S2	Swi5
5.83362e-14	0.263584	0.382	0.283	1.6333e-09	S2	Cryz
5.93807e-14	0.254538	0.482	0.382	1.66254e-09	S2	Hagh
6.52499e-14	0.251423	0.37	0.27	1.82687e-09	S2	Smim22
9.67531e-14	0.260491	0.448	0.339	2.70889e-09	S2	Plin2
2.32603e-13	0.293069	0.363	0.267	6.51242e-09	S2	Cisd3
2.93395e-13	0.250481	0.283	0.193	8.21448e-09	S2	Nit1
1.17269e-12	0.2691	0.458	0.366	3.28329e-08	S2	Suclg1
4.62208e-12	0.254069	0.275	0.19	1.29409e-07	S2	Tmem126a
7.54851e-12	0.262935	0.39	0.298	2.11343e-07	S2	Cib1
2.04646e-11	0.255097	0.26	0.179	5.72967e-07	S2	Coa6
3.27886e-11	0.252974	0.41	0.327	9.18016e-07	S2	Mrpl51
0	1.7101	1	0.827	0	S3	Kap
0	1.45914	0.94	0.371	0	S3	Cndp2
0	1.44938	0.947	0.352	0	S3	Cyp2e1
0	1.43148	0.725	0.09	0	S3	Slc7a13
0	1.40668	0.598	0.046	0	S3	Slco1a1
0	1.40247	0.985	0.577	0	S3	Slc27a2
0	1.38333	0.892	0.281	0	S3	Nudt19
0	1.26726	0.698	0.118	0	S3	Cd36
0	1.20925	0.633	0.08	0	S3	Slc5a8
0	1.164	0.769	0.255	0	S3	Atp11a
0	1.16257	0.936	0.417	0	S3	Cyp4b1
0	1.1466	0.798	0.22	0	S3	Slc22a12
0	1.1432	0.925	0.409	0	S3	Acy3
0	1.14276	0.738	0.187	0	S3	Mep1a
0	1.13625	0.605	0.132	0	S3	Slc22a30
0	1.12731	0.55	0.139	0	S3	G6pc
0	1.11857	0.734	0.197	0	S3	Pank1
0	1.11252	0.939	0.55	0	S3	Pck1
0	1.11133	0.763	0.242	0	S3	Lpl
0	1.10724	0.683	0.137	0	S3	Nat8
0	1.09104	0.632	0.119	0	S3	Slc22a6
0	1.08752	0.793	0.256	0	S3	Inmt
0	1.05569	0.548	0.076	0	S3	Tmigd1
0	1.02426	0.897	0.47	0	S3	Acox1
0	1.01694	0.556	0.08	0	S3	Acsm3
0	1.01346	0.983	0.59	0	S3	Ttc36
0	0.940146	0.68	0.251	0	S3	Crot
0	0.932885	0.967	0.708	0	S3	Chpt1
0	0.928584	0.776	0.292	0	S3	Ghr
0	0.927924	0.795	0.341	0	S3	Ugt3a2
0	0.909187	0.676	0.207	0	S3	Adh1
0	0.907905	0.732	0.174	0	S3	Napsa
0	0.858188	0.678	0.227	0	S3	Slc17a3
0	0.847474	0.726	0.263	0	S3	Ggt1
0	0.847227	0.958	0.623	0	S3	Acsm2
0	0.843127	0.506	0.098	0	S3	Agps
0	0.818734	0.989	0.756	0	S3	Cyb5a
0	0.793341	0.568	0.144	0	S3	Mpv17l
0	0.75705	0.981	0.736	0	S3	Sepp1
1.17092e-304	0.798226	0.423	0.073	3.27834e-300	S3	Slc6a18
5.25166e-296	0.808746	0.653	0.223	1.47036e-291	S3	Ldhd
1.37308e-294	0.577895	0.999	0.888	3.84436e-290	S3	Gpx1
1.30791e-291	0.65009	0.992	0.714	3.66187e-287	S3	Guca2b
8.63168e-291	0.755063	0.562	0.151	2.4167e-286	S3	Ces1f
2.26899e-288	0.766958	0.538	0.14	6.35271e-284	S3	Ugt3a1
2.83319e-287	0.807162	0.778	0.366	7.93237e-283	S3	Gk
1.19905e-275	0.900806	0.766	0.384	3.35709e-271	S3	Odc1
5.12653e-264	0.756927	0.664	0.252	1.43533e-259	S3	Aass
1.45106e-260	0.740511	0.501	0.132	4.06267e-256	S3	Amacr
5.56333e-254	0.738886	0.538	0.163	1.55762e-249	S3	Hykk
7.24316e-251	0.664458	0.352	0.059	2.02794e-246	S3	Gm11128
1.06712e-245	0.749033	0.587	0.203	2.98773e-241	S3	Ehhadh
1.11838e-243	0.666771	0.831	0.427	3.13124e-239	S3	Cyp2j5
7.57975e-243	0.677192	0.395	0.081	2.12218e-238	S3	Slc13a3
5.28175e-240	0.69	0.798	0.392	1.47878e-235	S3	Keg1
7.37049e-240	0.672997	0.444	0.11	2.06359e-235	S3	Ak4
1.26422e-237	0.729817	0.577	0.197	3.53956e-233	S3	Tmem205
4.36864e-237	0.699735	0.418	0.097	1.22313e-232	S3	Acaa1b
2.28197e-232	0.6074	0.884	0.529	6.38905e-228	S3	Msrb1
9.2757e-231	0.695552	0.759	0.351	2.59701e-226	S3	RP24-64C6.3
9.66879e-231	0.68186	0.58	0.201	2.70707e-226	S3	Me1
3.5173e-228	0.619299	0.34	0.061	9.84773e-224	S3	D630029K05Rik
6.02829e-228	0.695194	0.51	0.154	1.6878e-223	S3	Slco1a6
6.29547e-226	0.703828	0.767	0.395	1.76261e-221	S3	Cat
1.82568e-224	0.64445	0.971	0.684	5.11153e-220	S3	Hrsp12
2.63941e-221	0.634257	0.378	0.082	7.38982e-217	S3	Eci3
4.86431e-220	0.684999	0.695	0.313	1.36191e-215	S3	Galnt11
6.91162e-220	0.653728	0.633	0.247	1.93512e-215	S3	Tnfrsf21
7.5545e-220	0.573062	0.942	0.655	2.11511e-215	S3	Scp2
1.29444e-217	0.64616	0.273	0.037	3.62418e-213	S3	Ugt2b37
2.45403e-217	0.693498	0.631	0.245	6.87079e-213	S3	RP23-306P12.2
4.57885e-211	0.644536	0.863	0.512	1.28199e-206	S3	Lrp2
5.43842e-210	0.647845	0.321	0.06	1.52265e-205	S3	Cyp4a10
2.62759e-209	0.696508	0.587	0.218	7.35672e-205	S3	Cml1
5.54819e-207	0.681779	0.687	0.316	1.55338e-202	S3	Dnajc12
1.52139e-206	0.645549	0.752	0.385	4.2596e-202	S3	Kcnj15
3.20427e-206	0.668502	0.521	0.177	8.97131e-202	S3	Fam195a
1.55424e-204	0.900451	0.746	0.44	4.35155e-200	S3	Mat2a
8.38541e-204	0.613359	0.714	0.325	2.34775e-199	S3	Slc17a1
1.57813e-202	0.644807	0.531	0.183	4.41845e-198	S3	Slc47a1
6.01159e-200	0.513228	0.943	0.689	1.68313e-195	S3	Ndrg1
9.3653e-200	0.6227	0.441	0.126	2.6221e-195	S3	Gchfr
9.67699e-199	0.655875	0.78	0.394	2.70936e-194	S3	Ugt2b38
1.24197e-198	0.649145	0.381	0.097	3.47727e-194	S3	Hsd17b11
3.23498e-197	0.62992	0.769	0.415	9.0573e-193	S3	Aldh6a1
1.23798e-195	0.527518	0.276	0.045	3.46611e-191	S3	Gm27216
3.57413e-194	0.606322	0.403	0.107	1.00068e-189	S3	Car4
8.54177e-192	0.554047	0.331	0.072	2.39152e-187	S3	Acot12
4.50503e-191	0.273144	1	0.996	1.26132e-186	S3	Fth1
5.08357e-190	0.577795	0.713	0.342	1.4233e-185	S3	Acadm
2.6085e-188	0.605238	0.758	0.385	7.30327e-184	S3	Cda
5.74251e-188	0.462418	0.988	0.836	1.60779e-183	S3	Gpx4
6.5959e-188	0.525966	0.955	0.612	1.84672e-183	S3	Akr1c21
1.53403e-187	0.610485	0.491	0.165	4.29497e-183	S3	BC021785
3.26552e-184	0.491786	0.947	0.736	9.1428e-180	S3	Rps27l
1.00135e-182	0.489938	0.272	0.047	2.80357e-178	S3	Slc22a2
2.26153e-182	0.508449	0.922	0.59	6.33183e-178	S3	Slc34a1
2.319e-180	0.554092	0.361	0.09	6.49274e-176	S3	Cyp2j13
4.98893e-180	0.534628	0.385	0.103	1.3968e-175	S3	Aadat
2.86139e-177	0.715228	0.635	0.29	8.01132e-173	S3	Defb29
1.39496e-176	0.649631	0.661	0.318	3.9056e-172	S3	Smim4
2.02212e-176	0.613927	0.484	0.171	5.66152e-172	S3	Ephx2
1.30643e-175	0.499103	0.269	0.049	3.65774e-171	S3	Fmo5
6.8473e-172	0.503538	0.915	0.613	1.91711e-167	S3	Sult1d1
1.04847e-171	0.474539	0.997	0.87	2.93552e-167	S3	Dbi
1.26507e-170	0.554585	0.367	0.1	3.54196e-166	S3	Cyp4a31
1.32216e-168	0.584021	0.428	0.138	3.7018e-164	S3	Them7
5.89917e-168	0.542371	0.835	0.525	1.65165e-163	S3	Zfp706
1.08244e-164	0.566802	0.809	0.449	3.03061e-160	S3	Khk
5.48334e-160	0.542141	0.398	0.123	1.53523e-155	S3	Serpinf2
6.04806e-160	0.580796	0.372	0.108	1.69334e-155	S3	Cgref1
1.82479e-159	0.573448	0.659	0.314	5.10906e-155	S3	Ccdc107
7.78833e-159	0.508838	0.896	0.624	2.18058e-154	S3	H2afj
2.90167e-157	0.490538	0.296	0.069	8.12408e-153	S3	Csad
4.83563e-153	0.565996	0.569	0.254	1.35388e-148	S3	Hmgcs1
1.65031e-152	0.542991	0.494	0.192	4.62054e-148	S3	Nhp2
7.47939e-152	0.532247	0.422	0.144	2.09408e-147	S3	Tmem189
4.17092e-151	0.4816	0.328	0.088	1.16777e-146	S3	Ugt8a
6.85402e-151	0.465366	0.251	0.05	1.91899e-146	S3	Adtrp
9.35963e-150	0.460247	0.999	0.833	2.62051e-145	S3	Spink1
1.86406e-148	0.412245	0.948	0.682	5.21899e-144	S3	Tmem252
1.59758e-147	0.533873	0.738	0.407	4.4729e-143	S3	4931406C07Rik
5.64078e-146	0.392784	0.34	0.095	1.57931e-141	S3	Aqp1
7.94344e-146	0.542499	0.631	0.309	2.224e-141	S3	Gclm
9.11319e-146	0.533854	0.576	0.258	2.55151e-141	S3	Lypla1
9.7664e-146	0.50277	0.576	0.254	2.7344e-141	S3	Lactb2
4.37788e-144	0.521507	0.522	0.214	1.22572e-139	S3	Cd302
2.27091e-141	0.510746	0.586	0.266	6.35809e-137	S3	Lap3
1.22011e-140	0.525685	0.6	0.287	3.41607e-136	S3	Sod1
9.24993e-140	0.44106	0.253	0.055	2.5898e-135	S3	Hsf2bp
1.26526e-137	0.555974	0.443	0.165	3.54246e-133	S3	Hao2
7.90819e-137	0.531187	0.585	0.269	2.21414e-132	S3	Bphl
1.42721e-136	0.508513	0.741	0.443	3.9959e-132	S3	4833439L19Rik
3.09582e-135	0.476112	0.908	0.648	8.66767e-131	S3	Hspe1
1.1619e-134	0.455067	0.313	0.088	3.25309e-130	S3	Slc22a28
2.31995e-134	0.462624	0.359	0.115	6.49539e-130	S3	Fitm1
3.25095e-133	0.505246	0.548	0.251	9.10201e-129	S3	Abcd3
5.18893e-132	0.486709	0.56	0.251	1.4528e-127	S3	Folr1
1.9392e-130	0.61119	0.754	0.519	5.42938e-126	S3	Zbtb20
2.26554e-130	0.47458	0.288	0.077	6.34305e-126	S3	Trim7
1.37073e-129	0.459581	0.332	0.102	3.83777e-125	S3	Entpd5
2.983e-127	0.347849	0.981	0.7	8.35181e-123	S3	Aldob
4.70749e-127	0.459383	0.365	0.124	1.318e-122	S3	Wwp1
1.35627e-126	0.5077	0.723	0.409	3.79727e-122	S3	Tmem176a
3.73252e-125	0.482839	0.452	0.179	1.04503e-120	S3	Aspa
3.56099e-124	0.536	0.417	0.16	9.97006e-120	S3	G0s2
6.97161e-124	0.449646	0.303	0.089	1.95191e-119	S3	Fhl1
1.23932e-123	0.427791	0.296	0.085	3.46984e-119	S3	Coasy
2.30911e-123	0.472142	0.609	0.3	6.46504e-119	S3	Gcnt1
2.84101e-122	0.464099	0.498	0.214	7.95427e-118	S3	Fah
1.05151e-120	0.459948	0.467	0.197	2.94401e-116	S3	Rnf181
1.24619e-120	0.436755	0.294	0.086	3.48907e-116	S3	Proc
1.94427e-120	0.559726	0.37	0.133	5.44355e-116	S3	Pdk4
9.38769e-120	0.446397	0.486	0.206	2.62837e-115	S3	Pter
1.9236e-119	0.478512	0.369	0.132	5.38569e-115	S3	Papss2
2.22887e-119	0.352653	0.992	0.902	6.24039e-115	S3	Prdx5
2.27402e-119	0.394817	0.946	0.755	6.36681e-115	S3	Mpc1
1.26628e-118	0.434272	0.335	0.11	3.54533e-114	S3	Sod3
2.72188e-116	0.477201	0.464	0.199	7.62071e-112	S3	2310039H08Rik
4.352e-116	0.438178	0.379	0.141	1.21847e-111	S3	Fam213a
4.55627e-116	0.445884	0.725	0.417	1.27567e-111	S3	Dnajc19
5.28758e-116	0.485395	0.477	0.208	1.48042e-111	S3	Kcnk5
6.49675e-116	0.45832	0.821	0.514	1.81896e-111	S3	Hist1h2bc
1.26035e-115	0.443128	0.486	0.212	3.52873e-111	S3	Ddah1
2.49474e-115	0.450091	0.424	0.169	6.98479e-111	S3	Gstz1
3.24207e-115	0.408869	0.733	0.409	9.07714e-111	S3	Sord
3.2938e-115	0.425621	0.366	0.132	9.22197e-111	S3	Mtss1
1.35041e-113	0.438384	0.381	0.143	3.78088e-109	S3	Macrod2
5.35887e-113	0.395122	0.96	0.759	1.50038e-108	S3	Atpif1
9.76854e-113	0.447889	0.538	0.252	2.735e-108	S3	Gas2
3.97544e-112	0.434816	0.354	0.124	1.11304e-107	S3	Slc18a1
6.4993e-112	0.413046	0.78	0.46	1.81967e-107	S3	Calml4
4.48777e-111	0.333479	0.994	0.908	1.25649e-106	S3	Ndufa4
2.0198e-110	0.466576	0.639	0.34	5.65503e-106	S3	0610011F06Rik
1.27841e-109	0.423976	0.352	0.127	3.57928e-105	S3	Pxmp4
1.36473e-109	0.423806	0.878	0.636	3.82098e-105	S3	Arpp19
3.15696e-109	0.433643	0.554	0.273	8.83885e-105	S3	Slc25a39
1.95273e-108	0.445665	0.551	0.274	5.46724e-104	S3	Stra13
4.24849e-108	0.405878	0.839	0.564	1.18949e-103	S3	Vamp8
5.48495e-107	0.415592	0.394	0.156	1.53568e-102	S3	Abhd14b
6.58733e-107	0.408549	0.332	0.115	1.84432e-102	S3	Abcc2
7.4294e-107	0.393025	0.293	0.092	2.08008e-102	S3	Slc3a1
9.23867e-107	0.400238	0.344	0.123	2.58664e-102	S3	Tmem229a
4.43081e-106	0.389528	0.881	0.623	1.24054e-101	S3	Cisd1
1.12579e-105	0.369064	0.919	0.695	3.15198e-101	S3	Mpc2
3.78196e-105	0.396366	0.297	0.097	1.05887e-100	S3	Cth
7.51407e-105	0.405213	0.816	0.548	2.10379e-100	S3	Ost4
2.75109e-104	0.411045	0.381	0.149	7.7025e-100	S3	Col4a3
3.22153e-104	0.445527	0.744	0.474	9.01964e-100	S3	Hibadh
8.91189e-104	0.466751	0.449	0.197	2.49515e-99	S3	Dhrs4
9.80592e-104	0.376193	0.261	0.077	2.74546e-99	S3	Acox3
2.50371e-103	0.441957	0.367	0.142	7.00988e-99	S3	Tmem174
1.08843e-102	0.442528	0.47	0.214	3.04737e-98	S3	BC026585
2.88964e-102	0.38697	0.606	0.318	8.09043e-98	S3	Pth1r
1.5598e-101	0.414314	0.616	0.325	4.36714e-97	S3	Bdh2
1.69174e-101	0.376353	0.292	0.095	4.73653e-97	S3	Slc16a2
2.48122e-101	0.38864	0.547	0.267	6.94692e-97	S3	Cldn10
2.51871e-101	0.395895	0.851	0.603	7.05189e-97	S3	Mrps21
2.78538e-101	0.448643	0.484	0.229	7.79851e-97	S3	Thoc7
2.9758e-101	0.398827	0.318	0.112	8.33164e-97	S3	Aldh8a1
1.01377e-100	0.411908	0.307	0.107	2.83835e-96	S3	Aldh9a1
3.68187e-99	0.422508	0.335	0.124	1.03085e-94	S3	Cideb
1.42275e-98	0.422661	0.438	0.195	3.98342e-94	S3	Gcdh
9.73059e-98	0.417609	0.575	0.303	2.72437e-93	S3	Snhg18
2.36806e-97	0.386547	0.301	0.104	6.63008e-93	S3	Haao
3.93123e-97	0.450372	0.326	0.121	1.10066e-92	S3	Mlxipl
6.03588e-97	0.402259	0.371	0.149	1.68993e-92	S3	Nit1
1.57697e-96	0.411278	0.343	0.131	4.41519e-92	S3	Rora
1.88144e-96	0.389118	0.492	0.23	5.26767e-92	S3	Cryz
1.71747e-95	0.385269	0.525	0.259	4.80858e-91	S3	Mkrn1
2.47558e-94	0.334295	0.942	0.762	6.93112e-90	S3	Ndufa6
5.11623e-94	0.271654	0.527	0.264	1.43244e-89	S3	Gstm1
5.13538e-94	0.329882	0.937	0.797	1.4378e-89	S3	Ybx1
4.89494e-93	0.310581	0.981	0.883	1.37049e-88	S3	Cycs
1.19433e-92	0.375893	0.893	0.693	3.34387e-88	S3	Errfi1
2.85356e-92	0.408472	0.404	0.173	7.9894e-88	S3	Cmbl
6.57573e-92	0.417068	0.401	0.175	1.84107e-87	S3	Fuca2
1.20697e-91	0.394634	0.626	0.342	3.37927e-87	S3	Akr7a5
1.47395e-91	0.400072	0.346	0.138	4.12676e-87	S3	Coa6
1.72078e-91	0.412268	0.588	0.32	4.81785e-87	S3	Mien1
1.17628e-90	0.367867	0.299	0.107	3.29335e-86	S3	Dhcr24
1.54664e-90	0.336394	0.741	0.429	4.33029e-86	S3	Glyat
1.82569e-90	0.390485	0.412	0.183	5.11156e-86	S3	Adhfe1
1.19489e-89	0.368953	0.916	0.716	3.34544e-85	S3	Ndufb4
1.80387e-89	0.400884	0.35	0.143	5.05049e-85	S3	Reep5
3.81939e-89	0.398076	0.707	0.439	1.06935e-84	S3	Med28
4.10088e-89	0.395515	0.542	0.273	1.14816e-84	S3	Pecr
7.60041e-89	0.398551	0.523	0.269	2.12796e-84	S3	Cldn2
7.69423e-89	0.366354	0.474	0.227	2.15423e-84	S3	Far1
7.80671e-89	0.39305	0.449	0.211	2.18572e-84	S3	Csrp2
8.08595e-89	0.346598	0.266	0.089	2.2639e-84	S3	Brap
3.82359e-88	0.373924	0.342	0.138	1.07053e-83	S3	Pgpep1
5.30246e-88	0.414516	0.395	0.175	1.48458e-83	S3	Hist2h2aa1
4.42613e-87	0.412373	0.314	0.121	1.23923e-82	S3	Apom
1.40533e-86	0.403388	0.682	0.419	3.93465e-82	S3	Bola3
1.38894e-85	0.373879	0.309	0.118	3.88876e-81	S3	Gss
2.95441e-85	0.39815	0.505	0.257	8.27176e-81	S3	Iah1
1.59271e-84	0.378992	0.549	0.295	4.45927e-80	S3	C1d
1.65252e-83	0.39659	0.551	0.296	4.62672e-79	S3	Phyh
1.82372e-83	0.391061	0.429	0.204	5.10605e-79	S3	Mlec
9.23672e-83	0.340433	0.262	0.091	2.5861e-78	S3	Lrg1
1.14845e-82	0.395602	0.265	0.094	3.21544e-78	S3	Pxmp2
1.32598e-82	0.349034	0.574	0.313	3.71248e-78	S3	Smim1
2.26595e-82	0.341603	0.313	0.122	6.34421e-78	S3	Xylb
2.44849e-82	0.382772	0.442	0.213	6.85528e-78	S3	Lrpap1
3.32889e-82	0.372254	0.466	0.227	9.32023e-78	S3	Fuca1
9.73673e-82	0.347556	0.297	0.113	2.72609e-77	S3	Hebp1
1.03204e-81	0.343728	0.442	0.207	2.88951e-77	S3	Tcea3
1.44754e-81	0.403054	0.586	0.333	4.05283e-77	S3	Acat1
3.91033e-81	0.393899	0.351	0.151	1.09481e-76	S3	Nfia
4.05137e-81	0.357144	0.665	0.399	1.1343e-76	S3	Sephs2
6.88808e-81	0.357927	0.499	0.252	1.92852e-76	S3	Fmo1
7.19172e-81	0.276344	0.395	0.173	2.01354e-76	S3	Slco3a1
2.98336e-80	0.341682	0.81	0.574	8.35281e-76	S3	Anapc13
5.68524e-80	0.368088	0.418	0.196	1.59175e-75	S3	Pcx
7.37768e-80	0.386805	0.706	0.454	2.0656e-75	S3	Higd2a
1.06791e-78	0.340663	0.327	0.135	2.98993e-74	S3	Hnf4a
1.07301e-77	0.353634	0.406	0.189	3.00423e-73	S3	Grhpr
1.93734e-77	0.309895	0.309	0.123	5.42416e-73	S3	Gpr137b
2.16984e-77	0.366116	0.525	0.284	6.07512e-73	S3	Emc6
5.27462e-77	0.355805	0.452	0.226	1.47679e-72	S3	Stard10
7.35116e-75	0.370403	0.376	0.172	2.05818e-70	S3	Slc22a18
1.67073e-74	0.343035	0.745	0.476	4.6777e-70	S3	Ddt
2.1342e-74	0.336668	0.53	0.282	5.97532e-70	S3	Sfxn1
2.17176e-74	0.329248	0.384	0.179	6.0805e-70	S3	Lrrc58
3.76841e-74	0.324201	0.36	0.162	1.05508e-69	S3	Gm5617
4.27612e-74	0.334007	0.811	0.576	1.19723e-69	S3	Nop10
8.25884e-74	0.336972	0.337	0.146	2.31231e-69	S3	Abca3
3.94775e-73	0.296432	0.611	0.339	1.10529e-68	S3	Pdzk1
6.61838e-73	0.344845	0.42	0.207	1.85301e-68	S3	Ankrd13c
1.73327e-72	0.371124	0.334	0.147	4.8528e-68	S3	Acads
2.26487e-72	0.281518	0.955	0.844	6.34119e-68	S3	mt-Nd5
4.98011e-72	0.354937	0.581	0.342	1.39433e-67	S3	Tns1
5.57208e-72	0.3383	0.33	0.144	1.56007e-67	S3	Slc37a4
9.81198e-72	0.330797	0.288	0.116	2.74716e-67	S3	Eci2
1.08957e-71	0.298143	0.574	0.315	3.05059e-67	S3	Fut9
4.50707e-71	0.337223	0.605	0.365	1.26189e-66	S3	Hspd1
4.61607e-71	0.334966	0.576	0.33	1.29241e-66	S3	Mrps36
6.56951e-71	0.328387	0.318	0.137	1.83933e-66	S3	Timd2
1.57773e-70	0.337543	0.442	0.224	4.41732e-66	S3	Mrpl57
2.14174e-70	0.330569	0.689	0.436	5.99644e-66	S3	Mrpl42
5.78135e-70	0.280387	0.737	0.452	1.61866e-65	S3	Fbp1
1.50078e-69	0.304392	0.259	0.099	4.20188e-65	S3	Zfp787
3.38136e-69	0.307128	0.262	0.101	9.46714e-65	S3	Slc35a3
4.31e-69	0.333279	0.426	0.214	1.20671e-64	S3	Hpn
2.80368e-68	0.322641	0.696	0.44	7.84974e-64	S3	Tmem176b
3.20358e-68	0.33314	0.359	0.165	8.96939e-64	S3	Aspdh
3.78051e-68	0.346868	0.387	0.189	1.05847e-63	S3	Tob1
1.147e-67	0.313627	0.316	0.138	3.21137e-63	S3	2310030G06Rik
1.42899e-67	0.286158	0.447	0.225	4.00088e-63	S3	Abcg2
2.44819e-67	0.365136	0.777	0.552	6.85444e-63	S3	Iscu
2.55864e-67	0.286207	0.844	0.585	7.16367e-63	S3	Hint2
3.60569e-67	0.323302	0.77	0.538	1.00952e-62	S3	Timm13
5.96517e-67	0.341925	0.345	0.161	1.67013e-62	S3	Smarca2
7.74232e-67	0.311589	0.314	0.136	2.16769e-62	S3	Slc51b
1.30059e-66	0.31033	0.475	0.255	3.64139e-62	S3	Osbpl9
8.75759e-66	0.408128	0.544	0.325	2.45195e-61	S3	Ech1
1.30506e-65	0.306437	0.321	0.142	3.65392e-61	S3	Erich4
3.01297e-65	0.314515	0.738	0.5	8.4357e-61	S3	Usp50
1.16125e-64	0.314447	0.31	0.138	3.25128e-60	S3	Ivd
2.00801e-64	0.309462	0.406	0.204	5.62203e-60	S3	Ppdpf
2.2209e-64	0.311277	0.47	0.253	6.21806e-60	S3	Tomm5
5.81404e-64	0.306249	0.325	0.148	1.62782e-59	S3	Nap1l1
1.36237e-63	0.307943	0.716	0.48	3.81435e-59	S3	Tcn2
1.38755e-63	0.31351	0.641	0.402	3.88485e-59	S3	Vdac1
2.66408e-63	0.324595	0.542	0.314	7.45889e-59	S3	Map1lc3a
5.11437e-63	0.264182	0.253	0.1	1.43192e-58	S3	Ifrd2
5.12091e-63	0.307112	0.436	0.227	1.43375e-58	S3	Cisd3
2.81175e-62	0.31157	0.424	0.221	7.87233e-58	S3	Dao
4.22335e-62	0.295279	0.278	0.118	1.18245e-57	S3	Sardh
1.05036e-61	0.311875	0.378	0.186	2.94079e-57	S3	Nr1h4
1.15809e-61	0.277146	0.277	0.117	3.24243e-57	S3	Pbld2
9.18057e-61	0.298399	0.313	0.142	2.57038e-56	S3	Slc22a1
2.17346e-60	0.254632	0.694	0.436	6.08525e-56	S3	Igfbp4
2.01697e-59	0.306116	0.435	0.235	5.64712e-55	S3	Rnf11
2.20262e-59	0.269694	0.369	0.182	6.16689e-55	S3	Chd3
5.2109e-59	0.306825	0.278	0.122	1.45895e-54	S3	Echdc2
5.61806e-59	0.27759	0.333	0.156	1.57294e-54	S3	Slc1a1
1.38064e-58	0.342734	0.76	0.538	3.86553e-54	S3	Etfb
1.51415e-57	0.298013	0.314	0.145	4.23931e-53	S3	Susd3
1.92262e-57	0.272094	0.303	0.138	5.38294e-53	S3	Ndufaf4
2.74416e-57	0.29552	0.267	0.114	7.6831e-53	S3	2300009A05Rik
4.02818e-57	0.289954	0.335	0.162	1.12781e-52	S3	Tkfc
1.71709e-56	0.36347	0.422	0.233	4.8075e-52	S3	Gstp1
1.81115e-56	0.300142	0.365	0.185	5.07087e-52	S3	Deb1
1.91324e-56	0.270447	0.743	0.508	5.35668e-52	S3	Glul
5.30343e-56	0.266309	0.256	0.109	1.48486e-51	S3	Galnt1
6.45721e-56	0.2762	0.317	0.15	1.80789e-51	S3	Slc30a5
7.27527e-56	0.289191	0.416	0.221	2.03693e-51	S3	Fahd1
9.44266e-56	0.257487	0.813	0.581	2.64376e-51	S3	Tmem256
1.0837e-55	0.299879	0.484	0.274	3.03415e-51	S3	Msra
1.35738e-55	0.288821	0.48	0.275	3.80038e-51	S3	Sypl
6.04142e-55	0.319954	0.566	0.354	1.69148e-50	S3	Mrpl12
7.14159e-55	0.29734	0.664	0.44	1.9995e-50	S3	Timm8b
1.80767e-54	0.27605	0.659	0.431	5.06112e-50	S3	Tomm20
2.30573e-54	0.288238	0.69	0.471	6.45558e-50	S3	Bri3
3.66478e-54	0.336302	0.417	0.232	1.02607e-49	S3	Pik3r1
4.42497e-54	0.26117	0.272	0.121	1.2389e-49	S3	Rnf145
5.44105e-54	0.278104	0.61	0.385	1.52339e-49	S3	Calm3
5.85813e-54	0.256065	0.831	0.619	1.64016e-49	S3	Romo1
1.20579e-53	0.295122	0.536	0.326	3.37597e-49	S3	Pfdn2
1.4614e-53	0.256985	0.394	0.207	4.09162e-49	S3	Itgb8
8.30415e-53	0.288908	0.484	0.279	2.325e-48	S3	Bloc1s1
1.45962e-52	0.254001	0.254	0.11	4.08664e-48	S3	Fmo2
4.35111e-52	0.277244	0.306	0.147	1.21822e-47	S3	Slc25a10
4.54078e-52	0.285099	0.538	0.328	1.27133e-47	S3	1110008F13Rik
5.03642e-52	0.270684	0.827	0.624	1.4101e-47	S3	Smdt1
5.26945e-52	0.267563	0.791	0.582	1.47534e-47	S3	Tomm7
5.88896e-52	0.273509	0.36	0.186	1.64879e-47	S3	Rab11fip3
1.07419e-51	0.295414	0.608	0.401	3.00753e-47	S3	Rbm47
1.58947e-51	0.268486	0.338	0.171	4.45021e-47	S3	Toporsos
1.83856e-51	0.275094	0.364	0.189	5.14761e-47	S3	Polr2i
3.17169e-51	0.257182	0.727	0.501	8.88011e-47	S3	Nme1
5.10294e-51	0.287623	0.38	0.203	1.42872e-46	S3	1500011K16Rik
6.13024e-51	0.284318	0.55	0.339	1.71635e-46	S3	Acot13
7.86738e-51	0.276887	0.979	0.874	2.20271e-46	S3	Prdx1
1.53621e-50	0.275631	0.288	0.138	4.30107e-46	S3	Gatad1
2.22421e-50	0.261521	0.531	0.317	6.22733e-46	S3	Mrpl14
2.41771e-50	0.265214	0.714	0.49	6.76911e-46	S3	Polr2l
4.16854e-50	0.277154	0.288	0.138	1.16711e-45	S3	Decr1
5.2077e-50	0.268475	0.391	0.214	1.45805e-45	S3	B4galt5
1.80867e-49	0.286498	0.486	0.289	5.06391e-45	S3	Mrpl20
2.30045e-49	0.274632	0.466	0.27	6.44079e-45	S3	Naa38
2.32273e-49	0.278396	0.689	0.472	6.50318e-45	S3	Gm10053
2.83012e-49	0.26245	0.322	0.162	7.92378e-45	S3	Jtb
4.32536e-49	0.261224	0.282	0.135	1.21101e-44	S3	Sdhaf4
6.05972e-49	0.27703	0.638	0.418	1.6966e-44	S3	Grcc10
6.9481e-49	0.298239	0.449	0.264	1.94533e-44	S3	Klf9
1.0103e-48	0.27905	0.463	0.27	2.82864e-44	S3	Mrpl34
1.45112e-48	0.263706	0.586	0.372	4.06283e-44	S3	Skp1a
1.56588e-48	0.275229	0.336	0.174	4.38415e-44	S3	Atraid
1.56603e-48	0.26887	0.318	0.16	4.38458e-44	S3	Mrpl36
2.07323e-48	0.285235	0.522	0.322	5.80463e-44	S3	Cox20
2.10524e-48	0.250093	0.31	0.156	5.89425e-44	S3	Prkaa2
1.05409e-47	0.251956	0.289	0.14	2.95125e-43	S3	Nrp1
1.11873e-47	0.265647	0.493	0.298	3.13223e-43	S3	1810058I24Rik
1.19225e-47	0.259274	0.312	0.157	3.33807e-43	S3	Aamdc
1.2974e-47	0.257945	0.276	0.131	3.63246e-43	S3	Pipox
4.42395e-47	0.263464	0.592	0.387	1.23862e-42	S3	Txnip
2.61005e-46	0.27166	0.452	0.262	7.30761e-42	S3	Cib1
9.84204e-46	0.258641	0.376	0.206	2.75558e-41	S3	Aldh1l1
1.13289e-45	0.271751	0.438	0.256	3.17187e-41	S3	Gstt2
3.49284e-45	0.259929	0.701	0.488	9.77926e-41	S3	Tmbim4
6.36801e-44	0.396716	0.449	0.282	1.78292e-39	S3	Dnase1
1.16508e-43	0.267508	0.278	0.138	3.26198e-39	S3	Tm2d2
6.37688e-43	0.262616	0.546	0.354	1.7854e-38	S3	Polr2k
1.77745e-42	0.287638	0.384	0.22	4.97652e-38	S3	BC005561
1.90742e-42	0.255144	0.349	0.193	5.3404e-38	S3	Mut
5.22812e-40	0.261793	0.428	0.255	1.46377e-35	S3	Tmem37
1.13064e-39	0.250511	0.588	0.391	3.16557e-35	S3	Etfa
0	2.08552	0.833	0.018	0	S3T2	Cyp7b1
0	1.58422	0.542	0.004	0	S3T2	Serpina1d
0	1.51222	0.7	0.015	0	S3T2	Slc22a7
0	1.46197	0.667	0.004	0	S3T2	Serpina1f
0	1.32865	0.642	0.013	0	S3T2	Scd1
0	1.29228	0.358	0.002	0	S3T2	Serpina1a
0	1.27397	0.467	0.004	0	S3T2	Bcat1
0	1.24582	0.6	0.007	0	S3T2	Mettl7a2
0	0.849506	0.317	0	0	S3T2	Akr1c18
0	0.830326	0.45	0.002	0	S3T2	Slco4c1
0	0.729056	0.425	0.008	0	S3T2	Myo5a
0	0.727641	0.342	0.003	0	S3T2	Slc22a13
7.79597e-295	0.952575	0.475	0.012	2.18272e-290	S3T2	Mep1b
3.29594e-230	0.525046	0.308	0.006	9.22798e-226	S3T2	Irx1
2.19472e-217	0.846544	0.367	0.01	6.14478e-213	S3T2	Aqp4
6.94803e-183	1.42594	0.775	0.071	1.94531e-178	S3T2	Gpm6a
3.14043e-179	1.61331	0.783	0.073	8.79256e-175	S3T2	Cryab
6.39124e-177	0.689352	0.383	0.015	1.78942e-172	S3T2	Slc39a8
3.92256e-168	1.69932	0.858	0.102	1.09824e-163	S3T2	Cdo1
2.67453e-161	1.14197	0.675	0.057	7.48815e-157	S3T2	Gramd1b
2.32042e-157	1.05512	0.517	0.033	6.49672e-153	S3T2	Hsd11b1
7.1229e-149	1.18585	0.767	0.08	1.99427e-144	S3T2	Apob
1.76459e-141	1.1183	0.6	0.051	4.9405e-137	S3T2	Cyp2a4
1.64267e-132	1.11096	0.65	0.066	4.59913e-128	S3T2	Akr1c14
5.73525e-129	0.946504	0.592	0.053	1.60576e-124	S3T2	Mme
1.47152e-123	0.978898	0.592	0.057	4.11996e-119	S3T2	Fgf1
1.03516e-111	0.758555	0.417	0.03	2.89825e-107	S3T2	Tspan13
4.92098e-111	0.792091	0.55	0.053	1.37777e-106	S3T2	Ppic
1.4282e-107	0.959211	0.567	0.06	3.99867e-103	S3T2	Cyp51
2.20138e-105	2.34341	1	0.303	6.16342e-101	S3T2	Napsa
4.94383e-98	1.56252	0.883	0.189	1.38417e-93	S3T2	Acsm3
3.68997e-95	1.35563	0.892	0.183	1.03312e-90	S3T2	Tmigd1
7.58527e-95	0.732204	0.483	0.048	2.12372e-90	S3T2	C1qtnf3
7.89161e-93	1.66385	0.908	0.24	2.20949e-88	S3T2	Mpv17l
4.57053e-92	0.696105	0.433	0.04	1.27966e-87	S3T2	Nt5e
2.27878e-89	0.776253	0.542	0.063	6.38012e-85	S3T2	Slc23a1
1.51973e-85	1.79474	0.958	0.316	4.25493e-81	S3T2	Mep1a
1.29232e-84	1.69459	0.992	0.404	3.61824e-80	S3T2	Ghr
5.52666e-79	0.732887	0.325	0.026	1.54735e-74	S3T2	Apoc3
1.0659e-77	0.724743	0.492	0.06	2.98431e-73	S3T2	Ace
2.5175e-76	1.6126	0.967	0.349	7.0485e-72	S3T2	Crot
1.77981e-75	1.13821	0.733	0.147	4.98311e-71	S3T2	Aqp1
1.15163e-74	0.677226	0.4	0.041	3.22435e-70	S3T2	BC035947
2.70832e-74	0.665017	0.467	0.056	7.58275e-70	S3T2	Bdh1
2.26493e-72	1.48445	0.858	0.24	6.34134e-68	S3T2	Slc7a13
2.36815e-72	1.04844	0.65	0.118	6.63036e-68	S3T2	Csad
5.7949e-72	0.88306	0.325	0.029	1.62246e-67	S3T2	Ccl28
1.96913e-71	1.19405	0.758	0.164	5.51316e-67	S3T2	Aadat
2.37395e-70	1.28821	0.833	0.209	6.64658e-66	S3T2	Slc5a8
6.46412e-67	1.03922	0.717	0.152	1.80982e-62	S3T2	Slc6a18
7.08917e-67	1.00835	0.708	0.151	1.98482e-62	S3T2	Entpd5
8.29453e-67	0.961243	0.692	0.134	2.3223e-62	S3T2	Slc3a1
1.59729e-65	0.702408	0.475	0.064	4.47209e-61	S3T2	Kcnk1
9.16216e-65	0.47976	0.267	0.021	2.56522e-60	S3T2	Mfsd2a
1.81294e-64	1.49549	0.958	0.427	5.07587e-60	S3T2	Acadm
5.30538e-62	1.2092	0.933	0.322	1.4854e-57	S3T2	Pank1
5.19875e-61	0.6081	0.408	0.052	1.45554e-56	S3T2	Slc10a2
6.6231e-57	0.86959	0.542	0.098	1.85434e-52	S3T2	Hist1h1c
4.30378e-56	1.28819	1	0.674	1.20497e-51	S3T2	Slc27a2
4.00597e-54	1.19178	0.892	0.321	1.12159e-49	S3T2	Gstm1
1.34983e-53	0.777255	0.492	0.084	3.77925e-49	S3T2	Cbs
1.72062e-53	1.10017	0.783	0.231	4.8174e-49	S3T2	Ugt3a1
7.26416e-53	0.796123	0.642	0.14	2.03382e-48	S3T2	Cth
9.3245e-51	0.832123	0.592	0.124	2.61067e-46	S3T2	D630029K05Rik
1.11884e-50	1.0274	0.842	0.254	3.13254e-46	S3T2	Cd36
4.70603e-50	1.10045	0.917	0.381	1.31759e-45	S3T2	Gclm
4.60963e-48	0.613105	0.417	0.067	1.2906e-43	S3T2	Lipo1
3.97861e-47	0.729018	0.667	0.158	1.11393e-42	S3T2	Gss
2.12918e-46	1.05103	0.942	0.426	5.96129e-42	S3T2	Nudt19
3.73363e-46	0.783246	0.733	0.197	1.04534e-41	S3T2	Gchfr
5.30033e-46	0.873463	0.608	0.137	1.48399e-41	S3T2	Abhd2
5.92414e-46	0.526567	0.383	0.058	1.65864e-41	S3T2	Tmco3
8.29116e-45	0.483666	0.358	0.052	2.32136e-40	S3T2	Pantr1
2.77951e-44	0.705826	0.533	0.113	7.78207e-40	S3T2	Ugdh
4.34572e-44	1.14743	0.892	0.369	1.21672e-39	S3T2	Defb29
1.16512e-43	0.704034	0.492	0.098	3.2621e-39	S3T2	Fmo5
8.07657e-43	0.470554	0.258	0.03	2.26128e-38	S3T2	Slc41a2
2.93282e-42	1.03978	0.85	0.37	8.21132e-38	S3T2	Gcnt1
6.94307e-42	0.631453	0.375	0.062	1.94392e-37	S3T2	Slc9a8
8.25253e-41	0.656708	1	1	2.31054e-36	S3T2	mt-Nd1
1.44039e-40	0.548913	0.358	0.058	4.0328e-36	S3T2	Slc6a13
3.05683e-40	1.05884	0.858	0.376	8.55852e-36	S3T2	Atp11a
7.93476e-40	0.914703	0.975	0.769	2.22157e-35	S3T2	Chpt1
6.44975e-39	0.647096	0.483	0.103	1.8058e-34	S3T2	Mtor
1.27345e-38	0.783032	0.517	0.12	3.56539e-34	S3T2	Cyp4a10
1.29196e-38	1.01424	0.442	0.092	3.61723e-34	S3T2	Macrod1
2.02772e-38	0.499022	0.308	0.046	5.67722e-34	S3T2	Cyp2j11
2.6978e-38	1.03638	0.908	0.448	7.5533e-34	S3T2	Ugt3a2
1.47657e-37	0.851297	0.833	0.33	4.13409e-33	S3T2	Lypla1
2.92065e-37	1.21983	1	0.868	8.17723e-33	S3T2	Kap
4.2535e-37	0.482807	0.342	0.056	1.1909e-32	S3T2	Galns
1.32085e-36	1.03605	0.8	0.329	3.69813e-32	S3T2	Slc6a6
2.1565e-36	0.552525	0.483	0.104	6.03777e-32	S3T2	Tef
2.05666e-35	0.855376	0.933	0.55	5.75823e-31	S3T2	Psap
8.28698e-35	0.425752	0.333	0.057	2.32019e-30	S3T2	Casc4
9.52798e-35	0.84675	0.892	0.463	2.66764e-30	S3T2	Gk
1.00874e-34	0.623858	0.55	0.139	2.82426e-30	S3T2	Itfg1
1.26289e-34	0.705117	1	0.872	3.53584e-30	S3T2	Gpx4
1.35831e-34	0.513766	0.417	0.083	3.80299e-30	S3T2	Bhmt2
4.55489e-34	0.452329	0.275	0.04	1.27528e-29	S3T2	Hmgcr
5.3644e-34	0.606796	0.483	0.112	1.50193e-29	S3T2	Slc16a9
1.07179e-33	0.503749	0.392	0.077	3.00078e-29	S3T2	Gm15217
1.43614e-33	0.461388	0.292	0.046	4.02091e-29	S3T2	Gltp
1.2804e-32	0.502003	0.375	0.074	3.58487e-28	S3T2	Med14
4.65063e-32	0.482014	0.342	0.063	1.30208e-27	S3T2	Cyp2d9
7.49417e-32	0.747122	0.742	0.282	2.09822e-27	S3T2	Far1
8.74419e-31	0.494611	0.325	0.06	2.4482e-26	S3T2	Nqo1
9.98387e-31	0.740801	0.733	0.273	2.79528e-26	S3T2	Nceh1
1.40243e-30	0.547439	0.383	0.081	3.92652e-26	S3T2	Sqle
1.47723e-30	0.492162	0.433	0.098	4.13596e-26	S3T2	Slc22a2
2.17719e-30	1.24662	0.75	0.328	6.0957e-26	S3T2	Gclc
2.78717e-30	0.601645	0.458	0.114	7.80351e-26	S3T2	Idi1
3.03145e-30	0.699983	0.95	0.522	8.48745e-26	S3T2	Cyp2j5
4.26324e-30	0.506726	0.275	0.046	1.19362e-25	S3T2	Acy1
1.71814e-29	0.698322	0.858	0.357	4.81045e-25	S3T2	Slc22a12
1.98716e-29	0.658093	0.758	0.269	5.56366e-25	S3T2	Pter
2.6758e-29	0.723181	0.633	0.207	7.4917e-25	S3T2	Tmem189
2.72492e-29	0.522134	1	1	7.62924e-25	S3T2	mt-Atp6
2.91074e-29	0.69599	0.725	0.263	8.14949e-25	S3T2	Lrpap1
3.65254e-29	0.489441	0.45	0.109	1.02264e-24	S3T2	Acss2
1.5761e-28	0.726484	0.792	0.324	4.41277e-24	S3T2	Ldhd
3.30353e-28	0.442534	0.258	0.043	9.24923e-24	S3T2	D10Wsu102e
6.98656e-28	0.367127	0.292	0.053	1.9561e-23	S3T2	Glb1l2
1.2115e-27	0.379094	0.3	0.056	3.39197e-23	S3T2	Slc30a1
1.30669e-27	0.634076	0.667	0.225	3.65846e-23	S3T2	Fuca2
1.42991e-27	0.709887	0.833	0.372	4.00347e-23	S3T2	Ggt1
2.19554e-27	0.437653	0.375	0.083	6.14706e-23	S3T2	Mfap3l
2.6853e-27	0.505408	0.417	0.099	7.5183e-23	S3T2	Slc15a2
3.11746e-27	0.441844	0.45	0.112	8.72827e-23	S3T2	Cers6
7.89894e-27	0.673527	0.8	0.339	2.21155e-22	S3T2	Lap3
1.19003e-26	0.430772	1	0.997	3.33185e-22	S3T2	Fth1
1.84347e-26	0.772604	1	0.781	5.16134e-22	S3T2	Guca2b
5.99358e-26	0.713679	0.95	0.532	1.67808e-21	S3T2	Acy3
6.75131e-26	0.499772	0.292	0.057	1.89023e-21	S3T2	Acot1
1.30405e-25	0.61454	0.533	0.164	3.65109e-21	S3T2	Abcc2
2.59711e-25	0.53354	0.6	0.195	7.27138e-21	S3T2	Fam213a
3.37077e-25	0.612856	0.8	0.327	9.43748e-21	S3T2	Lactb2
4.0258e-25	0.61274	0.525	0.161	1.12714e-20	S3T2	Cyp4a31
5.39392e-25	0.684919	0.725	0.292	1.51019e-20	S3T2	Ehhadh
1.03716e-24	0.415134	0.358	0.082	2.90385e-20	S3T2	Asah1
1.12373e-24	0.689241	0.742	0.326	3.14623e-20	S3T2	Hmgcs1
1.20892e-24	0.549692	0.583	0.188	3.38473e-20	S3T2	Ak4
1.79523e-24	0.526375	0.417	0.11	5.02628e-20	S3T2	Tmem19
3.68123e-24	0.574155	0.433	0.119	1.03067e-19	S3T2	Trap1
1.50408e-23	0.496055	1	0.963	4.21112e-19	S3T2	mt-Nd2
5.83859e-23	0.463437	1	0.998	1.63469e-18	S3T2	mt-Co2
1.14062e-22	0.4001	0.275	0.057	3.1935e-18	S3T2	Eaf2
1.24909e-22	0.693022	0.767	0.36	3.4972e-18	S3T2	Sod1
1.48508e-22	0.625076	0.9	0.482	4.15793e-18	S3T2	Cat
2.05592e-22	0.777032	0.775	0.366	5.75615e-18	S3T2	Lpl
2.42208e-22	0.611805	0.692	0.289	6.78135e-18	S3T2	Me1
2.50941e-22	0.612688	0.992	0.684	7.02585e-18	S3T2	Ttc36
2.60927e-22	0.458518	0.408	0.111	7.30542e-18	S3T2	Csnk1g3
2.81856e-22	0.408937	0.342	0.082	7.89141e-18	S3T2	Slc16a4
3.08887e-22	0.552941	0.533	0.179	8.64823e-18	S3T2	Wwp1
3.31323e-22	0.668203	0.942	0.534	9.27639e-18	S3T2	Calml4
3.50691e-22	0.374818	0.267	0.054	9.81865e-18	S3T2	Cdr2
5.2578e-22	0.508603	0.517	0.165	1.47208e-17	S3T2	Osbpl8
6.79106e-22	0.628025	0.675	0.261	1.90136e-17	S3T2	Nhp2
2.55499e-21	0.682755	0.817	0.39	7.15346e-17	S3T2	Acat1
2.58741e-21	0.60992	0.55	0.189	7.24423e-17	S3T2	Reep5
5.16252e-21	0.576562	0.683	0.276	1.4454e-16	S3T2	Stard10
1.82193e-20	0.547778	0.65	0.244	5.10104e-16	S3T2	Slc22a30
1.96047e-20	0.656812	0.908	0.55	5.48891e-16	S3T2	Fga
2.48479e-20	0.574328	0.958	0.748	6.9569e-16	S3T2	Mpc2
4.71694e-20	0.584816	0.6	0.233	1.32065e-15	S3T2	Tob1
6.69507e-20	0.448519	0.525	0.176	1.87449e-15	S3T2	Ivd
9.01496e-20	0.459998	0.55	0.189	2.52401e-15	S3T2	9530068E07Rik
1.22559e-19	0.531038	0.625	0.254	3.43141e-15	S3T2	Ankrd13c
1.2497e-19	0.545757	0.975	0.688	3.49892e-15	S3T2	H2afj
1.45178e-19	0.370203	0.367	0.099	4.06469e-15	S3T2	Gm27216
2.09964e-19	0.356151	0.358	0.097	5.87858e-15	S3T2	Slc6a20b
3.59675e-19	0.398672	0.358	0.098	1.00702e-14	S3T2	Cpd
3.97776e-19	0.525061	0.975	0.723	1.11369e-14	S3T2	Scp2
4.48577e-19	0.339045	0.358	0.096	1.25593e-14	S3T2	AI317395
6.16462e-19	0.377445	0.267	0.062	1.72597e-14	S3T2	Fat1
6.76914e-19	0.393947	0.458	0.143	1.89522e-14	S3T2	Ugt8a
1.42874e-18	0.497292	0.475	0.159	4.0002e-14	S3T2	Ccng1
1.56225e-18	0.369753	1	0.995	4.374e-14	S3T2	mt-Nd4
2.30908e-18	0.443592	0.417	0.129	6.46496e-14	S3T2	Slc39a14
2.77149e-18	0.448799	0.642	0.251	7.75961e-14	S3T2	Hykk
4.41309e-18	0.33998	0.308	0.079	1.23558e-13	S3T2	Ackr3
4.52617e-18	0.478185	0.667	0.27	1.26724e-13	S3T2	Kcnk5
5.05683e-18	0.420931	0.308	0.082	1.41581e-13	S3T2	Ntn1
5.29177e-18	0.525275	0.633	0.264	1.48159e-13	S3T2	Slc47a1
6.18439e-18	0.453672	0.783	0.335	1.7315e-13	S3T2	RP23-306P12.2
1.01258e-17	0.486345	0.692	0.302	2.83503e-13	S3T2	Aplp2
1.85801e-17	0.531183	0.942	0.628	5.20205e-13	S3T2	Vamp8
2.74319e-17	0.331826	0.308	0.082	7.6804e-13	S3T2	Paqr9
3.1439e-17	0.380327	0.467	0.158	8.8023e-13	S3T2	Wwc1
4.64474e-17	0.427969	0.567	0.212	1.30043e-12	S3T2	Nudt4
4.65136e-17	0.51502	0.417	0.142	1.30229e-12	S3T2	Galnt1
6.5372e-17	0.410912	0.392	0.123	1.83029e-12	S3T2	Lpgat1
9.79408e-17	0.51097	0.6	0.244	2.74215e-12	S3T2	Cpeb4
1.00201e-16	0.486751	0.95	0.685	2.80542e-12	S3T2	Tmbim6
1.47421e-16	0.536586	0.558	0.225	4.1275e-12	S3T2	Hist2h2aa1
1.71838e-16	0.3424	0.35	0.102	4.81113e-12	S3T2	Lrrk2
1.92745e-16	0.443988	0.458	0.162	5.39646e-12	S3T2	Sod3
3.19999e-16	0.306417	0.283	0.074	8.95932e-12	S3T2	Ahcy
4.1031e-16	0.455427	0.717	0.334	1.14879e-11	S3T2	Slc17a3
4.22275e-16	0.330873	0.308	0.086	1.18229e-11	S3T2	C1galt1
4.92935e-16	0.4752	0.867	0.528	1.38012e-11	S3T2	Oxct1
5.44308e-16	0.343592	0.35	0.105	1.52395e-11	S3T2	Tpmt
5.79348e-16	0.341589	0.333	0.097	1.62206e-11	S3T2	Adtrp
7.95332e-16	0.279482	0.275	0.072	2.22677e-11	S3T2	L2hgdh
8.06545e-16	0.288881	0.317	0.089	2.25816e-11	S3T2	Rdh16
8.66103e-16	0.368178	0.408	0.133	2.42492e-11	S3T2	Pxmp2
1.30305e-15	0.466157	0.55	0.218	3.64828e-11	S3T2	Slc22a18
1.32026e-15	0.46789	0.975	0.852	3.69646e-11	S3T2	mt-Nd4l
1.3345e-15	0.366911	0.358	0.111	3.73633e-11	S3T2	Chdh
1.99228e-15	0.325904	0.408	0.134	5.57798e-11	S3T2	Ubqln1
2.03346e-15	0.35504	0.35	0.107	5.69329e-11	S3T2	Ints2
2.57306e-15	0.322722	0.275	0.074	7.20405e-11	S3T2	Glyctk
3.24075e-15	0.504129	0.85	0.482	9.07345e-11	S3T2	Tmem176a
3.2431e-15	0.473489	0.933	0.63	9.08004e-11	S3T2	Nop10
4.06088e-15	0.446013	0.517	0.206	1.13697e-10	S3T2	Cmtm6
4.069e-15	0.410356	0.458	0.171	1.13924e-10	S3T2	Gatad1
4.24709e-15	0.319621	0.342	0.104	1.1891e-10	S3T2	Galc
5.93864e-15	0.388417	0.442	0.155	1.6627e-10	S3T2	2200002D01Rik
5.96917e-15	0.444162	0.983	0.786	1.67125e-10	S3T2	Rps27l
7.50306e-15	0.279643	0.317	0.093	2.10071e-10	S3T2	Hexb
1.03295e-14	0.589614	0.333	0.107	2.89204e-10	S3T2	Snhg11
1.42731e-14	0.385364	0.5	0.194	3.99617e-10	S3T2	Tmem174
1.53222e-14	0.276083	0.4	0.131	4.2899e-10	S3T2	Atp13a3
1.94335e-14	0.453012	0.608	0.262	5.44099e-10	S3T2	Hpn
1.96596e-14	0.547271	0.667	0.35	5.50428e-10	S3T2	Cd164
2.10698e-14	0.383773	0.325	0.101	5.89911e-10	S3T2	Mettl7b
2.56413e-14	0.319998	0.308	0.092	7.17906e-10	S3T2	Tpk1
3.2815e-14	0.374668	0.483	0.184	9.18753e-10	S3T2	Tmed7
4.44446e-14	0.393176	0.975	0.875	1.24436e-09	S3T2	mt-Atp8
5.03221e-14	0.305214	0.358	0.116	1.40892e-09	S3T2	Secisbp2l
5.24974e-14	0.5992	0.658	0.351	1.46982e-09	S3T2	Itpr1
5.92496e-14	0.288975	0.417	0.143	1.65887e-09	S3T2	Amfr
6.84861e-14	0.593067	0.467	0.188	1.91747e-09	S3T2	Pdk4
7.8504e-14	0.281278	0.267	0.075	2.19796e-09	S3T2	Ablim1
1.08116e-13	0.330483	0.392	0.134	3.02703e-09	S3T2	Coasy
1.33956e-13	0.315471	0.475	0.18	3.75051e-09	S3T2	H1f0
1.48175e-13	0.424722	0.617	0.277	4.14861e-09	S3T2	Ccni
1.4946e-13	0.47749	0.65	0.321	4.18457e-09	S3T2	Sypl
1.50103e-13	0.254844	0.358	0.116	4.20258e-09	S3T2	Rnf10
1.65044e-13	0.423183	0.558	0.249	4.62089e-09	S3T2	Itgb8
2.01446e-13	0.401893	0.533	0.221	5.64009e-09	S3T2	Gm2a
2.01666e-13	0.280082	0.258	0.072	5.64625e-09	S3T2	Glb1
2.3602e-13	0.308738	1	1	6.60808e-09	S3T2	mt-Cytb
2.55569e-13	0.258933	0.3	0.092	7.15543e-09	S3T2	Stmn1
3.01827e-13	0.43678	0.733	0.38	8.45055e-09	S3T2	Dynll1
3.26478e-13	0.388952	0.483	0.196	9.14074e-09	S3T2	Slc1a1
3.79303e-13	0.344352	0.367	0.128	1.06197e-08	S3T2	Nfs1
3.98564e-13	0.454692	0.367	0.129	1.1159e-08	S3T2	Gm11128
4.24004e-13	0.367006	0.975	0.876	1.18713e-08	S3T2	Rpl35a
4.99665e-13	0.331932	0.433	0.162	1.39896e-08	S3T2	Fam120a
5.92467e-13	0.274077	0.308	0.097	1.65879e-08	S3T2	Ankib1
6.49361e-13	0.677012	0.792	0.512	1.81808e-08	S3T2	Mat2a
6.597e-13	0.409712	0.608	0.273	1.84703e-08	S3T2	BC026585
7.72083e-13	0.437674	0.933	0.595	2.16168e-08	S3T2	Lrp2
7.95402e-13	0.332266	0.542	0.224	2.22697e-08	S3T2	Slco3a1
8.07584e-13	0.296026	0.508	0.2	2.26107e-08	S3T2	Tmem243
9.22871e-13	0.391412	0.558	0.242	2.58386e-08	S3T2	BC021785
1.03767e-12	0.382968	0.625	0.287	2.90526e-08	S3T2	Tmem205
1.13397e-12	0.368411	0.492	0.203	3.17488e-08	S3T2	P4hb
1.25034e-12	0.359436	0.408	0.156	3.50071e-08	S3T2	Eif4g3
1.25494e-12	0.377271	0.767	0.401	3.51359e-08	S3T2	Pdzk1
1.32083e-12	0.382843	0.425	0.166	3.69805e-08	S3T2	Gpc4
1.57626e-12	0.34528	0.467	0.184	4.4132e-08	S3T2	Pgpep1
1.6064e-12	0.324545	0.383	0.138	4.49761e-08	S3T2	Slc25a17
1.63566e-12	0.354631	0.475	0.188	4.57951e-08	S3T2	Serpinf2
1.79409e-12	0.344634	0.4	0.149	5.0231e-08	S3T2	Prss8
2.23122e-12	0.423984	0.975	0.684	6.24696e-08	S3T2	Sult1d1
2.26233e-12	0.29103	0.333	0.111	6.33407e-08	S3T2	Slc35e3
2.3298e-12	0.33903	0.817	0.451	6.52296e-08	S3T2	S100a11
2.33533e-12	0.439635	0.5	0.226	6.53847e-08	S3T2	Lrrc58
2.4817e-12	0.330842	0.467	0.187	6.94828e-08	S3T2	Papss2
2.72973e-12	0.399698	0.692	0.35	7.6427e-08	S3T2	Aass
3.71056e-12	0.39934	0.5	0.214	1.03888e-07	S3T2	Bnip3l
4.27405e-12	0.407399	0.667	0.338	1.19665e-07	S3T2	Tnfrsf21
4.59455e-12	0.401854	0.683	0.347	1.28638e-07	S3T2	Lsm4
5.20207e-12	0.42065	0.492	0.207	1.45648e-07	S3T2	Gm5617
5.62773e-12	0.277646	0.35	0.123	1.57565e-07	S3T2	Nipsnap1
5.6911e-12	0.25096	0.292	0.092	1.5934e-07	S3T2	Gprc5c
5.95608e-12	0.441832	0.425	0.174	1.66758e-07	S3T2	Tmem229a
9.03784e-12	0.371043	0.35	0.128	2.53041e-07	S3T2	Slc33a1
1.00085e-11	0.250418	0.4	0.151	2.80219e-07	S3T2	Furin
1.0489e-11	0.341662	0.992	0.957	2.93671e-07	S3T2	Gm10076
1.79165e-11	0.312876	0.417	0.164	5.01627e-07	S3T2	Pipox
2.0871e-11	0.354997	0.475	0.199	5.84348e-07	S3T2	Tmem238
2.52453e-11	0.277836	0.367	0.134	7.06818e-07	S3T2	Proc
2.58785e-11	0.328876	0.342	0.123	7.24546e-07	S3T2	Tead1
2.59415e-11	0.402527	0.35	0.13	7.26309e-07	S3T2	Lrg1
2.6054e-11	0.423973	0.442	0.187	7.2946e-07	S3T2	Cubn
2.77629e-11	0.378278	0.658	0.338	7.77305e-07	S3T2	Slc25a39
2.99071e-11	0.280831	0.35	0.13	8.3734e-07	S3T2	Brap
3.70953e-11	0.256733	0.275	0.089	1.03859e-06	S3T2	Vwa8
3.86195e-11	0.276713	0.408	0.16	1.08127e-06	S3T2	Nfib
4.24602e-11	0.364331	1	0.929	1.1888e-06	S3T2	Ndufa4
4.25206e-11	0.382641	0.667	0.338	1.19049e-06	S3T2	Fkbp2
4.87245e-11	0.301474	1	0.989	1.36419e-06	S3T2	Rpl41
5.18169e-11	0.299966	0.35	0.128	1.45077e-06	S3T2	Impad1
6.61748e-11	0.345103	0.517	0.228	1.85276e-06	S3T2	Gstz1
7.70275e-11	0.256048	0.35	0.13	2.15662e-06	S3T2	Znrf2
7.93569e-11	0.433832	0.683	0.373	2.22183e-06	S3T2	Smim1
8.3985e-11	0.408339	0.733	0.395	2.35141e-06	S3T2	Ccdc107
8.55308e-11	0.260442	0.508	0.217	2.39469e-06	S3T2	Rnf128
8.79199e-11	0.375615	0.825	0.499	2.46158e-06	S3T2	Tmem176b
9.01504e-11	0.40675	0.492	0.221	2.52403e-06	S3T2	Amacr
9.25546e-11	0.274236	0.367	0.139	2.59134e-06	S3T2	Lrp6
1.16951e-10	0.281673	0.367	0.138	3.2744e-06	S3T2	Cobll1
1.21785e-10	0.266698	0.292	0.102	3.40973e-06	S3T2	Gm15638
1.29718e-10	0.462247	0.325	0.121	3.63185e-06	S3T2	Saa1
1.47849e-10	0.255061	0.333	0.121	4.13946e-06	S3T2	Gfer
1.52429e-10	0.300923	0.492	0.211	4.26772e-06	S3T2	Abhd14b
1.7551e-10	0.259103	0.45	0.188	4.91392e-06	S3T2	Nap1l1
1.76129e-10	0.373494	0.825	0.569	4.93126e-06	S3T2	Lamp1
1.87043e-10	0.408449	0.725	0.442	5.23682e-06	S3T2	Atp6v1a
2.10588e-10	0.2545	0.333	0.122	5.89606e-06	S3T2	Prosc
2.15273e-10	0.287981	0.333	0.125	6.02721e-06	S3T2	Nadk
2.31043e-10	0.393029	0.65	0.323	6.46873e-06	S3T2	Folr1
2.99518e-10	0.313668	0.367	0.146	8.3859e-06	S3T2	Pole4
2.99846e-10	0.289596	0.658	0.327	8.39508e-06	S3T2	Cldn2
4.04228e-10	0.253613	0.383	0.15	1.13176e-05	S3T2	Haao
4.41291e-10	0.409207	0.808	0.501	1.23553e-05	S3T2	Med28
4.82147e-10	0.335046	0.575	0.274	1.34991e-05	S3T2	Tm9sf3
4.84851e-10	0.366732	0.767	0.417	1.35749e-05	S3T2	Slc17a1
4.92937e-10	0.415905	0.892	0.586	1.38013e-05	S3T2	Hist1h2bc
4.98445e-10	0.30697	0.558	0.26	1.39555e-05	S3T2	Rnf181
5.87724e-10	0.2576	0.333	0.125	1.64551e-05	S3T2	Usp2
7.23925e-10	0.309829	0.375	0.152	2.02685e-05	S3T2	Eci3
8.38912e-10	0.300206	0.417	0.174	2.34879e-05	S3T2	Cdhr5
9.09463e-10	0.395341	0.575	0.299	2.54631e-05	S3T2	Atp2a2
9.17053e-10	0.371362	0.742	0.404	2.56756e-05	S3T2	Galnt11
9.49707e-10	0.295377	0.567	0.274	2.65899e-05	S3T2	Tm9sf2
1.00896e-09	0.276591	0.992	0.918	2.8249e-05	S3T2	Rps19
1.16405e-09	0.356415	0.783	0.461	3.2591e-05	S3T2	Sephs2
1.26978e-09	0.350956	0.65	0.34	3.55513e-05	S3T2	Emc6
1.44298e-09	0.263665	0.45	0.197	4.04006e-05	S3T2	Nfia
1.55672e-09	0.405805	0.558	0.275	4.35851e-05	S3T2	Cisd3
1.65819e-09	0.253018	0.3	0.111	4.6426e-05	S3T2	Hook1
1.90204e-09	0.355901	0.667	0.343	5.32534e-05	S3T2	Bphl
1.94959e-09	0.351829	0.817	0.489	5.45847e-05	S3T2	Keg1
1.95186e-09	0.323412	0.492	0.224	5.46481e-05	S3T2	Neu1
2.32791e-09	0.299503	0.583	0.294	6.51769e-05	S3T2	Chuk
2.34886e-09	0.263725	0.367	0.15	6.57635e-05	S3T2	Acyp2
2.65978e-09	0.27133	0.367	0.149	7.44686e-05	S3T2	Golga4
2.97e-09	0.299354	0.525	0.249	8.31541e-05	S3T2	Ces1f
3.29644e-09	0.289417	0.483	0.221	9.22937e-05	S3T2	Prr15l
3.38196e-09	0.381857	0.925	0.693	9.46882e-05	S3T2	Arpp19
3.7357e-09	0.342678	0.558	0.283	0.000104592	S3T2	Fuca1
4.24032e-09	0.30484	0.492	0.236	0.00011872	S3T2	Tmem33
4.3613e-09	0.268781	0.425	0.184	0.000122108	S3T2	Ugp2
4.42597e-09	0.312779	0.742	0.414	0.000123918	S3T2	1810037I17Rik
5.22859e-09	0.320988	0.617	0.326	0.00014639	S3T2	Selt
5.89507e-09	0.335562	0.742	0.436	0.00016505	S3T2	Canx
6.27495e-09	0.321562	0.5	0.236	0.000175686	S3T2	Adhfe1
6.54227e-09	0.33963	0.783	0.457	0.000183171	S3T2	Vdac1
7.29125e-09	0.260731	0.3	0.114	0.00020414	S3T2	Smlr1
7.75023e-09	0.315959	0.408	0.18	0.000216991	S3T2	Hnf4a
8.90987e-09	0.375626	0.633	0.372	0.000249459	S3T2	Nus1
1.06404e-08	0.341615	0.65	0.354	0.000297909	S3T2	C1d
1.21517e-08	0.337888	0.575	0.302	0.000340223	S3T2	Igf1r
1.28825e-08	0.273204	0.792	0.448	0.000360685	S3T2	RP24-64C6.3
1.53009e-08	0.259552	0.383	0.166	0.000428395	S3T2	Ndfip2
1.68458e-08	0.269441	0.258	0.096	0.000471649	S3T2	Edem1
1.90134e-08	0.339748	0.85	0.592	0.000532338	S3T2	Timm13
2.38207e-08	0.322492	0.692	0.397	0.000666933	S3T2	Tns1
2.50246e-08	0.289003	0.55	0.277	0.000700638	S3T2	Ddah1
2.56451e-08	0.362123	0.417	0.199	0.000718011	S3T2	Mettl7a1
2.66086e-08	0.279057	0.417	0.187	0.000744988	S3T2	Mtss1
3.21543e-08	0.345028	0.383	0.181	0.000900257	S3T2	Rora
3.38885e-08	0.261517	0.425	0.196	0.000948809	S3T2	Pkd2
3.46435e-08	0.258225	0.375	0.165	0.000969947	S3T2	Susd6
3.81003e-08	0.270738	0.942	0.871	0.00106673	S3T2	mt-Nd5
3.9039e-08	0.28322	0.967	0.809	0.00109302	S3T2	Ndufa1
4.76444e-08	0.299527	0.433	0.204	0.00133395	S3T2	Col4a3
5.09641e-08	0.319322	0.758	0.448	0.00142689	S3T2	Rbm47
5.46996e-08	0.278359	0.3	0.121	0.00153148	S3T2	Slc25a25
5.93833e-08	0.264917	0.667	0.376	0.00166261	S3T2	Fut9
1.30435e-07	0.255785	0.583	0.322	0.00365193	S3T2	Abcd3
1.50447e-07	0.375984	0.875	0.656	0.00421223	S3T2	Sdc4
2.08954e-07	0.293606	0.508	0.262	0.0058503	S3T2	2310039H08Rik
2.30056e-07	0.271697	0.35	0.157	0.0064411	S3T2	Por
2.47924e-07	0.385173	0.767	0.575	0.00694139	S3T2	Zbtb20
2.59896e-07	0.271913	0.558	0.296	0.00727658	S3T2	Tm2d1
2.90357e-07	0.257642	0.3	0.126	0.00812941	S3T2	Mpp6
3.06214e-07	0.261559	0.425	0.206	0.00857339	S3T2	Pam16
3.28683e-07	0.286703	0.542	0.295	0.00920247	S3T2	Myo6
3.70379e-07	0.257233	0.383	0.18	0.0103699	S3T2	Pxmp4
3.87269e-07	0.287369	0.375	0.179	0.0108428	S3T2	Aco1
5.02224e-07	0.300296	0.65	0.366	0.0140613	S3T2	Snhg18
6.19822e-07	0.271686	0.367	0.17	0.0173538	S3T2	Tm2d2
6.19974e-07	0.256346	0.533	0.286	0.017358	S3T2	Serinc1
7.50438e-07	0.270934	0.908	0.643	0.0210108	S3T2	Pck1
8.60884e-07	0.29108	0.908	0.658	0.024103	S3T2	Ndufs6
1.14398e-06	0.336488	0.925	0.729	0.0320292	S3T2	Ndufb8
1.29522e-06	0.273446	0.283	0.127	0.0362635	S3T2	Erp29
1.35262e-06	0.266943	0.375	0.187	0.0378705	S3T2	Rnf187
1.39868e-06	0.277318	0.5	0.282	0.0391601	S3T2	Rnf11
1.42895e-06	0.312889	0.55	0.316	0.0400078	S3T2	Iah1
4.0192e-06	0.289192	0.633	0.383	0.11253	S3T2	Mien1
4.1094e-06	0.322784	0.592	0.377	0.115055	S3T2	Ech1
4.24145e-06	0.2852	0.275	0.127	0.118752	S3T2	Trim7
7.18692e-06	0.256328	0.275	0.127	0.201219	S3T2	Stard7
4.09408e-05	0.254199	0.508	0.295	1	S3T2	Prelid1
0.000158485	0.255121	0.467	0.282	1	S3T2	Fah
0	3.42992	0.984	0.125	0	LOH	Slc12a1
0	3.15269	0.982	0.272	0	LOH	Umod
0	2.87423	0.933	0.196	0	LOH	Egf
0	2.72121	0.921	0.15	0	LOH	Wfdc15b
0	1.97864	0.836	0.088	0	LOH	Ppp1r1a
0	1.53579	0.758	0.128	0	LOH	Kng2
0	1.33955	0.533	0.044	0	LOH	Ctsc
0	1.14267	0.392	0.021	0	LOH	Hesx1
6.6651e-305	1.96234	0.986	0.365	1.86609e-300	LOH	Defb1
2.41552e-277	1.3895	0.501	0.059	6.76298e-273	LOH	Slc5a3
4.1571e-265	1.33143	0.778	0.17	1.16391e-260	LOH	Cd24a
1.44611e-259	2.06212	1	0.832	4.04882e-255	LOH	Mt1
1.52187e-238	0.943055	0.301	0.019	4.26093e-234	LOH	Gpx6
3.04089e-232	1.03596	0.364	0.033	8.51388e-228	LOH	Apela
9.8692e-226	1.19193	0.562	0.093	2.76318e-221	LOH	Epcam
3.26051e-222	1.34445	0.992	0.577	9.12879e-218	LOH	Mt2
6.18053e-215	1.07314	0.869	0.298	1.73043e-210	LOH	Lcn2
1.56078e-212	1.3049	0.584	0.116	4.36988e-208	LOH	Mrps6
3.65134e-206	1.55982	0.996	0.893	1.0223e-201	LOH	Spp1
3.75819e-185	1.0383	0.37	0.047	1.05222e-180	LOH	Slc5a1
1.31391e-184	0.92882	0.364	0.043	3.67869e-180	LOH	Ckb
8.64044e-180	0.932146	0.329	0.036	2.41915e-175	LOH	Slc1a5
2.561e-175	1.06196	0.394	0.057	7.1703e-171	LOH	Mfsd7b
1.70723e-170	0.937117	0.303	0.032	4.77991e-166	LOH	Sdc1
7.56739e-170	1.15991	0.271	0.025	2.11872e-165	LOH	Col5a2
3.47478e-168	1.1959	0.44	0.075	9.72868e-164	LOH	Kctd1
3.98281e-167	1.18197	0.596	0.141	1.11511e-162	LOH	Wfdc2
7.47647e-166	0.996281	0.982	0.657	2.09326e-161	LOH	Ly6a
1.73587e-161	0.903755	0.356	0.049	4.8601e-157	LOH	Mfsd4
4.54967e-158	1.05054	0.956	0.664	1.27382e-153	LOH	Atp1a1
9.5761e-154	0.925159	0.976	0.767	2.68112e-149	LOH	Atp1b1
2.06657e-140	1.14204	0.842	0.444	5.78598e-136	LOH	Calm2
2.7664e-139	0.922499	0.364	0.061	7.74537e-135	LOH	Muc1
2.65781e-138	0.925301	0.459	0.095	7.44135e-134	LOH	Mal
2.47848e-134	0.871907	0.321	0.047	6.93924e-130	LOH	Tmem72
5.81389e-132	1.23687	0.844	0.501	1.62777e-127	LOH	Id2
9.86403e-128	0.861426	0.42	0.086	2.76173e-123	LOH	Tspan8
8.6063e-122	0.667303	0.253	0.032	2.40959e-117	LOH	Ocln
3.42405e-119	1.06833	0.511	0.148	9.58665e-115	LOH	Paqr5
6.50671e-111	0.839138	0.253	0.035	1.82175e-106	LOH	Sostdc1
2.7232e-109	0.80196	0.309	0.054	7.62441e-105	LOH	Kcnk1
2.0994e-106	0.647174	1	1	5.87791e-102	LOH	mt-Co1
1.72776e-104	0.787207	0.325	0.062	4.83738e-100	LOH	Kctd12
1.98967e-104	0.961386	0.798	0.465	5.57068e-100	LOH	Ivns1abp
1.95295e-102	0.724631	0.976	0.879	5.46787e-98	LOH	Tsc22d1
6.20152e-102	0.950915	0.731	0.359	1.7363e-97	LOH	Spint2
2.96006e-100	0.709569	0.261	0.042	8.28757e-96	LOH	Lamc2
5.89623e-93	0.647384	0.307	0.059	1.65083e-88	LOH	Abca13
5.32672e-89	0.715691	0.554	0.183	1.49138e-84	LOH	Tmem213
3.77152e-88	0.874697	0.77	0.417	1.05595e-83	LOH	Txnip
6.19086e-82	0.996666	0.566	0.243	1.73332e-77	LOH	Birc2
8.08113e-80	0.754663	0.313	0.073	2.26256e-75	LOH	St14
2.54421e-78	0.584476	0.263	0.052	7.12327e-74	LOH	Tspan12
2.59606e-78	0.450763	1	1	7.26846e-74	LOH	mt-Co3
4.06235e-78	0.691306	0.287	0.064	1.13738e-73	LOH	Laptm4b
1.01713e-76	0.764362	0.366	0.103	2.84776e-72	LOH	Spint1
2.69991e-74	0.841302	0.477	0.176	7.55921e-70	LOH	Itga6
8.0385e-74	0.320941	0.707	0.427	2.25062e-69	LOH	Klk1
1.47146e-73	0.993125	0.57	0.265	4.1198e-69	LOH	Itgav
6.76277e-72	0.70916	0.263	0.058	1.89344e-67	LOH	Eif4ebp1
3.60869e-69	0.660505	0.442	0.146	1.01036e-64	LOH	Pkm
8.35481e-69	0.592648	0.305	0.075	2.33918e-64	LOH	Kcnj1
2.50012e-67	0.444888	0.998	0.998	6.99985e-63	LOH	mt-Co2
1.40133e-63	0.663615	0.446	0.161	3.92345e-59	LOH	Cdh1
2.23448e-63	0.406195	1	0.999	6.25611e-59	LOH	mt-Cytb
4.26134e-58	0.690126	0.38	0.133	1.19309e-53	LOH	Anxa5
3.99187e-57	0.647258	0.271	0.072	1.11764e-52	LOH	Clcnkb
1.10233e-56	0.677286	0.39	0.144	3.08631e-52	LOH	Elovl7
4.62639e-56	0.6555	0.309	0.094	1.2953e-51	LOH	Tmem123
1.52112e-55	0.384644	1	1	4.25884e-51	LOH	mt-Atp6
6.11476e-55	0.72637	0.321	0.104	1.71201e-50	LOH	Usp53
7.34619e-54	0.601372	0.273	0.077	2.05679e-49	LOH	Cd82
8.00224e-53	0.594881	0.333	0.108	2.24047e-48	LOH	Aif1l
8.76354e-51	0.36068	1	0.995	2.45362e-46	LOH	mt-Nd4
2.89017e-50	0.691285	0.457	0.206	8.0919e-46	LOH	Gcnt2
1.19477e-49	0.58152	0.277	0.085	3.34512e-45	LOH	Deptor
2.2007e-49	0.505195	0.929	0.848	6.16152e-45	LOH	mt-Nd3
1.03753e-48	0.946794	0.384	0.151	2.90488e-44	LOH	Lgals3
1.37195e-48	0.581501	0.305	0.1	3.84119e-44	LOH	Cx3cl1
1.09418e-46	0.60181	0.578	0.316	3.06349e-42	LOH	Cdh16
3.74856e-46	0.606802	0.301	0.103	1.04952e-41	LOH	Dst
8.44704e-46	0.624497	0.329	0.121	2.365e-41	LOH	Acadsb
5.06845e-45	0.646417	0.584	0.329	1.41907e-40	LOH	Tnfsf10
1.34529e-42	0.524841	0.273	0.091	3.76655e-38	LOH	0610040J01Rik
1.43483e-41	0.561991	0.287	0.101	4.01724e-37	LOH	Nfe2l1
2.98648e-40	0.599987	0.313	0.12	8.36156e-36	LOH	Sorl1
2.56005e-39	0.610701	0.438	0.21	7.16764e-35	LOH	Etnk1
4.74991e-38	0.589493	0.457	0.231	1.32988e-33	LOH	Plscr1
5.13025e-36	0.559146	0.255	0.091	1.43637e-31	LOH	Cyfip2
1.25326e-35	0.590637	0.519	0.292	3.50888e-31	LOH	Tra2a
3.10014e-35	0.57202	0.414	0.209	8.67978e-31	LOH	Pkp4
5.92424e-34	0.486506	0.711	0.498	1.65867e-29	LOH	Gbp2
5.48096e-33	0.527086	0.43	0.214	1.53456e-28	LOH	Gbp3
8.87781e-32	0.621906	0.307	0.136	2.48561e-27	LOH	Itgb6
4.65842e-31	0.700836	0.434	0.242	1.30426e-26	LOH	Itgb8
5.12104e-31	0.583056	0.41	0.216	1.43379e-26	LOH	Gls
9.66842e-30	0.511228	0.368	0.172	2.70696e-25	LOH	Fabp3
1.43578e-28	0.518475	0.382	0.198	4.01989e-24	LOH	Jmjd1c
6.80594e-28	0.508354	0.394	0.206	1.90553e-23	LOH	Nudt4
1.44647e-27	0.392641	0.685	0.468	4.04983e-23	LOH	Cd47
1.70509e-27	0.411779	0.818	0.697	4.77391e-23	LOH	Atp5a1
5.01326e-27	0.684372	0.354	0.178	1.40361e-22	LOH	Mx1
1.25726e-26	0.524137	0.42	0.236	3.52008e-22	LOH	Syne2
1.34824e-26	0.421424	0.877	0.785	3.77481e-22	LOH	Cox7b
2.11344e-26	0.682283	0.388	0.222	5.91722e-22	LOH	Angptl4
2.57906e-26	0.347002	0.929	0.863	7.22085e-22	LOH	Cox5b
7.82151e-26	0.525237	0.325	0.159	2.18987e-21	LOH	Smagp
3.46577e-25	0.444449	0.568	0.389	9.70348e-21	LOH	Btg1
9.27487e-25	0.482865	0.307	0.151	2.59678e-20	LOH	Cgnl1
5.78692e-24	0.481093	0.358	0.192	1.62022e-19	LOH	1700011H14Rik
7.70418e-24	0.507797	0.319	0.16	2.15702e-19	LOH	Slc38a2
6.59933e-23	0.647045	0.327	0.175	1.84768e-18	LOH	H1f0
1.7019e-22	0.534032	0.358	0.201	4.76498e-18	LOH	Birc3
2.87853e-22	0.537812	0.475	0.323	8.05932e-18	LOH	Camk2n1
9.67148e-22	0.445867	0.311	0.155	2.70782e-17	LOH	Socs2
1.23086e-21	0.443288	0.356	0.196	3.44615e-17	LOH	Crim1
1.41934e-20	0.4287	0.283	0.143	3.97388e-16	LOH	Ptprf
1.73069e-20	0.42653	0.277	0.139	4.8456e-16	LOH	Net1
9.89262e-20	0.415774	0.347	0.193	2.76974e-15	LOH	Rbms1
1.10209e-19	0.486426	0.309	0.168	3.08563e-15	LOH	Nrp1
2.07211e-19	0.268364	0.931	0.868	5.8015e-15	LOH	mt-Nd5
1.21325e-18	0.489875	0.453	0.309	3.39686e-14	LOH	Mgst3
2.03651e-18	0.271324	0.937	0.856	5.70181e-14	LOH	Atp5g1
5.24204e-18	0.361438	0.56	0.406	1.46767e-13	LOH	Cd81
1.13794e-17	0.38365	0.313	0.168	3.18599e-13	LOH	Gbp5
1.24971e-17	0.456267	0.374	0.234	3.49893e-13	LOH	Msi2
2.11233e-17	0.47483	0.436	0.298	5.91411e-13	LOH	Igf1r
1.51933e-16	0.401352	0.531	0.397	4.25383e-12	LOH	Bag1
1.76256e-16	0.53935	0.451	0.329	4.93481e-12	LOH	Cldn10
3.8467e-16	0.390789	0.384	0.24	1.077e-11	LOH	Cxcl16
5.92657e-16	0.364455	0.317	0.176	1.65932e-11	LOH	Cd9
1.07492e-15	0.394225	0.329	0.197	3.00955e-11	LOH	Irf2bpl
1.12037e-15	0.350635	0.313	0.178	3.13682e-11	LOH	Tap2
1.28014e-15	0.308259	0.297	0.162	3.58414e-11	LOH	Enpp4
4.75401e-15	0.448715	0.329	0.205	1.33103e-10	LOH	Reep3
5.78583e-15	0.258674	0.911	0.859	1.61992e-10	LOH	Uqcrh
1.74635e-14	0.33946	0.661	0.546	4.88944e-10	LOH	Aldoa
2.10294e-14	0.372322	0.289	0.167	5.8878e-10	LOH	Lima1
5.85592e-14	0.297589	0.345	0.207	1.63954e-09	LOH	Oasl2
6.99769e-14	0.371135	0.283	0.166	1.95921e-09	LOH	Il6st
1.31196e-13	0.266542	0.869	0.786	3.67322e-09	LOH	Atp5g3
2.94188e-13	0.403905	0.349	0.235	8.23668e-09	LOH	Erbb2ip
3.01856e-13	0.297182	0.758	0.646	8.45137e-09	LOH	Zfp36l1
4.81076e-13	0.310394	0.661	0.555	1.34692e-08	LOH	Rsrp1
7.73759e-13	0.374817	0.515	0.405	2.16637e-08	LOH	1110001J03Rik
2.12294e-12	0.342571	0.279	0.171	5.94382e-08	LOH	Cdhr5
2.41581e-12	0.342274	0.392	0.267	6.76379e-08	LOH	Trim12a
3.32047e-12	0.310178	0.311	0.192	9.29666e-08	LOH	Nfe2l2
3.96911e-12	0.348237	0.4	0.285	1.11127e-07	LOH	Clk1
4.08546e-12	0.48611	0.436	0.328	1.14385e-07	LOH	Gclc
4.67243e-12	0.315007	0.366	0.245	1.30819e-07	LOH	Camk2d
4.77514e-12	0.322836	0.768	0.682	1.33694e-07	LOH	Ldhb
7.05988e-12	0.300243	0.422	0.305	1.97662e-07	LOH	Sgms2
8.61476e-12	0.303688	0.414	0.293	2.41196e-07	LOH	Fus
1.08297e-11	0.401551	0.436	0.327	3.03209e-07	LOH	Idh2
1.60178e-11	0.296249	0.651	0.567	4.48466e-07	LOH	App
1.84812e-11	0.342594	0.299	0.192	5.17436e-07	LOH	Hadhb
2.0536e-11	0.33023	0.408	0.292	5.74967e-07	LOH	Ctsd
5.06586e-11	0.361459	0.267	0.168	1.41834e-06	LOH	Cd2ap
8.07752e-11	0.345756	0.376	0.267	2.26154e-06	LOH	Mgst1
1.7259e-10	0.28991	0.291	0.186	4.83219e-06	LOH	Pdk4
1.92343e-10	0.321886	0.275	0.174	5.38523e-06	LOH	Vwa5a
3.32236e-10	0.297558	0.35	0.243	9.30193e-06	LOH	Ank3
8.51275e-10	0.385105	0.313	0.217	2.3834e-05	LOH	Ogt
8.82908e-10	0.374798	0.289	0.196	2.47197e-05	LOH	Acadl
3.27399e-09	0.299844	0.311	0.215	9.16651e-05	LOH	Rnf128
4.13824e-09	0.27035	0.61	0.527	0.000115862	LOH	Oxct1
5.11996e-09	0.307919	0.408	0.31	0.000143349	LOH	Stat3
1.24799e-08	0.309646	0.295	0.205	0.000349411	LOH	Hcfc1r1
1.42129e-08	0.313739	0.313	0.222	0.000397932	LOH	Mbnl2
2.07657e-08	0.313297	0.323	0.233	0.000581399	LOH	Wls
2.43611e-08	0.274498	0.267	0.175	0.000682063	LOH	Tlr3
6.03925e-08	0.311888	0.384	0.297	0.00169087	LOH	Rabac1
6.71589e-08	0.27203	0.265	0.178	0.00188032	LOH	Parp12
1.00127e-07	0.272744	0.299	0.211	0.00280336	LOH	Slc39a1
1.01183e-07	0.300361	0.335	0.247	0.00283291	LOH	Ywhah
1.93497e-07	0.272649	0.275	0.193	0.00541753	LOH	Aftph
8.36548e-07	0.276925	0.479	0.408	0.0234217	LOH	Kcnj16
1.43454e-06	0.315129	0.372	0.304	0.0401641	LOH	Bhlhe40
4.93975e-05	0.255953	0.36	0.303	1	LOH	Gadd45a
6.29855e-05	0.265686	0.45	0.406	1	LOH	Gabarapl1
0.000165035	0.276697	0.319	0.271	1	LOH	Guk1
0	1.36374	0.561	0.02	0	CNT	Trpv5
9.02697e-300	2.16275	0.959	0.097	2.52737e-295	CNT	Tmem52b
1.21496e-290	1.50813	0.713	0.048	3.40164e-286	CNT	Ptges
1.17436e-243	1.22447	0.491	0.025	3.28797e-239	CNT	Scnn1g
1.17426e-239	1.21151	0.404	0.016	3.2877e-235	CNT	Ltc4s
9.99489e-237	1.5248	0.749	0.066	2.79837e-232	CNT	Pgam2
2.89585e-221	1.16329	0.55	0.036	8.10781e-217	CNT	Scnn1b
4.30305e-213	2.87278	0.865	0.117	1.20477e-208	CNT	Calb1
2.33058e-191	1.08887	0.433	0.025	6.52515e-187	CNT	Rhbg
1.30509e-190	0.75154	0.304	0.011	3.65399e-186	CNT	AI838599
2.71428e-184	1.20192	0.626	0.058	7.59944e-180	CNT	Scd2
7.06527e-180	1.02649	0.532	0.042	1.97813e-175	CNT	Tspan1
1.52302e-174	0.844406	0.363	0.019	4.26416e-170	CNT	Emx1
1.21264e-171	1.61606	0.55	0.047	3.39514e-167	CNT	Hsd11b2
2.98264e-168	1.69269	0.901	0.154	8.35078e-164	CNT	Wfdc2
2.2057e-162	0.981116	0.462	0.035	6.17551e-158	CNT	Rhcg
4.61463e-162	1.3282	0.667	0.077	1.292e-157	CNT	Kcnj1
7.76176e-156	2.20015	0.994	0.256	2.17314e-151	CNT	Clu
1.09348e-153	1.06893	0.503	0.044	3.06153e-149	CNT	Cav2
5.18001e-152	0.947319	0.497	0.044	1.4503e-147	CNT	Ermp1
3.636e-149	1.30036	0.731	0.103	1.01801e-144	CNT	Hoxd8
2.71058e-128	1.40689	0.906	0.19	7.58909e-124	CNT	Tmem213
6.43193e-126	0.955731	0.444	0.042	1.80081e-121	CNT	Cldn8
7.79457e-122	1.05538	0.579	0.074	2.18232e-117	CNT	Clcnkb
3.18468e-119	3.44934	0.982	0.432	8.91648e-115	CNT	Klk1
2.3364e-118	0.917191	0.491	0.055	6.54144e-114	CNT	Scnn1a
1.03604e-116	3.57583	1	0.536	2.90072e-112	CNT	S100g
7.56367e-116	1.10966	0.673	0.106	2.11768e-111	CNT	Mal
4.42944e-113	1.28446	0.789	0.153	1.24015e-108	CNT	Kng2
1.02194e-103	0.892821	0.404	0.041	2.86123e-99	CNT	Sostdc1
5.09934e-101	0.620525	0.287	0.021	1.42771e-96	CNT	Megf9
8.04307e-94	0.844013	0.357	0.037	2.2519e-89	CNT	Hoxd9
2.39415e-93	1.17884	0.684	0.138	6.70315e-89	CNT	Pycard
4.06906e-91	0.549232	0.251	0.018	1.13926e-86	CNT	Atp2b4
1.04056e-88	0.985774	0.614	0.112	2.91337e-84	CNT	Aif1l
1.18282e-87	1.52253	0.778	0.217	3.31167e-83	CNT	Wnk1
1.41581e-84	0.70969	0.275	0.024	3.96397e-80	CNT	Kcnq1
9.356e-82	1.18292	1	0.775	2.61949e-77	CNT	Atp1b1
2.02024e-81	1.33556	0.994	0.676	5.65626e-77	CNT	Atp1a1
2.20636e-80	1.76583	0.871	0.377	6.17738e-76	CNT	Kl
1.68279e-79	0.588359	0.251	0.021	4.71149e-75	CNT	Rap1gap
8.92769e-79	0.667584	0.351	0.041	2.49958e-74	CNT	Hoxb5os
5.32432e-78	0.901234	0.456	0.073	1.4907e-73	CNT	Tmem178
1.39355e-75	1.13983	0.965	0.391	3.90167e-71	CNT	Defb1
2.91824e-73	0.848985	0.316	0.036	8.17048e-69	CNT	Sfrp1
1.17699e-72	0.805618	0.444	0.07	3.29534e-68	CNT	Mfsd7b
1.57474e-71	0.609162	0.275	0.028	4.40896e-67	CNT	A4galt
4.66529e-71	1.40295	0.813	0.302	1.30619e-66	CNT	Sgms2
2.04665e-70	0.934625	0.684	0.167	5.73021e-66	CNT	Cdh1
3.35027e-70	0.858661	0.526	0.099	9.3801e-66	CNT	Tacstd2
7.13851e-70	0.703189	0.357	0.047	1.99864e-65	CNT	Efhd1
2.73283e-69	0.787094	0.439	0.071	7.65137e-65	CNT	Npnt
5.51269e-68	0.719966	0.357	0.049	1.54344e-63	CNT	Ildr1
1.54728e-67	0.690173	0.298	0.035	4.33208e-63	CNT	Slit2
1.01836e-65	1.06617	0.854	0.321	2.8512e-61	CNT	Cdh16
4.39155e-65	1.0003	1	0.898	1.22955e-60	CNT	Spp1
1.73761e-63	0.662776	0.38	0.058	4.86495e-59	CNT	Slc16a7
3.56127e-63	0.833839	0.409	0.067	9.97085e-59	CNT	Abca13
1.45459e-62	1.09022	0.795	0.289	4.07256e-58	CNT	Ctsd
1.92924e-62	0.814159	1	1	5.40147e-58	CNT	mt-Co1
9.57722e-60	0.707544	0.357	0.055	2.68143e-55	CNT	F2rl1
6.58979e-59	0.659863	0.316	0.044	1.84501e-54	CNT	Pcolce
1.38359e-58	1.04323	0.93	0.476	3.87377e-54	CNT	Ivns1abp
3.74488e-58	0.562139	0.251	0.029	1.04849e-53	CNT	Tspan15
5.37954e-58	1.01535	0.713	0.229	1.50616e-53	CNT	Wls
3.17412e-57	0.844082	0.608	0.156	8.88691e-53	CNT	Lgals3
1.18292e-56	0.758072	0.661	0.174	3.31194e-52	CNT	Cd9
2.4572e-53	0.845999	0.439	0.094	6.87965e-49	CNT	Tmprss2
6.95189e-53	0.566957	0.269	0.035	1.94639e-48	CNT	Ckmt1
2.34915e-52	0.590376	1	1	6.57716e-48	CNT	mt-Co3
4.88042e-52	0.653326	0.351	0.059	1.36642e-47	CNT	Tspan12
1.41007e-51	1.04827	0.637	0.209	3.94791e-47	CNT	Nudt4
2.10224e-51	0.640773	0.368	0.064	5.88584e-47	CNT	Rasd1
1.00478e-50	0.688446	0.427	0.087	2.81319e-46	CNT	Tanc1
3.03908e-50	0.602301	0.357	0.061	8.50883e-46	CNT	Mfsd4
3.06933e-50	0.58552	0.327	0.054	8.59352e-46	CNT	Fzd4
1.93526e-49	0.72324	0.456	0.099	5.41834e-45	CNT	Tspan8
1.43254e-48	0.731409	0.982	0.864	4.01082e-44	CNT	Itm2b
1.58891e-48	0.59265	1	0.998	4.44863e-44	CNT	mt-Co2
4.32356e-48	0.596161	0.298	0.047	1.21051e-43	CNT	Mecom
6.60865e-48	0.532365	0.287	0.043	1.85029e-43	CNT	Sgpp2
1.46422e-46	0.714006	0.427	0.095	4.09953e-42	CNT	Piezo1
2.50178e-46	0.60733	0.327	0.057	7.00449e-42	CNT	Krt7
4.08374e-46	0.519554	1	1	1.14337e-41	CNT	mt-Cytb
5.85909e-46	0.505704	0.263	0.039	1.64043e-41	CNT	Iqgap2
9.43811e-46	0.707155	0.982	0.67	2.64248e-41	CNT	Ly6a
3.82001e-43	0.593795	0.649	0.198	1.06953e-38	CNT	Cd24a
6.19417e-43	0.856363	0.819	0.403	1.73424e-38	CNT	Ezr
6.9154e-43	0.858426	0.468	0.122	1.93617e-38	CNT	Wsb1
2.45109e-42	0.71868	0.439	0.105	6.86257e-38	CNT	Nfe2l1
4.8562e-42	0.509032	1	1	1.35964e-37	CNT	mt-Atp6
7.28297e-42	0.528994	0.327	0.062	2.03909e-37	CNT	Prps2
1.20262e-41	0.609647	0.561	0.156	3.36711e-37	CNT	Pkm
1.22931e-41	0.782745	0.556	0.163	3.44182e-37	CNT	Enpp4
1.54182e-41	0.777796	0.69	0.25	4.3168e-37	CNT	Sh3bgrl3
1.57547e-40	0.506086	0.287	0.05	4.41099e-36	CNT	Tbx2
4.53315e-40	0.688248	0.474	0.127	1.26919e-35	CNT	Acadsb
5.39839e-40	0.819537	0.871	0.489	1.51144e-35	CNT	Serinc3
1.05689e-39	0.553499	0.281	0.049	2.95908e-35	CNT	Itgb5
7.76184e-39	0.695388	0.351	0.076	2.17316e-34	CNT	Wnk4
1.53057e-38	0.670418	0.392	0.091	4.28528e-34	CNT	Kctd1
6.27531e-37	0.782381	0.912	0.628	1.75696e-32	CNT	S100a1
9.44983e-36	0.527446	0.263	0.048	2.64576e-31	CNT	Serpinb1a
6.42193e-35	0.642116	0.415	0.111	1.79801e-30	CNT	Usp53
1.35985e-34	0.584952	0.994	0.85	3.8073e-30	CNT	mt-Nd3
2.45017e-34	0.523399	0.327	0.072	6.85998e-30	CNT	Laptm4b
9.4504e-34	0.46961	0.251	0.046	2.64592e-29	CNT	Tmem65
1.13278e-33	0.771817	0.509	0.174	3.17155e-29	CNT	Clint1
1.64416e-33	0.465805	0.292	0.059	4.60331e-29	CNT	Tmem72
5.22863e-33	0.596866	0.292	0.063	1.46391e-28	CNT	Ntn4
6.33908e-33	0.600188	0.31	0.069	1.77482e-28	CNT	Aqp2
1.12551e-32	0.536954	0.263	0.052	3.15121e-28	CNT	Clstn1
3.20629e-32	0.699037	0.731	0.326	8.97696e-28	CNT	Gclc
4.36421e-32	0.634178	0.544	0.187	1.22189e-27	CNT	Itga6
4.57391e-32	0.603453	0.333	0.081	1.2806e-27	CNT	Trim2
9.35761e-32	0.575935	0.298	0.066	2.61994e-27	CNT	Pbxip1
1.8478e-31	0.623449	0.38	0.104	5.17348e-27	CNT	Enpp5
1.98895e-31	0.670592	0.69	0.3	5.56867e-27	CNT	Aplp2
3.33276e-31	1.3091	0.409	0.126	9.33107e-27	CNT	Slc12a3
1.40806e-29	0.638292	0.579	0.225	3.94228e-25	CNT	Ptp4a2
2.31115e-29	0.666169	0.784	0.404	6.47075e-25	CNT	Kcnj16
1.23981e-28	0.681146	0.456	0.156	3.47121e-24	CNT	Wwc1
1.38162e-28	0.446247	0.333	0.082	3.86825e-24	CNT	Cldn7
2.95949e-28	0.576345	0.327	0.086	8.28599e-24	CNT	Tgfbr1
3.24847e-28	0.384116	1	0.995	9.09507e-24	CNT	mt-Nd4
4.95773e-28	0.581676	0.345	0.094	1.38806e-23	CNT	Tsc22d2
5.33036e-28	0.610572	0.55	0.208	1.49239e-23	CNT	Ctnna1
3.65788e-27	0.816128	0.497	0.182	1.02413e-22	CNT	Mx1
8.42264e-27	0.703724	0.784	0.439	2.35817e-22	CNT	Atp6v1a
1.94993e-26	0.427593	0.257	0.058	5.45941e-22	CNT	Acsl5
5.91102e-26	0.664699	0.503	0.192	1.65497e-21	CNT	Tfcp2l1
6.73415e-26	0.532776	0.316	0.083	1.88543e-21	CNT	St14
8.76526e-26	0.41632	0.421	0.128	2.4541e-21	CNT	Ppp1r1a
1.20176e-24	0.455028	0.263	0.064	3.36469e-20	CNT	Rragd
5.13455e-24	0.470488	0.398	0.127	1.43757e-19	CNT	Acss1
6.63799e-24	0.406958	0.287	0.074	1.8585e-19	CNT	Pls3
1.19989e-23	0.552023	0.327	0.097	3.35946e-19	CNT	Cbx5
1.69615e-23	0.587119	0.462	0.171	4.74889e-19	CNT	Hes1
2.0986e-23	0.54211	0.363	0.114	5.87566e-19	CNT	Fermt2
2.60717e-23	0.386449	1	0.963	7.29955e-19	CNT	mt-Nd2
3.97025e-23	0.338484	1	1	1.11159e-18	CNT	mt-Nd1
4.03391e-23	0.53912	0.339	0.104	1.12941e-18	CNT	Pdcd4
6.58768e-23	0.614917	0.526	0.222	1.84442e-18	CNT	Gls
6.69354e-23	0.510071	0.345	0.108	1.87406e-18	CNT	Cdo1
7.28699e-23	0.496406	0.351	0.108	2.04021e-18	CNT	Cx3cl1
2.1701e-22	0.440813	0.374	0.117	6.07585e-18	CNT	Epcam
2.54419e-22	0.475697	0.304	0.088	7.12323e-18	CNT	Ptprj
2.68176e-22	0.646936	0.515	0.215	7.50839e-18	CNT	Rnf128
2.87537e-22	0.547322	0.409	0.148	8.05046e-18	CNT	Bicc1
3.25598e-22	0.512571	0.316	0.095	9.1161e-18	CNT	Pkhd1
3.32627e-22	0.489409	0.281	0.078	9.31289e-18	CNT	Papss1
3.48603e-22	0.518956	0.269	0.072	9.76018e-18	CNT	Col18a1
2.15856e-21	0.506072	0.351	0.116	6.04354e-17	CNT	Hnrnpa0
3.18208e-21	0.551829	0.585	0.277	8.90919e-17	CNT	Itgav
3.43511e-21	0.541318	0.327	0.103	9.61762e-17	CNT	Flnb
5.4697e-21	0.476476	0.31	0.092	1.53141e-16	CNT	Adgrg1
5.97046e-21	0.433621	0.298	0.088	1.67161e-16	CNT	Gbas
8.22866e-21	0.446377	0.251	0.066	2.30386e-16	CNT	Tacc1
1.53898e-20	0.600438	0.743	0.472	4.30885e-16	CNT	Atp6v0e
2.53117e-20	0.568696	0.287	0.085	7.08678e-16	CNT	Pmepa1
3.18901e-20	0.567877	0.532	0.243	8.92858e-16	CNT	Col4a4
4.01089e-20	0.487115	0.345	0.115	1.12297e-15	CNT	Spint1
1.9511e-19	0.512774	0.503	0.215	5.46269e-15	CNT	Oat
2.24382e-19	0.492931	0.427	0.164	6.28224e-15	CNT	Atp6ap2
7.89042e-19	0.413586	0.345	0.115	2.20916e-14	CNT	Iqgap1
1.92839e-18	0.405139	0.825	0.507	5.39912e-14	CNT	Ly6e
5.57285e-18	0.350147	0.281	0.085	1.56029e-13	CNT	Cd82
8.06401e-18	0.468445	0.304	0.102	2.25776e-13	CNT	Tmem135
2.74846e-17	0.478829	0.281	0.092	7.69514e-13	CNT	Anxa11
4.61205e-17	0.440961	0.702	0.407	1.29128e-12	CNT	Cst3
6.32232e-17	0.447335	0.275	0.09	1.77012e-12	CNT	Pip4k2c
8.93245e-17	0.425668	0.409	0.164	2.50091e-12	CNT	Smagp
1.04652e-16	0.449869	0.497	0.229	2.93005e-12	CNT	Pgrmc1
2.84971e-16	0.549196	0.491	0.233	7.97863e-12	CNT	Morf4l2
4.5134e-16	0.361235	0.316	0.111	1.26366e-11	CNT	Dst
4.90331e-16	0.527741	0.497	0.241	1.37283e-11	CNT	Rtn3
8.72213e-16	0.470798	0.333	0.128	2.44202e-11	CNT	Sorl1
1.37653e-15	0.436983	0.257	0.085	3.85401e-11	CNT	Maged1
3.25072e-15	0.369049	0.269	0.09	9.10136e-11	CNT	Anxa4
4.54313e-15	0.449589	0.433	0.193	1.27198e-10	CNT	Hadhb
1.86662e-14	0.316963	0.281	0.097	5.22616e-10	CNT	Cyfip2
2.70917e-14	0.413625	0.667	0.377	7.58513e-10	CNT	Stat1
3.06833e-14	0.351057	0.281	0.1	8.5907e-10	CNT	Ndrg2
3.31971e-14	0.475057	0.351	0.148	9.29452e-10	CNT	Ptprf
6.87431e-14	0.520965	0.556	0.318	1.92467e-09	CNT	Map3k1
7.01911e-14	0.448282	0.48	0.237	1.96521e-09	CNT	Erbb2ip
7.37162e-14	0.454569	0.807	0.548	2.06391e-09	CNT	Aldoa
8.39462e-14	0.40248	0.573	0.31	2.35032e-09	CNT	Stat3
9.46963e-14	0.358191	0.462	0.218	2.65131e-09	CNT	Ogt
1.94161e-13	0.399684	0.889	0.701	5.43612e-09	CNT	Atp5a1
2.01589e-13	0.32883	0.386	0.166	5.6441e-09	CNT	Paqr5
2.04734e-13	0.564727	0.433	0.208	5.73214e-09	CNT	Ier3
4.30735e-13	0.440904	0.614	0.366	1.20597e-08	CNT	Tmem59
8.04964e-13	0.338069	0.959	0.851	2.25374e-08	CNT	mt-Nd4l
8.12635e-13	0.405012	0.269	0.101	2.27522e-08	CNT	Yap1
8.63365e-13	0.402589	0.357	0.155	2.41725e-08	CNT	Elovl7
8.77909e-13	0.460608	0.374	0.17	2.45797e-08	CNT	Ddr1
8.79457e-13	0.496957	0.333	0.146	2.4623e-08	CNT	Ddx6
3.23379e-12	0.474775	0.532	0.303	9.05397e-08	CNT	Ogdh
4.16942e-12	0.460767	0.55	0.32	1.16735e-07	CNT	Aes
4.72272e-12	0.423596	0.596	0.343	1.32227e-07	CNT	Znfx1
4.75658e-12	0.306296	0.977	0.87	1.33175e-07	CNT	mt-Nd5
7.73054e-12	0.398222	0.538	0.297	2.1644e-07	CNT	Rabac1
9.58596e-12	0.407706	0.789	0.551	2.68388e-07	CNT	Psap
9.84062e-12	0.452817	0.614	0.377	2.75518e-07	CNT	Aco2
1.62608e-11	0.265148	0.977	0.874	4.55269e-07	CNT	mt-Atp8
2.35666e-11	0.413549	0.661	0.426	6.59818e-07	CNT	Nampt
3.42189e-10	0.346739	0.596	0.36	9.5806e-06	CNT	Pdha1
4.09114e-10	0.373013	0.398	0.206	1.14544e-05	CNT	Copa
4.37785e-10	0.384952	0.491	0.286	1.22571e-05	CNT	Serinc1
4.74233e-10	0.305719	0.368	0.178	1.32776e-05	CNT	Gnpnat1
6.83282e-10	0.280858	0.257	0.107	1.91305e-05	CNT	Ypel5
7.08507e-10	0.380753	0.462	0.258	1.98368e-05	CNT	Ppib
8.08625e-10	0.32607	0.281	0.124	2.26399e-05	CNT	Nfat5
1.32227e-09	0.37371	0.304	0.141	3.70209e-05	CNT	Plxnb2
1.4184e-09	0.379669	0.48	0.274	3.97125e-05	CNT	Tm9sf2
1.49425e-09	0.315904	0.386	0.195	4.18359e-05	CNT	Nfe2l2
2.18145e-09	0.340245	0.532	0.316	6.10763e-05	CNT	Dazap2
3.6077e-09	0.289082	0.719	0.476	0.000101008	CNT	Cd47
3.88738e-09	0.299457	0.275	0.123	0.000108839	CNT	Stt3a
5.24456e-09	0.304193	0.257	0.113	0.000146837	CNT	Jade1
5.86177e-09	0.567402	0.561	0.386	0.000164118	CNT	Pth1r
6.17834e-09	0.335363	0.357	0.185	0.000172981	CNT	Tmed7
1.00913e-08	0.347279	0.316	0.157	0.000282535	CNT	Nbeal1
1.13094e-08	0.338963	0.415	0.231	0.000316642	CNT	Rad21
1.19067e-08	0.337824	0.31	0.155	0.000333363	CNT	Arf3
1.21829e-08	0.318146	0.45	0.255	0.000341098	CNT	Immt
1.4691e-08	0.275683	0.287	0.134	0.000411319	CNT	Emc10
1.56053e-08	0.2719	0.31	0.151	0.000436916	CNT	Trim56
1.72018e-08	0.308543	0.287	0.138	0.000481615	CNT	Cobll1
1.74724e-08	0.352783	0.468	0.272	0.000489192	CNT	Cpt1a
1.98786e-08	0.25873	0.281	0.129	0.00055656	CNT	Selm
2.3248e-08	0.288513	0.298	0.144	0.000650899	CNT	Amfr
3.52453e-08	0.29292	0.754	0.527	0.000986797	CNT	Bsg
3.53233e-08	0.298485	0.333	0.17	0.000988982	CNT	Il6st
3.72604e-08	0.280035	0.327	0.163	0.00104322	CNT	Mycbp2
4.00948e-08	0.337425	0.532	0.34	0.00112257	CNT	Pnp
4.69008e-08	0.33001	0.772	0.618	0.00131313	CNT	Atp6v1f
5.07525e-08	0.250721	0.439	0.245	0.00142097	CNT	F11r
6.57857e-08	0.276046	0.269	0.129	0.00184187	CNT	Impad1
1.04685e-07	0.28853	0.345	0.18	0.00293097	CNT	Parp12
1.10284e-07	0.283517	0.719	0.515	0.00308773	CNT	Rnf213
1.38116e-07	0.312151	0.485	0.296	0.00386698	CNT	Fus
2.09808e-07	0.284819	0.655	0.453	0.0058742	CNT	Sdha
8.39895e-07	0.2744	0.257	0.128	0.0235154	CNT	Atrx
8.67362e-07	0.323099	0.485	0.302	0.0242844	CNT	Tra2a
1.03878e-06	0.259003	0.374	0.21	0.0290839	CNT	Clcn3
1.11958e-06	0.254571	0.357	0.201	0.031346	CNT	Azin1
1.20456e-06	0.298404	0.415	0.254	0.0337252	CNT	Ptbp3
1.45193e-06	0.253498	0.374	0.217	0.0406512	CNT	Prkar1a
1.79617e-06	0.288782	0.509	0.333	0.0502892	CNT	Uqcc2
1.84031e-06	0.265118	0.345	0.2	0.0515249	CNT	Ube3a
2.34675e-06	0.273782	0.404	0.244	0.0657042	CNT	Syne2
4.14369e-06	0.258825	0.257	0.137	0.116015	CNT	Ddx39b
4.42114e-06	0.298875	0.275	0.149	0.123783	CNT	Idh3a
7.08504e-06	0.274377	0.398	0.249	0.198367	CNT	Ubl3
7.73268e-06	0.265598	0.269	0.147	0.2165	CNT	Crebrf
8.11722e-06	0.262411	0.351	0.207	0.227266	CNT	Sfpq
9.96776e-06	0.27847	0.275	0.15	0.279077	CNT	Helz2
1.11122e-05	0.279035	0.626	0.471	0.31112	CNT	Eif4a2
1.258e-05	0.251762	0.456	0.303	0.352215	CNT	Gadd45a
1.3081e-05	0.310072	0.374	0.24	0.366242	CNT	Pum2
1.4522e-05	0.268147	0.374	0.236	0.406588	CNT	Pura
2.45901e-05	0.252664	0.304	0.181	0.688473	CNT	Gstt1
3.71003e-05	0.257786	0.257	0.147	1	CNT	Tns3
0.000162172	0.282411	0.421	0.293	1	CNT	Irgm2
0.00181039	0.260588	0.363	0.266	1	CNT	Hnrnph1
0	2.92342	0.93	0.088	0	DCT	Slc12a3
0	1.74656	0.642	0.043	0	DCT	Abca13
0	1.61607	0.803	0.132	0	DCT	Kng2
0	1.57336	0.623	0.051	0	DCT	Pgam2
0	1.55465	0.492	0.024	0	DCT	Ptgfr
0	1.55023	0.731	0.101	0	DCT	Ppp1r1a
0	1.54537	0.679	0.084	0	DCT	Tmem52b
0	1.50472	0.403	0.008	0	DCT	Pvalb
4.00144e-306	1.74113	0.852	0.17	1.12032e-301	DCT	Tmem213
1.71935e-266	1.17651	0.459	0.043	4.81383e-262	DCT	Slc16a7
1.12602e-258	1.30731	0.536	0.064	3.15264e-254	DCT	Kcnj1
2.43415e-255	1.62939	0.89	0.237	6.81514e-251	DCT	Clu
6.14346e-250	1.8221	0.988	0.371	1.72005e-245	DCT	Defb1
8.80115e-235	1.52236	0.66	0.121	2.46414e-230	DCT	Pycard
4.58605e-225	1.53795	0.813	0.21	1.284e-220	DCT	Egf
2.21594e-218	0.819596	0.255	0.012	6.20419e-214	DCT	Trpm6
2.40161e-217	1.0499	0.337	0.026	6.72402e-213	DCT	Sfrp1
8.90584e-215	1.66714	0.981	0.666	2.49346e-210	DCT	Atp1a1
6.03867e-192	0.987355	0.4	0.046	1.69071e-187	DCT	Tmem72
4.8999e-187	1.38851	0.71	0.169	1.37187e-182	DCT	Wfdc15b
9.7184e-179	1.19604	0.382	0.045	2.72096e-174	DCT	Ckb
1.22399e-173	1.23543	0.628	0.139	3.42693e-169	DCT	Pkm
9.83599e-171	1.07197	0.429	0.062	2.75388e-166	DCT	Wnk4
1.22389e-170	1.47629	0.995	0.834	3.42666e-166	DCT	Mt1
8.79188e-170	1.00626	0.443	0.065	2.46155e-165	DCT	Clcnkb
5.54344e-167	1.98135	0.546	0.11	1.55205e-162	DCT	Calb1
2.30039e-164	0.929574	0.316	0.033	6.44064e-160	DCT	Hoxb5os
1.81371e-155	1.14807	0.625	0.144	5.07803e-151	DCT	Wfdc2
2.75811e-153	1.12184	0.496	0.095	7.72215e-149	DCT	Hoxd8
4.71881e-152	1.42046	0.677	0.204	1.32117e-147	DCT	Wnk1
1.61032e-148	1.37327	0.756	0.288	4.50857e-144	DCT	Sgms2
2.24659e-146	0.795749	0.283	0.029	6.28999e-142	DCT	Mgll
7.03258e-146	1.10376	0.792	0.289	1.96898e-141	DCT	Umod
1.6672e-144	0.921245	0.365	0.051	4.66781e-140	DCT	Mfsd4
1.0838e-139	1.01093	0.972	0.769	3.03443e-135	DCT	Atp1b1
3.53082e-131	0.845811	1	1	9.88558e-127	DCT	mt-Co1
1.92632e-129	0.74434	0.956	0.584	5.39332e-125	DCT	Mt2
2.20016e-126	0.951102	0.351	0.054	6.16e-122	DCT	Scd2
9.25287e-124	0.953959	0.468	0.099	2.59062e-119	DCT	Mal
1.51066e-122	0.907645	0.351	0.055	4.22955e-118	DCT	Rasd1
1.8865e-122	0.80922	0.33	0.049	5.28181e-118	DCT	Scnn1a
9.42274e-121	0.780173	0.984	0.66	2.63818e-116	DCT	Ly6a
2.61429e-119	0.794431	0.283	0.037	7.31948e-115	DCT	Pcolce
4.00517e-110	0.786896	0.295	0.044	1.12137e-105	DCT	Mmd
2.03321e-108	0.952241	0.494	0.126	5.69257e-104	DCT	Mrps6
4.67902e-98	1.01515	0.504	0.146	1.31003e-93	DCT	Socs2
2.99343e-96	1.6476	0.782	0.425	8.38101e-92	DCT	Klk1
1.83168e-95	0.736019	0.272	0.042	5.12834e-91	DCT	Efhd1
1.04435e-94	0.978659	0.527	0.159	2.92398e-90	DCT	Cdh1
4.87697e-94	0.903131	0.377	0.082	1.36546e-89	DCT	Kctd1
4.84811e-91	0.573805	0.998	0.958	1.35737e-86	DCT	Cox6c
4.16734e-90	0.847329	0.438	0.117	1.16677e-85	DCT	Acadsb
5.985e-89	0.73931	0.26	0.042	1.67568e-84	DCT	Ermp1
5.55806e-88	0.658838	0.977	0.86	1.55615e-83	DCT	Itm2b
1.73443e-87	0.70871	0.265	0.044	4.85604e-83	DCT	Ildr1
2.07014e-87	0.746053	0.344	0.072	5.79598e-83	DCT	Slc5a3
8.59563e-87	0.694371	0.255	0.041	2.40661e-82	DCT	Tspan1
4.60514e-86	0.768515	0.934	0.784	1.28935e-81	DCT	Atp5g3
9.31409e-86	0.52723	1	1	2.60776e-81	DCT	mt-Co3
1.53717e-85	0.634883	0.583	0.187	4.30378e-81	DCT	Cd24a
1.74729e-81	0.577395	0.986	0.906	4.89206e-77	DCT	Atp5e
3.07608e-81	0.859147	0.864	0.621	8.6124e-77	DCT	S100a1
2.44745e-77	0.959627	0.796	0.518	6.85236e-73	DCT	Oxct1
5.84845e-75	0.654894	0.279	0.056	1.63745e-70	DCT	Prps2
2.37972e-70	0.674961	0.321	0.075	6.66275e-66	DCT	St14
3.09226e-69	0.761522	0.89	0.694	8.65772e-65	DCT	Atp5a1
3.44443e-66	0.877235	0.365	0.106	9.64373e-62	DCT	Spint1
4.78361e-66	0.580346	0.995	0.894	1.33931e-61	DCT	Spp1
8.69801e-66	0.590122	0.965	0.872	2.43527e-61	DCT	Atp5k
1.87471e-65	0.651969	0.384	0.108	5.24882e-61	DCT	Epcam
6.55348e-63	0.655139	0.485	0.168	1.83484e-58	DCT	Cd9
1.27934e-61	0.833705	0.595	0.283	3.58189e-57	DCT	Ctsd
1.75141e-61	0.635685	0.283	0.066	4.90359e-57	DCT	Mfsd7b
2.98326e-60	0.601147	0.937	0.804	8.35252e-56	DCT	Ndufa1
1.65989e-59	0.778696	0.663	0.366	4.64735e-55	DCT	Spint2
5.81708e-59	0.465635	0.993	0.949	1.62867e-54	DCT	Cox4i1
1.39476e-58	0.568434	0.344	0.094	3.90505e-54	DCT	Tacstd2
2.26082e-58	0.549314	0.96	0.856	6.32985e-54	DCT	Atp5g1
1.72799e-56	0.570654	0.927	0.806	4.83803e-52	DCT	Atp5b
4.5272e-56	0.868476	0.667	0.395	1.26752e-51	DCT	Gabarapl1
1.04594e-55	0.776206	0.487	0.203	2.92843e-51	DCT	Nudt4
6.72966e-55	0.743492	0.672	0.398	1.88417e-50	DCT	Ezr
5.04205e-53	0.457	0.974	0.902	1.41167e-48	DCT	Uqcr11
5.65094e-53	0.435886	0.972	0.913	1.58215e-48	DCT	Cox7a2
1.79799e-51	0.638145	0.286	0.077	5.03401e-47	DCT	Cldn7
1.00461e-49	0.741194	0.464	0.202	2.81271e-45	DCT	Ctnna1
1.15031e-49	0.531912	0.944	0.848	3.22064e-45	DCT	mt-Nd3
1.4331e-49	0.531938	0.944	0.863	4.01238e-45	DCT	Cox5b
1.72207e-49	0.760223	0.445	0.18	4.82146e-45	DCT	Itga6
7.55771e-49	0.617622	0.258	0.067	2.11601e-44	DCT	Laptm4b
8.66636e-49	0.504267	0.433	0.159	2.42641e-44	DCT	Upp1
9.68174e-48	0.751434	0.752	0.509	2.71069e-43	DCT	Id2
1.77087e-47	0.738877	0.267	0.074	4.95808e-43	DCT	Gm16685
1.85728e-46	0.627045	0.867	0.678	5.20001e-42	DCT	Ldhb
7.28601e-46	0.762206	0.461	0.208	2.03994e-41	DCT	Gcnt2
2.61843e-44	0.592598	0.89	0.785	7.33108e-40	DCT	Cox7b
2.68572e-44	0.680684	0.571	0.304	7.51949e-40	DCT	Mgst3
5.82108e-44	0.364648	1	0.998	1.62979e-39	DCT	mt-Co2
3.03957e-43	0.706829	0.578	0.32	8.51019e-39	DCT	Idh2
1.49147e-42	0.689704	0.288	0.093	4.17581e-38	DCT	Ndrg2
9.4427e-42	0.619347	0.311	0.107	2.64377e-37	DCT	Usp53
3.82214e-41	0.425603	0.529	0.244	1.07012e-36	DCT	Sh3bgrl3
1.14541e-40	0.497208	0.735	0.484	3.20691e-36	DCT	Serinc3
3.33922e-40	0.676415	0.454	0.209	9.34916e-36	DCT	Oat
3.70086e-40	0.674554	0.382	0.158	1.03617e-35	DCT	Smagp
5.67894e-40	0.571017	0.265	0.083	1.58999e-35	DCT	Gbas
4.03876e-39	0.663825	0.55	0.312	1.13077e-34	DCT	Aes
7.31202e-39	0.447445	0.944	0.858	2.04722e-34	DCT	Uqcrh
1.51059e-38	0.642148	0.382	0.159	4.22936e-34	DCT	Paqr5
2.10184e-38	0.57016	0.71	0.473	5.88473e-34	DCT	Ivns1abp
3.3887e-38	0.636398	0.466	0.226	9.48769e-34	DCT	Wls
4.55886e-38	0.621511	0.407	0.172	1.27639e-33	DCT	Fabp3
7.91275e-38	0.76445	0.405	0.177	2.21541e-33	DCT	Mx1
4.50892e-37	0.484816	0.642	0.387	1.26241e-32	DCT	Btg1
8.9851e-36	0.315305	1	0.999	2.51565e-31	DCT	mt-Cytb
8.61771e-35	0.538531	0.251	0.081	2.41279e-30	DCT	Lamb1
1.03079e-34	0.957787	0.574	0.377	2.886e-30	DCT	Kl
1.31283e-34	0.576115	0.304	0.112	3.67567e-30	DCT	Aif1l
1.83664e-34	0.662238	0.649	0.427	5.14222e-30	DCT	Txnip
4.54393e-34	0.364121	0.974	0.926	1.27221e-29	DCT	Atp5l
1.02554e-32	0.615713	0.522	0.296	2.87131e-28	DCT	Aplp2
2.2055e-32	0.372652	0.97	0.9	6.17496e-28	DCT	Uqcrq
6.6999e-32	0.618023	0.52	0.305	1.87584e-27	DCT	Stat3
8.61979e-32	0.575735	0.337	0.143	2.41337e-27	DCT	Raly
3.93029e-30	0.319316	0.988	0.942	1.1004e-25	DCT	Cox8a
4.40074e-30	0.604701	0.3	0.123	1.23212e-25	DCT	Sorl1
6.5076e-30	0.349415	0.981	0.915	1.822e-25	DCT	Cox6b1
3.08342e-29	0.419746	0.852	0.754	8.63297e-25	DCT	Ndufb9
4.05182e-29	0.61325	0.482	0.273	1.13443e-24	DCT	Itgav
1.8275e-28	0.542435	0.609	0.405	5.11663e-24	DCT	Cd81
3.68753e-28	0.405481	0.67	0.457	1.03243e-23	DCT	Calm2
1.22854e-27	0.54433	0.316	0.14	3.43967e-23	DCT	Becn1
3.75819e-27	0.566414	0.377	0.188	1.05222e-22	DCT	Hadhb
5.27595e-26	0.495013	0.255	0.101	1.47716e-21	DCT	Acsl4
1.55181e-25	0.545204	0.616	0.448	4.34476e-21	DCT	Sdha
2.95629e-25	0.489306	0.26	0.104	8.27703e-21	DCT	Nfe2l1
3.51922e-25	0.538223	0.311	0.144	9.8531e-21	DCT	Trpm7
7.48398e-25	0.585861	0.415	0.233	2.09537e-20	DCT	Msi2
1.25131e-24	0.522008	0.623	0.469	3.50341e-20	DCT	Atp6v0e
1.82687e-24	0.329837	0.965	0.901	5.11487e-20	DCT	Cox6a1
2.66174e-24	0.488345	0.522	0.322	7.45234e-20	DCT	Cdh16
3.37698e-24	0.377082	0.89	0.797	9.45487e-20	DCT	Slc25a5
4.18541e-24	0.312374	0.956	0.885	1.17183e-19	DCT	Atp5j
6.92256e-24	0.413958	0.843	0.741	1.93818e-19	DCT	Atp5h
2.41221e-23	0.321757	0.902	0.852	6.75371e-19	DCT	Ndufa3
5.76023e-23	0.350891	0.674	0.47	1.61275e-18	DCT	Cd47
6.86107e-23	0.540865	0.279	0.125	1.92096e-18	DCT	Acss1
2.91104e-22	0.282805	0.984	0.942	8.15033e-18	DCT	Cox7c
3.73522e-21	0.469722	0.262	0.118	1.04579e-16	DCT	Acsl1
5.02016e-21	0.3444	0.867	0.79	1.40554e-16	DCT	Ndufc1
1.40408e-20	0.517878	0.377	0.203	3.93115e-16	DCT	Ier3
4.64004e-20	0.455817	0.253	0.113	1.29912e-15	DCT	S100a13
6.9637e-20	0.298068	0.941	0.878	1.9497e-15	DCT	Atp5j2
2.44423e-19	0.499796	0.293	0.149	6.84334e-15	DCT	Camta1
3.56347e-19	0.505262	0.356	0.199	9.97701e-15	DCT	Lsm6
3.67045e-19	0.482017	0.459	0.293	1.02765e-14	DCT	Rabac1
4.27899e-19	0.252557	0.972	0.917	1.19803e-14	DCT	Uqcr10
4.69187e-19	0.340024	0.71	0.573	1.31363e-14	DCT	Actg1
5.61215e-19	0.486086	0.494	0.328	1.57129e-14	DCT	Uqcc2
7.41906e-19	0.510816	0.354	0.202	2.07719e-14	DCT	Copa
1.21457e-18	0.459321	0.262	0.125	3.40056e-14	DCT	Selm
1.97186e-18	0.459489	0.426	0.268	5.52081e-14	DCT	Cpt1a
2.54962e-18	0.299246	0.96	0.868	7.13842e-14	DCT	2010107E04Rik
3.37074e-18	0.361403	0.789	0.653	9.43739e-14	DCT	Sdc4
7.19421e-18	0.510647	0.459	0.314	2.01423e-13	DCT	Echs1
2.11637e-17	0.443031	0.267	0.134	5.92541e-13	DCT	Larp1b
2.3441e-17	0.286268	0.564	0.405	6.56301e-13	DCT	Cst3
4.86155e-17	0.502743	0.384	0.238	1.36114e-12	DCT	Rtn3
6.07759e-17	0.314903	0.852	0.739	1.7016e-12	DCT	Ndufa7
1.05109e-16	0.467905	0.386	0.241	2.94284e-12	DCT	Aldh1l1
1.94139e-16	1.76939	0.625	0.541	5.4355e-12	DCT	S100g
2.0833e-16	0.271213	0.944	0.898	5.83283e-12	DCT	Usmg5
4.40909e-16	0.473438	0.309	0.175	1.23446e-11	DCT	Gnpnat1
7.42011e-16	0.408303	0.611	0.496	2.07748e-11	DCT	Ghitm
8.15641e-16	0.492237	0.258	0.134	2.28363e-11	DCT	Tgif1
8.17781e-16	0.446125	0.511	0.375	2.28962e-11	DCT	Aco2
8.48385e-16	0.502278	0.447	0.298	2.37531e-11	DCT	Tra2a
2.27387e-15	0.349886	0.602	0.456	6.36639e-11	DCT	Ctsb
2.35234e-15	0.434934	0.504	0.369	6.58608e-11	DCT	Ywhaq
3.54577e-15	0.277437	0.59	0.439	9.92744e-11	DCT	Cnn3
3.94697e-15	0.265767	0.899	0.844	1.10507e-10	DCT	Ndufa13
4.19829e-15	0.42833	0.33	0.197	1.17544e-10	DCT	Azin1
5.54956e-15	0.450251	0.33	0.196	1.55377e-10	DCT	1700011H14Rik
1.0591e-14	0.408339	0.33	0.192	2.96526e-10	DCT	Nfe2l2
1.58616e-14	0.343437	0.693	0.589	4.44094e-10	DCT	Ndufs5
1.76524e-14	0.358995	0.431	0.274	4.94231e-10	DCT	Wbp5
1.78856e-14	0.433038	0.382	0.245	5.0076e-10	DCT	Ubl3
2.24624e-14	0.431471	0.267	0.147	6.28903e-10	DCT	Chp1
3.71141e-14	0.441767	0.265	0.146	1.03912e-09	DCT	Map3k2
7.64471e-14	0.309415	0.745	0.661	2.14037e-09	DCT	Atp5o
7.98882e-14	0.410132	0.539	0.416	2.23671e-09	DCT	Ndufv2
8.72305e-14	0.460855	0.457	0.327	2.44228e-09	DCT	Gclc
2.07619e-13	0.434456	0.262	0.146	5.81291e-09	DCT	Ptprf
2.13009e-13	0.272937	0.827	0.77	5.96382e-09	DCT	Cox5a
2.23985e-13	0.409934	0.314	0.186	6.27113e-09	DCT	Pdk4
2.78417e-13	0.425929	0.511	0.4	7.79511e-09	DCT	Bag1
3.83265e-13	0.359453	0.712	0.651	1.07306e-08	DCT	Ubc
5.63387e-13	0.351357	0.274	0.152	1.57737e-08	DCT	Elovl7
6.05543e-13	0.338641	0.358	0.217	1.6954e-08	DCT	Etnk1
1.56715e-12	0.39532	0.546	0.441	4.38771e-08	DCT	Higd1a
2.19493e-12	0.429022	0.356	0.235	6.14536e-08	DCT	Erbb2ip
2.39737e-12	0.299381	0.803	0.728	6.71217e-08	DCT	Ndufb8
2.46063e-12	0.446868	0.473	0.359	6.88928e-08	DCT	Pdha1
2.9832e-12	0.370922	0.534	0.407	8.35237e-08	DCT	Prdx2
2.98462e-12	0.38017	0.269	0.156	8.35633e-08	DCT	Wwc1
3.73971e-12	0.377859	0.295	0.175	1.04704e-07	DCT	Tlr3
4.31442e-12	0.294709	0.792	0.732	1.20795e-07	DCT	Minos1
5.12177e-12	0.382836	0.422	0.301	1.43399e-07	DCT	Ogdh
5.93364e-12	0.389527	0.433	0.315	1.6613e-07	DCT	Bnip3
1.30027e-11	0.430326	0.471	0.366	3.6405e-07	DCT	Tmem59
1.33634e-11	0.416267	0.386	0.268	3.7415e-07	DCT	Mgst1
1.38781e-11	0.308964	0.733	0.648	3.88558e-07	DCT	Zfp36l1
1.48714e-11	0.410645	0.272	0.165	4.16369e-07	DCT	Actn4
1.97235e-11	0.396366	0.351	0.233	5.52218e-07	DCT	Sppl2a
4.22955e-11	0.4421	0.424	0.315	1.18419e-06	DCT	Dazap2
4.5112e-11	0.337453	0.639	0.549	1.26305e-06	DCT	Aldoa
5.46901e-11	0.372132	0.26	0.156	1.53121e-06	DCT	Hipk3
6.95833e-11	0.365343	0.288	0.177	1.94819e-06	DCT	Ccnd1
1.12671e-10	0.314638	0.536	0.425	3.15456e-06	DCT	Nampt
1.20121e-10	0.391319	0.253	0.153	3.36314e-06	DCT	Arf3
1.27105e-10	0.368838	0.269	0.165	3.5587e-06	DCT	Gpc4
1.45368e-10	0.273344	0.782	0.697	4.07e-06	DCT	Ndufa5
3.33678e-10	0.389839	0.3	0.195	9.34232e-06	DCT	Rpn1
3.53391e-10	0.375793	0.311	0.207	9.89424e-06	DCT	Reep3
6.64543e-10	0.406193	0.26	0.163	1.86059e-05	DCT	Susd6
7.10154e-10	0.346463	0.457	0.354	1.98829e-05	DCT	Ndufs2
7.94154e-10	0.31771	0.34	0.229	2.22347e-05	DCT	Pgrmc1
8.61308e-10	0.341402	0.602	0.527	2.41149e-05	DCT	Bsg
1.25036e-09	0.366638	0.508	0.407	3.50075e-05	DCT	1110001J03Rik
1.60892e-09	0.377871	0.309	0.204	4.50465e-05	DCT	Jmjd1c
2.14951e-09	0.295847	0.719	0.654	6.01821e-05	DCT	Ndufb11
2.8789e-09	0.326591	0.618	0.541	8.06034e-05	DCT	Ndufa11
5.23384e-09	0.347416	0.262	0.165	0.000146537	DCT	Tnfrsf12a
5.99329e-09	0.311153	0.496	0.407	0.0001678	DCT	Kcnj16
7.61172e-09	0.349164	0.468	0.379	0.000213113	DCT	Pet100
1.10738e-08	0.299852	0.508	0.408	0.000310045	DCT	Dstn
1.15457e-08	0.27885	0.382	0.273	0.000323256	DCT	Ddx58
2.1646e-08	0.310259	0.52	0.442	0.000606045	DCT	Atp6v1a
2.23162e-08	0.349209	0.272	0.179	0.000624808	DCT	1700020I14Rik
2.30767e-08	0.261108	0.735	0.675	0.000646102	DCT	Ndufb2
3.12894e-08	0.390236	0.342	0.255	0.00087604	DCT	Immt
5.45707e-08	0.295075	0.686	0.617	0.00152787	DCT	Atp6v1f
7.79771e-08	0.298591	0.583	0.493	0.0021832	DCT	Cyc1
1.48761e-07	0.286509	0.354	0.258	0.00416501	DCT	Ppib
1.88915e-07	0.268044	0.522	0.436	0.00528923	DCT	Canx
3.02078e-07	0.26756	0.621	0.552	0.00845759	DCT	Psap
3.61337e-07	0.309593	0.272	0.19	0.0101167	DCT	Ndufa9
3.66524e-07	0.297	0.297	0.209	0.0102619	DCT	Gas6
4.21546e-07	0.307821	0.321	0.234	0.0118024	DCT	Morf4l2
4.69747e-07	0.282066	0.304	0.217	0.013152	DCT	Rnf128
5.5506e-07	0.358788	0.26	0.18	0.0155406	DCT	Pkig
6.0481e-07	0.282613	0.466	0.381	0.0169335	DCT	Mdh2
6.20978e-07	0.273381	0.574	0.498	0.0173862	DCT	Morf4l1
6.86518e-07	0.361594	0.269	0.193	0.0192211	DCT	Got2
7.57052e-07	0.286361	0.307	0.224	0.0211959	DCT	Gls
8.87536e-07	0.259248	0.642	0.592	0.0248492	DCT	Ndufb7
2.00437e-06	0.275921	0.288	0.207	0.0561184	DCT	Hcfc1r1
2.31521e-06	0.293725	0.34	0.253	0.0648212	DCT	Ptbp3
4.6095e-06	0.39971	0.33	0.252	0.129057	DCT	Btg2
4.87246e-06	0.319342	0.372	0.303	0.136419	DCT	Gadd45a
5.21303e-06	0.270261	0.475	0.399	0.145954	DCT	Uqcrc1
5.87209e-06	0.314864	0.347	0.274	0.164407	DCT	Tm9sf2
6.97125e-06	0.286813	0.436	0.374	0.195181	DCT	BC005537
2.23863e-05	0.327758	0.274	0.207	0.62677	DCT	Birc3
3.2382e-05	0.252428	0.319	0.252	0.90663	DCT	Srp14
3.56215e-05	0.255681	0.618	0.579	0.99733	DCT	Ndufb5
6.37581e-05	0.297262	0.499	0.459	1	DCT	Hspa9
0.000122685	0.266666	0.356	0.297	1	DCT	Fus
0.000127304	0.251685	0.335	0.279	1	DCT	Ccni
0.000158125	0.286327	0.314	0.255	1	DCT	Ndufv1
0.000195314	0.258216	0.422	0.366	1	DCT	Csnk1a1
0	3.74552	0.99	0.024	0	CD-IC	Atp6v1g3
0	1.88425	0.786	0.004	0	CD-IC	Hepacam2
0	1.78737	0.534	0.005	0	CD-IC	Slc26a4
0	1.7442	0.427	0.003	0	CD-IC	Aqp6
0	1.72582	0.66	0.003	0	CD-IC	Foxi1
0	1.42053	0.65	0.002	0	CD-IC	Atp6v0d2
0	1.05416	0.437	0.003	0	CD-IC	Atp6v1c2
0	0.990947	0.427	0.002	0	CD-IC	Slc4a9
0	0.915973	0.262	0.001	0	CD-IC	Hmx2
0	0.855149	0.34	0.001	0	CD-IC	Insrr
0	0.719067	0.359	0.004	0	CD-IC	Rcan2
0	0.717613	0.301	0.002	0	CD-IC	Tmem61
8.06626e-293	1.14658	0.631	0.021	2.25839e-288	CD-IC	Serpinb6b
1.1876e-285	1.04165	0.505	0.013	3.32503e-281	CD-IC	Tmem117
3.63522e-269	1.31251	0.65	0.026	1.01779e-264	CD-IC	Rhbg
3.99019e-267	2.13721	0.689	0.031	1.11717e-262	CD-IC	Spink8
2.26595e-259	1.08765	0.524	0.016	6.34422e-255	CD-IC	Atp6v1b1
2.07643e-237	0.768136	0.272	0.003	5.81359e-233	CD-IC	Kit
3.49615e-215	1.08507	0.534	0.022	9.78851e-211	CD-IC	Pros1
1.68692e-203	0.847896	0.359	0.009	4.72303e-199	CD-IC	Oxgr1
1.02256e-197	0.958063	0.563	0.026	2.86295e-193	CD-IC	Foxq1
2.342e-172	1.04287	0.524	0.027	6.55714e-168	CD-IC	Alcam
1.04431e-170	0.790528	0.33	0.01	2.92387e-166	CD-IC	Parm1
2.66467e-169	1.14428	0.573	0.034	7.46053e-165	CD-IC	Ckmt1
1.1457e-163	0.816886	0.369	0.013	3.20773e-159	CD-IC	Cers4
6.97771e-142	0.616034	0.291	0.009	1.95362e-137	CD-IC	Ptger3
2.62859e-138	1.75558	0.816	0.092	7.35953e-134	CD-IC	Serpinb9
1.17671e-132	1.42993	0.777	0.088	3.29455e-128	CD-IC	Hexb
1.32219e-132	1.30773	0.573	0.044	3.70187e-128	CD-IC	Rgs2
2.61036e-129	1.13056	0.505	0.034	7.30848e-125	CD-IC	Emb
9.56392e-128	0.672579	0.33	0.014	2.67771e-123	CD-IC	Ybx2
2.7412e-119	0.93469	0.573	0.047	7.67482e-115	CD-IC	Cav2
1.98899e-115	1.35887	0.845	0.113	5.56876e-111	CD-IC	Epcam
3.13145e-106	1.0726	0.534	0.048	8.76743e-102	CD-IC	Efhd1
4.89754e-106	0.920321	0.408	0.027	1.37121e-101	CD-IC	Ociad2
1.41882e-104	2.0309	0.961	0.196	3.9724e-100	CD-IC	Tmem213
2.29517e-104	1.08131	0.699	0.08	6.42601e-100	CD-IC	St14
1.57499e-103	2.04422	0.893	0.172	4.40967e-99	CD-IC	Pam
3.50156e-101	1.12395	0.359	0.022	9.80366e-97	CD-IC	Car15
1.35888e-98	0.89836	0.466	0.038	3.80458e-94	CD-IC	Rhcg
2.67094e-98	0.964987	0.456	0.037	7.47809e-94	CD-IC	Plet1
5.06441e-97	0.861413	0.573	0.057	1.41793e-92	CD-IC	Scnn1a
8.42064e-93	1.06187	0.65	0.077	2.35761e-88	CD-IC	Clcnkb
1.46361e-90	1.76775	0.922	0.226	4.09781e-86	CD-IC	Pgrmc1
1.7372e-86	0.62096	0.34	0.023	4.86383e-82	CD-IC	Blnk
2.15079e-86	1.44338	0.544	0.06	6.02178e-82	CD-IC	Adgrf5
2.78856e-86	1.23714	0.738	0.114	7.80742e-82	CD-IC	Aif1l
2.1052e-84	0.633277	0.291	0.017	5.89414e-80	CD-IC	Rabep2
2.17418e-84	1.40024	0.641	0.091	6.08726e-80	CD-IC	Car12
6.01351e-83	0.908544	0.476	0.047	1.68366e-78	CD-IC	Serpinb1a
7.53842e-83	0.794807	0.437	0.04	2.11061e-78	CD-IC	Sowahc
8.78271e-82	1.35825	0.825	0.162	2.45898e-77	CD-IC	Atp6ap2
1.72532e-81	1.28735	0.748	0.131	4.83055e-77	CD-IC	Atp6ap1
2.09986e-78	0.957954	0.583	0.073	5.87919e-74	CD-IC	Muc1
1.02957e-73	0.602465	0.301	0.021	2.88259e-69	CD-IC	Exoc3l4
1.96034e-73	1.055	0.602	0.087	5.48856e-69	CD-IC	Anxa4
2.5577e-72	0.635577	0.301	0.021	7.16105e-68	CD-IC	BC023829
2.0342e-71	0.759588	0.417	0.042	5.69537e-67	CD-IC	Tmem50b
2.64758e-71	0.758347	0.359	0.031	7.41271e-67	CD-IC	Gata3
3.37829e-67	0.817436	0.534	0.07	9.45855e-63	CD-IC	Col18a1
1.20226e-66	0.906164	0.544	0.074	3.3661e-62	CD-IC	Foxp1
4.92373e-64	1.61088	0.981	0.44	1.37855e-59	CD-IC	Atp6v1a
1.51689e-63	1.04891	0.631	0.107	4.24698e-59	CD-IC	Cxadr
1.67367e-63	1.15894	0.806	0.17	4.68594e-59	CD-IC	Cdh1
2.64133e-60	0.557456	0.291	0.024	7.3952e-56	CD-IC	Limch1
7.53224e-59	0.533563	0.282	0.023	2.10888e-54	CD-IC	Mfsd6
1.05623e-56	0.688969	0.447	0.058	2.95723e-52	CD-IC	Krt7
3.56662e-56	1.06559	0.592	0.109	9.98583e-52	CD-IC	Dmxl1
3.88613e-56	0.479783	0.291	0.026	1.08804e-51	CD-IC	Kcnq1
8.36578e-56	0.487703	0.252	0.02	2.34225e-51	CD-IC	Jag1
1.79336e-55	0.738818	0.388	0.046	5.02104e-51	CD-IC	Cldn8
2.88645e-55	0.88386	0.495	0.075	8.08148e-51	CD-IC	Pde1a
7.39926e-55	1.12525	0.417	0.054	2.07165e-50	CD-IC	Aqp3
9.54e-54	0.682805	0.35	0.039	2.67101e-49	CD-IC	Ehf
3.04422e-53	0.62018	0.398	0.049	8.52322e-49	CD-IC	Itpr2
4.33641e-53	0.45405	0.262	0.022	1.21411e-48	CD-IC	Scg5
1.28613e-52	0.781715	0.369	0.044	3.6009e-48	CD-IC	Sgpp2
1.38381e-52	0.607222	0.34	0.037	3.87439e-48	CD-IC	Krt18
3.00498e-52	0.615231	0.35	0.039	8.41335e-48	CD-IC	Elovl6
3.47622e-50	0.775174	0.437	0.064	9.73273e-46	CD-IC	Rragd
5.66337e-50	0.509654	0.252	0.022	1.58563e-45	CD-IC	Nbea
7.01049e-50	0.95233	0.757	0.177	1.9628e-45	CD-IC	Cd9
4.5043e-48	1.14502	0.864	0.276	1.26111e-43	CD-IC	Itgav
2.95017e-47	1.1921	0.874	0.301	8.2599e-43	CD-IC	Aplp2
4.71041e-47	0.665877	0.359	0.045	1.31882e-42	CD-IC	Pcolce
1.18084e-46	0.487966	0.252	0.023	3.30612e-42	CD-IC	Fam13a
3.93294e-46	0.654433	0.33	0.04	1.10114e-41	CD-IC	Phlda1
4.97577e-46	0.628223	0.388	0.054	1.39312e-41	CD-IC	Bag4
6.324e-46	0.763398	0.437	0.069	1.77059e-41	CD-IC	Slc43a2
7.24624e-46	0.655081	0.359	0.047	2.0288e-41	CD-IC	Ralgapa2
3.35689e-45	0.764072	0.456	0.073	9.39861e-41	CD-IC	Kctd12
1.10954e-44	1.2579	0.854	0.323	3.1065e-40	CD-IC	Car2
1.2513e-43	0.830818	0.68	0.158	3.50339e-39	CD-IC	Pkm
1.29177e-43	0.753354	0.33	0.043	3.61671e-39	CD-IC	Scnn1b
1.30492e-43	0.650872	0.359	0.05	3.65353e-39	CD-IC	Rnf152
1.74148e-43	0.942573	0.709	0.192	4.87578e-39	CD-IC	Tfcp2l1
2.88708e-43	0.565106	0.272	0.029	8.08323e-39	CD-IC	Fam129a
1.77267e-42	1.12914	0.99	0.865	4.96311e-38	CD-IC	Itm2b
2.96241e-42	0.50269	0.252	0.026	8.29416e-38	CD-IC	Sh3bgrl2
4.1674e-42	0.655964	0.544	0.104	1.16679e-37	CD-IC	Csrp1
5.71382e-42	0.77019	0.553	0.115	1.59976e-37	CD-IC	Trp53inp2
1.78381e-41	1.2928	0.942	0.397	4.9943e-37	CD-IC	Defb1
8.71474e-41	0.574249	0.35	0.049	2.43995e-36	CD-IC	Mecom
1.1805e-40	0.742018	0.408	0.065	3.30518e-36	CD-IC	Scd2
2.43552e-40	0.541755	0.369	0.054	6.81897e-36	CD-IC	Ggh
8.78005e-40	0.609832	0.398	0.063	2.45824e-35	CD-IC	Ucp2
9.64664e-40	1.06518	0.631	0.167	2.70087e-35	CD-IC	Cox7a1
3.07134e-39	0.961623	0.359	0.058	8.59913e-35	CD-IC	Mme
9.144e-39	0.599541	0.34	0.048	2.56014e-34	CD-IC	Twsg1
9.72751e-39	0.626912	0.553	0.112	2.72351e-34	CD-IC	Mal
1.15641e-38	0.637115	0.262	0.031	3.2377e-34	CD-IC	Dsp
1.30256e-38	0.780838	0.602	0.142	3.6469e-34	CD-IC	Anxa5
2.23806e-37	0.675832	0.505	0.101	6.26611e-33	CD-IC	Tspan8
2.4705e-37	0.954139	0.748	0.242	6.9169e-33	CD-IC	Aldh1l1
4.11855e-37	0.545277	0.32	0.045	1.15311e-32	CD-IC	Plec
5.20156e-37	1.07219	0.971	0.491	1.45633e-32	CD-IC	Serinc3
1.51571e-35	0.722148	0.437	0.083	4.24368e-31	CD-IC	Cldn7
1.73927e-35	0.871971	0.398	0.071	4.86962e-31	CD-IC	Mal2
2.74228e-35	0.441227	0.262	0.033	7.67785e-31	CD-IC	Tspan13
6.02423e-35	0.917966	0.718	0.218	1.68666e-30	CD-IC	Etnk1
1.05682e-34	0.994288	0.854	0.328	2.95889e-30	CD-IC	Gclc
1.15493e-34	0.681507	0.485	0.105	3.23358e-30	CD-IC	Enpp5
1.19832e-34	0.481636	0.282	0.038	3.35505e-30	CD-IC	Pmvk
2.01849e-34	0.518271	0.388	0.067	5.65137e-30	CD-IC	Pbxip1
4.43185e-34	0.722331	0.631	0.164	1.24083e-29	CD-IC	Paqr5
5.266e-34	0.605719	0.291	0.042	1.47438e-29	CD-IC	Smtnl2
1.34972e-33	0.928263	0.65	0.201	3.77895e-29	CD-IC	Lsm6
1.68197e-33	0.781863	0.592	0.153	4.70919e-29	CD-IC	Elovl7
1.96461e-33	0.664794	0.495	0.108	5.50051e-29	CD-IC	Nfe2l1
3.76052e-33	0.931392	0.689	0.226	1.05287e-28	CD-IC	Ptp4a2
3.76489e-33	0.734118	0.505	0.11	1.05409e-28	CD-IC	Tmem52b
1.34011e-32	0.678121	0.379	0.071	3.75204e-28	CD-IC	Rpap3
1.56644e-32	1.05839	0.951	0.629	4.38572e-28	CD-IC	S100a1
2.57991e-32	0.95432	0.893	0.472	7.22324e-28	CD-IC	Atp6v0e
2.61571e-32	0.449147	0.272	0.037	7.32346e-28	CD-IC	Slit2
4.08112e-32	0.4185	0.252	0.033	1.14263e-27	CD-IC	5730508B09Rik
1.07116e-31	0.568994	0.311	0.049	2.99905e-27	CD-IC	Tspan1
2.51637e-31	0.363585	0.262	0.036	7.04532e-27	CD-IC	Epas1
2.52249e-31	0.668469	0.485	0.111	7.06245e-27	CD-IC	Dst
3.96262e-31	0.804839	0.641	0.195	1.10945e-26	CD-IC	Rpn1
4.80701e-31	0.550619	0.33	0.056	1.34587e-26	CD-IC	Myo1c
5.00735e-31	0.554887	0.417	0.084	1.40196e-26	CD-IC	Tbl1x
8.20328e-31	0.720495	0.427	0.09	2.29675e-26	CD-IC	Ttc39b
8.21385e-31	0.640918	0.456	0.1	2.29971e-26	CD-IC	Pdlim5
1.69578e-30	0.802949	0.874	0.375	4.74784e-26	CD-IC	Spint2
2.12532e-30	0.480863	0.35	0.06	5.95048e-26	CD-IC	Tmem72
2.27464e-30	0.508759	0.311	0.051	6.36854e-26	CD-IC	Cds1
2.39266e-30	0.394517	0.252	0.034	6.69896e-26	CD-IC	2020-09-09
2.42445e-30	0.75297	0.757	0.251	6.78798e-26	CD-IC	Ptbp3
7.31919e-30	0.831695	0.913	0.451	2.04923e-25	CD-IC	S100a11
1.22728e-29	0.60988	0.408	0.085	3.43614e-25	CD-IC	Pmepa1
1.41799e-29	0.746097	0.903	0.394	3.97009e-25	CD-IC	Btg1
1.51261e-29	0.586218	0.485	0.111	4.23501e-25	CD-IC	Hoxd8
2.32642e-29	0.819423	0.903	0.463	6.51351e-25	CD-IC	Calm2
1.04794e-28	0.789178	0.689	0.227	2.93401e-24	CD-IC	Atp6v0a4
1.08568e-28	0.463945	0.262	0.039	3.03969e-24	CD-IC	Tuba1a
[truncated: 4,444 more rows]

## Sheet: 16hr_markers
p-value	avg_logFC	pct.1	pct.2	p_val_adj	cluster	gene
0	1.13644	0.985	0.708	0	S1	Spink1
0	1.11158	1	0.985	0	S1	Gpx3
3.37506e-210	1.01241	0.84	0.394	9.4495e-206	S1	Tmem27
1.41579e-200	1.21808	0.478	0.093	3.96394e-196	S1	Spp2
1.40417e-181	0.619493	0.996	0.87	3.93139e-177	S1	Dbi
2.75956e-177	0.856758	0.898	0.503	7.72622e-173	S1	Fga
9.63409e-172	1.20997	0.686	0.279	2.69735e-167	S1	Ubd
2.53284e-170	0.779261	0.907	0.521	7.09144e-166	S1	Plin2
2.76365e-170	0.701236	0.979	0.773	7.73768e-166	S1	Plac8
3.17339e-164	1.04879	0.331	0.044	8.88486e-160	S1	Slc5a2
2.82296e-162	1.06257	0.542	0.161	7.90372e-158	S1	Slc4a4
1.45879e-141	0.739159	0.887	0.559	4.08432e-137	S1	Sepp1
1.50752e-137	0.600704	0.945	0.65	4.22074e-133	S1	Fgg
7.53449e-132	0.905531	0.626	0.261	2.10951e-127	S1	Dab2
2.88923e-130	0.650999	0.838	0.44	8.08927e-126	S1	Fgb
1.65292e-124	0.986497	0.456	0.139	4.62785e-120	S1	Idh1
3.90424e-121	0.942069	0.68	0.321	1.09311e-116	S1	Pck1
1.75762e-119	0.567293	0.933	0.818	4.92099e-115	S1	Tpt1
6.56114e-114	0.433052	0.974	0.805	1.83699e-109	S1	Gpx1
3.08585e-112	0.922277	0.333	0.077	8.63975e-108	S1	Maf
1.04999e-111	0.796951	0.56	0.217	2.93976e-107	S1	Slc34a1
7.06748e-109	0.918352	0.44	0.143	1.97875e-104	S1	Igfbp4
6.00944e-108	0.685294	0.868	0.592	1.68252e-103	S1	Tmsb10
1.90168e-102	0.878173	0.31	0.071	5.32431e-98	S1	1700016C15Rik
3.63133e-100	0.85665	0.257	0.048	1.0167e-95	S1	Slc6a19
1.55452e-99	0.631154	0.767	0.43	4.35236e-95	S1	Sult1d1
1.59134e-98	0.721366	0.582	0.255	4.45545e-94	S1	Acsm2
4.24809e-93	0.805437	0.358	0.107	1.18938e-88	S1	Mpp1
7.35821e-92	0.318798	1	0.999	2.06015e-87	S1	Fth1
9.13017e-92	0.675597	0.708	0.412	2.55626e-87	S1	Lgmn
4.58368e-91	0.492632	0.795	0.428	1.28334e-86	S1	Aldob
8.38946e-91	0.594711	0.812	0.527	2.34888e-86	S1	Irgm1
1.3388e-89	0.602906	0.748	0.432	3.74838e-85	S1	Ndrg1
1.56035e-83	0.326539	0.694	0.367	4.36867e-79	S1	Cd74
5.28888e-83	0.660322	0.647	0.337	1.48078e-78	S1	Errfi1
4.89991e-82	0.725849	0.341	0.106	1.37188e-77	S1	H2-DMb1
4.77387e-81	0.616207	0.729	0.442	1.33659e-76	S1	Iigp1
3.07532e-77	0.574036	0.342	0.109	8.61029e-73	S1	H2-Aa
4.52386e-76	0.720815	0.419	0.165	1.26659e-71	S1	Gsta2
9.03868e-76	0.682444	0.456	0.19	2.53065e-71	S1	Snx10
7.71552e-75	0.551423	0.762	0.475	2.16019e-70	S1	Ctsl
1.69172e-74	0.670875	0.481	0.209	4.73647e-70	S1	2200002D01Rik
2.54449e-71	0.64982	0.36	0.128	7.12407e-67	S1	Enpp2
4.65597e-71	0.552458	0.762	0.492	1.30358e-66	S1	Akr1a1
1.29319e-70	0.779699	0.404	0.161	3.62067e-66	S1	C3
1.10734e-68	0.629382	0.465	0.206	3.10033e-64	S1	Slc13a1
1.01929e-67	0.630418	0.405	0.163	2.85381e-63	S1	Ehhadh
1.38497e-64	0.658171	0.309	0.105	3.87764e-60	S1	Slc16a1
1.28349e-63	0.304708	0.998	0.979	3.59352e-59	S1	Ftl1
6.50631e-62	0.525248	0.659	0.381	1.82164e-57	S1	Comt
1.19067e-61	0.65157	0.285	0.094	3.33363e-57	S1	Steap2
5.18735e-60	0.418427	0.853	0.699	1.45235e-55	S1	Atox1
1.81084e-58	0.577004	0.54	0.289	5.07e-54	S1	Tcn2
1.03941e-57	0.52556	0.642	0.376	2.91015e-53	S1	Glul
1.18149e-55	0.673288	0.602	0.378	3.30794e-51	S1	Hspa5
1.61432e-55	0.605742	0.306	0.114	4.51977e-51	S1	Cyp4a31
2.03332e-54	0.616479	0.325	0.13	5.6929e-50	S1	Slc17a1
1.05867e-52	0.723625	0.385	0.18	2.96406e-48	S1	Acot2
3.27933e-51	0.429594	0.841	0.67	9.18148e-47	S1	Cstb
7.2824e-51	0.553345	0.515	0.279	2.03893e-46	S1	Tmem252
7.39172e-51	0.579349	0.418	0.197	2.06953e-46	S1	Gm9844
9.85329e-49	0.463043	0.263	0.094	2.75872e-44	S1	H2-Eb1
3.33725e-48	0.697242	0.282	0.11	9.34363e-44	S1	G6pc
4.28579e-48	0.379437	0.844	0.686	1.19993e-43	S1	Chchd2
1.0769e-47	0.409176	0.414	0.198	3.0151e-43	S1	H2-Ab1
1.17033e-46	0.59208	0.512	0.297	3.2767e-42	S1	Manf
1.52227e-46	0.546877	0.363	0.167	4.26205e-42	S1	Sectm1b
2.23987e-45	0.573456	0.383	0.186	6.27119e-41	S1	Id3
1.98956e-44	0.518679	0.41	0.204	5.57037e-40	S1	Alas1
2.98272e-44	0.354445	0.86	0.692	8.35103e-40	S1	Mgst1
1.09915e-43	0.494832	0.319	0.139	3.07741e-39	S1	Slc6a6
1.29861e-43	0.476435	0.334	0.148	3.63584e-39	S1	Gns
1.34917e-43	0.390874	0.758	0.559	3.77742e-39	S1	Mif
3.84827e-43	0.350969	0.84	0.665	1.07744e-38	S1	Gpx4
5.9561e-43	0.504809	0.36	0.17	1.66759e-38	S1	Calml4
7.39958e-41	0.380103	0.733	0.516	2.07174e-36	S1	Park7
1.95118e-39	0.49638	0.383	0.193	5.46292e-35	S1	Glyat
3.87483e-39	0.346984	0.775	0.59	1.08487e-34	S1	Atp6v1g1
8.48863e-39	0.479302	0.262	0.107	2.37665e-34	S1	Cldn2
8.66725e-39	0.379787	0.569	0.347	2.42666e-34	S1	Timp3
8.75996e-39	0.352039	0.753	0.566	2.45261e-34	S1	Selk
1.25837e-38	0.406001	0.379	0.186	3.52318e-34	S1	Ugt3a2
8.86478e-38	0.396614	0.621	0.405	2.48196e-33	S1	Chpt1
1.12401e-37	0.523646	0.481	0.287	3.14701e-33	S1	Hsp90b1
1.31708e-37	0.434008	0.334	0.158	3.68755e-33	S1	Kcnj15
1.347e-36	0.435752	0.55	0.347	3.77134e-32	S1	Wbp5
5.38301e-36	0.336945	0.84	0.665	1.50714e-31	S1	Gm10116
5.72095e-36	0.356676	0.423	0.223	1.60175e-31	S1	Fbp1
1.51187e-35	0.448278	0.355	0.179	4.23294e-31	S1	Cyp4a10
2.26371e-35	0.49909	0.339	0.17	6.33793e-31	S1	Fam134b
2.80683e-35	0.492047	0.281	0.128	7.85857e-31	S1	Got1
9.31769e-35	0.313758	0.758	0.54	2.60877e-30	S1	Cyba
1.73428e-34	0.452135	0.273	0.122	4.85564e-30	S1	Bpnt1
6.70366e-34	0.430939	0.35	0.179	1.87689e-29	S1	Hmgcs2
8.40571e-34	0.499735	0.323	0.161	2.35343e-29	S1	Herpud1
1.24208e-33	0.419692	0.356	0.183	3.47758e-29	S1	Ifit2
2.70065e-33	0.411913	0.485	0.288	7.56128e-29	S1	Calr
3.51066e-33	0.42977	0.279	0.129	9.82914e-29	S1	Acot1
4.1039e-33	0.353348	0.456	0.254	1.14901e-28	S1	Cda
1.77526e-32	0.427964	0.398	0.217	4.97038e-28	S1	Miox
1.97256e-32	0.299596	0.84	0.67	5.52276e-28	S1	Txn1
7.2309e-32	0.257938	0.914	0.782	2.02451e-27	S1	Cycs
1.6106e-31	0.388436	0.393	0.215	4.50937e-27	S1	Oxct1
1.05247e-30	0.400408	0.395	0.221	2.94671e-26	S1	Cat
1.51684e-30	0.439919	0.299	0.148	4.24685e-26	S1	Dnajb9
1.84556e-30	0.412288	0.252	0.115	5.16719e-26	S1	4931406C07Rik
2.2891e-30	0.366633	0.522	0.322	6.40903e-26	S1	Grina
8.90832e-30	0.399631	0.349	0.188	2.49415e-25	S1	Sephs2
5.77054e-29	0.286816	0.865	0.761	1.61564e-24	S1	Gbp2
6.91436e-29	0.365015	0.372	0.205	1.93588e-24	S1	Tmem106b
7.75406e-28	0.427177	0.711	0.556	2.17098e-23	S1	mt-Nd5
8.9049e-27	0.372887	0.424	0.252	2.49319e-22	S1	Gstm5
7.30826e-26	0.372994	0.28	0.143	2.04617e-21	S1	Gbp6.1
7.34222e-26	0.307432	0.629	0.443	2.05567e-21	S1	Igtp
8.31944e-26	0.368835	0.272	0.137	2.32928e-21	S1	Xdh
1.45251e-25	0.367353	0.32	0.173	4.06673e-21	S1	Glud1
4.82089e-25	0.372764	0.372	0.217	1.34975e-20	S1	Smim1
5.31307e-25	0.353597	0.496	0.324	1.48755e-20	S1	Plscr2
2.6337e-24	0.333329	0.267	0.136	7.37384e-20	S1	Lgr4
2.70792e-24	0.329147	0.5	0.329	7.58163e-20	S1	Eif4g2
1.46203e-23	0.290755	0.596	0.399	4.09339e-19	S1	Esd
2.55388e-23	0.351584	0.294	0.158	7.15034e-19	S1	Cyp2j5
3.21106e-23	0.360225	0.326	0.185	8.99033e-19	S1	Tmem140
3.4426e-23	0.346962	0.307	0.169	9.63858e-19	S1	Ass1
5.60023e-23	0.334222	0.632	0.469	1.56795e-18	S1	Psap
1.12257e-22	0.355364	0.27	0.143	3.14297e-18	S1	Lap3
4.39857e-22	0.32324	0.5	0.335	1.23151e-17	S1	Tomm20
6.8908e-22	0.288154	0.605	0.438	1.92929e-17	S1	Lamp2
2.75514e-21	0.300701	0.4	0.249	7.71384e-17	S1	Tgoln1
4.41121e-21	0.32815	0.302	0.171	1.23505e-16	S1	Abcd3
5.99984e-21	0.272567	0.574	0.408	1.67984e-16	S1	Ctsb
8.98198e-21	0.335624	0.291	0.165	2.51478e-16	S1	Adk
2.65217e-20	0.361187	0.393	0.249	7.42556e-16	S1	Ucp2
5.42103e-20	0.274885	0.341	0.202	1.51778e-15	S1	Serp1
1.47682e-19	0.26496	0.392	0.246	4.13479e-15	S1	Ifi47
8.22904e-19	0.279489	0.485	0.335	2.30397e-14	S1	Cnn3
8.27887e-19	0.34559	0.306	0.184	2.31792e-14	S1	St13
1.92948e-18	0.311078	0.294	0.173	5.40216e-14	S1	Aldh6a1
7.59594e-18	0.285197	0.788	0.696	2.12671e-13	S1	mt-Nd2
1.14987e-17	0.322818	0.269	0.158	3.2194e-13	S1	Atp6v1b2
6.26808e-17	0.273574	0.311	0.191	1.75494e-12	S1	Gstt2
7.53124e-17	0.276793	0.478	0.336	2.1086e-12	S1	Scp2
1.42667e-16	0.270299	0.379	0.248	3.99438e-12	S1	Cd14
2.3176e-16	0.261465	0.392	0.262	6.48881e-12	S1	Rab1a
4.13646e-16	0.259145	0.426	0.289	1.15813e-11	S1	Fkbp1a
5.88693e-16	0.252049	0.318	0.197	1.64822e-11	S1	Hnrnpab
9.0837e-16	0.328828	0.268	0.16	2.54325e-11	S1	Glrx
1.36168e-15	0.260772	0.469	0.331	3.81243e-11	S1	Gsr
4.26953e-15	0.250602	0.602	0.45	1.19538e-10	S1	Cisd1
5.65425e-15	0.261227	0.469	0.334	1.58308e-10	S1	Mdh1
8.96348e-13	0.273864	0.267	0.169	2.50959e-08	S1	Copa
5.65953e-110	0.802819	0.971	0.689	1.58456e-105	S2	Fgg
1.40691e-102	0.760558	0.987	0.801	3.93906e-98	S2	Plac8
3.30047e-89	0.580823	0.996	0.888	9.24065e-85	S2	Dbi
1.37342e-87	0.422657	1	1	3.8453e-83	S2	Fth1
2.43925e-87	0.560765	1	0.988	6.82942e-83	S2	Gpx3
1.95841e-83	0.818469	0.861	0.495	5.48316e-79	S2	Fgb
2.47521e-81	0.790372	0.986	0.931	6.9301e-77	S2	Guca2b
1.27176e-76	0.602647	0.987	0.747	3.56067e-72	S2	Spink1
4.01403e-76	0.790936	0.827	0.478	1.12385e-71	S2	Aldob
7.11201e-69	0.670757	0.908	0.559	1.99122e-64	S2	Fga
1.30508e-66	0.708444	0.872	0.581	3.65397e-62	S2	Plin2
5.13129e-66	0.877194	0.798	0.477	1.43666e-61	S2	Saa1
4.59041e-56	0.473263	0.978	0.829	1.28522e-51	S2	Gpx1
5.25579e-56	0.705923	0.722	0.407	1.47152e-51	S2	Hrsp12
1.3203e-51	0.378213	1	0.982	3.69658e-47	S2	Ftl1
4.28537e-51	0.545184	0.881	0.607	1.19982e-46	S2	Sepp1
6.14061e-48	0.450365	0.982	0.945	1.71925e-43	S2	Ubb
7.28063e-45	0.626941	0.608	0.316	2.03843e-40	S2	Dab2
1.19571e-43	0.691411	0.504	0.239	3.34775e-39	S2	Slc13a1
6.20999e-43	0.493769	0.861	0.633	1.73867e-38	S2	Tmsb10
1.74436e-38	0.402698	0.942	0.797	4.88385e-34	S2	Cycs
2.89781e-37	0.531067	0.742	0.482	8.11328e-33	S2	Sult1d1
6.63331e-37	0.630865	0.567	0.307	1.85719e-32	S2	Tmem252
6.57941e-36	0.497935	0.787	0.572	1.8421e-31	S2	Irgm1
1.02515e-34	0.661354	0.419	0.195	2.87023e-30	S2	Hmgcs2
1.35533e-34	0.449868	0.875	0.686	3.79465e-30	S2	Gm10116
5.55557e-34	0.534225	0.67	0.42	1.55545e-29	S2	Comt
7.26051e-33	0.420164	0.753	0.47	2.0328e-28	S2	Tmem27
1.20689e-32	0.454087	0.605	0.337	3.37906e-28	S2	Slc27a2
4.50422e-32	0.400522	0.865	0.692	1.26109e-27	S2	Cstb
1.22368e-31	0.308461	0.807	0.562	3.42607e-27	S2	AW112010
2.06456e-31	0.517667	0.433	0.206	5.78037e-27	S2	Cyp4b1
4.40397e-31	0.602252	0.495	0.268	1.23302e-26	S2	Gstm5
1.82378e-30	0.570117	0.458	0.236	5.10623e-26	S2	Miox
2.35366e-30	0.581759	0.448	0.229	6.58978e-26	S2	Alas1
3.10101e-30	0.480725	0.726	0.505	8.68221e-26	S2	Cyb5a
5.53835e-30	0.541651	0.482	0.254	1.55063e-25	S2	Cd14
1.81201e-28	0.385768	0.865	0.691	5.07327e-24	S2	Txn1
2.59982e-28	0.462783	0.745	0.519	7.27897e-24	S2	Ctsl
1.03487e-27	0.427042	0.747	0.536	2.89742e-23	S2	Sod2
2.84888e-27	0.56163	0.417	0.217	7.97628e-23	S2	Glyat
5.51445e-27	0.470356	0.708	0.487	1.54393e-22	S2	Iigp1
1.15783e-26	0.550605	0.372	0.181	3.24169e-22	S2	Ass1
2.25066e-26	0.396766	0.8	0.583	6.30138e-22	S2	Mif
2.51231e-26	0.590164	0.41	0.213	7.03397e-22	S2	Khk
5.03982e-26	0.483612	0.538	0.308	1.41105e-21	S2	Acsm2
2.17842e-25	0.58579	0.449	0.249	6.09913e-21	S2	Fbp1
1.29589e-24	0.319624	0.875	0.714	3.62823e-20	S2	Mgst1
2.02006e-24	0.376634	0.93	0.849	5.65577e-20	S2	Prdx1
2.03192e-24	0.565208	0.394	0.205	5.68896e-20	S2	Gsta2
5.72937e-24	0.375828	0.616	0.381	1.60411e-19	S2	Pck1
1.76192e-23	0.420518	0.749	0.546	4.93301e-19	S2	Park7
3.90517e-23	0.458453	0.623	0.424	1.09337e-18	S2	Esd
1.12466e-22	0.470859	0.316	0.149	3.14882e-18	S2	Slc51b
1.46445e-22	0.325755	0.774	0.57	4.10018e-18	S2	Cyba
2.43888e-22	0.53349	0.339	0.173	6.82837e-18	S2	Timd2
3.30735e-22	0.301221	0.78	0.605	9.25993e-18	S2	Cebpb
1.22924e-21	0.490227	0.471	0.281	3.44164e-17	S2	Cda
1.79214e-21	0.423644	0.419	0.229	5.01763e-17	S2	Gm9844
1.90451e-21	0.469756	0.341	0.172	5.33225e-17	S2	Cyp2j5
5.2503e-21	0.38907	0.686	0.485	1.46998e-16	S2	Ndrg1
7.66874e-21	0.5121	0.323	0.163	2.14709e-16	S2	Havcr1
1.36445e-19	0.262781	0.964	0.881	3.82019e-15	S2	Cd63
4.01312e-19	0.475502	0.496	0.317	1.12359e-14	S2	Eno1
6.01216e-19	0.420079	0.345	0.182	1.68329e-14	S2	Kcnj15
6.15695e-19	0.453878	0.404	0.235	1.72382e-14	S2	Snx10
1.06942e-18	0.472913	0.357	0.197	2.99415e-14	S2	Calml4
1.44977e-18	0.336737	0.724	0.536	4.05906e-14	S2	Akr1a1
1.69455e-18	0.429058	0.428	0.255	4.7444e-14	S2	2200002D01Rik
4.63114e-18	0.513124	0.359	0.198	1.29663e-13	S2	Ugt2b38
9.11837e-18	0.417453	0.601	0.42	2.55296e-13	S2	Glul
1.15902e-17	0.434053	0.368	0.212	3.24501e-13	S2	Acot2
1.21135e-17	0.385582	0.626	0.453	3.39154e-13	S2	Gm10053
1.85138e-17	0.457185	0.348	0.195	5.18349e-13	S2	Akr1c21
2.96156e-17	0.33956	0.755	0.592	8.29178e-13	S2	Ybx1
4.41284e-17	0.633694	0.352	0.203	1.23551e-12	S2	Saa2
1.49097e-16	0.499103	0.31	0.17	4.1744e-12	S2	Glrx
2.66464e-16	0.36939	0.312	0.167	7.46046e-12	S2	Enpp2
3.94839e-16	0.427646	0.471	0.313	1.10547e-11	S2	Pdk4
4.62487e-15	0.460755	0.319	0.184	1.29487e-10	S2	Tgtp1
1.84213e-14	0.336776	0.617	0.437	5.1576e-10	S2	Chpt1
2.74014e-14	0.341449	0.59	0.427	7.67183e-10	S2	Tmbim4
3.16229e-14	0.390191	0.348	0.205	8.85378e-10	S2	Ehhadh
4.09345e-14	0.325512	0.403	0.245	1.14608e-09	S2	Cat
5.13321e-14	0.396969	0.532	0.382	1.4372e-09	S2	S100a10
5.19504e-14	0.331768	0.388	0.236	1.45451e-09	S2	Slc4a4
5.38695e-14	0.375842	0.339	0.198	1.50824e-09	S2	Sectm1b
6.62508e-14	0.379172	0.341	0.203	1.85489e-09	S2	Tmem140
6.76979e-14	0.353152	0.363	0.216	1.89541e-09	S2	Ugt3a2
1.04942e-13	0.260858	0.753	0.6	2.93817e-09	S2	Rpl22l1
1.29755e-13	0.353563	0.255	0.135	3.63289e-09	S2	Aass
2.06902e-13	0.267223	0.834	0.693	5.79283e-09	S2	Atpif1
4.93539e-13	0.43074	0.347	0.213	1.38181e-08	S2	Hist1h2bc
6.04705e-13	0.362855	0.274	0.154	1.69305e-08	S2	Mpp1
7.79301e-13	0.294923	0.569	0.41	2.18189e-08	S2	Selenbp1
1.42415e-12	0.387046	0.319	0.197	3.98734e-08	S2	Aldh2
2.18037e-12	0.309318	0.628	0.468	6.1046e-08	S2	Cisd1
2.84145e-12	0.380986	0.424	0.284	7.95548e-08	S2	Slc34a1
4.84087e-12	0.309117	0.751	0.62	1.35535e-07	S2	Atp6v1g1
4.87622e-12	0.365333	0.291	0.17	1.36524e-07	S2	Gm8797
6.27315e-12	0.374274	0.282	0.164	1.75636e-07	S2	Ak2
7.13079e-12	0.283053	0.401	0.257	1.99648e-07	S2	Acox1
7.53593e-12	0.302881	0.482	0.333	2.10991e-07	S2	Tcn2
7.70917e-12	0.333227	0.496	0.355	2.15841e-07	S2	Bnip3
1.10729e-11	0.393702	0.289	0.171	3.10019e-07	S2	Atp6v1b2
1.19519e-11	0.345152	0.348	0.22	3.34631e-07	S2	Zfos1
1.38038e-11	0.33927	0.31	0.186	3.86477e-07	S2	Lrg1
1.78932e-11	0.306325	0.283	0.163	5.00974e-07	S2	Slc17a1
2.08231e-11	0.28227	0.662	0.527	5.83005e-07	S2	Rpl10
2.34773e-11	0.259825	0.773	0.666	6.57318e-07	S2	Sat1
3.00342e-11	0.387733	0.301	0.188	8.40897e-07	S2	Ethe1
4.82821e-11	0.326544	0.525	0.39	1.3518e-06	S2	Msrb1
4.97548e-11	0.343514	0.509	0.363	1.39303e-06	S2	Etfb
6.38011e-11	0.270723	0.625	0.47	1.7863e-06	S2	Igtp
1.33974e-10	0.312164	0.368	0.24	3.751e-06	S2	Smim1
1.70813e-10	0.260571	0.54	0.396	4.78243e-06	S2	Errfi1
3.27955e-10	0.376855	0.256	0.154	9.18209e-06	S2	Acot1
3.58195e-10	0.34452	0.256	0.151	1.00287e-05	S2	H2-DMb1
3.67976e-10	0.29587	0.424	0.288	1.03026e-05	S2	Gclm
5.70603e-10	0.319206	0.251	0.149	1.59757e-05	S2	Cyp4a31
6.05371e-10	0.328897	0.28	0.172	1.69492e-05	S2	Dnajb9
1.9846e-09	0.266687	0.561	0.428	5.55649e-05	S2	Hint2
2.08914e-09	0.273811	0.321	0.207	5.84918e-05	S2	Gstt2
3.69964e-09	0.307915	0.319	0.209	0.000103582	S2	Cyp4a10
5.25622e-09	0.293549	0.334	0.221	0.000147164	S2	Id3
1.79911e-08	0.293088	0.298	0.197	0.000503715	S2	Glud1
2.22096e-08	0.30991	0.48	0.364	0.000621826	S2	Ubd
2.78194e-08	0.292867	0.301	0.202	0.000778888	S2	St13
3.30323e-08	0.272106	0.428	0.31	0.000924838	S2	Hibadh
4.38077e-08	0.261342	0.343	0.236	0.00122653	S2	Rhoc
5.18432e-08	0.273978	0.504	0.388	0.00145151	S2	Ost4
6.6295e-08	0.300739	0.28	0.185	0.00185613	S2	Adk
1.29245e-07	0.260123	0.329	0.225	0.00361861	S2	Txndc17
1.88114e-07	0.300691	0.271	0.18	0.00526681	S2	Znhit1
6.47884e-07	0.251687	0.487	0.372	0.0181395	S2	Eif6
7.5242e-07	0.274113	0.285	0.195	0.0210663	S2	Psma5
8.4034e-07	0.256128	0.253	0.168	0.0235278	S2	Cndp2
6.01107e-06	0.257375	0.292	0.21	0.168298	S2	C3
7.57338e-06	0.263177	0.271	0.19	0.212039	S2	Tubb4b
8.22024e-06	0.270423	0.291	0.208	0.23015	S2	Hagh
1.19676e-05	0.255242	0.372	0.285	0.335068	S2	Vps29
2.70432e-05	0.25165	0.262	0.187	0.757155	S2	Cib1
7.2561e-05	0.257021	0.283	0.214	1	S2	Cmpk1
0	2.53577	0.997	0.575	0	S3	Kap
1.76922e-300	1.54564	0.54	0.049	4.95345e-296	S3	Cyp2e1
4.96851e-279	1.59367	0.75	0.154	1.39108e-274	S3	Cyp4b1
4.68111e-247	1.50738	0.864	0.292	1.31062e-242	S3	Slc27a2
8.35657e-225	1.52188	0.997	0.928	2.33967e-220	S3	Guca2b
4.79123e-203	1.29388	0.494	0.072	1.34145e-198	S3	Napsa
1.44059e-200	1.06133	0.992	0.824	4.03335e-196	S3	Gpx1
2.659e-196	1.23156	0.386	0.038	7.44467e-192	S3	Cd36
1.94543e-186	1.09803	0.309	0.021	5.4468e-182	S3	Slc5a8
2.77347e-177	1.10479	0.333	0.029	7.76517e-173	S3	Tmigd1
2.85497e-162	1.16767	0.454	0.077	7.99335e-158	S3	Acy3
2.48393e-157	1.24224	0.458	0.082	6.9545e-153	S3	Adh1
2.31505e-156	1.07424	0.386	0.054	6.48168e-152	S3	Nat8
2.40842e-154	1.14728	0.389	0.057	6.74309e-150	S3	Mep1a
5.95531e-144	1.30755	0.872	0.458	1.66737e-139	S3	Saa1
3.98688e-143	0.859139	0.988	0.68	1.11625e-138	S3	Fgg
1.28686e-132	0.987376	0.327	0.045	3.60294e-128	S3	Eif4ebp3
1.82863e-130	1.07437	0.573	0.163	5.1198e-126	S3	Ugt2b38
2.37753e-130	0.993031	0.821	0.386	6.65661e-126	S3	Hrsp12
2.27887e-125	1.07815	0.514	0.131	6.38038e-121	S3	Havcr1
1.4e-123	0.988056	0.804	0.371	3.91972e-119	S3	Selenbp1
2.7805e-122	1.01071	0.503	0.128	7.78483e-118	S3	Cndp2
1.99456e-119	0.745282	0.954	0.59	5.58438e-115	S3	Sepp1
1.75773e-116	1.02305	0.475	0.122	4.92131e-112	S3	Slc51b
3.51744e-116	0.788023	0.944	0.546	9.84812e-112	S3	Fga
6.65287e-116	1.00874	0.31	0.047	1.86267e-111	S3	Slc6a18
1.68168e-115	0.873812	0.852	0.482	4.70836e-111	S3	Cyb5a
2.7025e-113	0.989935	0.395	0.083	7.56645e-109	S3	Slc25a22
2.49848e-110	1.00142	0.568	0.182	6.99524e-106	S3	Ugt3a2
5.52485e-110	0.593086	0.991	0.887	1.54685e-105	S3	Dbi
4.01363e-105	0.701684	0.886	0.545	1.12374e-100	S3	AW112010
9.99161e-105	0.878974	0.861	0.465	2.79745e-100	S3	Aldob
8.85946e-102	0.483966	0.998	0.982	2.48047e-97	S3	Ftl1
2.00182e-101	0.941713	0.608	0.222	5.60469e-97	S3	Acox1
2.7221e-100	0.887577	0.645	0.251	7.62134e-96	S3	Cda
5.44249e-98	0.891917	0.494	0.146	1.52379e-93	S3	Timd2
4.99401e-95	0.828204	0.872	0.485	1.39822e-90	S3	Fgb
9.00269e-95	0.945008	0.435	0.117	2.52057e-90	S3	Cyp4a14
8.24685e-94	0.903033	0.498	0.155	2.30895e-89	S3	Lrg1
2.15877e-93	0.956735	0.509	0.167	6.04411e-89	S3	Akr1c21
2.82654e-91	0.960634	0.409	0.109	7.91375e-87	S3	Aass
6.07606e-89	0.85761	0.253	0.041	1.70117e-84	S3	Slco1a6
1.30134e-85	0.895926	0.532	0.191	3.64349e-81	S3	Khk
1.41002e-85	0.835045	0.491	0.159	3.94777e-81	S3	Ass1
1.43068e-84	0.771689	0.392	0.103	4.00563e-80	S3	Slc22a12
1.40888e-83	0.758588	0.748	0.356	3.94458e-79	S3	Pck1
1.9685e-83	0.873449	0.579	0.225	5.51141e-79	S3	Fbp1
2.23064e-81	0.788946	0.664	0.284	6.24534e-77	S3	Acsm2
3.84802e-81	0.338688	1	1	1.07737e-76	S3	Fth1
1.18034e-78	0.818827	0.506	0.178	3.30472e-74	S3	Cyp4a10
1.0238e-77	0.780963	0.326	0.078	2.86643e-73	S3	Ggt1
5.31362e-76	0.469226	0.988	0.742	1.48771e-71	S3	Spink1
1.76005e-75	1.51531	0.48	0.181	4.92779e-71	S3	Saa2
1.44489e-73	0.583593	0.971	0.841	4.0454e-69	S3	Prdx1
2.63521e-72	0.723953	0.606	0.254	7.37806e-68	S3	Slc34a1
5.33666e-72	0.734252	0.551	0.217	1.49416e-67	S3	Miox
7.67645e-71	0.58732	0.912	0.676	2.14925e-66	S3	Gm10116
7.69941e-71	0.742632	0.448	0.152	2.15568e-66	S3	Cyp2j5
2.13707e-70	0.779344	0.586	0.261	5.98335e-66	S3	Gclm
6.68803e-69	0.741705	0.698	0.356	1.87251e-64	S3	Timp3
1.11697e-68	0.664291	0.645	0.289	3.12731e-64	S3	Tmem252
7.97454e-67	0.728024	0.319	0.085	2.23271e-62	S3	Pank1
1.04471e-66	0.679452	0.827	0.501	2.92498e-62	S3	Ctsl
3.40107e-66	0.492382	0.943	0.794	9.52232e-62	S3	Cycs
1.18917e-65	0.803666	0.355	0.108	3.32944e-61	S3	Ldhd
3.9699e-65	0.54663	0.866	0.551	1.11149e-60	S3	Cyba
8.40994e-65	0.786068	0.478	0.183	2.35462e-60	S3	Ehhadh
1.08679e-62	0.604499	0.753	0.413	3.04278e-58	S3	Chpt1
2.5463e-62	0.861923	0.349	0.109	7.12912e-58	S3	Gdf15
3.14208e-60	0.482386	0.972	0.8	8.79719e-56	S3	Plac8
3.09364e-59	0.692652	0.298	0.082	8.66157e-55	S3	Apom
3.87843e-59	0.536675	0.889	0.572	1.08588e-54	S3	Plin2
2.46076e-57	0.549172	0.883	0.647	6.88965e-53	S3	Sat1
8.59807e-56	0.714197	0.509	0.226	2.40729e-51	S3	Cat
7.32961e-54	0.66302	0.35	0.119	2.05214e-49	S3	Folr1
4.5474e-53	0.620145	0.323	0.102	1.27318e-48	S3	Nudt19
8.24614e-53	0.610672	0.597	0.291	2.30875e-48	S3	Pdk4
2.60761e-52	0.454968	0.827	0.452	7.3008e-48	S3	Tmem27
8.93253e-52	0.596908	0.341	0.112	2.50093e-47	S3	Atp11a
9.45144e-52	0.598754	0.485	0.202	2.64622e-47	S3	Glyat
3.01021e-50	0.669913	0.449	0.186	8.42798e-46	S3	Hmgcs2
5.38444e-50	0.676953	0.343	0.119	1.50754e-45	S3	Pcx
1.28799e-49	0.497082	0.807	0.522	3.60612e-45	S3	Sod2
1.95971e-49	0.348727	0.994	0.943	5.48679e-45	S3	Ubb
2.33376e-49	0.594476	0.304	0.096	6.53407e-45	S3	Ghr
1.13326e-48	0.54484	0.281	0.084	3.17289e-44	S3	Cd302
7.94409e-48	0.586339	0.272	0.081	2.22419e-43	S3	Bphl
1.75356e-47	0.577743	0.552	0.265	4.90962e-43	S3	Ech1
1.96093e-47	0.475441	0.823	0.53	5.49021e-43	S3	Park7
1.13636e-46	0.693173	0.438	0.187	3.18157e-42	S3	Gstt2
3.18468e-46	0.571429	0.48	0.212	8.91648e-42	S3	2310039H08Rik
4.5762e-46	0.531918	0.363	0.134	1.28124e-41	S3	Ccdc107
4.91775e-46	0.639469	0.326	0.114	1.37687e-41	S3	Lrp2
2.24386e-45	0.537109	0.576	0.285	6.28237e-41	S3	Hibadh
3.30518e-45	0.549882	0.69	0.41	9.25384e-41	S3	Esd
5.97281e-45	0.630704	0.275	0.086	1.67227e-40	S3	8430408G22Rik
8.00551e-45	0.598727	0.503	0.233	2.24138e-40	S3	Slc13a1
5.14027e-44	0.262667	1	0.987	1.43917e-39	S3	Gpx3
6.96186e-44	0.502588	0.71	0.408	1.94918e-39	S3	Comt
7.2745e-44	0.527197	0.65	0.368	2.03671e-39	S3	Msrb1
3.01782e-43	0.60557	0.475	0.22	8.44929e-39	S3	Alas1
4.33657e-42	0.578817	0.503	0.246	1.21415e-37	S3	Cd14
4.62785e-42	0.578091	0.429	0.187	1.29571e-37	S3	Tmem140
2.22553e-41	0.586489	0.349	0.135	6.23104e-37	S3	Acat1
8.55077e-41	0.526822	0.519	0.259	2.39404e-36	S3	Gstm5
1.43442e-39	0.58494	0.397	0.171	4.01608e-35	S3	Kcnj15
3.41155e-39	0.574532	0.465	0.223	9.55165e-35	S3	Xbp1
4.43677e-39	0.397624	0.782	0.47	1.24221e-34	S3	Sult1d1
9.88701e-39	0.486096	0.704	0.437	2.76817e-34	S3	Gm10053
1.30737e-38	0.481791	0.75	0.471	3.66039e-34	S3	Ndrg1
1.48495e-38	0.526145	0.432	0.197	4.15757e-34	S3	Hist1h2bc
1.34299e-37	0.561437	0.301	0.112	3.76011e-33	S3	Hmox1
2.2463e-37	0.467764	0.781	0.523	6.2892e-33	S3	Akr1a1
1.37351e-36	0.537518	0.355	0.147	3.84556e-32	S3	Lap3
1.75818e-36	0.54489	0.335	0.136	4.92255e-32	S3	Gstp1
5.03944e-36	0.354955	0.901	0.707	1.41094e-31	S3	Mgst1
1.01337e-35	0.530009	0.307	0.118	2.83724e-31	S3	Ccs
1.14604e-35	0.503723	0.735	0.481	3.20868e-31	S3	Hspa8
2.50154e-35	0.50128	0.285	0.105	7.00381e-31	S3	Ttc36
4.04696e-35	0.549708	0.336	0.138	1.13307e-30	S3	Tmem205
5.61675e-35	0.464939	0.58	0.315	1.57258e-30	S3	Tcn2
1.06622e-34	0.454358	0.349	0.145	2.9852e-30	S3	Slc25a39
2.35075e-34	0.519206	0.272	0.1	6.58163e-30	S3	Pxmp4
1.90585e-33	0.347834	0.892	0.683	5.33601e-29	S3	Txn1
3.42918e-33	0.40254	0.843	0.623	9.60103e-29	S3	Hint1
4.65681e-33	0.514977	0.395	0.183	1.30381e-28	S3	Aldh2
1.77771e-32	0.506169	0.377	0.173	4.97722e-28	S3	Tubb4b
3.6429e-32	0.541138	0.344	0.152	1.01994e-27	S3	Ak2
9.1431e-32	0.405085	0.802	0.564	2.55988e-27	S3	H2afj
1.10762e-31	0.441618	0.356	0.159	3.10112e-27	S3	0610011F06Rik
3.78899e-31	0.493642	0.341	0.15	1.06084e-26	S3	Crot
6.60004e-31	0.512089	0.264	0.102	1.84788e-26	S3	Ugdh
9.19802e-31	0.503046	0.377	0.176	2.57526e-26	S3	Aldh6a1
1.15898e-30	0.451168	0.397	0.188	3.24491e-26	S3	Calml4
1.48298e-30	0.394465	0.779	0.536	4.15205e-26	S3	Nop10
1.51439e-30	0.484937	0.48	0.249	4.24e-26	S3	Sqstm1
5.36432e-30	0.487243	0.34	0.152	1.5019e-25	S3	Slc17a1
5.60233e-29	0.42087	0.681	0.457	1.56854e-24	S3	Cisd1
9.02736e-29	0.438335	0.253	0.098	2.52748e-24	S3	Polr3e
1.33138e-28	0.4499	0.324	0.146	3.72758e-24	S3	Xdh
3.99653e-28	0.261557	0.938	0.798	1.11895e-23	S3	Prdx5
4.13927e-28	0.445164	0.494	0.276	1.15891e-23	S3	Hspe1
2.45712e-27	0.457821	0.262	0.107	6.87944e-23	S3	Abcg2
4.18992e-27	0.374848	0.657	0.407	1.17309e-22	S3	Glul
5.31021e-27	0.500925	0.378	0.189	1.48675e-22	S3	Sectm1b
6.32406e-27	0.473111	0.295	0.13	1.77061e-22	S3	G6pc
1.84646e-26	0.341846	0.864	0.686	5.16973e-22	S3	Atpif1
3.73788e-26	0.374301	0.776	0.553	1.04653e-21	S3	Chchd10
3.81484e-26	0.407376	0.569	0.34	1.06808e-21	S3	Scp2
9.29106e-26	0.440316	0.468	0.261	2.60131e-21	S3	Etfa
9.44707e-26	0.41748	0.282	0.122	2.64499e-21	S3	Aprt
5.0095e-25	0.367668	0.485	0.27	1.40256e-20	S3	Glrx5
9.29697e-25	0.396948	0.409	0.212	2.60297e-20	S3	Slc3a2
2.2409e-24	0.317486	0.875	0.687	6.27407e-20	S3	Cstb
2.69279e-24	0.344463	0.622	0.38	7.53927e-20	S3	Errfi1
5.27966e-24	0.3957	0.378	0.192	1.4782e-19	S3	Suclg1
5.73567e-24	0.379868	0.27	0.118	1.60587e-19	S3	Sox9
7.34901e-24	0.389081	0.252	0.106	2.05757e-19	S3	Eci2
2.94074e-23	0.355635	0.577	0.356	8.23347e-19	S3	Eif6
6.07081e-23	0.36007	0.333	0.164	1.6997e-18	S3	Glrx
7.40109e-23	0.404892	0.273	0.125	2.07216e-18	S3	Cldn2
8.79758e-23	0.401695	0.363	0.187	2.46315e-18	S3	Nhp2
1.85181e-22	0.371683	0.73	0.503	5.1847e-18	S3	Gapdh
3.61148e-22	0.333834	0.802	0.578	1.01114e-17	S3	Mif
4.16397e-22	0.413224	0.253	0.112	1.16583e-17	S3	Tkfc
6.01625e-22	0.408213	0.301	0.145	1.68443e-17	S3	Acot1
2.83794e-21	0.363624	0.369	0.192	7.94565e-17	S3	Acadm
4.54296e-21	0.357065	0.492	0.294	1.27194e-16	S3	Taldo1
4.98803e-21	0.344211	0.593	0.374	1.39655e-16	S3	Usp50
5.59284e-21	0.345713	0.389	0.212	1.56588e-16	S3	Zfos1
6.45431e-21	0.393518	0.412	0.231	1.80708e-16	S3	Smim1
7.79828e-21	0.388414	0.554	0.353	2.18336e-16	S3	Etfb
8.41635e-21	0.252088	0.917	0.787	2.35641e-16	S3	Cox6a1
2.07722e-20	0.367167	0.62	0.419	5.81579e-16	S3	Tmbim4
4.05156e-20	0.414559	0.319	0.165	1.13435e-15	S3	Rnf11
7.15371e-20	0.352972	0.318	0.162	2.0029e-15	S3	Slc6a6
1.9244e-19	0.338646	0.5	0.313	5.38794e-15	S3	Eno1
2.30674e-19	0.323877	0.677	0.466	6.4584e-15	S3	Ubc
2.49061e-19	0.382824	0.269	0.13	6.97321e-15	S3	4931406C07Rik
3.88355e-19	0.280769	0.265	0.124	1.08732e-14	S3	Pnpla2
4.62165e-19	0.333707	0.253	0.119	1.29397e-14	S3	Iah1
7.93818e-19	0.376459	0.333	0.179	2.22253e-14	S3	Tgtp1
9.51112e-19	0.255579	0.861	0.684	2.66292e-14	S3	Gpx4
1.69988e-18	0.327419	0.657	0.462	4.75932e-14	S3	Igtp
3.68133e-18	0.282754	0.769	0.565	1.0307e-13	S3	Vamp8
3.71493e-18	0.311252	0.571	0.372	1.04011e-13	S3	S100a10
4.79649e-18	0.301531	0.69	0.479	1.34292e-13	S3	Polr2l
1.26542e-17	0.307596	0.54	0.345	3.54292e-13	S3	Bnip3
1.47113e-17	0.312926	0.588	0.389	4.11886e-13	S3	Tmem258
1.8193e-17	0.284226	0.552	0.357	5.09367e-13	S3	Zfp706
1.98768e-17	0.362306	0.364	0.206	5.56511e-13	S3	Sephs2
2.64995e-17	0.291545	0.36	0.199	7.41933e-13	S3	C3
2.99196e-17	0.283734	0.418	0.245	8.37688e-13	S3	Uqcrc1
9.71276e-17	0.258713	0.253	0.125	2.71938e-12	S3	Fuca1
1.04909e-16	0.302742	0.424	0.252	2.93725e-12	S3	2200002D01Rik
1.22227e-16	0.388422	0.293	0.158	3.42212e-12	S3	Mat2a
1.36301e-16	0.323954	0.264	0.134	3.81615e-12	S3	Med21
3.0223e-16	0.329045	0.329	0.181	8.46185e-12	S3	Ethe1
3.56065e-16	0.329797	0.602	0.419	9.96912e-12	S3	Hint2
3.98753e-16	0.283898	0.583	0.398	1.11643e-11	S3	Sdc4
4.29723e-16	0.277971	0.576	0.375	1.20314e-11	S3	Ost4
4.55383e-16	0.261604	0.398	0.234	1.27498e-11	S3	Ddt
6.98427e-16	0.270406	0.548	0.36	1.95546e-11	S3	Tmem176b
1.28868e-15	0.353276	0.262	0.138	3.60804e-11	S3	Slc16a1
1.80499e-15	0.292299	0.401	0.24	5.05362e-11	S3	U2af1
2.8173e-15	0.263208	0.608	0.413	7.88786e-11	S3	Psmb3
3.5982e-15	0.274986	0.429	0.262	1.00742e-10	S3	Ucp2
3.82772e-15	0.295849	0.542	0.359	1.07169e-10	S3	Iscu
4.71191e-15	0.288485	0.272	0.144	1.31924e-10	S3	Hpn
5.5539e-15	0.298863	0.384	0.228	1.55498e-10	S3	Grpel1
9.81131e-15	0.287653	0.659	0.485	2.74697e-10	S3	Psap
2.07035e-14	0.312727	0.267	0.144	5.79658e-10	S3	Cyp4a31
4.57749e-14	0.264189	0.36	0.215	1.28161e-09	S3	Psma4
7.7058e-14	0.261708	0.468	0.301	2.15747e-09	S3	Pfdn2
7.81308e-14	0.275741	0.519	0.348	2.18751e-09	S3	Grina
1.11542e-13	0.296007	0.417	0.261	3.12295e-09	S3	Smpdl3a
1.26602e-13	0.297654	0.373	0.229	3.54459e-09	S3	Samhd1
1.39643e-13	0.252259	0.668	0.497	3.90972e-09	S3	Actg1
3.11169e-13	0.283611	0.309	0.177	8.71211e-09	S3	Psmd4
4.57573e-13	0.295881	0.412	0.264	1.28111e-08	S3	1110008F13Rik
5.47136e-13	0.252318	0.256	0.138	1.53187e-08	S3	Thoc7
1.67397e-12	0.257687	0.355	0.216	4.68678e-08	S3	Ndufs4
1.98829e-12	0.251522	0.279	0.158	5.56682e-08	S3	Pam16
6.00785e-12	0.257119	0.44	0.284	1.68208e-07	S3	Sdhb
6.29557e-10	0.25978	0.31	0.196	1.76263e-05	S3	Cd164
7.90072e-10	0.251608	0.282	0.176	2.21204e-05	S3	Rexo2
0	2.15549	0.714	0	0	S3T2	Serpina1f
0	1.29062	0.286	0	0	S3T2	Slc22a7
5.21134e-207	1.36077	0.286	0	1.45907e-202	S3T2	Sec14l3
1.19642e-155	1.45616	0.286	0	3.34973e-151	S3T2	Bcat1
1.83705e-155	0.638115	0.286	0	5.14337e-151	S3T2	Mep1b
1.01099e-124	1.21248	0.286	0.001	2.83058e-120	S3T2	Serpina1b
3.50019e-108	2.16212	0.429	0.002	9.79982e-104	S3T2	Serpina1d
1.97892e-89	1.13136	0.286	0.001	5.54058e-85	S3T2	Akr1c18
6.87697e-63	0.904357	0.286	0.002	1.92541e-58	S3T2	Serpina1a
8.30926e-39	2.33557	0.429	0.007	2.32643e-34	S3T2	Cyp7b1
1.29697e-36	1.63416	0.429	0.007	3.63124e-32	S3T2	Cyp2a4
4.328e-25	1.99218	0.571	0.02	1.21175e-20	S3T2	Cyp2d9
3.30612e-20	1.19264	0.429	0.014	9.25646e-16	S3T2	Slc7a13
3.55505e-20	0.608258	0.286	0.006	9.95344e-16	S3T2	Ace
2.22147e-18	1.31502	0.429	0.015	6.21966e-14	S3T2	Hao2
1.16109e-17	0.965747	0.429	0.016	3.25082e-13	S3T2	Pxmp2
1.36767e-17	1.52221	0.571	0.029	3.8292e-13	S3T2	Cubn
2.82597e-17	1.15342	0.286	0.007	7.91214e-13	S3T2	Agt
3.18561e-17	1.08622	0.286	0.007	8.91907e-13	S3T2	Dmgdh
1.31231e-15	1.30174	0.571	0.032	3.6742e-11	S3T2	Serpinf2
1.28787e-14	0.687219	0.286	0.009	3.60577e-10	S3T2	2500002B13Rik
3.25467e-14	0.590608	0.286	0.009	9.11243e-10	S3T2	Gramd1b
1.4457e-13	1.68063	0.429	0.021	4.04767e-09	S3T2	Stxbp6
2.89499e-13	0.980151	0.286	0.01	8.10538e-09	S3T2	Vill
3.46148e-13	1.50315	0.429	0.022	9.69146e-09	S3T2	Cbs
1.28969e-12	2.36745	0.857	0.099	3.61088e-08	S3T2	Mep1a
2.30578e-12	1.45997	0.429	0.024	6.45572e-08	S3T2	Acsm3
3.35691e-12	1.71113	0.429	0.024	9.39867e-08	S3T2	Galns
4.28579e-12	2.00316	0.571	0.044	1.19994e-07	S3T2	Mpv17l
2.53441e-11	1.34752	0.286	0.012	7.09585e-07	S3T2	Foxc1
8.73646e-11	0.933922	0.429	0.026	2.44603e-06	S3T2	Upb1
1.11641e-10	0.551231	0.286	0.012	3.12572e-06	S3T2	Tnfrsf1b
1.55175e-10	1.00809	0.429	0.027	4.34458e-06	S3T2	Osbpl1a
1.9306e-10	1.93223	0.857	0.122	5.40529e-06	S3T2	Ghr
4.18716e-10	1.60866	0.714	0.08	1.17232e-05	S3T2	Slc6a18
9.20076e-10	2.2289	0.571	0.057	2.57603e-05	S3T2	Ugt3a1
1.51165e-09	0.550427	0.286	0.014	4.23233e-05	S3T2	Pelp1
1.92845e-09	1.28117	0.429	0.031	5.39927e-05	S3T2	Hsd11b1
2.24698e-09	1.40285	0.714	0.085	6.2911e-05	S3T2	Grhpr
2.30516e-09	0.486338	0.286	0.014	6.45398e-05	S3T2	Mgat5
6.23405e-09	1.08089	0.429	0.033	0.000174541	S3T2	Klhl2
6.27351e-09	0.540986	0.286	0.015	0.000175646	S3T2	Bmp4
7.62898e-09	1.02628	0.286	0.015	0.000213596	S3T2	Soat1
9.23457e-09	1.2014	0.286	0.016	0.00025855	S3T2	Ppic
9.26289e-09	0.6584	0.429	0.032	0.000259342	S3T2	Serpina10
2.33951e-08	0.991298	0.429	0.035	0.000655016	S3T2	Papss2
2.931e-08	1.6669	0.429	0.037	0.00082062	S3T2	Gm15441
6.6793e-08	1.03839	0.286	0.017	0.00187007	S3T2	Gpm6a
7.0774e-08	0.928211	0.286	0.017	0.00198153	S3T2	Eci3
8.32254e-08	3.24681	0.714	0.126	0.00233014	S3T2	Napsa
1.22989e-07	1.31553	0.571	0.068	0.00344344	S3T2	Tmigd1
1.30642e-07	1.10847	0.429	0.039	0.00365772	S3T2	Itpa
2.17191e-07	1.06639	0.286	0.019	0.00608091	S3T2	Gle1
3.07955e-07	1.0944	0.286	0.019	0.00862213	S3T2	Nfxl1
3.43563e-07	2.0836	0.714	0.125	0.00961907	S3T2	Acy3
3.84116e-07	0.996889	0.286	0.019	0.0107545	S3T2	Cul2
3.85586e-07	0.612061	0.286	0.019	0.0107956	S3T2	Lancl1
8.46901e-07	1.02136	0.286	0.02	0.0237115	S3T2	Aqp1
1.23179e-06	0.596052	0.286	0.02	0.0344877	S3T2	Hgsnat
1.55376e-06	1.93073	0.857	0.199	0.0435023	S3T2	Lrg1
1.87048e-06	0.77374	0.286	0.021	0.0523697	S3T2	Hsd17b2
2.45683e-06	1.07658	0.286	0.022	0.0687863	S3T2	Ctbs
2.4746e-06	0.95893	0.286	0.022	0.069284	S3T2	Reep4
2.59467e-06	0.685647	0.286	0.022	0.0726456	S3T2	Sipa1l1
3.03749e-06	0.979484	0.286	0.022	0.0850437	S3T2	Kdm3b
3.63148e-06	0.894946	0.286	0.023	0.101674	S3T2	Hist1h4h
3.67845e-06	0.483212	0.286	0.022	0.102989	S3T2	Aph1c
4.15945e-06	1.43386	0.286	0.024	0.116456	S3T2	Aadat
4.65018e-06	1.36531	0.857	0.214	0.130196	S3T2	Calml4
6.53324e-06	1.16453	0.714	0.135	0.182918	S3T2	Ndufa10
7.98614e-06	0.881206	0.286	0.024	0.223596	S3T2	Ccpg1os
8.17587e-06	1.14026	0.571	0.088	0.228908	S3T2	Hdlbp
1.00332e-05	0.98589	0.286	0.025	0.280909	S3T2	Smpd2
1.06932e-05	0.774653	0.429	0.051	0.299387	S3T2	Sod3
1.0808e-05	0.977798	0.286	0.025	0.302603	S3T2	Arg2
1.31594e-05	1.33539	0.286	0.026	0.368436	S3T2	Pi4k2a
1.63475e-05	0.444864	0.286	0.025	0.457697	S3T2	Qprt
2.16055e-05	1.02495	0.286	0.027	0.60491	S3T2	Trps1
2.63085e-05	2.2122	1	0.63	0.736586	S3T2	Kap
2.66911e-05	0.424548	0.286	0.026	0.747299	S3T2	Clpb
3.41647e-05	1.1176	1	0.369	0.956543	S3T2	Scp2
3.66286e-05	1.6724	0.571	0.116	1	S3T2	Gstm1
3.67014e-05	1.01948	0.429	0.059	1	S3T2	Gss
4.1133e-05	1.15486	0.286	0.029	1	S3T2	Zbtb41
4.31983e-05	0.90637	0.429	0.058	1	S3T2	Slc5a8
4.33194e-05	0.752953	0.429	0.058	1	S3T2	Ebp
4.41747e-05	0.546185	0.429	0.056	1	S3T2	Nit2
5.79611e-05	0.452039	0.286	0.028	1	S3T2	Oxa1l
6.76652e-05	1.27744	0.286	0.031	1	S3T2	Slc3a1
7.2044e-05	2.19151	0.857	0.366	1	S3T2	Slc27a2
7.28331e-05	0.909622	0.286	0.029	1	S3T2	Zfp865
7.44823e-05	1.27885	0.286	0.031	1	S3T2	Mob2
7.61049e-05	0.446178	0.286	0.029	1	S3T2	Tmem115
8.43997e-05	1.06806	0.571	0.107	1	S3T2	C1qbp
9.62071e-05	0.915992	0.286	0.03	1	S3T2	Amz2
9.82858e-05	0.911367	0.429	0.063	1	S3T2	Nqo1
0.000103253	0.908662	0.286	0.031	1	S3T2	Tlcd1
0.000105194	0.937349	0.286	0.031	1	S3T2	Vps13d
0.000111583	0.833218	0.286	0.031	1	S3T2	Mccc2
0.000111855	0.897946	0.429	0.063	1	S3T2	Slc19a1
0.000112579	0.959675	0.429	0.065	1	S3T2	Fmo1
0.000134003	1.0218	0.286	0.032	1	S3T2	Ackr3
0.000142044	0.535783	0.286	0.031	1	S3T2	Abhd4
0.00015167	0.432041	0.286	0.031	1	S3T2	N6amt2
0.000166743	0.615713	0.429	0.064	1	S3T2	Entpd5
0.000183975	0.917124	0.286	0.033	1	S3T2	BC021785
0.000185303	1.12359	0.429	0.069	1	S3T2	BC026585
0.000189992	1.1307	0.429	0.071	1	S3T2	Cnot6
0.000196034	0.982484	0.286	0.033	1	S3T2	Fbxw9
0.000197261	0.910509	0.286	0.033	1	S3T2	Upf2
0.000207053	0.534841	0.286	0.032	1	S3T2	N6amt1
0.000226492	1.30512	0.857	0.303	1	S3T2	Gclm
0.000228892	0.807023	0.429	0.068	1	S3T2	Snw1
0.000229064	0.527335	0.286	0.032	1	S3T2	Rbfa
0.000238174	1.28227	0.286	0.035	1	S3T2	Cops8
0.00024335	0.434962	0.286	0.032	1	S3T2	Psen1
0.000257921	0.87089	0.286	0.034	1	S3T2	Mrpl45
0.000260471	0.465598	0.429	0.065	1	S3T2	Apmap
0.000283788	1.16542	0.571	0.127	1	S3T2	Abcg2
0.000313697	0.928401	0.571	0.114	1	S3T2	Pdcl3
0.00031473	0.805175	0.286	0.034	1	S3T2	Bscl2
0.000314908	0.888268	0.286	0.035	1	S3T2	Ppp1r37
0.000360653	0.371386	0.286	0.034	1	S3T2	Dctn1
0.0003614	0.411263	0.286	0.034	1	S3T2	Vta1
0.000393339	1.39268	0.286	0.038	1	S3T2	Xpr1
0.000415433	0.816292	0.429	0.072	1	S3T2	Smim12
0.000458249	1.38782	0.857	0.442	1	S3T2	Hrsp12
0.000486219	0.39581	0.286	0.035	1	S3T2	Slc25a33
0.000524221	1.39423	0.286	0.038	1	S3T2	Syvn1
0.000546506	0.802977	0.429	0.075	1	S3T2	Mcfd2
0.000548398	1.04504	0.286	0.037	1	S3T2	Pdk3
0.000571122	1.35203	0.286	0.039	1	S3T2	Ctps2
0.000574496	1.09797	0.286	0.038	1	S3T2	Fam25c
0.000580342	0.404211	0.286	0.036	1	S3T2	Mrto4
0.000591384	1.17285	0.429	0.083	1	S3T2	Cd36
0.000636554	0.515181	0.286	0.037	1	S3T2	Hmbs
0.000720286	1.13736	0.286	0.039	1	S3T2	Defb29
0.000767235	0.79208	0.429	0.077	1	S3T2	Crim1
0.000772076	0.765523	0.286	0.038	1	S3T2	Mfsd2a
0.000788309	1.17928	0.286	0.041	1	S3T2	Pcyox1
0.000811106	0.48145	0.286	0.037	1	S3T2	Rhot2
0.00083647	0.960328	0.286	0.04	1	S3T2	Oaf
0.000863687	0.963101	0.571	0.14	1	S3T2	Ldhd
0.000875128	0.875268	0.429	0.081	1	S3T2	Hsd17b4
0.000884209	0.877115	0.286	0.04	1	S3T2	Scamp2
0.00090699	1.22585	0.429	0.086	1	S3T2	Mrpl13
0.000943799	0.879357	0.286	0.04	1	S3T2	Aifm1
0.000961429	0.448824	0.429	0.076	1	S3T2	Cops5
0.00097638	0.848117	0.286	0.04	1	S3T2	Chdh
0.00102411	0.77499	0.286	0.04	1	S3T2	Dnajc30
0.0010469	0.886574	0.286	0.041	1	S3T2	Clock
0.0010549	1.16935	0.286	0.042	1	S3T2	Ddi2
0.00107092	0.857037	0.286	0.04	1	S3T2	Mettl23
0.00108343	1.34668	0.429	0.089	1	S3T2	Cpd
0.00111129	0.861732	0.286	0.041	1	S3T2	G6pdx
0.00114746	0.934638	0.286	0.041	1	S3T2	Gnl1
0.00120223	1.19723	0.286	0.044	1	S3T2	Slc30a1
0.00125704	0.383638	0.286	0.039	1	S3T2	Ikbkg
0.00133631	0.30802	0.286	0.039	1	S3T2	Abhd14b
0.00134532	0.394664	0.286	0.04	1	S3T2	Ddx1
0.00147291	0.380628	0.286	0.04	1	S3T2	Bloc1s4
0.00148753	0.8489	0.286	0.043	1	S3T2	Gstz1
0.00149503	0.832272	0.286	0.042	1	S3T2	Tomm40
0.00150767	0.98944	0.429	0.09	1	S3T2	Fah
0.00159912	0.861441	0.571	0.142	1	S3T2	Atp11a
0.00160304	0.490892	0.286	0.041	1	S3T2	Aldh9a1
0.00162026	0.782914	0.286	0.042	1	S3T2	Osgin1
0.00168373	0.772098	0.429	0.085	1	S3T2	2610507B11Rik
0.00180729	0.740669	0.429	0.086	1	S3T2	Me1
0.00182916	0.832288	0.286	0.044	1	S3T2	Acat2
0.00187746	1.08371	0.429	0.092	1	S3T2	Flot1
0.00198208	1.15573	0.286	0.047	1	S3T2	Dnajb4
0.00199521	0.894328	0.286	0.044	1	S3T2	Keg1
0.00207706	0.755263	0.714	0.205	1	S3T2	Rab2a
0.00208153	0.517794	0.286	0.043	1	S3T2	P2rx4
0.00214931	0.665619	0.286	0.044	1	S3T2	Slc35b1
0.0021759	0.322622	0.286	0.042	1	S3T2	Retsat
0.00218685	0.612973	0.286	0.044	1	S3T2	Slc27a1
0.00219276	0.819632	0.714	0.222	1	S3T2	Aplp2
0.00228593	0.374537	0.286	0.043	1	S3T2	Tmem107
0.00255432	0.950697	1	0.51	1	S3T2	Sult1d1
0.00256197	0.898557	0.286	0.046	1	S3T2	Trim2
0.00262461	1.08062	0.286	0.047	1	S3T2	Slmap
0.00264917	1.02932	0.571	0.161	1	S3T2	Cryab
0.00293621	0.455097	0.286	0.045	1	S3T2	Rbm4b
0.00293621	0.369844	0.286	0.045	1	S3T2	Aadac
0.00298898	1.14167	0.286	0.05	1	S3T2	Srm
0.00299193	1.01765	0.286	0.049	1	S3T2	Mul1
0.00303866	1.05723	0.571	0.158	1	S3T2	Dph3
0.00306508	0.80702	0.429	0.093	1	S3T2	Slc25a17
0.00311721	0.489132	0.429	0.088	1	S3T2	Oplah
0.00313123	0.332447	0.286	0.044	1	S3T2	Tcp11l1
0.00321813	1.03077	0.286	0.048	1	S3T2	Cept1
0.00339014	0.824583	0.286	0.048	1	S3T2	Lyrm5
0.00339263	0.870549	0.286	0.048	1	S3T2	Mtx1
0.00343032	0.574691	0.429	0.091	1	S3T2	Samm50
0.00351623	0.861574	0.286	0.048	1	S3T2	Fut9
0.00373138	0.868418	0.286	0.048	1	S3T2	Wdfy3
0.00375625	0.901374	0.429	0.096	1	S3T2	Pdzk1
0.00375794	1.20131	0.286	0.052	1	S3T2	2020-03-07
0.0038094	0.873191	0.429	0.095	1	S3T2	Phf5a
0.00386706	0.839675	0.286	0.049	1	S3T2	Ahcyl1
0.00389305	0.825053	0.429	0.1	1	S3T2	Prosc
0.00395802	0.926788	0.429	0.099	1	S3T2	Dhrs4
0.00398404	1.05152	0.429	0.105	1	S3T2	Ctsh
0.00403224	0.546929	0.286	0.048	1	S3T2	Cideb
0.00411986	0.981708	0.286	0.049	1	S3T2	Cmc2
0.00425569	0.443005	0.286	0.047	1	S3T2	Dr1
0.00426999	1.17742	0.286	0.053	1	S3T2	Actr10
0.00430282	1.20308	0.286	0.051	1	S3T2	Fam8a1
0.00435882	1.1499	0.429	0.112	1	S3T2	Psmc6
0.00439859	0.935167	0.429	0.101	1	S3T2	Sys1
0.00445602	0.689227	0.571	0.157	1	S3T2	Sypl
0.00449116	0.761757	0.571	0.163	1	S3T2	Ccdc107
0.00471481	0.890069	0.857	0.515	1	S3T2	Igfbp7
0.00501956	0.849538	0.286	0.051	1	S3T2	Mpdu1
0.00510672	0.813524	0.286	0.051	1	S3T2	Slc5a10
0.00518438	1.27616	0.571	0.221	1	S3T2	Cyp4a10
0.00518459	0.356257	0.429	0.092	1	S3T2	Kdelr2
0.00529251	0.738229	0.429	0.102	1	S3T2	Get4
0.00540791	1.09277	0.286	0.055	1	S3T2	Sgta
0.00544266	0.763383	0.429	0.103	1	S3T2	Smagp
0.00558259	0.794158	0.286	0.051	1	S3T2	Hspa13
0.00561868	1.02399	0.571	0.175	1	S3T2	Mat2a
0.00563079	0.723578	0.286	0.051	1	S3T2	Snrpa
0.0056967	1.3522	0.571	0.215	1	S3T2	Acadm
0.00576858	0.938156	0.429	0.11	1	S3T2	Ggt1
0.00578768	0.347472	0.286	0.049	1	S3T2	Tmed3
0.00583772	0.522082	0.429	0.099	1	S3T2	Acads
0.00587752	1.06642	0.429	0.119	1	S3T2	Zbtb20
0.00597255	1.27124	0.286	0.057	1	S3T2	Uba3
0.00630673	1.17948	0.429	0.122	1	S3T2	Ugdh
0.00644988	1.0423	0.429	0.118	1	S3T2	Anxa4
0.00655083	0.858638	0.714	0.322	1	S3T2	Pfdn2
0.00656023	0.760348	0.571	0.164	1	S3T2	Tmem205
0.0068446	0.414916	0.286	0.051	1	S3T2	Zswim7
0.00687631	0.803865	0.429	0.103	1	S3T2	Prmt1
0.00688976	0.935914	0.429	0.11	1	S3T2	Cd302
0.00692023	0.986203	0.429	0.114	1	S3T2	D17Wsu92e
0.00700913	0.313541	0.286	0.051	1	S3T2	Emc8
0.00714466	0.274152	0.286	0.05	1	S3T2	Cox16
0.00715169	0.705283	0.286	0.053	1	S3T2	B230118H07Rik
0.00720258	1.31327	0.571	0.182	1	S3T2	Slc6a6
0.00729461	1.10776	0.571	0.199	1	S3T2	Herpud1
0.00748685	0.808416	0.714	0.27	1	S3T2	Ppp1ca
0.00755779	0.761788	0.286	0.055	1	S3T2	Eif4a3
0.00765028	0.93094	0.571	0.176	1	S3T2	Slc17a1
0.00766168	1.14886	0.857	0.507	1	S3T2	Psap
0.00772298	1.0316	0.286	0.059	1	S3T2	Slc22a18
0.0077503	0.926454	0.429	0.119	1	S3T2	Nfia
0.0077959	1.05877	0.286	0.059	1	S3T2	2310011J03Rik
0.00779959	0.951387	1	0.979	1	S3T2	mt-Nd1
0.00783879	1.32421	0.429	0.132	1	S3T2	Eif4g1
0.00787272	0.753409	0.429	0.108	1	S3T2	Hoga1
0.00794411	0.269171	0.286	0.051	1	S3T2	Ppcs
0.0082461	0.864992	0.571	0.18	1	S3T2	Havcr1
0.0084253	1.35307	0.429	0.128	1	S3T2	Ttc36
0.00848961	1.75823	0.571	0.219	1	S3T2	Saa2
0.00852227	0.779419	0.286	0.056	1	S3T2	Aldh4a1
0.00856641	0.679859	0.429	0.108	1	S3T2	Mrps18b
0.00865058	0.474347	0.286	0.054	1	S3T2	Vnn1
0.00868719	0.817526	0.286	0.057	1	S3T2	Slc18a1
0.0087041	0.720423	0.571	0.177	1	S3T2	Rnh1
0.00872081	0.886432	0.429	0.115	1	S3T2	Gpi1
0.00873899	0.259347	0.286	0.052	1	S3T2	Commd9
0.00881991	0.293374	0.429	0.099	1	S3T2	Rchy1
0.00885795	0.703764	0.286	0.056	1	S3T2	Coa6
0.0088947	0.312256	0.286	0.053	1	S3T2	Dhx40
0.0089046	0.687233	0.286	0.056	1	S3T2	Wdr18
0.00898369	0.268969	0.286	0.053	1	S3T2	Cml1
0.00900092	0.823978	0.571	0.195	1	S3T2	Polr2f
0.00909503	0.877949	0.429	0.116	1	S3T2	Crb3
0.00937444	0.759337	0.286	0.057	1	S3T2	Cul1
0.00944928	0.776514	0.286	0.057	1	S3T2	Yipf6
0.00994588	0.747392	0.571	0.177	1	S3T2	Mrps16
0.00998806	0.840211	0.571	0.184	1	S3T2	0610011F06Rik
0	2.34739	0.952	0.395	0	LOH	Umod
4.61973e-285	1.92269	0.418	0.025	1.29343e-280	LOH	Slc12a1
2.3382e-267	1.55783	0.97	0.684	6.54651e-263	LOH	Mt2
3.07524e-255	1.43864	0.98	0.725	8.61007e-251	LOH	Lcn2
2.6691e-251	1.18891	0.999	0.959	7.47293e-247	LOH	Mt1
2.84255e-199	1.11706	0.962	0.56	7.95857e-195	LOH	Defb1
1.22165e-173	0.722421	1	0.997	3.42038e-169	LOH	Spp1
1.41269e-158	1.5083	0.514	0.128	3.95526e-154	LOH	Wfdc15b
1.5581e-134	1.57115	0.34	0.058	4.36236e-130	LOH	Cldn10
3.95723e-118	1.42376	0.376	0.085	1.10795e-113	LOH	Slc5a3
1.67262e-114	0.807284	0.999	0.999	4.683e-110	LOH	mt-Co1
2.03786e-113	0.627786	0.973	0.867	5.70561e-109	LOH	Ly6a
2.22319e-101	0.762381	0.887	0.731	6.22448e-97	LOH	Tsc22d1
5.62596e-99	1.24858	0.427	0.134	1.57516e-94	LOH	Mrps6
3.44584e-95	1.3712	0.452	0.149	9.64765e-91	LOH	Egf
6.40641e-90	1.0055	0.599	0.275	1.79367e-85	LOH	Cd24a
9.62167e-72	0.527858	1	0.999	2.69387e-67	LOH	mt-Atp6
1.0405e-70	1.08483	0.532	0.282	2.91319e-66	LOH	Gclc
3.16705e-66	0.977607	0.408	0.16	8.86711e-62	LOH	Epcam
6.70803e-64	0.982421	0.271	0.073	1.87812e-59	LOH	Ctsc
1.21364e-60	0.572917	0.946	0.911	3.39795e-56	LOH	mt-Co2
1.93108e-59	0.473981	0.988	0.991	5.40663e-55	LOH	mt-Co3
2.5341e-56	0.879869	0.434	0.197	7.09498e-52	LOH	Kng2
1.36517e-52	1.00397	0.28	0.093	3.8222e-48	LOH	Ppp1r1a
1.4974e-51	0.592408	0.879	0.823	4.19242e-47	LOH	mt-Nd4
1.98478e-47	0.444122	0.982	0.972	5.55698e-43	LOH	mt-Cytb
1.69944e-44	0.407907	0.984	0.979	4.75808e-40	LOH	mt-Nd1
1.52461e-39	0.397843	0.766	0.604	4.26861e-35	LOH	Atp1b1
7.70086e-26	0.409744	0.793	0.705	2.15609e-21	LOH	mt-Nd2
1.24785e-22	0.357036	0.623	0.471	3.49374e-18	LOH	Tmem213
1.00209e-21	0.606732	0.309	0.176	2.80566e-17	LOH	Ly6c1
2.50162e-21	0.620295	0.439	0.322	7.00404e-17	LOH	Ivns1abp
3.52504e-21	0.626663	0.72	0.671	9.86942e-17	LOH	Malat1
8.31041e-20	0.378751	0.667	0.585	2.32675e-15	LOH	Atp1a1
1.29132e-19	0.637781	0.415	0.3	3.61543e-15	LOH	Gadd45g
6.20514e-19	0.740449	0.382	0.279	1.73731e-14	LOH	Nampt
4.55727e-18	0.477104	0.412	0.281	1.27594e-13	LOH	Wfdc2
1.48942e-16	0.683505	0.264	0.16	4.17008e-12	LOH	Paqr5
1.52809e-16	0.265616	0.951	0.926	4.27836e-12	LOH	Fxyd2
9.806e-15	0.365996	0.641	0.585	2.74548e-10	LOH	mt-Nd5
1.79267e-14	0.439354	0.565	0.516	5.01913e-10	LOH	Irf7
6.24703e-13	0.328226	0.699	0.675	1.74904e-08	LOH	H2-K1
1.9003e-11	0.547867	0.301	0.214	5.32046e-07	LOH	Ifit3
4.24091e-11	0.304683	0.671	0.661	1.18737e-06	LOH	Mpc1
6.68496e-10	0.584491	0.298	0.226	1.87166e-05	LOH	Ifit1
2.01491e-08	0.445446	0.282	0.208	0.000564134	LOH	Cdh1
4.51389e-08	0.354464	0.419	0.365	0.0012638	LOH	Isg15
1.03535e-07	0.444962	0.412	0.378	0.00289877	LOH	Spint2
1.68532e-07	0.418516	0.429	0.395	0.00471857	LOH	Tapbp
1.39058e-05	0.480112	0.313	0.277	0.389334	LOH	Acadl
1.74519e-05	0.463545	0.31	0.274	0.488617	LOH	Vmp1
0.000181746	0.305642	0.41	0.402	1	LOH	Txnip
0.000229428	0.331192	0.419	0.415	1	LOH	Zfp36l1
0.000358676	0.378828	0.336	0.322	1	LOH	Gbp3
0.000524838	0.333161	0.408	0.401	1	LOH	Id2
0.00289223	0.327963	0.346	0.335	1	LOH	Cd47
5.88694e-188	1.41915	0.388	0.019	1.64823e-183	CNT	Trpv5
1.18316e-156	1.74789	0.705	0.109	3.3126e-152	CNT	Tmem52b
1.14513e-133	2.6332	1	0.629	3.20613e-129	CNT	S100g
4.42174e-128	2.63683	0.96	0.463	1.238e-123	CNT	Klk1
1.85854e-113	1.89977	0.789	0.218	5.20353e-109	CNT	Calb1
7.20449e-102	1.55765	0.991	0.528	2.01711e-97	CNT	Clu
1.33711e-94	1.15021	0.37	0.042	3.74364e-90	CNT	Abca13
6.73693e-91	1.28147	0.982	0.611	1.88621e-86	CNT	Atp1b1
9.83621e-89	1.27695	0.511	0.091	2.75394e-84	CNT	Scd2
2.18301e-86	1.39056	0.485	0.086	6.11198e-82	CNT	Kl
1.40476e-79	1.1398	0.401	0.061	3.93304e-75	CNT	Pgam2
7.17564e-70	0.908432	0.564	0.128	2.00903e-65	CNT	Cd200
3.52379e-66	1.09072	0.361	0.059	9.86592e-62	CNT	Ltc4s
3.9818e-64	1.18409	0.449	0.095	1.11483e-59	CNT	Hoxd8
7.13778e-64	0.810741	1	0.817	1.99844e-59	CNT	Itm2b
2.53372e-62	0.822522	0.991	0.877	7.0939e-58	CNT	Ly6a
4.27523e-60	1.41273	0.524	0.141	1.19698e-55	CNT	Pth1r
6.35024e-60	1.19689	0.507	0.129	1.77794e-55	CNT	Sgms2
1.79893e-58	1.05012	0.881	0.475	5.03665e-54	CNT	Tmem213
6.36441e-55	0.995798	0.374	0.074	1.78191e-50	CNT	Cdo1
1.74818e-54	0.985739	0.921	0.582	4.89457e-50	CNT	Atp1a1
4.07578e-54	0.987511	0.74	0.28	1.14114e-49	CNT	Wfdc2
1.26937e-53	1.02354	0.427	0.096	3.55399e-49	CNT	Tacstd2
9.6834e-52	1.18599	0.78	0.388	2.71116e-47	CNT	Ctsd
3.74692e-48	0.812247	0.251	0.038	1.04906e-43	CNT	Tspan1
1.27185e-47	0.895125	0.392	0.09	3.56093e-43	CNT	Clcnkb
1.38423e-47	1.15178	0.463	0.131	3.87558e-43	CNT	Wnk1
2.81324e-47	0.915959	0.278	0.048	7.87651e-43	CNT	Tmem178
1.92754e-43	0.853804	0.833	0.427	5.39674e-39	CNT	Serinc3
2.5332e-38	0.868998	0.432	0.126	7.09245e-34	CNT	Mal
1.53946e-37	0.791915	0.877	0.539	4.31018e-33	CNT	Ly6e
1.79101e-34	0.792614	0.573	0.216	5.01447e-30	CNT	Kng2
1.94621e-34	0.5294	0.943	0.604	5.449e-30	CNT	Defb1
2.26895e-34	0.849284	0.758	0.401	6.3526e-30	CNT	Sh3bgrl3
4.68668e-33	0.847326	0.344	0.095	1.31218e-28	CNT	Wsb1
3.49232e-31	0.775649	0.577	0.241	9.77779e-27	CNT	Ezr
1.33737e-30	0.785361	0.515	0.204	3.74436e-26	CNT	Cdh16
2.8892e-28	0.80096	0.388	0.133	8.08918e-24	CNT	Wls
3.0061e-28	0.789433	0.515	0.218	8.41649e-24	CNT	Atp6v1a
2.03497e-27	0.816564	0.568	0.273	5.6975e-23	CNT	Pnp
1.35802e-26	0.723525	0.502	0.205	3.80217e-22	CNT	Cdh1
2.65583e-26	0.820018	0.348	0.113	7.4358e-22	CNT	Tspan8
3.94405e-26	0.726027	0.251	0.066	1.10426e-21	CNT	Zfp503
4.56647e-26	0.744756	0.295	0.084	1.27852e-21	CNT	Scnn1a
5.92025e-26	0.655193	0.322	0.097	1.65755e-21	CNT	Aif1l
1.26006e-23	0.660107	0.551	0.251	3.5279e-19	CNT	Pkm
1.29816e-23	0.726706	0.463	0.192	3.63459e-19	CNT	Nudt4
2.21827e-22	0.734978	0.295	0.095	6.21072e-18	CNT	Ier3
2.96047e-22	0.74972	0.273	0.084	8.28872e-18	CNT	Krt7
5.58069e-22	0.697123	0.392	0.154	1.56248e-17	CNT	Kcnj16
1.48063e-21	0.679228	0.978	0.98	4.14548e-17	CNT	mt-Nd1
1.51605e-21	0.620707	0.335	0.117	4.24464e-17	CNT	Hes1
2.12104e-21	0.813616	0.33	0.12	5.93847e-17	CNT	Tfcp2l1
6.35006e-21	0.664122	0.414	0.173	1.77789e-16	CNT	Pycard
2.79599e-20	0.520811	0.841	0.61	7.82821e-16	CNT	S100a1
7.32593e-20	0.631011	0.291	0.099	2.05111e-15	CNT	Pmepa1
1.59304e-19	0.620737	0.282	0.096	4.4602e-15	CNT	Rnf128
3.91215e-19	0.633037	0.581	0.328	1.09532e-14	CNT	Ivns1abp
5.83389e-19	0.630943	0.449	0.211	1.63337e-14	CNT	Aplp2
1.34364e-18	0.50127	1	0.999	3.76193e-14	CNT	mt-Co1
3.98368e-18	0.529573	1	0.999	1.11535e-13	CNT	mt-Atp6
7.01677e-18	0.263991	1	0.997	1.96456e-13	CNT	Spp1
6.19792e-17	0.622356	0.291	0.108	1.73529e-12	CNT	Cldn7
6.81308e-17	0.585809	0.269	0.097	1.90753e-12	CNT	Itga6
3.05711e-14	0.62926	0.269	0.109	8.5593e-10	CNT	Clint1
4.93695e-14	0.53591	0.295	0.124	1.38225e-09	CNT	Aqp2
2.97419e-13	0.50845	0.264	0.106	8.32713e-09	CNT	Wwc1
9.87825e-13	0.627157	0.388	0.197	2.76571e-08	CNT	Slc12a3
1.15597e-12	0.547911	0.361	0.174	3.23647e-08	CNT	Pgrmc1
5.33195e-12	0.39198	0.903	0.828	1.49284e-07	CNT	mt-Nd4
6.42778e-12	0.368406	0.952	0.929	1.79965e-07	CNT	Fxyd2
8.69374e-12	0.38473	0.987	0.99	2.43407e-07	CNT	mt-Co3
2.28272e-11	0.637621	0.286	0.136	6.39115e-07	CNT	F11r
2.85108e-11	0.469425	0.282	0.127	7.98246e-07	CNT	Ptp4a2
5.61922e-11	0.312635	0.551	0.312	1.57327e-06	CNT	Cd24a
2.20689e-10	0.488305	0.251	0.113	6.17885e-06	CNT	Nfe2l1
2.26463e-10	0.550682	0.313	0.159	6.34051e-06	CNT	Tap1
2.7825e-10	0.496154	0.322	0.165	7.79045e-06	CNT	Ptbp3
7.38099e-10	0.356036	0.978	0.973	2.06653e-05	CNT	mt-Cytb
2.01715e-09	0.38999	0.93	0.916	5.64762e-05	CNT	mt-Co2
2.03142e-09	0.304941	0.458	0.267	5.68757e-05	CNT	Lgals3
2.24801e-09	0.445959	0.269	0.13	6.29398e-05	CNT	Map3k1
2.46652e-09	0.491918	0.269	0.131	6.90577e-05	CNT	Stat1
1.0899e-08	0.464922	0.264	0.134	0.000305151	CNT	Rnaset2a
1.17961e-08	0.536409	0.256	0.131	0.000330267	CNT	Abhd2
1.18774e-08	0.445047	0.308	0.168	0.000332544	CNT	Erbb2ip
1.36105e-08	0.347595	0.595	0.435	0.000381066	CNT	Neat1
2.26236e-08	0.369187	0.568	0.392	0.000633415	CNT	Tapbp
3.13144e-08	0.430128	0.313	0.169	0.000876741	CNT	Paqr5
3.80264e-08	0.479136	0.3	0.168	0.00106466	CNT	Aco2
5.34442e-08	0.435638	0.361	0.215	0.00149633	CNT	Cpt1a
5.71095e-08	0.397387	0.564	0.394	0.00159895	CNT	Id2
9.91348e-08	0.339662	0.48	0.313	0.00277557	CNT	Cd9
2.39622e-07	0.455816	0.26	0.141	0.00670893	CNT	Rbbp7
1.77519e-06	0.307631	0.551	0.396	0.0497017	CNT	Txnip
2.2425e-06	0.33436	0.643	0.537	0.0627856	CNT	Cox7b
5.8224e-06	0.332001	0.348	0.22	0.163016	CNT	Itgav
9.56072e-06	0.323666	0.48	0.346	0.267681	CNT	Hsp90ab1
1.08413e-05	0.385056	0.256	0.151	0.303534	CNT	Tns1
1.90446e-05	0.296989	0.626	0.52	0.53321	CNT	Atp6v1f
2.18189e-05	0.265852	0.568	0.416	0.610885	CNT	Sdc4
3.01511e-05	0.321395	0.326	0.208	0.844169	CNT	Ctnna1
3.17138e-05	0.323932	0.282	0.176	0.887922	CNT	Nenf
3.3185e-05	0.276216	0.608	0.483	0.929114	CNT	Atp5a1
3.89171e-05	0.348595	0.313	0.203	1	CNT	Ptp4a1
4.52526e-05	0.258333	0.771	0.715	1	CNT	mt-Nd2
5.11137e-05	0.36198	0.396	0.28	1	CNT	mt-Nd4l
7.0051e-05	0.253874	0.454	0.331	1	CNT	Cd47
0.000111337	0.394272	0.322	0.221	1	CNT	Ctnnb1
0.000143849	0.271302	0.304	0.198	1	CNT	Stat3
0.000164432	0.386864	0.264	0.173	1	CNT	Acsl4
0.000172775	0.257387	0.515	0.396	1	CNT	Ndufs5
0.000240225	0.254509	0.639	0.518	1	CNT	Irf7
0.000254648	0.303901	0.405	0.304	1	CNT	Sdha
0.000304161	0.335202	0.374	0.277	1	CNT	Smpdl3a
0.000359574	0.291555	0.308	0.215	1	CNT	Naa38
0.000385473	0.325509	0.26	0.171	1	CNT	Rnaset2b
0.000457944	0.277613	0.454	0.35	1	CNT	Ghitm
0.000667921	0.291063	0.273	0.187	1	CNT	Rbm47
0.000825914	0.263728	0.313	0.22	1	CNT	mt-Nd3
0.00254678	0.252142	0.256	0.18	1	CNT	Rab10
0.00347004	0.29517	0.278	0.206	1	CNT	Sec62
0	2.1997	0.77	0.115	0	DCT	Slc12a3
1.65215e-218	1.54895	0.425	0.046	4.62568e-214	DCT	Ptgfr
2.06731e-198	1.21642	0.93	0.488	5.78805e-194	DCT	Clu
4.1795e-175	1.17722	0.88	0.432	1.17018e-170	DCT	Tmem213
9.68072e-167	1.03985	0.946	0.567	2.71041e-162	DCT	Defb1
1.5691e-140	1.0238	0.874	0.553	4.39317e-136	DCT	Atp1a1
3.05655e-131	1.59581	0.575	0.191	8.55774e-127	DCT	Calb1
3.32507e-131	0.701406	0.987	0.866	9.30954e-127	DCT	Ly6a
1.21614e-112	0.843994	0.876	0.588	3.40494e-108	DCT	Atp1b1
2.4426e-111	1.15428	0.499	0.145	6.83879e-107	DCT	Egf
1.32276e-110	1.09399	0.551	0.182	3.70346e-106	DCT	Kng2
8.86058e-90	1.10026	0.671	0.364	2.48079e-85	DCT	Ctsd
5.72947e-84	1.0792	0.321	0.077	1.60414e-79	DCT	Scd2
3.55884e-83	0.535225	0.959	0.916	9.96403e-79	DCT	Cox6c
3.92414e-83	0.626632	0.978	0.922	1.09868e-78	DCT	Fxyd2
5.43915e-80	0.935721	0.54	0.221	1.52285e-75	DCT	Pkm
1.50698e-75	0.948306	0.359	0.101	4.21924e-71	DCT	Tmem52b
9.82496e-74	0.995889	0.346	0.099	2.75079e-69	DCT	Pigr
1.13421e-73	0.711398	0.845	0.683	3.17557e-69	DCT	Ndufa1
3.39774e-72	1.0945	0.318	0.088	9.51298e-68	DCT	Mmd
1.06565e-68	0.533257	0.99	0.961	2.98361e-64	DCT	Mt1
1.22591e-66	0.985095	0.406	0.148	3.4323e-62	DCT	Pycard
1.02218e-65	0.662358	0.889	0.743	2.86189e-61	DCT	Lcn2
2.9274e-63	0.824438	0.552	0.261	8.19615e-59	DCT	Wfdc2
3.19689e-63	0.93813	0.281	0.076	8.95064e-59	DCT	Clcnkb
2.86443e-59	0.651911	0.783	0.594	8.01982e-55	DCT	S100a1
7.41227e-58	0.678609	0.671	0.409	2.07529e-53	DCT	Serinc3
1.47493e-57	0.846382	0.439	0.183	4.12952e-53	DCT	Cdh1
7.21436e-57	0.28527	0.728	0.438	2.01988e-52	DCT	Umod
2.95753e-56	0.462765	0.93	0.808	8.2805e-52	DCT	Itm2b
2.92748e-52	0.756688	0.296	0.093	8.19637e-48	DCT	Ppp1r1a
7.76369e-51	0.481319	0.908	0.853	2.17368e-46	DCT	Cox8a
4.74329e-50	0.901168	0.253	0.076	1.32803e-45	DCT	Socs2
1.97774e-49	0.959779	0.66	0.458	5.53727e-45	DCT	Klk1
8.32317e-49	0.473392	0.862	0.705	2.33032e-44	DCT	Mt2
6.0034e-47	0.352386	1	0.997	1.68083e-42	DCT	Spp1
6.83519e-44	0.57381	0.813	0.706	1.91372e-39	DCT	Atp5g1
2.30617e-43	0.535884	0.551	0.286	6.45682e-39	DCT	Cd24a
1.02009e-42	0.750985	0.369	0.156	2.85606e-38	DCT	Wfdc15b
1.93284e-42	0.607363	0.384	0.166	5.41155e-38	DCT	Ly6c1
1.01627e-40	0.49973	0.621	0.385	2.84536e-36	DCT	Sh3bgrl3
2.42195e-40	0.913057	0.3	0.122	6.78097e-36	DCT	Wnk1
1.14085e-39	0.37407	0.927	0.877	3.19416e-35	DCT	Cox4i1
1.06291e-36	0.795093	0.296	0.123	2.97594e-32	DCT	Sgms2
4.27897e-36	0.611765	0.671	0.521	1.19803e-31	DCT	Cox7b
3.52216e-35	0.520077	0.748	0.64	9.86135e-31	DCT	Atp5k
3.95406e-35	0.419976	0.609	0.413	1.10706e-30	DCT	Ifitm2
9.71991e-35	0.437041	0.836	0.741	2.72138e-30	DCT	Cox5b
1.54046e-34	0.544146	0.709	0.567	4.31299e-30	DCT	Ndufc1
2.56987e-32	0.418208	0.842	0.773	7.19513e-28	DCT	Atp5j
8.51148e-31	0.368495	0.734	0.526	2.38305e-26	DCT	Ly6e
8.55281e-31	0.408851	0.859	0.801	2.39461e-26	DCT	Atp5e
3.6147e-27	0.590884	0.271	0.119	1.01204e-22	DCT	Mal
4.26869e-27	0.435272	0.259	0.107	1.19515e-22	DCT	Slc5a3
2.30448e-26	0.532731	0.319	0.155	6.45207e-22	DCT	Mrps6
2.38558e-26	0.398881	0.859	0.809	6.67914e-22	DCT	Usmg5
2.99418e-25	0.306617	0.895	0.824	8.38311e-21	DCT	Uqcrq
3.27229e-25	0.421602	0.71	0.577	9.16175e-21	DCT	H2afj
5.16993e-25	0.371881	0.851	0.801	1.44748e-20	DCT	Cox7a2
9.53989e-25	0.384769	0.842	0.793	2.67098e-20	DCT	Cox6b1
3.07944e-24	0.392307	0.794	0.698	8.62182e-20	DCT	Ndufa13
2.99035e-23	0.455341	0.678	0.56	8.37238e-19	DCT	Ndufb9
5.35858e-23	0.966409	0.7	0.637	1.5003e-18	DCT	S100g
6.20049e-23	0.565459	0.288	0.145	1.73601e-18	DCT	Gadd45a
6.70692e-23	0.632749	0.305	0.163	1.8778e-18	DCT	Idh2
7.15721e-23	0.428748	0.698	0.6	2.00387e-18	DCT	Ndufa7
2.32971e-22	0.330605	0.881	0.83	6.52273e-18	DCT	Uqcr10
3.25669e-22	0.535378	0.527	0.393	9.11809e-18	DCT	Ywhaq
6.90492e-22	0.321715	0.903	0.854	1.93324e-17	DCT	Cox7c
1.28517e-21	0.51483	0.329	0.175	3.59821e-17	DCT	Epcam
2.22914e-21	0.278046	0.933	0.896	6.24114e-17	DCT	Ndufa4
2.71263e-21	0.487429	0.531	0.383	7.59482e-17	DCT	Txnip
8.55011e-21	0.655942	0.269	0.141	2.39386e-16	DCT	Pth1r
5.68962e-20	0.448801	0.672	0.571	1.59298e-15	DCT	Ldhb
1.28993e-19	0.538283	0.454	0.318	3.61156e-15	DCT	Cd47
5.02057e-19	0.321771	0.851	0.797	1.40566e-14	DCT	Cox6a1
1.0037e-18	0.386008	0.703	0.605	2.81016e-14	DCT	Atp5g3
1.0867e-18	0.485923	0.587	0.473	3.04254e-14	DCT	Atp5a1
3.26397e-18	0.734466	0.28	0.156	9.13846e-14	DCT	Nupr1
3.34513e-18	0.356705	0.728	0.638	9.36569e-14	DCT	Atp5j2
6.47879e-18	0.530338	0.369	0.238	1.81393e-13	DCT	Ezr
7.41564e-18	0.450077	0.594	0.479	2.07623e-13	DCT	Ndufb11
2.65904e-17	0.339685	0.821	0.776	7.44479e-13	DCT	Uqcr11
3.52229e-17	0.451818	0.49	0.366	9.8617e-13	DCT	Spint2
1.16515e-16	0.374306	0.685	0.62	3.26218e-12	DCT	Slc25a5
1.47506e-16	0.514668	0.253	0.14	4.12987e-12	DCT	Sppl2a
3.14509e-16	0.569397	0.34	0.221	8.80563e-12	DCT	Gabarapl1
6.58823e-16	0.429219	0.602	0.51	1.84457e-11	DCT	Atp5h
1.97279e-15	0.446034	0.429	0.303	5.52343e-11	DCT	Cd9
6.52881e-15	0.498617	0.327	0.209	1.82794e-10	DCT	Itgav
6.1385e-13	0.32949	0.701	0.656	1.71866e-08	DCT	Mpc1
2.18812e-12	0.291546	0.753	0.7	6.12629e-08	DCT	Ndufa3
2.25428e-12	0.314911	0.698	0.652	6.31155e-08	DCT	2010107E04Rik
3.67888e-12	0.283699	0.635	0.539	1.03001e-07	DCT	Tspo
2.14999e-11	0.352189	0.599	0.531	6.01953e-07	DCT	Minos1
2.66874e-11	0.458679	0.41	0.319	7.47194e-07	DCT	Mgst3
5.29206e-11	0.385703	0.489	0.404	1.48167e-06	DCT	Zfp36l1
6.09242e-11	0.337161	0.999	0.999	1.70575e-06	DCT	mt-Co1
1.37874e-10	0.490372	0.286	0.196	3.86019e-06	DCT	H1f0
8.51139e-10	0.29353	0.586	0.504	2.38302e-05	DCT	Igfbp7
9.44788e-10	0.321992	0.489	0.404	2.64522e-05	DCT	Rabac1
9.5042e-10	0.278504	0.652	0.587	2.66098e-05	DCT	Atp5b
1.85575e-09	0.383271	0.264	0.179	5.19573e-05	DCT	Gm11273
2.90321e-09	0.450616	0.296	0.211	8.1284e-05	DCT	Aplp2
3.99731e-09	0.411768	0.291	0.206	0.000111917	DCT	Cdh16
1.11746e-08	0.381757	0.272	0.192	0.000312865	DCT	Stat3
1.28982e-07	0.31298	0.485	0.424	0.00361125	DCT	Psme2
1.54723e-07	0.298627	0.398	0.317	0.00433193	DCT	Psme1
2.72762e-07	0.366714	0.275	0.204	0.00763679	DCT	Ctnna1
4.02007e-07	0.445409	0.313	0.249	0.0112554	DCT	Oxct1
9.5962e-07	0.33935	0.52	0.484	0.0268674	DCT	Ndufb2
3.58781e-06	0.366348	0.274	0.213	0.100452	DCT	Cpt1a
5.35924e-06	0.263747	0.499	0.44	0.150048	DCT	Ctsb
6.6549e-06	0.290103	0.41	0.361	0.186324	DCT	Mrpl54
6.69223e-06	0.382721	0.299	0.241	0.187369	DCT	Dstn
6.96574e-06	0.333866	0.335	0.274	0.195027	DCT	Srp14
7.11493e-06	0.344417	0.407	0.361	0.199204	DCT	Ndufb5
8.29919e-06	0.265331	0.448	0.394	0.232361	DCT	Ndufs5
1.39885e-05	0.253839	0.498	0.453	0.39165	DCT	Aldoa
1.50312e-05	0.260385	0.974	0.98	0.420843	DCT	mt-Nd1
1.80819e-05	0.32285	0.341	0.287	0.506258	DCT	Idnk
2.27529e-05	0.294745	0.264	0.205	0.637036	DCT	1110008P14Rik
3.06402e-05	0.290671	0.466	0.428	0.857864	DCT	Atp5d
5.0459e-05	0.329231	0.338	0.289	1	DCT	Guk1
7.46317e-05	0.290371	0.365	0.311	1	DCT	Gclc
0.000146214	0.302018	0.258	0.208	1	DCT	Lsm6
0.000575936	0.290435	0.335	0.297	1	DCT	Tmem59
0.00098014	0.270106	0.473	0.459	1	DCT	Atp5o
0.00182888	0.258286	0.401	0.37	1	DCT	Hnrnpa2b1
0	3.63835	0.988	0.073	0	CD-IC	Atp6v1g3
0	1.84713	0.488	0.01	0	CD-IC	Hepacam2
5.05085e-302	1.4185	0.399	0.005	1.41414e-297	CD-IC	Atp6v0d2
7.58383e-295	1.55774	0.357	0.003	2.12332e-290	CD-IC	Foxi1
6.39174e-234	1.41352	0.304	0.004	1.78956e-229	CD-IC	Slc26a4
6.51693e-218	2.58351	0.911	0.117	1.82461e-213	CD-IC	Serpinb9
8.37503e-196	2.57255	0.673	0.06	2.34484e-191	CD-IC	Spink8
1.11084e-165	1.47393	0.345	0.013	3.11013e-161	CD-IC	Adgrf5
4.32543e-161	1.16563	0.28	0.008	1.21103e-156	CD-IC	Ociad2
2.24543e-141	2.42952	0.75	0.115	6.28677e-137	CD-IC	Pam
3.25321e-120	1.50107	0.452	0.041	9.10834e-116	CD-IC	Hexb
9.80668e-118	0.969915	0.292	0.014	2.74567e-113	CD-IC	Serpinb6b
3.57593e-92	1.42354	0.327	0.027	1.00119e-87	CD-IC	Car15
1.83949e-84	1.23413	0.315	0.028	5.1502e-80	CD-IC	Pros1
6.93035e-75	1.2898	0.637	0.131	1.94036e-70	CD-IC	Cd200
2.10443e-74	1.51198	0.863	0.332	5.892e-70	CD-IC	Scand1
2.71414e-60	0.933005	0.315	0.038	7.59904e-56	CD-IC	Plet1
2.40658e-55	1.05743	0.381	0.062	6.73794e-51	CD-IC	Cxadr
5.76274e-55	0.975766	0.286	0.036	1.61345e-50	CD-IC	Eps8
2.55744e-53	1.01088	0.292	0.038	7.16033e-49	CD-IC	Emb
3.7419e-53	1.27416	0.685	0.216	1.04766e-48	CD-IC	Atp6v1a
1.30091e-50	0.985154	0.357	0.058	3.64229e-46	CD-IC	Efhd1
2.41968e-48	0.955226	0.643	0.181	6.77461e-44	CD-IC	Epcam
2.18833e-45	1.14178	0.476	0.119	6.12688e-41	CD-IC	Atp6ap2
3.37928e-44	0.937553	0.268	0.039	9.46132e-40	CD-IC	Dmxl1
2.04058e-42	0.923532	0.387	0.079	5.71322e-38	CD-IC	St14
6.3236e-40	0.802118	0.304	0.052	1.77048e-35	CD-IC	Cav2
4.0646e-38	1.1252	0.536	0.17	1.13801e-33	CD-IC	Pgrmc1
5.88648e-38	1.10383	0.417	0.105	1.6481e-33	CD-IC	Qsox1
1.62641e-37	1.05347	0.893	0.61	4.55363e-33	CD-IC	Defb1
6.22059e-37	0.832557	0.857	0.431	1.74164e-32	CD-IC	Serinc3
1.6418e-36	0.760477	0.256	0.041	4.5967e-32	CD-IC	Pcolce
1.81999e-34	0.703178	0.28	0.052	5.09562e-30	CD-IC	Ap1ar
8.18639e-34	0.926132	0.78	0.401	2.29202e-29	CD-IC	Atp6v0b
2.38046e-33	0.841784	0.744	0.308	6.66482e-29	CD-IC	Cd24a
3.11596e-32	0.899477	0.911	0.61	8.72406e-28	CD-IC	S100a1
2.41584e-31	0.874532	0.69	0.308	6.76386e-27	CD-IC	Cd9
3.08053e-31	0.981283	0.339	0.082	8.62487e-27	CD-IC	Tuba1a
1.65057e-29	0.862346	0.417	0.12	4.62127e-25	CD-IC	Tfcp2l1
4.55893e-29	0.756499	0.327	0.079	1.27641e-24	CD-IC	Sgms1
3.85639e-28	0.642631	0.94	0.821	1.07971e-23	CD-IC	Itm2b
4.86515e-28	0.630413	0.262	0.053	1.36214e-23	CD-IC	Cldn8
1.37806e-27	0.761735	0.298	0.07	3.85829e-23	CD-IC	Crim1
4.40904e-27	0.680796	0.875	0.481	1.23444e-22	CD-IC	Tmem213
2.26476e-26	0.785879	0.75	0.388	6.34089e-22	CD-IC	Tapbp
1.79574e-25	0.663503	0.256	0.056	5.0277e-21	CD-IC	Muc1
2.99123e-25	0.797327	0.44	0.15	8.37486e-21	CD-IC	Atp6v1d
3.64622e-25	0.645068	0.327	0.085	1.02087e-20	CD-IC	Krt7
5.75182e-25	0.798606	0.833	0.555	1.61039e-20	CD-IC	S100a11
6.01283e-25	0.769926	0.423	0.137	1.68347e-20	CD-IC	Aldh1l1
1.08712e-24	0.726776	0.321	0.086	3.04371e-20	CD-IC	Atp6ap1
1.10378e-24	0.817155	0.827	0.513	3.09038e-20	CD-IC	Atp6v0e
2.90547e-24	0.867509	0.72	0.407	8.13474e-20	CD-IC	Cst3
4.23196e-24	0.769108	0.274	0.067	1.18486e-19	CD-IC	Rpap3
1.1063e-23	0.808072	0.833	0.534	3.09743e-19	CD-IC	Calm2
3.98522e-23	0.795139	0.72	0.402	1.11578e-18	CD-IC	App
4.58048e-23	0.566024	0.369	0.107	1.28244e-18	CD-IC	Cldn7
1.83758e-22	0.739283	0.339	0.102	5.14485e-18	CD-IC	Car2
1.30762e-21	0.69443	0.262	0.065	3.66108e-17	CD-IC	Csrp1
1.43903e-20	0.738704	0.488	0.201	4.02899e-16	CD-IC	Rer1
4.71531e-20	0.73248	0.339	0.111	1.32019e-15	CD-IC	Anxa4
6.85851e-20	0.595198	0.518	0.208	1.92025e-15	CD-IC	Cdh1
3.83754e-19	0.821967	0.363	0.125	1.07444e-14	CD-IC	Pigr
1.28883e-18	0.791986	0.506	0.227	3.60846e-14	CD-IC	Atp6v1e1
4.00408e-17	0.650927	0.488	0.216	1.12106e-12	CD-IC	Itgav
4.15394e-16	0.61386	0.631	0.338	1.16302e-11	CD-IC	Bsg
5.13627e-16	0.603204	0.274	0.087	1.43805e-11	CD-IC	Pla2g16
5.30733e-16	0.649687	0.464	0.206	1.48595e-11	CD-IC	Lsm6
2.05379e-15	0.499756	1	0.997	5.7502e-11	CD-IC	Spp1
2.91697e-15	0.610407	0.292	0.097	8.16694e-11	CD-IC	Clcnkb
3.21781e-15	0.588154	0.304	0.106	9.00922e-11	CD-IC	Rala
3.60387e-15	0.56831	0.292	0.098	1.00901e-10	CD-IC	Tnfsf10
2.74705e-14	0.631377	0.327	0.126	7.69118e-10	CD-IC	Ngfrap1
5.48314e-14	0.706573	0.304	0.112	1.53517e-09	CD-IC	Fos
6.00334e-14	0.604066	0.423	0.195	1.68082e-09	CD-IC	Arf6
6.05348e-14	0.586349	0.405	0.182	1.69485e-09	CD-IC	Litaf
6.50661e-14	0.492391	0.655	0.374	1.82172e-09	CD-IC	Spint2
2.71353e-13	0.493868	0.31	0.116	7.59735e-09	CD-IC	Atp6v0a4
3.93899e-13	0.429862	0.274	0.096	1.10284e-08	CD-IC	Elovl7
4.69108e-13	0.488432	0.696	0.423	1.31341e-08	CD-IC	H3f3a
5.17017e-13	0.534454	0.452	0.218	1.44754e-08	CD-IC	Rab7
6.53191e-13	0.490718	0.524	0.256	1.8288e-08	CD-IC	Pkm
1.06215e-12	0.457187	0.899	0.699	2.9738e-08	CD-IC	Ndufa1
1.33221e-12	0.524773	0.667	0.424	3.72992e-08	CD-IC	Psme2
1.70869e-12	0.311419	0.97	0.908	4.784e-08	CD-IC	B2m
2.38039e-12	0.492233	0.292	0.111	6.66462e-08	CD-IC	Etnk1
5.31523e-12	0.526539	0.369	0.165	1.48816e-07	CD-IC	Ptbp3
6.32275e-12	0.66516	0.339	0.15	1.77024e-07	CD-IC	Hn1
9.14936e-12	0.502555	0.47	0.236	2.56164e-07	CD-IC	Gnb1
3.23792e-11	0.41324	0.845	0.668	9.06553e-07	CD-IC	Gng5
3.35374e-11	0.476311	0.53	0.295	9.38981e-07	CD-IC	Tmem59
4.88509e-11	0.443091	0.768	0.514	1.36773e-06	CD-IC	Atp5h
5.39173e-11	0.3822	0.315	0.129	1.50958e-06	CD-IC	Sdf4
6.53242e-11	0.509371	0.381	0.18	1.82895e-06	CD-IC	Myl12b
6.67103e-11	0.412119	0.357	0.158	1.86776e-06	CD-IC	Arpc1b
7.42649e-11	0.506312	0.44	0.226	2.07927e-06	CD-IC	Slc25a4
7.47043e-11	0.44904	0.774	0.547	2.09157e-06	CD-IC	Ly6e
7.7307e-11	0.5434	0.423	0.215	2.16444e-06	CD-IC	Aplp2
7.8239e-11	0.520289	0.333	0.146	2.19054e-06	CD-IC	Oasl2
9.4028e-11	0.395003	0.714	0.436	2.6326e-06	CD-IC	Tmbim4
9.55563e-11	0.355211	0.363	0.167	2.67538e-06	CD-IC	Nupr1
9.81639e-11	0.451335	0.685	0.452	2.74839e-06	CD-IC	Aldoa
1.00722e-10	0.495893	0.732	0.517	2.82003e-06	CD-IC	Atp6v1f
1.50608e-10	0.560233	0.357	0.172	4.21671e-06	CD-IC	Ppp1cb
1.56905e-10	0.446748	0.262	0.105	4.39304e-06	CD-IC	Fam162a
1.81229e-10	0.442484	0.363	0.169	5.07404e-06	CD-IC	Paqr5
1.84717e-10	0.343961	0.905	0.747	5.1717e-06	CD-IC	Ptma
2.33264e-10	0.492575	0.458	0.246	6.53092e-06	CD-IC	Btg1
3.08495e-10	0.478136	0.643	0.413	8.63725e-06	CD-IC	1810037I17Rik
3.72925e-10	0.593661	0.274	0.117	1.04412e-05	CD-IC	Ugdh
3.99803e-10	0.340993	0.554	0.311	1.11937e-05	CD-IC	Gclc
4.18686e-10	0.437267	0.47	0.248	1.17224e-05	CD-IC	Prdx2
5.60956e-10	0.591169	0.274	0.115	1.57056e-05	CD-IC	Sox4
6.66836e-10	0.475652	0.274	0.116	1.86701e-05	CD-IC	Rnf149
6.9299e-10	0.410193	0.292	0.121	1.94023e-05	CD-IC	Hes1
7.61645e-10	0.367193	0.577	0.331	2.13245e-05	CD-IC	Ivns1abp
8.87331e-10	0.46675	0.262	0.108	2.48435e-05	CD-IC	Msi2
9.8423e-10	0.616639	0.333	0.159	2.75565e-05	CD-IC	Gadd45a
1.19475e-09	0.450745	0.375	0.184	3.34507e-05	CD-IC	Reep5
1.22364e-09	0.550926	0.304	0.136	3.42594e-05	CD-IC	Tmem30a
1.71674e-09	0.450921	0.571	0.347	4.80652e-05	CD-IC	Ghitm
1.99056e-09	0.463452	0.607	0.389	5.57317e-05	CD-IC	Wbp5
3.41346e-09	0.35732	0.274	0.117	9.557e-05	CD-IC	Rap1a
4.11317e-09	0.367975	0.44	0.229	0.00011516	CD-IC	Ppib
4.18539e-09	0.388116	0.369	0.183	0.000117183	CD-IC	Gm10250
1.23102e-08	0.36257	0.405	0.211	0.00034466	CD-IC	Cdh16
1.3892e-08	0.405842	0.482	0.275	0.000388949	CD-IC	Acadl
1.51454e-08	0.49578	0.274	0.125	0.000424042	CD-IC	Nudt19
1.51744e-08	0.36739	0.619	0.392	0.000424852	CD-IC	Laptm4a
1.84375e-08	0.449036	0.369	0.192	0.000516213	CD-IC	Map1lc3a
2.3048e-08	0.350899	0.262	0.114	0.000645298	CD-IC	Nfe2l1
2.80876e-08	0.364824	0.845	0.673	0.000786397	CD-IC	H2-K1
3.2375e-08	0.270229	0.405	0.214	0.000906436	CD-IC	Junb
3.43933e-08	0.372452	0.613	0.396	0.000962944	CD-IC	Txnip
3.91555e-08	0.410698	0.375	0.198	0.00109627	CD-IC	Nudt4
4.77777e-08	0.388717	0.31	0.151	0.00133768	CD-IC	Drap1
5.95251e-08	0.453626	0.643	0.436	0.00166658	CD-IC	Ndufab1
8.95661e-08	0.464885	0.286	0.139	0.00250767	CD-IC	Jun
1.0175e-07	0.39502	0.512	0.322	0.00284881	CD-IC	Psme1
1.14911e-07	0.397012	0.595	0.398	0.00321729	CD-IC	Tmem176a
1.28532e-07	0.369387	0.351	0.182	0.00359864	CD-IC	Ube2d2a
1.28844e-07	0.38428	0.286	0.138	0.00360737	CD-IC	F11r
1.42749e-07	0.30868	0.619	0.41	0.00399668	CD-IC	Sh3bgrl3
1.53737e-07	0.345838	0.643	0.432	0.00430434	CD-IC	Jund
1.67225e-07	0.354517	0.435	0.244	0.00468196	CD-IC	Rtp4
1.68368e-07	0.373988	0.607	0.409	0.00471397	CD-IC	Rabac1
1.70616e-07	0.383355	0.298	0.146	0.00477691	CD-IC	Rab18
1.7228e-07	0.253129	0.821	0.679	0.00482349	CD-IC	Ifitm3
1.88143e-07	0.313517	0.274	0.129	0.00526762	CD-IC	Ptp4a2
2.16892e-07	0.340072	0.315	0.161	0.00607254	CD-IC	Mat2b
2.52889e-07	0.339398	0.274	0.13	0.00708038	CD-IC	Ppp1r2
2.60017e-07	0.374429	0.696	0.49	0.00727995	CD-IC	Smdt1
2.65268e-07	0.437758	0.375	0.212	0.00742697	CD-IC	Npc2
2.66549e-07	0.360068	0.577	0.378	0.00746285	CD-IC	Tmem176b
2.71136e-07	0.357671	0.375	0.205	0.00759126	CD-IC	Tm2d1
4.01833e-07	0.390989	0.327	0.175	0.0112505	CD-IC	Nenf
5.56569e-07	0.330615	0.429	0.25	0.0155828	CD-IC	Ezr
6.18529e-07	0.325118	0.47	0.279	0.0173176	CD-IC	Mrps24
7.74998e-07	0.327793	0.393	0.223	0.0216984	CD-IC	Shisa5
9.42477e-07	0.341299	0.286	0.144	0.0263875	CD-IC	Aes
9.81268e-07	0.297793	0.286	0.146	0.0274736	CD-IC	Bcap31
1.19209e-06	0.312269	0.292	0.148	0.0333762	CD-IC	Psme2b
1.42398e-06	0.314095	0.369	0.206	0.0398685	CD-IC	Chchd1
1.49736e-06	0.374471	0.369	0.212	0.0419231	CD-IC	Ndufs2
1.66818e-06	0.411534	0.524	0.35	0.0467056	CD-IC	Pdzk1ip1
1.71187e-06	0.365307	0.744	0.579	0.047929	CD-IC	Ldhb
1.77049e-06	0.278759	0.327	0.176	0.0495702	CD-IC	Mien1
1.83268e-06	0.402587	0.256	0.128	0.0513114	CD-IC	AI413582
2.08759e-06	0.282394	0.667	0.468	0.0584483	CD-IC	Pfdn5
2.85354e-06	0.260354	0.256	0.126	0.0798935	CD-IC	Brd2
4.19531e-06	0.272482	0.262	0.133	0.11746	CD-IC	Commd6
5.21252e-06	0.263724	0.518	0.332	0.14594	CD-IC	Dad1
5.43226e-06	0.356069	0.339	0.196	0.152092	CD-IC	Ddx3x
5.55637e-06	0.375665	0.601	0.417	0.155567	CD-IC	Bst2
5.66863e-06	0.291643	0.589	0.415	0.15871	CD-IC	Ndufa11
7.03915e-06	0.285637	0.375	0.218	0.197082	CD-IC	Vdac2
7.59424e-06	0.413711	0.262	0.139	0.212623	CD-IC	Ccs
8.53575e-06	0.277846	0.268	0.14	0.238984	CD-IC	Wls
8.89225e-06	0.328912	0.607	0.442	0.248965	CD-IC	Morf4l1
9.0545e-06	0.420428	0.357	0.222	0.253508	CD-IC	Hnrnpab
1.50926e-05	0.290712	0.387	0.232	0.422564	CD-IC	Dnajb6
1.62184e-05	0.313021	0.351	0.205	0.454083	CD-IC	Dctn3
1.68724e-05	0.280257	0.464	0.298	0.472393	CD-IC	Gclm
1.69931e-05	0.32168	0.315	0.18	0.475773	CD-IC	Smim22
1.76181e-05	0.28656	0.44	0.281	0.493272	CD-IC	Pnp
1.96588e-05	0.282117	0.429	0.272	0.550408	CD-IC	Pdia3
1.9672e-05	0.26715	0.31	0.17	0.550777	CD-IC	Rnaset2b
2.05756e-05	0.262288	0.298	0.166	0.576075	CD-IC	Arf3
2.12968e-05	0.267936	0.571	0.392	0.596267	CD-IC	Uqcc2
2.68666e-05	0.26262	0.44	0.277	0.752212	CD-IC	Srp14
3.32819e-05	0.290957	0.381	0.231	0.931826	CD-IC	Ifit1
3.50813e-05	0.338391	0.333	0.202	0.982206	CD-IC	Pnkd
3.72853e-05	0.315957	0.363	0.22	1	CD-IC	Ctnnb1
4.60404e-05	0.300649	0.411	0.265	1	CD-IC	Vapa
5.02694e-05	0.261783	0.518	0.362	1	CD-IC	Ndufb5
5.06922e-05	0.267941	0.661	0.489	1	CD-IC	Ndufb11
5.3411e-05	0.266111	0.476	0.312	1	CD-IC	Ndufs3
7.55619e-05	0.25302	0.298	0.174	1	CD-IC	Rnh1
7.69031e-05	0.349892	0.256	0.147	1	CD-IC	Tor1aip2
0.00010057	0.281715	0.268	0.154	1	CD-IC	Rtn3
0.000103254	0.304768	0.369	0.237	1	CD-IC	Mrpl51
0.000109959	0.264605	0.345	0.215	1	CD-IC	Arf1
0.000134418	0.296062	0.577	0.428	1	CD-IC	2410015M20Rik
0.000157082	0.40156	0.268	0.166	1	CD-IC	Trappc4
0.000167893	0.252255	0.375	0.241	1	CD-IC	Gnas
0.000189645	0.258524	0.476	0.332	1	CD-IC	Dynll1
0.000214269	0.264688	0.702	0.563	1	CD-IC	Nop10
0.00022352	0.28594	0.256	0.149	1	CD-IC	Anp32a
0.000224364	0.335267	0.423	0.29	1	CD-IC	Tmem167
0.000233101	0.305035	0.256	0.152	1	CD-IC	Nxf1
0.000238165	0.301196	0.327	0.21	1	CD-IC	Cox7a2l
0.000238289	0.272151	0.363	0.237	1	CD-IC	Rbm39
0.000297517	0.283883	0.685	0.548	1	CD-IC	Tspo
0.000541801	0.273661	0.542	0.396	1	CD-IC	Ndufs5
0.000555825	0.2649	0.274	0.171	1	CD-IC	Aco2
0.000620514	0.260587	0.375	0.254	1	CD-IC	Tm9sf2
0.000689898	0.251411	0.393	0.269	1	CD-IC	Tmed10
0.000707278	0.258264	0.286	0.181	1	CD-IC	Chmp5
0.000715502	0.278655	0.268	0.167	1	CD-IC	Sh3glb1
0.00100661	0.286971	0.327	0.216	1	CD-IC	Snrnp27
0.00104044	0.33636	0.536	0.422	1	CD-IC	Lamp1
0.00108367	0.251045	0.304	0.198	1	CD-IC	Tagln2
0.00113199	0.355799	0.381	0.277	1	CD-IC	Ifi47
0.00118197	0.252652	0.256	0.158	1	CD-IC	Rab14
0.00124878	0.265258	0.31	0.206	1	CD-IC	Srsf5
0.00130727	0.254775	0.256	0.16	1	CD-IC	Dync1h1
0.00154109	0.26033	0.256	0.162	1	CD-IC	Arhgdia
0.00199443	0.267138	0.28	0.183	1	CD-IC	Pgam1
0.00199503	0.27321	0.357	0.248	1	CD-IC	Rab11a
0.00469774	0.28888	0.274	0.187	1	CD-IC	Bloc1s1
0.00504738	0.255919	0.375	0.278	1	CD-IC	Smpdl3a
4.0736e-291	2.51108	0.719	0.041	1.14053e-286	CD-PC	Fxyd4
1.64879e-262	2.25748	0.596	0.028	4.61629e-258	CD-PC	Hsd11b2
3.05829e-254	3.27464	0.924	0.104	8.5626e-250	CD-PC	Aqp2
1.86795e-231	1.8256	0.491	0.02	5.22988e-227	CD-PC	Aqp3
8.85447e-162	1.33485	0.304	0.01	2.47908e-157	CD-PC	Kcne1
4.13521e-116	1.54606	0.392	0.031	1.15778e-111	CD-PC	Defb2
1.92775e-97	1.33884	0.433	0.048	5.39731e-93	CD-PC	Cav2
2.25237e-90	1.85122	0.936	0.399	6.30618e-86	CD-PC	Sh3bgrl3
6.34537e-90	1.36478	0.579	0.094	1.77658e-85	CD-PC	Tacstd2
4.19382e-86	1.5416	0.538	0.089	1.17419e-81	CD-PC	Sgk1
1.05821e-82	1.74992	0.971	0.534	2.96277e-78	CD-PC	Clu
1.94607e-79	1.36418	0.579	0.107	5.44861e-75	CD-PC	Tspan8
6.50632e-79	1.47007	0.947	0.443	1.82164e-74	CD-PC	Tmsb4x
4.90699e-73	1.36578	0.959	0.54	1.37386e-68	CD-PC	Ly6e
4.66433e-72	1.04747	0.263	0.023	1.30592e-67	CD-PC	Scnn1b
2.15557e-63	1.09565	0.298	0.034	6.03517e-59	CD-PC	Ehf
1.57376e-62	1.18472	0.339	0.046	4.40622e-58	CD-PC	Krt18
6.17838e-62	1.32287	0.801	0.283	1.72982e-57	CD-PC	Wfdc2
2.62366e-61	1.54677	0.731	0.26	7.34572e-57	CD-PC	Lgals3
2.78978e-61	1.28016	0.883	0.43	7.81082e-57	CD-PC	Serinc3
1.59637e-60	1.10844	0.415	0.069	4.46953e-56	CD-PC	Spink8
2.80199e-60	1.14846	0.287	0.033	7.84502e-56	CD-PC	Rnf186
6.15938e-60	1.14681	0.433	0.075	1.7245e-55	CD-PC	Cdo1
1.29651e-58	1.30018	0.491	0.103	3.62997e-54	CD-PC	Cldn7
4.4857e-56	1.5026	0.778	0.341	1.25591e-51	CD-PC	Pdzk1ip1
1.5829e-55	1.11678	0.363	0.057	4.43181e-51	CD-PC	Kcnj1
1.19697e-54	1.23841	0.427	0.081	3.35129e-50	CD-PC	Krt7
2.86666e-53	1.22608	0.322	0.048	8.02606e-49	CD-PC	Cldn4
1.09213e-51	1.24147	0.778	0.306	3.05775e-47	CD-PC	Cd24a
5.36805e-47	1.44986	0.275	0.04	1.50295e-42	CD-PC	Plet1
1.73556e-46	1.06675	0.275	0.04	4.85922e-42	CD-PC	Tspan1
4.15198e-44	0.909999	0.251	0.034	1.16247e-39	CD-PC	Tspan15
6.66481e-44	1.18733	0.485	0.124	1.86601e-39	CD-PC	Tmem52b
7.36841e-44	0.810023	0.971	0.82	2.06301e-39	CD-PC	Itm2b
9.6274e-42	0.740459	0.994	0.879	2.69548e-37	CD-PC	Ly6a
9.94106e-41	1.03394	0.333	0.065	2.7833e-36	CD-PC	Smco4
2.34545e-40	0.921592	0.889	0.48	6.56679e-36	CD-PC	Tmem213
2.10307e-38	1.04103	0.333	0.067	5.88817e-34	CD-PC	Rasd1
3.00602e-38	0.987528	0.263	0.044	8.41625e-34	CD-PC	Serpinb1a
8.81117e-38	0.970609	0.292	0.054	2.46695e-33	CD-PC	Mal2
3.14473e-37	0.960038	0.281	0.051	8.8046e-33	CD-PC	Tmem178
8.96536e-37	1.13839	0.515	0.163	2.51012e-32	CD-PC	Rnaset2b
9.22768e-37	0.998123	0.708	0.307	2.58356e-32	CD-PC	Cd9
2.39776e-36	0.92739	0.281	0.051	6.71324e-32	CD-PC	Tspan12
1.03287e-35	1.01682	0.86	0.577	2.89184e-31	CD-PC	Sepw1
2.86126e-35	0.855987	0.883	0.626	8.01095e-31	CD-PC	Cystm1
3.36547e-35	0.77379	0.924	0.617	9.42265e-31	CD-PC	Atp1b1
1.59334e-34	1.00585	0.444	0.129	4.46102e-30	CD-PC	Rnaset2a
1.24442e-33	1.09763	0.561	0.206	3.48412e-29	CD-PC	Cdh16
5.31195e-32	1.14045	0.69	0.361	1.48724e-27	CD-PC	Isg15
2.59111e-30	1.03216	0.713	0.413	7.2546e-26	CD-PC	Bst2
4.74752e-30	0.762228	0.456	0.137	1.32921e-25	CD-PC	Cd200
4.13967e-29	0.967102	0.316	0.078	1.15902e-24	CD-PC	Cd82
4.52461e-29	0.868429	0.374	0.101	1.2668e-24	CD-PC	Scd2
1.36074e-26	1.04889	0.497	0.194	3.80979e-22	CD-PC	Nudt4
3.25802e-26	1.02174	0.503	0.202	9.1218e-22	CD-PC	1110008P14Rik
9.13414e-26	0.879924	0.31	0.083	2.55738e-21	CD-PC	Gstt1
1.21935e-25	0.882539	0.339	0.096	3.41395e-21	CD-PC	Rnf128
1.62574e-25	0.947808	0.848	0.678	4.55175e-21	CD-PC	Ifitm3
8.20866e-25	0.928431	0.532	0.216	2.29826e-20	CD-PC	Ifit3
1.17212e-23	0.81013	0.795	0.544	3.28171e-19	CD-PC	Tspo
3.58605e-23	0.759455	0.263	0.064	1.00402e-18	CD-PC	Arhgdib
5.08775e-23	0.732468	0.801	0.513	1.42447e-18	CD-PC	Irf7
2.63966e-21	0.609209	0.924	0.757	7.39053e-17	CD-PC	Lcn2
3.64262e-21	0.753654	0.421	0.156	1.01986e-16	CD-PC	Arpc1b
2.01529e-20	0.906014	0.316	0.103	5.64241e-16	CD-PC	Car2
2.42021e-20	0.721984	0.38	0.131	6.77611e-16	CD-PC	Mal
4.85575e-20	0.702004	0.795	0.602	1.35951e-15	CD-PC	Psmb8
8.11592e-20	0.782442	0.327	0.106	2.2723e-15	CD-PC	Ifit3b
2.26042e-19	0.784308	0.322	0.104	6.32872e-15	CD-PC	Hoxd8
9.9637e-19	0.698259	0.439	0.175	2.78964e-14	CD-PC	Pycard
6.05966e-18	0.672847	0.614	0.33	1.69658e-13	CD-PC	Ivns1abp
7.61981e-18	0.835962	0.304	0.1	2.13339e-13	CD-PC	Aif1l
1.25212e-17	0.465319	0.918	0.746	3.50569e-13	CD-PC	Ptma
4.88799e-17	0.39648	0.988	0.907	1.36854e-12	CD-PC	B2m
1.13087e-16	0.719103	0.292	0.098	3.16621e-12	CD-PC	Tnfsf10
1.15026e-16	1.14475	0.31	0.112	3.22049e-12	CD-PC	Fos
1.48446e-16	0.411219	0.965	0.859	4.15619e-12	CD-PC	H3f3b
1.89093e-16	0.665556	0.444	0.188	5.29422e-12	CD-PC	Epcam
2.30851e-16	0.274893	0.93	0.608	6.46337e-12	CD-PC	Defb1
2.86697e-16	0.754781	0.327	0.123	8.02695e-12	CD-PC	Tfcp2l1
[truncated: 1,576 more rows]

## Sheet: 27hr_markers
p-value	avg_logFC	pct.1	pct.2	p_val_adj	cluster	gene
[truncated: 9,179 more rows]

[truncated: 2 more sheets: 36hr_markers, 48hr_markers]
