# Supplementary material for: The orchestrated cellular and molecular responses of the kidney to endotoxin define a precise sepsis timeline
Source: eLife. 2021 Jan 15;10:e62270. doi: 10.7554/eLife.62270 (PMC7810465; doi:10.7554/eLife.62270)
Supplement: Supplementary file 2. [file elife-62270-supp2.xlsx]

## Sheet: Table S2
groupA	groupB	interactPositionA	interactionA: receptor ligand pair names	strength	opacity	timepoint (hrs)
Prolif cells	Prolif cells	33	BMP4_BMR1A_ACR2A	0.222	0.122112	0
Prolif cells	Prolif cells	46	BMP4_BMPR1A_BMPR2	0.309	0.169967	0
Prolif cells	Prolif cells	59	a4b1 complex_SPP1	0.919	0.505501	0
Prolif cells	Endo	7	IL15_IL15RA	0.2	0.110011	0
Prolif cells	Endo	24	aVb6 complex_TGFB1	0.453	0.249175	0
Prolif cells	Endo	26	GRN_TNFRSF1A	0.6	0.330033	0
Prolif cells	Endo	56	RIPK1_TNFSF10	0.353	0.194169	0
Prolif cells	Endo	60	APLN_APLNR	0.212	0.116612	0
Prolif cells	Endo	62	PDGFC_FLT4	0.152	0.0836084	0
Prolif cells	Endo	63	RIF1_NOTCH1	0.283	0.155666	0
Prolif cells	Ly	6	FGF1_FGFR1	0.465	0.255776	0
Prolif cells	Ly	8	BMP7_BMR1B_AVR2B	0.398	0.218922	0
Prolif cells	Ly	9	BMP7_BMR1B_AVR2A	0.398	0.218922	0
Prolif cells	Ly	11	BMP7_BMPR1B_BMPR2	0.398	0.218922	0
Prolif cells	Ly	12	CLEC2D_FAM3C	1.02	0.561056	0
Prolif cells	Ly	15	aVb1 complex_FN1	0.407	0.223872	0
Prolif cells	Ly	19	IGF1R_IGF1	0.782	0.430143	0
Prolif cells	Ly	20	GRN_TNFRSF1B	0.51	0.280528	0
Prolif cells	Ly	25	SPP1_CD44	1.499	0.824532	0
Prolif cells	Ly	36	FGF1_FGFR3	0.465	0.255776	0
Prolif cells	Ly	37	BMP4_BMPR1B_BMPR2	0.466	0.256326	0
Prolif cells	Ly	38	BMP4_BMR1B_AVR2A	0.466	0.256326	0
Prolif cells	Ly	39	BMP4_BMR1B_AVR2B	0.466	0.256326	0
Prolif cells	Ly	40	aVb5 complex_FN1	0.344	0.189219	0
Prolif cells	Ly	53	a4b7 complex_FN1	0.356	0.19582	0
Prolif cells	Ly	54	a4b1 complex_FN1	0.356	0.19582	0
Prolif cells	Ly	55	CD52_SIGLEC10	0.313	0.172167	0
Prolif cells	Ly	62	PDGFC_FLT4	0.276	0.151815	0
Prolif cells	Mp-DC+Dendritic cells	5	JAM3_aMb2 complex	0.207	0.113861	0
Prolif cells	Mp-DC+Dendritic cells	14	GAS6_AXL	0.618	0.339934	0
Prolif cells	Mp-DC+Dendritic cells	15	aVb1 complex_FN1	0.25	0.137514	0
Prolif cells	Mp-DC+Dendritic cells	20	GRN_TNFRSF1B	0.307	0.168867	0
Prolif cells	Mp-DC+Dendritic cells	24	aVb6 complex_TGFB1	0.672	0.369637	0			Note: This supplemental table is related to the circular plots shown in Figure 6.
Prolif cells	Mp-DC+Dendritic cells	25	SPP1_CD44	1.059	0.582508	0
Prolif cells	Mp-DC+Dendritic cells	26	GRN_TNFRSF1A	0.406	0.223322	0
Prolif cells	Mp-DC+Dendritic cells	40	aVb5 complex_FN1	0.187	0.10286	0
Prolif cells	Mp-DC+Dendritic cells	53	a4b7 complex_FN1	0.199	0.109461	0
Prolif cells	Mp-DC+Dendritic cells	54	a4b1 complex_FN1	0.199	0.109461	0
Prolif cells	Mp-DC+Dendritic cells	55	CD52_SIGLEC10	0.409	0.224972	0
Prolif cells	Ne	5	JAM3_aMb2 complex	0.21	0.115512	0
Prolif cells	Ne	25	SPP1_CD44	1.14	0.627063	0
Prolif cells	Ne	56	RIPK1_TNFSF10	0.381	0.209571	0
Prolif cells	Peri / St	3	FZD1_WNT5A	0.26	0.143014	0
Prolif cells	Peri / St	4	aVb6 complex_TNC	0.316	0.173817	0
Prolif cells	Peri / St	7	IL15_IL15RA	0.195	0.107261	0
Prolif cells	Peri / St	10	TTR_DDR1	0.586	0.322332	0
Prolif cells	Peri / St	14	GAS6_AXL	0.619	0.340484	0
Prolif cells	Peri / St	21	BMP7_BMPR1A_BMPR2	0.249	0.136964	0
Prolif cells	Peri / St	22	SEMA4D_PLXNB1	0.241	0.132563	0
Prolif cells	Peri / St	41	FGF1_FGFR2	0.271	0.149065	0
Prolif cells	Peri / St	46	BMP4_BMPR1A_BMPR2	0.317	0.174367	0
Prolif cells	Peri / St	52	a4b1 complex_TNC	0.201	0.110561	0
Prolif cells	Peri / St	59	a4b1 complex_SPP1	1.818	1	0
Prolif cells	Peri / St	61	ROR1_WNT5A	0.165	0.0907591	0
Prolif cells	S1	46	BMP4_BMPR1A_BMPR2	0.231	0.127063	0
Prolif cells	S1	58	CD74_MIF	1.413	0.777228	0
Prolif cells	S1	59	a4b1 complex_SPP1	1.089	0.59901	0
Prolif cells	S3	46	BMP4_BMPR1A_BMPR2	0.24	0.132013	0
Prolif cells	S3	56	RIPK1_TNFSF10	0.141	0.0775578	0
Endo	Prolif cells	13	GAS6_MERTK	0.827	0.500605	0
Endo	Prolif cells	26	GRN_TNFRSF1A	0.443	0.26816	0
Endo	Prolif cells	42	EFNA1_EPHA4	0.437	0.264528	0
Endo	Prolif cells	44	NRP1_VEGFA	1.054	0.638015	0
Endo	Prolif cells	45	TGFbeta receptor1_TGFB1	0.377	0.228208	0
Endo	Prolif cells	57	PLAUR_a4b1 complex	0.206	0.124697	0
Endo	Prolif cells	73	TNFSF12_TNFRSF12A	0.172	0.104116	0
Endo	Prolif cells	74	JAM2_JAM3	0.259	0.15678	0
Endo	Prolif cells	77	FLT1 complex_VEGFB	0.907	0.549031	0
Endo	Prolif cells	78	KDR_VEGFA	0.964	0.583535	0
Endo	Prolif cells	79	NRP2_VEGFA	0.34	0.205811	0
Endo	Prolif cells	80	FLT1 complex_VEGFA	0.964	0.583535	0
Endo	Prolif cells	81	NRP2_SEMA3C	0.23	0.139225	0
Endo	Prolif cells	82	FLT1_VEGFB	0.934	0.565375	0
Endo	Prolif cells	83	FLT1_VEGFA	0.991	0.599879	0
Endo	Prolif cells	84	NRP1_VEGFB	0.997	0.603511	0
Endo	Endo	7	IL15_IL15RA	0.15	0.090799	0
Endo	Endo	13	GAS6_MERTK	0.817	0.494552	0
Endo	Endo	23	a6b1 complex_LAMC1	0.462	0.279661	0
Endo	Endo	24	aVb6 complex_TGFB1	0.328	0.198547	0
Endo	Endo	26	GRN_TNFRSF1A	0.719	0.43523	0
Endo	Endo	42	EFNA1_EPHA4	0.468	0.283293	0
Endo	Endo	44	NRP1_VEGFA	0.96	0.581114	0
Endo	Endo	45	TGFbeta receptor1_TGFB1	0.603	0.365012	0
Endo	Endo	74	JAM2_JAM3	0.351	0.21247	0
Endo	Endo	75	NRP2_SEMA3F	0.285	0.172518	0
Endo	Endo	78	KDR_VEGFA	0.87	0.526634	0
Endo	Endo	80	FLT1 complex_VEGFA	0.87	0.526634	0
Endo	Endo	83	FLT1_VEGFA	0.897	0.542978	0
Endo	Ly	15	aVb1 complex_FN1	0.63	0.381356	0
Endo	Ly	16	HBEGF_EGFR	0.372	0.225182	0
Endo	Ly	18	HBEGF_CD44	0.794	0.48063	0
Endo	Ly	19	IGF1R_IGF1	0.787	0.476392	0
Endo	Ly	20	GRN_TNFRSF1B	0.629	0.380751	0
Endo	Ly	25	SPP1_CD44	1.071	0.648305	0
Endo	Ly	40	aVb5 complex_FN1	0.441	0.266949	0
Endo	Ly	42	EFNA1_EPHA4	0.613	0.371065	0
Endo	Ly	43	EFNA1_EPHA2	0.73	0.441889	0
Endo	Ly	57	PLAUR_a4b1 complex	0.481	0.291162	0
Endo	Ly	65	KDR_VEGFC	0.993	0.60109	0
Endo	Ly	67	a5b1 complex_FN1	0.374	0.226392	0
Endo	Ly	68	CSF1_CSF1R	0.654	0.395884	0
Endo	Ly	71	a3b1 complex_FN1	0.364	0.220339	0
Endo	Ly	74	JAM2_JAM3	0.374	0.226392	0
Endo	Ly	75	NRP2_SEMA3F	0.436	0.263923	0
Endo	Ly	76	CX3CL1_CX3CR1	0.684	0.414044	0
Endo	Mp-DC+Dendritic cells	5	JAM3_aMb2 complex	0.298	0.180387	0
Endo	Mp-DC+Dendritic cells	14	GAS6_AXL	0.816	0.493947	0
Endo	Mp-DC+Dendritic cells	15	aVb1 complex_FN1	0.473	0.28632	0
Endo	Mp-DC+Dendritic cells	18	HBEGF_CD44	0.354	0.214286	0
Endo	Mp-DC+Dendritic cells	20	GRN_TNFRSF1B	0.425	0.257264	0
Endo	Mp-DC+Dendritic cells	24	aVb6 complex_TGFB1	0.547	0.331114	0
Endo	Mp-DC+Dendritic cells	26	GRN_TNFRSF1A	0.524	0.317191	0
Endo	Mp-DC+Dendritic cells	40	aVb5 complex_FN1	0.284	0.171913	0
Endo	Mp-DC+Dendritic cells	45	TGFbeta receptor1_TGFB1	0.822	0.497579	0
Endo	Mp-DC+Dendritic cells	57	PLAUR_a4b1 complex	0.35	0.211864	0
Endo	Mp-DC+Dendritic cells	67	a5b1 complex_FN1	0.217	0.131356	0
Endo	Mp-DC+Dendritic cells	68	CSF1_CSF1R	0.343	0.207627	0
Endo	Mp-DC+Dendritic cells	70	PROS1_AXL	0.173	0.104722	0
Endo	Mp-DC+Dendritic cells	71	a3b1 complex_FN1	0.207	0.125303	0
Endo	Mp-DC+Dendritic cells	76	CX3CL1_CX3CR1	0.2	0.121065	0
Endo	Ne	5	JAM3_aMb2 complex	0.302	0.182809	0
Endo	Ne	16	HBEGF_EGFR	0.34	0.205811	0
Endo	Ne	18	HBEGF_CD44	0.435	0.263317	0
Endo	Ne	25	SPP1_CD44	0.712	0.430993	0
Endo	Ne	44	NRP1_VEGFA	1.306	0.790557	0
Endo	Ne	45	TGFbeta receptor1_TGFB1	0.432	0.261501	0
Endo	Ne	57	PLAUR_a4b1 complex	0.35	0.211864	0
Endo	Ne	68	CSF1_CSF1R	0.185	0.111985	0
Endo	Ne	72	EFNA1_EPHA1	0.544	0.329298	0
Endo	Ne	76	CX3CL1_CX3CR1	0.164	0.0992736	0
Endo	Ne	78	KDR_VEGFA	1.216	0.736077	0
Endo	Ne	80	FLT1 complex_VEGFA	1.216	0.736077	0
Endo	Ne	83	FLT1_VEGFA	1.243	0.752421	0
Endo	Peri / St	2	FcRn complex_ALB	0.366	0.22155	0
Endo	Peri / St	4	aVb6 complex_TNC	0.191	0.115617	0
Endo	Peri / St	14	GAS6_AXL	0.818	0.495157	0
Endo	Peri / St	23	a6b1 complex_LAMC1	0.393	0.237893	0
Endo	Peri / St	26	GRN_TNFRSF1A	0.495	0.299637	0
Endo	Peri / St	29	EFNA1_EPHA7	0.472	0.285714	0
Endo	Peri / St	43	EFNA1_EPHA2	0.462	0.279661	0
Endo	Peri / St	44	NRP1_VEGFA	0.966	0.584746	0
Endo	Peri / St	64	PDGFB_PDGFRB	0.254	0.153753	0
Endo	Peri / St	66	PDGFD_PDGFRB	0.208	0.125908	0
Endo	Peri / St	68	CSF1_CSF1R	0.326	0.197337	0
Endo	Peri / St	70	PROS1_AXL	0.174	0.105327	0
Endo	Peri / St	73	TNFSF12_TNFRSF12A	0.32	0.193705	0
Endo	Peri / St	75	NRP2_SEMA3F	0.212	0.128329	0
Endo	Peri / St	77	FLT1 complex_VEGFB	0.91	0.550847	0
Endo	Peri / St	78	KDR_VEGFA	0.877	0.530872	0
Endo	Peri / St	80	FLT1 complex_VEGFA	0.877	0.530872	0
Endo	Peri / St	81	NRP2_SEMA3C	0.423	0.256053	0
Endo	Peri / St	82	FLT1_VEGFB	0.937	0.567191	0
Endo	Peri / St	83	FLT1_VEGFA	0.904	0.547215	0
Endo	Peri / St	84	NRP1_VEGFB	1	0.605327	0
Endo	S1	16	HBEGF_EGFR	0.232	0.140436	0
Endo	S1	44	NRP1_VEGFA	1.083	0.655569	0
Endo	S1	58	CD74_MIF	1.405	0.850484	0
Endo	S1	74	JAM2_JAM3	0.268	0.162228	0
Endo	S1	77	FLT1 complex_VEGFB	0.874	0.529056	0
Endo	S1	78	KDR_VEGFA	0.993	0.60109	0
Endo	S1	79	NRP2_VEGFA	0.369	0.223366	0
Endo	S1	80	FLT1 complex_VEGFA	0.993	0.60109	0
Endo	S1	82	FLT1_VEGFB	0.901	0.5454	0
Endo	S1	83	FLT1_VEGFA	1.02	0.617433	0
Endo	S1	84	NRP1_VEGFB	0.964	0.583535	0
Endo	S3	13	GAS6_MERTK	0.813	0.492131	0
Endo	S3	16	HBEGF_EGFR	0.216	0.130751	0
Endo	S3	44	NRP1_VEGFA	1.126	0.681598	0
Endo	S3	69	F11R_BDNF	0.512	0.309927	0
Endo	S3	73	TNFSF12_TNFRSF12A	0.144	0.0871671	0
Endo	S3	77	FLT1 complex_VEGFB	0.842	0.509685	0
Endo	S3	78	KDR_VEGFA	1.037	0.627724	0
Endo	S3	79	NRP2_VEGFA	0.412	0.249395	0
Endo	S3	80	FLT1 complex_VEGFA	1.037	0.627724	0
Endo	S3	81	NRP2_SEMA3C	0.296	0.179177	0
Endo	S3	82	FLT1_VEGFB	0.869	0.526029	0
Endo	S3	83	FLT1_VEGFA	1.064	0.644068	0
Endo	S3	84	NRP1_VEGFB	0.932	0.564165	0
Ly	Prolif cells	13	GAS6_MERTK	1.182	0.470167	0
Ly	Prolif cells	26	GRN_TNFRSF1A	0.815	0.324185	0
Ly	Prolif cells	45	TGFbeta receptor1_TGFB1	0.561	0.22315	0
Ly	Prolif cells	47	ADRB2_VEGFB	0.768	0.305489	0
Ly	Prolif cells	59	a4b1 complex_SPP1	1.194	0.47494	0
Ly	Prolif cells	73	TNFSF12_TNFRSF12A	0.591	0.235084	0
Ly	Prolif cells	74	JAM2_JAM3	0.531	0.211217	0
Ly	Prolif cells	82	FLT1_VEGFB	1.099	0.437152	0
Ly	Prolif cells	83	FLT1_VEGFA	1.156	0.459825	0
Ly	Prolif cells	100	EFNA4_EPHA4	0.271	0.107796	0
Ly	Prolif cells	115	a1b1 complex_COL8A1	0.408	0.162291	0
Ly	Prolif cells	116	PTPRZ1_MDK	0.9	0.357995	0
Ly	Prolif cells	118	FGFR1_NCAM1	0.338	0.134447	0
Ly	Prolif cells	120	a1b1 complex_COL4A5	0.336	0.133652	0
Ly	Prolif cells	122	a1b1 complex_COL4A3	0.501	0.199284	0
Ly	Prolif cells	123	a1b1 complex_COL4A4	0.654	0.260143	0
Ly	Prolif cells	124	a1b1 complex_COL4A2	0.39	0.155131	0
Ly	Prolif cells	126	a1b1 complex_COL18A1	0.419	0.166667	0
Ly	Prolif cells	127	a1b1 complex_COL4A1	0.488	0.194113	0
Ly	Endo	7	IL15_IL15RA	0.366	0.145585	0
Ly	Endo	13	GAS6_MERTK	1.173	0.466587	0
Ly	Endo	17	EGFR_TGFB1	0.496	0.197295	0
Ly	Endo	23	a6b1 complex_LAMC1	0.768	0.305489	0
Ly	Endo	26	GRN_TNFRSF1A	1.091	0.43397	0
Ly	Endo	45	TGFbeta receptor1_TGFB1	0.787	0.313047	0
Ly	Endo	59	a4b1 complex_SPP1	0.766	0.304694	0
Ly	Endo	63	RIF1_NOTCH1	0.442	0.175815	0
Ly	Endo	74	JAM2_JAM3	0.622	0.247414	0
Ly	Endo	83	FLT1_VEGFA	1.062	0.422434	0
Ly	Endo	100	EFNA4_EPHA4	0.303	0.120525	0
Ly	Endo	111	VEGFC_FLT4	0.323	0.128481	0
Ly	Endo	112	NOV_NOTCH1	0.442	0.175815	0
Ly	Endo	114	a1b1 complex_COL15A1	0.392	0.155927	0
Ly	Endo	119	WNT2_FZD4	0.409	0.162689	0
Ly	Endo	121	a1b1 complex_COL27A1	0.362	0.143994	0
Ly	Endo	124	a1b1 complex_COL4A2	0.519	0.206444	0
Ly	Endo	125	TSLPR_CRLF2	0.474	0.188544	0
Ly	Endo	126	a1b1 complex_COL18A1	0.419	0.166667	0
Ly	Endo	127	a1b1 complex_COL4A1	0.741	0.294749	0
Ly	Ly	15	aVb1 complex_FN1	0.936	0.372315	0
Ly	Ly	20	GRN_TNFRSF1B	1	0.397772	0
Ly	Ly	26	GRN_TNFRSF1A	0.934	0.371519	0
Ly	Ly	40	aVb5 complex_FN1	0.581	0.231106	0
Ly	Ly	53	a4b7 complex_FN1	0.631	0.250994	0
Ly	Ly	54	a4b1 complex_FN1	0.631	0.250994	0
Ly	Ly	55	CD52_SIGLEC10	1.065	0.423628	0
Ly	Ly	74	JAM2_JAM3	0.645	0.256563	0
Ly	Ly	76	CX3CL1_CX3CR1	0.912	0.362768	0
Ly	Ly	98	EFNA4_EPHA2	0.564	0.224344	0
Ly	Ly	100	EFNA4_EPHA4	0.448	0.178202	0
Ly	Ly	111	VEGFC_FLT4	0.448	0.178202	0
Ly	Ly	115	a1b1 complex_COL8A1	0.712	0.283214	0
Ly	Ly	117	a1b1 complex_COL5A2	0.581	0.231106	0
Ly	Ly	121	a1b1 complex_COL27A1	0.515	0.204853	0
Ly	Ly	125	TSLPR_CRLF2	0.985	0.391806	0
Ly	Ly	127	a1b1 complex_COL4A1	1.277	0.507955	0
Ly	Mp-DC+Dendritic cells	5	JAM3_aMb2 complex	0.321	0.127685	0
Ly	Mp-DC+Dendritic cells	14	GAS6_AXL	1.172	0.466189	0
Ly	Mp-DC+Dendritic cells	15	aVb1 complex_FN1	0.779	0.309865	0
Ly	Mp-DC+Dendritic cells	17	EGFR_TGFB1	0.715	0.284407	0
Ly	Mp-DC+Dendritic cells	20	GRN_TNFRSF1B	0.797	0.317025	0
Ly	Mp-DC+Dendritic cells	26	GRN_TNFRSF1A	0.896	0.356404	0
Ly	Mp-DC+Dendritic cells	40	aVb5 complex_FN1	0.424	0.168656	0
Ly	Mp-DC+Dendritic cells	45	TGFbeta receptor1_TGFB1	1.005	0.399761	0
Ly	Mp-DC+Dendritic cells	50	CCL15_CCR1	0.376	0.149562	0
Ly	Mp-DC+Dendritic cells	53	a4b7 complex_FN1	0.474	0.188544	0
Ly	Mp-DC+Dendritic cells	54	a4b1 complex_FN1	0.474	0.188544	0
Ly	Mp-DC+Dendritic cells	55	CD52_SIGLEC10	1.16	0.461416	0
Ly	Mp-DC+Dendritic cells	59	a4b1 complex_SPP1	0.479	0.190533	0
Ly	Mp-DC+Dendritic cells	70	PROS1_AXL	0.298	0.118536	0
Ly	Mp-DC+Dendritic cells	76	CX3CL1_CX3CR1	0.428	0.170247	0
Ly	Mp-DC+Dendritic cells	125	TSLPR_CRLF2	0.602	0.239459	0
Ly	Ne	5	JAM3_aMb2 complex	0.325	0.129276	0
Ly	Ne	17	EGFR_TGFB1	0.325	0.129276	0
Ly	Ne	26	GRN_TNFRSF1A	0.864	0.343675	0
Ly	Ne	45	TGFbeta receptor1_TGFB1	0.616	0.245028	0
Ly	Ne	59	a4b1 complex_SPP1	1.025	0.407717	0
Ly	Ne	76	CX3CL1_CX3CR1	0.392	0.155927	0
Ly	Ne	83	FLT1_VEGFA	1.408	0.560064	0
Ly	Ne	95	EFNA4_EPHA1	0.378	0.150358	0
Ly	Ne	109	a1b1 complex_COL16A1	0.445	0.177009	0
Ly	Ne	116	PTPRZ1_MDK	0.445	0.177009	0
Ly	Ne	121	a1b1 complex_COL27A1	0.445	0.177009	0
Ly	Ne	122	a1b1 complex_COL4A3	0.546	0.217184	0
Ly	Ne	123	a1b1 complex_COL4A4	0.989	0.393397	0
Ly	Ne	126	a1b1 complex_COL18A1	0.482	0.191726	0
Ly	Peri / St	7	IL15_IL15RA	0.361	0.143596	0
Ly	Peri / St	14	GAS6_AXL	1.173	0.466587	0
Ly	Peri / St	22	SEMA4D_PLXNB1	0.767	0.305091	0
Ly	Peri / St	23	a6b1 complex_LAMC1	0.698	0.277645	0
Ly	Peri / St	26	GRN_TNFRSF1A	0.867	0.344869	0
Ly	Peri / St	47	ADRB2_VEGFB	0.771	0.306683	0
Ly	Peri / St	52	a4b1 complex_TNC	0.475	0.188942	0
Ly	Peri / St	59	a4b1 complex_SPP1	2.093	0.832538	0
Ly	Peri / St	61	ROR1_WNT5A	0.324	0.128878	0
Ly	Peri / St	70	PROS1_AXL	0.299	0.118934	0
Ly	Peri / St	73	TNFSF12_TNFRSF12A	0.738	0.293556	0
Ly	Peri / St	82	FLT1_VEGFB	1.102	0.438345	0
Ly	Peri / St	83	FLT1_VEGFA	1.068	0.424821	0
Ly	Peri / St	86	EFNA4_EPHA7	0.306	0.121718	0
Ly	Peri / St	98	EFNA4_EPHA2	0.296	0.117741	0
Ly	Peri / St	110	WNT2_FZD3	0.278	0.110581	0
Ly	Peri / St	113	TSLPR_TSLP	0.436	0.173429	0
Ly	Peri / St	116	PTPRZ1_MDK	0.393	0.156325	0
Ly	Peri / St	118	FGFR1_NCAM1	0.64	0.254574	0
Ly	Peri / St	119	WNT2_FZD4	0.552	0.21957	0
Ly	Peri / St	120	a1b1 complex_COL4A5	0.424	0.168656	0
Ly	Peri / St	122	a1b1 complex_COL4A3	0.508	0.202068	0
Ly	Peri / St	123	a1b1 complex_COL4A4	0.645	0.256563	0
Ly	Peri / St	124	a1b1 complex_COL4A2	0.55	0.218775	0
Ly	Peri / St	125	TSLPR_CRLF2	0.407	0.161893	0
Ly	Peri / St	126	a1b1 complex_COL18A1	1.081	0.429992	0
Ly	Peri / St	127	a1b1 complex_COL4A1	0.748	0.297534	0
Ly	S1	47	ADRB2_VEGFB	0.736	0.292761	0
Ly	S1	59	a4b1 complex_SPP1	1.364	0.542562	0
Ly	S1	74	JAM2_JAM3	0.54	0.214797	0
Ly	S1	82	FLT1_VEGFB	1.066	0.424025	0
Ly	S1	83	FLT1_VEGFA	1.185	0.47136	0
Ly	S1	116	PTPRZ1_MDK	0.586	0.233095	0
Ly	S1	121	a1b1 complex_COL27A1	0.503	0.20008	0
Ly	S1	122	a1b1 complex_COL4A3	0.56	0.222753	0
Ly	S1	123	a1b1 complex_COL4A4	0.597	0.23747	0
Ly	S1	124	a1b1 complex_COL4A2	0.36	0.143198	0
Ly	S1	126	a1b1 complex_COL18A1	0.365	0.145187	0
Ly	S1	127	a1b1 complex_COL4A1	0.391	0.155529	0
Ly	S3	13	GAS6_MERTK	1.168	0.464598	0
Ly	S3	47	ADRB2_VEGFB	0.704	0.280032	0
Ly	S3	59	a4b1 complex_SPP1	0.482	0.191726	0
Ly	S3	73	TNFSF12_TNFRSF12A	0.563	0.223946	0
Ly	S3	82	FLT1_VEGFB	1.034	0.411297	0
Ly	S3	83	FLT1_VEGFA	1.229	0.488862	0
Ly	S3	116	PTPRZ1_MDK	0.374	0.148767	0
Ly	S3	121	a1b1 complex_COL27A1	0.447	0.177804	0
Ly	S3	122	a1b1 complex_COL4A3	0.665	0.264519	0
Ly	S3	123	a1b1 complex_COL4A4	0.658	0.261734	0
Ly	S3	124	a1b1 complex_COL4A2	0.374	0.148767	0
Ly	S3	127	a1b1 complex_COL4A1	0.378	0.150358	0
Mp-DC+Dendritic cells	Prolif cells	26	GRN_TNFRSF1A	0.452	0.114084	0
Mp-DC+Dendritic cells	Prolif cells	47	ADRB2_VEGFB	0.264	0.066633	0
Mp-DC+Dendritic cells	Prolif cells	57	PLAUR_a4b1 complex	0.182	0.0459364	0
Mp-DC+Dendritic cells	Prolif cells	58	CD74_MIF	3.592	0.906613	0
Mp-DC+Dendritic cells	Prolif cells	59	a4b1 complex_SPP1	1.063	0.268299	0
Mp-DC+Dendritic cells	Endo	23	a6b1 complex_LAMC1	0.243	0.0613327	0
Mp-DC+Dendritic cells	Endo	26	GRN_TNFRSF1A	0.727	0.183493	0
Mp-DC+Dendritic cells	Endo	45	TGFbeta receptor1_TGFB1	0.354	0.0893488	0
Mp-DC+Dendritic cells	Endo	56	RIPK1_TNFSF10	0.324	0.0817769	0
Mp-DC+Dendritic cells	Endo	58	CD74_MIF	2.987	0.753912	0
Mp-DC+Dendritic cells	Ly	15	aVb1 complex_FN1	0.412	0.103988	0
Mp-DC+Dendritic cells	Ly	20	GRN_TNFRSF1B	0.637	0.160777	0
Mp-DC+Dendritic cells	Ly	25	SPP1_CD44	0.784	0.19788	0
Mp-DC+Dendritic cells	Ly	53	a4b7 complex_FN1	0.5	0.126199	0
Mp-DC+Dendritic cells	Ly	54	a4b1 complex_FN1	0.5	0.126199	0
Mp-DC+Dendritic cells	Ly	55	CD52_SIGLEC10	1.764	0.44523	0
Mp-DC+Dendritic cells	Ly	57	PLAUR_a4b1 complex	0.457	0.115346	0
Mp-DC+Dendritic cells	Ly	58	CD74_MIF	3.196	0.806663	0
Mp-DC+Dendritic cells	Mp-DC+Dendritic cells	15	aVb1 complex_FN1	0.254	0.064109	0
Mp-DC+Dendritic cells	Mp-DC+Dendritic cells	20	GRN_TNFRSF1B	0.434	0.109541	0
Mp-DC+Dendritic cells	Mp-DC+Dendritic cells	26	GRN_TNFRSF1A	0.532	0.134276	0
Mp-DC+Dendritic cells	Mp-DC+Dendritic cells	45	TGFbeta receptor1_TGFB1	0.573	0.144624	0
Mp-DC+Dendritic cells	Mp-DC+Dendritic cells	49	FCER2_aMb2 complex	0.405	0.102221	0
Mp-DC+Dendritic cells	Mp-DC+Dendritic cells	50	CCL15_CCR1	0.485	0.122413	0
Mp-DC+Dendritic cells	Mp-DC+Dendritic cells	53	a4b7 complex_FN1	0.342	0.08632	0
Mp-DC+Dendritic cells	Mp-DC+Dendritic cells	54	a4b1 complex_FN1	0.342	0.08632	0
Mp-DC+Dendritic cells	Mp-DC+Dendritic cells	55	CD52_SIGLEC10	1.859	0.469207	0
Mp-DC+Dendritic cells	Mp-DC+Dendritic cells	57	PLAUR_a4b1 complex	0.326	0.0822817	0
Mp-DC+Dendritic cells	Mp-DC+Dendritic cells	58	CD74_MIF	2.919	0.736749	0
Mp-DC+Dendritic cells	Ne	25	SPP1_CD44	0.425	0.107269	0
Mp-DC+Dendritic cells	Ne	26	GRN_TNFRSF1A	0.501	0.126451	0
Mp-DC+Dendritic cells	Ne	48	aMb2 complex_F10	0.199	0.0502272	0
Mp-DC+Dendritic cells	Ne	49	FCER2_aMb2 complex	0.409	0.103231	0
Mp-DC+Dendritic cells	Ne	51	aMb2 complex_C3	0.307	0.0774861	0
Mp-DC+Dendritic cells	Ne	56	RIPK1_TNFSF10	0.353	0.0890964	0
Mp-DC+Dendritic cells	Ne	57	PLAUR_a4b1 complex	0.326	0.0822817	0
Mp-DC+Dendritic cells	Ne	58	CD74_MIF	3.256	0.821807	0
Mp-DC+Dendritic cells	Peri / St	22	SEMA4D_PLXNB1	0.321	0.0810197	0
Mp-DC+Dendritic cells	Peri / St	26	GRN_TNFRSF1A	0.504	0.127208	0
Mp-DC+Dendritic cells	Peri / St	47	ADRB2_VEGFB	0.267	0.0673902	0
Mp-DC+Dendritic cells	Peri / St	51	aMb2 complex_C3	0.399	0.100707	0
Mp-DC+Dendritic cells	Peri / St	52	a4b1 complex_TNC	0.344	0.0868248	0
Mp-DC+Dendritic cells	Peri / St	58	CD74_MIF	3.16	0.797577	0
Mp-DC+Dendritic cells	Peri / St	59	a4b1 complex_SPP1	1.962	0.495204	0
Mp-DC+Dendritic cells	S1	47	ADRB2_VEGFB	0.231	0.0583039	0
Mp-DC+Dendritic cells	S1	58	CD74_MIF	3.715	0.937658	0
Mp-DC+Dendritic cells	S1	59	a4b1 complex_SPP1	1.233	0.311206	0
Mp-DC+Dendritic cells	S3	47	ADRB2_VEGFB	0.199	0.0502272	0
Mp-DC+Dendritic cells	S3	56	RIPK1_TNFSF10	0.113	0.0285209	0
Mp-DC+Dendritic cells	S3	58	CD74_MIF	3.391	0.855881	0
Ne	Prolif cells	26	GRN_TNFRSF1A	0.783	0.399083	0
Ne	Prolif cells	47	ADRB2_VEGFB	0.393	0.200306	0
Ne	Prolif cells	59	a4b1 complex_SPP1	1.063	0.541794	0
Ne	Endo	17	EGFR_TGFB1	0.463	0.235984	0
Ne	Endo	23	a6b1 complex_LAMC1	0.523	0.266565	0
Ne	Endo	26	GRN_TNFRSF1A	1.058	0.539246	0
Ne	Endo	59	a4b1 complex_SPP1	0.635	0.323649	0
Ne	Ly	12	CLEC2D_FAM3C	1.027	0.523445	0
Ne	Ly	15	aVb1 complex_FN1	0.691	0.352192	0
Ne	Ly	19	IGF1R_IGF1	0.822	0.41896	0
Ne	Ly	20	GRN_TNFRSF1B	0.968	0.493374	0
Ne	Ly	25	SPP1_CD44	1.331	0.678389	0
Ne	Ly	26	GRN_TNFRSF1A	0.901	0.459225	0
Ne	Ly	37	BMP4_BMPR1B_BMPR2	0.445	0.226809	0
Ne	Ly	38	BMP4_BMR1B_AVR2A	0.445	0.226809	0
Ne	Ly	39	BMP4_BMR1B_AVR2B	0.445	0.226809	0
Ne	Ly	53	a4b7 complex_FN1	0.5	0.254842	0
Ne	Ly	54	a4b1 complex_FN1	0.5	0.254842	0
Ne	Ly	55	CD52_SIGLEC10	0.48	0.244648	0
Ne	Ly	108	TNFSF13B_TNFRSF13B	0.732	0.373089	0
Ne	Mp-DC+Dendritic cells	15	aVb1 complex_FN1	0.534	0.272171	0
Ne	Mp-DC+Dendritic cells	17	EGFR_TGFB1	0.682	0.347604	0
Ne	Mp-DC+Dendritic cells	20	GRN_TNFRSF1B	0.764	0.389399	0
Ne	Mp-DC+Dendritic cells	26	GRN_TNFRSF1A	0.863	0.439857	0
Ne	Mp-DC+Dendritic cells	50	CCL15_CCR1	0.295	0.150357	0
Ne	Mp-DC+Dendritic cells	53	a4b7 complex_FN1	0.343	0.174822	0
Ne	Mp-DC+Dendritic cells	54	a4b1 complex_FN1	0.343	0.174822	0
Ne	Mp-DC+Dendritic cells	55	CD52_SIGLEC10	0.575	0.293068	0
Ne	Mp-DC+Dendritic cells	59	a4b1 complex_SPP1	0.348	0.17737	0
Ne	Mp-DC+Dendritic cells	105	CCL18_CCR1	0.42	0.214067	0
Ne	Mp-DC+Dendritic cells	106	TNFSF13B_CD40	0.211	0.107543	0
Ne	Mp-DC+Dendritic cells	107	TNFSF13B_TNFRSF13C	0.338	0.172273	0
Ne	Mp-DC+Dendritic cells	108	TNFSF13B_TNFRSF13B	0.38	0.19368	0
Ne	Ne	17	EGFR_TGFB1	0.293	0.149337	0
Ne	Ne	25	SPP1_CD44	0.972	0.495413	0
Ne	Ne	26	GRN_TNFRSF1A	0.832	0.424057	0
Ne	Ne	48	aMb2 complex_F10	0.203	0.103466	0
Ne	Ne	51	aMb2 complex_C3	0.311	0.158512	0
Ne	Ne	59	a4b1 complex_SPP1	0.895	0.456167	0
Ne	Peri / St	2	FcRn complex_ALB	0.513	0.261468	0
Ne	Peri / St	14	GAS6_AXL	0.564	0.287462	0
Ne	Peri / St	23	a6b1 complex_LAMC1	0.454	0.231397	0
Ne	Peri / St	26	GRN_TNFRSF1A	0.835	0.425586	0
Ne	Peri / St	47	ADRB2_VEGFB	0.396	0.201835	0
Ne	Peri / St	51	aMb2 complex_C3	0.403	0.205403	0
Ne	Peri / St	52	a4b1 complex_TNC	0.344	0.175331	0
Ne	Peri / St	59	a4b1 complex_SPP1	1.962	1	0
Ne	S1	47	ADRB2_VEGFB	0.36	0.183486	0
Ne	S1	59	a4b1 complex_SPP1	1.233	0.62844	0
Ne	S3	47	ADRB2_VEGFB	0.329	0.167686	0
Ne	S3	59	a4b1 complex_SPP1	0.351	0.178899	0
Peri / St	Prolif cells	26	GRN_TNFRSF1A	0.37	0.154295	0
Peri / St	Prolif cells	33	BMP4_BMR1A_ACR2A	0.212	0.088407	0
Peri / St	Prolif cells	34	CXCL12_DPP4	0.268	0.11176	0
Peri / St	Prolif cells	35	CXCL12_ACKR3	0.295	0.123019	0
Peri / St	Prolif cells	46	BMP4_BMPR1A_BMPR2	0.298	0.12427	0
Peri / St	Prolif cells	57	PLAUR_a4b1 complex	0.19	0.0792327	0
Peri / St	Prolif cells	58	CD74_MIF	1.351	0.563386	0
Peri / St	Prolif cells	73	TNFSF12_TNFRSF12A	0.16	0.0667223	0
Peri / St	Prolif cells	81	NRP2_SEMA3C	0.191	0.0796497	0
Peri / St	Prolif cells	88	WNT5A_FZD5	0.146	0.0608841	0
Peri / St	Prolif cells	93	BMP3_ACVR_1B2A receptor	0.176	0.0733945	0
Peri / St	Prolif cells	94	BMP2_BMR1A_ACR2A	0.117	0.0487907	0
Peri / St	Prolif cells	99	WNT7B_FZD1	0.235	0.0979983	0
Peri / St	Prolif cells	100	EFNA4_EPHA4	0.135	0.0562969	0
Peri / St	Prolif cells	102	BMP2_BMPR1A_BMPR2	0.203	0.0846539	0
Peri / St	Prolif cells	103	FGFR2_FGFR3	0.166	0.0692244	0
Peri / St	Prolif cells	104	TGFBR3_TGFB1	0.155	0.0646372	0
Peri / St	Endo	19	IGF1R_IGF1	0.484	0.201835	0
Peri / St	Endo	23	a6b1 complex_LAMC1	0.583	0.243119	0
Peri / St	Endo	24	aVb6 complex_TGFB1	0.494	0.206005	0
Peri / St	Endo	26	GRN_TNFRSF1A	0.645	0.268974	0
Peri / St	Endo	56	RIPK1_TNFSF10	0.33	0.137615	0
Peri / St	Endo	62	PDGFC_FLT4	0.197	0.0821518	0
Peri / St	Endo	63	RIF1_NOTCH1	0.264	0.110092	0
Peri / St	Endo	75	NRP2_SEMA3F	0.246	0.102585	0
Peri / St	Endo	87	ANGPT2_TEK	0.758	0.316097	0
Peri / St	Endo	96	WNT4_FZD6	0.157	0.0654712	0
Peri / St	Endo	97	WNT5A_FZD6	0.186	0.0775646	0
Peri / St	Endo	100	EFNA4_EPHA4	0.166	0.0692244	0
Peri / St	Endo	101	WNT7B_FZD4	0.261	0.108841	0
Peri / St	Endo	104	TGFBR3_TGFB1	0.381	0.158882	0
Peri / St	Ly	6	FGF1_FGFR1	0.451	0.188073	0
Peri / St	Ly	15	aVb1 complex_FN1	0.751	0.313178	0
Peri / St	Ly	18	HBEGF_CD44	0.764	0.318599	0
Peri / St	Ly	19	IGF1R_IGF1	1.001	0.417431	0
Peri / St	Ly	20	GRN_TNFRSF1B	0.555	0.231443	0
Peri / St	Ly	25	SPP1_CD44	2.398	1	0
Peri / St	Ly	31	CXCL12_CXCR3	0.402	0.16764	0
Peri / St	Ly	36	FGF1_FGFR3	0.451	0.188073	0
Peri / St	Ly	37	BMP4_BMPR1B_BMPR2	0.455	0.189741	0
Peri / St	Ly	38	BMP4_BMR1B_AVR2A	0.455	0.189741	0
Peri / St	Ly	39	BMP4_BMR1B_AVR2B	0.455	0.189741	0
Peri / St	Ly	40	aVb5 complex_FN1	0.44	0.183486	0
Peri / St	Ly	55	CD52_SIGLEC10	0.288	0.1201	0
Peri / St	Ly	57	PLAUR_a4b1 complex	0.464	0.193495	0
Peri / St	Ly	62	PDGFC_FLT4	0.322	0.134279	0
Peri / St	Ly	71	a3b1 complex_FN1	0.412	0.17181	0
Peri / St	Ly	75	NRP2_SEMA3F	0.397	0.165555	0
Peri / St	Ly	87	ANGPT2_TEK	1.01	0.421184	0
Peri / St	Ly	89	IL34_CSF1R	0.759	0.316514	0
Peri / St	Ly	90	BMP2_BMR1B_AVR2A	0.36	0.150125	0
Peri / St	Ly	91	BMP2_BMPR1B_BMPR2	0.36	0.150125	0
Peri / St	Ly	92	BMP2_BMR1B_AVR2B	0.36	0.150125	0
Peri / St	Ly	96	WNT4_FZD6	0.362	0.150959	0
Peri / St	Ly	97	WNT5A_FZD6	0.391	0.163053	0
Peri / St	Ly	98	EFNA4_EPHA2	0.428	0.178482	0
Peri / St	Ly	100	EFNA4_EPHA4	0.311	0.129691	0
Peri / St	Ly	103	FGFR2_FGFR3	0.388	0.161802	0
Peri / St	Mp-DC+Dendritic cells	14	GAS6_AXL	0.543	0.226439	0
Peri / St	Mp-DC+Dendritic cells	15	aVb1 complex_FN1	0.594	0.247706	0
Peri / St	Mp-DC+Dendritic cells	18	HBEGF_CD44	0.324	0.135113	0
Peri / St	Mp-DC+Dendritic cells	20	GRN_TNFRSF1B	0.352	0.146789	0
Peri / St	Mp-DC+Dendritic cells	24	aVb6 complex_TGFB1	0.712	0.296914	0
Peri / St	Mp-DC+Dendritic cells	25	SPP1_CD44	1.958	0.816514	0
Peri / St	Mp-DC+Dendritic cells	26	GRN_TNFRSF1A	0.45	0.187656	0
Peri / St	Mp-DC+Dendritic cells	27	CXCL12_CXCR4	0.319	0.133028	0
Peri / St	Mp-DC+Dendritic cells	34	CXCL12_DPP4	0.296	0.123436	0
Peri / St	Mp-DC+Dendritic cells	40	aVb5 complex_FN1	0.283	0.118015	0
Peri / St	Mp-DC+Dendritic cells	55	CD52_SIGLEC10	0.383	0.159716	0
Peri / St	Mp-DC+Dendritic cells	57	PLAUR_a4b1 complex	0.333	0.138866	0
Peri / St	Mp-DC+Dendritic cells	71	a3b1 complex_FN1	0.255	0.106339	0
Peri / St	Mp-DC+Dendritic cells	89	IL34_CSF1R	0.448	0.186822	0
Peri / St	Mp-DC+Dendritic cells	104	TGFBR3_TGFB1	0.6	0.250209	0
Peri / St	Ne	18	HBEGF_CD44	0.405	0.168891	0
Peri / St	Ne	25	SPP1_CD44	2.039	0.850292	0
Peri / St	Ne	27	CXCL12_CXCR4	0.332	0.138449	0
Peri / St	Ne	34	CXCL12_DPP4	0.369	0.153878	0
Peri / St	Ne	56	RIPK1_TNFSF10	0.359	0.149708	0
Peri / St	Ne	57	PLAUR_a4b1 complex	0.334	0.139283	0
Peri / St	Ne	79	NRP2_VEGFA	0.553	0.230609	0
Peri / St	Ne	89	IL34_CSF1R	0.29	0.120934	0
Peri / St	Ne	95	EFNA4_EPHA1	0.242	0.100917	0
Peri / St	Peri / St	4	aVb6 complex_TNC	0.357	0.148874	0
Peri / St	Peri / St	14	GAS6_AXL	0.544	0.226856	0
Peri / St	Peri / St	19	IGF1R_IGF1	0.515	0.214762	0
Peri / St	Peri / St	22	SEMA4D_PLXNB1	0.195	0.0813178	0
Peri / St	Peri / St	23	a6b1 complex_LAMC1	0.514	0.214345	0
Peri / St	Peri / St	26	GRN_TNFRSF1A	0.422	0.17598	0
Peri / St	Peri / St	35	CXCL12_ACKR3	0.439	0.183069	0
Peri / St	Peri / St	41	FGF1_FGFR2	0.257	0.107173	0
Peri / St	Peri / St	46	BMP4_BMPR1A_BMPR2	0.306	0.127606	0
Peri / St	Peri / St	73	TNFSF12_TNFRSF12A	0.308	0.12844	0
Peri / St	Peri / St	75	NRP2_SEMA3F	0.173	0.0721435	0
Peri / St	Peri / St	81	NRP2_SEMA3C	0.384	0.160133	0
Peri / St	Peri / St	85	WNT5A_FZD3	0.154	0.0642202	0
Peri / St	Peri / St	86	EFNA4_EPHA7	0.17	0.0708924	0
Peri / St	Peri / St	89	IL34_CSF1R	0.431	0.179733	0
Peri / St	Peri / St	98	EFNA4_EPHA2	0.16	0.0667223	0
Peri / St	Peri / St	101	WNT7B_FZD4	0.403	0.168057	0
Peri / St	Peri / St	102	BMP2_BMPR1A_BMPR2	0.211	0.08799	0
Peri / St	S1	16	HBEGF_EGFR	0.202	0.0842369	0
Peri / St	S1	34	CXCL12_DPP4	0.235	0.0979983	0
Peri / St	S1	35	CXCL12_ACKR3	0.287	0.119683	0
Peri / St	S1	46	BMP4_BMPR1A_BMPR2	0.221	0.0921601	0
Peri / St	S1	58	CD74_MIF	1.475	0.615096	0
Peri / St	S1	79	NRP2_VEGFA	0.33	0.137615	0
Peri / St	S1	99	WNT7B_FZD1	0.139	0.057965	0
Peri / St	S1	102	BMP2_BMPR1A_BMPR2	0.126	0.0525438	0
Peri / St	S1	103	FGFR2_FGFR3	0.156	0.0650542	0
Peri / St	S3	34	CXCL12_DPP4	0.261	0.108841	0
Peri / St	S3	35	CXCL12_ACKR3	0.296	0.123436	0
Peri / St	S3	44	NRP1_VEGFA	0.419	0.174729	0
Peri / St	S3	46	BMP4_BMPR1A_BMPR2	0.229	0.0954962	0
Peri / St	S3	56	RIPK1_TNFSF10	0.118	0.0492077	0
Peri / St	S3	69	F11R_BDNF	0.362	0.150959	0
Peri / St	S3	73	TNFSF12_TNFRSF12A	0.132	0.0550459	0
Peri / St	S3	79	NRP2_VEGFA	0.373	0.155546	0
Peri / St	S3	81	NRP2_SEMA3C	0.257	0.107173	0
Peri / St	S3	99	WNT7B_FZD1	0.147	0.0613011	0
Peri / St	S3	102	BMP2_BMPR1A_BMPR2	0.134	0.0558799	0
Peri / St	S3	103	FGFR2_FGFR3	0.165	0.0688073	0
S1	Prolif cells	13	GAS6_MERTK	0.549	0.328939	0
S1	Endo	1	ANGPT1_TEK	0.573	0.343319	0
S1	Endo	7	IL15_IL15RA	0.141	0.0844817	0
S1	Endo	12	CLEC2D_FAM3C	0.646	0.387058	0
S1	Endo	13	GAS6_MERTK	0.54	0.323547	0
S1	Endo	17	EGFR_TGFB1	0.355	0.212702	0
S1	Endo	19	IGF1R_IGF1	0.383	0.229479	0
S1	Endo	23	a6b1 complex_LAMC1	0.206	0.123427	0
S1	Endo	24	aVb6 complex_TGFB1	0.45	0.269623	0
S1	Endo	26	GRN_TNFRSF1A	0.555	0.332534	0
S1	Ly	1	ANGPT1_TEK	0.824	0.493709	0
S1	Ly	6	FGF1_FGFR1	0.37	0.22169	0
S1	Ly	8	BMP7_BMR1B_AVR2B	0.351	0.210306	0
S1	Ly	9	BMP7_BMR1B_AVR2A	0.351	0.210306	0
S1	Ly	11	BMP7_BMPR1B_BMPR2	0.351	0.210306	0
S1	Ly	12	CLEC2D_FAM3C	1.277	0.765129	0
S1	Ly	15	aVb1 complex_FN1	0.374	0.224086	0
S1	Ly	18	HBEGF_CD44	0.716	0.428999	0
S1	Ly	19	IGF1R_IGF1	0.9	0.539245	0
S1	Ly	20	GRN_TNFRSF1B	0.465	0.27861	0
S1	Ly	25	SPP1_CD44	1.669	1	0
S1	Mp-DC+Dendritic cells	5	JAM3_aMb2 complex	0.216	0.129419	0
S1	Mp-DC+Dendritic cells	12	CLEC2D_FAM3C	0.635	0.380467	0
S1	Mp-DC+Dendritic cells	14	GAS6_AXL	0.539	0.322948	0
S1	Mp-DC+Dendritic cells	15	aVb1 complex_FN1	0.217	0.130018	0
S1	Mp-DC+Dendritic cells	17	EGFR_TGFB1	0.574	0.343919	0
S1	Mp-DC+Dendritic cells	18	HBEGF_CD44	0.276	0.165368	0
S1	Mp-DC+Dendritic cells	20	GRN_TNFRSF1B	0.261	0.156381	0
S1	Mp-DC+Dendritic cells	24	aVb6 complex_TGFB1	0.668	0.40024	0
S1	Mp-DC+Dendritic cells	25	SPP1_CD44	1.229	0.736369	0
S1	Mp-DC+Dendritic cells	26	GRN_TNFRSF1A	0.36	0.215698	0
S1	Ne	5	JAM3_aMb2 complex	0.22	0.131815	0
S1	Ne	18	HBEGF_CD44	0.357	0.213901	0
S1	Ne	25	SPP1_CD44	1.31	0.784901	0
S1	Peri / St	2	FcRn complex_ALB	0.346	0.20731	0
S1	Peri / St	3	FZD1_WNT5A	0.164	0.0982624	0
S1	Peri / St	4	aVb6 complex_TNC	0.313	0.187537	0
S1	Peri / St	10	TTR_DDR1	0.573	0.343319	0
S1	Peri / St	12	CLEC2D_FAM3C	0.589	0.352906	0
S1	Peri / St	14	GAS6_AXL	0.54	0.323547	0
S1	Peri / St	19	IGF1R_IGF1	0.413	0.247454	0
S1	Peri / St	21	BMP7_BMPR1A_BMPR2	0.202	0.121031	0
S1	Peri / St	22	SEMA4D_PLXNB1	0.238	0.1426	0
S1	Peri / St	26	GRN_TNFRSF1A	0.331	0.198322	0
S1	S1	16	HBEGF_EGFR	0.154	0.0922708	0
S1	S3	10	TTR_DDR1	0.383	0.229479	0
S1	S3	13	GAS6_MERTK	0.535	0.320551	0
S1	S3	16	HBEGF_EGFR	0.138	0.0826842	0
S3	Prolif cells	28	FGF1_FGFR4	0.281	0.287321	0
S3	Prolif cells	33	BMP4_BMR1A_ACR2A	0.14	0.143149	0
S3	Prolif cells	34	CXCL12_DPP4	0.174	0.177914	0
S3	Prolif cells	36	FGF1_FGFR3	0.304	0.310838	0
S3	Prolif cells	42	EFNA1_EPHA4	0.107	0.109407	0
S3	Prolif cells	46	BMP4_BMPR1A_BMPR2	0.227	0.232106	0
S3	Endo	7	IL15_IL15RA	0.16	0.163599	0
S3	Endo	10	TTR_DDR1	0.4	0.408998	0
S3	Endo	17	EGFR_TGFB1	0.34	0.347648	0
S3	Endo	19	IGF1R_IGF1	0.461	0.47137	0
S3	Endo	23	a6b1 complex_LAMC1	0.267	0.273006	0
S3	Endo	24	aVb6 complex_TGFB1	0.528	0.539877	0
S3	Endo	26	GRN_TNFRSF1A	0.588	0.601227	0
S3	Endo	42	EFNA1_EPHA4	0.139	0.142127	0
S3	Endo	45	TGFbeta receptor1_TGFB1	0.329	0.336401	0
S3	Ly	6	FGF1_FGFR1	0.525	0.53681	0
S3	Ly	8	BMP7_BMR1B_AVR2B	0.354	0.361963	0
S3	Ly	9	BMP7_BMR1B_AVR2A	0.354	0.361963	0
S3	Ly	11	BMP7_BMPR1B_BMPR2	0.354	0.361963	0
S3	Ly	12	CLEC2D_FAM3C	0.881	0.900818	0
S3	Ly	15	aVb1 complex_FN1	0.435	0.444785	0
S3	Ly	18	HBEGF_CD44	0.711	0.726994	0
S3	Ly	19	IGF1R_IGF1	0.978	1	0
S3	Ly	20	GRN_TNFRSF1B	0.498	0.509202	0
S3	Ly	25	SPP1_CD44	0.787	0.804703	0
S3	Ly	31	CXCL12_CXCR3	0.308	0.314928	0
S3	Ly	36	FGF1_FGFR3	0.525	0.53681	0
S3	Ly	37	BMP4_BMPR1B_BMPR2	0.383	0.391616	0
S3	Ly	38	BMP4_BMR1B_AVR2A	0.383	0.391616	0
S3	Ly	39	BMP4_BMR1B_AVR2B	0.383	0.391616	0
S3	Ly	40	aVb5 complex_FN1	0.338	0.345603	0
S3	Ly	42	EFNA1_EPHA4	0.284	0.290389	0
S3	Ly	43	EFNA1_EPHA2	0.4	0.408998	0
S3	Mp-DC+Dendritic cells	15	aVb1 complex_FN1	0.278	0.284254	0
S3	Mp-DC+Dendritic cells	17	EGFR_TGFB1	0.559	0.571575	0
S3	Mp-DC+Dendritic cells	18	HBEGF_CD44	0.271	0.277096	0
S3	Mp-DC+Dendritic cells	20	GRN_TNFRSF1B	0.295	0.301636	0
S3	Mp-DC+Dendritic cells	24	aVb6 complex_TGFB1	0.746	0.762781	0
S3	Mp-DC+Dendritic cells	26	GRN_TNFRSF1A	0.393	0.40184	0
S3	Mp-DC+Dendritic cells	27	CXCL12_CXCR4	0.225	0.230061	0
S3	Mp-DC+Dendritic cells	34	CXCL12_DPP4	0.202	0.206544	0
S3	Mp-DC+Dendritic cells	40	aVb5 complex_FN1	0.181	0.185072	0
S3	Mp-DC+Dendritic cells	45	TGFbeta receptor1_TGFB1	0.547	0.559305	0
S3	Ne	18	HBEGF_CD44	0.352	0.359918	0
S3	Ne	25	SPP1_CD44	0.428	0.437628	0
S3	Ne	27	CXCL12_CXCR4	0.238	0.243354	0
S3	Peri / St	2	FcRn complex_ALB	0.405	0.41411	0
S3	Peri / St	3	FZD1_WNT5A	0.172	0.175869	0
S3	Peri / St	4	aVb6 complex_TNC	0.391	0.399796	0
S3	Peri / St	7	IL15_IL15RA	0.154	0.157464	0
S3	Peri / St	10	TTR_DDR1	0.596	0.609407	0
S3	Peri / St	19	IGF1R_IGF1	0.492	0.503067	0
S3	Peri / St	21	BMP7_BMPR1A_BMPR2	0.205	0.209611	0
S3	Peri / St	22	SEMA4D_PLXNB1	0.238	0.243354	0
S3	Peri / St	26	GRN_TNFRSF1A	0.365	0.373211	0
S3	Peri / St	29	EFNA1_EPHA7	0.142	0.145194	0
S3	Peri / St	35	CXCL12_ACKR3	0.346	0.353783	0
S3	Peri / St	41	FGF1_FGFR2	0.332	0.339468	0
S3	Peri / St	43	EFNA1_EPHA2	0.132	0.134969	0
S3	Peri / St	46	BMP4_BMPR1A_BMPR2	0.234	0.239264	0
S3	Peri / St	47	ADRB2_VEGFB	0.2	0.204499	0
S3	S1	10	TTR_DDR1	0.381	0.389571	0
S3	S1	16	HBEGF_EGFR	0.149	0.152352	0
S3	S1	30	NRG1_ERBB3	0.137	0.140082	0
S3	S1	32	NRG1_EGFR	0.139	0.142127	0
S3	S1	34	CXCL12_DPP4	0.141	0.144172	0
S3	S1	35	CXCL12_ACKR3	0.193	0.197342	0
S3	S1	36	FGF1_FGFR3	0.294	0.300613	0
S3	S1	46	BMP4_BMPR1A_BMPR2	0.149	0.152352	0
S3	S1	47	ADRB2_VEGFB	0.165	0.168712	0
S3	S3	10	TTR_DDR1	0.407	0.416155	0
S3	S3	16	HBEGF_EGFR	0.134	0.137014	0
S3	S3	28	FGF1_FGFR4	0.296	0.302658	0
S3	S3	30	NRG1_ERBB3	0.163	0.166667	0
S3	S3	32	NRG1_EGFR	0.124	0.126789	0
S3	S3	34	CXCL12_DPP4	0.167	0.170757	0
S3	S3	35	CXCL12_ACKR3	0.202	0.206544	0
S3	S3	36	FGF1_FGFR3	0.303	0.309816	0
S3	S3	44	NRP1_VEGFA	0.343	0.350716	0
S3	S3	46	BMP4_BMPR1A_BMPR2	0.158	0.161554	0
Prolif cells	Prolif cells	32	NRG1_EGFR	0.234	0.153846	1
Prolif cells	Prolif cells	58	CD74_MIF	1.214	0.798159	1
Prolif cells	Endo	1	ANGPT1_TEK	0.441	0.289941	1
Prolif cells	Endo	12	CLEC2D_FAM3C	0.332	0.218277	1
Prolif cells	Endo	17	EGFR_TGFB1	0.501	0.329389	1
Prolif cells	Endo	23	a6b1 complex_LAMC1	0.233	0.153189	1
Prolif cells	Endo	24	aVb6 complex_TGFB1	0.517	0.339908	1
Prolif cells	Endo	56	RIPK1_TNFSF10	0.248	0.163051	1
Prolif cells	Endo	63	RIF1_NOTCH1	0.203	0.133465	1
Prolif cells	Ly	1	ANGPT1_TEK	0.33	0.216963	1
Prolif cells	Ly	12	CLEC2D_FAM3C	0.338	0.222222	1
Prolif cells	Ly	15	aVb1 complex_FN1	0.255	0.167653	1
Prolif cells	Ly	17	EGFR_TGFB1	0.396	0.260355	1
Prolif cells	Ly	18	HBEGF_CD44	0.649	0.426693	1
Prolif cells	Ly	20	GRN_TNFRSF1B	0.603	0.39645	1
Prolif cells	Ly	24	aVb6 complex_TGFB1	0.411	0.270217	1
Prolif cells	Ly	25	SPP1_CD44	1.521	1	1
Prolif cells	Ly	36	FGF1_FGFR3	0.258	0.169625	1
Prolif cells	Ly	40	aVb5 complex_FN1	0.177	0.116371	1
Prolif cells	Ly	56	RIPK1_TNFSF10	0.2	0.131492	1
Prolif cells	Ly	63	RIF1_NOTCH1	0.3	0.197239	1
Prolif cells	Mp-DC+Dendritic cells	14	GAS6_AXL	0.394	0.25904	1
Prolif cells	Mp-DC+Dendritic cells	17	EGFR_TGFB1	0.388	0.255095	1
Prolif cells	Mp-DC+Dendritic cells	18	HBEGF_CD44	0.425	0.279421	1
Prolif cells	Mp-DC+Dendritic cells	20	GRN_TNFRSF1B	0.38	0.249836	1
Prolif cells	Mp-DC+Dendritic cells	24	aVb6 complex_TGFB1	0.404	0.265615	1
Prolif cells	Mp-DC+Dendritic cells	25	SPP1_CD44	1.296	0.852071	1
Prolif cells	Mp-DC+Dendritic cells	57	PLAUR_a4b1 complex	0.213	0.140039	1
Prolif cells	Mp-DC+Dendritic cells	138	CCL2_CCR2	0.34	0.223537	1
Prolif cells	Ne	5	JAM3_aMb2 complex	0.212	0.139382	1
Prolif cells	Ne	18	HBEGF_CD44	0.574	0.377383	1
Prolif cells	Ne	20	GRN_TNFRSF1B	0.566	0.372124	1
Prolif cells	Ne	25	SPP1_CD44	1.446	0.95069	1
Prolif cells	Ne	63	RIF1_NOTCH1	0.17	0.111769	1
Prolif cells	Peri / St	4	aVb6 complex_TNC	0.18	0.118343	1
Prolif cells	Peri / St	7	IL15_IL15RA	0.162	0.106509	1
Prolif cells	Peri / St	12	CLEC2D_FAM3C	0.336	0.220907	1
Prolif cells	Peri / St	14	GAS6_AXL	0.417	0.274162	1
Prolif cells	Peri / St	19	IGF1R_IGF1	0.45	0.295858	1
Prolif cells	Peri / St	22	SEMA4D_PLXNB1	0.218	0.143327	1
Prolif cells	Peri / St	25	SPP1_CD44	1.055	0.693623	1
Prolif cells	Peri / St	46	BMP4_BMPR1A_BMPR2	0.224	0.147272	1
Prolif cells	Peri / St	56	RIPK1_TNFSF10	0.178	0.117028	1
Prolif cells	S1	30	NRG1_ERBB3	0.225	0.147929	1
Prolif cells	S1	32	NRG1_EGFR	0.247	0.162393	1
Prolif cells	S3	30	NRG1_ERBB3	0.238	0.156476	1
Prolif cells	S3	32	NRG1_EGFR	0.237	0.155819	1
Prolif cells	S3	56	RIPK1_TNFSF10	0.179	0.117686	1
Endo	Prolif cells	13	GAS6_MERTK	0.41	0.265372	1
Endo	Prolif cells	16	HBEGF_EGFR	0.675	0.436893	1
Endo	Prolif cells	44	NRP1_VEGFA	0.921	0.596117	1
Endo	Prolif cells	58	CD74_MIF	1.545	1	1
Endo	Prolif cells	78	KDR_VEGFA	0.784	0.507443	1
Endo	Prolif cells	80	FLT1 complex_VEGFA	0.784	0.507443	1
Endo	Prolif cells	83	FLT1_VEGFA	0.959	0.620712	1
Endo	Endo	23	a6b1 complex_LAMC1	0.416	0.269256	1
Endo	Endo	44	NRP1_VEGFA	0.721	0.466667	1
Endo	Endo	45	TGFbeta receptor1_TGFB1	0.551	0.356634	1
Endo	Endo	56	RIPK1_TNFSF10	0.242	0.156634	1
Endo	Endo	75	NRP2_SEMA3F	0.278	0.179935	1
Endo	Endo	78	KDR_VEGFA	0.583	0.377346	1
Endo	Endo	80	FLT1 complex_VEGFA	0.583	0.377346	1
Endo	Endo	83	FLT1_VEGFA	0.758	0.490615	1
Endo	Ly	15	aVb1 complex_FN1	0.438	0.283495	1
Endo	Ly	18	HBEGF_CD44	1.142	0.739159	1
Endo	Ly	20	GRN_TNFRSF1B	0.509	0.32945	1
Endo	Ly	25	SPP1_CD44	0.887	0.57411	1
Endo	Ly	45	TGFbeta receptor1_TGFB1	0.446	0.288673	1
Endo	Ly	56	RIPK1_TNFSF10	0.194	0.125566	1
Endo	Ly	65	KDR_VEGFC	0.644	0.416828	1
Endo	Ly	67	a5b1 complex_FN1	0.249	0.161165	1
Endo	Ly	68	CSF1_CSF1R	0.813	0.526214	1
Endo	Ly	75	NRP2_SEMA3F	0.383	0.247896	1
Endo	Ly	135	ANXA1_FPR1	0.497	0.321683	1
Endo	Ly	137	ANXA1_FPR3	0.642	0.415534	1
Endo	Mp-DC+Dendritic cells	14	GAS6_AXL	0.424	0.274434	1
Endo	Mp-DC+Dendritic cells	18	HBEGF_CD44	0.917	0.593528	1
Endo	Mp-DC+Dendritic cells	20	GRN_TNFRSF1B	0.285	0.184466	1
Endo	Mp-DC+Dendritic cells	25	SPP1_CD44	0.663	0.429126	1
Endo	Mp-DC+Dendritic cells	45	TGFbeta receptor1_TGFB1	0.438	0.283495	1
Endo	Mp-DC+Dendritic cells	57	PLAUR_a4b1 complex	1.091	0.706149	1
Endo	Mp-DC+Dendritic cells	68	CSF1_CSF1R	0.748	0.484142	1
Endo	Mp-DC+Dendritic cells	136	FAS_TNF	0.493	0.319094	1
Endo	Mp-DC+Dendritic cells	137	ANXA1_FPR3	0.208	0.134628	1
Endo	Mp-DC+Dendritic cells	138	CCL2_CCR2	0.76	0.491909	1
Endo	Ne	18	HBEGF_CD44	1.067	0.690615	1
Endo	Ne	20	GRN_TNFRSF1B	0.472	0.305502	1
Endo	Ne	25	SPP1_CD44	0.812	0.525566	1
Endo	Ne	44	NRP1_VEGFA	0.815	0.527508	1
Endo	Ne	78	KDR_VEGFA	0.678	0.438835	1
Endo	Ne	80	FLT1 complex_VEGFA	0.678	0.438835	1
Endo	Ne	83	FLT1_VEGFA	0.852	0.551456	1
Endo	Ne	135	ANXA1_FPR1	0.96	0.621359	1
Endo	Ne	136	FAS_TNF	0.435	0.281553	1
Endo	Ne	137	ANXA1_FPR3	0.702	0.454369	1
Endo	Ne	139	LIFR_OSM	0.377	0.244013	1
Endo	Peri / St	14	GAS6_AXL	0.447	0.28932	1
Endo	Peri / St	18	HBEGF_CD44	0.676	0.43754	1
Endo	Peri / St	44	NRP1_VEGFA	0.788	0.510032	1
Endo	Peri / St	45	TGFbeta receptor1_TGFB1	0.202	0.130744	1
Endo	Peri / St	56	RIPK1_TNFSF10	0.172	0.111327	1
Endo	Peri / St	68	CSF1_CSF1R	0.754	0.488026	1
Endo	Peri / St	78	KDR_VEGFA	0.65	0.420712	1
Endo	Peri / St	80	FLT1 complex_VEGFA	0.65	0.420712	1
Endo	Peri / St	81	NRP2_SEMA3C	0.308	0.199353	1
Endo	Peri / St	83	FLT1_VEGFA	0.825	0.533981	1
Endo	Peri / St	140	LIFR_LIF	0.192	0.124272	1
Endo	Peri / St	141	TGFbeta receptor1_TGFB2	0.253	0.163754	1
Endo	S1	16	HBEGF_EGFR	0.688	0.445307	1
Endo	S1	44	NRP1_VEGFA	0.898	0.58123	1
Endo	S1	58	CD74_MIF	1.441	0.932686	1
Endo	S1	78	KDR_VEGFA	0.761	0.492557	1
Endo	S1	79	NRP2_VEGFA	0.371	0.240129	1
Endo	S1	80	FLT1 complex_VEGFA	0.761	0.492557	1
Endo	S1	83	FLT1_VEGFA	0.936	0.605825	1
Endo	S3	16	HBEGF_EGFR	0.678	0.438835	1
Endo	S3	44	NRP1_VEGFA	0.909	0.58835	1
Endo	S3	56	RIPK1_TNFSF10	0.174	0.112621	1
Endo	S3	58	CD74_MIF	1.066	0.689968	1
Endo	S3	78	KDR_VEGFA	0.771	0.499029	1
Endo	S3	79	NRP2_VEGFA	0.381	0.246602	1
Endo	S3	80	FLT1 complex_VEGFA	0.771	0.499029	1
Endo	S3	81	NRP2_SEMA3C	0.248	0.160518	1
Endo	S3	83	FLT1_VEGFA	0.946	0.612298	1
Ly	Prolif cells	16	HBEGF_EGFR	0.555	0.255055	1
Ly	Prolif cells	44	NRP1_VEGFA	0.998	0.45864	1
Ly	Prolif cells	58	CD74_MIF	2.176	1	1
Ly	Prolif cells	74	JAM2_JAM3	0.24	0.110294	1
Ly	Prolif cells	78	KDR_VEGFA	1.158	0.532169	1
Ly	Prolif cells	79	NRP2_VEGFA	0.48	0.220588	1
Ly	Prolif cells	80	FLT1 complex_VEGFA	1.158	0.532169	1
Ly	Prolif cells	81	NRP2_SEMA3C	0.253	0.116268	1
Ly	Prolif cells	83	FLT1_VEGFA	1.118	0.513787	1
Ly	Endo	23	a6b1 complex_LAMC1	0.418	0.192096	1
Ly	Endo	44	NRP1_VEGFA	0.797	0.366268	1
Ly	Endo	45	TGFbeta receptor1_TGFB1	0.574	0.263787	1
Ly	Endo	56	RIPK1_TNFSF10	0.388	0.178309	1
Ly	Endo	58	CD74_MIF	1.425	0.654871	1
Ly	Endo	75	NRP2_SEMA3F	0.364	0.167279	1
Ly	Endo	78	KDR_VEGFA	0.957	0.439798	1
Ly	Endo	80	FLT1 complex_VEGFA	0.957	0.439798	1
Ly	Endo	83	FLT1_VEGFA	0.918	0.421875	1
Ly	Ly	15	aVb1 complex_FN1	0.44	0.202206	1
Ly	Ly	18	HBEGF_CD44	1.022	0.469669	1
Ly	Ly	45	TGFbeta receptor1_TGFB1	0.469	0.215533	1
Ly	Ly	56	RIPK1_TNFSF10	0.34	0.15625	1
Ly	Ly	58	CD74_MIF	1.553	0.713695	1
Ly	Ly	65	KDR_VEGFC	1.018	0.467831	1
Ly	Ly	67	a5b1 complex_FN1	0.231	0.106158	1
Ly	Ly	68	CSF1_CSF1R	0.909	0.417739	1
Ly	Ly	75	NRP2_SEMA3F	0.469	0.215533	1
Ly	Ly	147	IL1 receptor inhibitor_IL1RN	0.732	0.336397	1
Ly	Ly	148	IL1 receptor inhibitor_IL1B	1.216	0.558824	1
Ly	Mp-DC+Dendritic cells	18	HBEGF_CD44	0.797	0.366268	1
Ly	Mp-DC+Dendritic cells	45	TGFbeta receptor1_TGFB1	0.461	0.211857	1
Ly	Mp-DC+Dendritic cells	57	PLAUR_a4b1 complex	0.801	0.368107	1
Ly	Mp-DC+Dendritic cells	58	CD74_MIF	1.509	0.693474	1
Ly	Mp-DC+Dendritic cells	68	CSF1_CSF1R	0.844	0.387868	1
Ly	Mp-DC+Dendritic cells	70	PROS1_AXL	0.205	0.0942096	1
Ly	Mp-DC+Dendritic cells	136	FAS_TNF	0.491	0.225643	1
Ly	Mp-DC+Dendritic cells	138	CCL2_CCR2	0.558	0.256434	1
Ly	Mp-DC+Dendritic cells	147	IL1 receptor inhibitor_IL1RN	0.415	0.190717	1
Ly	Mp-DC+Dendritic cells	148	IL1 receptor inhibitor_IL1B	1.083	0.497702	1
Ly	Ne	18	HBEGF_CD44	0.947	0.435202	1
Ly	Ne	44	NRP1_VEGFA	0.892	0.409926	1
Ly	Ne	58	CD74_MIF	1.423	0.653952	1
Ly	Ne	78	KDR_VEGFA	1.051	0.482996	1
Ly	Ne	80	FLT1 complex_VEGFA	1.051	0.482996	1
Ly	Ne	81	NRP2_SEMA3C	0.261	0.119945	1
Ly	Ne	83	FLT1_VEGFA	1.012	0.465074	1
Ly	Ne	105	CCL18_CCR1	1.547	0.710938	1
Ly	Ne	136	FAS_TNF	0.433	0.198989	1
Ly	Ne	139	LIFR_OSM	0.426	0.195772	1
Ly	Ne	146	IL1 receptor inhibitor_IL1A	0.464	0.213235	1
Ly	Ne	147	IL1 receptor inhibitor_IL1RN	1.057	0.485754	1
Ly	Ne	148	IL1 receptor inhibitor_IL1B	1.981	0.910386	1
Ly	Peri / St	18	HBEGF_CD44	0.556	0.255515	1
Ly	Peri / St	22	SEMA4D_PLXNB1	0.215	0.0988051	1
Ly	Peri / St	44	NRP1_VEGFA	0.865	0.397518	1
Ly	Peri / St	45	TGFbeta receptor1_TGFB1	0.225	0.103401	1
Ly	Peri / St	56	RIPK1_TNFSF10	0.318	0.14614	1
Ly	Peri / St	58	CD74_MIF	1.594	0.732537	1
Ly	Peri / St	68	CSF1_CSF1R	0.85	0.390625	1
Ly	Peri / St	70	PROS1_AXL	0.229	0.105239	1
Ly	Peri / St	74	JAM2_JAM3	0.219	0.100643	1
Ly	Peri / St	78	KDR_VEGFA	1.024	0.470588	1
Ly	Peri / St	79	NRP2_VEGFA	0.346	0.159007	1
Ly	Peri / St	80	FLT1 complex_VEGFA	1.024	0.470588	1
Ly	Peri / St	81	NRP2_SEMA3C	0.394	0.181066	1
Ly	Peri / St	83	FLT1_VEGFA	0.985	0.452665	1
Ly	Peri / St	140	LIFR_LIF	0.241	0.110754	1
Ly	Peri / St	141	TGFbeta receptor1_TGFB2	0.276	0.126838	1
Ly	S1	16	HBEGF_EGFR	0.568	0.261029	1
Ly	S1	44	NRP1_VEGFA	0.975	0.44807	1
Ly	S1	58	CD74_MIF	2.072	0.952206	1
Ly	S1	78	KDR_VEGFA	1.135	0.521599	1
Ly	S1	79	NRP2_VEGFA	0.457	0.210018	1
Ly	S1	80	FLT1 complex_VEGFA	1.135	0.521599	1
Ly	S1	83	FLT1_VEGFA	1.095	0.503217	1
Ly	S3	16	HBEGF_EGFR	0.558	0.256434	1
Ly	S3	44	NRP1_VEGFA	0.986	0.453125	1
Ly	S3	56	RIPK1_TNFSF10	0.32	0.147059	1
Ly	S3	58	CD74_MIF	1.697	0.779871	1
Ly	S3	78	KDR_VEGFA	1.145	0.526195	1
Ly	S3	79	NRP2_VEGFA	0.467	0.214614	1
Ly	S3	80	FLT1 complex_VEGFA	1.145	0.526195	1
Ly	S3	81	NRP2_SEMA3C	0.334	0.153493	1
Ly	S3	83	FLT1_VEGFA	1.106	0.508272	1
Mp-DC+Dendritic cells	Prolif cells	58	CD74_MIF	3.609	1	1
Mp-DC+Dendritic cells	Prolif cells	59	a4b1 complex_SPP1	1.115	0.30895	1
Mp-DC+Dendritic cells	Prolif cells	129	PVR_PRR3	0.173	0.0479357	1
Mp-DC+Dendritic cells	Prolif cells	132	TNF_LTBR	0.28	0.0775838	1
Mp-DC+Dendritic cells	Prolif cells	134	TNF_RIPK1	0.296	0.0820172	1
Mp-DC+Dendritic cells	Endo	23	a6b1 complex_LAMC1	0.235	0.065115	1
Mp-DC+Dendritic cells	Endo	58	CD74_MIF	2.858	0.791909	1
Mp-DC+Dendritic cells	Endo	134	TNF_RIPK1	0.291	0.0806318	1
Mp-DC+Dendritic cells	Ly	15	aVb1 complex_FN1	0.257	0.0712109	1
Mp-DC+Dendritic cells	Ly	20	GRN_TNFRSF1B	0.586	0.162372	1
Mp-DC+Dendritic cells	Ly	25	SPP1_CD44	0.787	0.218066	1
Mp-DC+Dendritic cells	Ly	53	a4b7 complex_FN1	0.269	0.0745359	1
Mp-DC+Dendritic cells	Ly	54	a4b1 complex_FN1	0.269	0.0745359	1
Mp-DC+Dendritic cells	Ly	58	CD74_MIF	2.986	0.827376	1
Mp-DC+Dendritic cells	Ly	67	a5b1 complex_FN1	0.225	0.0623441	1
Mp-DC+Dendritic cells	Ly	133	TNF_TNFRSF1B	0.608	0.168468	1
Mp-DC+Dendritic cells	Ly	134	TNF_RIPK1	0.437	0.121086	1
Mp-DC+Dendritic cells	Ly	135	ANXA1_FPR1	0.515	0.142699	1
Mp-DC+Dendritic cells	Ly	137	ANXA1_FPR3	0.661	0.183153	1
Mp-DC+Dendritic cells	Mp-DC+Dendritic cells	20	GRN_TNFRSF1B	0.362	0.100305	1
Mp-DC+Dendritic cells	Mp-DC+Dendritic cells	57	PLAUR_a4b1 complex	0.548	0.151843	1
Mp-DC+Dendritic cells	Mp-DC+Dendritic cells	58	CD74_MIF	2.942	0.815184	1
Mp-DC+Dendritic cells	Mp-DC+Dendritic cells	130	CCL8_CCR2	0.688	0.190635	1
Mp-DC+Dendritic cells	Mp-DC+Dendritic cells	133	TNF_TNFRSF1B	0.384	0.106401	1
Mp-DC+Dendritic cells	Mp-DC+Dendritic cells	136	FAS_TNF	0.343	0.0950402	1
Mp-DC+Dendritic cells	Mp-DC+Dendritic cells	137	ANXA1_FPR3	0.227	0.0628983	1
Mp-DC+Dendritic cells	Mp-DC+Dendritic cells	138	CCL2_CCR2	0.614	0.17013	1
Mp-DC+Dendritic cells	Ne	20	GRN_TNFRSF1B	0.549	0.15212	1
Mp-DC+Dendritic cells	Ne	25	SPP1_CD44	0.712	0.197285	1
Mp-DC+Dendritic cells	Ne	50	CCL15_CCR1	0.743	0.205874	1
Mp-DC+Dendritic cells	Ne	58	CD74_MIF	2.856	0.791355	1
Mp-DC+Dendritic cells	Ne	105	CCL18_CCR1	1.435	0.397617	1
Mp-DC+Dendritic cells	Ne	128	CCL8_CCR1	0.801	0.221945	1
Mp-DC+Dendritic cells	Ne	131	CCL5_CCR1	1.235	0.3422	1
Mp-DC+Dendritic cells	Ne	133	TNF_TNFRSF1B	0.571	0.158216	1
Mp-DC+Dendritic cells	Ne	135	ANXA1_FPR1	0.979	0.271266	1
Mp-DC+Dendritic cells	Ne	136	FAS_TNF	0.286	0.0792463	1
Mp-DC+Dendritic cells	Ne	137	ANXA1_FPR3	0.721	0.199778	1
Mp-DC+Dendritic cells	Peri / St	7	IL15_IL15RA	0.149	0.0412857	1
Mp-DC+Dendritic cells	Peri / St	52	a4b1 complex_TNC	0.226	0.0626212	1
Mp-DC+Dendritic cells	Peri / St	58	CD74_MIF	3.027	0.838736	1
Mp-DC+Dendritic cells	Peri / St	59	a4b1 complex_SPP1	1.44	0.399002	1
Mp-DC+Dendritic cells	S1	58	CD74_MIF	3.505	0.971183	1
Mp-DC+Dendritic cells	S1	59	a4b1 complex_SPP1	1.037	0.287337	1
Mp-DC+Dendritic cells	S3	44	NRP1_VEGFA	0.385	0.106678	1
Mp-DC+Dendritic cells	S3	58	CD74_MIF	3.13	0.867276	1
Ne	Prolif cells	58	CD74_MIF	1.746	0.827488	1
Ne	Prolif cells	132	TNF_LTBR	0.223	0.105687	1
Ne	Prolif cells	134	TNF_RIPK1	0.239	0.11327	1
Ne	Endo	24	aVb6 complex_TGFB1	0.589	0.279147	1
Ne	Endo	134	TNF_RIPK1	0.233	0.110427	1
Ne	Ly	15	aVb1 complex_FN1	0.23	0.109005	1
Ne	Ly	24	aVb6 complex_TGFB1	0.483	0.22891	1
Ne	Ly	25	SPP1_CD44	0.713	0.337915	1
Ne	Ly	36	FGF1_FGFR3	0.26	0.123223	1
Ne	Ly	48	aMb2 complex_F10	0.24	0.113744	1
Ne	Ly	133	TNF_TNFRSF1B	0.55	0.260664	1
Ne	Ly	134	TNF_RIPK1	0.379	0.179621	1
Ne	Ly	135	ANXA1_FPR1	0.703	0.333175	1
Ne	Ly	137	ANXA1_FPR3	0.849	0.40237	1
Ne	Ly	147	IL1 receptor inhibitor_IL1RN	0.86	0.407583	1
Ne	Ly	148	IL1 receptor inhibitor_IL1B	1.344	0.636967	1
Ne	Mp-DC+Dendritic cells	24	aVb6 complex_TGFB1	0.475	0.225118	1
Ne	Mp-DC+Dendritic cells	57	PLAUR_a4b1 complex	0.766	0.363033	1
Ne	Mp-DC+Dendritic cells	58	CD74_MIF	1.079	0.511374	1
Ne	Mp-DC+Dendritic cells	133	TNF_TNFRSF1B	0.326	0.154502	1
Ne	Mp-DC+Dendritic cells	136	FAS_TNF	0.654	0.309953	1
Ne	Mp-DC+Dendritic cells	137	ANXA1_FPR3	0.415	0.196682	1
Ne	Mp-DC+Dendritic cells	147	IL1 receptor inhibitor_IL1RN	0.543	0.257346	1
Ne	Mp-DC+Dendritic cells	148	IL1 receptor inhibitor_IL1B	1.211	0.573934	1
Ne	Ne	105	CCL18_CCR1	1.665	0.7891	1
Ne	Ne	131	CCL5_CCR1	0.477	0.226066	1
Ne	Ne	133	TNF_TNFRSF1B	0.513	0.243128	1
Ne	Ne	135	ANXA1_FPR1	1.167	0.553081	1
Ne	Ne	136	FAS_TNF	0.597	0.282938	1
Ne	Ne	137	ANXA1_FPR3	0.909	0.430806	1
Ne	Ne	146	IL1 receptor inhibitor_IL1A	0.593	0.281043	1
Ne	Ne	147	IL1 receptor inhibitor_IL1RN	1.185	0.561611	1
Ne	Ne	148	IL1 receptor inhibitor_IL1B	2.11	1	1
Ne	Peri / St	4	aVb6 complex_TNC	0.252	0.119431	1
Ne	Peri / St	7	IL15_IL15RA	0.165	0.0781991	1
Ne	Peri / St	22	SEMA4D_PLXNB1	0.262	0.124171	1
Ne	Peri / St	51	aMb2 complex_C3	0.546	0.258768	1
Ne	Peri / St	58	CD74_MIF	1.164	0.551659	1
Ne	S1	58	CD74_MIF	1.642	0.778199	1
Ne	S3	58	CD74_MIF	1.268	0.600948	1
Peri / St	Prolif cells	16	HBEGF_EGFR	0.475	0.257313	1
Peri / St	Prolif cells	44	NRP1_VEGFA	0.581	0.314735	1
Peri / St	Prolif cells	58	CD74_MIF	1.411	0.764355	1
Peri / St	Prolif cells	102	BMP2_BMPR1A_BMPR2	0.148	0.0801733	1
Peri / St	Prolif cells	127	a1b1 complex_COL4A1	0.286	0.15493	1
Peri / St	Prolif cells	129	PVR_PRR3	0.179	0.0969664	1
Peri / St	Endo	23	a6b1 complex_LAMC1	0.402	0.217768	1
Peri / St	Endo	24	aVb6 complex_TGFB1	0.625	0.33857	1
Peri / St	Endo	44	NRP1_VEGFA	0.38	0.20585	1
Peri / St	Endo	45	TGFbeta receptor1_TGFB1	0.566	0.306609	1
Peri / St	Endo	63	RIF1_NOTCH1	0.179	0.0969664	1
Peri / St	Endo	75	NRP2_SEMA3F	0.254	0.137595	1
Peri / St	Endo	87	ANGPT2_TEK	0.471	0.255146	1
Peri / St	Endo	104	TGFBR3_TGFB1	0.514	0.27844	1
Peri / St	Endo	124	a1b1 complex_COL4A2	0.236	0.127844	1
Peri / St	Endo	127	a1b1 complex_COL4A1	0.474	0.256771	1
Peri / St	Ly	15	aVb1 complex_FN1	0.424	0.229686	1
Peri / St	Ly	18	HBEGF_CD44	0.941	0.509751	1
Peri / St	Ly	20	GRN_TNFRSF1B	0.514	0.27844	1
Peri / St	Ly	24	aVb6 complex_TGFB1	0.519	0.281148	1
Peri / St	Ly	25	SPP1_CD44	1.846	1	1
Peri / St	Ly	40	aVb5 complex_FN1	0.201	0.108884	1
Peri / St	Ly	45	TGFbeta receptor1_TGFB1	0.461	0.249729	1
Peri / St	Ly	63	RIF1_NOTCH1	0.276	0.149512	1
Peri / St	Ly	67	a5b1 complex_FN1	0.226	0.122427	1
Peri / St	Ly	68	CSF1_CSF1R	0.575	0.311484	1
Peri / St	Ly	71	a3b1 complex_FN1	0.205	0.111051	1
Peri / St	Ly	75	NRP2_SEMA3F	0.359	0.194475	1
Peri / St	Ly	87	ANGPT2_TEK	0.36	0.195016	1
Peri / St	Ly	89	IL34_CSF1R	0.291	0.157638	1
Peri / St	Ly	104	TGFBR3_TGFB1	0.409	0.22156	1
Peri / St	Ly	127	a1b1 complex_COL4A1	0.49	0.265439	1
Peri / St	Mp-DC+Dendritic cells	14	GAS6_AXL	0.327	0.17714	1
Peri / St	Mp-DC+Dendritic cells	18	HBEGF_CD44	0.717	0.388407	1
Peri / St	Mp-DC+Dendritic cells	20	GRN_TNFRSF1B	0.29	0.157096	1
Peri / St	Mp-DC+Dendritic cells	24	aVb6 complex_TGFB1	0.511	0.276815	1
Peri / St	Mp-DC+Dendritic cells	25	SPP1_CD44	1.621	0.878115	1
Peri / St	Mp-DC+Dendritic cells	45	TGFbeta receptor1_TGFB1	0.453	0.245395	1
Peri / St	Mp-DC+Dendritic cells	57	PLAUR_a4b1 complex	0.358	0.193933	1
Peri / St	Mp-DC+Dendritic cells	68	CSF1_CSF1R	0.51	0.276273	1
Peri / St	Mp-DC+Dendritic cells	89	IL34_CSF1R	0.227	0.122969	1
Peri / St	Mp-DC+Dendritic cells	104	TGFBR3_TGFB1	0.401	0.217226	1
Peri / St	Mp-DC+Dendritic cells	136	FAS_TNF	0.344	0.186349	1
Peri / St	Mp-DC+Dendritic cells	138	CCL2_CCR2	0.909	0.492416	1
Peri / St	Mp-DC+Dendritic cells	143	C3_C3AR1	0.544	0.294691	1
Peri / St	Mp-DC+Dendritic cells	144	CCL7_CCR2	0.494	0.267606	1
Peri / St	Ne	5	JAM3_aMb2 complex	0.191	0.103467	1
Peri / St	Ne	18	HBEGF_CD44	0.866	0.469122	1
Peri / St	Ne	20	GRN_TNFRSF1B	0.477	0.258397	1
Peri / St	Ne	25	SPP1_CD44	1.771	0.959372	1
Peri / St	Ne	44	NRP1_VEGFA	0.474	0.256771	1
Peri / St	Ne	63	RIF1_NOTCH1	0.146	0.0790899	1
Peri / St	Ne	81	NRP2_SEMA3C	0.151	0.0817985	1
Peri / St	Ne	131	CCL5_CCR1	0.507	0.274648	1
Peri / St	Ne	136	FAS_TNF	0.286	0.15493	1
Peri / St	Ne	142	CCL7_CCR1	0.606	0.328277	1
Peri / St	Peri / St	4	aVb6 complex_TNC	0.288	0.156013	1
Peri / St	Peri / St	14	GAS6_AXL	0.351	0.190141	1
Peri / St	Peri / St	18	HBEGF_CD44	0.476	0.257855	1
Peri / St	Peri / St	19	IGF1R_IGF1	0.488	0.264355	1
Peri / St	Peri / St	24	aVb6 complex_TGFB1	0.276	0.149512	1
Peri / St	Peri / St	25	SPP1_CD44	1.38	0.747562	1
Peri / St	Peri / St	44	NRP1_VEGFA	0.447	0.242145	1
Peri / St	Peri / St	45	TGFbeta receptor1_TGFB1	0.217	0.117551	1
Peri / St	Peri / St	68	CSF1_CSF1R	0.516	0.279523	1
Peri / St	Peri / St	81	NRP2_SEMA3C	0.284	0.153846	1
Peri / St	Peri / St	89	IL34_CSF1R	0.232	0.125677	1
Peri / St	Peri / St	102	BMP2_BMPR1A_BMPR2	0.242	0.131094	1
Peri / St	Peri / St	104	TGFBR3_TGFB1	0.165	0.0893824	1
Peri / St	Peri / St	120	a1b1 complex_COL4A5	0.245	0.132719	1
Peri / St	Peri / St	124	a1b1 complex_COL4A2	0.34	0.184182	1
Peri / St	Peri / St	126	a1b1 complex_COL18A1	0.614	0.332611	1
Peri / St	Peri / St	127	a1b1 complex_COL4A1	0.668	0.361863	1
Peri / St	Peri / St	141	TGFbeta receptor1_TGFB2	0.268	0.145179	1
Peri / St	Peri / St	145	TGFB2_TGFBR3	0.216	0.11701	1
Peri / St	S1	16	HBEGF_EGFR	0.488	0.264355	1
Peri / St	S1	30	NRG1_ERBB3	0.148	0.0801733	1
Peri / St	S1	32	NRG1_EGFR	0.17	0.092091	1
Peri / St	S1	44	NRP1_VEGFA	0.558	0.302275	1
Peri / St	S1	58	CD74_MIF	1.306	0.707476	1
Peri / St	S1	79	NRP2_VEGFA	0.347	0.187974	1
Peri / St	S1	115	a1b1 complex_COL8A1	0.192	0.104009	1
Peri / St	S1	121	a1b1 complex_COL27A1	0.342	0.185265	1
Peri / St	S1	122	a1b1 complex_COL4A3	0.378	0.204767	1
Peri / St	S1	123	a1b1 complex_COL4A4	0.436	0.236186	1
Peri / St	S1	127	a1b1 complex_COL4A1	0.207	0.112134	1
Peri / St	S3	16	HBEGF_EGFR	0.477	0.258397	1
Peri / St	S3	30	NRG1_ERBB3	0.161	0.0872156	1
Peri / St	S3	32	NRG1_EGFR	0.16	0.0866739	1
Peri / St	S3	44	NRP1_VEGFA	0.568	0.307692	1
Peri / St	S3	79	NRP2_VEGFA	0.358	0.193933	1
Peri / St	S3	81	NRP2_SEMA3C	0.224	0.121343	1
Peri / St	S3	121	a1b1 complex_COL27A1	0.224	0.121343	1
Peri / St	S3	122	a1b1 complex_COL4A3	0.473	0.25623	1
Peri / St	S3	123	a1b1 complex_COL4A4	0.468	0.253521	1
Peri / St	S3	127	a1b1 complex_COL4A1	0.181	0.0980498	1
S1	Prolif cells	13	GAS6_MERTK	0.364	0.252427	1
S1	Prolif cells	58	CD74_MIF	1.252	0.868239	1
S1	Endo	12	CLEC2D_FAM3C	0.317	0.219834	1
S1	Endo	17	EGFR_TGFB1	0.514	0.356449	1
S1	Endo	23	a6b1 complex_LAMC1	0.177	0.122746	1
S1	Endo	24	aVb6 complex_TGFB1	0.573	0.397365	1
S1	Ly	12	CLEC2D_FAM3C	0.323	0.223994	1
S1	Ly	15	aVb1 complex_FN1	0.199	0.138003	1
S1	Ly	17	EGFR_TGFB1	0.409	0.283634	1
S1	Ly	20	GRN_TNFRSF1B	0.485	0.336338	1
S1	Ly	24	aVb6 complex_TGFB1	0.467	0.323856	1
S1	Ly	25	SPP1_CD44	1.442	1	1
S1	Ly	36	FGF1_FGFR3	0.199	0.138003	1
S1	Mp-DC+Dendritic cells	14	GAS6_AXL	0.378	0.262136	1
S1	Mp-DC+Dendritic cells	17	EGFR_TGFB1	0.401	0.278086	1
S1	Mp-DC+Dendritic cells	20	GRN_TNFRSF1B	0.261	0.180999	1
S1	Mp-DC+Dendritic cells	24	aVb6 complex_TGFB1	0.459	0.318308	1
S1	Mp-DC+Dendritic cells	25	SPP1_CD44	1.218	0.84466	1
S1	Ne	20	GRN_TNFRSF1B	0.448	0.31068	1
S1	Ne	25	SPP1_CD44	1.368	0.948682	1
S1	Peri / St	4	aVb6 complex_TNC	0.236	0.163662	1
S1	Peri / St	10	TTR_DDR1	0.462	0.320388	1
S1	Peri / St	12	CLEC2D_FAM3C	0.321	0.222607	1
S1	Peri / St	14	GAS6_AXL	0.401	0.278086	1
S1	Peri / St	17	EGFR_TGFB1	0.165	0.114424	1
S1	Peri / St	19	IGF1R_IGF1	0.405	0.28086	1
S1	Peri / St	25	SPP1_CD44	0.977	0.677531	1
S1	S1	58	CD74_MIF	1.148	0.796117	1
S3	Prolif cells	58	CD74_MIF	1.242	1	1
S3	Endo	17	EGFR_TGFB1	0.504	0.405797	1
S3	Endo	23	a6b1 complex_LAMC1	0.225	0.181159	1
S3	Endo	24	aVb6 complex_TGFB1	0.606	0.487923	1
S3	Ly	15	aVb1 complex_FN1	0.247	0.198873	1
S3	Ly	17	EGFR_TGFB1	0.398	0.320451	1
S3	Ly	18	HBEGF_CD44	0.642	0.516908	1
S3	Ly	20	GRN_TNFRSF1B	0.498	0.400966	1
S3	Ly	24	aVb6 complex_TGFB1	0.501	0.403382	1
S3	Ly	25	SPP1_CD44	0.716	0.57649	1
S3	Ly	36	FGF1_FGFR3	0.313	0.252013	1
S3	Mp-DC+Dendritic cells	14	GAS6_AXL	0.273	0.219807	1
S3	Mp-DC+Dendritic cells	17	EGFR_TGFB1	0.39	0.31401	1
S3	Mp-DC+Dendritic cells	18	HBEGF_CD44	0.417	0.335749	1
S3	Mp-DC+Dendritic cells	20	GRN_TNFRSF1B	0.274	0.220612	1
S3	Mp-DC+Dendritic cells	24	aVb6 complex_TGFB1	0.493	0.39694	1
S3	Ne	18	HBEGF_CD44	0.567	0.456522	1
S3	Ne	20	GRN_TNFRSF1B	0.461	0.371176	1
S3	Ne	25	SPP1_CD44	0.641	0.516103	1
S3	Peri / St	4	aVb6 complex_TNC	0.27	0.217391	1
S3	Peri / St	7	IL15_IL15RA	0.135	0.108696	1
S3	Peri / St	10	TTR_DDR1	0.49	0.394525	1
S3	Peri / St	14	GAS6_AXL	0.297	0.23913	1
S3	Peri / St	17	EGFR_TGFB1	0.154	0.123994	1
S3	Peri / St	18	HBEGF_CD44	0.176	0.141707	1
S3	Peri / St	19	IGF1R_IGF1	0.451	0.363124	1
S3	Peri / St	22	SEMA4D_PLXNB1	0.163	0.13124	1
S3	Peri / St	24	aVb6 complex_TGFB1	0.257	0.206924	1
S3	S1	58	CD74_MIF	1.138	0.916264	1
Prolif cells	Endo	23	a6b1 complex_LAMC1	0.414	0.221865	4
Prolif cells	Endo	24	aVb6 complex_TGFB1	0.294	0.157556	4
Prolif cells	Ly	7	IL15_IL15RA	0.411	0.220257	4
Prolif cells	Ly	20	GRN_TNFRSF1B	0.437	0.234191	4
Prolif cells	Ly	23	a6b1 complex_LAMC1	0.407	0.218114	4
Prolif cells	Ly	24	aVb6 complex_TGFB1	0.413	0.221329	4
Prolif cells	Ly	63	RIF1_NOTCH1	0.133	0.0712755	4
Prolif cells	Ly	105	CCL18_CCR1	0.211	0.113076	4
Prolif cells	Ly	136	FAS_TNF	0.254	0.13612	4
Prolif cells	Mp-DC+Dendritic cells	15	aVb1 complex_FN1	0.364	0.19507	4
Prolif cells	Mp-DC+Dendritic cells	20	GRN_TNFRSF1B	0.433	0.232047	4
Prolif cells	Mp-DC+Dendritic cells	105	CCL18_CCR1	0.267	0.143087	4
Prolif cells	Ne	20	GRN_TNFRSF1B	0.336	0.180064	4
Prolif cells	Ne	105	CCL18_CCR1	0.646	0.346195	4
Prolif cells	Ne	131	CCL5_CCR1	0.896	0.480171	4
Prolif cells	Peri / St	14	GAS6_AXL	0.544	0.291533	4
Prolif cells	Peri / St	21	BMP7_BMPR1A_BMPR2	0.19	0.101822	4
Prolif cells	Peri / St	32	NRG1_EGFR	0.192	0.102894	4
Prolif cells	S1	32	NRG1_EGFR	0.192	0.102894	4
Prolif cells	S1	58	CD74_MIF	1.194	0.639871	4
Prolif cells	S3	30	NRG1_ERBB3	0.206	0.110397	4
Endo	Prolif cells	58	CD74_MIF	1.439	0.598088	4
Endo	Prolif cells	78	KDR_VEGFA	0.295	0.12261	4
Endo	Prolif cells	80	FLT1 complex_VEGFA	0.295	0.12261	4
Endo	Prolif cells	83	FLT1_VEGFA	0.702	0.291771	4
Endo	Prolif cells	149	CXCL10_DPP4	2.363	0.982128	4
Endo	Prolif cells	156	CXCL9_DPP4	0.84	0.349127	4
Endo	Endo	7	IL15_IL15RA	0.554	0.230258	4
Endo	Endo	23	a6b1 complex_LAMC1	0.377	0.156692	4
Endo	Endo	26	GRN_TNFRSF1A	0.416	0.172901	4
Endo	Endo	45	TGFbeta receptor1_TGFB1	0.231	0.09601	4
Endo	Endo	151	TNFSF10_TNFRSF11B	0.837	0.34788	4
Endo	Ly	7	IL15_IL15RA	0.638	0.26517	4
Endo	Ly	18	HBEGF_CD44	0.653	0.271405	4
Endo	Ly	20	GRN_TNFRSF1B	0.519	0.215711	4
Endo	Ly	23	a6b1 complex_LAMC1	0.371	0.154198	4
Endo	Ly	45	TGFbeta receptor1_TGFB1	0.351	0.145885	4
Endo	Ly	74	JAM2_JAM3	0.206	0.0856193	4
Endo	Ly	131	CCL5_CCR1	0.661	0.27473	4
Endo	Ly	135	ANXA1_FPR1	0.623	0.258936	4
Endo	Ly	136	FAS_TNF	0.616	0.256027	4
Endo	Ly	137	ANXA1_FPR3	0.925	0.384456	4
Endo	Ly	138	CCL2_CCR2	1.251	0.51995	4
Endo	Ly	151	TNFSF10_TNFRSF11B	0.761	0.316293	4
Endo	Ly	152	CCL5_CCR5	0.63	0.261845	4
Endo	Ly	162	CSF3_CSF3R	0.414	0.17207	4
Endo	Mp-DC+Dendritic cells	7	IL15_IL15RA	0.538	0.223608	4
Endo	Mp-DC+Dendritic cells	15	aVb1 complex_FN1	0.328	0.136326	4
Endo	Mp-DC+Dendritic cells	18	HBEGF_CD44	0.8	0.332502	4
Endo	Mp-DC+Dendritic cells	20	GRN_TNFRSF1B	0.514	0.213633	4
Endo	Mp-DC+Dendritic cells	26	GRN_TNFRSF1A	0.323	0.134248	4
Endo	Mp-DC+Dendritic cells	45	TGFbeta receptor1_TGFB1	0.214	0.0889443	4
Endo	Mp-DC+Dendritic cells	57	PLAUR_a4b1 complex	0.816	0.339152	4
Endo	Mp-DC+Dendritic cells	68	CSF1_CSF1R	0.529	0.219867	4
Endo	Mp-DC+Dendritic cells	131	CCL5_CCR1	0.717	0.298005	4
Endo	Mp-DC+Dendritic cells	135	ANXA1_FPR1	0.531	0.220698	4
Endo	Mp-DC+Dendritic cells	137	ANXA1_FPR3	0.746	0.310058	4
Endo	Mp-DC+Dendritic cells	138	CCL2_CCR2	1.39	0.577722	4
Endo	Mp-DC+Dendritic cells	152	CCL5_CCR5	0.675	0.280549	4
Endo	Mp-DC+Dendritic cells	160	CSF3_CSF1R	0.259	0.107648	4
Endo	Mp-DC+Dendritic cells	162	CSF3_CSF3R	0.289	0.120116	4
Endo	Ne	18	HBEGF_CD44	0.557	0.231505	4
Endo	Ne	20	GRN_TNFRSF1B	0.417	0.173317	4
Endo	Ne	26	GRN_TNFRSF1A	0.396	0.164589	4
Endo	Ne	131	CCL5_CCR1	1.096	0.455528	4
Endo	Ne	135	ANXA1_FPR1	1.159	0.481712	4
Endo	Ne	136	FAS_TNF	0.615	0.255611	4
Endo	Ne	137	ANXA1_FPR3	0.903	0.375312	4
Endo	Ne	161	OSMR_OSM	1.112	0.462178	4
Endo	Ne	162	CSF3_CSF3R	0.54	0.224439	4
Endo	Peri / St	7	IL15_IL15RA	0.508	0.211139	4
Endo	Peri / St	14	GAS6_AXL	0.501	0.208229	4
Endo	Peri / St	16	HBEGF_EGFR	0.418	0.173732	4
Endo	Peri / St	18	HBEGF_CD44	0.648	0.269327	4
Endo	Peri / St	26	GRN_TNFRSF1A	0.408	0.169576	4
Endo	Peri / St	58	CD74_MIF	1.118	0.464672	4
Endo	Peri / St	70	PROS1_AXL	0.482	0.200333	4
Endo	S1	16	HBEGF_EGFR	0.418	0.173732	4
Endo	S1	58	CD74_MIF	1.519	0.631338	4
Endo	S1	78	KDR_VEGFA	0.319	0.132585	4
Endo	S1	80	FLT1 complex_VEGFA	0.319	0.132585	4
Endo	S1	83	FLT1_VEGFA	0.726	0.301746	4
Endo	S3	16	HBEGF_EGFR	0.384	0.159601	4
Endo	S3	44	NRP1_VEGFA	0.3	0.124688	4
Endo	S3	58	CD74_MIF	1.166	0.484622	4
Endo	S3	78	KDR_VEGFA	0.337	0.140067	4
Endo	S3	80	FLT1 complex_VEGFA	0.337	0.140067	4
Endo	S3	83	FLT1_VEGFA	0.744	0.309227	4
Ly	Prolif cells	58	CD74_MIF	1.8	0.810081	4
Ly	Prolif cells	78	KDR_VEGFA	0.487	0.219172	4
Ly	Prolif cells	79	NRP2_VEGFA	0.251	0.112961	4
Ly	Prolif cells	80	FLT1 complex_VEGFA	0.487	0.219172	4
Ly	Prolif cells	81	NRP2_SEMA3C	0.199	0.089559	4
Ly	Prolif cells	83	FLT1_VEGFA	0.822	0.369937	4
Ly	Prolif cells	132	TNF_LTBR	0.17	0.0765077	4
Ly	Prolif cells	149	CXCL10_DPP4	2.179	0.980648	4
Ly	Prolif cells	156	CXCL9_DPP4	0.861	0.387489	4
Ly	Endo	7	IL15_IL15RA	0.519	0.233573	4
Ly	Endo	23	a6b1 complex_LAMC1	0.496	0.223222	4
Ly	Endo	26	GRN_TNFRSF1A	0.48	0.216022	4
Ly	Endo	45	TGFbeta receptor1_TGFB1	0.231	0.10396	4
Ly	Endo	56	RIPK1_TNFSF10	0.781	0.351485	4
Ly	Endo	58	CD74_MIF	1.235	0.555806	4
Ly	Endo	75	NRP2_SEMA3F	0.288	0.129613	4
Ly	Endo	151	TNFSF10_TNFRSF11B	0.974	0.438344	4
Ly	Endo	158	ADORA2A_NAMPT	0.727	0.327183	4
Ly	Endo	163	TNF_TNFRSF1A	0.315	0.141764	4
Ly	Endo	164	IL6 receptor_IL6	0.425	0.191269	4
Ly	Ly	5	JAM3_aMb2 complex	0.185	0.0832583	4
Ly	Ly	7	IL15_IL15RA	0.602	0.270927	4
Ly	Ly	18	HBEGF_CD44	0.582	0.261926	4
Ly	Ly	20	GRN_TNFRSF1B	0.583	0.262376	4
Ly	Ly	23	a6b1 complex_LAMC1	0.49	0.220522	4
Ly	Ly	45	TGFbeta receptor1_TGFB1	0.351	0.157966	4
Ly	Ly	48	aMb2 complex_F10	0.274	0.123312	4
Ly	Ly	50	CCL15_CCR1	0.36	0.162016	4
Ly	Ly	51	aMb2 complex_C3	0.351	0.157966	4
Ly	Ly	56	RIPK1_TNFSF10	0.918	0.413141	4
Ly	Ly	58	CD74_MIF	1.339	0.60261	4
Ly	Ly	74	JAM2_JAM3	0.168	0.0756076	4
Ly	Ly	75	NRP2_SEMA3F	0.299	0.134563	4
Ly	Ly	87	ANGPT2_TEK	0.185	0.0832583	4
Ly	Ly	105	CCL18_CCR1	1.143	0.514401	4
Ly	Ly	131	CCL5_CCR1	1.575	0.708821	4
Ly	Ly	132	TNF_LTBR	0.156	0.070207	4
Ly	Ly	133	TNF_TNFRSF1B	0.418	0.188119	4
Ly	Ly	134	TNF_RIPK1	0.227	0.10216	4
Ly	Ly	135	ANXA1_FPR1	0.673	0.30288	4
Ly	Ly	136	FAS_TNF	0.592	0.266427	4
Ly	Ly	137	ANXA1_FPR3	0.975	0.438794	4
Ly	Ly	138	CCL2_CCR2	1.437	0.646715	4
Ly	Ly	142	CCL7_CCR1	0.41	0.184518	4
Ly	Ly	144	CCL7_CCR2	0.395	0.177768	4
Ly	Ly	147	IL1 receptor inhibitor_IL1RN	1.018	0.458146	4
Ly	Ly	148	IL1 receptor inhibitor_IL1B	1.215	0.546805	4
Ly	Ly	151	TNFSF10_TNFRSF11B	0.897	0.40369	4
Ly	Ly	152	CCL5_CCR5	1.544	0.694869	4
Ly	Ly	157	CCL7_CCR5	0.379	0.170567	4
Ly	Ly	158	ADORA2A_NAMPT	0.85	0.382538	4
Ly	Ly	159	CCR5_CCL4	1.797	0.808731	4
Ly	Ly	162	CSF3_CSF3R	0.432	0.194419	4
Ly	Ly	163	TNF_TNFRSF1A	0.241	0.108461	4
Ly	Ly	164	IL6 receptor_IL6	0.483	0.217372	4
Ly	Mp-DC+Dendritic cells	5	JAM3_aMb2 complex	0.195	0.0877588	4
Ly	Mp-DC+Dendritic cells	7	IL15_IL15RA	0.503	0.226373	4
Ly	Mp-DC+Dendritic cells	15	aVb1 complex_FN1	0.447	0.20117	4
Ly	Mp-DC+Dendritic cells	18	HBEGF_CD44	0.73	0.328533	4
Ly	Mp-DC+Dendritic cells	20	GRN_TNFRSF1B	0.578	0.260126	4
Ly	Mp-DC+Dendritic cells	45	TGFbeta receptor1_TGFB1	0.214	0.0963096	4
Ly	Mp-DC+Dendritic cells	48	aMb2 complex_F10	0.291	0.130963	4
Ly	Mp-DC+Dendritic cells	50	CCL15_CCR1	0.416	0.187219	4
Ly	Mp-DC+Dendritic cells	51	aMb2 complex_C3	0.22	0.0990099	4
Ly	Mp-DC+Dendritic cells	57	PLAUR_a4b1 complex	0.81	0.364536	4
Ly	Mp-DC+Dendritic cells	58	CD74_MIF	1.3	0.585059	4
Ly	Mp-DC+Dendritic cells	67	a5b1 complex_FN1	0.265	0.119262	4
Ly	Mp-DC+Dendritic cells	68	CSF1_CSF1R	0.501	0.225473	4
Ly	Mp-DC+Dendritic cells	105	CCL18_CCR1	1.2	0.540054	4
Ly	Mp-DC+Dendritic cells	131	CCL5_CCR1	1.631	0.734023	4
Ly	Mp-DC+Dendritic cells	133	TNF_TNFRSF1B	0.413	0.185869	4
Ly	Mp-DC+Dendritic cells	135	ANXA1_FPR1	0.581	0.261476	4
Ly	Mp-DC+Dendritic cells	137	ANXA1_FPR3	0.796	0.358236	4
Ly	Mp-DC+Dendritic cells	138	CCL2_CCR2	1.576	0.709271	4
Ly	Mp-DC+Dendritic cells	142	CCL7_CCR1	0.466	0.209721	4
Ly	Mp-DC+Dendritic cells	143	C3_C3AR1	0.339	0.152565	4
Ly	Mp-DC+Dendritic cells	144	CCL7_CCR2	0.534	0.240324	4
Ly	Mp-DC+Dendritic cells	147	IL1 receptor inhibitor_IL1RN	1.034	0.465347	4
Ly	Mp-DC+Dendritic cells	148	IL1 receptor inhibitor_IL1B	0.705	0.317282	4
Ly	Mp-DC+Dendritic cells	152	CCL5_CCR5	1.59	0.715572	4
Ly	Mp-DC+Dendritic cells	157	CCL7_CCR5	0.425	0.191269	4
Ly	Mp-DC+Dendritic cells	158	ADORA2A_NAMPT	0.604	0.271827	4
Ly	Mp-DC+Dendritic cells	159	CCR5_CCL4	1.435	0.645815	4
Ly	Mp-DC+Dendritic cells	160	CSF3_CSF1R	0.277	0.124662	4
Ly	Mp-DC+Dendritic cells	162	CSF3_CSF3R	0.307	0.138164	4
Ly	Mp-DC+Dendritic cells	163	TNF_TNFRSF1A	0.222	0.09991	4
Ly	Mp-DC+Dendritic cells	164	IL6 receptor_IL6	0.182	0.0819082	4
Ly	Ne	5	JAM3_aMb2 complex	0.168	0.0756076	4
Ly	Ne	18	HBEGF_CD44	0.486	0.218722	4
Ly	Ne	20	GRN_TNFRSF1B	0.481	0.216472	4
Ly	Ne	26	GRN_TNFRSF1A	0.46	0.207021	4
Ly	Ne	50	CCL15_CCR1	0.794	0.357336	4
Ly	Ne	51	aMb2 complex_C3	0.413	0.185869	4
Ly	Ne	58	CD74_MIF	1.169	0.526103	4
Ly	Ne	105	CCL18_CCR1	1.578	0.710171	4
Ly	Ne	131	CCL5_CCR1	2.01	0.90459	4
Ly	Ne	133	TNF_TNFRSF1B	0.316	0.142214	4
Ly	Ne	135	ANXA1_FPR1	1.209	0.544104	4
Ly	Ne	136	FAS_TNF	0.591	0.265977	4
Ly	Ne	137	ANXA1_FPR3	0.954	0.429343	4
Ly	Ne	142	CCL7_CCR1	0.845	0.380288	4
Ly	Ne	146	IL1 receptor inhibitor_IL1A	0.249	0.112061	4
Ly	Ne	147	IL1 receptor inhibitor_IL1RN	1.48	0.666067	4
Ly	Ne	148	IL1 receptor inhibitor_IL1B	1.958	0.881188	4
Ly	Ne	158	ADORA2A_NAMPT	0.598	0.269127	4
Ly	Ne	159	CCR5_CCL4	1.903	0.856436	4
Ly	Ne	161	OSMR_OSM	1.1	0.49505	4
Ly	Ne	162	CSF3_CSF3R	0.559	0.251575	4
Ly	Ne	163	TNF_TNFRSF1A	0.295	0.132763	4
Ly	Peri / St	7	IL15_IL15RA	0.473	0.212871	4
Ly	Peri / St	14	GAS6_AXL	0.503	0.226373	4
Ly	Peri / St	16	HBEGF_EGFR	0.348	0.156616	4
Ly	Peri / St	18	HBEGF_CD44	0.577	0.259676	4
Ly	Peri / St	26	GRN_TNFRSF1A	0.472	0.212421	4
Ly	Peri / St	32	NRG1_EGFR	0.231	0.10396	4
Ly	Peri / St	51	aMb2 complex_C3	0.621	0.279478	4
Ly	Peri / St	58	CD74_MIF	1.479	0.665617	4
Ly	Peri / St	81	NRP2_SEMA3C	0.283	0.127363	4
Ly	Peri / St	102	BMP2_BMPR1A_BMPR2	0.176	0.0792079	4
Ly	Peri / St	118	FGFR1_NCAM1	0.164	0.0738074	4
Ly	Peri / St	158	ADORA2A_NAMPT	0.621	0.279478	4
Ly	Peri / St	163	TNF_TNFRSF1A	0.307	0.138164	4
Ly	Peri / St	164	IL6 receptor_IL6	0.261	0.117462	4
Ly	S1	16	HBEGF_EGFR	0.347	0.156166	4
Ly	S1	32	NRG1_EGFR	0.23	0.10351	4
Ly	S1	44	NRP1_VEGFA	0.392	0.176418	4
Ly	S1	51	aMb2 complex_C3	0.357	0.160666	4
Ly	S1	58	CD74_MIF	1.88	0.846085	4
Ly	S1	78	KDR_VEGFA	0.511	0.229973	4
Ly	S1	79	NRP2_VEGFA	0.274	0.123312	4
Ly	S1	80	FLT1 complex_VEGFA	0.511	0.229973	4
Ly	S1	83	FLT1_VEGFA	0.846	0.380738	4
Ly	S1	134	TNF_RIPK1	0.182	0.0819082	4
Ly	S1	158	ADORA2A_NAMPT	0.473	0.212871	4
Ly	S1	163	TNF_TNFRSF1A	0.207	0.0931593	4
Ly	S3	16	HBEGF_EGFR	0.313	0.140864	4
Ly	S3	30	NRG1_ERBB3	0.245	0.110261	4
Ly	S3	44	NRP1_VEGFA	0.41	0.184518	4
Ly	S3	51	aMb2 complex_C3	0.198	0.0891089	4
Ly	S3	56	RIPK1_TNFSF10	0.535	0.240774	4
Ly	S3	58	CD74_MIF	1.527	0.687219	4
Ly	S3	78	KDR_VEGFA	0.529	0.238074	4
Ly	S3	79	NRP2_VEGFA	0.293	0.131863	4
Ly	S3	80	FLT1 complex_VEGFA	0.529	0.238074	4
Ly	S3	81	NRP2_SEMA3C	0.205	0.0922592	4
Ly	S3	83	FLT1_VEGFA	0.864	0.388839	4
Ly	S3	163	TNF_TNFRSF1A	0.175	0.0787579	4
Mp-DC+Dendritic cells	Prolif cells	26	GRN_TNFRSF1A	0.445	0.173828	4
Mp-DC+Dendritic cells	Prolif cells	58	CD74_MIF	2.479	0.968359	4
Mp-DC+Dendritic cells	Prolif cells	149	CXCL10_DPP4	1.459	0.569922	4
Mp-DC+Dendritic cells	Prolif cells	154	CCL22_DPP4	0.185	0.0722656	4
Mp-DC+Dendritic cells	Prolif cells	156	CXCL9_DPP4	0.346	0.135156	4
Mp-DC+Dendritic cells	Endo	7	IL15_IL15RA	0.362	0.141406	4
Mp-DC+Dendritic cells	Endo	23	a6b1 complex_LAMC1	0.3	0.117188	4
Mp-DC+Dendritic cells	Endo	26	GRN_TNFRSF1A	0.589	0.230078	4
Mp-DC+Dendritic cells	Endo	58	CD74_MIF	1.915	0.748047	4
Mp-DC+Dendritic cells	Endo	158	ADORA2A_NAMPT	0.702	0.274219	4
Mp-DC+Dendritic cells	Endo	159	CCR5_CCL4	0.227	0.0886719	4
Mp-DC+Dendritic cells	Ly	7	IL15_IL15RA	0.445	0.173828	4
Mp-DC+Dendritic cells	Ly	20	GRN_TNFRSF1B	0.692	0.270313	4
Mp-DC+Dendritic cells	Ly	23	a6b1 complex_LAMC1	0.294	0.114844	4
Mp-DC+Dendritic cells	Ly	26	GRN_TNFRSF1A	0.516	0.201563	4
Mp-DC+Dendritic cells	Ly	48	aMb2 complex_F10	0.284	0.110937	4
Mp-DC+Dendritic cells	Ly	50	CCL15_CCR1	0.696	0.271875	4
Mp-DC+Dendritic cells	Ly	51	aMb2 complex_C3	0.36	0.140625	4
Mp-DC+Dendritic cells	Ly	58	CD74_MIF	2.019	0.788672	4
Mp-DC+Dendritic cells	Ly	105	CCL18_CCR1	0.812	0.317188	4
Mp-DC+Dendritic cells	Ly	128	CCL8_CCR1	0.343	0.133984	4
Mp-DC+Dendritic cells	Ly	130	CCL8_CCR2	0.328	0.128125	4
Mp-DC+Dendritic cells	Ly	131	CCL5_CCR1	1.878	0.733594	4
Mp-DC+Dendritic cells	Ly	135	ANXA1_FPR1	0.353	0.137891	4
Mp-DC+Dendritic cells	Ly	136	FAS_TNF	0.375	0.146484	4
Mp-DC+Dendritic cells	Ly	137	ANXA1_FPR3	0.655	0.255859	4
Mp-DC+Dendritic cells	Ly	138	CCL2_CCR2	0.535	0.208984	4
Mp-DC+Dendritic cells	Ly	142	CCL7_CCR1	0.286	0.111719	4
Mp-DC+Dendritic cells	Ly	144	CCL7_CCR2	0.271	0.105859	4
Mp-DC+Dendritic cells	Ly	152	CCL5_CCR5	1.846	0.721094	4
Mp-DC+Dendritic cells	Ly	155	CCL8_CCR5	0.312	0.121875	4
Mp-DC+Dendritic cells	Ly	157	CCL7_CCR5	0.254	0.0992187	4
Mp-DC+Dendritic cells	Ly	158	ADORA2A_NAMPT	0.825	0.322266	4
Mp-DC+Dendritic cells	Ly	159	CCR5_CCL4	1.843	0.719922	4
Mp-DC+Dendritic cells	Mp-DC+Dendritic cells	7	IL15_IL15RA	0.345	0.134766	4
Mp-DC+Dendritic cells	Mp-DC+Dendritic cells	15	aVb1 complex_FN1	0.251	0.0980469	4
Mp-DC+Dendritic cells	Mp-DC+Dendritic cells	20	GRN_TNFRSF1B	0.688	0.26875	4
Mp-DC+Dendritic cells	Mp-DC+Dendritic cells	26	GRN_TNFRSF1A	0.497	0.194141	4
Mp-DC+Dendritic cells	Mp-DC+Dendritic cells	48	aMb2 complex_F10	0.301	0.117578	4
Mp-DC+Dendritic cells	Mp-DC+Dendritic cells	50	CCL15_CCR1	0.752	0.29375	4
Mp-DC+Dendritic cells	Mp-DC+Dendritic cells	51	aMb2 complex_C3	0.23	0.0898438	4
Mp-DC+Dendritic cells	Mp-DC+Dendritic cells	54	a4b1 complex_FN1	0.289	0.112891	4
Mp-DC+Dendritic cells	Mp-DC+Dendritic cells	57	PLAUR_a4b1 complex	0.376	0.146875	4
Mp-DC+Dendritic cells	Mp-DC+Dendritic cells	58	CD74_MIF	1.979	0.773047	4
Mp-DC+Dendritic cells	Mp-DC+Dendritic cells	105	CCL18_CCR1	0.868	0.339062	4
Mp-DC+Dendritic cells	Mp-DC+Dendritic cells	128	CCL8_CCR1	0.399	0.155859	4
Mp-DC+Dendritic cells	Mp-DC+Dendritic cells	130	CCL8_CCR2	0.467	0.182422	4
Mp-DC+Dendritic cells	Mp-DC+Dendritic cells	131	CCL5_CCR1	1.934	0.755469	4
Mp-DC+Dendritic cells	Mp-DC+Dendritic cells	135	ANXA1_FPR1	0.261	0.101953	4
Mp-DC+Dendritic cells	Mp-DC+Dendritic cells	137	ANXA1_FPR3	0.476	0.185938	4
Mp-DC+Dendritic cells	Mp-DC+Dendritic cells	138	CCL2_CCR2	0.674	0.263281	4
Mp-DC+Dendritic cells	Mp-DC+Dendritic cells	142	CCL7_CCR1	0.342	0.133594	4
Mp-DC+Dendritic cells	Mp-DC+Dendritic cells	143	C3_C3AR1	0.208	0.08125	4
Mp-DC+Dendritic cells	Mp-DC+Dendritic cells	144	CCL7_CCR2	0.41	0.160156	4
Mp-DC+Dendritic cells	Mp-DC+Dendritic cells	152	CCL5_CCR5	1.892	0.739062	4
Mp-DC+Dendritic cells	Mp-DC+Dendritic cells	155	CCL8_CCR5	0.358	0.139844	4
Mp-DC+Dendritic cells	Mp-DC+Dendritic cells	157	CCL7_CCR5	0.3	0.117188	4
Mp-DC+Dendritic cells	Mp-DC+Dendritic cells	158	ADORA2A_NAMPT	0.579	0.226172	4
Mp-DC+Dendritic cells	Mp-DC+Dendritic cells	159	CCR5_CCL4	1.481	0.578516	4
Mp-DC+Dendritic cells	Ne	20	GRN_TNFRSF1B	0.591	0.230859	4
Mp-DC+Dendritic cells	Ne	26	GRN_TNFRSF1A	0.569	0.222266	4
Mp-DC+Dendritic cells	Ne	50	CCL15_CCR1	1.131	0.441797	4
Mp-DC+Dendritic cells	Ne	51	aMb2 complex_C3	0.423	0.165234	4
Mp-DC+Dendritic cells	Ne	58	CD74_MIF	1.848	0.721875	4
Mp-DC+Dendritic cells	Ne	105	CCL18_CCR1	1.247	0.487109	4
Mp-DC+Dendritic cells	Ne	128	CCL8_CCR1	0.778	0.303906	4
Mp-DC+Dendritic cells	Ne	131	CCL5_CCR1	2.312	0.903125	4
Mp-DC+Dendritic cells	Ne	135	ANXA1_FPR1	0.889	0.347266	4
Mp-DC+Dendritic cells	Ne	136	FAS_TNF	0.374	0.146094	4
Mp-DC+Dendritic cells	Ne	137	ANXA1_FPR3	0.634	0.247656	4
Mp-DC+Dendritic cells	Ne	142	CCL7_CCR1	0.72	0.28125	4
Mp-DC+Dendritic cells	Ne	158	ADORA2A_NAMPT	0.573	0.223828	4
Mp-DC+Dendritic cells	Ne	159	CCR5_CCL4	1.949	0.761328	4
Mp-DC+Dendritic cells	Peri / St	7	IL15_IL15RA	0.315	0.123047	4
Mp-DC+Dendritic cells	Peri / St	26	GRN_TNFRSF1A	0.581	0.226953	4
Mp-DC+Dendritic cells	Peri / St	51	aMb2 complex_C3	0.631	0.246484	4
Mp-DC+Dendritic cells	Peri / St	58	CD74_MIF	2.159	0.843359	4
Mp-DC+Dendritic cells	Peri / St	59	a4b1 complex_SPP1	1.859	0.726172	4
Mp-DC+Dendritic cells	Peri / St	153	TNFSF9_TNFRSF9	0.258	0.100781	4
Mp-DC+Dendritic cells	Peri / St	158	ADORA2A_NAMPT	0.596	0.232813	4
Mp-DC+Dendritic cells	S1	26	GRN_TNFRSF1A	0.481	0.187891	4
Mp-DC+Dendritic cells	S1	51	aMb2 complex_C3	0.367	0.143359	4
Mp-DC+Dendritic cells	S1	58	CD74_MIF	2.56	1	4
Mp-DC+Dendritic cells	S1	59	a4b1 complex_SPP1	2.039	0.796484	4
Mp-DC+Dendritic cells	S1	158	ADORA2A_NAMPT	0.448	0.175	4
Mp-DC+Dendritic cells	S1	159	CCR5_CCL4	0.231	0.0902344	4
Mp-DC+Dendritic cells	S3	26	GRN_TNFRSF1A	0.449	0.175391	4
Mp-DC+Dendritic cells	S3	51	aMb2 complex_C3	0.208	0.08125	4
Mp-DC+Dendritic cells	S3	58	CD74_MIF	2.206	0.861719	4
Mp-DC+Dendritic cells	S3	159	CCR5_CCL4	0.227	0.0886719	4
Ne	Prolif cells	58	CD74_MIF	1.465	0.603129	4
Ne	Prolif cells	132	TNF_LTBR	0.169	0.069576	4
Ne	Endo	163	TNF_TNFRSF1A	0.314	0.129271	4
Ne	Ly	48	aMb2 complex_F10	0.256	0.105393	4
Ne	Ly	51	aMb2 complex_C3	0.333	0.137093	4
Ne	Ly	105	CCL18_CCR1	1.994	0.820914	4
Ne	Ly	131	CCL5_CCR1	0.5	0.205846	4
Ne	Ly	132	TNF_LTBR	0.155	0.0638123	4
Ne	Ly	133	TNF_TNFRSF1B	0.417	0.171676	4
Ne	Ly	134	TNF_RIPK1	0.226	0.0930424	4
Ne	Ly	135	ANXA1_FPR1	0.379	0.156031	4
Ne	Ly	136	FAS_TNF	0.62	0.255249	4
Ne	Ly	137	ANXA1_FPR3	0.681	0.280362	4
Ne	Ly	147	IL1 receptor inhibitor_IL1RN	1.104	0.454508	4
Ne	Ly	148	IL1 receptor inhibitor_IL1B	1.301	0.535611	4
Ne	Ly	163	TNF_TNFRSF1A	0.24	0.0988061	4
Ne	Mp-DC+Dendritic cells	48	aMb2 complex_F10	0.274	0.112804	4
Ne	Mp-DC+Dendritic cells	51	aMb2 complex_C3	0.202	0.0831618	4
Ne	Mp-DC+Dendritic cells	57	PLAUR_a4b1 complex	0.826	0.340058	4
Ne	Mp-DC+Dendritic cells	105	CCL18_CCR1	2.05	0.843969	4
Ne	Mp-DC+Dendritic cells	131	CCL5_CCR1	0.556	0.228901	4
Ne	Mp-DC+Dendritic cells	133	TNF_TNFRSF1B	0.413	0.170029	4
Ne	Mp-DC+Dendritic cells	135	ANXA1_FPR1	0.287	0.118156	4
Ne	Mp-DC+Dendritic cells	137	ANXA1_FPR3	0.502	0.206669	4
Ne	Mp-DC+Dendritic cells	143	C3_C3AR1	0.401	0.165089	4
Ne	Mp-DC+Dendritic cells	147	IL1 receptor inhibitor_IL1RN	1.12	0.461095	4
Ne	Mp-DC+Dendritic cells	148	IL1 receptor inhibitor_IL1B	0.791	0.325648	4
Ne	Mp-DC+Dendritic cells	152	CCL5_CCR5	0.515	0.212021	4
Ne	Mp-DC+Dendritic cells	163	TNF_TNFRSF1A	0.221	0.0909839	4
Ne	Ne	51	aMb2 complex_C3	0.395	0.162618	4
Ne	Ne	105	CCL18_CCR1	2.429	1	4
Ne	Ne	131	CCL5_CCR1	0.935	0.384932	4
Ne	Ne	133	TNF_TNFRSF1B	0.315	0.129683	4
Ne	Ne	135	ANXA1_FPR1	0.915	0.376698	4
Ne	Ne	136	FAS_TNF	0.62	0.255249	4
Ne	Ne	137	ANXA1_FPR3	0.659	0.271305	4
Ne	Ne	146	IL1 receptor inhibitor_IL1A	0.334	0.137505	4
Ne	Ne	147	IL1 receptor inhibitor_IL1RN	1.565	0.644298	4
Ne	Ne	148	IL1 receptor inhibitor_IL1B	2.043	0.841087	4
Ne	Ne	163	TNF_TNFRSF1A	0.294	0.121037	4
Ne	Peri / St	51	aMb2 complex_C3	0.603	0.24825	4
Ne	Peri / St	58	CD74_MIF	1.144	0.470976	4
Ne	Peri / St	163	TNF_TNFRSF1A	0.306	0.125978	4
Ne	S1	51	aMb2 complex_C3	0.34	0.139975	4
Ne	S1	58	CD74_MIF	1.546	0.636476	4
Ne	S1	134	TNF_RIPK1	0.181	0.0745163	4
Ne	S1	163	TNF_TNFRSF1A	0.206	0.0848086	4
Ne	S3	51	aMb2 complex_C3	0.18	0.0741046	4
Ne	S3	58	CD74_MIF	1.192	0.490737	4
Ne	S3	163	TNF_TNFRSF1A	0.174	0.0716344	4
Peri / St	Prolif cells	58	CD74_MIF	1.301	0.566391	4
Peri / St	Prolif cells	149	CXCL10_DPP4	1.838	0.800174	4
Peri / St	Endo	7	IL15_IL15RA	0.282	0.122769	4
Peri / St	Endo	17	EGFR_TGFB1	0.255	0.111014	4
Peri / St	Endo	23	a6b1 complex_LAMC1	0.514	0.22377	4
Peri / St	Endo	24	aVb6 complex_TGFB1	0.264	0.114933	4
Peri / St	Endo	26	GRN_TNFRSF1A	0.421	0.183283	4
Peri / St	Endo	45	TGFbeta receptor1_TGFB1	0.239	0.104049	4
Peri / St	Endo	104	TGFBR3_TGFB1	0.214	0.093165	4
Peri / St	Endo	151	TNFSF10_TNFRSF11B	0.496	0.215934	4
Peri / St	Ly	7	IL15_IL15RA	0.365	0.158903	4
Peri / St	Ly	17	EGFR_TGFB1	0.375	0.163256	4
Peri / St	Ly	18	HBEGF_CD44	0.539	0.234654	4
Peri / St	Ly	20	GRN_TNFRSF1B	0.524	0.228124	4
Peri / St	Ly	23	a6b1 complex_LAMC1	0.508	0.221158	4
Peri / St	Ly	24	aVb6 complex_TGFB1	0.383	0.166739	4
Peri / St	Ly	25	SPP1_CD44	2.065	0.898999	4
Peri / St	Ly	45	TGFbeta receptor1_TGFB1	0.359	0.156291	4
Peri / St	Ly	87	ANGPT2_TEK	0.208	0.0905529	4
Peri / St	Ly	104	TGFBR3_TGFB1	0.333	0.144972	4
Peri / St	Ly	131	CCL5_CCR1	0.639	0.278189	4
Peri / St	Ly	135	ANXA1_FPR1	0.391	0.170222	4
Peri / St	Ly	136	FAS_TNF	0.434	0.188942	4
Peri / St	Ly	137	ANXA1_FPR3	0.693	0.301698	4
Peri / St	Ly	138	CCL2_CCR2	0.867	0.377449	4
Peri / St	Ly	142	CCL7_CCR1	0.304	0.132347	4
Peri / St	Ly	144	CCL7_CCR2	0.289	0.125816	4
Peri / St	Ly	151	TNFSF10_TNFRSF11B	0.42	0.182847	4
Peri / St	Ly	152	CCL5_CCR5	0.608	0.264693	4
Peri / St	Ly	157	CCL7_CCR5	0.273	0.118851	4
Peri / St	Mp-DC+Dendritic cells	7	IL15_IL15RA	0.266	0.115803	4
Peri / St	Mp-DC+Dendritic cells	15	aVb1 complex_FN1	0.465	0.202438	4
Peri / St	Mp-DC+Dendritic cells	17	EGFR_TGFB1	0.237	0.103178	4
Peri / St	Mp-DC+Dendritic cells	18	HBEGF_CD44	0.686	0.29865	4
Peri / St	Mp-DC+Dendritic cells	20	GRN_TNFRSF1B	0.52	0.226382	4
Peri / St	Mp-DC+Dendritic cells	24	aVb6 complex_TGFB1	0.246	0.107096	4
Peri / St	Mp-DC+Dendritic cells	25	SPP1_CD44	2.212	0.962995	4
Peri / St	Mp-DC+Dendritic cells	40	aVb5 complex_FN1	0.226	0.0983892	4
Peri / St	Mp-DC+Dendritic cells	45	TGFbeta receptor1_TGFB1	0.222	0.0966478	4
Peri / St	Mp-DC+Dendritic cells	57	PLAUR_a4b1 complex	0.39	0.169787	4
Peri / St	Mp-DC+Dendritic cells	68	CSF1_CSF1R	0.358	0.155855	4
Peri / St	Mp-DC+Dendritic cells	89	IL34_CSF1R	0.276	0.120157	4
Peri / St	Mp-DC+Dendritic cells	104	TGFBR3_TGFB1	0.196	0.0853287	4
Peri / St	Mp-DC+Dendritic cells	131	CCL5_CCR1	0.695	0.302569	4
Peri / St	Mp-DC+Dendritic cells	135	ANXA1_FPR1	0.299	0.13017	4
Peri / St	Mp-DC+Dendritic cells	137	ANXA1_FPR3	0.514	0.22377	4
Peri / St	Mp-DC+Dendritic cells	138	CCL2_CCR2	1.006	0.437963	4
Peri / St	Mp-DC+Dendritic cells	142	CCL7_CCR1	0.36	0.156726	4
Peri / St	Mp-DC+Dendritic cells	143	C3_C3AR1	0.609	0.265128	4
Peri / St	Mp-DC+Dendritic cells	144	CCL7_CCR2	0.428	0.18633	4
Peri / St	Mp-DC+Dendritic cells	152	CCL5_CCR5	0.654	0.284719	4
Peri / St	Mp-DC+Dendritic cells	157	CCL7_CCR5	0.318	0.138441	4
Peri / St	Ne	18	HBEGF_CD44	0.443	0.19286	4
Peri / St	Ne	20	GRN_TNFRSF1B	0.423	0.184153	4
Peri / St	Ne	25	SPP1_CD44	1.969	0.857205	4
Peri / St	Ne	26	GRN_TNFRSF1A	0.401	0.174576	4
Peri / St	Ne	131	CCL5_CCR1	1.074	0.467566	4
Peri / St	Ne	135	ANXA1_FPR1	0.927	0.40357	4
Peri / St	Ne	136	FAS_TNF	0.433	0.188507	4
Peri / St	Ne	137	ANXA1_FPR3	0.672	0.292556	4
Peri / St	Ne	142	CCL7_CCR1	0.739	0.321724	4
Peri / St	Ne	150	CXCL6_CXCR2	0.736	0.320418	4
Peri / St	Ne	161	OSMR_OSM	1.197	0.521114	4
Peri / St	Peri / St	14	GAS6_AXL	0.503	0.218981	4
Peri / St	Peri / St	16	HBEGF_EGFR	0.304	0.132347	4
Peri / St	Peri / St	18	HBEGF_CD44	0.534	0.232477	4
Peri / St	Peri / St	25	SPP1_CD44	2.06	0.896822	4
Peri / St	Peri / St	26	GRN_TNFRSF1A	0.413	0.1798	4
Peri / St	S1	16	HBEGF_EGFR	0.304	0.132347	4
Peri / St	S1	58	CD74_MIF	1.381	0.601219	4
Peri / St	S3	16	HBEGF_EGFR	0.27	0.117545	4
Peri / St	S3	44	NRP1_VEGFA	0.315	0.137135	4
S1	Prolif cells	149	CXCL10_DPP4	1.656	0.668551	4
S1	Endo	7	IL15_IL15RA	0.295	0.119096	4
S1	Endo	17	EGFR_TGFB1	0.254	0.102543	4
S1	Endo	23	a6b1 complex_LAMC1	0.281	0.113444	4
S1	Endo	24	aVb6 complex_TGFB1	0.242	0.0976988	4
S1	Endo	26	GRN_TNFRSF1A	0.42	0.16956	4
S1	Endo	56	RIPK1_TNFSF10	0.736	0.297134	4
S1	Ly	7	IL15_IL15RA	0.379	0.153008	4
S1	Ly	17	EGFR_TGFB1	0.374	0.150989	4
S1	Ly	20	GRN_TNFRSF1B	0.523	0.211143	4
S1	Ly	23	a6b1 complex_LAMC1	0.274	0.110618	4
S1	Ly	24	aVb6 complex_TGFB1	0.362	0.146145	4
S1	Ly	25	SPP1_CD44	2.245	0.906338	4
S1	Ly	56	RIPK1_TNFSF10	0.873	0.352442	4
S1	Ly	136	FAS_TNF	0.286	0.115462	4
S1	Mp-DC+Dendritic cells	7	IL15_IL15RA	0.279	0.112636	4
S1	Mp-DC+Dendritic cells	15	aVb1 complex_FN1	0.231	0.093258	4
S1	Mp-DC+Dendritic cells	17	EGFR_TGFB1	0.237	0.0956803	4
S1	Mp-DC+Dendritic cells	20	GRN_TNFRSF1B	0.519	0.209528	4
S1	Mp-DC+Dendritic cells	24	aVb6 complex_TGFB1	0.225	0.0908357	4
S1	Mp-DC+Dendritic cells	25	SPP1_CD44	2.392	0.965684	4
S1	Mp-DC+Dendritic cells	26	GRN_TNFRSF1A	0.328	0.132418	4
S1	Mp-DC+Dendritic cells	89	IL34_CSF1R	0.178	0.0718611	4
S1	Mp-DC+Dendritic cells	131	CCL5_CCR1	0.398	0.160678	4
S1	Mp-DC+Dendritic cells	138	CCL2_CCR2	0.337	0.136052	4
S1	Mp-DC+Dendritic cells	143	C3_C3AR1	0.345	0.139281	4
S1	Ne	20	GRN_TNFRSF1B	0.422	0.170367	4
S1	Ne	25	SPP1_CD44	2.149	0.867582	4
S1	Ne	26	GRN_TNFRSF1A	0.4	0.161486	4
S1	Ne	131	CCL5_CCR1	0.777	0.313686	4
S1	Ne	136	FAS_TNF	0.285	0.115059	4
S1	Peri / St	7	IL15_IL15RA	0.249	0.100525	4
S1	Peri / St	10	TTR_DDR1	0.474	0.191361	4
S1	Peri / St	14	GAS6_AXL	0.625	0.252321	4
S1	Peri / St	25	SPP1_CD44	2.24	0.90432	4
S1	Peri / St	26	GRN_TNFRSF1A	0.412	0.16633	4
S1	S1	10	TTR_DDR1	0.485	0.195801	4
S1	S1	26	GRN_TNFRSF1A	0.313	0.126363	4
S1	S1	58	CD74_MIF	1.222	0.493339	4
S1	S3	56	RIPK1_TNFSF10	0.49	0.19782	4
S3	Prolif cells	43	EFNA1_EPHA2	0.138	0.118455	4
S3	Endo	17	EGFR_TGFB1	0.22	0.188841	4
S3	Endo	23	a6b1 complex_LAMC1	0.303	0.260086	4
S3	Endo	24	aVb6 complex_TGFB1	0.258	0.221459	4
S3	Endo	26	GRN_TNFRSF1A	0.372	0.319313	4
S3	Endo	151	TNFSF10_TNFRSF11B	0.591	0.507296	4
S3	Ly	6	FGF1_FGFR1	0.137	0.117597	4
S3	Ly	7	IL15_IL15RA	0.309	0.265236	4
S3	Ly	17	EGFR_TGFB1	0.34	0.291845	4
S3	Ly	18	HBEGF_CD44	0.452	0.387983	4
S3	Ly	20	GRN_TNFRSF1B	0.475	0.407725	4
S3	Ly	23	a6b1 complex_LAMC1	0.297	0.254936	4
S3	Ly	24	aVb6 complex_TGFB1	0.378	0.324464	4
S3	Ly	136	FAS_TNF	0.232	0.199142	4
S3	Ly	151	TNFSF10_TNFRSF11B	0.514	0.441202	4
S3	Mp-DC+Dendritic cells	15	aVb1 complex_FN1	0.254	0.218026	4
S3	Mp-DC+Dendritic cells	17	EGFR_TGFB1	0.203	0.174249	4
S3	Mp-DC+Dendritic cells	18	HBEGF_CD44	0.599	0.514163	4
S3	Mp-DC+Dendritic cells	20	GRN_TNFRSF1B	0.471	0.404292	4
S3	Mp-DC+Dendritic cells	24	aVb6 complex_TGFB1	0.241	0.206867	4
S3	Mp-DC+Dendritic cells	89	IL34_CSF1R	0.162	0.139056	4
S3	Mp-DC+Dendritic cells	131	CCL5_CCR1	0.434	0.372532	4
S3	Mp-DC+Dendritic cells	138	CCL2_CCR2	0.341	0.292704	4
S3	Mp-DC+Dendritic cells	143	C3_C3AR1	0.186	0.159657	4
S3	Mp-DC+Dendritic cells	152	CCL5_CCR5	0.393	0.337339	4
S3	Ne	18	HBEGF_CD44	0.356	0.305579	4
S3	Ne	20	GRN_TNFRSF1B	0.374	0.32103	4
S3	Ne	26	GRN_TNFRSF1A	0.352	0.302146	4
S3	Ne	131	CCL5_CCR1	0.813	0.697854	4
S3	Ne	136	FAS_TNF	0.232	0.199142	4
S3	Ne	150	CXCL6_CXCR2	0.302	0.259227	4
S3	Peri / St	10	TTR_DDR1	0.529	0.454077	4
S3	Peri / St	14	GAS6_AXL	0.532	0.456652	4
S3	Peri / St	16	HBEGF_EGFR	0.217	0.186266	4
S3	Peri / St	18	HBEGF_CD44	0.446	0.382833	4
S3	Peri / St	26	GRN_TNFRSF1A	0.365	0.313305	4
S3	S1	10	TTR_DDR1	0.54	0.463519	4
S3	S1	16	HBEGF_EGFR	0.216	0.185408	4
S3	S1	44	NRP1_VEGFA	0.367	0.315021	4
S3	S1	58	CD74_MIF	1.165	1	4
S3	S3	10	TTR_DDR1	0.464	0.398283	4
S3	S3	16	HBEGF_EGFR	0.183	0.157082	4
S3	S3	44	NRP1_VEGFA	0.386	0.33133	4
Prolif cells	Prolif cells	58	CD74_MIF	1.98	0.661765	16
Prolif cells	Ly	58	CD74_MIF	2.158	0.721257	16
Prolif cells	Ne	25	SPP1_CD44	2.992	1	16
Prolif cells	Ne	131	CCL5_CCR1	0.594	0.198529	16
Prolif cells	Peri / St	10	TTR_DDR1	0.383	0.128008	16
Prolif cells	Peri / St	14	GAS6_AXL	0.26	0.0868984	16
Prolif cells	S1	58	CD74_MIF	1.854	0.619652	16
Prolif cells	S3	58	CD74_MIF	1.889	0.63135	16
Endo	Prolif cells	58	CD74_MIF	2.011	0.918684	16
Endo	Ly	58	CD74_MIF	2.189	1	16
Endo	Mp-DC+Dendritic cells	58	CD74_MIF	1.558	0.711741	16
Endo	Ne	131	CCL5_CCR1	0.535	0.244404	16
Endo	Peri / St	58	CD74_MIF	1.577	0.72042	16
Endo	S1	58	CD74_MIF	1.885	0.861124	16
Endo	S1	74	JAM2_JAM3	0.357	0.163088	16
Endo	S3	58	CD74_MIF	1.92	0.877113	16
Ly	Prolif cells	58	CD74_MIF	2.793	0.940088	16
Ly	Ly	58	CD74_MIF	2.971	1	16
Ly	Mp-DC+Dendritic cells	58	CD74_MIF	2.34	0.787614	16
Ly	Mp-DC+Dendritic cells	165	CCL19_CCR7	0.873	0.29384	16
Ly	Ne	131	CCL5_CCR1	1.92	0.646247	16
Ly	Ne	166	CCL19_CCRL2	0.786	0.264557	16
Ly	Peri / St	58	CD74_MIF	2.359	0.794009	16
Ly	S1	58	CD74_MIF	2.667	0.897678	16
Ly	S1	74	JAM2_JAM3	0.688	0.231572	16
Ly	S3	58	CD74_MIF	2.702	0.909458	16
Mp-DC+Dendritic cells	Prolif cells	58	CD74_MIF	2.57	0.935226	16
Mp-DC+Dendritic cells	Endo	51	aMb2 complex_C3	0.321	0.116812	16
Mp-DC+Dendritic cells	Endo	58	CD74_MIF	1.894	0.689229	16
Mp-DC+Dendritic cells	Ly	58	CD74_MIF	2.748	1	16
Mp-DC+Dendritic cells	Ly	137	ANXA1_FPR3	0.66	0.240175	16
Mp-DC+Dendritic cells	Mp-DC+Dendritic cells	58	CD74_MIF	2.117	0.770378	16
Mp-DC+Dendritic cells	Mp-DC+Dendritic cells	137	ANXA1_FPR3	0.243	0.0884279	16
Mp-DC+Dendritic cells	Ne	51	aMb2 complex_C3	0.382	0.13901	16
Mp-DC+Dendritic cells	Ne	58	CD74_MIF	1.656	0.60262	16
Mp-DC+Dendritic cells	Ne	131	CCL5_CCR1	1.861	0.67722	16
Mp-DC+Dendritic cells	Ne	135	ANXA1_FPR1	1.146	0.417031	16
Mp-DC+Dendritic cells	Ne	137	ANXA1_FPR3	1.109	0.403566	16
Mp-DC+Dendritic cells	Peri / St	51	aMb2 complex_C3	0.69	0.251092	16
Mp-DC+Dendritic cells	Peri / St	58	CD74_MIF	2.136	0.777293	16
Mp-DC+Dendritic cells	S1	51	aMb2 complex_C3	0.648	0.235808	16
Mp-DC+Dendritic cells	S1	58	CD74_MIF	2.444	0.889374	16
Mp-DC+Dendritic cells	S3	51	aMb2 complex_C3	0.567	0.206332	16
Mp-DC+Dendritic cells	S3	58	CD74_MIF	2.479	0.902111	16
Ne	Prolif cells	51	aMb2 complex_C3	0.674	0.352142	16
Ne	Endo	51	aMb2 complex_C3	0.537	0.280564	16
Ne	Ly	137	ANXA1_FPR3	1.428	0.746082	16
Ne	Mp-DC+Dendritic cells	51	aMb2 complex_C3	0.511	0.26698	16
Ne	Mp-DC+Dendritic cells	137	ANXA1_FPR3	1.011	0.528213	16
Ne	Ne	51	aMb2 complex_C3	0.598	0.312435	16
Ne	Ne	105	CCL18_CCR1	0.904	0.472309	16
Ne	Ne	131	CCL5_CCR1	0.414	0.216301	16
Ne	Ne	135	ANXA1_FPR1	1.914	1	16
Ne	Ne	137	ANXA1_FPR3	1.877	0.980669	16
Ne	Peri / St	51	aMb2 complex_C3	0.906	0.473354	16
Ne	S1	51	aMb2 complex_C3	0.865	0.451933	16
Ne	S3	51	aMb2 complex_C3	0.783	0.409091	16
Peri / St	Prolif cells	58	CD74_MIF	2.027	0.919274	16
Peri / St	Ly	24	aVb6 complex_TGFB1	0.721	0.326984	16
Peri / St	Ly	58	CD74_MIF	2.205	1	16
Peri / St	Mp-DC+Dendritic cells	58	CD74_MIF	1.575	0.714286	16
Peri / St	Ne	131	CCL5_CCR1	0.66	0.29932	16
Peri / St	Ne	150	CXCL6_CXCR2	0.546	0.247619	16
Peri / St	Peri / St	58	CD74_MIF	1.593	0.722449	16
Peri / St	S1	58	CD74_MIF	1.901	0.862132	16
Peri / St	S3	58	CD74_MIF	1.936	0.878005	16
S1	Prolif cells	25	SPP1_CD44	2.919	0.970412	16
S1	Prolif cells	58	CD74_MIF	2.024	0.672872	16
S1	Endo	26	GRN_TNFRSF1A	0.397	0.131981	16
S1	Ly	58	CD74_MIF	2.203	0.73238	16
S1	Mp-DC+Dendritic cells	5	JAM3_aMb2 complex	0.274	0.0910904	16
S1	Mp-DC+Dendritic cells	25	SPP1_CD44	2.92	0.970745	16
S1	Mp-DC+Dendritic cells	58	CD74_MIF	1.572	0.522606	16
S1	Ne	5	JAM3_aMb2 complex	0.49	0.162899	16
S1	Ne	25	SPP1_CD44	3.008	1	16
S1	Ne	131	CCL5_CCR1	0.534	0.177527	16
S1	Peri / St	14	GAS6_AXL	0.246	0.0817819	16
S1	Peri / St	58	CD74_MIF	1.59	0.52859	16
S1	S1	58	CD74_MIF	1.899	0.631316	16
S1	S3	26	GRN_TNFRSF1A	0.377	0.125332	16
S1	S3	58	CD74_MIF	1.934	0.642952	16
S3	Prolif cells	58	CD74_MIF	1.817	0.654068	16
S3	Endo	26	GRN_TNFRSF1A	0.379	0.136429	16
S3	Ne	131	CCL5_CCR1	0.587	0.211303	16
S3	S1	58	CD74_MIF	1.692	0.609071	16
S3	S3	26	GRN_TNFRSF1A	0.36	0.12959	16
S3	S3	58	CD74_MIF	1.727	0.62167	16
Prolif cells	Prolif cells	3	FZD1_WNT5A	0.29	0.269517	27
Prolif cells	Prolif cells	16	HBEGF_EGFR	0.597	0.554833	27
Prolif cells	Prolif cells	32	NRG1_EGFR	0.582	0.540892	27
Prolif cells	Prolif cells	34	CXCL12_DPP4	0.59	0.548327	27
Prolif cells	Prolif cells	56	RIPK1_TNFSF10	0.307	0.285316	27
Prolif cells	Prolif cells	69	F11R_BDNF	0.292	0.271375	27
Prolif cells	Prolif cells	84	NRP1_VEGFB	0.452	0.420074	27
Prolif cells	Prolif cells	88	WNT5A_FZD5	0.29	0.269517	27
Prolif cells	Prolif cells	172	BTC_EGFR	0.452	0.420074	27
Prolif cells	Endo	17	EGFR_TGFB1	0.742	0.689591	27
Prolif cells	Endo	24	aVb6 complex_TGFB1	0.979	0.909851	27
Prolif cells	Endo	56	RIPK1_TNFSF10	0.554	0.51487	27
Prolif cells	Endo	170	ACVR_1B2A receptor_INHBB	0.222	0.20632	27
Prolif cells	Ly	5	JAM3_aMb2 complex	0.504	0.468401	27
Prolif cells	Ly	17	EGFR_TGFB1	0.653	0.606877	27
Prolif cells	Ly	18	HBEGF_CD44	0.823	0.76487	27
Prolif cells	Ly	24	aVb6 complex_TGFB1	0.891	0.828067	27
Prolif cells	Ly	27	CXCL12_CXCR4	0.312	0.289963	27
Prolif cells	Ly	31	CXCL12_CXCR3	0.292	0.271375	27
Prolif cells	Ly	42	EFNA1_EPHA4	0.303	0.281599	27
Prolif cells	Ly	56	RIPK1_TNFSF10	0.569	0.52881	27
Prolif cells	Ly	76	CX3CL1_CX3CR1	0.253	0.23513	27
Prolif cells	Ly	139	LIFR_OSM	0.452	0.420074	27
Prolif cells	Mp-DC+Dendritic cells	5	JAM3_aMb2 complex	0.769	0.714684	27
Prolif cells	Mp-DC+Dendritic cells	15	aVb1 complex_FN1	0.322	0.299257	27
Prolif cells	Mp-DC+Dendritic cells	17	EGFR_TGFB1	0.839	0.77974	27
Prolif cells	Mp-DC+Dendritic cells	18	HBEGF_CD44	0.873	0.811338	27
Prolif cells	Mp-DC+Dendritic cells	24	aVb6 complex_TGFB1	1.076	1	27
Prolif cells	Mp-DC+Dendritic cells	76	CX3CL1_CX3CR1	0.234	0.217472	27
Prolif cells	Mp-DC+Dendritic cells	143	C3_C3AR1	0.391	0.363383	27
Prolif cells	Ne	5	JAM3_aMb2 complex	0.639	0.593866	27
Prolif cells	Ne	17	EGFR_TGFB1	0.4	0.371747	27
Prolif cells	Ne	18	HBEGF_CD44	0.864	0.802974	27
Prolif cells	Ne	24	aVb6 complex_TGFB1	0.637	0.592007	27
Prolif cells	Ne	139	LIFR_OSM	0.707	0.657063	27
Prolif cells	Peri / St	14	GAS6_AXL	0.558	0.518587	27
Prolif cells	Peri / St	16	HBEGF_EGFR	0.361	0.335502	27
Prolif cells	Peri / St	24	aVb6 complex_TGFB1	0.629	0.584572	27
Prolif cells	Peri / St	30	NRG1_ERBB3	0.378	0.351301	27
Prolif cells	Peri / St	32	NRG1_EGFR	0.347	0.322491	27
Prolif cells	Peri / St	35	CXCL12_ACKR3	0.638	0.592937	27
Prolif cells	Peri / St	43	EFNA1_EPHA2	0.203	0.188662	27
Prolif cells	Peri / St	167	BDNF_SORT1	0.247	0.229554	27
Prolif cells	Peri / St	171	BTC_ERBB3	0.247	0.229554	27
Prolif cells	S1	16	HBEGF_EGFR	0.394	0.366171	27
Prolif cells	S1	30	NRG1_ERBB3	0.366	0.340149	27
Prolif cells	S1	32	NRG1_EGFR	0.38	0.35316	27
Prolif cells	S1	171	BTC_ERBB3	0.235	0.218401	27
Prolif cells	S1	172	BTC_EGFR	0.249	0.231413	27
Prolif cells	S3	16	HBEGF_EGFR	0.399	0.370818	27
Prolif cells	S3	30	NRG1_ERBB3	0.359	0.333643	27
Prolif cells	S3	32	NRG1_EGFR	0.385	0.357807	27
Prolif cells	S3	172	BTC_EGFR	0.254	0.236059	27
Endo	Prolif cells	44	NRP1_VEGFA	0.885	0.428987	27
Endo	Prolif cells	69	F11R_BDNF	0.91	0.441105	27
Endo	Prolif cells	73	TNFSF12_TNFRSF12A	0.426	0.206495	27
Endo	Prolif cells	74	JAM2_JAM3	0.455	0.220553	27
Endo	Prolif cells	77	FLT1 complex_VEGFB	0.991	0.480368	27
Endo	Prolif cells	78	KDR_VEGFA	0.962	0.466311	27
Endo	Prolif cells	80	FLT1 complex_VEGFA	0.975	0.472613	27
Endo	Prolif cells	81	NRP2_SEMA3C	0.669	0.324285	27
Endo	Prolif cells	82	FLT1_VEGFB	0.991	0.480368	27
Endo	Prolif cells	83	FLT1_VEGFA	0.975	0.472613	27
Endo	Prolif cells	84	NRP1_VEGFB	0.9	0.436258	27
Endo	Prolif cells	149	CXCL10_DPP4	0.489	0.237033	27
Endo	Endo	23	a6b1 complex_LAMC1	0.223	0.108095	27
Endo	Endo	24	aVb6 complex_TGFB1	0.527	0.255453	27
Endo	Endo	26	GRN_TNFRSF1A	0.948	0.459525	27
Endo	Endo	42	EFNA1_EPHA4	0.377	0.182744	27
Endo	Endo	44	NRP1_VEGFA	0.648	0.314106	27
Endo	Endo	45	TGFbeta receptor1_TGFB1	0.818	0.39651	27
Endo	Endo	74	JAM2_JAM3	0.453	0.219583	27
Endo	Endo	75	NRP2_SEMA3F	0.445	0.215705	27
Endo	Endo	78	KDR_VEGFA	0.725	0.35143	27
Endo	Endo	80	FLT1 complex_VEGFA	0.739	0.358216	27
Endo	Endo	83	FLT1_VEGFA	0.739	0.358216	27
Endo	Ly	5	JAM3_aMb2 complex	0.502	0.243335	27
Endo	Ly	7	IL15_IL15RA	0.223	0.108095	27
Endo	Ly	13	GAS6_MERTK	0.565	0.273873	27
Endo	Ly	20	GRN_TNFRSF1B	0.763	0.36985	27
Endo	Ly	24	aVb6 complex_TGFB1	0.439	0.212797	27
Endo	Ly	26	GRN_TNFRSF1A	0.891	0.431895	27
Endo	Ly	42	EFNA1_EPHA4	0.455	0.220553	27
Endo	Ly	45	TGFbeta receptor1_TGFB1	0.729	0.353369	27
Endo	Ly	57	PLAUR_a4b1 complex	0.31	0.150267	27
Endo	Ly	68	CSF1_CSF1R	0.682	0.330587	27
Endo	Ly	74	JAM2_JAM3	0.475	0.230247	27
Endo	Ly	75	NRP2_SEMA3F	0.348	0.168686	27
Endo	Ly	76	CX3CL1_CX3CR1	0.24	0.116335	27
Endo	Ly	135	ANXA1_FPR1	0.821	0.397964	27
Endo	Ly	136	FAS_TNF	0.55	0.266602	27
Endo	Ly	137	ANXA1_FPR3	0.901	0.436743	27
Endo	Ly	139	LIFR_OSM	0.411	0.199224	27
Endo	Ly	173	CXCL10_CXCR3	0.191	0.0925836	27
Endo	Ly	174	KITLG_KIT	0.151	0.0731944	27
Endo	Mp-DC+Dendritic cells	5	JAM3_aMb2 complex	0.767	0.371789	27
Endo	Mp-DC+Dendritic cells	7	IL15_IL15RA	0.213	0.103248	27
Endo	Mp-DC+Dendritic cells	15	aVb1 complex_FN1	0.444	0.215221	27
Endo	Mp-DC+Dendritic cells	20	GRN_TNFRSF1B	0.75	0.363548	27
Endo	Mp-DC+Dendritic cells	24	aVb6 complex_TGFB1	0.624	0.302472	27
Endo	Mp-DC+Dendritic cells	26	GRN_TNFRSF1A	0.711	0.344644	27
Endo	Mp-DC+Dendritic cells	40	aVb5 complex_FN1	0.243	0.11779	27
Endo	Mp-DC+Dendritic cells	45	TGFbeta receptor1_TGFB1	0.915	0.443529	27
Endo	Mp-DC+Dendritic cells	57	PLAUR_a4b1 complex	0.574	0.278236	27
Endo	Mp-DC+Dendritic cells	67	a5b1 complex_FN1	0.271	0.131362	27
Endo	Mp-DC+Dendritic cells	68	CSF1_CSF1R	0.899	0.435773	27
Endo	Mp-DC+Dendritic cells	71	a3b1 complex_FN1	0.235	0.113912	27
Endo	Mp-DC+Dendritic cells	76	CX3CL1_CX3CR1	0.221	0.107126	27
Endo	Mp-DC+Dendritic cells	135	ANXA1_FPR1	0.298	0.14445	27
Endo	Mp-DC+Dendritic cells	136	FAS_TNF	0.418	0.202618	27
Endo	Mp-DC+Dendritic cells	137	ANXA1_FPR3	0.518	0.251091	27
Endo	Mp-DC+Dendritic cells	138	CCL2_CCR2	0.36	0.174503	27
Endo	Mp-DC+Dendritic cells	139	LIFR_OSM	0.161	0.0780417	27
Endo	Mp-DC+Dendritic cells	149	CXCL10_DPP4	0.174	0.0843432	27
Endo	Ne	5	JAM3_aMb2 complex	0.638	0.309258	27
Endo	Ne	20	GRN_TNFRSF1B	0.689	0.33398	27
Endo	Ne	26	GRN_TNFRSF1A	0.657	0.318468	27
Endo	Ne	45	TGFbeta receptor1_TGFB1	0.475	0.230247	27
Endo	Ne	68	CSF1_CSF1R	0.46	0.222976	27
Endo	Ne	135	ANXA1_FPR1	0.995	0.482307	27
Endo	Ne	136	FAS_TNF	0.543	0.263209	27
Endo	Ne	137	ANXA1_FPR3	1.315	0.637421	27
Endo	Ne	139	LIFR_OSM	0.667	0.323316	27
Endo	Peri / St	7	IL15_IL15RA	0.198	0.0959767	27
Endo	Peri / St	13	GAS6_MERTK	0.561	0.271934	27
Endo	Peri / St	14	GAS6_AXL	0.603	0.292293	27
Endo	Peri / St	15	aVb1 complex_FN1	0.333	0.161415	27
Endo	Peri / St	26	GRN_TNFRSF1A	0.71	0.344159	27
Endo	Peri / St	40	aVb5 complex_FN1	0.132	0.0639845	27
Endo	Peri / St	43	EFNA1_EPHA2	0.355	0.172079	27
Endo	Peri / St	44	NRP1_VEGFA	0.705	0.341735	27
Endo	Peri / St	45	TGFbeta receptor1_TGFB1	0.467	0.226369	27
Endo	Peri / St	64	PDGFB_PDGFRB	0.299	0.144935	27
Endo	Peri / St	67	a5b1 complex_FN1	0.159	0.0770722	27
Endo	Peri / St	68	CSF1_CSF1R	0.497	0.240911	27
Endo	Peri / St	70	PROS1_AXL	0.268	0.129908	27
Endo	Peri / St	71	a3b1 complex_FN1	0.124	0.0601066	27
Endo	Peri / St	73	TNFSF12_TNFRSF12A	0.282	0.136694	27
Endo	Peri / St	77	FLT1 complex_VEGFB	0.821	0.397964	27
Endo	Peri / St	78	KDR_VEGFA	0.782	0.37906	27
Endo	Peri / St	80	FLT1 complex_VEGFA	0.796	0.385846	27
Endo	Peri / St	81	NRP2_SEMA3C	0.296	0.14348	27
Endo	Peri / St	82	FLT1_VEGFB	0.821	0.397964	27
Endo	Peri / St	83	FLT1_VEGFA	0.796	0.385846	27
Endo	Peri / St	84	NRP1_VEGFB	0.73	0.353854	27
Endo	Peri / St	141	TGFbeta receptor1_TGFB2	0.422	0.204556	27
Endo	Peri / St	149	CXCL10_DPP4	0.195	0.0945225	27
Endo	Peri / St	158	ADORA2A_NAMPT	0.642	0.311197	27
Endo	S1	44	NRP1_VEGFA	0.829	0.401842	27
Endo	S1	58	CD74_MIF	2.044	0.99079	27
Endo	S1	73	TNFSF12_TNFRSF12A	0.192	0.0930683	27
Endo	S1	74	JAM2_JAM3	0.437	0.211827	27
Endo	S1	77	FLT1 complex_VEGFB	0.801	0.38827	27
Endo	S1	78	KDR_VEGFA	0.906	0.439166	27
Endo	S1	79	NRP2_VEGFA	0.414	0.200679	27
Endo	S1	80	FLT1 complex_VEGFA	0.92	0.445952	27
Endo	S1	81	NRP2_SEMA3C	0.281	0.136209	27
Endo	S1	82	FLT1_VEGFB	0.801	0.38827	27
Endo	S1	83	FLT1_VEGFA	0.92	0.445952	27
Endo	S1	84	NRP1_VEGFB	0.71	0.344159	27
Endo	S1	149	CXCL10_DPP4	0.211	0.102278	27
Endo	S3	7	IL15_IL15RA	0.191	0.0925836	27
Endo	S3	13	GAS6_MERTK	0.589	0.285507	27
Endo	S3	26	GRN_TNFRSF1A	0.528	0.255938	27
Endo	S3	44	NRP1_VEGFA	0.868	0.420746	27
Endo	S3	58	CD74_MIF	1.937	0.938924	27
Endo	S3	69	F11R_BDNF	0.841	0.407659	27
Endo	S3	73	TNFSF12_TNFRSF12A	0.23	0.111488	27
Endo	S3	77	FLT1 complex_VEGFB	0.765	0.370819	27
Endo	S3	78	KDR_VEGFA	0.945	0.458071	27
Endo	S3	79	NRP2_VEGFA	0.453	0.219583	27
Endo	S3	80	FLT1 complex_VEGFA	0.959	0.464857	27
Endo	S3	81	NRP2_SEMA3C	0.401	0.194377	27
Endo	S3	82	FLT1_VEGFB	0.765	0.370819	27
Endo	S3	83	FLT1_VEGFA	0.959	0.464857	27
Endo	S3	84	NRP1_VEGFB	0.675	0.327193	27
Endo	S3	149	CXCL10_DPP4	0.227	0.110034	27
Endo	S3	158	ADORA2A_NAMPT	0.452	0.219098	27
Ly	Prolif cells	44	NRP1_VEGFA	0.956	0.395205	27
Ly	Prolif cells	47	ADRB2_VEGFB	0.651	0.269119	27
Ly	Prolif cells	51	aMb2 complex_C3	0.634	0.262092	27
Ly	Prolif cells	58	CD74_MIF	2.247	0.928896	27
Ly	Prolif cells	77	FLT1 complex_VEGFB	0.746	0.308392	27
Ly	Prolif cells	78	KDR_VEGFA	1.021	0.422075	27
Ly	Prolif cells	79	NRP2_VEGFA	0.441	0.182307	27
Ly	Prolif cells	80	FLT1 complex_VEGFA	0.731	0.302191	27
Ly	Prolif cells	81	NRP2_SEMA3C	0.641	0.264986	27
Ly	Prolif cells	82	FLT1_VEGFB	0.746	0.308392	27
Ly	Prolif cells	83	FLT1_VEGFA	0.731	0.302191	27
Ly	Prolif cells	84	NRP1_VEGFB	0.972	0.401819	27
Ly	Prolif cells	134	TNF_RIPK1	0.345	0.142621	27
Ly	Prolif cells	148	IL1 receptor inhibitor_IL1B	0.513	0.212071	27
Ly	Prolif cells	154	CCL22_DPP4	0.436	0.18024	27
Ly	Endo	26	GRN_TNFRSF1A	0.897	0.370814	27
Ly	Endo	42	EFNA1_EPHA4	0.288	0.119057	27
Ly	Endo	44	NRP1_VEGFA	0.72	0.297644	27
Ly	Endo	45	TGFbeta receptor1_TGFB1	0.659	0.272427	27
Ly	Endo	51	aMb2 complex_C3	0.432	0.178586	27
Ly	Endo	56	RIPK1_TNFSF10	0.48	0.198429	27
Ly	Endo	63	RIF1_NOTCH1	0.176	0.0727573	27
Ly	Endo	75	NRP2_SEMA3F	0.417	0.172385	27
Ly	Endo	78	KDR_VEGFA	0.785	0.324514	27
Ly	Endo	80	FLT1 complex_VEGFA	0.494	0.204217	27
Ly	Endo	83	FLT1_VEGFA	0.494	0.204217	27
Ly	Endo	104	TGFBR3_TGFB1	0.531	0.219512	27
Ly	Endo	132	TNF_LTBR	0.323	0.133526	27
Ly	Endo	158	ADORA2A_NAMPT	0.487	0.201323	27
Ly	Endo	163	TNF_TNFRSF1A	0.67	0.276974	27
Ly	Endo	178	SORT1_GRN	0.516	0.213311	27
Ly	Ly	5	JAM3_aMb2 complex	0.524	0.216618	27
Ly	Ly	20	GRN_TNFRSF1B	0.713	0.29475	27
Ly	Ly	26	GRN_TNFRSF1A	0.84	0.347251	27
Ly	Ly	42	EFNA1_EPHA4	0.366	0.151302	27
Ly	Ly	45	TGFbeta receptor1_TGFB1	0.57	0.235635	27
Ly	Ly	48	aMb2 complex_F10	0.634	0.262092	27
Ly	Ly	51	aMb2 complex_C3	0.742	0.306738	27
Ly	Ly	56	RIPK1_TNFSF10	0.496	0.205043	27
Ly	Ly	57	PLAUR_a4b1 complex	0.511	0.211244	27
Ly	Ly	63	RIF1_NOTCH1	0.389	0.16081	27
Ly	Ly	68	CSF1_CSF1R	0.61	0.25217	27
Ly	Ly	75	NRP2_SEMA3F	0.32	0.132286	27
Ly	Ly	104	TGFBR3_TGFB1	0.443	0.183134	27
Ly	Ly	105	CCL18_CCR1	0.686	0.283588	27
Ly	Ly	131	CCL5_CCR1	0.659	0.272427	27
Ly	Ly	132	TNF_LTBR	0.28	0.11575	27
Ly	Ly	133	TNF_TNFRSF1B	0.485	0.200496	27
Ly	Ly	134	TNF_RIPK1	0.271	0.11203	27
Ly	Ly	135	ANXA1_FPR1	1.266	0.523357	27
Ly	Ly	136	FAS_TNF	0.724	0.299297	27
Ly	Ly	137	ANXA1_FPR3	1.346	0.556428	27
Ly	Ly	146	IL1 receptor inhibitor_IL1A	0.461	0.190575	27
Ly	Ly	147	IL1 receptor inhibitor_IL1RN	0.99	0.40926	27
Ly	Ly	148	IL1 receptor inhibitor_IL1B	1.37	0.56635	27
Ly	Ly	163	TNF_TNFRSF1A	0.613	0.25341	27
Ly	Ly	174	KITLG_KIT	0.204	0.0843324	27
Ly	Ly	179	FLT3LG_FLT3	0.124	0.0512609	27
Ly	Mp-DC+Dendritic cells	5	JAM3_aMb2 complex	0.788	0.325754	27
Ly	Mp-DC+Dendritic cells	15	aVb1 complex_FN1	0.573	0.236875	27
Ly	Mp-DC+Dendritic cells	20	GRN_TNFRSF1B	0.699	0.288962	27
Ly	Mp-DC+Dendritic cells	26	GRN_TNFRSF1A	0.661	0.273253	27
Ly	Mp-DC+Dendritic cells	40	aVb5 complex_FN1	0.259	0.107069	27
Ly	Mp-DC+Dendritic cells	45	TGFbeta receptor1_TGFB1	0.756	0.312526	27
Ly	Mp-DC+Dendritic cells	48	aMb2 complex_F10	0.592	0.244729	27
Ly	Mp-DC+Dendritic cells	51	aMb2 complex_C3	0.495	0.20463	27
Ly	Mp-DC+Dendritic cells	53	a4b7 complex_FN1	0.27	0.111616	27
Ly	Mp-DC+Dendritic cells	54	a4b1 complex_FN1	0.27	0.111616	27
Ly	Mp-DC+Dendritic cells	55	CD52_SIGLEC10	1.73	0.715172	27
Ly	Mp-DC+Dendritic cells	57	PLAUR_a4b1 complex	0.775	0.32038	27
Ly	Mp-DC+Dendritic cells	67	a5b1 complex_FN1	0.336	0.1389	27
Ly	Mp-DC+Dendritic cells	68	CSF1_CSF1R	0.827	0.341877	27
Ly	Mp-DC+Dendritic cells	104	TGFBR3_TGFB1	0.628	0.259611	27
Ly	Mp-DC+Dendritic cells	105	CCL18_CCR1	0.673	0.278214	27
Ly	Mp-DC+Dendritic cells	131	CCL5_CCR1	0.646	0.267053	27
Ly	Mp-DC+Dendritic cells	132	TNF_LTBR	0.316	0.130632	27
Ly	Mp-DC+Dendritic cells	133	TNF_TNFRSF1B	0.472	0.195122	27
Ly	Mp-DC+Dendritic cells	134	TNF_RIPK1	0.27	0.111616	27
Ly	Mp-DC+Dendritic cells	135	ANXA1_FPR1	0.743	0.307152	27
Ly	Mp-DC+Dendritic cells	136	FAS_TNF	0.592	0.244729	27
Ly	Mp-DC+Dendritic cells	137	ANXA1_FPR3	0.963	0.398098	27
Ly	Mp-DC+Dendritic cells	143	C3_C3AR1	0.498	0.20587	27
Ly	Mp-DC+Dendritic cells	147	IL1 receptor inhibitor_IL1RN	0.578	0.238942	27
Ly	Mp-DC+Dendritic cells	148	IL1 receptor inhibitor_IL1B	0.922	0.381149	27
Ly	Mp-DC+Dendritic cells	152	CCL5_CCR5	0.617	0.255064	27
Ly	Mp-DC+Dendritic cells	154	CCL22_DPP4	0.121	0.0500207	27
Ly	Mp-DC+Dendritic cells	163	TNF_TNFRSF1A	0.434	0.179413	27
Ly	Mp-DC+Dendritic cells	178	SORT1_GRN	0.671	0.277387	27
Ly	Ne	5	JAM3_aMb2 complex	0.659	0.272427	27
Ly	Ne	20	GRN_TNFRSF1B	0.639	0.264159	27
Ly	Ne	26	GRN_TNFRSF1A	0.607	0.25093	27
Ly	Ne	45	TGFbeta receptor1_TGFB1	0.316	0.130632	27
[truncated: 2,117 more rows]
