# Supplementary material for: The orchestrated cellular and molecular responses of the kidney to endotoxin define a precise sepsis timeline
Source: eLife. 2021 Jan 15;10:e62270. doi: 10.7554/eLife.62270 (PMC7810465; doi:10.7554/eLife.62270)
Supplement: Supplementary file 3. [file elife-62270-supp3.xlsx]

## Sheet: Scenic Regulons (by cell type)
Genes that are upregulated at 16 hours after LPS treatment in representative cell types
Macrophage/DC (Cluster 10)	Endothelial (Cluster 9)	S3 (Cluster 8)	S1 (Cluster 0)
E2f1	Hlf	Elf1	Hoxb7
Maz	Hnf1b	Etv6	Sp3
Srebf1	Ets2	Hes1	Zbtb33
Creb3	Pparg	Nfil3	Phf8
Sp3	Ppargc1a	Maff	Gabpb1
Stat5b	Cux1	Rela	Hdac2
Esrra	Ctcf	Stat1	Smarca4
Atf1	Nr1h4	Stat3	Ubtf
E2f4	Hnf4a	Irf9	Srebf2
Thap1	Trp53	Cebpb	Zmiz1
Hcfc1	Bclaf1	Stat2	Atf1
Sp1	Ubtf	Bcl3	Erf
Mxd4	Rad21	Irf1	Ctcf
Thap11	Smarca4	Klf11	Arntl
Irf3	Usf1	Elf3	Ep300
Zxdb	Gata2	Hoxd9	Nr2c2
Klf3	Bmyc	Hsf1	Atf6
Ahr	E2f4	Rfx5	Mxi1
Rxrb	Esrra	Erf	Sp1
Kdm5b	Thap11	Tcf12	Nfyb
Atf6	Maz	Rara	Usf1
Setdb1	Nr2f6	Zfp704	Elk4
Ybx1	Tcf3	E2f4	Elf3
Fos	Nr2f2	Cpsf4	Chd1
Cbfb	Rarb	Srebf2	Ets2
Nfil3	Dbp	Etv3	Bhlhe41
Atf4	Yy1	Brf1	Creb1
Rxra	Mxi1	Srf	Etv3
Srebf2	Gabpa	Ezh2	Smc3
Fosb	Hdac2	Max	Zc3h11a
Sin3a	Zmiz1	Trp53	Arnt
Clock	Etv1	Srebf1	Etv5
Pbx3	Erf	Nfyb	Hoxb2
Rarg	Sp1	Zfp64	Rbbp5
Hdac2	Sin3a	Lhx1	Taf7
Smarca4	Kdm5a	Zfp110	E2f4
Xrcc4	Elk4	Kdm5b	Brf1
Yy1	Creb1	Ep300	Sin3a
Rad21	Chd1	Ctcf	Kdm5b
Pole3	Tbx3	Zc3h11a	Srebf1
Gtf2f1	Srebf2	Elf2	Elf2
Zfp110	Rb1	Phf8	Zfp110
Max	Atf2	Sin3a	Gabpa
Elf1	Hcfc1	Zfp369	Zfx
Relb	Ep300	Nfya	Max
Rela	Taf1	Taf1	Smad5
Nfyb	Zfp329	Yy1	Yy1
Creb1	Foxo1	Rest	Kdm5a
Got1	Max	Maz	Taf1
Taf7	Gtf2f1	Rreb1	Rcor1
Ep300	Sap30	Smarcc2	Hoxd9
Egr1	Smad1	Zfx	Hes6
Pou2f1	Mlxipl	Zfp523	Maz
Gabpa	Hoxb2	Etv5	Atf6b
Trim28	Nrf1	Setdb1	Rest
Etv5	Rest	Rfx1	Srf
Rbbp5	Mecp2	Tbp	Hcfc1
Sp2	Tef	Zfp143	Zfp523
Ezh2	Hoxd8	Nrf1	Gtf2f1
Phf8	Zbtb7b	Rb1	Setdb1
Elf2	Rxrb	Thap11	Xrcc4
Nrf1	Kdm5b	Hoxb2	Nr1h4
Ubtf	Pbx3	Nr1h3	Irf8
Ctcf	Zfp110	Hdac6	Sox9
Bclaf1	Srebf1	Irf7	Ddit3
Erf	Xrcc4	Gmeb1	Irf7
Elk4	Patz1	Ets2	Sox4
Brf1	Nr2c2	Bmyc	Zbtb7a
Nr2c2	Sp3	Myc
Myc	Creb3l2	Irf8
Srf	Zbtb7a	Xrcc4
Zfp143	Atf1	Gtf2f1
Taf1	Ppard	Ppara
Myef2	Nfyc	Rxrb
Mxi1	Hes6	Elk4
Klf10	Tbx2	Rbbp5
Gfi1b	Usf2	Glis2
E2f2		Htatip2
Bhlhe40		Emx1
Atf2		Usf2
Nfia
Elk3
