# Supplementary material for: The orchestrated cellular and molecular responses of the kidney to endotoxin define a precise sepsis timeline
Source: eLife. 2021 Jan 15;10:e62270. doi: 10.7554/eLife.62270 (PMC7810465; doi:10.7554/eLife.62270)
Supplement: Supplementary file 4. [file elife-62270-supp4.xlsx]

## Sheet: 0hr_pseudobulk
	logFC	logCPM	F	PValue	FDR
Hbb-bs	3.59985	9.65636	5923.28	0	0
Cebpb	-2.80537	10.0153	2030.11	0	0
Hba-a1	2.77459	9.47611	3977.92	0	0
Hba-a2	2.72918	9.41422	4365.27	0	0
Ass1	1.93465	10.5594	3382.83	0	0
Miox	1.88178	10.7659	3234.69	0	0
Hbb-bt	1.7844	9.27564	3497.01	0	0
Inmt	1.59926	9.76729	1926.21	0	0
mt-Nd3	1.44544	11.1198	2388.31	0	0
Sord	1.33628	10.0831	1791.35	0	0
Keg1	1.32676	10.2076	1575.47	0	0
Pcbd1	1.30493	9.87087	1796.98	0	0
Gabarapl1	1.29424	9.99722	1612.19	0	0
Akr1c21	1.33323	10.6889	1518.63	1.75699091383167e-315	3.51373082896065e-312
Eef1a1	0.888362	11.4273	1488.05	0	3.27518e-306
Pah	1.32297	9.88614	1469.81	6.75544e-306	1.18212e-302
S100a8	-4.66257	10.9912	1438.42	1.02107e-299	1.68164e-296
Clec2h	1.41659	9.2925	2267.09	1.58225e-295	2.4611e-292
Slc34a1	1.32198	10.993	1358.6	6.01672e-284	8.86611e-281
Gatm	1.52769	10.3904	1347.27	1.05848e-281	1.48176e-278
Irf7	-2.13956	9.55964	1465.79	1.04621e-278	1.39484e-275
Gapdh	0.958642	10.6925	1323.89	4.62251e-277	5.88278e-274
Gm5424	1.26218	9.37594	1410.91	2.44597e-276	2.97749e-273
Igfbp7	1.07223	10.5686	1259.71	2.71278e-264	3.16468e-261
Cela1	1.24938	9.81426	1251.1	1.41661e-262	1.58649e-259
Irgm1	-1.82811	9.67802	1224.96	2.34468e-257	2.52486e-254
Eef2	0.954645	10.2755	1218.85	3.9072e-256	4.05162e-253
S100a9	-3.92784	10.4578	1196.65	1.0803e-251	1.08022e-248
Dnajc12	1.18141	9.68498	1184.15	3.44572e-249	3.32666e-246
Slc25a3	0.939446	10.2647	1175.94	1.52581e-247	1.42398e-244
Atp5b	0.832316	10.7724	1158.94	3.93117e-244	3.55048e-241
mt-Nd2	0.965914	12.662	1151.71	1.11216e-242	9.73069e-240
Hao2	1.13823	9.50447	1094.69	3.30694e-231	2.80568e-228
Snhg11	1.30047	9.44515	1093.46	5.84194e-231	4.81067e-228
mt-Nd4	0.912746	13.6988	1087.7	8.45834e-230	6.76619e-227
Cxcl2	-2.16966	9.52354	1039.88	3.87072e-220	3.01035e-217
Oxct1	1.1003	9.91538	1036.21	2.14734e-219	1.6249e-216
Lcn2	-3.43447	10.1357	1030.95	2.48646e-218	1.832e-215
Cox4i1	0.636226	11.5489	1024.09	6.09988e-217	4.37909e-214
Atp5d	0.788896	10.453	987.17	1.87365e-209	1.31146e-206
Fgg	-2.29326	9.87084	982.687	5.83245e-205	3.98286e-202
B2m	-1.34484	11.0765	961.779	2.70927e-204	1.80605e-201
Cmbl	1.01155	9.49055	945.587	5.35073e-201	3.48394e-198
Ifitm3	-2.14934	10.1497	941.561	3.53361e-200	2.2485e-197
Csrp2	0.98881	9.59615	919.024	1.38806e-195	8.6362e-193
Plac8	-2.07291	10.0219	917.534	2.79406e-195	1.70061e-192
Akr1a1	0.876981	10.916	917.391	2.98814e-195	1.78004e-192
Hsd3b2	1.09438	9.31573	1415.64	2.03321e-194	1.18595e-191
Kl	1.15487	9.86799	906.22	5.69638e-193	3.25484e-190
Cox8a	0.624529	11.6507	904.896	1.0613e-192	5.94287e-190
2010107E04Rik	0.719982	10.9419	891.599	5.5237e-190	3.0324e-187
Akr7a5	0.974082	9.81744	889.964	1.19288e-189	6.42275e-187
Rpl7a	0.856787	10.0928	889.565	1.4389e-189	7.60121e-187
Igfbp5	1.09518	9.34107	1059.74	1.76926e-189	9.17328e-187
Spp1	-1.63711	12.443	881.955	5.17614e-188	2.63494e-185
Ttc36	1.00892	10.7158	874.353	1.85859e-186	9.29227e-184
Car12	1.06359	9.47776	867.507	4.6816e-185	2.29957e-182
Fxyd2	0.789779	12.9102	864.541	1.8952e-184	9.14857e-182
Rplp1	0.706379	10.9551	861.482	8.01731e-184	3.80456e-181
Cxcl1	-1.90276	9.65004	852.051	6.859e-182	3.20064e-179
Cndp2	1.13369	10.0599	850.038	1.7735e-181	8.14006e-179
Rps2	0.741279	10.9639	841.358	1.06774e-179	4.82171e-177
Ifit1	-1.81539	9.78675	1049.73	2.91252e-179	1.29436e-176
Aes	0.935503	9.81439	835.311	1.85709e-178	8.12418e-176
AW112010	-1.87232	9.91234	826.764	1.05448e-176	4.54207e-174
Snx29	1.00221	9.38423	930.611	2.72623e-174	1.1565e-171
Bst2	-1.50853	9.52652	809.355	3.97409e-173	1.6607e-170
Neu1	0.97167	9.66599	805.519	2.44169e-172	1.00533e-169
RP24-64C6.3	0.944099	9.86906	798.25	7.62903e-171	3.09562e-168
Car3	1.07516	9.30144	1019.25	9.65836e-171	3.86307e-168
Pvalb	1.13556	9.29188	1015.32	2.17673e-169	8.58366e-167
Pcyt2	0.946742	9.46349	824.919	9.0081e-169	3.5029e-166
C3	-1.55115	9.36965	1008.83	6.20162e-167	2.37853e-164
Pdzk1ip1	0.875407	10.4955	772.537	1.50096e-165	5.67889e-163
mt-Co2	0.793938	13.8332	763.577	1.05493e-163	3.93812e-161
Mdh1	0.811493	10.2447	755.319	5.32786e-162	1.96275e-159
Cml1	0.941127	9.93015	748.467	1.38226e-160	5.02605e-158
Isoc2a	0.965694	9.32758	1127.2	2.66205e-160	9.5554e-158
Cox6c	0.573219	11.8388	745.857	4.77819e-160	1.69342e-157
Cyp4b1	1.08007	10.2496	742.645	2.20038e-159	7.70077e-157
Rpl28	0.682507	10.6712	738.808	1.36421e-158	4.71545e-156
Atp5h	0.729655	10.4553	736.912	3.36211e-158	1.14795e-155
Slc22a28	0.910571	9.50322	731.126	5.27315e-157	1.77877e-154
Glyat	0.949742	9.96152	729.52	1.1325e-156	3.77473e-154
Atp5c1	0.786795	10.1225	729.169	1.33804e-156	4.40733e-154
Isg15	-1.6624	9.57366	727.79	2.57923e-156	8.39689e-154
Atp5e	0.603782	11.1259	724.535	1.21442e-155	3.9082e-153
Fga	-1.95281	9.73729	776.06	1.4465e-155	4.60217e-153
Retnlg	-2.04135	9.50117	722.754	2.83551e-155	8.92007e-153
Atp5a1	0.738433	10.4404	722.116	3.84351e-155	1.19567e-152
Rpl10	0.725689	10.9774	721.33	5.58808e-155	1.71929e-152
Rps10	0.754089	10.2975	718.252	2.42027e-154	7.36553e-152
Wfdc17	-2.71384	9.79277	715.623	8.46417e-154	2.54817e-151
H2-K1	-1.29388	10.038	713.83	1.98898e-153	5.92419e-151
Maf	1.00446	10.0271	712.05	4.64436e-153	1.36877e-150
Dcxr	0.90232	9.71537	711.767	5.31515e-153	1.55014e-150
Pipox	0.920476	9.41988	732.516	8.78077e-153	2.53447e-150
Tmem174	0.827127	9.55068	699.099	2.22948e-150	6.36948e-148
Rps21	0.688875	10.4084	698	3.76511e-150	1.0648e-147
Chchd10	0.669288	11.1108	696.986	6.10703e-150	1.70985e-147
Chd3	0.885074	9.48637	692.988	4.11254e-149	1.14003e-146
Ptms	0.834261	9.82709	691.073	1.02561e-148	2.81519e-146
Fam151a	1.05557	9.2793	1269.17	1.28544e-148	3.49415e-146
Rps17	0.629353	10.7755	686.561	8.83521e-148	2.37854e-145
Atp5g2	0.714758	10.2137	681.539	9.714e-147	2.59022e-144
Pecr	0.915993	9.70836	679.258	2.88756e-146	7.62698e-144
Amacr	0.860633	9.4457	677.845	5.66983e-146	1.48359e-143
Id2	0.856474	10.3777	676.97	8.61346e-146	2.23296e-143
Slc22a18	0.925374	9.53384	672.066	8.9642e-145	2.30257e-142
Car2	0.962855	9.75479	670.717	1.70824e-144	4.34794e-142
Ccl2	-1.50347	9.40184	663.946	4.34508e-143	1.09598e-140
4833439L19Rik	0.795372	10.0444	655.623	2.32682e-141	5.81664e-139
Nox4	0.959638	9.61021	655.52	2.44411e-141	6.05577e-139
Rpl8	0.668708	10.5688	648.457	7.176e-140	1.7624e-137
Uqcr11	0.587324	11.1046	647.213	1.3015e-139	3.16864e-137
Slc26a1	0.925895	9.32585	958.636	6.44948e-139	1.55666e-136
Hsp90ab1	0.776018	10.096	642.697	1.13069e-138	2.70573e-136
Tnfaip8	0.847935	9.637	638.339	9.11485e-138	2.16269e-135
Pter	0.836378	9.65656	634.799	4.96764e-137	1.16877e-134
Cox7b	0.671078	10.5655	633.642	8.64845e-137	2.01783e-134
Gas6	0.854778	9.55305	627.91	1.34845e-135	3.12015e-133
Slc7a13	0.952247	9.53282	627.469	1.66582e-135	3.82292e-133
Mgst1	-1.18031	9.97757	623.082	1.36452e-134	3.10601e-132
Rplp0	0.654322	10.9749	621.065	3.59093e-134	8.10798e-132
Cox6a1	0.568366	11.154	619.864	6.38752e-134	1.4307e-131
Vdac1	0.767901	9.8863	617.581	1.90894e-133	4.24178e-131
Slc25a4	0.854609	9.85738	614.747	7.43397e-133	1.63887e-130
Cxcl10	-1.73742	9.84845	855.452	1.80103e-132	3.93948e-130
Timp3	0.888883	10.7403	612.307	2.39747e-132	5.20344e-130
Atp5f1	0.733675	10.0671	612.242	2.4733e-132	5.32673e-130
Uqcrfs1	0.756008	10.0154	612.095	2.65397e-132	5.67221e-130
Lactb2	0.816136	9.64674	610.201	6.58394e-132	1.39649e-129
Ndrg1	0.828771	10.9413	609.244	1.04223e-131	2.194e-129
Rpl21	0.635542	10.7161	607.928	1.96045e-131	4.09616e-129
Mt2	-1.68804	10.2062	607.143	2.8582e-131	5.9277e-129
Acy3	0.929271	10.2475	606.099	4.71734e-131	9.71148e-129
Fut9	0.847393	9.97118	602.142	3.15267e-130	6.44296e-128
Uqcrc2	0.848929	9.52704	598.833	1.54516e-129	3.13488e-127
Zmynd10	0.816763	9.35781	790.233	1.12726e-128	2.27059e-126
Lpl	0.963895	9.85673	592.333	3.50884e-128	7.01718e-126
Car4	0.827267	9.45293	590.947	6.82935e-128	1.35609e-125
Sfrp1	0.986116	9.34334	587.413	3.73198e-127	7.35832e-125
Il1b	-1.25179	9.30652	750.864	1.69953e-126	3.32751e-124
Marcksl1	-1.33833	9.38637	582.727	3.55145e-126	6.90511e-124
Cox6b1	0.537281	11.1988	582.513	3.93617e-126	7.60034e-124
Ces1f	0.880185	9.60293	578.833	2.31114e-125	4.432e-123
Gbp2	-1.79735	9.65895	862.576	1.6983e-124	3.23462e-122
Chchd2	0.54617	11.2558	573.92	2.45552e-124	4.64525e-122
Cox7c	0.515731	11.4763	570.544	1.24651e-123	2.34228e-121
Hp	-1.51257	9.37783	577.039	3.50638e-123	6.54478e-121
Hist1h2bc	0.788396	10.1376	568.193	3.86583e-123	7.16791e-121
Abhd14b	0.750939	9.57798	567.843	4.57449e-123	8.42608e-121
Aspdh	0.819157	9.4125	605.063	4.83267e-123	8.84348e-121
Rab3ip	0.78835	9.55954	567.424	5.59643e-123	1.01746e-120
Gas2	0.816373	9.55179	561.522	9.59643e-122	1.73342e-119
Ldhb	0.762919	10.4647	560.474	1.58953e-121	2.85281e-119
Tsc22d1	-1.01129	10.154	556.965	8.61552e-121	1.53642e-118
Msra	0.827188	9.61657	554.186	3.2874e-120	5.82536e-118
Ppa2	0.808259	9.46684	552.254	8.33812e-120	1.46824e-117
Fcer1g	-1.78336	9.61869	550.306	2.1326e-119	3.73178e-117
Acsm2	0.855798	10.8098	549.479	3.17601e-119	5.5231e-117
Gm42418	0.80931	9.58429	549.399	3.3022e-119	5.7071e-117
Rpl7	0.676754	10.2561	547.302	9.07027e-119	1.55797e-116
Alas1	-1.09054	9.48843	545.915	1.77079e-118	3.02309e-116
Rpl11	0.588574	10.7576	543.422	5.88954e-118	9.99366e-116
D630023F18Rik	0.911906	9.27314	963.963	6.03254e-118	1.01746e-115
Fmo2	0.787115	9.39761	599.564	6.21742e-118	1.04237e-115
Cd14	-1.21259	9.31277	830.316	1.01054e-117	1.68412e-115
Idh2	0.829657	9.67226	542.108	1.11027e-117	1.83938e-115
Hmox1	-1.29998	9.4784	541.613	1.40975e-117	2.32177e-115
H2-D1	-1.15573	10.1729	537.963	8.19663e-117	1.34204e-114
Psmb8	-1.25148	9.55333	534.785	3.79822e-116	6.1827e-114
Rpl10a	0.654113	10.351	532.52	1.13306e-115	1.83373e-113
Fkbp4	0.776828	9.44455	543.738	1.70019e-115	2.73575e-113
mt-Co3	0.643164	15.3034	528.686	7.20929e-115	1.1534e-112
Hrsp12	0.777542	10.6386	528.351	8.47518e-115	1.34823e-112
Mapt	0.834789	9.3413	730.97	1.60844e-114	2.54425e-112
Slc5a2	0.965587	9.53492	525.574	3.23922e-114	5.09504e-112
Rps7	0.648431	10.5458	525.357	3.59661e-114	5.62558e-112
Ndufv3	0.647235	10.2458	524.547	5.31667e-114	8.26979e-112
Smim24	0.835601	9.3868	591.524	5.9004e-114	9.12704e-112
Plin2	-1.1999	9.63938	524.174	6.36576e-114	9.79277e-112
Atp5j2	0.53089	10.8636	523.62	8.31945e-114	1.27283e-111
Sardh	0.777854	9.42631	554.667	1.81178e-113	2.75686e-111
mt-Cytb	0.644779	14.5318	521.163	2.72491e-113	4.12389e-111
Rps4x	0.658151	10.5769	519.792	5.28448e-113	7.95456e-111
4931406C07Rik	0.809955	9.86434	517.981	1.26733e-112	1.89747e-110
Lgals3bp	-1.28185	9.38872	698.385	1.33087e-111	1.98201e-109
Gpx1	0.712678	12.103	512.914	1.46632e-111	2.17217e-109
Erich4	0.751071	9.44284	510.128	5.63867e-111	8.30902e-109
Dnase1	0.919074	9.69057	509.18	8.9154e-111	1.30688e-108
Idh3b	0.77571	9.47099	508.281	1.37655e-110	2.00733e-108
Rpl29	0.618846	10.3757	507.824	1.71729e-110	2.49123e-108
Sdhb	0.679364	10.0102	507.584	1.92878e-110	2.7836e-108
Rpl6	0.624725	10.5816	505.563	5.12368e-110	7.35656e-108
Bphl	0.786792	9.61306	504.935	6.94146e-110	9.91566e-108
Idh3g	0.780184	9.5253	504.657	7.93849e-110	1.12823e-107
Ddt	0.735039	9.93451	502.333	2.4431e-109	3.45464e-107
Slc22a8	0.820641	9.49293	502.304	2.47804e-109	3.48644e-107
Qdpr	0.741784	9.68171	502.05	2.8008e-109	3.92084e-107
Rpl23	0.543355	10.8965	502.006	2.86197e-109	3.98654e-107
Ces1d	0.809468	9.40845	523.189	3.31343e-109	4.59255e-107
Ifit3	-1.4451	9.58183	736.235	1.02065e-108	1.4077e-106
Spr	0.755187	9.52233	497.3	2.78853e-108	3.82713e-106
Asl	0.773554	9.48579	494.146	1.28264e-107	1.75178e-105
Rpl35a	0.528967	11.0701	490.028	9.41098e-107	1.27907e-104
Ngp	-1.42615	9.34687	489.382	2.53875e-106	3.43381e-104
Ethe1	0.802486	9.59597	487.167	3.7612e-106	5.06279e-104
Abhd14a	0.875673	9.28905	866.865	3.8569e-106	5.16677e-104
Rpl13a	0.573621	11.0491	486.198	6.01271e-106	8.01637e-104
Acat1	0.763845	9.67913	483.86	1.86491e-105	2.47459e-103
Lrp2	0.795459	10.3977	483.264	2.48995e-105	3.28838e-103
Hadh	0.7261	9.69483	480.554	9.24894e-105	1.21574e-102
Uqcrh	0.519585	10.7916	479.642	1.43887e-104	1.88071e-102
BC026585	0.764997	9.52926	479.634	1.44422e-104	1.88071e-102
Cryl1	0.753857	9.51663	479.118	1.85484e-104	2.40426e-102
Bdh2	0.765818	9.6854	478.941	2.02078e-104	2.60727e-102
Cox5b	0.534465	10.8214	478.871	2.09019e-104	2.68445e-102
Rpsa	0.658553	10.2149	477.388	4.28864e-104	5.4828e-102
Cyc1	0.673178	9.93396	474.109	2.10113e-103	2.67398e-101
Cox5a	0.564856	10.5684	471.64	6.95143e-103	8.80661e-101
Sdhc	0.729763	9.63917	469.87	1.63939e-102	2.06755e-100
Rps24	0.587521	10.6654	469.787	1.7074e-102	2.14367e-100
Trabd2b	0.77651	9.34369	645.603	7.05675e-102	8.82031e-100
Slc5a12	0.797969	9.47574	466.792	7.29241e-102	9.07435e-100
Pdzk1	0.720368	9.98835	466.511	8.3591e-102	1.03557e-99
Arhgap24	0.781012	9.36736	595.205	8.78556e-102	1.0836e-99
Aldh4a1	0.744286	9.45677	465.27	1.52545e-101	1.87323e-99
Rplp2	0.563434	10.6804	464.283	2.46238e-101	3.01055e-99
Cyr61	0.859802	9.32266	542.932	3.39418e-101	4.13175e-99
Ccser2	0.710677	9.4623	462.277	6.51409e-101	7.8953e-99
Rpl26	0.514223	10.9832	461.852	8.00633e-101	9.66212e-99
Rhobtb1	0.816465	9.31542	716.479	1.87228e-100	2.24979e-98
Abat	0.808949	9.34418	589.252	2.11029e-100	2.52495e-98
Pde4d	0.694934	9.44913	457.561	6.41955e-100	7.64828e-98
Gm10804	0.786374	9.34942	615.706	8.21511e-100	9.74605e-98
Rpl30	0.648385	10.0455	454.16	3.34442e-99	3.95093e-97
Gnpda1	0.789688	9.3324	663.947	4.32504e-99	5.08792e-97
Wfdc21	-1.943	9.47321	453.532	4.53715e-99	5.31511e-97
Fau	0.540261	10.9674	452.414	7.80746e-99	9.10805e-97
Pdk4	-1.10301	9.36907	550.865	8.13857e-99	9.45492e-97
Rps3a1	0.593446	10.5538	451.799	1.05226e-98	1.2174e-96
Wnk1	1.01091	9.83215	451.106	1.47283e-98	1.69697e-96
Eci3	0.702716	9.41001	470.085	2.34668e-98	2.69272e-96
Atp5k	0.529639	10.8132	447.783	7.39419e-98	8.4499e-96
Rpl19	0.536612	10.7283	445.495	2.24642e-97	2.55672e-95
Rpl17	0.564808	10.7898	443.301	6.51998e-97	7.39055e-95
Rab11fip3	0.714032	9.55663	441.826	1.33488e-96	1.50701e-94
Rpl4	0.626441	10.2897	439.97	3.28964e-96	3.69893e-94
Rpl22	0.635844	10.0411	439.654	3.83406e-96	4.29384e-94
0610011F06Rik	0.711815	9.77019	434.738	4.18117e-95	4.66392e-93
Tcea3	0.642783	9.52382	433.48	7.70496e-95	8.56046e-93
Fam195a	0.683554	9.63906	433.36	8.16761e-95	9.0386e-93
Cxxc5	0.772078	9.37559	542.454	9.46332e-95	1.04257e-92
Nmrk1	0.726879	9.42007	448.432	9.49553e-95	1.04257e-92
Rps3	0.569823	10.5508	432.879	1.03196e-94	1.12862e-92
Rps12	0.639029	10.1711	430.126	3.93571e-94	4.28763e-92
Ndufb5	0.634066	9.98929	429.373	5.6752e-94	6.15869e-92
Pgam2	0.916592	9.41912	429.176	6.24634e-94	6.75232e-92
Hykk	0.600539	9.58961	429.051	6.63906e-94	7.14925e-92
Cldn10	0.731217	9.80904	427.655	1.30908e-93	1.40428e-91
Slc22a1	0.708994	9.4895	427.324	1.53765e-93	1.64317e-91
Rpl9	0.551699	10.6508	425.186	4.34816e-93	4.62889e-91
Spp2	0.877552	9.63394	424.06	7.52237e-93	7.9777e-91
Macrod2	0.68944	9.42691	425.518	1.23167e-92	1.30129e-90
Atp5o	0.606293	10.1914	422.95	1.29028e-92	1.35809e-90
Iigp1	-1.42121	9.49437	594.09	3.06256e-92	3.21145e-90
Naca	0.623605	10.069	417.184	2.13479e-91	2.23022e-89
Ndufa10	0.690723	9.61697	415.078	5.94838e-91	6.19118e-89
Rps8	0.508881	10.9083	414.071	9.71065e-91	1.00696e-88
Rps25	0.528736	10.6394	413.953	1.02882e-90	1.06291e-88
Slc47a1	0.690986	9.62074	413.786	1.11589e-90	1.14863e-88
Chchd3	0.684474	9.45711	424.538	1.16004e-90	1.1897e-88
Ak3	0.69918	9.44015	429.72	1.30025e-90	1.32863e-88
Iah1	0.717505	9.60105	413.371	1.36588e-90	1.39062e-88
Rps23	0.505315	11.1047	413.191	1.49066e-90	1.51215e-88
Ccdc107	0.701727	9.77503	411.767	2.98204e-90	3.01412e-88
Rps28	0.517573	10.8493	411.204	3.92244e-90	3.95037e-88
Ggt1	0.74972	9.8219	410.534	5.43584e-90	5.45494e-88
Atp5l	0.454167	11.2045	410.194	6.41513e-90	6.41467e-88
Ndufb9	0.52882	10.4818	406.792	3.36225e-89	3.35005e-87
Mt1	-1.2299	11.3603	405.49	6.34073e-89	6.29531e-87
Hspe1	0.593903	10.3659	405.252	7.12036e-89	7.04438e-87
Bsg	0.635119	9.92571	403.503	1.66912e-88	1.64549e-86
Scp2	0.599947	10.5141	402.38	2.88444e-88	2.83364e-86
Cyp4a10	-1.12428	9.94398	401.234	5.04208e-88	4.93595e-86
Rnf5	0.684844	9.46919	401.086	5.42074e-88	5.28815e-86
Aldoa	0.61096	10.2217	400.861	6.0489e-88	5.88045e-86
Ndufc2	0.600042	10.0564	400.815	6.1848e-88	5.99177e-86
Folr1	0.71531	9.75877	399.403	1.23081e-87	1.18829e-85
Ankrd13c	0.657486	9.58427	398.012	2.42436e-87	2.33255e-85
Gnas	0.655185	9.85555	396.768	4.44592e-87	4.2629e-85
Rps29	0.423916	11.7662	396.041	6.33773e-87	6.0561e-85
Arvcf	0.752255	9.21096	1937.15	9.07023e-87	8.6377e-85
D10Jhu81e	0.745957	9.35824	509.352	1.77156e-86	1.68136e-84
Rps13	0.556168	10.4534	393.183	2.55248e-86	2.41433e-84
Gcdh	0.676352	9.52975	392.455	3.64093e-86	3.43228e-84
Tmem150a	0.665095	9.41054	443.231	4.67591e-86	4.39316e-84
Mcee	0.689682	9.53268	391.637	5.42525e-86	5.08014e-84
Cyp4a14	-1.86257	10.0085	391.092	7.07719e-86	6.6049e-84
Slc25a5	0.531592	10.7037	390.99	7.43764e-86	6.91824e-84
Gpr137b	0.632556	9.45333	407.238	8.07065e-86	7.48219e-84
Emx1	0.762242	9.31987	536.568	1.43616e-85	1.32705e-83
Ypel3	0.708333	9.48824	389.09	1.87818e-85	1.72978e-83
Rpl39	0.509433	10.9172	388.703	2.2683e-85	2.08222e-83
Ppp1r1a	0.968729	9.77197	388.237	2.84784e-85	2.60568e-83
Adhfe1	0.675469	9.45554	384.667	1.62486e-84	1.48186e-82
Higd2a	0.602429	9.92751	384.623	1.66063e-84	1.50955e-82
Slc13a3	0.613128	9.63968	384.492	1.77029e-84	1.60404e-82
Eif3f	0.672412	9.65825	384.466	1.79275e-84	1.61914e-82
Haao	0.658663	9.37707	462.554	1.98854e-84	1.7902e-82
Mrpl12	0.625348	9.81121	384.185	2.05562e-84	1.84465e-82
Tpi1	0.602033	9.97363	383.646	2.67426e-84	2.39213e-82
Rps15	0.505329	10.6263	381.66	7.04709e-84	6.28358e-82
Spsb4	0.725021	9.28926	707.04	1.39083e-83	1.2362e-81
Cox7a2l	0.634964	9.78408	379.213	2.32634e-83	2.06117e-81
Slpi	-1.00776	9.27997	610.124	2.69735e-83	2.38234e-81
Mettl7a1	0.663474	9.47587	375.438	1.46921e-82	1.29355e-80
Prodh2	0.700255	9.34392	496.534	4.57082e-82	4.01172e-80
Gcat	0.789886	9.28248	660.987	2.75486e-81	2.41033e-79
Cdkl1	0.769338	9.24966	880.767	2.93868e-81	2.56315e-79
Cox7a2	0.435387	11.1594	367.759	6.25014e-81	5.43452e-79
Rps15a	0.539861	10.6916	367.618	6.69621e-81	5.80435e-79
Sostdc1	0.76345	9.47462	367.467	7.20898e-81	6.22953e-79
2300009A05Rik	0.649307	9.46575	367.089	8.67018e-81	7.46916e-79
Rnf187	0.64961	9.46227	365.775	1.64735e-80	1.4148e-78
Clta	0.653786	9.66589	365.683	1.72301e-80	1.47525e-78
mt-Nd1	0.525578	14.4722	364.764	2.70027e-80	2.30494e-78
Eef1b2	0.644382	9.65808	364.341	3.31978e-80	2.82515e-78
Papss2	0.65862	9.46599	362.828	6.95416e-80	5.90008e-78
Sap30	0.68727	9.39416	376.115	1.29696e-79	1.09705e-77
Gzma	-1.53842	9.45527	360.995	1.70368e-79	1.43674e-77
Map2k2	0.62363	9.50886	360.714	1.95366e-79	1.6426e-77
Eef1g	0.627658	9.74994	360.505	2.16434e-79	1.81428e-77
Tmem52b	0.962839	9.71846	359.888	2.92594e-79	2.44538e-77
Coq9	0.655436	9.42964	383.485	4.5672e-79	3.80572e-77
Tns1	0.613891	9.94791	358.478	5.83054e-79	4.84402e-77
Epn1	0.645667	9.46138	363.74	9.74757e-79	8.07433e-77
Ybx1	0.518875	10.8188	357.151	1.11538e-78	9.21189e-77
Nfkbia	-1.05368	9.51145	356.765	1.34681e-78	1.10906e-76
Ifi27	-0.887163	9.49886	355.722	2.24284e-78	1.8415e-76
Acss1	0.717879	9.38908	359.706	3.52233e-78	2.88357e-76
Ppia	0.486358	10.8421	354.317	4.45867e-78	3.63947e-76
Gcsh	0.609981	9.46993	353.499	6.65313e-78	5.41495e-76
Xylb	0.593406	9.46928	352.277	1.20917e-77	9.81285e-76
Fhl1	0.646414	9.37025	414.765	2.61845e-77	2.11882e-75
H1f0	0.707083	9.48939	350.072	3.55549e-77	2.86878e-75
Egf	1.06143	10.226	349.99	3.70159e-77	2.97808e-75
Aldh6a1	0.636568	9.93235	349.719	4.22718e-77	3.39119e-75
Ccl3	-0.960425	9.28288	514.673	4.61825e-77	3.69433e-75
mt-Nd4l	0.60244	10.7859	349.446	4.8298e-77	3.85256e-75
Lrpap1	0.666815	9.58945	348.982	6.06085e-77	4.82079e-75
Atp5g1	0.464592	10.9966	348.632	7.19448e-77	5.70626e-75
Slc34a3	0.770814	9.23189	1010.99	5.35566e-76	4.23581e-74
Zbtb20	0.645324	10.1782	344.451	5.56512e-76	4.38908e-74
Mpc2	0.509265	10.5316	344.138	6.48711e-76	5.10186e-74
Slc25a51	0.64354	9.51257	342.945	1.16287e-75	9.11993e-74
Slc12a3	0.99015	9.80159	342.536	1.42056e-75	1.11097e-73
Gzmb	-1.11744	9.29732	448.368	1.77417e-75	1.38366e-73
Mrpl34	0.612743	9.63871	341.247	2.67044e-75	2.07686e-73
Ndufa3	0.446957	10.654	341.009	3.00075e-75	2.32729e-73
Tmem27	0.675242	10.6576	339.758	5.53426e-75	4.28034e-73
Slc7a7	0.661625	9.40919	338.185	1.19537e-74	9.21979e-73
Icam1	-1.05427	9.3366	502.591	2.2929e-74	1.76364e-72
Tcn2	0.637044	10.1791	335.707	4.02284e-74	3.08579e-72
Tmem256	0.555147	10.0979	335.236	5.06675e-74	3.87593e-72
Ap2a2	0.603797	9.47629	337.684	7.40907e-74	5.65229e-72
Slc16a2	0.694721	9.34004	433.186	8.56415e-74	6.51574e-72
Ckb	0.735553	9.37919	333.109	1.43608e-73	1.08963e-71
Slc6a20b	0.604312	9.36387	439.324	2.37086e-73	1.79404e-71
Ascc1	0.582034	9.53895	331.397	3.32178e-73	2.50682e-71
Apom	0.696964	9.37214	339.589	6.15797e-73	4.6347e-71
Hnf4a	0.61801	9.56189	329.944	6.77108e-73	5.08248e-71
Polr1d	0.614687	9.6224	329.769	7.3751e-73	5.52107e-71
Cux1	0.65902	9.40841	368.52	1.1232e-72	8.38598e-71
Hgd	0.598218	9.47754	327.995	1.75956e-72	1.31021e-70
Pgpep1	0.642031	9.47205	327.755	1.97888e-72	1.46962e-70
Rpl18	0.513291	10.3588	326.789	3.17738e-72	2.35345e-70
Prelid1	0.591812	9.69759	324.58	9.37938e-72	6.92886e-70
Pth1r	0.62609	9.916	324.163	1.15094e-71	8.48003e-70
Slc22a30	0.617074	9.7605	324.008	1.24187e-71	9.12596e-70
Mdh2	0.613437	9.735	323.332	1.7296e-71	1.26768e-69
Col4a4	0.636288	9.52818	320.963	5.52461e-71	4.03859e-69
Pck1	-0.849189	11.0564	320.68	6.34674e-71	4.6275e-69
Ndufa13	0.430511	10.7149	319.427	1.1732e-70	8.53175e-69
Nit2	0.653603	9.38445	360.141	1.55343e-70	1.12676e-68
Adck3	0.705986	9.30612	516.912	2.04309e-70	1.4781e-68
Lipa	0.618715	9.4248	317.767	2.71231e-70	1.9572e-68
2020-09-15	0.598111	9.69758	317.139	3.60491e-70	2.59461e-68
Pdzd3	0.653248	9.29425	564.869	3.78167e-70	2.71485e-68
Aldh9a1	0.574258	9.47482	316.987	3.88289e-70	2.78039e-68
Ndufc1	0.49167	10.4133	316.874	4.1038e-70	2.93108e-68
Rpl14	0.46653	10.7385	316.839	4.17591e-70	2.97499e-68
D630029K05Rik	0.506145	9.39078	369.675	4.20527e-70	2.9883e-68
Slc25a11	0.625887	9.42475	375.156	5.07514e-70	3.59731e-68
Nupr1	-0.93437	9.29173	466.151	7.34968e-70	5.19637e-68
Acot13	0.593054	9.72039	315.497	8.06387e-70	5.68696e-68
Rpl38	0.421032	10.9739	314.975	1.04175e-69	7.32835e-68
Srcin1	0.679735	9.24931	787.227	1.11647e-69	7.83433e-68
Gm15638	0.616967	9.32613	453.558	1.53489e-69	1.07435e-67
Pdp2	0.675253	9.24337	800.799	2.92957e-69	2.04544e-67
Cyb5a	0.567837	10.8254	312.52	3.47482e-69	2.4201e-67
Ifitm2	-1.03078	9.81782	312.147	4.17244e-69	2.89876e-67
Pbld2	0.579702	9.47333	311.17	6.73744e-69	4.66918e-67
Rpl23a	0.487556	10.6272	310.039	1.17399e-68	8.1159e-67
Ndufv2	0.602177	9.74339	309.858	1.28251e-68	8.84427e-67
Dpep1	0.712827	9.29705	488.51	2.79583e-68	1.92328e-66
Chchd4	0.619578	9.41892	340.201	2.81459e-68	1.93144e-66
Gm4450	0.554056	9.29265	583.951	2.92464e-68	2.00205e-66
Acmsd	0.609428	9.28158	567.906	3.51179e-68	2.39812e-66
Myeov2	0.532585	9.97856	306.931	5.3965e-68	3.67619e-66
Eef1d	0.615022	9.52438	306.751	5.89383e-68	4.00523e-66
Tango2	0.660406	9.35098	398.555	6.09849e-68	4.13427e-66
Aldob	0.645738	11.4863	305.469	1.10566e-67	7.47737e-66
Cotl1	0.579657	9.53415	305.244	1.23518e-67	8.33318e-66
Atp5g3	0.476011	10.7452	305.186	1.27046e-67	8.55059e-66
Cyb5b	0.6044	9.55684	304.682	1.62771e-67	1.09287e-65
Slc22a12	0.655023	10.1156	304.475	1.80202e-67	1.20701e-65
Gstt1	0.657889	9.39305	313.373	1.98967e-67	1.32951e-65
Pdk2	0.618737	9.39112	363.745	2.48481e-67	1.65642e-65
Wnk4	0.669724	9.38325	316.961	2.69766e-67	1.79404e-65
Atp6v1e1	0.58666	9.78006	303.352	3.12728e-67	2.07482e-65
Gadd45g	-0.883842	9.68909	303.118	3.50813e-67	2.32037e-65
Plekha6	0.696542	9.2997	502.645	3.51395e-67	2.32037e-65
Ndufs2	0.58868	9.67923	302.886	3.93113e-67	2.58974e-65
Dao	0.594169	9.65978	302.055	5.91264e-67	3.88597e-65
Ubd	-1.07449	9.33913	592.932	1.18865e-66	7.7939e-65
Gabarap	0.492373	10.2053	300.622	1.1949e-66	7.81655e-65
Rpl36	0.405201	10.9522	298.075	4.17568e-66	2.72519e-64
Rps11	0.460879	10.7408	297.397	5.82454e-66	3.79245e-64
Dhrs3	0.638252	9.37792	370.519	7.41332e-66	4.81573e-64
2210011C24Rik	0.668108	9.25295	701.288	7.97732e-66	5.17012e-64
Glyctk	0.590704	9.32602	438.823	1.70822e-65	1.10454e-63
Upb1	0.600476	9.39252	346.286	2.36944e-65	1.52856e-63
Tapbp	-0.817862	9.47115	293.865	3.30373e-65	2.12639e-63
Cryz	0.59321	9.60419	293.677	3.62291e-65	2.32647e-63
2610528J11Rik	0.595561	9.40568	334.784	3.68001e-65	2.35773e-63
Mdk	0.712257	9.3101	383.144	3.80634e-65	2.4331e-63
Ddah1	0.588762	9.58081	293.201	4.57653e-65	2.91876e-63
Prdx5	0.406089	11.5151	292.404	6.77097e-65	4.30849e-63
Hibadh	0.579737	9.87899	292.126	7.76273e-65	4.92836e-63
Tmem229a	0.568463	9.43902	290.469	1.75296e-64	1.11039e-62
Fam13a	0.586816	9.35136	386.767	2.2902e-64	1.44743e-62
Ivd	0.629404	9.39721	312.01	3.63546e-64	2.29247e-62
Cd79a	0.609494	9.20141	1824.55	4.16387e-64	2.61978e-62
Grhpr	0.590005	9.55702	288.675	4.23303e-64	2.65732e-62
Pabpn1	0.589065	9.36398	397.331	6.77361e-64	4.24267e-62
Mrfap1	0.580789	9.6048	287.165	8.89364e-64	5.55813e-62
Evc	0.676338	9.28189	523.534	1.96215e-63	1.22353e-61
Tecr	0.605231	9.49605	284.372	3.51246e-63	2.18538e-61
Sdha	0.573579	9.81617	284.245	3.73804e-63	2.32057e-61
Manf	-0.753149	9.55248	283.818	4.61169e-63	2.85659e-61
Ndufa4	0.394494	11.4555	283.415	5.6226e-63	3.47509e-61
Ubc	0.528076	10.1874	282.954	7.05278e-63	4.34411e-61
Plekhb2	0.59833	9.41621	300.175	7.05968e-63	4.34411e-61
Pmpcb	0.674472	9.32549	406.24	7.53218e-63	4.62469e-61
Tprkb	0.545574	9.42799	306.492	8.93184e-63	5.47207e-61
mt-Nd5	0.517689	11.0479	281.93	1.16728e-62	7.13568e-61
Dpp7	0.703369	9.23672	776.912	1.56489e-62	9.5455e-61
Tmem64	0.632246	9.34908	361.597	1.63436e-62	9.94759e-61
Sms	0.636387	9.3386	379.213	1.70818e-62	1.03743e-60
Grb7	0.653799	9.29654	479.752	1.86977e-62	1.13311e-60
Prss8	0.578718	9.51441	280.792	2.04318e-62	1.23553e-60
Cisd1	0.489824	10.3175	280.686	2.1525e-62	1.29883e-60
Ndufs6	0.483657	10.138	280.564	2.28535e-62	1.37602e-60
Hint1	0.460752	10.6684	280.496	2.36332e-62	1.41992e-60
Rtp4	-0.999858	9.32537	507.46	4.84349e-62	2.90381e-60
Dhcr24	0.594782	9.42727	278.265	7.08178e-62	4.23666e-60
H2-T23	-0.817919	9.43459	290.114	8.23958e-62	4.9188e-60
Eif3h	0.574224	9.57982	277.233	1.17703e-61	7.01161e-60
Oaz2	0.596438	9.41284	310.18	1.19831e-61	7.12319e-60
Cdh16	0.638272	9.72843	276.604	1.60378e-61	9.51328e-60
Aldh7a1	0.58777	9.44331	275.913	2.25288e-61	1.33354e-59
Apbb2	0.626037	9.28224	529.792	2.70739e-61	1.59919e-59
Slc22a6	0.582446	9.85214	275.459	2.81708e-61	1.66048e-59
Vcam1	-0.98496	9.29959	459.179	2.98902e-61	1.75812e-59
Txndc17	0.553606	9.78731	274.246	5.1187e-61	3.00448e-59
Gcnt1	0.583213	9.74595	273.748	6.53819e-61	3.82963e-59
Npm1	0.591855	9.69882	273.575	7.12045e-61	4.16197e-59
Bpnt1	0.591735	9.61288	273.231	8.43408e-61	4.91953e-59
Ifitm6	-1.19507	9.31599	352.843	1.15482e-60	6.72195e-59
Abcg2	0.604119	9.66138	272.495	1.21185e-60	7.03931e-59
Tomm7	0.488235	10.0616	272.194	1.40513e-60	8.14508e-59
Timm9	0.605678	9.34911	370.988	1.86793e-60	1.08054e-58
Tyrobp	-1.24881	9.59344	271.567	1.9129e-60	1.10428e-58
Hmgcs2	-1.41578	9.55575	331.748	2.7066e-60	1.55924e-58
Acsm1	0.667161	9.30509	407.453	3.34689e-60	1.92415e-58
Ttr	0.799214	9.69724	270.311	3.54993e-60	2.0367e-58
Gpx3	0.606544	14.4511	269.262	5.9515e-60	3.40757e-58
Sfxn1	0.546211	9.71755	268.641	8.08112e-60	4.61745e-58
Rnf10	0.611583	9.37844	331.758	8.79844e-60	5.01708e-58
Fbp1	0.592003	10.1257	268.037	1.08775e-59	6.18999e-58
Col4a3	0.551375	9.44783	272.132	1.55364e-59	8.82327e-58
Ppm1h	0.628594	9.35609	335.309	1.67599e-59	9.49888e-58
Nfic	0.59462	9.35242	374.845	1.94656e-59	1.101e-57
Uqcrc1	0.544662	9.76284	266.662	2.14169e-59	1.20893e-57
Cdkn1a	-0.817648	9.33143	317.345	2.59436e-59	1.46151e-57
Igtp	-1.12541	9.42259	444.642	2.71556e-59	1.52671e-57
Actg1	0.564156	10.381	265.963	3.02082e-59	1.69493e-57
Atp5j	0.392496	11.0063	265.183	4.43636e-59	2.48418e-57
Tkt	0.577797	9.44041	272.986	5.05615e-59	2.82559e-57
Gpi1	0.550762	9.55203	263.796	8.78371e-59	4.89893e-57
Lrg1	-1.25333	9.33729	397.062	9.48182e-59	5.27777e-57
D630024D03Rik	0.631061	9.25078	632.636	1.17231e-58	6.51238e-57
Idh1	0.607151	9.88244	262.708	1.50144e-58	8.32419e-57
Phb2	0.541275	9.555	262.624	1.56488e-58	8.65877e-57
Tpcn1	0.606173	9.31865	426.485	1.70854e-58	9.43503e-57
Ggct	0.645316	9.2773	467.547	3.02905e-58	1.66944e-56
Mrps36	0.531785	9.69453	260.519	4.41567e-58	2.42888e-56
Ahcyl2	0.53312	9.44146	271.841	7.43676e-58	4.08264e-56
BC089597	0.556366	9.3136	416.516	8.44818e-58	4.62881e-56
Mien1	0.543517	9.68113	258.91	9.7545e-58	5.33411e-56
Wdr18	0.642371	9.32681	355.285	1.06026e-57	5.78656e-56
Gm3716	0.546254	9.23148	814.684	1.8331e-57	9.98503e-56
Ankrd12	0.672738	9.28723	455.489	2.64493e-57	1.43792e-55
Pepd	0.601869	9.37544	295.637	2.76029e-57	1.49773e-55
Eif3i	0.579136	9.41396	282.859	3.07115e-57	1.66317e-55
Lmo4	0.572451	9.4453	256.215	3.68149e-57	1.98985e-55
Plaur	-0.767307	9.25362	557.468	6.14954e-57	3.31743e-55
Paics	0.571006	9.42012	258.479	7.47445e-57	4.02441e-55
Kcnj1	0.684387	9.43718	254.701	7.76572e-57	4.17322e-55
Cks2	0.541888	9.52819	254.337	9.29267e-57	4.98422e-55
Cp	-0.758348	9.24982	563.565	9.68719e-57	5.18589e-55
Rpl31	0.427966	10.4759	253.927	1.13731e-56	6.07679e-55
Amn	0.606192	9.38195	292.673	2.45756e-56	1.31061e-54
Dalrd3	0.64617	9.31209	399.824	2.76785e-56	1.47327e-54
Car14	0.531789	9.37212	314.501	2.86399e-56	1.52156e-54
Ndufv1	0.564934	9.54035	250.832	5.2316e-56	2.77414e-54
Cyp2d12	0.637797	9.29202	328.151	5.37333e-56	2.8439e-54
Sdhd	0.529324	9.66779	250.301	6.79888e-56	3.59161e-54
Ndufa6	0.3893	10.7281	249.06	1.2539e-55	6.61144e-54
Ces1e	0.628117	9.24984	586.574	2.79183e-55	1.46928e-53
Odc1	0.554703	9.85153	246.689	4.03818e-55	2.12122e-53
Pdha1	0.555704	9.64228	246.45	4.54271e-55	2.38177e-53
Klf15	0.538791	9.30458	434.417	5.85412e-55	3.06362e-53
Lypla1	0.542443	9.58194	245.928	5.87706e-55	3.06989e-53
Tpt1	0.398484	11.419	245.334	7.87952e-55	4.10821e-53
Ank3	0.537235	9.50018	245.296	8.03012e-55	4.17895e-53
BC021785	0.50133	9.55285	245.286	8.06862e-55	4.19119e-53
Penk	0.34196	9.18661	4056.9	8.32768e-55	4.31775e-53
Sod3	0.522712	9.50475	245.145	8.64822e-55	4.47565e-53
B3gat2	0.565479	9.25818	559.184	1.19855e-54	6.19132e-53
Rap1b	-0.725649	9.5346	244.171	1.39874e-54	7.21214e-53
Gbp6.1	-0.894772	9.26237	673.549	1.74815e-54	8.99718e-53
Slc17a3	0.538764	9.60105	243.493	1.95406e-54	1.00385e-52
Bod1	0.580909	9.34162	339.996	2.1721e-54	1.11382e-52
Pebp1	0.47955	10.0665	243.131	2.33625e-54	1.1958e-52
Bckdha	0.549535	9.47807	242.882	2.64241e-54	1.35004e-52
Acaa2	0.530413	9.53152	242.56	3.09764e-54	1.57974e-52
Khk	0.544585	10.1441	242.323	3.4816e-54	1.77232e-52
Gbp3	-0.987696	9.29434	593.416	3.93374e-54	1.99886e-52
Mpc1	0.448008	10.5433	241.844	4.40908e-54	2.23633e-52
Stard10	0.518825	9.74157	241.517	5.18301e-54	2.62412e-52
RP23-306P12.2	0.544603	9.77169	241.024	6.60917e-54	3.34014e-52
Malat1	0.816482	15.9535	240.723	7.6701e-54	3.86933e-52
Smpdl3a	0.548548	9.77379	240.674	7.85513e-54	3.95554e-52
Acaa1b	0.490449	9.81537	240.482	8.63962e-54	4.34277e-52
Prdx2	0.542709	9.6925	239.944	1.12667e-53	5.65312e-52
Fahd1	0.52578	9.51674	239.4	1.47365e-53	7.38089e-52
Rps16	0.40959	10.8345	239.093	1.71491e-53	8.57396e-52
Gstz1	0.5018	9.51467	238.373	2.44652e-53	1.22099e-51
Ndufb11	0.456344	10.1281	238.215	2.64502e-53	1.31771e-51
Slc7a8	0.569673	9.38752	261.473	2.87877e-53	1.43161e-51
Klf9	0.532837	9.52322	237.571	3.63486e-53	1.80441e-51
Hspd1	0.528549	9.70612	236.601	5.86744e-53	2.90755e-51
Zfp467	0.632071	9.29817	391.967	6.19018e-53	3.06206e-51
Nr2f6	0.565914	9.38697	288.769	6.3197e-53	3.12062e-51
Ftl1	0.444173	13.3174	235.841	8.53998e-53	4.20955e-51
Rpl13	0.398918	11.2242	235.733	9.00986e-53	4.43336e-51
Rbm3	-0.645889	9.79505	235.353	1.08689e-52	5.33871e-51
Rpl5	0.492135	9.92328	235.184	1.18105e-52	5.79108e-51
Mthfd1	0.584055	9.31449	372.349	1.22522e-52	5.99717e-51
Lamp1	0.484934	10.0987	234.333	1.79836e-52	8.78718e-51
Etfa	0.526346	9.73815	233.692	2.46776e-52	1.2037e-50
Serf2	0.349842	10.881	232.587	4.259e-52	2.0738e-50
Mif	0.451474	10.704	232.539	4.36201e-52	2.12027e-50
Dhrs4	0.533625	9.56916	232.46	4.53506e-52	2.20057e-50
Clpx	0.579122	9.36773	274.767	5.05974e-52	2.45091e-50
Atxn7l3b	0.536649	9.46208	231.831	6.18719e-52	2.99186e-50
Arl6ip1	0.495495	10.087	231.746	6.4541e-52	3.11555e-50
Eif4a2	0.516818	9.76797	231.32	7.96502e-52	3.83829e-50
Rpl3	0.454985	10.422	231.004	9.30989e-52	4.47866e-50
Adap2	0.570103	9.2438	604.038	9.97377e-52	4.7898e-50
Cyp2j5	0.550289	10.0197	229.917	1.59323e-51	7.63821e-50
Acss2	0.503252	9.35053	315.761	1.8541e-51	8.87368e-50
Ifit2	-1.1908	9.43478	507.972	2.6562e-51	1.26908e-49
Igfbp4	0.563058	9.91673	228.01	4.08597e-51	1.94888e-49
Kcnq1ot1	0.578506	9.3352	313.114	4.98741e-51	2.37479e-49
Saa1	-2.8435	9.85032	227.559	5.10684e-51	2.42753e-49
Oaz1	0.37807	10.6256	227.477	5.31923e-51	2.5242e-49
Ndufs8	0.514126	9.74054	227.352	5.65834e-51	2.68058e-49
Rpl32	0.379464	11.2234	227.319	5.74936e-51	2.7191e-49
Gde1	0.528652	9.4235	245.467	5.76805e-51	2.72334e-49
Gtf2i	0.561026	9.35107	324.522	6.72182e-51	3.16831e-49
Aqp11	0.532216	9.27081	472.901	1.00443e-50	4.7264e-49
Txn2	0.512236	9.61963	225.694	1.28336e-50	6.02876e-49
Iscu	0.477957	9.99636	224.921	1.88096e-50	8.8213e-49
Stx16	0.589538	9.32981	340.003	1.97303e-50	9.23758e-49
Sult1c2	0.560267	9.26327	491.163	3.4805e-50	1.62683e-48
Mrpl4	0.539515	9.41225	247.053	3.59476e-50	1.67744e-48
Ndufa1	0.410423	10.4416	223.45	3.89221e-50	1.81321e-48
Lyplal1	0.593255	9.26862	439.093	4.73654e-50	2.20288e-48
Mpst	0.53835	9.33269	323.58	6.53159e-50	3.03269e-48
Ccnd1	0.506784	9.49131	222.339	6.742e-50	3.12521e-48
Npm3	0.578979	9.33813	283.208	8.41472e-50	3.89414e-48
Park7	0.443038	10.4295	220.948	1.34114e-49	6.19626e-48
Morn2	0.564462	9.33178	304.042	1.83532e-49	8.46547e-48
Ndufs1	0.571385	9.35771	290.595	1.92861e-49	8.88113e-48
Phyh	0.521344	9.64285	219.908	2.24253e-49	1.03098e-47
Rhob	-0.742753	9.41813	219.744	2.43149e-49	1.11601e-47
Pnisr	0.514822	9.5036	219.709	2.47465e-49	1.13397e-47
Cd79b	0.478718	9.19606	2020.3	2.50586e-49	1.14639e-47
Aqp1	0.511246	9.63285	218.567	4.35293e-49	1.98815e-47
Cyp2j13	0.494066	9.33227	308.454	4.4103e-49	2.01107e-47
Eif1	0.37482	10.7154	218.239	5.11754e-49	2.32977e-47
Paqr7	0.566294	9.25527	502.976	5.27621e-49	2.39811e-47
Hagh	0.507795	9.69076	217.633	6.90714e-49	3.1343e-47
Slc25a39	0.505395	9.70231	216.907	9.8896e-49	4.4804e-47
Pglyrp1	-1.02928	9.31455	285.595	1.11703e-48	5.05245e-47
Cbs	0.591543	9.27791	392.647	1.17525e-48	5.30722e-47
Rps5	0.400361	10.8094	216.168	1.4254e-48	6.42646e-47
Acads	0.523633	9.4346	216.747	1.44796e-48	6.51769e-47
Me1	0.531992	9.54777	215.449	2.03477e-48	9.14439e-47
Bcl2a1b	-0.687476	9.25093	400.846	2.06981e-48	9.28693e-47
Nfkbiz	-0.758597	9.276	422.651	2.23241e-48	1.00005e-46
Ggnbp1	0.577439	9.32919	316.912	2.72713e-48	1.21972e-46
G6pc	0.605625	9.8711	214.555	3.16622e-48	1.41384e-46
Slc43a2	0.514918	9.42414	225.706	3.43089e-48	1.52958e-46
Hsd3b3	0.432712	9.31181	361.337	3.65744e-48	1.628e-46
Snx3	0.510237	9.59216	214.034	4.09832e-48	1.82135e-46
Usmg5	0.357286	10.9463	213.997	4.17274e-48	1.85148e-46
Thnsl2	0.493584	9.41313	237.845	4.37019e-48	1.93602e-46
Hoxa7	0.536727	9.35013	290.946	5.05801e-48	2.23719e-46
Rpl27a	0.38846	10.6955	213.602	5.07337e-48	2.24045e-46
Ift20	0.534172	9.41867	233.721	6.04254e-48	2.66424e-46
Cuta	0.50717	9.49274	212.751	7.73169e-48	3.40364e-46
Gpx4	0.381524	11.2438	212.522	8.65868e-48	3.80574e-46
Ifit3b	-1.03115	9.40333	472.679	9.14173e-48	4.01176e-46
Adap2os	0.562704	9.25557	481.039	9.27367e-48	4.06329e-46
Cndp1	0.543355	9.24215	550.022	9.54252e-48	4.17456e-46
Nisch	0.511441	9.50544	212.119	1.05699e-47	4.61679e-46
Angptl4	-0.670792	9.46006	212.024	1.10757e-47	4.83016e-46
BC004004	0.506134	9.49665	211.97	1.13792e-47	4.95482e-46
Mrps21	0.431461	10.1399	211.646	1.33562e-47	5.80662e-46
Gdi2	0.499333	9.60111	210.676	2.15834e-47	9.36889e-46
Gbp7	-0.930523	9.3582	420.786	2.80458e-47	1.21552e-45
Bag1	0.495194	9.75873	209.839	3.26634e-47	1.41346e-45
Fahd2a	0.565715	9.3491	278.35	3.83439e-47	1.65672e-45
Gnb2l1	0.477836	9.84434	209.424	4.01026e-47	1.73004e-45
Fkbp5	-0.717609	9.32828	309.784	4.01986e-47	1.73151e-45
Lamtor1	0.516726	9.43492	224.786	5.03752e-47	2.16652e-45
Aldh8a1	0.509098	9.46556	208.646	5.895e-47	2.53142e-45
Chrna4	0.585502	9.24452	515.293	6.2333e-47	2.67259e-45
Lad1	0.574335	9.31183	317.962	6.86028e-47	2.93692e-45
Trim7	0.506796	9.39512	219.219	6.87335e-47	2.93801e-45
Got2	0.505395	9.49486	208.047	7.93036e-47	3.38467e-45
Vmp1	-0.63796	9.51241	207.85	8.74084e-47	3.7249e-45
Spns3	0.522525	9.25691	454.268	9.32038e-47	3.96584e-45
Ppargc1a	0.507897	9.41882	219.599	9.48399e-47	4.02933e-45
Calb1	0.83555	9.96866	207.36	1.11423e-46	4.72671e-45
Ergic3	0.549916	9.38594	246.689	1.20417e-46	5.1005e-45
Auh	0.561831	9.36697	250.265	1.25859e-46	5.32297e-45
Uqcrb	0.38711	10.7101	207.068	1.28767e-46	5.43775e-45
Rab24	0.541325	9.40106	236.392	1.49019e-46	6.28348e-45
Cd3g	0.5903	9.22067	651.654	1.53941e-46	6.48126e-45
Esrra	0.498484	9.35584	294.939	2.02364e-46	8.50719e-45
Hoxb3os	0.551516	9.32404	298.305	2.1327e-46	8.95222e-45
Vdr	0.509547	9.41662	215.348	2.35839e-46	9.88474e-45
Pabpc1	0.507297	9.68276	205.702	2.53184e-46	1.05959e-44
Nipsnap1	0.505329	9.36063	265.789	2.62909e-46	1.09864e-44
Calml4	0.508045	9.90489	205.505	2.79176e-46	1.16488e-44
2200002D01Rik	-0.687543	9.36903	239.373	3.16545e-46	1.31884e-44
Tbxas1	0.478652	9.209	945.62	3.79895e-46	1.58043e-44
Rpl18a	0.369377	11.1214	204.817	3.92553e-46	1.63067e-44
Afap1l1	0.467675	9.25726	456.669	4.00071e-46	1.65944e-44
Cyp2d26	0.459901	9.42488	211.811	4.69178e-46	1.9432e-44
Fdx1	0.505315	9.56147	204.223	5.26819e-46	2.17871e-44
Eif3l	0.57096	9.3208	301.478	5.98232e-46	2.4704e-44
2700060E02Rik	0.50763	9.55209	203.639	7.03342e-46	2.90017e-44
H2-Ke6	0.526826	9.41442	218.846	7.21189e-46	2.96939e-44
Npnt	0.55092	9.36258	216.392	7.98512e-46	3.28293e-44
Lhx1	0.531254	9.26758	395.434	9.31997e-46	3.82611e-44
Mlf2	0.496116	9.57114	202.082	1.52096e-45	6.23481e-44
Mccc1	0.582519	9.285	359.029	1.77414e-45	7.26204e-44
Rps27a	0.378927	10.9071	201.728	1.81185e-45	7.40556e-44
Uqcrq	0.333922	11.09	200.84	2.81361e-45	1.14833e-43
Idi1	0.54016	9.27264	392.027	2.95938e-45	1.20607e-43
Samhd1	-0.820931	9.32694	295.946	3.00141e-45	1.22142e-43
Smim10l1	0.493706	9.45644	200.19	3.88229e-45	1.5776e-43
Ube2r2	0.496816	9.44432	201.683	3.92728e-45	1.59357e-43
Ndufs5	0.43871	9.98974	199.892	4.5007e-45	1.8236e-43
Ctsa	0.544697	9.39564	236.625	4.62473e-45	1.87114e-43
C1qbp	0.527793	9.39947	215.754	6.24183e-45	2.52177e-43
Pyurf	0.516669	9.39185	233.335	8.36001e-45	3.37267e-43
Mlxipl	0.516147	9.4277	198.547	8.76341e-45	3.53033e-43
Lamtor4	0.481194	9.66582	197.977	1.16228e-44	4.6755e-43
Aatf	0.559862	9.30364	320.383	1.33806e-44	5.37488e-43
Rpl27	0.409749	10.2775	196.929	1.95376e-44	7.83689e-43
Mff	0.506602	9.42068	208.805	2.31266e-44	9.26321e-43
Ogt	0.496026	9.56917	196.068	2.99322e-44	1.1972e-42
Xbp1	-0.609685	9.45987	195.812	3.39786e-44	1.35711e-42
Tln2	0.528453	9.27436	392.396	4.10847e-44	1.63859e-42
Rbm39	0.461816	9.97823	195.228	4.53916e-44	1.80779e-42
Dgcr6	0.492646	9.50836	195.065	4.92103e-44	1.95709e-42
Efhd1	0.542542	9.35302	212.925	5.03058e-44	1.99782e-42
Csnk2b	0.515984	9.40703	217.866	5.04724e-44	2.00159e-42
Pgam1	0.47301	9.67937	194.961	5.17949e-44	2.05114e-42
Serpinf2	0.519283	9.3501	239.355	5.8414e-44	2.30999e-42
Vdac2	0.479674	9.63231	194.529	6.41592e-44	2.53361e-42
Fmo1	0.457471	9.67952	194.448	6.6789e-44	2.63374e-42
Ndufb2	0.422843	10.0897	194.37	6.94451e-44	2.73463e-42
Grtp1	0.503974	9.26039	422.968	1.50703e-43	5.9261e-42
Prkcz	0.534089	9.34473	256.981	1.8466e-43	7.25119e-42
Ndufb10	0.41575	10.0958	191.311	3.16309e-43	1.24034e-41
Plekhg3	0.526183	9.28141	368.462	4.44204e-43	1.73942e-41
Espn	0.561132	9.30362	293.518	4.7287e-43	1.84908e-41
Anapc13	0.430866	10.0159	190.195	5.50107e-43	2.1481e-41
Suclg1	0.45672	9.76074	189.969	6.15556e-43	2.40032e-41
Echdc2	0.480372	9.44707	190.216	7.77952e-43	3.02936e-41
Cluh	0.511752	9.38056	233.529	8.013e-43	3.11594e-41
Ndufab1	0.410399	10.1402	189.162	9.18177e-43	3.56548e-41
Chchd7	0.484588	9.45568	189.132	9.31887e-43	3.61371e-41
Snx10	-0.799767	9.28414	408.121	1.06059e-42	4.10711e-41
2020-03-02	0.491236	9.59119	188.728	1.13862e-42	4.40319e-41
Baiap2	0.506607	9.29163	349.289	1.15706e-42	4.46834e-41
Aco2	0.455783	9.7893	188.553	1.24213e-42	4.79025e-41
4430402I18Rik	0.464581	9.31484	289.607	1.33492e-42	5.14101e-41
Acsl1	0.484781	9.50981	187.644	1.94909e-42	7.49596e-41
Atraid	0.489177	9.48008	187.447	2.14987e-42	8.25679e-41
Mpv17	0.53699	9.32018	277.692	2.18688e-42	8.38742e-41
Rp9	0.51871	9.36291	242.357	2.22857e-42	8.53565e-41
Hnf4g	0.464745	9.24327	497.308	2.55465e-42	9.77119e-41
Gm11128	0.328406	9.54675	186.781	2.99151e-42	1.14265e-40
Gngt2	-0.875846	9.34921	216.93	3.05983e-42	1.16662e-40
Smim20	0.494971	9.42046	208.199	3.06259e-42	1.16662e-40
Asna1	0.535353	9.33565	261.974	3.14513e-42	1.19643e-40
Wfdc15b	0.737287	9.96765	186.321	3.75754e-42	1.42746e-40
Csad	0.43352	9.39809	207.133	3.78884e-42	1.4374e-40
Smarca2	0.452425	9.44178	187.427	4.10815e-42	1.55643e-40
Eif3m	0.506343	9.40755	199.32	5.00763e-42	1.89464e-40
L3hypdh	0.476407	9.28482	348.943	6.27439e-42	2.37072e-40
Nr2f2	0.487928	9.40338	210.731	6.32376e-42	2.38616e-40
Cubn	0.419668	9.46784	185.003	7.22458e-42	2.72239e-40
Rab17	0.548354	9.27161	370.119	8.21039e-42	3.08971e-40
Anxa2	-0.686495	9.34599	191.569	8.5017e-42	3.19504e-40
Susd2	0.504215	9.29535	303.095	8.63996e-42	3.24265e-40
Acbd4	0.510928	9.34514	255.961	8.8098e-42	3.30196e-40
Stk16	0.509549	9.37317	224.911	9.26477e-42	3.46785e-40
Fabp4	-0.906082	9.45769	184.172	1.09127e-41	4.07922e-40
mt-Atp6	0.392107	15.333	184.017	1.17829e-41	4.39864e-40
Alox5ap	-0.940812	9.33288	225.856	1.33342e-41	4.97111e-40
Vkorc1	0.529754	9.34251	258.383	1.34366e-41	5.00262e-40
Fuca1	0.467805	9.59926	183.244	1.72971e-41	6.43139e-40
Prodh	0.466772	9.45464	183.057	2.21707e-41	8.23255e-40
Slc6a19	0.564555	9.54448	182.737	2.22432e-41	8.24343e-40
Slc7a9	0.495471	9.37202	224.026	2.22589e-41	8.24343e-40
Rufy3	0.513752	9.33563	258.65	2.64565e-41	9.78506e-40
Mrps24	0.458289	9.71698	182.246	2.83859e-41	1.04848e-39
Gm10053	-0.616982	9.56856	182.14	2.99191e-41	1.10366e-39
Fpr2	-0.563607	9.22378	559.987	3.35234e-41	1.23499e-39
Trim30a	-0.830972	9.30751	405.666	3.47601e-41	1.27886e-39
Map1lc3a	0.470792	9.63558	181.814	3.51696e-41	1.29223e-39
Wbp2	0.485034	9.41408	199.469	3.59223e-41	1.31816e-39
Guca2b	-0.587117	11.4261	181.576	3.95682e-41	1.45004e-39
Tm2d2	0.468142	9.44822	188.814	3.9715e-41	1.45352e-39
Dcaf11	0.525884	9.35814	238.373	4.68288e-41	1.71164e-39
Tnfrsf12a	-0.691695	9.29791	301.067	4.9463e-41	1.80556e-39
Kap	0.738447	13.3527	180.774	5.89215e-41	2.14803e-39
Ndufa8	0.431456	9.85586	180.649	6.26968e-41	2.28269e-39
Rabggtb	0.533691	9.32985	257.669	6.58941e-41	2.39598e-39
Sgk2	0.479474	9.34849	249.273	6.63792e-41	2.41049e-39
Mlec	0.47567	9.56027	180.298	7.4622e-41	2.7063e-39
Rbpms2	0.456177	9.42588	185.569	8.52867e-41	3.08908e-39
Itpr2	0.544733	9.28332	317.585	1.17692e-40	4.2573e-39
Gsta2	0.546191	9.70082	179.235	1.26513e-40	4.57047e-39
D630045J12Rik	0.52372	9.29185	309.008	1.72678e-40	6.23019e-39
Ugt2b37	0.530587	9.25998	355.446	1.89138e-40	6.81531e-39
Pts	0.496735	9.39604	206.163	1.89977e-40	6.83675e-39
Rnf167	0.560727	9.28145	329.59	1.932e-40	6.94378e-39
Ubl5	0.404249	10.0268	178.367	1.94655e-40	6.97831e-39
Apoe	0.574388	9.50751	178.367	1.94659e-40	6.97831e-39
Chmp6	0.480696	9.39147	213.906	2.28995e-40	8.19872e-39
Atp6v1b1	0.503783	9.23729	450.526	2.8302e-40	1.012e-38
Frrs1	0.501474	9.33754	251.17	3.03003e-40	1.08208e-38
Adh5	0.544775	9.32497	250.927	3.06897e-40	1.09459e-38
Dhfr	0.49854	9.28904	309.385	3.22415e-40	1.14847e-38
Sigirr	0.488704	9.3133	289.99	3.57119e-40	1.27047e-38
Bcl2a1d	-0.526389	9.22111	568.449	3.76202e-40	1.33666e-38
Mrps35	0.524061	9.31683	267.257	3.97286e-40	1.40979e-38
Fn3k	0.492417	9.22315	638.93	4.35491e-40	1.5434e-38
Aldh2	0.465699	9.72767	176.594	4.6937e-40	1.66137e-38
Xaf1	-0.815918	9.29747	357.576	4.80368e-40	1.69815e-38
Rps9	0.36394	10.6929	176.489	4.9454e-40	1.74604e-38
Nenf	0.486007	9.4834	176.015	6.25766e-40	2.20657e-38
Zfp771	0.542284	9.28025	325.394	6.74357e-40	2.37492e-38
Sfxn2	0.477165	9.27684	355.751	7.49176e-40	2.6351e-38
Ifitm1	-1.38055	9.38759	176.549	8.72967e-40	3.06667e-38
Cyfip2	0.490247	9.39449	181.498	8.74703e-40	3.06891e-38
Bscl2	0.506063	9.3082	291.129	9.8109e-40	3.43787e-38
Romo1	0.385879	10.1638	174.771	1.16033e-39	4.06087e-38
Sat1	-0.458366	10.3451	174.394	1.39965e-39	4.8923e-38
Litaf	-0.648624	9.32292	243.448	1.56617e-39	5.46752e-38
Hspa5	-0.560985	9.89436	173.893	1.79496e-39	6.25844e-38
Slc9a3r1	0.456487	9.5451	173.46	2.22583e-39	7.74904e-38
Il11ra1	0.537	9.28858	313.276	2.22801e-39	7.74904e-38
Osr2	0.497285	9.21726	670.046	2.24198e-39	7.78797e-38
Fgb	-1.19078	9.43339	349.101	2.42299e-39	8.40629e-38
Mrpl28	0.472534	9.46146	173.184	2.55205e-39	8.8431e-38
Hsd11b2	0.679247	9.48621	173.138	2.61113e-39	9.03665e-38
Il1rn	-0.507682	9.2194	606.594	2.62139e-39	9.06095e-38
Junb	-0.697677	9.56268	173.031	2.75395e-39	9.5074e-38
Setd8	0.486837	9.3406	241.954	2.77396e-39	9.56468e-38
Lman2l	0.544581	9.2691	358.71	4.42414e-39	1.52358e-37
Osbpl6	0.445897	9.35942	230.774	4.45212e-39	1.53133e-37
Psmb10	-0.731221	9.35092	237.445	4.67245e-39	1.60514e-37
Cyp24a1	0.226238	9.47595	171.58	5.66314e-39	1.9431e-37
Thap4	0.51639	9.32125	257.084	7.00491e-39	2.40053e-37
Aamdc	0.467517	9.41351	180.576	7.328e-39	2.50818e-37
Cyp2e1	0.55423	10.0591	170.796	8.35846e-39	2.85739e-37
Cdk4	0.521291	9.32795	245.709	1.17872e-38	4.02462e-37
Poldip2	0.517845	9.34219	231.141	1.27154e-38	4.33624e-37
8430408G22Rik	-0.704425	9.28743	274.752	1.36185e-38	4.63856e-37
Rnpepl1	0.504335	9.34451	227.999	1.87301e-38	6.37188e-37
1110001J03Rik	0.4414	9.74031	168.68	2.39277e-38	8.13019e-37
Ninj1	0.462334	9.60092	168.564	2.53385e-38	8.59912e-37
Ccdc141	0.471144	9.33183	249.629	2.60896e-38	8.84329e-37
Tnfsf10	-0.709144	9.31506	284.337	2.95347e-38	9.99895e-37
Kif12	0.46727	9.40557	190.927	3.00265e-38	1.01532e-36
Brk1	0.453416	9.47839	168.028	3.30709e-38	1.11691e-36
Dhrs1	0.48497	9.35359	209.891	4.02937e-38	1.35921e-36
Zfp444	0.496113	9.27872	313.64	4.06546e-38	1.36973e-36
Tspan3	0.472486	9.52719	167.535	4.22514e-38	1.42182e-36
Ugt3a2	0.524483	9.96104	167.489	4.32288e-38	1.45297e-36
Prdx3	0.460936	9.49476	167.414	4.48767e-38	1.50654e-36
Dmtn	0.483541	9.32033	263.202	5.16223e-38	1.73092e-36
Tufm	0.532594	9.29381	280.065	6.00779e-38	2.01126e-36
Lst1	-0.956439	9.31864	236.581	6.01266e-38	2.01126e-36
AA467197	-0.670681	9.23762	459.197	6.75347e-38	2.25637e-36
Vegfb	0.473661	9.28329	320.92	6.92582e-38	2.31119e-36
Stxbp5l	0.451167	9.20905	853.259	1.07123e-37	3.57052e-36
Ppard	0.483791	9.20958	761.639	1.13963e-37	3.79398e-36
Mrpl50	0.484955	9.41496	171.607	1.18664e-37	3.94579e-36
Cttnbp2	0.502244	9.24171	444.899	1.33805e-37	4.44398e-36
Cct4	0.482617	9.39687	178.647	1.6044e-37	5.32227e-36
Rpl12	0.430283	9.91139	164.679	1.748e-37	5.79176e-36
Gltscr2	0.482894	9.41542	175.574	1.77587e-37	5.87716e-36
Tmem86a	0.464091	9.21542	699.242	1.80786e-37	5.97597e-36
Rps26	0.364346	10.4592	164.527	1.88482e-37	6.223e-36
Pink1	0.449936	9.43339	174.485	1.9962e-37	6.58301e-36
Bsnd	0.470009	9.23513	468.568	2.0876e-37	6.8763e-36
2410015M20Rik	0.38646	10.0851	164.251	2.16178e-37	7.1123e-36
Sel1l3	0.480435	9.25092	402.857	2.42982e-37	7.98475e-36
Eif3k	0.450837	9.6544	163.963	2.49507e-37	8.18958e-36
Rhcg	0.525646	9.30066	216.578	2.67971e-37	8.78532e-36
Lhx1os	0.506317	9.32972	219.596	3.25183e-37	1.06485e-35
Wdr89	0.456448	9.55561	163.385	3.32657e-37	1.08805e-35
Alpl	0.399583	9.46419	162.829	4.38397e-37	1.43223e-35
Eps8	0.439867	9.40489	168.467	4.75303e-37	1.55099e-35
Ogdh	0.45308	9.59269	162.21	5.96405e-37	1.94391e-35
Vapb	0.494788	9.34105	223.894	6.00947e-37	1.95643e-35
Fah	0.440248	9.56176	162.061	6.42452e-37	2.08913e-35
Slc25a15	0.465196	9.36885	189.43	6.7873e-37	2.20453e-35
Galm	0.497012	9.29244	279.248	7.19645e-37	2.33472e-35
Slc25a19	0.505873	9.29812	272.479	7.39642e-37	2.39682e-35
Hint2	0.402662	10.1211	161.236	9.68532e-37	3.13224e-35
Rpl37a	0.282946	11.5159	161.235	9.68826e-37	3.13224e-35
Rdh10	0.483609	9.29328	277.593	9.92337e-37	3.20455e-35
Cdc37	0.499547	9.34546	220.836	1.06624e-36	3.43924e-35
Rps6	0.373097	10.6312	160.898	1.14551e-36	3.69069e-35
Defb29	0.413657	9.70706	160.736	1.24189e-36	3.99662e-35
Hcfc1r1	0.456887	9.49897	160.501	1.39529e-36	4.4851e-35
Zbp1	-0.79195	9.26562	380.775	1.44369e-36	4.63536e-35
Atxn1	0.493322	9.30541	245.197	1.47653e-36	4.7354e-35
Gemin7	0.454538	9.42659	163.124	2.63477e-36	8.44032e-35
Dennd5b	0.480081	9.35101	213.323	2.74731e-36	8.79075e-35
Mgat3	0.404816	9.24076	446.476	2.92763e-36	9.35707e-35
Socs3	-0.585011	9.23553	446.682	2.93377e-36	9.36598e-35
Wbp1	0.500822	9.3038	262.93	3.29246e-36	1.04991e-34
Lgals3	-0.717233	9.5088	158.679	3.45508e-36	1.10051e-34
1700011H14Rik	0.458346	9.53307	158.369	4.03113e-36	1.28254e-34
Slc2a2	0.397968	9.48237	158.064	4.69076e-36	1.49071e-34
St13	0.427023	9.75576	158.05	4.72332e-36	1.49936e-34
Msrb2	0.491369	9.24833	385.102	4.76443e-36	1.5107e-34
Ppdpf	0.444597	9.54535	157.837	5.25063e-36	1.66298e-34
Fam132a	0.437435	9.35956	203.693	6.41683e-36	2.03004e-34
Nagk	0.523124	9.29595	264.341	6.47983e-36	2.04766e-34
Mtch2	0.446867	9.54671	156.812	8.74494e-36	2.76032e-34
Tmem39b	0.441847	9.22497	548.992	9.05763e-36	2.8558e-34
Pfdn5	0.379383	10.0605	156.415	1.06532e-35	3.35509e-34
Mrpl43	0.476306	9.37853	189.297	1.12875e-35	3.55088e-34
Pcca	0.515207	9.31981	225.656	1.29857e-35	4.0805e-34
Cox20	0.434006	9.62244	155.793	1.45231e-35	4.5585e-34
Gm15883	0.478907	9.2907	260.384	1.47988e-35	4.63982e-34
Nav2	0.49659	9.27603	301.776	2.04721e-35	6.41139e-34
Cideb	0.449465	9.41589	169.96	2.64526e-35	8.27508e-34
Serpinb9	-0.646035	9.27366	259.549	2.70423e-35	8.45011e-34
Rnf181	0.397438	9.57799	154.197	3.2137e-35	1.00309e-33
Echs1	0.449319	9.56556	154.146	3.29573e-35	1.02755e-33
Ndufa9	0.459814	9.42226	159.272	3.58874e-35	1.11766e-33
Rilpl2	0.465904	9.29611	267.097	4.53007e-35	1.40925e-33
Bex4	0.519018	9.24009	377.274	4.5866e-35	1.42526e-33
Cpox	0.429843	9.35568	199.674	4.75525e-35	1.47603e-33
Ebf1	0.492595	9.21194	646.3	4.79156e-35	1.48565e-33
Fam20c	0.472361	9.24721	383.246	6.16537e-35	1.90949e-33
Ddrgk1	0.446067	9.51977	152.881	6.18768e-35	1.91428e-33
Ube2m	0.442519	9.40888	179.375	7.21006e-35	2.22812e-33
Srgn	-0.68066	9.40046	152.315	8.20049e-35	2.53139e-33
Ndufb8	0.346498	10.3325	151.543	1.20422e-34	3.71317e-33
Echdc3	0.463316	9.21869	579.608	1.22865e-34	3.78436e-33
Tinag	0.481183	9.35892	193.774	1.27867e-34	3.93408e-33
Airn	0.441114	9.23254	450.279	1.3614e-34	4.18403e-33
Mafg	0.468415	9.39247	178.49	1.49666e-34	4.59469e-33
Hes6	0.483852	9.32096	228.605	1.59495e-34	4.89108e-33
Sqrdl	0.497168	9.30138	240.628	1.60079e-34	4.90361e-33
Manba	0.460581	9.29953	263.04	1.63103e-34	4.99076e-33
Hdgf	0.427985	9.5356	150.838	1.71059e-34	5.22849e-33
Mrps26	0.444456	9.41907	164.934	2.06001e-34	6.28872e-33
Cox7a1	0.497135	9.3361	181.25	2.06195e-34	6.28872e-33
Pacsin2	0.474538	9.32122	226.334	2.19954e-34	6.70106e-33
Rpl15	0.390779	10.1366	150.097	2.4745e-34	7.53055e-33
Cyp2j11	0.439879	9.24753	372.176	2.4844e-34	7.55247e-33
Ldha	0.414409	9.88405	150.002	2.59347e-34	7.87547e-33
Htra1	0.480379	9.2946	255.671	2.60086e-34	7.88938e-33
Kdelr1	0.479131	9.35912	193.93	3.0244e-34	9.16421e-33
Rdx	0.428969	9.47185	149.647	3.09531e-34	9.36891e-33
Nit1	0.409957	9.41912	158.703	3.13114e-34	9.46714e-33
Shmt2	0.414091	9.3549	203.193	3.20618e-34	9.68357e-33
Rogdi	0.440068	9.36041	201.841	3.25702e-34	9.82653e-33
Tex264	0.484322	9.35643	201.236	3.29221e-34	9.922e-33
Minos1	0.343279	10.2761	149.355	3.57973e-34	1.07769e-32
Map7	0.459877	9.32182	225.706	3.83733e-34	1.154e-32
Tmem234	0.428786	9.47912	149.142	3.98014e-34	1.19567e-32
Parp14	-0.749555	9.29914	407.195	4.52644e-34	1.35832e-32
Dnajb9	-0.565837	9.36278	181.983	4.54147e-34	1.36137e-32
Rhbg	0.505702	9.24529	288.667	4.69059e-34	1.40457e-32
Hsd11b1	-0.654902	9.28765	254.361	4.71447e-34	1.41021e-32
Samsn1	-0.594345	9.23971	380.218	4.7979e-34	1.43363e-32
Xdh	-0.697242	9.2633	360.739	5.23744e-34	1.5633e-32
Sucnr1	0.386061	9.24946	373.927	5.39214e-34	1.60777e-32
Sptssa	0.43686	9.44362	152.016	5.49512e-34	1.63673e-32
Ndufs4	0.441442	9.56046	148.287	6.09334e-34	1.81298e-32
Ndufa7	0.327339	10.3585	148.176	6.43878e-34	1.91372e-32
Tmem14c	0.404438	9.51683	148.097	6.69699e-34	1.98836e-32
Nacc2	0.483269	9.256	342.23	6.85091e-34	2.0319e-32
Dlst	0.430092	9.42373	160.224	6.9346e-34	2.05455e-32
Cstb	-0.471986	9.926	147.873	7.48814e-34	2.2162e-32
Gimap1	0.506883	9.22791	454.64	7.82202e-34	2.31258e-32
Rab3il1	0.427465	9.22014	556.552	8.89678e-34	2.62755e-32
Slc25a23	0.482931	9.27671	287.308	9.30491e-34	2.74519e-32
Gsta4	0.508636	9.26273	249.851	1.17938e-33	3.47581e-32
Ugt3a1	0.447138	9.53616	146.723	1.32794e-33	3.90953e-32
Ptgr2	0.437002	9.35603	201.959	1.43559e-33	4.22203e-32
Cisd3	0.413189	9.55298	146.211	1.7138e-33	5.03495e-32
Rpl24	0.301383	10.7882	146.135	1.77984e-33	5.22347e-32
Oxld1	0.464103	9.24792	367.601	2.00529e-33	5.87895e-32
Apeh	0.45918	9.32431	210.756	2.01989e-33	5.91559e-32
Nampt	-0.535982	9.53455	145.818	2.08423e-33	6.09763e-32
Pttg1ip	0.425314	9.45612	145.446	2.50917e-33	7.33315e-32
Maf1	0.473565	9.35837	187.696	2.65942e-33	7.76417e-32
Eif3e	0.445751	9.47771	145.286	2.71735e-33	7.92504e-32
Ndufs7	0.390735	9.89707	145.035	3.07968e-33	8.97241e-32
Slfn2	-0.623619	9.28723	223.26	3.23197e-33	9.40632e-32
Sirt3	0.424161	9.38256	178.4	3.43608e-33	9.98998e-32
Bcl2a1a	-0.412963	9.20954	702.363	3.90853e-33	1.13518e-31
Dtx3	0.525303	9.26956	292.733	4.11468e-33	1.19381e-31
Cmip	0.407289	9.45382	144.432	4.15923e-33	1.20549e-31
Stat3	-0.607258	9.34384	197.423	7.53284e-33	2.18102e-31
Chd4	0.457409	9.37756	177.852	8.23754e-33	2.38259e-31
Scrn2	0.432826	9.33304	209.52	8.84933e-33	2.5569e-31
Anapc11	0.430497	9.462	142.895	8.94219e-33	2.58107e-31
Mxd4	0.48934	9.3229	205.418	9.31472e-33	2.68583e-31
Fpr1	-0.439188	9.2124	581.506	9.35787e-33	2.69549e-31
Ppt2	0.452253	9.32781	212.929	1.00857e-32	2.90215e-31
Hpn	0.419396	9.58812	142.576	1.04842e-32	3.01346e-31
Eps8l2	0.46566	9.36949	182.567	1.0494e-32	3.01346e-31
Psmd3	0.449185	9.38873	172.549	1.07007e-32	3.06967e-31
Cct5	0.469463	9.35269	183.97	1.17882e-32	3.37817e-31
Cpne4	0.449634	9.21701	551.562	1.23725e-32	3.54197e-31
Gm2a	0.400905	9.61314	142.201	1.26388e-32	3.61451e-31
Ndrg3	0.481078	9.27194	285.406	1.29321e-32	3.69461e-31
Slc29a3	0.463449	9.27874	273.545	1.50892e-32	4.30649e-31
Esm1	0.444255	9.21643	543.538	1.53408e-32	4.37384e-31
Coasy	0.454451	9.35617	175.7	1.67001e-32	4.75656e-31
Bnc2	0.446315	9.25902	314.55	1.76519e-32	5.02255e-31
Slc16a7	0.492592	9.28629	225.945	2.40153e-32	6.8262e-31
Mrps7	0.427316	9.42932	145.804	2.49206e-32	7.07633e-31
Pigr	-0.628242	9.32247	194.305	4.10768e-32	1.16522e-30
Larp1b	0.46497	9.34846	181.119	4.18159e-32	1.18498e-30
Faah	0.489918	9.26995	283.125	4.48672e-32	1.27016e-30
Tmem25	0.407006	9.23439	425.354	5.09716e-32	1.44152e-30
Apoo	0.479348	9.35257	167.932	5.62201e-32	1.58835e-30
PISD	0.431784	9.38078	174.308	6.04271e-32	1.70548e-30
Trim63	0.359429	9.30702	235.478	6.29203e-32	1.77406e-30
Dcaf8	0.443217	9.39045	162.688	6.59287e-32	1.85701e-30
Gstk1	0.484386	9.25818	305.669	6.77155e-32	1.90542e-30
Tuba4a	0.446005	9.38264	165.988	8.80466e-32	2.47503e-30
Commd1	0.454284	9.39329	156.15	8.86467e-32	2.4894e-30
2310036O22Rik	0.418102	9.55102	138.29	8.88384e-32	2.49228e-30
Tmbim6	0.362223	10.2529	138.185	9.35937e-32	2.62306e-30
Mettl23	0.463205	9.31816	208.386	9.79824e-32	2.74331e-30
Ppp1r16b	0.362756	9.33191	201.389	1.05154e-31	2.94116e-30
2020-09-01	0.487314	9.24752	321.616	1.07007e-31	2.99001e-30
Osbpl8	0.418749	9.36037	166.573	1.20493e-31	3.36346e-30
Pnn	0.464563	9.3496	184.929	1.4009e-31	3.90662e-30
Rab14	0.410124	9.58067	137.18	1.54523e-31	4.30481e-30
2810428I15Rik	0.420353	9.43569	141.786	1.6029e-31	4.46102e-30
Galnt11	0.396265	9.7605	137.093	1.61327e-31	4.48232e-30
Crip2	0.474017	9.29908	197.594	1.61375e-31	4.48232e-30
Tnrc6b	0.480731	9.30349	226.946	1.75267e-31	4.86335e-30
Vegfa	0.387819	9.43069	150.599	1.82669e-31	5.06372e-30
Clec4e	-0.45304	9.21557	595.454	1.85145e-31	5.1273e-30
Rpl34	0.317113	10.662	136.718	1.94516e-31	5.38148e-30
Hoxb5os	0.49917	9.27764	231.351	2.07041e-31	5.72235e-30
Etfb	0.352423	10.2602	136.238	2.47192e-31	6.82532e-30
Rps27	0.293733	11.4137	136.228	2.48427e-31	6.85267e-30
Cfl2	0.428967	9.42246	137.27	2.56392e-31	7.06542e-30
Uqcr10	0.267527	11.3738	135.777	3.10979e-31	8.56125e-30
Klk1	0.695476	10.8098	135.686	3.25465e-31	8.95124e-30
Ndufb4	0.323699	10.4318	135.659	3.29978e-31	9.06647e-30
Cox19	0.445583	9.34151	183.294	3.61089e-31	9.91155e-30
Them7	0.415662	9.42939	135.037	4.49969e-31	1.23391e-29
Cnpy2	0.424855	9.46816	134.979	4.63146e-31	1.2688e-29
Immt	0.418463	9.50309	134.866	4.90069e-31	1.34125e-29
Sec62	0.387788	9.82572	134.845	4.95028e-31	1.3535e-29
Ephx2	0.416355	9.49359	134.804	5.05379e-31	1.38045e-29
Gchfr	0.399952	9.38684	146.364	5.53614e-31	1.51073e-29
Fosl2	-0.577236	9.24749	352.34	6.30413e-31	1.71863e-29
Sox17	0.382256	9.20104	882.817	6.89462e-31	1.87778e-29
Rnf7	0.4099	9.55638	134.024	7.456e-31	2.0287e-29
Tst	0.387859	9.39335	156.105	7.55959e-31	2.05489e-29
Slc3a1	0.365665	9.41056	145.36	7.92665e-31	2.15257e-29
Gm37336	0.370474	9.20584	744.529	9.44551e-31	2.56255e-29
Iffo1	0.425069	9.2138	583.107	1.07141e-30	2.90391e-29
H3f3a	0.373502	10.1175	133.055	1.20932e-30	3.27453e-29
Nfyc	0.439975	9.27839	258.643	1.25144e-30	3.38528e-29
Ccl6	-0.854939	9.29135	205.569	1.30923e-30	3.53821e-29
C5ar1	-0.463974	9.21649	569.199	1.36084e-30	3.67413e-29
Tomm22	0.414357	9.44654	137.806	1.40727e-30	3.79584e-29
Clec4a1	-0.555172	9.226	451.499	1.61064e-30	4.34019e-29
Tceal8	0.438935	9.37906	141.174	1.9686e-30	5.29969e-29
Aspa	0.318202	9.52003	131.995	2.0528e-30	5.52107e-29
Bik	0.473235	9.24752	318.203	2.11769e-30	5.69013e-29
Taf10	0.384265	9.36619	180.671	2.29307e-30	6.15547e-29
Prdx6	0.392175	9.59391	131.638	2.45234e-30	6.57668e-29
S100a1	0.390201	10.2468	131.627	2.46618e-30	6.60747e-29
Tstd1	0.462921	9.26955	250.192	2.51636e-30	6.73546e-29
Ddit3	-0.56472	9.29552	219.981	2.61206e-30	6.98496e-29
Slc1a1	0.405185	9.41094	135.504	2.66394e-30	7.11688e-29
Spi1	-0.808415	9.28952	212.306	2.72262e-30	7.26673e-29
Rer1	0.413132	9.57059	131.087	3.22895e-30	8.60993e-29
Tsc1	0.429013	9.25498	319.419	3.3643e-30	8.96228e-29
Veph1	0.430649	9.23067	403.65	3.7637e-30	1.00167e-28
Arrdc3	0.432913	9.36569	151.246	3.81732e-30	1.01498e-28
Klf6	-0.578433	9.44162	133.437	3.83369e-30	1.01801e-28
Sypl2	0.396513	9.27	267.959	3.836e-30	1.01801e-28
Kcnj10	0.488996	9.26509	246.224	4.5894e-30	1.2168e-28
Tmsb10	-0.731092	10.2334	130.371	4.61679e-30	1.2229e-28
Dstn	0.402523	9.72931	130.154	5.1442e-30	1.36132e-28
Slc18a1	0.444787	9.34726	157.104	5.2858e-30	1.39747e-28
Dio1	0.441837	9.21898	488.486	5.36247e-30	1.4164e-28
Psme1	-0.534984	9.44016	129.938	5.73125e-30	1.51238e-28
Tmem8	0.417445	9.34794	179.386	5.79638e-30	1.52813e-28
Ly6a	-0.528536	10.6078	129.883	5.89062e-30	1.55151e-28
Gga2	0.442642	9.2674	275.696	7.15375e-30	1.88243e-28
Rab11fip5	0.461334	9.26958	261.87	7.21851e-30	1.89769e-28
0610030E20Rik	0.459	9.26175	285.885	7.88246e-30	2.07029e-28
Rps20	0.323656	10.472	129.141	8.5309e-30	2.2385e-28
Selenbp1	0.403115	9.74961	128.965	9.31402e-30	2.4417e-28
Knop1	0.464436	9.29189	223.625	1.06873e-29	2.7991e-28
Bend5	0.405753	9.24443	338.173	1.10093e-29	2.88073e-28
Ifrd1	-0.570881	9.29306	218.444	1.36508e-29	3.56857e-28
Tmem70	0.464812	9.33351	177.759	1.46004e-29	3.81327e-28
Fabp3	0.465453	9.49387	127.584	1.85576e-29	4.84228e-28
Gatsl2	0.381266	9.29091	231.959	2.18526e-29	5.69673e-28
Actb	-0.53904	11.332	127.176	2.27466e-29	5.92427e-28
Slc16a4	0.381749	9.29814	215.157	2.37076e-29	6.16883e-28
Ctsc	-0.643692	9.28579	195.68	2.43269e-29	6.3241e-28
Hsd17b10	0.410496	9.46563	126.966	2.52713e-29	6.56351e-28
Rpl36a	0.325347	10.3623	126.897	2.61533e-29	6.78628e-28
Tmppe	0.386049	9.22921	422.666	2.79259e-29	7.23952e-28
Polr2e	0.434232	9.35746	168.364	3.53149e-29	9.1466e-28
Glrx3	0.453967	9.33351	168.509	4.20853e-29	1.089e-27
Acad11	0.384238	9.35277	172.139	5.08896e-29	1.31561e-27
Sucla2	0.409075	9.44344	125.416	5.47978e-29	1.41534e-27
Swi5	0.388149	9.7247	125.378	5.58309e-29	1.44069e-27
Ldlrad3	0.426819	9.26002	282.345	5.94326e-29	1.53222e-27
Srr	0.397081	9.30102	208.806	6.7999e-29	1.75146e-27
Fggy	0.440402	9.3043	198.436	7.09122e-29	1.82482e-27
Ndufs3	0.401551	9.65964	124.888	7.13228e-29	1.8337e-27
Eif1b	0.446166	9.36328	156.463	7.31103e-29	1.87793e-27
Cs	0.432665	9.36807	154.69	8.47789e-29	2.17565e-27
Igbp1	0.464535	9.28976	218.214	9.08698e-29	2.32983e-27
Lamtor2	0.380011	9.75707	124.399	9.104e-29	2.33206e-27
Tesc	0.4561	9.26411	245.001	9.23398e-29	2.36319e-27
Slc22a2	0.371871	9.3225	179.131	9.32141e-29	2.38339e-27
Eif4b	0.404494	9.4193	131.658	1.23213e-28	3.14755e-27
Cbx1	0.448703	9.33792	173.727	1.24316e-28	3.17283e-27
Tpk1	0.428294	9.27693	227.368	1.27474e-28	3.25047e-27
Selm	0.462105	9.3578	147.875	1.30352e-28	3.32084e-27
Ccdc151	0.37616	9.20173	805.42	1.32658e-28	3.37652e-27
Tmem126a	0.393979	9.43246	125.734	1.38622e-28	3.52511e-27
Zkscan3	0.447997	9.31514	190.785	1.48751e-28	3.77924e-27
Atat1	0.424927	9.23253	375.343	1.50343e-28	3.81624e-27
Mocs2	0.38292	9.52519	123.375	1.51887e-28	3.85193e-27
Tmco1	0.401362	9.62082	123.341	1.54509e-28	3.91489e-27
Slc25a25	-0.644872	9.3506	171.505	1.60655e-28	4.06693e-27
Rgl1	0.382149	9.36004	151.515	1.86139e-28	4.70777e-27
Nxf1	0.406878	9.45059	124.222	1.88229e-28	4.75634e-27
Trib2	0.435877	9.25548	273.482	1.90706e-28	4.81459e-27
Fam210a	0.454027	9.2716	235.696	2.10539e-28	5.31052e-27
Acsm5	0.394962	9.23769	343.808	2.17272e-28	5.47541e-27
Fkbp8	0.376667	9.48577	123.856	2.62797e-28	6.61672e-27
Celsr2	0.449571	9.30028	200.261	2.71181e-28	6.82168e-27
Tmem147	0.391081	9.63087	122.21	2.71799e-28	6.83108e-27
Lpar3	0.4191	9.24931	298.695	2.80638e-28	7.04691e-27
Agtr1a	0.426164	9.22949	376.142	2.81155e-28	7.05356e-27
Ak4	0.25954	9.49516	122.078	2.90362e-28	7.27801e-27
Zfp503	0.398513	9.38423	146.863	2.90652e-28	7.27877e-27
Snhg20	0.441197	9.29865	213.613	2.99549e-28	7.49488e-27
2310061I04Rik	0.433759	9.31489	187.061	3.34154e-28	8.35325e-27
Pde6a	0.300691	9.19324	1372.89	3.39862e-28	8.48837e-27
Wbscr27	0.435435	9.23179	362.846	3.45941e-28	8.63248e-27
Irx3	0.426874	9.2803	213.044	3.48627e-28	8.69176e-27
Dnajc13	0.41594	9.31721	185.027	3.8566e-28	9.6065e-27
Mif4gd	0.437545	9.35571	158.757	3.87888e-28	9.65342e-27
Tomm20	0.351764	9.98405	121.237	4.42014e-28	1.09907e-26
Tfec	0.424098	9.25819	273.254	4.62567e-28	1.14915e-26
Smpd2	0.428781	9.28856	216.76	4.65634e-28	1.15575e-26
Mut	0.39825	9.41483	129.093	4.87617e-28	1.20924e-26
Slc9a3r2	0.406198	9.23698	302.046	5.61645e-28	1.39159e-26
Atp4a	0.449565	9.23026	347.062	5.65507e-28	1.39992e-26
Gm15879	0.383604	9.23081	343.839	5.71565e-28	1.41366e-26
Gamt	0.372889	9.2298	378.275	6.0645e-28	1.49862e-26
Sertad2	0.395629	9.28061	236.37	6.33477e-28	1.56403e-26
Cltb	0.396369	9.51234	120.416	6.6626e-28	1.64352e-26
Rsrp1	0.386318	9.95926	120.406	6.69686e-28	1.65052e-26
Polr2m	0.397264	9.42541	129.284	6.75322e-28	1.66294e-26
Anp32a	0.407604	9.47373	120.386	6.76333e-28	1.66397e-26
Fmo5	0.338304	9.27653	223.667	7.07668e-28	1.73953e-26
Mal	0.478593	9.46856	120.187	7.46908e-28	1.83438e-26
Upp1	-0.601763	9.27684	219.843	8.0431e-28	1.97363e-26
Rnf152	0.42778	9.28262	216.183	8.15788e-28	2.00004e-26
Hist1h1c	0.440109	9.35962	133.79	8.63218e-28	2.11447e-26
Kidins220	0.397701	9.39974	140.131	8.68395e-28	2.12529e-26
Mtdh	0.42742	9.37137	156.997	9.11699e-28	2.22932e-26
Gabarapl2	0.384459	9.66181	118.996	1.35475e-27	3.3098e-26
Kxd1	0.381112	9.42063	132.356	1.45845e-27	3.56004e-26
Agxt2	0.422095	9.30585	182.239	1.5521e-27	3.78534e-26
Palm3	0.366709	9.21094	584.347	1.55489e-27	3.78884e-26
Scd2	0.466219	9.34237	125.313	1.68536e-27	4.1032e-26
Rps18	0.280368	11.103	118.557	1.68726e-27	4.10425e-26
Creb3l2	0.437948	9.2569	269.887	1.76061e-27	4.27895e-26
Noct	-0.646577	9.28079	264.898	1.89051e-27	4.59068e-26
Pxmp2	0.344248	9.36163	155.774	2.13641e-27	5.1833e-26
Thy1	0.303912	9.21809	441.099	2.29393e-27	5.56065e-26
Glb1l	0.42831	9.27103	236.897	2.49669e-27	6.046e-26
Atpif1	0.30391	10.6719	117.772	2.49847e-27	6.046e-26
Kcnj16	0.392009	9.69306	117.623	2.69095e-27	6.50615e-26
Atp6v1f	0.335838	10.1461	117.6	2.72242e-27	6.57657e-26
Bcat2	0.443425	9.27694	225.436	2.76495e-27	6.67354e-26
Akr1b10	0.427491	9.23714	331.919	2.88264e-27	6.95161e-26
Atp6v1b2	0.404327	9.56095	117.341	3.09926e-27	7.46757e-26
Pura	0.387049	9.46953	117.315	3.1403e-27	7.55994e-26
Dnajc30	0.436974	9.3008	194.407	3.28169e-27	7.89353e-26
Camk2n1	0.379957	9.59964	117.221	3.29101e-27	7.90915e-26
Snap47	0.449542	9.24766	279.621	3.32018e-27	7.97242e-26
Tspan33	0.391575	9.28153	234.679	3.57561e-27	8.57839e-26
Herpud1	-0.474078	9.64457	116.977	3.71678e-27	8.90946e-26
Fam173a	0.437175	9.34935	158.463	3.87362e-27	9.27746e-26
Rsad2	-0.815972	9.81998	125.804	4.62414e-27	1.10655e-25
Eif4ebp3	-0.484616	9.21602	594.91	4.69416e-27	1.12235e-25
Fbxo21	0.42207	9.24356	307.093	4.94617e-27	1.18159e-25
Ndufa11	0.347508	9.96585	116.032	5.96467e-27	1.42369e-25
Degs2	0.425568	9.24817	279.295	6.48574e-27	1.54674e-25
Mrpl41	0.414793	9.37072	129.368	6.51164e-27	1.5516e-25
Traf4	0.418585	9.28204	217.622	6.64006e-27	1.58085e-25
Cyhr1	0.407302	9.35426	161.752	7.0265e-27	1.67144e-25
Crocc	0.339557	9.22874	390.811	7.25561e-27	1.72447e-25
Ms4a6c	-0.585491	9.25428	213.967	7.46006e-27	1.77156e-25
Ndel1	0.367445	9.35599	152.431	7.46852e-27	1.77206e-25
Cxcr6	0.382382	9.19642	960.323	7.57378e-27	1.79552e-25
Tmem108	0.412828	9.21364	505.678	7.79496e-27	1.84639e-25
Mtx2	0.417524	9.37198	135.123	7.88801e-27	1.86685e-25
Psme2	-0.495451	9.50495	115.417	8.11208e-27	1.91826e-25
Gstt3	0.448332	9.28791	200.481	8.50443e-27	2.00934e-25
Fuca2	0.38881	9.47279	115.236	8.87976e-27	2.09625e-25
Rpl36al	0.309521	10.2953	115.164	9.20411e-27	2.17099e-25
Nccrp1	0.283417	9.23261	322.664	9.25993e-27	2.18232e-25
Cldn8	0.428996	9.33638	132.617	1.05001e-26	2.4725e-25
Gas1	0.399802	9.25382	269.377	1.06607e-26	2.50822e-25
Prps2	0.452872	9.27648	213.993	1.15364e-26	2.71198e-25
Gm15441	-0.597792	9.25728	284.839	1.27054e-26	2.98427e-25
Thra	0.414187	9.25523	268.059	1.33083e-26	3.12327e-25
Ccng1	0.383628	9.38882	119.725	1.36598e-26	3.20307e-25
Sirt2	0.424996	9.29346	198.046	1.38314e-26	3.24059e-25
Josd2	0.442061	9.28807	200.209	1.66645e-26	3.90111e-25
Alkbh7	0.437527	9.25948	245.664	1.9091e-26	4.4654e-25
Arl3	0.430555	9.35546	143.916	1.93524e-26	4.52277e-25
Atp1a1	0.391194	10.9162	113.583	2.02955e-26	4.73922e-25
Pitpnc1	0.399513	9.31956	169.041	2.03432e-26	4.74641e-25
Gng11	0.461433	9.25545	219.67	2.08038e-26	4.84983e-25
Ptprk	0.422325	9.30441	186.586	2.19822e-26	5.12029e-25
4933434E20Rik	0.412411	9.3575	147.517	2.33097e-26	5.42498e-25
Cgref1	0.360684	9.44506	113.172	2.4935e-26	5.79842e-25
Dbt	0.414597	9.30214	182.167	2.60585e-26	6.05466e-25
Commd3	0.387348	9.44382	113.07	2.62333e-26	6.09021e-25
Emcn	0.411131	9.26358	196.943	2.7091e-26	6.28413e-25
Pim1	-0.544439	9.28282	185.534	2.88981e-26	6.69776e-25
Etv1	0.400882	9.28294	200.347	2.9064e-26	6.73064e-25
Lurap1l	0.411813	9.23319	323.868	2.95503e-26	6.83759e-25
Dnmt3a	0.423114	9.25987	254.512	3.05462e-26	7.0622e-25
Anapc5	0.398433	9.37598	144.476	3.08446e-26	7.12531e-25
Mccc2	0.45323	9.26171	238.943	3.16864e-26	7.31373e-25
Prkaa2	0.357341	9.42241	115.83	3.94574e-26	9.0999e-25
Prom1	0.440452	9.29117	185.519	3.96537e-26	9.13766e-25
Xpr1	0.401843	9.339	154.976	4.13866e-26	9.52913e-25
Mark2	0.415912	9.32179	170.078	4.20661e-26	9.67762e-25
2210016L21Rik	0.44287	9.28938	199.042	5.06287e-26	1.1638e-24
Tmem94	0.42527	9.23908	307.591	5.38301e-26	1.23637e-24
Ifi47	-0.804049	9.32246	234.65	5.39009e-26	1.23698e-24
Ndufb7	0.316032	10.0553	111.602	5.47063e-26	1.25444e-24
Aifm1	0.44652	9.28919	195.435	5.66778e-26	1.29858e-24
Cit	0.317021	9.21982	431.143	5.83934e-26	1.33679e-24
Nuak2	0.380531	9.44633	111.446	5.91314e-26	1.35258e-24
Rps27rt	0.374775	9.76219	111.331	6.26407e-26	1.43169e-24
Rnf213	-0.717803	9.33226	239.29	6.30293e-26	1.43939e-24
Fastk	0.410863	9.33794	158.801	6.46644e-26	1.47553e-24
Mrps5	0.414891	9.31613	169.47	6.53501e-26	1.48996e-24
Baiap2l2	0.362854	9.30553	191.657	6.54914e-26	1.49197e-24
Ecsit	0.402395	9.29128	201.495	6.69443e-26	1.52383e-24
Idh3a	0.388908	9.39511	128.582	7.31437e-26	1.66359e-24
Fbxo22	0.41757	9.30997	171.722	7.63495e-26	1.73509e-24
Lilrb4a	-0.448089	9.21483	495.124	7.97528e-26	1.81096e-24
Birc3	-0.536558	9.24103	341.472	8.86799e-26	2.01204e-24
Hist3h2a	0.445224	9.26443	229.297	9.03641e-26	2.04859e-24
S100a11	-0.509406	9.9379	110.588	9.08336e-26	2.05757e-24
Oasl2	-0.659313	9.26157	282.906	9.47636e-26	2.14486e-24
C330006A16Rik	0.406551	9.30279	184.457	9.60298e-26	2.17176e-24
Ankrd33b	0.415789	9.29464	190.799	9.84364e-26	2.22439e-24
Lzts3	0.323091	9.24344	307.145	1.04921e-25	2.36901e-24
H2-Q4	-0.568829	9.29314	197.802	1.27689e-25	2.88076e-24
Mtfr1l	0.386305	9.36729	138.336	1.34655e-25	3.03548e-24
Mfsd1	0.384495	9.42776	109.778	1.36281e-25	3.06968e-24
Gigyf1	0.433023	9.24761	273.586	1.45159e-25	3.26702e-24
Gss	0.336887	9.45363	109.605	1.48587e-25	3.34148e-24
Zfp512	0.422115	9.23075	333.822	1.65751e-25	3.72448e-24
Cul9	0.416859	9.25286	251.527	1.7181e-25	3.85752e-24
Agpat3	0.345439	9.47636	109.281	1.74778e-25	3.92102e-24
Babam1	0.399243	9.3504	144.81	1.80228e-25	4.04004e-24
Mrps12	0.380547	9.49385	109.154	1.86243e-25	4.17155e-24
Sumo3	0.40214	9.37066	130.486	2.09885e-25	4.69733e-24
Gm853	0.309916	9.20928	468.599	2.17876e-25	4.87228e-24
H2-Ob	0.218351	9.18598	3468.78	2.23868e-25	5.00227e-24
Vps8	0.375742	9.22904	339.149	2.35898e-25	5.26688e-24
Nnt	0.423613	9.32041	160.635	2.43296e-25	5.42772e-24
Fam149a	0.421767	9.24524	267.609	2.55657e-25	5.69896e-24
Fgf1	0.34029	9.33173	146.786	2.59645e-25	5.78325e-24
Sf3b2	0.414469	9.34389	146.101	2.72094e-25	6.05571e-24
Asb9	0.422158	9.28566	182.943	2.82675e-25	6.28621e-24
Cd274	-0.586116	9.24145	396.956	2.85038e-25	6.33372e-24
Fam53b	0.406888	9.23105	337.812	2.96463e-25	6.58236e-24
Ccl5	-0.769425	9.85812	108.148	3.08236e-25	6.83834e-24
Marcks	-0.537141	9.2579	208.515	3.18102e-25	7.05163e-24
Fam92a	0.437799	9.24214	276.349	3.62056e-25	8.01966e-24
Ugt2b38	0.409868	9.84978	107.82	3.63147e-25	8.03746e-24
Slc22a22	0.33559	9.25771	248.138	3.89004e-25	8.60295e-24
Aldh1l1	0.38902	9.48155	107.662	3.93076e-25	8.68614e-24
Wdfy3	0.402484	9.34548	149.824	4.07835e-25	9.00517e-24
Zfp101	0.369138	9.22132	400.199	4.52882e-25	9.99196e-24
Use1	0.363647	9.44674	112.785	4.77419e-25	1.0525e-23
Rpl37	0.241151	11.2638	107.257	4.8151e-25	1.06069e-23
Meis2	0.429673	9.226	325.247	5.21084e-25	1.14696e-23
Usf2	0.412005	9.30382	175.523	5.55308e-25	1.22133e-23
Tifa	-0.565398	9.24914	299.755	5.60358e-25	1.23147e-23
Papss1	0.430649	9.30071	167.808	5.83168e-25	1.28059e-23
Trpm7	0.391093	9.38517	126.89	5.94613e-25	1.3047e-23
Sox9	-0.553527	9.23197	386.827	6.73264e-25	1.47612e-23
Scpep1	0.431707	9.29364	182.56	6.76305e-25	1.48163e-23
Zmym1	0.350426	9.19913	798.032	6.98166e-25	1.52832e-23
Mmp8	-0.370954	9.20799	574.392	7.11519e-25	1.55634e-23
Irg1	-0.303818	9.201	676.399	8.20356e-25	1.793e-23
Sod1	0.372669	9.72532	106.184	8.23858e-25	1.79925e-23
Arhgef10l	0.41878	9.24519	263.832	8.28423e-25	1.80781e-23
Coq2	0.419343	9.31279	160.531	8.56967e-25	1.86864e-23
Tacc2	-0.476684	9.44525	110.373	8.69561e-25	1.89463e-23
Sp5	0.304431	9.22286	398.742	9.16393e-25	1.99512e-23
Foxp1	0.425719	9.28181	192.419	1.07973e-24	2.34889e-23
Commd8	0.428722	9.28586	188.055	1.08457e-24	2.35759e-23
Jtb	0.364951	9.44211	105.633	1.08566e-24	2.35813e-23
Oxa1l	0.409713	9.27291	212.753	1.10165e-24	2.39101e-23
Chmp1a	0.411014	9.31222	166.408	1.1122e-24	2.41202e-23
Letm1	0.412571	9.34843	136.463	1.23704e-24	2.6807e-23
Sprr1a	0.255998	9.24526	200.843	1.29384e-24	2.80161e-23
St8sia1	0.32707	9.27348	211.444	1.33375e-24	2.88581e-23
Acadsb	0.438481	9.33154	140.32	1.38494e-24	2.99425e-23
Sdpr	0.388006	9.2247	351.112	1.41823e-24	3.06386e-23
Rmnd1	0.372998	9.26576	221.816	1.42897e-24	3.08467e-23
Slc22a23	0.409409	9.24292	271.571	1.62049e-24	3.49541e-23
Cd3d	0.422562	9.21212	424.07	1.90794e-24	4.11229e-23
Polr3e	-0.484575	9.60798	104.466	1.94851e-24	4.19649e-23
Ddc	0.397684	9.31895	152.604	2.00007e-24	4.30422e-23
Ttc3	0.416902	9.25215	240.245	2.02133e-24	4.34665e-23
Renbp	0.423919	9.28321	185.842	2.15028e-24	4.62037e-23
Phb	0.373369	9.473	104.242	2.17987e-24	4.68037e-23
Sys1	0.378784	9.3962	120.612	2.34875e-24	5.03909e-23
Rbmx	0.402517	9.26463	223.434	2.35966e-24	5.05864e-23
Hdc	-0.358697	9.20701	588.161	2.63751e-24	5.64997e-23
Hnf1b	0.361276	9.33869	146.626	2.68401e-24	5.74518e-23
Xpnpep1	0.383414	9.31219	161.702	2.7849e-24	5.95658e-23
Rps12-ps3	0.375168	9.42701	111.482	2.87709e-24	6.14908e-23
Nap1l5	0.320266	9.19675	847.549	3.11007e-24	6.64193e-23
Stat1	-0.595834	9.31075	187.192	3.24558e-24	6.92606e-23
Srsf2	0.355731	9.81182	103.366	3.38091e-24	7.20935e-23
Ppt1	0.428699	9.30031	173.224	3.47258e-24	7.39918e-23
Ggact	0.409762	9.29416	169.913	3.52851e-24	7.51265e-23
Camp	-0.470061	9.21963	351.639	3.55774e-24	7.56912e-23
Eif5a	0.333702	9.91248	102.879	4.31431e-24	9.17175e-23
Mapk8ip1	0.383284	9.22435	348.244	4.35334e-24	9.24771e-23
Acsm3	0.322617	9.43764	102.804	4.47961e-24	9.50873e-23
Acox3	0.317911	9.4131	112.266	4.67621e-24	9.91852e-23
Dnaja3	0.405974	9.31829	154.377	4.67996e-24	9.91896e-23
Ndufa2	0.242649	10.8436	102.704	4.71086e-24	9.97691e-23
Ssbp1	0.423213	9.33071	144.786	5.0051e-24	1.0592e-22
Bid	0.394743	9.30748	158.191	5.04349e-24	1.06652e-22
Syne4	0.392613	9.30817	165.222	5.06206e-24	1.06964e-22
Nr3c1	0.396691	9.29966	168.342	5.10944e-24	1.07884e-22
Card10	0.375088	9.24229	273.652	5.21275e-24	1.09982e-22
Tob1	0.37189	9.51085	102.497	5.22515e-24	1.10161e-22
Glod5	0.382456	9.34147	139.683	5.62319e-24	1.18464e-22
4921539H07Rik	0.285582	9.19699	911.553	5.82839e-24	1.22694e-22
Mecom	0.415952	9.31224	140.604	5.93455e-24	1.24835e-22
Uap1l1	0.407907	9.31749	149.524	6.06144e-24	1.27408e-22
Mrpl51	0.350329	9.65384	102.121	6.30836e-24	1.32499e-22
Spns1	0.397548	9.24668	256.405	6.69331e-24	1.40479e-22
Zfp579	0.398237	9.22113	379.044	7.22246e-24	1.51472e-22
Osbpl3	0.368558	9.34396	138.401	7.23862e-24	1.51697e-22
Gatad1	0.33994	9.43962	104.98	7.95407e-24	1.66566e-22
Afg3l1	0.396523	9.2827	191.052	8.27614e-24	1.7318e-22
Gm5483	-0.72814	9.25506	215.253	8.30429e-24	1.7364e-22
Dbi	-0.334748	11.8108	101.552	8.38934e-24	1.75287e-22
Irf1	-0.612053	9.27333	236.998	8.7204e-24	1.82068e-22
Wls	0.377221	9.52771	101.31	9.47295e-24	1.97633e-22
Hebp1	0.326621	9.41863	108.055	1.08588e-23	2.26377e-22
1190007I07Rik	0.397957	9.29482	172.938	1.12604e-23	2.34576e-22
Smdt1	0.285044	10.2148	100.95	1.13466e-23	2.36195e-22
Ces1g	0.323928	9.19808	751.874	1.34203e-23	2.79154e-22
Ush1c	0.392657	9.28826	183.784	1.39373e-23	2.89692e-22
Pkhd1	0.351814	9.3614	133.024	1.43092e-23	2.97202e-22
Med25	0.411642	9.28881	177.912	1.44292e-23	2.99472e-22
Ppp2r3a	0.377377	9.35773	129.852	1.44534e-23	2.99752e-22
Cbx6	0.416635	9.25512	222.999	1.5504e-23	3.21304e-22
Gm10116	-0.394054	10.197	100.251	1.61041e-23	3.33494e-22
Phlda2	0.332407	9.26308	213.586	1.61619e-23	3.34443e-22
Timm8b	0.328248	9.87976	100.15	1.69441e-23	3.5037e-22
Flrt1	0.285192	9.25266	252.675	2.01028e-23	4.1538e-22
Acbd6	0.41561	9.30318	158.351	2.25496e-23	4.65592e-22
Rap1gap	0.366308	9.26797	199.414	2.29937e-23	4.74412e-22
Rfng	0.368287	9.23886	283.557	2.3636e-23	4.87305e-22
Chmp4b	-0.443026	9.51069	99.4645	2.38913e-23	4.92207e-22
Cd209a	0.168863	9.18876	1268.65	2.61145e-23	5.37613e-22
Nabp2	0.390755	9.30174	168.896	2.72192e-23	5.59943e-22
Gm26697	0.345519	9.20049	695.163	2.78068e-23	5.71611e-22
H3f3b	-0.337795	10.5834	99.1322	2.82227e-23	5.79736e-22
Galnt14	0.314826	9.26947	208.188	3.09861e-23	6.36033e-22
Cldn5	0.289727	9.21504	382.275	3.15922e-23	6.47998e-22
Fam107b	0.371543	9.33417	138.633	3.19047e-23	6.5393e-22
Nfs1	0.404911	9.34472	131.363	3.19654e-23	6.54693e-22
Itgb6	0.3798	9.38484	112.362	3.33187e-23	6.81913e-22
Slc6a8	0.364466	9.39566	112.559	3.42308e-23	7.00068e-22
Hist1h4h	0.404829	9.24816	219.285	3.42762e-23	7.00485e-22
Fars2	0.402448	9.27511	184.914	3.539e-23	7.2272e-22
Hmgcl	0.392921	9.34233	125.531	4.70468e-23	9.6007e-22
Btf3	0.333186	9.88532	98.0995	4.73676e-23	9.65912e-22
Plscr4	0.360344	9.22375	342.103	4.85762e-23	9.89836e-22
St6galnac2	0.377278	9.33813	134.123	4.88672e-23	9.95044e-22
5033430I15Rik	0.319883	9.19741	775.401	4.99915e-23	1.0172e-21
Gm44386	0.353436	9.4043	113.996	5.60546e-23	1.13974e-21
Ube2e1	0.362384	9.42972	98.7859	5.9498e-23	1.20887e-21
Gm4208	0.24529	9.24755	195.605	6.31482e-23	1.2821e-21
Cd27	0.357875	9.2631	212.555	7.28158e-23	1.47732e-21
Smpd1	0.41073	9.27786	188.858	7.45886e-23	1.51219e-21
Stub1	0.35205	9.46243	101.533	7.66873e-23	1.55361e-21
Ghitm	0.343255	9.77527	97.0891	7.86255e-23	1.59173e-21
Tmem120a	0.352135	9.36356	119.627	8.47865e-23	1.71521e-21
Gucd1	0.376068	9.31587	145.74	8.70661e-23	1.76005e-21
Ak1	0.374783	9.22267	340.043	8.71652e-23	1.76079e-21
Snta1	0.352865	9.25551	228.828	8.98205e-23	1.81312e-21
Gadd45a	-0.501895	9.33111	135.393	9.15651e-23	1.847e-21
Ddx17	0.353146	9.45369	98.2868	9.16808e-23	1.848e-21
Tmem116	0.383956	9.29435	171.309	9.7263e-23	1.95911e-21
Sod2	0.312791	10.1145	96.6379	9.85942e-23	1.9845e-21
Herc6	-0.613321	9.26059	315.984	1.01763e-22	2.04681e-21
Hsbp1	0.341525	9.71308	96.5459	1.0325e-22	2.07524e-21
Gprc5c	0.378538	9.35823	129.441	1.0811e-22	2.17134e-21
Aktip	0.369025	9.39654	107.863	1.08194e-22	2.17148e-21
Gle1	0.388836	9.25369	229.461	1.16847e-22	2.34347e-21
Atp6v0e2	0.39461	9.22272	333.258	1.17778e-22	2.36044e-21
Snx6	0.37666	9.3634	120.43	1.28483e-22	2.57315e-21
Efhd2	-0.510882	9.27703	168.657	1.29345e-22	2.58856e-21
Stard8	0.37438	9.27234	191.896	1.33207e-22	2.66394e-21
Mansc4	0.286492	9.20068	685.461	1.35022e-22	2.69833e-21
Hook2	0.395028	9.2576	210.041	1.38917e-22	2.77418e-21
Uvssa	0.400422	9.26066	210.302	1.46416e-22	2.92185e-21
Numa1	0.40864	9.27497	181.54	1.47158e-22	2.93457e-21
Gtf3a	0.369629	9.3046	158.226	1.47846e-22	2.94619e-21
Pi4ka	0.399329	9.29491	159.04	1.51276e-22	3.0124e-21
Paip2	0.353647	9.58475	95.7558	1.5347e-22	3.05391e-21
Kansl3	0.377704	9.2848	178.71	1.66758e-22	3.31598e-21
0610012G03Rik	0.32729	9.67825	95.5523	1.69971e-22	3.37746e-21
Txndc15	0.408077	9.30862	151.551	1.74569e-22	3.46637e-21
Uroc1	0.401185	9.22352	315.213	1.75016e-22	3.47278e-21
Vgll4	0.379016	9.23043	297.48	1.76742e-22	3.50454e-21
Srek1ip1	0.393348	9.30683	152.435	1.82359e-22	3.61337e-21
Nol7	0.376548	9.36769	118.018	1.85646e-22	3.6759e-21
Gclc	-0.436187	9.53103	95.2211	2.00697e-22	3.97111e-21
Erp29	0.348523	9.4472	102.043	2.03674e-22	4.02716e-21
Mettl1	0.372962	9.29409	165.382	2.05738e-22	4.06511e-21
Smtn	0.348259	9.25748	223.21	2.09014e-22	4.12692e-21
Mep1a	0.399009	9.79523	95.0509	2.18586e-22	4.31288e-21
Tulp3	0.371853	9.25086	223.774	2.19449e-22	4.32686e-21
Ppif	0.375176	9.25702	218.127	2.23235e-22	4.39841e-21
Cep19	0.386897	9.24371	242.105	2.25719e-22	4.44422e-21
Ccl4	-0.749193	9.412	94.9747	2.27108e-22	4.46843e-21
Xpa	0.410283	9.24294	238.506	2.30899e-22	4.53982e-21
Dusp6	0.388698	9.26247	201.162	2.39388e-22	4.70343e-21
Ppp1ca	0.342464	9.65646	94.7812	2.50268e-22	4.91374e-21
Vcp	0.350086	9.55326	94.6889	2.62121e-22	5.14287e-21
Safb2	0.392727	9.30451	155.014	2.66759e-22	5.23019e-21
Akt1s1	0.397297	9.29826	157.007	2.93387e-22	5.74825e-21
Comt	0.34695	9.95294	94.4254	2.99176e-22	5.85757e-21
Dleu7	0.319081	9.27485	190.142	3.08731e-22	6.04043e-21
Mapre2	0.402129	9.27458	186.957	3.23748e-22	6.32981e-21
Cth	0.242166	9.3784	115.495	3.40208e-22	6.64699e-21
Slc12a7	0.344247	9.3009	162.068	3.41251e-22	6.66272e-21
Snhg12	0.393024	9.26803	191.132	3.53372e-22	6.89457e-21
Arhgef28	0.396563	9.29676	157.21	3.64885e-22	7.11425e-21
Scly	0.366146	9.3109	148.932	4.29996e-22	8.37789e-21
Plekhm2	0.38504	9.24791	226.572	4.54711e-22	8.85326e-21
Rpl41	0.197131	12.2954	93.5409	4.66358e-22	9.07373e-21
S100a10	-0.427968	9.70129	93.2461	5.40721e-22	1.05133e-20
Ubac2	0.397334	9.27639	183.107	5.48121e-22	1.06498e-20
Jun	0.427772	9.65677	93.174	5.60633e-22	1.08853e-20
Ppp1r1b	0.315753	9.2416	231.867	5.80447e-22	1.12622e-20
Mpp6	0.347915	9.34348	125.438	6.10841e-22	1.18437e-20
Magi2	0.383314	9.23024	284.945	6.34319e-22	1.22904e-20
Snx8	0.354922	9.262	201.972	6.47967e-22	1.25462e-20
Gk	0.253131	9.93437	92.6633	7.24471e-22	1.40178e-20
Mrpl16	0.40585	9.27933	166.845	8.22697e-22	1.59074e-20
Ptprf	0.379554	9.36903	112.492	8.32192e-22	1.60799e-20
Tspo	-0.412796	9.7583	92.3549	8.45756e-22	1.63307e-20
Plvap	0.326074	9.32135	99.8388	8.54799e-22	1.64939e-20
Ptprb	0.328247	9.20692	487.573	8.78509e-22	1.69397e-20
Ube2s	-0.41209	9.4657	92.2376	8.97032e-22	1.7285e-20
Prr5	0.388463	9.29454	149.503	9.22647e-22	1.77664e-20
Stra13	0.326162	9.6288	92.1322	9.45805e-22	1.81998e-20
Cat	0.346055	10.0772	92.0245	9.98356e-22	1.91978e-20
Ece1	0.386532	9.24016	245.113	1.01097e-21	1.9427e-20
Cwh43	0.340041	9.25435	193.768	1.02223e-21	1.96299e-20
Coa6	0.30304	9.44476	93.7057	1.07275e-21	2.05859e-20
Bcl3	-0.484309	9.24026	271.978	1.07585e-21	2.06312e-20
Exoc3l2	0.259531	9.19568	783.699	1.12016e-21	2.14662e-20
Fkbp3	0.381227	9.36944	108.656	1.21392e-21	2.32471e-20
Aup1	0.350566	9.41211	103.199	1.22843e-21	2.35089e-20
Arhgap10	0.358094	9.24314	240.865	1.23056e-21	2.35336e-20
Sec13	0.39869	9.31232	137.697	1.28036e-21	2.44692e-20
Ctsh	0.355675	9.44912	91.4891	1.30622e-21	2.49465e-20
Lrrk2	0.303733	9.31531	147.105	1.33791e-21	2.55343e-20
Sema4d	0.356308	9.26304	198.852	1.34655e-21	2.56818e-20
Mcl1	-0.423994	9.4035	98.2809	1.45858e-21	2.77994e-20
Dgkz	0.364646	9.23659	258.586	1.47926e-21	2.81743e-20
Slc13a1	-0.451728	9.89466	91.1842	1.52232e-21	2.89748e-20
Fosb	0.375648	9.26175	164.311	1.62155e-21	3.08426e-20
Hax1	0.368153	9.36651	109.79	1.70274e-21	3.23648e-20
Gm29417	0.215893	9.18846	1990.03	1.85878e-21	3.53067e-20
Mrps23	0.385737	9.31001	143.476	1.87467e-21	3.55843e-20
Mcemp1	-0.387192	9.21203	437.717	1.92195e-21	3.64571e-20
Slc20a1	-0.464821	9.26315	188.919	2.01585e-21	3.82125e-20
Fam162a	0.35285	9.4144	98.3638	2.14934e-21	4.07153e-20
Lztr1	0.369467	9.27165	180.24	2.17501e-21	4.11737e-20
Hnf1aos1	0.32687	9.23537	260.741	2.27437e-21	4.30255e-20
Arhgef1	0.365663	9.26878	193.415	2.35654e-21	4.45499e-20
Slc16a12	0.354516	9.33933	122.114	2.41489e-21	4.56221e-20
C1qtnf3	0.313265	9.24029	237.057	2.46604e-21	4.65571e-20
Cisd2	0.349869	9.49414	90.1517	2.55668e-21	4.82358e-20
Nmi	-0.546971	9.27692	190.089	2.67318e-21	5.03997e-20
Cd44	-0.476715	9.23181	262.487	2.77545e-21	5.22927e-20
Akap12	-0.559067	9.23196	308.246	2.86375e-21	5.39201e-20
Eif6	-0.403043	9.51621	89.7844	3.07448e-21	5.78489e-20
Wipi2	0.38664	9.32277	129.067	3.28385e-21	6.17469e-20
AI480526	0.336363	9.24916	231.11	3.53325e-21	6.6392e-20
Mkln1	0.36364	9.38598	110.608	3.59576e-21	6.75212e-20
Tfam	0.379872	9.26834	183.476	3.64249e-21	6.83528e-20
Lima1	0.367105	9.32308	130.999	3.78327e-21	7.09472e-20
Acsl4	-0.475348	9.304	141.372	4.48415e-21	8.40343e-20
Bcl11b	0.293398	9.21763	362.844	4.57423e-21	8.5665e-20
Sdr39u1	0.383235	9.25406	202.987	4.78436e-21	8.95404e-20
Ifih1	-0.507474	9.24395	278.49	5.11097e-21	9.55892e-20
Nepn	0.265841	9.20606	505.472	5.19106e-21	9.70222e-20
Smg6	0.359616	9.232	272.261	5.44495e-21	1.017e-19
Zfp36l1	-0.422883	9.7164	88.6151	5.53159e-21	1.03249e-19
Arpc1b	-0.524478	9.46817	88.5977	5.58016e-21	1.04086e-19
Mrpl9	0.385966	9.24959	209.85	5.63177e-21	1.04979e-19
Myo6	0.3324	9.5383	88.5468	5.72455e-21	1.06637e-19
Jkamp	0.3928	9.27626	170.025	6.00318e-21	1.11753e-19
Bicc1	0.334296	9.41798	93.6826	6.39519e-21	1.18972e-19
Tmem242	0.367531	9.35777	114.443	6.72039e-21	1.24939e-19
Galk2	0.401373	9.2616	187.913	6.76361e-21	1.25659e-19
Tomm40	0.371613	9.30109	152.42	6.79818e-21	1.26217e-19
Gdf15	-0.514866	9.27515	154.648	7.62649e-21	1.41502e-19
Plek	-0.461012	9.22347	318.809	7.65462e-21	1.4193e-19
Slfn4	-0.412753	9.21371	476.704	8.77007e-21	1.62505e-19
Mlycd	0.364169	9.26998	176.253	8.94892e-21	1.65709e-19
Naa38	0.33421	9.59651	87.628	9.08294e-21	1.68079e-19
Ttyh2	0.341341	9.2675	182.121	9.2298e-21	1.70684e-19
Isyna1	0.386059	9.23787	238.343	9.29626e-21	1.718e-19
Gbas	0.39	9.31749	132.395	9.30986e-21	1.71938e-19
Chka	0.34529	9.46892	87.5755	9.32564e-21	1.72116e-19
Ap2s1	0.339286	9.45842	90.3558	9.68177e-21	1.78571e-19
Sgsm2	0.37448	9.24193	229.309	1.04212e-20	1.92082e-19
Dld	0.344727	9.42501	90.0891	1.04941e-20	1.93298e-19
Gpd1	0.249716	9.54363	87.2307	1.10895e-20	2.04132e-19
Mrps16	0.336776	9.49218	87.2197	1.11514e-20	2.05135e-19
Acat3	-0.483444	9.23925	256.28	1.22139e-20	2.24535e-19
Agps	0.295402	9.36177	102.253	1.30114e-20	2.39037e-19
Uros	0.34847	9.21461	359.452	1.41552e-20	2.59879e-19
AI317395	0.313418	9.32362	128.471	1.55676e-20	2.85623e-19
Usp2	0.25667	9.42729	100.262	1.57422e-20	2.88638e-19
Rab7	0.331789	9.5806	86.5156	1.58851e-20	2.91067e-19
Tfpi2	0.366065	9.25286	189.845	1.81825e-20	3.32945e-19
Gipc2	0.340542	9.48046	86.1173	1.94053e-20	3.55104e-19
Chadl	0.272271	9.19998	631.55	1.9514e-20	3.5686e-19
Fam134b	-0.39711	9.5444	86.0164	2.04144e-20	3.73083e-19
Ly6c2	-0.563716	9.29154	108.216	2.06164e-20	3.76528e-19
Hexim1	0.365368	9.29455	143.787	2.10722e-20	3.84602e-19
Aprt	0.31708	9.48949	86.2758	2.11915e-20	3.86527e-19
Chil3	-0.888923	9.27599	144.592	2.12797e-20	3.87794e-19
Mob3b	0.349997	9.25369	201.164	2.12886e-20	3.87794e-19
Gm20342	0.308374	9.22557	303.966	2.24195e-20	4.08128e-19
Mrpl20	0.321368	9.63943	85.7836	2.29483e-20	4.17483e-19
Ccl12	-0.243801	9.19645	715.908	2.30569e-20	4.19186e-19
Tnrc6a	0.346531	9.39593	103.442	2.37174e-20	4.30914e-19
Macrod1	0.353524	9.29379	144.339	2.50027e-20	4.53972e-19
Fh1	0.380447	9.34321	112.292	2.56464e-20	4.65358e-19
Aco1	0.313416	9.42726	88.7518	2.59445e-20	4.70463e-19
Apoa1bp	0.368268	9.36417	105.81	2.66669e-20	4.83249e-19
Fis1	0.312815	9.74423	85.478	2.67587e-20	4.84599e-19
Pop5	0.334106	9.4696	85.4353	2.73393e-20	4.94793e-19
Tbx2	0.397341	9.27506	156.134	2.81391e-20	5.0894e-19
Dst	0.370491	9.37432	99.8802	2.96162e-20	5.3531e-19
Zfp36	-0.473192	9.43247	85.1748	3.11636e-20	5.62915e-19
Esd	0.313955	9.88345	85.1667	3.12913e-20	5.64858e-19
Pdzd2	0.277907	9.26318	187.838	3.17765e-20	5.73246e-19
Sema4g	0.317691	9.22841	281.347	3.23027e-20	5.82363e-19
Guf1	0.335032	9.22978	274.768	3.36654e-20	6.06541e-19
Tmem261	0.362112	9.32135	125.062	3.84305e-20	6.91947e-19
Armc1	0.346632	9.3406	118.535	4.00349e-20	7.20371e-19
Abhd18	0.356907	9.24951	208.925	4.02461e-20	7.23707e-19
Tfap2b	0.341881	9.27252	156.359	4.13652e-20	7.43352e-19
C2cd2l	0.339659	9.25827	189.171	4.57255e-20	8.21183e-19
Abcc2	0.268802	9.454	85.061	4.58415e-20	8.22737e-19
Preb	0.354398	9.33164	122.233	4.77206e-20	8.55914e-19
Dgat2	0.290028	9.37545	109.353	4.78732e-20	8.581e-19
Depdc7	0.357235	9.22438	274.258	5.1391e-20	9.20566e-19
Mrps15	0.372097	9.33564	117.419	5.20374e-20	9.31253e-19
Pgls	0.31245	9.51034	84.1544	5.20541e-20	9.31253e-19
Mkks	0.3338	9.3986	94.497	5.50491e-20	9.84205e-19
Acaa1a	0.324807	9.45722	84.0258	5.55285e-20	9.92143e-19
Tex261	0.371033	9.33191	123.1	5.6139e-20	1.00241e-18
Imp3	0.37643	9.30855	136.293	5.79191e-20	1.03354e-18
Crym	0.341936	9.2494	196.729	5.81416e-20	1.03685e-18
F13b	0.365486	9.31722	116.036	5.97201e-20	1.06432e-18
Clmn	0.357761	9.34889	110.739	6.17281e-20	1.0994e-18
Mecr	0.395468	9.24253	209.122	6.64563e-20	1.18286e-18
Ogfod2	0.378087	9.26819	167.896	6.76372e-20	1.20312e-18
Akap9	0.355759	9.34818	114.041	7.24899e-20	1.28862e-18
Mrpl38	0.377637	9.32787	118.964	7.42622e-20	1.31928e-18
Tcaim	0.332011	9.23625	234.203	7.43502e-20	1.32001e-18
Mrpl18	0.307248	9.5158	83.3961	7.62146e-20	1.35225e-18
Npas2	0.277073	9.19564	722.531	7.84188e-20	1.39048e-18
Add3	0.347192	9.29106	147.79	8.4358e-20	1.49485e-18
Rdh14	0.381708	9.29308	140.557	8.63136e-20	1.52853e-18
Hlf	0.20432	9.33713	125.216	9.32087e-20	1.64959e-18
Fuz	0.299442	9.21559	350.551	9.99106e-20	1.76709e-18
Gphn	0.339429	9.247	206.782	1.1015e-19	1.94696e-18
Phyhipl	0.333344	9.26277	175.591	1.12996e-19	1.99601e-18
Gm2663	0.112257	9.18354	1568.64	1.13069e-19	1.99604e-18
Trap1	0.356354	9.34873	108.899	1.13208e-19	1.99723e-18
Sfxn5	0.339901	9.24304	211.239	1.17842e-19	2.07767e-18
Slc46a3	0.324455	9.20715	417.812	1.18629e-19	2.09022e-18
Nudcd3	0.374606	9.28845	146.839	1.2018e-19	2.11622e-18
Ubxn1	0.326312	9.48972	82.4703	1.21406e-19	2.13648e-18
Top3b	0.342038	9.2573	185.049	1.25591e-19	2.20874e-18
Serping1	-0.5094	9.22422	337.124	1.31924e-19	2.31864e-18
Slc39a5	0.245452	9.22135	329.573	1.33643e-19	2.34688e-18
Ccdc28b	0.330112	9.23119	254.108	1.33698e-19	2.34688e-18
Smim12	0.370539	9.31271	123.727	1.33947e-19	2.34978e-18
Tstd2	0.366656	9.22129	285.734	1.3472e-19	2.36185e-18
Rnd1	-0.678982	9.25804	232.521	1.36396e-19	2.38975e-18
H2afv	0.33586	9.53974	82.2239	1.37425e-19	2.40627e-18
Klc4	0.339586	9.27605	159.058	1.41411e-19	2.47451e-18
Ppib	0.334339	9.59472	82.1573	1.42108e-19	2.48517e-18
Ndufb6	0.289996	10.0059	82.1429	1.43143e-19	2.50169e-18
Sephs2	0.314561	9.87103	82.1316	1.4396e-19	2.5144e-18
Rbbp9	0.369274	9.25216	193.719	1.50962e-19	2.63505e-18
Strbp	0.348475	9.32559	123.672	1.51798e-19	2.64801e-18
Amdhd2	0.35619	9.30715	133.569	1.58791e-19	2.76826e-18
Fnta	0.383361	9.26538	169.877	1.59487e-19	2.77867e-18
Cd36	-0.52299	9.626	81.8721	1.64025e-19	2.85596e-18
4930402H24Rik	0.340148	9.35659	108.645	1.6421e-19	2.85739e-18
Gsta3	0.342159	9.33586	110.078	1.65721e-19	2.8819e-18
Sall3	0.274816	9.20596	470.64	1.67298e-19	2.90751e-18
Ring1	0.367012	9.24582	204.613	1.71026e-19	2.97046e-18
Clybl	0.375614	9.32553	112.902	1.89082e-19	3.28204e-18
Grsf1	0.345707	9.33788	112.57	1.96093e-19	3.40162e-18
Stc1	-0.368552	9.21069	395.208	1.98266e-19	3.43718e-18
Ccs	0.32613	9.48093	81.4611	2.01705e-19	3.49463e-18
Pvrl3	0.325657	9.37869	96.8987	2.04014e-19	3.53247e-18
R3hdm4	0.36135	9.32126	123.917	2.0764e-19	3.59302e-18
Rita1	0.28398	9.20888	415.393	2.17987e-19	3.76973e-18
Ctdspl	0.323249	9.23965	223.237	2.21302e-19	3.82469e-18
Smap1	0.339336	9.37679	98.5508	2.25494e-19	3.89474e-18
Slc12a1	0.502709	9.90566	81.1824	2.32062e-19	4.00572e-18
Kif21a	0.359961	9.29646	135.311	2.34119e-19	4.03873e-18
Llgl2	0.366859	9.28729	144.047	2.47297e-19	4.26343e-18
Fam134a	0.363277	9.29609	138.626	2.57326e-19	4.4336e-18
B3galnt1	0.331914	9.2109	373.755	2.69577e-19	4.64184e-18
Eva1a	0.35517	9.36063	102.042	2.70805e-19	4.66012e-18
Rab5c	0.309161	9.60532	80.8327	2.76705e-19	4.75872e-18
Sgms2	0.375337	9.43859	80.8109	2.79756e-19	4.80824e-18
Fam213a	0.312676	9.43149	81.9304	2.8759e-19	4.93984e-18
Ncoa1	0.346547	9.24146	215.851	2.9698e-19	5.098e-18
Yipf3	0.380779	9.28519	147.319	3.08805e-19	5.29774e-18
Gsto1	0.377373	9.30821	110.535	3.14175e-19	5.38658e-18
Fdx1l	0.356182	9.32531	119.671	3.3775e-19	5.78722e-18
Psph	0.349334	9.24128	210.611	3.39273e-19	5.80976e-18
Proc	0.336642	9.32481	112.386	3.61042e-19	6.17876e-18
Pmm1	0.351096	9.24002	216.292	3.84768e-19	6.58078e-18
Nme1	0.300278	9.91508	80.158	3.88551e-19	6.64143e-18
Gin1	0.355494	9.23574	229.215	3.94789e-19	6.74393e-18
Abcd4	0.315582	9.24395	210.837	3.96924e-19	6.77627e-18
Zfp768	0.328392	9.24217	214.509	3.99381e-19	6.81406e-18
Mllt10	0.366678	9.29184	143.359	4.02927e-19	6.87037e-18
Pim3	0.327186	9.56364	79.9804	4.24879e-19	7.24027e-18
Slc25a36	0.344228	9.37435	96.7017	4.40912e-19	7.50892e-18
Copz2	0.398562	9.25105	184.126	4.42114e-19	7.52481e-18
Clcnkb	0.355302	9.39089	79.8581	4.51843e-19	7.68573e-18
Ccnl2	0.330212	9.43208	87.2461	4.53887e-19	7.71581e-18
Rnf6	0.343831	9.33885	110.308	4.61029e-19	7.83245e-18
Fxyd4	0.445916	9.44648	79.8077	4.63457e-19	7.86893e-18
Deptor	0.35925	9.31852	117.138	4.98609e-19	8.46064e-18
Pantr1	0.373348	9.26365	159.803	5.37262e-19	9.111e-18
Rabl6	0.341962	9.26968	162.148	5.57994e-19	9.45686e-18
Zkscan1	0.327367	9.28814	139.103	5.83126e-19	9.8768e-18
Ahcy	0.347778	9.25968	164.761	5.83835e-19	9.88284e-18
Acy1	0.260828	9.26715	171.92	6.08687e-19	1.02973e-17
RP24-362L9.2	0.234454	9.24921	201.028	6.37327e-19	1.07753e-17
Dhx32	0.349314	9.21617	306.758	6.53001e-19	1.10336e-17
5031425E22Rik	0.366015	9.30395	127.445	6.57351e-19	1.11004e-17
Dapk1	0.377789	9.2512	182.84	6.98689e-19	1.17914e-17
Svip	0.337144	9.3243	116.109	7.20999e-19	1.21606e-17
Samm50	0.323317	9.39409	94.7095	7.54238e-19	1.27135e-17
Slc36a1	0.285908	9.29051	144.248	7.57847e-19	1.27667e-17
Fermt1	0.327328	9.26049	181.578	7.83862e-19	1.3197e-17
Pyroxd2	0.346262	9.28188	140.679	7.85892e-19	1.32232e-17
Gmpr	0.352378	9.35318	96.7045	7.95786e-19	1.33816e-17
Bmp7	0.304167	9.24726	209.035	8.09796e-19	1.3609e-17
Prnp	0.32826	9.36168	100.892	8.73834e-19	1.46764e-17
Cmc2	0.345708	9.3215	116.938	9.09318e-19	1.52632e-17
RP23-306P12.3	0.0525453	9.47522	78.4599	9.13355e-19	1.53218e-17
Smco4	0.367201	9.32071	109.741	9.31419e-19	1.56155e-17
Hpd	0.254568	9.23864	213.973	9.44924e-19	1.58324e-17
Lppos	0.313004	9.26441	169.839	9.48428e-19	1.58816e-17
Aspscr1	0.339863	9.31484	126.483	9.70622e-19	1.62436e-17
C4b	-0.384805	9.21164	409.339	1.00326e-18	1.67798e-17
Tnfsf8	0.16322	9.18564	2661.29	1.00387e-18	1.67799e-17
Kdf1	0.345025	9.22815	239.857	1.02157e-18	1.70656e-17
Nudt2	0.366053	9.23639	215.568	1.10788e-18	1.84964e-17
Gadd45gip1	0.326489	9.45451	78.406	1.14544e-18	1.9112e-17
Limch1	0.348348	9.23384	225.263	1.14957e-18	1.91696e-17
Tmem55b	0.38857	9.2639	164.097	1.15877e-18	1.93115e-17
Raly	0.340303	9.41304	82.6336	1.16313e-18	1.93726e-17
Prosc	0.3511	9.36414	94.8883	1.22289e-18	2.03559e-17
Cct2	0.349702	9.33835	106.002	1.22554e-18	2.03878e-17
Ubn2	0.357012	9.33562	109.769	1.31532e-18	2.18684e-17
Plekhg5	0.290258	9.21446	342.827	1.3213e-18	2.19547e-17
Cd47	-0.409308	9.53469	77.7244	1.3226e-18	2.19634e-17
BC003965	0.36694	9.30476	125.237	1.37355e-18	2.27958e-17
Gna11	0.337619	9.27474	156.88	1.42649e-18	2.36605e-17
Rcbtb2	0.375534	9.24123	196.353	1.4405e-18	2.38788e-17
Psmb7	0.317242	9.44546	78.1947	1.55354e-18	2.57373e-17
Lap3	0.334453	9.5111	77.3928	1.56298e-18	2.58784e-17
Stxbp4	0.267772	9.20884	409.072	1.58187e-18	2.61756e-17
Ifi35	-0.53096	9.30433	136.729	1.5963e-18	2.63988e-17
Trmt1	0.335085	9.24741	197.647	1.6137e-18	2.66708e-17
B230354K17Rik	0.306959	9.20803	396.925	1.66443e-18	2.74931e-17
Trps1	0.25346	9.41392	83.0732	1.74633e-18	2.88289e-17
Atp5sl	0.337644	9.29108	138.557	1.76744e-18	2.91601e-17
Tsn	0.358084	9.34665	104.68	1.78438e-18	2.94222e-17
Cyp26b1	0.200722	9.19022	1323.33	1.81765e-18	2.99533e-17
Rnaseh2c	0.355554	9.32142	115.933	1.94906e-18	3.20998e-17
Cyp4a31	-0.457647	9.69419	76.8748	2.02875e-18	3.33921e-17
2020-03-06	0.321172	9.397	85.0206	2.02991e-18	3.33921e-17
Mrpl30	0.301596	9.67022	76.8652	2.03864e-18	3.3516e-17
Ly6e	-0.452513	10.0438	76.8538	2.05035e-18	3.36887e-17
Elof1	0.322742	9.43147	78.814	2.09982e-18	3.44815e-17
Nudt5	0.362736	9.27833	138.926	2.19615e-18	3.60421e-17
Bcl7a	0.332064	9.34163	106.397	2.25297e-18	3.69529e-17
Glb1	0.362507	9.28393	138.477	2.3809e-18	3.90283e-17
Ccl7	-0.342462	9.20522	399.969	2.43212e-18	3.98447e-17
Hnrnpr	0.355474	9.33245	109.65	2.49128e-18	4.07899e-17
Dhrs11	0.323385	9.23254	228.772	2.50456e-18	4.09834e-17
Tpp1	0.328287	9.46304	76.3707	2.61513e-18	4.27678e-17
Osbpl2	0.336488	9.22631	251.706	2.73479e-18	4.46986e-17
Fech	0.343326	9.33827	102.692	2.74756e-18	4.48811e-17
Tmem160	0.320364	9.44697	76.8222	2.75322e-18	4.49474e-17
Alad	0.329627	9.35021	99.385	2.79717e-18	4.56382e-17
Igf1r	0.322467	9.48072	76.1637	2.90242e-18	4.73279e-17
Ifi204	-0.478837	9.23074	280.772	3.00816e-18	4.90236e-17
Uck1	0.329214	9.28089	144.487	3.06812e-18	4.99717e-17
Ltb	0.386022	9.23734	174.812	3.2519e-18	5.29341e-17
Usp3	0.357137	9.26376	158.138	3.39645e-18	5.5255e-17
Selo	0.367147	9.24925	180.132	3.46573e-18	5.63493e-17
Gm17750	0.356624	9.29503	118.337	3.51868e-18	5.7177e-17
Paqr9	0.297208	9.35032	98.4132	3.798e-18	6.16801e-17
Hdlbp	0.321083	9.39073	85.8027	4.08472e-18	6.62979e-17
Gm26909	0.270209	9.20785	393.11	4.14432e-18	6.72264e-17
Rbm4b	0.351172	9.33557	108.209	4.16385e-18	6.75041e-17
H2-DMb1	-0.527459	9.31215	121.763	4.24456e-18	6.87726e-17
Serpina1a	-0.428036	9.21646	303.513	4.36029e-18	7.0607e-17
Zfp618	0.329032	9.23134	233.676	4.40562e-18	7.12997e-17
Nsdhl	0.350721	9.23781	207.233	4.40984e-18	7.13267e-17
Maz	0.350959	9.26017	166.057	4.7385e-18	7.65984e-17
Uba52	-0.258824	10.5057	75.184	4.75438e-18	7.68109e-17
Rab11fip2	0.31799	9.25483	179.355	4.76457e-18	7.6931e-17
Agfg2	0.338523	9.25227	177.903	4.80047e-18	7.7466e-17
Egln2	0.351351	9.31268	114.019	4.82083e-18	7.77498e-17
Tsc2	0.340951	9.23159	228.644	4.82545e-18	7.77794e-17
Ubxn6	0.343629	9.32616	109.097	4.87616e-18	7.85517e-17
Hmcn2	0.237583	9.19925	572.462	5.06493e-18	8.15456e-17
Mrpl13	0.356581	9.33308	103.378	5.21394e-18	8.38966e-17
D430042O09Rik	0.304507	9.21791	296.8	5.22692e-18	8.4057e-17
Hadhb	0.319341	9.48007	74.9443	5.36454e-18	8.62207e-17
Trem3	-0.335687	9.20522	439.992	5.4457e-18	8.74748e-17
Igsf11	0.346986	9.35299	89.3636	5.52924e-18	8.87659e-17
Pde4c	0.285166	9.25801	174.898	5.70053e-18	9.14632e-17
Serpina1d	-0.431853	9.2236	229.771	5.70683e-18	9.1512e-17
Gys2	0.224787	9.19319	712.776	5.83619e-18	9.35328e-17
Nipbl	0.350738	9.26849	154.035	5.84908e-18	9.36857e-17
Fam213b	0.331875	9.24609	181.109	6.62622e-18	1.06073e-16
Acad12	0.314304	9.22512	254.242	6.7348e-18	1.07749e-16
Psma4	0.314368	9.58538	74.4628	6.83736e-18	1.09327e-16
Rilp	0.283781	9.232	237.553	6.96386e-18	1.11287e-16
Dym	0.324713	9.21862	279.113	7.17692e-18	1.14626e-16
Abca3	0.307892	9.49103	74.3519	7.23042e-18	1.15415e-16
Bckdk	0.333235	9.31006	119.122	7.39628e-18	1.17995e-16
Itm2b	0.257068	10.9263	74.2559	7.58887e-18	1.20998e-16
Gm10138	0.249538	9.27019	153.074	7.7813e-18	1.23996e-16
Nap1l1	0.304339	9.44362	74.1323	8.07625e-18	1.28623e-16
Psmd11	0.328111	9.39501	78.8601	8.12041e-18	1.29253e-16
Ttc14	0.313932	9.36292	99.823	8.27692e-18	1.31669e-16
Cetn2	0.349951	9.34476	98.929	8.60599e-18	1.36826e-16
Ptdss2	0.331786	9.27522	148.81	8.94951e-18	1.42207e-16
Pirb	-0.457855	9.22085	300.583	9.02302e-18	1.43266e-16
Gmfg	-0.465482	9.29803	103.618	9.0264e-18	1.43266e-16
Golga4	0.321721	9.38688	89.2449	9.43719e-18	1.49701e-16
Mgrn1	0.313319	9.31388	118.765	9.48808e-18	1.50423e-16
BC034090	0.303486	9.28161	146.035	9.688e-18	1.53506e-16
Ap1b1	0.339831	9.28088	138.047	9.88945e-18	1.56609e-16
Zfp524	0.321093	9.22791	234.723	1.05322e-17	1.66693e-16
Nlrp6	0.222358	9.29572	133.963	1.05396e-17	1.66715e-16
Cdk5rap1	0.241208	9.20062	538.116	1.05643e-17	1.67013e-16
Tmed6	0.355664	9.22331	239.784	1.07493e-17	1.69842e-16
Ptpn18	0.321235	9.29685	120.898	1.07621e-17	1.69948e-16
Fcgr4	-0.412994	9.21682	330.945	1.08526e-17	1.7128e-16
Tsc22d4	0.343023	9.30778	120.262	1.12667e-17	1.77715e-16
Tmem175	0.298804	9.21758	297.743	1.15001e-17	1.81295e-16
Gda	-0.437092	9.22887	232.249	1.17878e-17	1.85727e-16
Gfm1	0.35599	9.25112	169.57	1.19477e-17	1.8814e-16
Coq5	0.331537	9.24473	188.136	1.20923e-17	1.9031e-16
Edf1	0.258901	10.0166	73.1748	1.3085e-17	2.05816e-16
Chtf8	0.348893	9.26596	148.753	1.31969e-17	2.0746e-16
Itfg1	0.337239	9.35339	96.1381	1.32906e-17	2.08817e-16
Map3k1	-0.427071	9.34592	98.932	1.37483e-17	2.15886e-16
Egfl7	0.298847	9.25765	136.99	1.43622e-17	2.25399e-16
Gm12962	0.320953	9.20766	362.279	1.448e-17	2.2712e-16
BC025446	0.311467	9.2816	135.328	1.52049e-17	2.38358e-16
Tap2	-0.475271	9.25428	179.848	1.52864e-17	2.39501e-16
Bicd1	0.353551	9.23532	205.55	1.63898e-17	2.56646e-16
Gm561	0.323731	9.38851	86.8203	1.721e-17	2.69338e-16
Gsdmc2	0.127861	9.1846	2850.88	1.74083e-17	2.7229e-16
Relb	-0.350879	9.21471	324.646	1.75618e-17	2.74536e-16
Klhl3	0.248672	9.20034	525.748	1.77494e-17	2.77315e-16
Pm20d1	0.247989	9.22109	277.789	1.86693e-17	2.91525e-16
Glis2	0.288551	9.28114	139.927	1.94687e-17	3.03838e-16
Taok2	0.319214	9.23357	217.38	2.01277e-17	3.13946e-16
Pkp4	0.306953	9.4345	74.0038	2.01857e-17	3.14676e-16
Cdpf1	0.353263	9.27074	143.717	2.09612e-17	3.26583e-16
Nme4	0.31479	9.2109	331.714	2.14865e-17	3.34583e-16
Ppfibp2	0.289375	9.20939	356.264	2.15904e-17	3.36013e-16
Prpsap1	0.346003	9.26382	154.035	2.17751e-17	3.387e-16
Anxa1	-0.431179	9.23461	186.939	2.27633e-17	3.53873e-16
Mapk15	0.264723	9.21858	291.611	2.29824e-17	3.57081e-16
1810034E14Rik	0.260998	9.20867	369.973	2.43914e-17	3.78763e-16
Msh3	0.291061	9.22311	263.45	2.4555e-17	3.81093e-16
Mtch1	0.304728	9.3854	87.5356	2.45784e-17	3.81245e-16
Pcbp4	0.331782	9.24718	181.478	2.50557e-17	3.88433e-16
Tnrc6c	0.322491	9.27953	140.68	2.53499e-17	3.92777e-16
Snrpe	0.312747	9.51927	71.7945	2.62406e-17	4.06352e-16
1700028J19Rik	0.262571	9.21165	344.243	2.6281e-17	4.06753e-16
Tecpr1	0.317704	9.22976	226.695	2.63491e-17	4.07581e-16
Rab4a	0.348418	9.25365	162.186	2.6394e-17	4.08051e-16
Arntl	0.314566	9.21004	338.445	2.69475e-17	4.16378e-16
Lonp1	0.341679	9.28832	124.156	2.71265e-17	4.18913e-16
Arhgap5	0.331709	9.34351	98.829	2.81312e-17	4.34189e-16
Ccdc6	0.295068	9.34391	96.9677	2.88308e-17	4.44742e-16
Ubxn2a	0.323836	9.30178	118.09	2.91091e-17	4.48787e-16
Mtg2	0.341335	9.23429	206.755	3.00604e-17	4.63198e-16
Aldh3a2	0.33822	9.28192	124.861	3.0617e-17	4.71515e-16
Rab34	0.323154	9.32243	106.833	3.06354e-17	4.7154e-16
Hmox2	0.35336	9.30387	116.042	3.20802e-17	4.93506e-16
Atp6v1g3	0.458549	9.4736	71.3821	3.23057e-17	4.96703e-16
Deaf1	0.309372	9.22545	243.199	3.2428e-17	4.98045e-16
Dnajc15	0.309833	9.48137	71.3746	3.24286e-17	4.98045e-16
Slc48a1	0.312132	9.38966	86.1297	3.2847e-17	5.04194e-16
Zfp637	0.341209	9.25492	156.405	3.33458e-17	5.1157e-16
Ermp1	0.370137	9.26228	139.454	3.41685e-17	5.23904e-16
Slc25a42	0.267984	9.30841	122.688	3.44816e-17	5.28416e-16
Fitm1	0.1824	9.47231	71.2277	3.49221e-17	5.34874e-16
Gigyf2	0.331231	9.29161	125.795	3.60803e-17	5.52311e-16
Spsb2	0.363569	9.27693	125.827	3.94087e-17	6.02931e-16
Fbxo7	0.316432	9.30157	115.167	4.05844e-17	6.20581e-16
1700113A16Rik	0.284694	9.21235	316.247	4.07861e-17	6.23323e-16
Letmd1	0.333841	9.23064	217.925	4.10801e-17	6.27474e-16
Lactb	0.359418	9.26555	143.942	4.11134e-17	6.2764e-16
Oat	0.341865	9.53634	70.8007	4.33138e-17	6.60871e-16
Fads6	0.269325	9.21701	291.655	4.44463e-17	6.77782e-16
Gaa	0.356373	9.25942	153.851	4.57806e-17	6.97749e-16
Actr1b	0.339974	9.29531	121.971	4.7075e-17	7.17086e-16
Anapc16	0.339518	9.34549	94.5829	5.30483e-17	8.07638e-16
Ppp2r4	0.307034	9.31788	113.254	5.31499e-17	8.08745e-16
Rnaset2a	0.346021	9.34607	92.0645	5.39891e-17	8.21069e-16
Arsg	0.299483	9.21849	268.208	5.41731e-17	8.2342e-16
Syt17	0.254427	9.20771	382.279	5.49365e-17	8.34569e-16
Dguok	0.351149	9.25574	158.433	5.57816e-17	8.46948e-16
Halr1	0.224986	9.20448	423.92	5.81866e-17	8.82986e-16
Palld	0.263471	9.20973	358.586	5.96462e-17	9.04644e-16
Osgin1	0.314597	9.31582	94.32	6.03534e-17	9.14876e-16
Unkl	0.326691	9.23458	200.165	6.24065e-17	9.45485e-16
Rad23a	0.311571	9.32994	102.985	6.26429e-17	9.48554e-16
Tpm4	-0.384913	9.33918	83.1271	6.37256e-17	9.64427e-16
Fhod3	0.338737	9.23432	199.154	6.45632e-17	9.76575e-16
Pafah2	0.305758	9.28504	126.836	6.4767e-17	9.79128e-16
Zfp706	0.272392	10.002	69.9694	6.58726e-17	9.95305e-16
Spag7	0.345154	9.34251	93.61	6.67828e-17	1.00851e-15
Ninl	0.268167	9.22466	244.592	6.73967e-17	1.01724e-15
Tgtp1	-0.598224	9.23952	290.579	6.9411e-17	1.04707e-15
Ms4a1	0.203725	9.18975	1141.28	7.0967e-17	1.06997e-15
Tm7sf3	0.323303	9.3124	107.35	7.23624e-17	1.09042e-15
Cwc15	0.315864	9.42358	74.7616	7.36076e-17	1.10859e-15
Lztfl1	0.357009	9.27839	129.331	7.43447e-17	1.11909e-15
Nxt2	0.307171	9.31628	102.871	7.47211e-17	1.12415e-15
Rorc	0.268537	9.27798	138.55	7.59884e-17	1.1426e-15
Ildr2	0.296785	9.26623	146.917	7.83443e-17	1.17739e-15
Ccr2	0.231731	9.20418	426.711	7.95245e-17	1.19449e-15
Zfp91	0.325923	9.3321	98.8625	7.98053e-17	1.19806e-15
Hexb	0.351946	9.30272	100.674	8.17121e-17	1.22603e-15
Stx4a	0.323676	9.29071	124.82	8.4074e-17	1.26079e-15
Tap1	-0.557471	9.2603	186.734	8.79033e-17	1.31751e-15
Srd5a1	0.294089	9.20986	320.892	8.92335e-17	1.33674e-15
Pex7	0.337438	9.32075	98.9738	9.04577e-17	1.35435e-15
Atp6v0d1	0.320753	9.36799	83.5885	9.28144e-17	1.38889e-15
Csnk2a1	0.328453	9.34761	96.5962	9.50757e-17	1.42197e-15
Pja1	0.347735	9.24386	172.803	9.56828e-17	1.43029e-15
Ptprd	0.269267	9.37342	89.3258	9.58845e-17	1.43254e-15
Ccdc91	0.324596	9.23305	196.1	9.61484e-17	1.43571e-15
Dtx3l	-0.531874	9.27922	166.504	9.67721e-17	1.44426e-15
Chmp3	0.323045	9.37225	82.6449	9.75842e-17	1.4556e-15
Cdk12	0.336044	9.26492	148.223	1.02891e-16	1.53394e-15
Ptpru	0.192028	9.19015	1002.52	1.06003e-16	1.57949e-15
Usp18	-0.607813	9.267	247.384	1.082e-16	1.61137e-15
Tnfaip3	-0.433714	9.22543	262.928	1.15181e-16	1.71443e-15
Dpys	0.281631	9.20456	386.343	1.18313e-16	1.76011e-15
Psmb9	-0.505154	9.27972	130.025	1.19165e-16	1.77185e-15
Polr2j	0.303897	9.46277	68.6502	1.28163e-16	1.90462e-15
Plekha7	0.303813	9.25748	161.523	1.31627e-16	1.95506e-15
9330151L19Rik	0.25351	9.20352	432.516	1.32935e-16	1.97345e-15
Thoc7	0.298516	9.52771	68.5068	1.37785e-16	2.04435e-15
Hs6st1	0.317745	9.28642	126.285	1.38702e-16	2.05687e-15
Perp	0.343107	9.27911	123.653	1.39553e-16	2.0684e-15
Osgepl1	0.341872	9.22937	208.707	1.46972e-16	2.17721e-15
Slc7a11	-0.205727	9.19443	651.676	1.47183e-16	2.17917e-15
Ptprcap	0.320188	9.23222	178.676	1.49832e-16	2.21723e-15
Afm	0.29677	9.22022	265.081	1.51134e-16	2.23532e-15
Pla2g5	0.246663	9.19572	630.862	1.56027e-16	2.30646e-15
Zdhhc6	0.323964	9.28163	126.219	1.58046e-16	2.33507e-15
Aurkaip1	0.300759	9.53625	68.2084	1.60176e-16	2.36531e-15
Fcer2a	0.10779	9.18379	2762.98	1.64378e-16	2.42607e-15
Hacd2	0.353391	9.32145	95.7012	1.6697e-16	2.46303e-15
Pgp	0.336056	9.30545	104.632	1.7378e-16	2.56213e-15
Iqsec1	0.325144	9.26295	145.447	1.7425e-16	2.56771e-15
Zfp157	0.313041	9.23301	205.969	1.7531e-16	2.58198e-15
Cyb5rl	0.28111	9.23115	205.136	1.76036e-16	2.59131e-15
Apool	0.357518	9.27962	119.294	1.76203e-16	2.59239e-15
Scand1	0.284878	9.76142	67.9354	1.83836e-16	2.70328e-15
Shmt1	0.314018	9.27117	136.957	1.87669e-16	2.75819e-15
Rfc2	0.326453	9.27347	132.841	1.95867e-16	2.87717e-15
Bpgm	0.345776	9.27254	133.891	1.98663e-16	2.91671e-15
Echdc1	0.344854	9.25339	147.289	2.0343e-16	2.98513e-15
Pigq	0.313491	9.31302	103.438	2.09333e-16	3.07015e-15
Pbx1	0.33761	9.36737	81.562	2.12599e-16	3.11641e-15
Dohh	0.329252	9.29576	111.859	2.17236e-16	3.18272e-15
Atad3a	0.289186	9.27425	139.863	2.23473e-16	3.27239e-15
Srrm2	0.305515	9.59854	67.4794	2.31413e-16	3.38688e-15
Podn	0.202649	9.19313	772.44	2.35273e-16	3.44157e-15
Gsdmc3	0.0936355	9.18341	2562.38	2.37452e-16	3.47163e-15
Eefsec	0.316496	9.24868	165.926	2.55037e-16	3.72678e-15
Irak1bp1	0.320549	9.23455	192.146	2.59717e-16	3.7932e-15
Vps26a	0.34872	9.27144	131.066	2.69387e-16	3.93238e-15
Cd300lg	0.218201	9.19934	440.185	2.72107e-16	3.97002e-15
Dram2	0.300542	9.43444	69.7112	2.86536e-16	4.17835e-15
Iqcg	0.268617	9.24656	168.086	3.04827e-16	4.44276e-15
Timm17b	0.343521	9.30447	106.646	3.05372e-16	4.44839e-15
Mrpl2	0.318368	9.37816	80.1835	3.06557e-16	4.46333e-15
Osbp2	0.276061	9.20676	352.625	3.07331e-16	4.47228e-15
Lims2	0.342785	9.26264	139.415	3.17796e-16	4.62216e-15
Cybb	-0.499652	9.24016	173.778	3.23002e-16	4.69544e-15
Serpine1	-0.491795	9.22411	293.912	3.23319e-16	4.69761e-15
Snx24	0.294995	9.21169	298.746	3.3497e-16	4.86436e-15
Mettl9	0.329252	9.37233	80.8551	3.35457e-16	4.86891e-15
Fam114a2	0.320304	9.25235	158.576	3.3746e-16	4.89545e-15
Pdia3	0.30855	9.62547	66.6895	3.44794e-16	4.99925e-15
Immp1l	0.320372	9.39451	74.9479	3.57096e-16	5.17493e-15
H2-T22	-0.376937	9.3948	74.4011	3.63883e-16	5.27056e-15
Cops7a	0.326957	9.30377	112.201	3.71313e-16	5.37541e-15
Cct8	0.334914	9.34964	87.3002	3.77915e-16	5.46815e-15
Palm	0.24699	9.28959	123.981	3.80354e-16	5.50059e-15
Trmt2b	0.295554	9.23364	194.204	3.85448e-16	5.57139e-15
Cd3e	0.291112	9.20131	421.441	3.92935e-16	5.67668e-15
Tmem80	0.330719	9.29189	117.13	4.07095e-16	5.87821e-15
Aarsd1	0.225161	9.19375	726.876	4.09545e-16	5.91053e-15
Smim22	0.311077	9.46892	66.3454	4.10228e-16	5.91735e-15
Naa10	0.309789	9.27218	133.952	4.12241e-16	5.94331e-15
Mcrs1	0.345138	9.2736	128.43	4.25955e-16	6.13788e-15
Sdf2	0.334847	9.33252	92.8105	4.2895e-16	6.17785e-15
Il1r2	-0.318226	9.20509	398.41	4.48435e-16	6.45516e-15
Prpf8	0.332576	9.27179	133.687	4.56848e-16	6.57288e-15
Suclg2	0.288066	9.77231	66.1226	4.59064e-16	6.60138e-15
Cd81	0.309547	9.81923	66.1212	4.59393e-16	6.60272e-15
Pdcd2	0.336994	9.23348	191.769	4.68711e-16	6.73318e-15
Rragc	0.327382	9.26731	135.67	4.69772e-16	6.74496e-15
Acd	0.341334	9.2401	174.125	4.89661e-16	7.02692e-15
Prrc2a	0.33421	9.28936	116.017	4.92351e-16	7.0619e-15
Ghr	0.285222	9.88942	65.9507	5.00689e-16	7.17782e-15
Fam21	0.342634	9.25599	151.305	5.0159e-16	7.18706e-15
Dnajc19	0.269342	9.88098	65.9142	5.10013e-16	7.30401e-15
Atn1.1	0.317515	9.23657	185.179	5.22257e-16	7.47554e-15
Nr4a1	-0.430024	9.22932	203.744	5.30184e-16	7.58512e-15
Fam181b	0.139997	9.18509	2227.28	5.37146e-16	7.68081e-15
Hscb	0.34178	9.25169	151.586	5.68958e-16	8.13154e-15
Adamtsl2	0.218737	9.19348	758.988	5.71435e-16	8.16277e-15
Smyd4	0.221349	9.20682	370.953	5.86225e-16	8.36804e-15
AI607873	-0.272061	9.20103	506.467	5.86402e-16	8.36804e-15
Sv2a	0.273318	9.21916	253.1	6.10139e-16	8.70233e-15
BC031181	0.286966	9.59867	65.5058	6.26851e-16	8.93614e-15
Dlat	0.311438	9.33927	91.8846	6.30642e-16	8.9856e-15
Arl6ip4	0.333298	9.31215	101.988	6.49803e-16	9.25391e-15
Cebpz	0.331204	9.25225	151.091	6.60703e-16	9.40435e-15
Mrpl37	0.332708	9.29233	110.748	6.65934e-16	9.474e-15
Tet3	0.26439	9.22345	237.338	6.93332e-16	9.85877e-15
Ifi27l2a	-0.495905	9.36898	65.2695	7.06311e-16	1.00382e-14
Mfap3l	0.2724	9.30393	108.075	7.10002e-16	1.00856e-14
Neurl4	0.276814	9.31348	105.533	7.31126e-16	1.03804e-14
Zfp30	0.242577	9.2088	341.9	7.61877e-16	1.08115e-14
Rnf208	0.263548	9.21169	304.008	7.8068e-16	1.10727e-14
Klhdc2	0.324958	9.3215	94.3202	7.86287e-16	1.11466e-14
Apopt1	0.314744	9.32535	98.1551	8.10856e-16	1.1489e-14
Hmgb3	0.341445	9.2742	118.144	8.49367e-16	1.20286e-14
Fam102b	0.281503	9.21841	238.306	9.13106e-16	1.29247e-14
Psmd6	0.343307	9.29931	104.931	9.53196e-16	1.34854e-14
AY036118	0.239982	9.24319	182.269	9.60045e-16	1.35754e-14
Smim8	0.328736	9.33801	87.4651	9.62769e-16	1.36071e-14
Hdhd2	0.323344	9.27508	122.996	9.6884e-16	1.3686e-14
Rbfa	0.326904	9.26754	133.129	1.04917e-15	1.48133e-14
Cspp1	0.306755	9.31334	100.967	1.0578e-15	1.49276e-14
Pfas	0.307434	9.2399	176.481	1.06971e-15	1.5088e-14
Mrpl14	0.286483	9.62808	64.4245	1.08234e-15	1.52586e-14
Flna	-0.440751	9.24458	157.076	1.15008e-15	1.62053e-14
Eif2a	0.337094	9.28351	116.601	1.15833e-15	1.63134e-14
Rps14	0.188687	11.2329	64.2373	1.1897e-15	1.67467e-14
Clcn3	0.283365	9.43638	67.8904	1.19423e-15	1.6802e-14
Rasgrp3	0.195379	9.1904	865.571	1.21031e-15	1.70197e-14
Thoc3	0.323194	9.23093	192.608	1.21573e-15	1.70874e-14
Bdh1	0.30744	9.2521	142.344	1.23305e-15	1.73221e-14
Mef2c	0.268851	9.20689	351.139	1.23595e-15	1.73504e-14
Vwa1	0.254643	9.21439	269.821	1.23631e-15	1.73504e-14
Fam63b	0.315305	9.33818	87.1879	1.24052e-15	1.74009e-14
Tmem216	0.305356	9.22017	239.727	1.25615e-15	1.76112e-14
Aimp1	0.338862	9.28922	111.818	1.28626e-15	1.80243e-14
Dab2	0.300599	9.91727	64.0689	1.29537e-15	1.81361e-14
[truncated: 7,107 more rows]

## Sheet: 1hr_pseudobulk
	logFC	logCPM	F	PValue	FDR
Cxcl1	3.21856	9.65004	8811.22	0	0
Cxcl2	2.1912	9.52354	2557.88	0	0
Rnd1	1.72376	9.25804	4874.03	0	0
Noct	1.67747	9.28079	3329.35	0	0
Slc7a13	1.60197	9.53282	1578.1	0	0
Slco1a1	1.53447	9.38594	1662.64	0	0
mt-Atp8	1.27128	10.4827	2010.11	0	0
Spp1	-2.31249	12.443	1516.17	5.32872025076928e-315	1.86491886976323e-311
Icam1	1.52564	9.3366	2005.86	1.12706675585099e-312	0
Lpl	1.53263	9.85673	1479.5	8.39896e-308	2.35154e-304
Ccl2	1.41413	9.40184	1445	5.16212e-301	1.3139e-297
Cndp2	1.46914	10.0599	1409.19	5.96328e-294	1.39133e-290
Vcam1	1.43546	9.29959	2053.85	4.31546e-290	9.29418e-287
Marcksl1	1.45077	9.38637	1240.4	1.93191e-260	3.86355e-257
Mgst1	-1.80648	9.97757	1238.34	4.99263e-260	9.31891e-257
Fgg	-2.41458	9.87084	1218.97	3.70276e-256	6.47936e-253
B2m	-1.49114	11.0765	1096.43	1.47433e-231	2.42813e-228
Fga	-2.16042	9.73729	1078.89	1.35454e-227	2.10691e-224
Tnfaip8	1.15561	9.637	1070.77	2.2086e-226	3.25455e-223
Plac8	-2.24115	10.0219	971.501	2.85763e-206	4.0004e-203
Plin2	-1.69575	9.63938	944.275	9.89545e-201	1.3193e-197
Dnaja1	1.07481	9.6412	932.388	2.61427e-198	3.32701e-195
Apold1	1.16156	9.2043	6808.22	3.75581e-195	4.57196e-192
Acsm3	1.19838	9.43764	914.306	1.27345e-194	1.48559e-191
8430408G22Rik	1.24553	9.28743	1305.59	2.41169e-187	2.7009e-184
Id3	-1.75551	9.51121	865.53	1.1891e-184	1.28048e-181
Psmb8	-1.66212	9.55333	861.656	7.38716e-184	7.66021e-181
Mt1	-1.96502	11.3603	858.704	2.97173e-183	2.97152e-180
Egr1	1.24517	9.29179	1153.04	5.22069e-180	5.04031e-177
Rbm3	-1.335	9.79505	835.897	1.40801e-178	1.31405e-175
Odc1	1.04314	9.85153	823.827	4.22687e-176	3.81754e-173
Car3	1.15196	9.30144	1046.18	7.45445e-174	6.52218e-171
Irf7	-1.92448	9.55964	911.696	8.14878e-170	6.91362e-167
Cyp4a14	-2.51575	10.0085	792.034	1.45042e-169	1.19438e-166
Keg1	0.931939	10.2076	749.248	9.53685e-161	7.62893e-158
Slc22a28	0.949234	9.50322	722	4.06087e-155	3.15823e-152
Dnajc12	0.954078	9.68498	700.453	1.16866e-150	8.84328e-148
Gatm	1.12586	10.3904	686.423	9.43552e-148	6.95199e-145
Rps20	-0.892554	10.472	682.24	6.95173e-147	4.99063e-144
H2-K1	-1.30215	10.038	662.366	9.24961e-143	6.47426e-140
Cxcl10	0.643705	9.84845	832.436	1.7669e-139	1.20658e-136
Cyp4a10	-1.49328	9.94398	632.228	1.7025e-136	1.13492e-133
Rplp1	-0.725183	10.9551	631.774	2.11648e-136	1.37808e-133
Ucp2	-1.39241	9.52661	602.615	2.51199e-130	1.59843e-127
Eef1a1	-0.671159	11.4273	601.691	3.9151e-130	2.43589e-127
Irgm1	-1.40125	9.67802	601.458	4.37973e-130	2.66573e-127
Hmox1	1.00109	9.4784	579.937	1.35878e-125	8.0943e-123
Mpv17l	0.923875	9.49497	574.743	1.65272e-124	9.64017e-122
Plk3	0.937705	9.26456	1392.33	1.25298e-120	7.15935e-118
Mt2	-1.69799	10.2062	555.09	2.12621e-120	1.19059e-117
Hmgcs2	-1.84416	9.55575	692.607	3.51992e-120	1.93237e-117
Nfkbia	1.01237	9.51145	553.687	4.18015e-120	2.25069e-117
Nme2	0.858347	9.52979	552.907	6.08797e-120	3.21605e-117
Akr1c21	0.84027	10.6889	546.734	1.19329e-118	6.18697e-116
mt-Nd4l	0.760458	10.7859	544.34	3.78365e-118	1.92609e-115
Herpud1	0.875215	9.64457	538.421	6.57209e-117	3.28581e-114
Fut9	0.821712	9.97118	534.244	4.93046e-116	2.42181e-113
Tapbp	-1.18588	9.47115	549.468	2.10961e-114	1.01836e-111
Polr3e	0.863568	9.60798	518.282	1.09599e-112	5.20095e-110
AW112010	-1.52574	9.91234	517.99	1.2623e-112	5.89031e-110
Gm10053	0.817787	9.56856	516.794	2.24888e-112	1.0322e-109
Agps	0.8956	9.36177	614.484	3.77005e-112	1.70248e-109
H2-T23	-1.19641	9.43459	558.682	3.50577e-111	1.55801e-108
mt-Atp6	0.636699	15.333	503.947	1.11913e-109	4.89585e-107
Hspe1	0.673129	10.3659	498.421	1.62111e-108	6.98275e-106
Lgals3bp	-1.33085	9.38872	676.083	6.65677e-107	2.82388e-104
Cyb5a	0.71323	10.8254	486.96	4.15711e-106	1.73718e-103
Lrg1	-1.39502	9.33729	699.341	6.34023e-106	2.6105e-103
Acy3	0.857241	10.2475	485.541	8.26455e-106	3.35349e-103
Serpine1	0.746513	9.22411	1982.66	9.81255e-106	3.92474e-103
Gas2	0.790886	9.55179	480.868	7.94679e-105	3.09708e-102
Pycard	-1.18216	9.35387	555.747	7.96448e-105	3.09708e-102
Mif	-0.769248	10.704	479.378	1.63524e-104	6.27172e-102
Zfos1	-1.10335	9.42846	533.663	3.1949e-104	1.2088e-101
Fth1	-0.588294	14.2075	470.546	1.18155e-102	4.41081e-100
Psme1	-1.09718	9.44016	488.833	3.82768e-102	1.4101e-99
Dynll1	0.803224	9.74688	466.512	8.35306e-102	3.03726e-99
Rps12	-0.847961	10.1711	461.75	8.41128e-101	3.01922e-98
Ctsb	-0.995086	9.78884	455.931	1.41594e-99	5.01815e-97
Gapdh	-0.693608	10.6925	452.48	7.56162e-99	2.64638e-96
H2-D1	-1.08244	10.1729	442.006	1.22298e-96	4.22728e-94
mt-Nd4	0.593112	13.6988	436.286	1.97079e-95	6.72906e-93
Bst2	-1.18303	9.52652	430.268	3.67344e-94	1.23914e-91
Fcer1g	-1.68105	9.61869	425.292	4.12981e-93	1.3765e-90
Ctsl	-0.982478	9.85116	425.216	4.28652e-93	1.41193e-90
Sprr1a	0.798754	9.24526	784.003	6.63608e-93	2.16043e-90
Slc22a30	0.759883	9.7605	419.815	5.93259e-92	1.9092e-89
Inmt	0.785662	9.76729	417.175	2.14372e-91	6.82043e-89
Igfbp5	0.753005	9.34107	518.202	1.08011e-90	3.39786e-88
Tmigd1	0.850733	9.43212	412.922	1.69936e-90	5.28652e-88
Nfkbiz	0.873231	9.276	768.061	2.11685e-90	6.51292e-88
Rps28	-0.59475	10.8493	410.163	6.51028e-90	1.98125e-87
Cdkn1a	0.882384	9.33143	483.445	3.21359e-89	9.67462e-87
Rpl23	-0.56706	10.8965	404.422	1.06693e-88	3.17785e-86
Rps8	-0.577113	10.9083	386.563	6.44412e-85	1.89918e-82
Gm10116	0.693991	10.197	385.527	1.06823e-84	3.11546e-82
Bcl6	0.886858	9.25269	863.983	1.83018e-84	5.28262e-82
Tspo	-0.917935	9.7583	384.097	2.1459e-84	6.13072e-82
Amacr	0.669796	9.4457	390.305	3.49176e-84	9.87497e-82
Uba52	0.541761	10.5057	382.924	3.80432e-84	1.06513e-81
Wfdc17	-2.4601	9.79277	378.334	3.57365e-83	9.90644e-81
Hbegf	0.869996	9.26044	768.923	5.04921e-82	1.38596e-79
Psap	-0.79126	10.3648	370.566	1.58598e-81	4.3111e-79
Plaur	0.830869	9.25362	774.855	7.27161e-80	1.9576e-77
Atp11a	0.80153	9.62167	362.497	8.17604e-80	2.18012e-77
Klf2	-1.15108	9.38469	362.293	9.03174e-80	2.38557e-77
Eef2	-0.662878	10.2755	358.454	5.89941e-79	1.54366e-76
Sat1	-0.694748	10.3451	358.149	6.84724e-79	1.77508e-76
Nuak2	-0.979418	9.44633	362.584	1.91578e-78	4.92092e-76
Rps24	-0.603774	10.6654	353.46	6.78174e-78	1.72614e-75
Lyz2	-1.63673	9.72499	351.748	1.56672e-77	3.95179e-75
Grina	-0.80719	9.8639	350.443	2.9655e-77	7.41321e-75
Txn1	-0.673137	10.4372	349.535	4.62427e-77	1.14576e-74
Igtp	-1.28044	9.42259	584.878	2.19355e-76	5.38728e-74
Sh3bgrl3	-1.1571	9.86028	344.833	4.61517e-76	1.12361e-73
Zbtb20	0.664607	10.1782	343.992	6.96488e-76	1.68106e-73
Ifi27	-0.928058	9.49886	342.539	1.4188e-75	3.39518e-73
Hspa5	0.695685	9.89436	340.652	3.57341e-75	8.47866e-73
Csf1	0.71323	9.21473	1584.72	8.94301e-75	2.10409e-72
Idi1	0.772265	9.27264	654.028	1.52931e-74	3.56813e-72
Hsp90aa1	0.682079	9.68033	337.532	1.64579e-74	3.80817e-72
Gzma	-1.54649	9.45527	337.441	1.7207e-74	3.94888e-72
Etv1	0.80486	9.28294	594.889	5.1701e-74	1.17685e-71
Gm15563	0.497619	9.19114	3432.43	9.59053e-74	2.16545e-71
Umod	-1.3852	10.909	332.324	2.10964e-73	4.72525e-71
Cela1	0.661625	9.81426	332.034	2.43221e-73	5.40452e-71
Rpl18	-0.62579	10.3588	331.11	3.8235e-73	8.42915e-71
Alas1	-0.904493	9.48843	330.359	5.525e-73	1.20851e-70
Coro1a	-1.1232	9.36419	341.744	9.02132e-73	1.95798e-70
mt-Nd1	0.499323	14.4722	327.181	2.62233e-72	5.64768e-70
Psme2	-0.885009	9.50495	321.735	3.78427e-71	8.08795e-69
Wfdc2	-1.07635	9.77116	319.046	1.41487e-70	3.00103e-68
Aspa	0.612112	9.52003	317.518	2.99335e-70	6.30134e-68
Psmb10	-1.02522	9.35092	454.374	1.03943e-69	2.17179e-67
Plk2	0.729895	9.20624	1763.98	4.31343e-69	8.94573e-67
Acot1	-0.977068	9.4101	373.61	6.32255e-68	1.30161e-65
mt-Nd6	0.732077	9.32079	459.304	1.98634e-67	4.05939e-65
Samhd1	-1.0282	9.32694	457.761	2.46078e-67	4.99253e-65
Hsd3b2	0.610544	9.31573	513.428	2.8818e-67	5.80466e-65
Akap12	0.582351	9.23196	986.999	8.9674e-67	1.79335e-64
Lactb2	0.58238	9.64674	300.842	1.07268e-66	2.12999e-64
Rpl13a	-0.519622	11.0491	300.701	1.1493e-66	2.26607e-64
Cd63	-0.564389	10.7512	299.146	2.46698e-66	4.8301e-64
Ifi27l2a	-1.04738	9.36898	298.903	2.78008e-66	5.40533e-64
Hrsp12	0.605199	10.6386	298.617	3.19975e-66	6.17839e-64
Ttc36	0.595077	10.7158	298.084	4.15671e-66	7.9712e-64
Slc22a7	0.662159	9.21157	1305.56	5.03651e-66	9.59267e-64
BC005561	0.66053	9.44616	297.598	5.27802e-66	9.98473e-64
Hsp90b1	0.653123	9.79177	297.11	6.70767e-66	1.26041e-63
Lcn2	-3.10698	10.1357	294.348	2.60546e-65	4.86318e-63
Ubc	-0.644513	10.1874	294.281	2.69181e-65	4.99108e-63
C3	-1.24703	9.36965	401.19	3.03965e-65	5.59895e-63
Selenbp1	-0.763393	9.74961	293.423	4.10493e-65	7.51176e-63
Tyrobp	-1.36492	9.59344	292.875	5.3722e-65	9.76694e-63
Grn	-0.836315	9.44187	297.942	9.75629e-65	1.7623e-62
Calml4	0.62337	9.90489	291.342	1.14117e-64	2.0481e-62
Phlda1	0.771431	9.22231	987.257	1.1692e-64	2.08505e-62
Tnfaip3	0.683876	9.22543	1063.3	1.26953e-64	2.24964e-62
Arhgdib	-1.00339	9.35392	303.94	1.88317e-64	3.31604e-62
Hykk	0.475451	9.58961	289.172	3.31677e-64	5.80393e-62
Lipo1	0.754295	9.2369	789.403	3.35749e-64	5.83869e-62
Ctsz	-0.851023	9.45362	287.872	6.2829e-64	1.08586e-61
Ugt2b38	0.684402	9.84978	286.646	1.14788e-63	1.97167e-61
Hist2h2aa1	0.711363	9.32012	405.64	2.63277e-63	4.49466e-61
Rpl19	-0.498042	10.7283	284.809	2.83246e-63	4.80625e-61
Lgals3	-1.03088	9.5088	284.038	4.13965e-63	6.98205e-61
Pah	0.590765	9.88614	283.672	4.95457e-63	8.30647e-61
Rpl12	-0.717154	9.91139	279.558	3.74851e-62	6.24707e-60
Zfp36	0.683421	9.43247	278.159	7.46287e-62	1.23636e-59
Gm20400	0.614546	9.19917	2148.99	1.26031e-61	2.07565e-59
Ly6a	-0.809661	10.6078	274.822	3.85476e-61	6.31143e-59
Rpl31	-0.516428	10.4759	273.873	6.1486e-61	1.00086e-58
Wdr89	-0.747759	9.55561	272.141	1.44221e-60	2.33405e-58
Lypla1	0.597095	9.58194	269.92	4.30402e-60	6.92551e-58
Ctsd	-0.785614	9.75491	269.409	5.53542e-60	8.85605e-58
Rps10	-0.574965	10.2975	266.656	2.14762e-59	3.41643e-57
Ly6e	-0.90552	10.0438	262.623	1.56582e-58	2.47682e-56
Acadl	-0.745594	9.49419	260.877	5.30899e-58	8.35062e-56
Kdm6b	0.731857	9.29847	405.179	1.16127e-57	1.81639e-55
S100a11	-0.835771	9.9379	258.088	1.46295e-57	2.27553e-55
Rpl8	-0.50647	10.5688	258.044	1.49501e-57	2.31256e-55
Pkm	-0.936557	9.57874	257.978	1.54439e-57	2.37044e-55
Rpl21	-0.489531	10.7161	257.971	1.54936e-57	2.37044e-55
Rpl28	-0.483103	10.6712	257.453	2.00073e-57	3.04438e-55
Cstb	-0.65693	9.926	256.411	3.34299e-57	5.05929e-55
Kng2	-0.975737	9.63895	255.68	4.79398e-57	7.21623e-55
Rplp0	-0.488938	10.9749	255.236	5.96684e-57	8.93367e-55
Ctsc	-0.892181	9.28579	403.593	6.68747e-57	9.95935e-55
Gnb2l1	-0.661752	9.84434	252.49	2.31044e-56	3.42264e-54
Cd93	0.697183	9.21876	888.039	2.87486e-56	4.23633e-54
Rpsa	-0.597619	10.2149	250.552	6.00699e-56	8.80544e-54
Clu	-1.05964	9.8439	249.674	9.26299e-56	1.35076e-53
Acsm2	0.597912	10.8098	249.398	1.06122e-55	1.53948e-53
Arpc1b	-0.926883	9.46817	249.255	1.139e-55	1.64381e-53
Shisa5	-0.802944	9.45327	249.032	1.27118e-55	1.82515e-53
mt-Cytb	0.452459	14.5318	248.494	1.65801e-55	2.36841e-53
mt-Co2	0.465171	13.8332	248.342	1.78688e-55	2.53955e-53
Dusp1	0.725762	9.68086	247.547	2.64511e-55	3.74029e-53
Ccl5	-1.24925	9.85812	247.077	3.33443e-55	4.69133e-53
Eif6	-0.717216	9.51621	246.721	3.97464e-55	5.5641e-53
Spi1	-0.954654	9.28952	394.981	4.35266e-55	6.06297e-53
Mrps6	-0.883264	9.49607	246.083	5.44427e-55	7.54597e-53
Tagln2	-0.757932	9.46285	246.032	5.58541e-55	7.70347e-53
Fau	-0.458423	10.9674	245.004	9.27268e-55	1.27263e-52
Defb29	0.560025	9.70706	244.561	1.15404e-54	1.57614e-52
Atp1a1	-0.667361	10.9162	243.871	1.62154e-54	2.20388e-52
Lgmn	-0.689781	10.0412	243.391	2.05525e-54	2.77986e-52
Atf3	0.545572	9.20846	1412.37	2.22635e-54	2.9968e-52
Lrp2	0.573901	10.3977	241.562	5.0685e-54	6.78985e-52
Gk	0.507962	9.93437	241.034	6.57644e-54	8.76796e-52
Sepw1	-0.77172	9.73801	241.007	6.66598e-54	8.84521e-52
Cd47	-0.77288	9.53469	239.658	1.2975e-53	1.71356e-51
Chil3	-0.966648	9.27599	388.481	3.70002e-53	4.86353e-51
Aspdh	0.550348	9.4125	270.523	3.94991e-53	5.16774e-51
Akr1c14	0.605547	9.23436	664.437	4.40664e-53	5.73847e-51
Msmp	0.313413	9.18709	6355.62	6.13769e-53	7.9557e-51
Rpl11	-0.45172	10.7576	234.655	1.53367e-52	1.97878e-50
Chmp4b	-0.730499	9.51069	233.81	2.32778e-52	2.9896e-50
Trim63	0.561093	9.30702	392.883	2.96443e-52	3.78987e-50
Maff	0.517781	9.2105	1346.2	7.98929e-52	1.01675e-49
Pter	0.48543	9.65656	227.913	4.28688e-51	5.43095e-49
Rpl38	-0.399787	10.9739	227.624	4.94478e-51	6.23621e-49
4430402I18Rik	0.578187	9.31484	357.126	8.79086e-51	1.10371e-48
Ly6c2	-0.865382	9.29154	295.496	1.02814e-50	1.28508e-48
Gpx3	-0.61503	14.4511	224.923	1.8795e-50	2.33877e-48
Tnfaip2	0.683589	9.28181	348.294	4.2197e-50	5.22758e-48
Tob1	0.58242	9.51085	223.237	4.32381e-50	5.33295e-48
Gbp2	-1.49404	9.65895	337.7	9.58754e-50	1.17733e-47
Glud1	-0.671796	9.66467	220.463	1.7039e-49	2.08322e-47
Car4	0.505879	9.45293	223.916	2.72682e-49	3.31937e-47
Rac2	-0.855678	9.34197	228.771	3.41917e-49	4.14415e-47
Pglyrp1	-1.051	9.31455	287.804	3.44232e-49	4.15423e-47
Ctss	-0.848719	9.29045	311.539	3.49422e-49	4.19876e-47
Rps16	-0.443109	10.8345	218.353	4.83901e-49	5.78985e-47
Rps2	-0.449604	10.9639	217.335	8.00282e-49	9.53459e-47
Smarca2	0.539298	9.44178	229.987	8.16451e-49	9.68602e-47
Rpl30	-0.566328	10.0455	217.148	8.78019e-49	1.03725e-46
Ddit4	0.67341	9.25921	419.528	1.43313e-48	1.68592e-46
Ifitm3	-0.983919	10.1497	214.164	3.8429e-48	4.50182e-46
Igfbp1	0.64981	9.22017	767.817	4.00334e-48	4.67023e-46
Cycs	0.413546	10.8874	213.825	4.54336e-48	5.27822e-46
Aldoa	-0.53756	10.2217	213.524	5.27324e-48	6.10083e-46
G6pc	0.624638	9.8711	213.196	6.2026e-48	7.14652e-46
Ndufa4	0.34727	11.4555	213.067	6.61155e-48	7.58648e-46
Far1	0.553021	9.50496	212.7	7.92934e-48	9.06145e-46
Tnfrsf1a	-0.770982	9.27329	424.913	1.05657e-47	1.20252e-45
Mapkapk2	-0.767619	9.33139	310.944	1.07649e-47	1.22023e-45
Emcn	0.627694	9.26358	356.819	1.28429e-47	1.4499e-45
Rpl17	-0.450582	10.7898	209.341	4.17981e-47	4.69985e-45
Rps15a	-0.473876	10.6916	209.061	4.80015e-47	5.37579e-45
Pnp	-0.744071	9.39588	250.147	6.72848e-47	7.50534e-45
Rplp2	-0.437983	10.6804	207.517	1.0312e-46	1.1457e-44
Eno1	-0.590304	9.87352	207.486	1.04705e-46	1.15871e-44
Mylk	0.625955	9.29591	326.541	1.84644e-46	2.0353e-44
Rps5	-0.440135	10.8094	205.297	3.09507e-46	3.39826e-44
Ak4	0.431134	9.49516	205.245	3.17505e-46	3.47246e-44
Slco1a6	0.561565	9.50321	205.199	3.24862e-46	3.5391e-44
Eci3	0.476648	9.41001	226.718	5.21375e-46	5.65792e-44
Rpl10a	-0.491027	10.351	203.747	6.66692e-46	7.20697e-44
Tmsb10	-0.966459	10.2334	203.589	7.20854e-46	7.76249e-44
St8sia1	0.564674	9.27348	410.794	1.06341e-45	1.14074e-43
Frmd4b	0.553376	9.38172	242.219	1.49442e-45	1.59698e-43
Ghr	0.550163	9.88942	201.936	1.63482e-45	1.74037e-43
Manf	0.556863	9.55248	201.915	1.65153e-45	1.7515e-43
Rabac1	-0.629607	9.65914	200.162	3.93563e-45	4.1581e-43
Nampt	-0.670119	9.53455	200.023	4.21631e-45	4.4379e-43
Rps3	-0.452644	10.5508	199.656	5.05876e-45	5.30469e-43
Slc12a3	-0.997905	9.80159	198.843	7.56533e-45	7.90351e-43
Capg	-0.814619	9.27442	376.638	8.1474e-45	8.47995e-43
Rps15	-0.42486	10.6263	198.379	9.52402e-45	9.87606e-43
Itch	0.57662	9.40335	219.336	1.4224e-44	1.46953e-42
Ubald2	-0.679289	9.41652	222.154	1.59724e-44	1.6441e-42
Gm5424	0.549732	9.37594	242.009	2.72023e-44	2.78978e-42
Esm1	0.567103	9.21643	731.045	3.62604e-44	3.70518e-42
Ifitm1	-1.38325	9.38759	196.779	3.91199e-44	3.98284e-42
RP24-64C6.3	0.424087	9.86906	194.649	6.04786e-44	6.13508e-42
Ank3	0.497266	9.50018	194.39	6.87606e-44	6.95003e-42
Ccl20	0.364521	9.19271	2231.37	9.10751e-44	9.17237e-42
Cd24a	-0.82928	9.5919	193.292	1.18467e-43	1.18883e-41
Psmb4	-0.637429	9.48305	200.201	1.27701e-43	1.27692e-41
Gm15638	0.505604	9.32613	295.197	1.2955e-43	1.2908e-41
C1qtnf3	0.564527	9.24029	503.85	1.45388e-43	1.44346e-41
Cfb	-0.736348	9.31852	288.156	1.86446e-43	1.84456e-41
Gcnt1	0.500234	9.74595	192.166	2.07102e-43	2.04171e-41
Lst1	-1.00259	9.31864	270.531	3.46318e-43	3.40218e-41
Syn3	0.596618	9.21702	771.102	4.54768e-43	4.45195e-41
Kcnk5	0.539857	9.38416	219.801	4.64333e-43	4.52975e-41
Slc47a1	0.454454	9.62074	190.461	4.82137e-43	4.6871e-41
Pde4d	0.409586	9.44913	193.418	4.98761e-43	4.83195e-41
Slc17a3	0.490519	9.60105	190.197	5.49686e-43	5.30694e-41
Cd52	-1.01046	9.61245	189.625	7.29722e-43	7.02088e-41
Eci1	-0.688851	9.47161	205.927	7.32636e-43	7.02477e-41
Eif3f	-0.631079	9.65825	189.561	7.53256e-43	7.19783e-41
Rps26	-0.454211	10.4592	189.497	7.77836e-43	7.40744e-41
Kl	0.551539	9.86799	188.303	1.40576e-42	1.33418e-40
Fgb	-1.21188	9.43339	375.206	1.89864e-42	1.79588e-40
Rcan1	0.589645	9.32792	262.164	2.19835e-42	2.07237e-40
Rps23	-0.383543	11.1047	187.055	2.61055e-42	2.45269e-40
Col4a3	0.47694	9.44783	192.233	4.03861e-42	3.78171e-40
Ifitm2	-0.821812	9.81782	186.157	4.0759e-42	3.8039e-40
Alox5ap	-0.980911	9.33288	230.181	4.13265e-42	3.84405e-40
Ifi35	-0.798287	9.30433	333.39	1.35361e-41	1.25492e-39
Sptssb	0.406598	9.20213	1143.29	1.43117e-41	1.32244e-39
Rpl29	-0.450295	10.3757	182.241	2.8456e-41	2.62076e-39
Cyp2j13	0.482598	9.33227	266.089	3.20657e-41	2.94353e-39
Vnn1	-0.791109	9.34578	265.373	3.59542e-41	3.28969e-39
Cyp51	0.576867	9.27358	331.106	3.95899e-41	3.61055e-39
Slc16a14	0.544409	9.21765	734.786	3.98159e-41	3.61937e-39
Oplah	-0.764684	9.34795	273.35	4.29904e-41	3.89529e-39
Psmb9	-0.780676	9.27972	356.606	4.85284e-41	4.3829e-39
Ly6d	0.546259	9.2748	222.947	7.28247e-41	6.5561e-39
Zbp1	-0.838379	9.26562	426.165	1.32584e-40	1.18977e-38
H2-T22	-0.670649	9.3948	209.506	1.77798e-40	1.59042e-38
Rel	0.50079	9.19977	1355.29	2.21951e-40	1.97904e-38
Rps9	-0.412834	10.6929	178.088	2.23522e-40	1.98672e-38
Kap	0.73477	13.3527	178.038	2.29201e-40	2.03075e-38
Fmo5	0.49773	9.27653	334.483	2.47398e-40	2.18506e-38
Insig1	0.619117	9.24748	426.916	3.33297e-40	2.93448e-38
Rpl36	-0.351674	10.9522	176.913	4.0058e-40	3.51581e-38
Dtnbp1	-0.739916	9.335	274.757	6.70148e-40	5.86338e-38
Clic1	-0.649756	9.5556	175.28	9.01115e-40	7.85963e-38
Cyp24a1	0.272658	9.47595	177.121	1.76515e-39	1.5348e-37
Got2	-0.631195	9.49486	181.336	2.77999e-39	2.40972e-37
Upk3a	0.425642	9.20432	931.481	4.03203e-39	3.48423e-37
Rpl3	-0.457365	10.422	171.8	5.07617e-39	4.37301e-37
Rps18	-0.369403	11.103	171.68	5.38927e-39	4.62849e-37
Uqcrb	0.359475	10.7101	171.276	6.58579e-39	5.63881e-37
Ppp1r1a	-0.937061	9.77197	168.652	2.42631e-38	2.0711e-36
Psmb5	-0.573655	9.59994	167.737	3.82259e-38	3.25304e-36
Acaa2	-0.658662	9.53152	168.973	4.18754e-38	3.55281e-36
Rpl10	-0.411441	10.9774	166.949	5.6545e-38	4.78292e-36
Rps21	-0.410419	10.4084	165.777	1.01251e-37	8.53865e-36
Mat2a	0.514523	9.98328	165.519	1.1511e-37	9.67825e-36
Adra2b	0.438952	9.40947	193.54	2.07145e-37	1.73274e-35
Hsph1	0.584142	9.29117	278.134	2.07325e-37	1.73274e-35
Slc13a1	-0.638864	9.89466	163.614	2.96715e-37	2.47245e-35
Hspd1	0.4575	9.70612	162.894	4.24601e-37	3.52759e-35
RP24-362L9.2	0.466046	9.24921	406.423	4.63474e-37	3.83916e-35
Snx29	0.385958	9.38423	202.825	5.35385e-37	4.42174e-35
Macrod2	0.437658	9.42691	173.293	5.71715e-37	4.70791e-35
4931406C07Rik	0.471277	9.86434	162.066	6.40913e-37	5.26225e-35
Ppp1r14b	-0.716406	9.32339	258.412	6.58897e-37	5.39409e-35
Malat1	0.677207	15.9535	161.95	6.7895e-37	5.54205e-35
Cyp4a31	-0.678477	9.69419	161.622	7.99167e-37	6.50438e-35
Snx10	-0.79962	9.28414	352.204	9.69858e-37	7.87075e-35
Gstm1	0.52732	9.79001	160.822	1.18958e-36	9.62599e-35
Rps7	-0.425389	10.5458	160.804	1.20035e-36	9.66542e-35
Psma7	-0.524347	9.74924	160.802	1.20136e-36	9.66542e-35
Acadvl	-0.612565	9.49978	167.272	1.2425e-36	9.96777e-35
Flot1	-0.65031	9.25477	374.662	2.73475e-36	2.18764e-34
Itgb8	0.43117	9.45106	162.285	3.2519e-36	2.59393e-34
Hspb1	0.605928	9.2662	271.236	3.31816e-36	2.63926e-34
Rpl22	-0.483473	10.0411	158.358	4.05284e-36	3.21449e-34
Rpl7a	-0.464678	10.0928	158.276	4.22058e-36	3.33807e-34
Atp5b	-0.362617	10.7724	158.064	4.69117e-36	3.69982e-34
Mpc1	0.37209	10.5433	157.615	5.86618e-36	4.61352e-34
Ass1	0.459096	10.5594	157.24	7.06895e-36	5.54388e-34
Prkag3	0.438773	9.20103	1124.16	7.60163e-36	5.94498e-34
Tmem213	-0.762647	9.74034	155.279	1.87573e-35	1.46286e-33
Rps4x	-0.429182	10.5769	155.108	2.04179e-35	1.58795e-33
Igfbp7	-0.457114	10.5686	154.217	3.18211e-35	2.46794e-33
Pgls	-0.573136	9.51034	159.046	3.50447e-35	2.71045e-33
Acot2	-0.674798	9.36308	193.787	8.41301e-35	6.48891e-33
Timp3	0.465689	10.7403	151.731	1.09643e-34	8.43344e-33
Trpc1	0.475659	9.32841	219.015	1.30323e-34	9.99667e-33
Spint2	-0.554311	9.72513	150.603	1.92296e-34	1.47102e-32
Aprt	-0.593749	9.48949	156.047	2.32537e-34	1.774e-32
Xdh	-0.733876	9.2633	367.271	2.70644e-34	2.0591e-32
S100a10	-0.577006	9.70129	149.543	3.26002e-34	2.47355e-32
Cfl1	-0.542503	9.89015	149.317	3.64759e-34	2.76014e-32
Rpl14	-0.361645	10.7385	147.373	9.60752e-34	7.25044e-32
Rps12-ps3	-0.602554	9.42701	164.877	1.09051e-33	8.20754e-32
Slc5a10	-0.764775	9.33773	216.485	1.60302e-33	1.20325e-31
Rpl7	-0.420178	10.2561	145.733	2.17507e-33	1.62828e-31
Ch25h	0.331136	9.20019	1281.78	2.38912e-33	1.78375e-31
Stat3	-0.657845	9.34384	204.197	2.42279e-33	1.80408e-31
Xaf1	-0.807447	9.29747	298.167	2.68751e-33	1.99588e-31
Gzmb	-1.0186	9.29732	194.231	3.65167e-33	2.70475e-31
Rps3a1	-0.39546	10.5538	144.292	4.4579e-33	3.2932e-31
Gns	-0.592239	9.4073	164.198	8.90449e-33	6.56074e-31
Mrps21	0.366488	10.1399	142.607	1.03244e-32	7.58692e-31
Pxmp4	-0.596795	9.46487	151.465	1.03807e-32	7.60835e-31
Mrpl52	-0.511858	9.65552	142.496	1.09146e-32	7.97874e-31
Eci2	-0.605177	9.43206	166.717	1.11634e-32	8.13942e-31
Col4a4	0.432778	9.52818	142.237	1.24167e-32	9.02969e-31
Tmem26	0.489578	9.21273	637.009	1.42629e-32	1.03454e-30
Tm4sf1	0.485766	9.34212	141.875	1.48684e-32	1.07567e-30
Msrb1	-0.494829	10.1508	141.112	2.17482e-32	1.56935e-30
Gsta2	-0.600671	9.70082	140.936	2.37469e-32	1.70916e-30
Eif4ebp1	-0.663342	9.28882	254.494	2.71927e-32	1.95215e-30
Hadha	-0.639651	9.41982	170.657	3.13382e-32	2.244e-30
Rpl36a	-0.395805	10.3623	140.204	3.42087e-32	2.4433e-30
Tmem229a	0.411738	9.43902	148.832	4.80338e-32	3.42201e-30
Rps14	-0.297837	11.2329	139.329	5.2913e-32	3.76004e-30
Id1	-0.650815	9.30212	195.067	6.13842e-32	4.35097e-30
Bnip3	-0.521449	9.61894	138.853	6.70874e-32	4.74322e-30
Ctsa	-0.634166	9.39564	172.977	7.41175e-32	5.22706e-30
Cotl1	-0.691596	9.53415	137.929	1.06333e-31	7.48017e-30
Cd36	0.495556	9.626	137.818	1.12414e-31	7.88812e-30
Cpeb3	0.460931	9.29727	240.63	1.21726e-31	8.52022e-30
Rpl32	-0.327714	11.2234	137.281	1.46936e-31	1.02591e-29
mt-Nd5	0.370331	11.0479	137.074	1.62845e-31	1.13416e-29
Usp2	0.37997	9.42729	155.804	2.09564e-31	1.45593e-29
Taf10	-0.718558	9.36619	199.352	3.33095e-31	2.30841e-29
Gadd45b	0.451818	9.21017	661.176	4.19256e-31	2.89835e-29
Atp5k	0.301626	10.8132	135.073	4.41862e-31	3.04711e-29
Glrx	-0.610664	9.33964	185.427	4.61725e-31	3.17626e-29
Chp1	-0.583172	9.4211	157.449	5.5301e-31	3.79489e-29
Vegfa	0.406057	9.43069	147.063	6.07237e-31	4.15683e-29
Neat1	0.461441	10.4729	134.01	7.50909e-31	5.12779e-29
Capzb	-0.555615	9.48403	132.741	1.41424e-30	9.63405e-29
Tubb2a	-0.618892	9.27708	244.916	1.49679e-30	1.01716e-28
Junb	0.543479	9.56268	132.61	1.5101e-30	1.02372e-28
Upp1	-0.663801	9.27684	244.132	2.42155e-30	1.63764e-28
Rasip1	0.437219	9.20955	670.849	2.51695e-30	1.69806e-28
Lrrc8a	0.522704	9.33422	175.345	2.61526e-30	1.76015e-28
Rpl27a	-0.344895	10.6955	131.459	2.68185e-30	1.80063e-28
Tnip3	0.334636	9.20095	930.278	2.80508e-30	1.87887e-28
Vim	-0.760712	9.28831	213.177	2.8749e-30	1.92104e-28
H2-DMb1	-0.703146	9.31215	218.217	3.01513e-30	2.00994e-28
Ppp1r16b	0.388533	9.33191	196.8	3.9985e-30	2.65915e-28
Decr1	-0.559949	9.48718	136.947	4.01856e-30	2.66615e-28
Map1lc3b	-0.462542	9.75115	130.424	4.49463e-30	2.97496e-28
Ssbp4	-0.587852	9.24896	316.25	5.45401e-30	3.60145e-28
Rpl5	-0.442181	9.92328	129.923	5.77357e-30	3.80349e-28
Ezr	-0.500735	9.63439	129.74	6.32532e-30	4.15719e-28
Arhgdia	-0.542961	9.46641	137.101	6.81388e-30	4.4678e-28
Gabarapl1	-0.499372	9.99722	129.458	7.28286e-30	4.76414e-28
Hist1h2bc	0.39156	10.1376	129.21	8.24227e-30	5.37918e-28
Rps13	-0.378118	10.4534	128.778	1.02252e-29	6.65782e-28
Ybx1	0.322203	10.8188	128.681	1.07322e-29	6.9717e-28
Sema4c	0.356041	9.19456	1414.58	1.52452e-29	9.88046e-28
Acsl1	-0.573666	9.50981	127.465	1.96959e-29	1.27355e-27
Gnb2	-0.512646	9.57105	127.258	2.18432e-29	1.40914e-27
Serpinh1	0.524318	9.27747	233.156	2.24748e-29	1.44655e-27
Pcx	-0.557649	9.60922	126.784	2.76665e-29	1.77662e-27
Fam13a	0.367295	9.35136	175.818	2.88628e-29	1.8492e-27
Nkg7	-0.667909	9.32482	128.854	2.90262e-29	1.85543e-27
Tpt1	-0.312075	11.419	126.614	3.01188e-29	1.92088e-27
Taldo1	-0.507463	9.56641	126.344	3.44778e-29	2.19388e-27
Pnpla2	-0.592484	9.29832	213.748	4.16272e-29	2.64281e-27
Nt5e	0.516055	9.24061	318.278	4.36458e-29	2.7647e-27
BC021785	0.343654	9.55285	125.396	5.53489e-29	3.4981e-27
Ankrd1	0.261599	9.19708	1084.26	5.55571e-29	3.50335e-27
Tcf15	0.298834	9.18795	2557.15	7.54016e-29	4.74403e-27
Arrdc2	0.427373	9.20097	841.313	8.43176e-29	5.2931e-27
Irf1	0.396306	9.27333	290.306	9.00545e-29	5.6406e-27
Rnf213	-0.782921	9.33226	270.359	1.21674e-28	7.60406e-27
Gbp3	-0.895371	9.29434	303.411	2.57831e-28	1.60774e-26
Adgrg1	-0.614975	9.38203	146.673	2.59043e-28	1.61171e-26
Clec2d	-0.638531	9.36777	174.619	2.91235e-28	1.80798e-26
Pik3r1	-0.599677	9.32239	185.914	3.35379e-28	2.07742e-26
H2-Ab1	-0.639439	9.51947	121.593	3.69977e-28	2.28667e-26
Rnh1	-0.574562	9.35566	163.266	5.21297e-28	3.21482e-26
Limd2	-0.64837	9.28422	199.445	5.41353e-28	3.33116e-26
Slc5a8	0.447655	9.54255	120.812	5.46709e-28	3.35674e-26
Rpl39	-0.321666	10.9172	120.469	6.48735e-28	3.97446e-26
Eef1b2	-0.490772	9.65808	119.091	1.29214e-27	7.89899e-26
Ethe1	0.426361	9.59597	118.908	1.41571e-27	8.63554e-26
Dync1h1	-0.533629	9.40779	135.741	1.78597e-27	1.08703e-25
Ube2m	-0.588252	9.40888	149.165	1.96859e-27	1.19559e-25
Dap	-0.575344	9.31736	183.56	2.13032e-27	1.29101e-25
Psca	0.323251	9.20267	750.954	2.48697e-27	1.50389e-25
Sprr2a3	0.256098	9.18902	1961.2	2.52477e-27	1.52346e-25
Ms4a6c	-0.623353	9.25428	221.391	2.55404e-27	1.53781e-25
Atox1	-0.32302	10.669	117.665	2.63618e-27	1.58386e-25
Pgd	-0.580919	9.29286	206.115	2.70682e-27	1.62282e-25
Sptlc2	-0.575357	9.32519	177.147	3.14056e-27	1.87883e-25
Trp53inp1	0.514276	9.24357	292.838	3.87396e-27	2.31264e-25
Scp2	0.333653	10.5141	116.747	4.17015e-27	2.48417e-25
Cml1	0.320129	9.93015	116.613	4.46081e-27	2.65167e-25
Mgll	-0.64179	9.28751	223.153	5.03333e-27	2.98566e-25
Cdhr5	-0.567888	9.37648	151.931	5.35661e-27	3.17071e-25
Ndufv3	0.317277	10.2458	116.159	5.59763e-27	3.30638e-25
Hlf	0.324244	9.33713	180.609	5.77177e-27	3.40207e-25
Hilpda	0.439065	9.20671	603.14	6.23001e-27	3.66445e-25
Igfbp2	0.232668	9.19146	1141.4	7.03026e-27	4.12648e-25
Msn	-0.530948	9.43211	115.618	7.33669e-27	4.29733e-25
Calca	0.317202	9.18957	1980.15	7.55146e-27	4.4139e-25
Parp9	-0.659883	9.25735	334.089	9.42515e-27	5.49465e-25
Fuom	-0.532609	9.38444	140.321	9.43969e-27	5.49465e-25
Tnfsf9	0.298793	9.18905	2129.81	1.01496e-26	5.8956e-25
Gm853	0.35582	9.20928	500.74	1.06104e-26	6.15051e-25
Tmem72	-0.612087	9.30774	169.081	1.15194e-26	6.66361e-25
Rpl27	-0.358045	10.2775	114.422	1.3343e-26	7.70261e-25
Gm20186	0.406419	9.21719	430.946	1.3931e-26	8.02554e-25
Tsc22d3	0.456566	9.35574	133.601	1.52495e-26	8.76706e-25
Gpi1	-0.515111	9.55203	114.065	1.59541e-26	9.15331e-25
Tap1	-0.674859	9.2603	310.427	1.60427e-26	9.18536e-25
Efhd2	-0.589375	9.27703	203.824	1.84293e-26	1.05303e-24
Clcnkb	-0.588702	9.39089	113.059	2.6389e-26	1.50476e-24
Acot13	0.360299	9.72039	112.94	2.80004e-26	1.59341e-24
mt-Nd3	0.319338	11.1198	112.696	3.16432e-26	1.79705e-24
Pabpc1	-0.479467	9.68276	112.573	3.36492e-26	1.90711e-24
Ptgs2	0.211512	9.18757	2593.18	3.8053e-26	2.15234e-24
Nmi	-0.632935	9.27692	240.442	4.06311e-26	2.29353e-24
Fbxo6	-0.546368	9.25579	258.163	4.19661e-26	2.36412e-24
Osbpl6	0.37136	9.35942	155.667	5.06705e-26	2.84874e-24
Psmd8	-0.480853	9.45439	115.466	5.16269e-26	2.89669e-24
Samd9l	0.388629	9.48849	112.206	5.46408e-26	3.05967e-24
Cda	-0.468056	9.94605	111.389	6.08516e-26	3.40065e-24
Aqp3	0.475658	9.33588	111.273	6.44714e-26	3.59576e-24
Cyp2j5	0.393925	10.0197	111.244	6.54286e-26	3.64189e-24
Tkfc	-0.518958	9.52765	110.925	7.67647e-26	4.2644e-24
Rps27rt	-0.436684	9.76219	110.915	7.71384e-26	4.27667e-24
Rab7	-0.452207	9.5806	110.705	8.56817e-26	4.74094e-24
Acmsd	0.325522	9.28158	220.38	9.06647e-26	5.00677e-24
Parp12	-0.578322	9.23955	352.803	1.00568e-25	5.54271e-24
Smagp	-0.543697	9.36549	140.111	1.18854e-25	6.53342e-24
Hmgcs1	0.348936	9.69269	110.049	1.1901e-25	6.53342e-24
Gbp7	-0.799813	9.3582	220.199	2.48585e-25	1.36201e-23
Flt1	0.435709	9.22556	326.429	2.5069e-25	1.37086e-23
Scoc	0.381875	9.45943	109.716	2.63048e-25	1.43564e-23
Rpl4	-0.376944	10.2897	108.449	2.65072e-25	1.44387e-23
Arhgap5	0.438637	9.34351	147.946	2.82563e-25	1.53616e-23
Mpc2	0.296204	10.5316	108.299	2.85706e-25	1.55023e-23
Irgm2	-0.663358	9.26372	303.545	3.32731e-25	1.80189e-23
Rnaset2b	-0.525446	9.38619	132.435	3.70927e-25	2.00487e-23
Tmsb4x	-0.730648	11.2253	107.159	5.05783e-25	2.7285e-23
Grcc10	0.373817	9.67577	107.066	5.29724e-25	2.85216e-23
Ptpn18	-0.641062	9.29685	172.523	5.44915e-25	2.92832e-23
S1pr1	0.385552	9.21761	417.853	5.74679e-25	3.08235e-23
Cd53	-0.578095	9.26981	184.005	6.05303e-25	3.2404e-23
Ubb	-0.288889	11.2809	106.464	7.16089e-25	3.82616e-23
Gm10076	0.243507	11.3844	106.275	7.87309e-25	4.19868e-23
Socs2	-0.570024	9.27946	198.794	8.45948e-25	4.50283e-23
Irf8	-0.552135	9.26585	195.408	9.38964e-25	4.98845e-23
Cmbl	0.261229	9.49055	107.72	9.56592e-25	5.07247e-23
Hspa8	0.291988	10.6444	105.881	9.59152e-25	5.07643e-23
Hk1	-0.572417	9.2759	200.013	1.09916e-24	5.80648e-23
Atp6v0a4	-0.500723	9.45585	111.499	1.23784e-24	6.52674e-23
Minos1	0.296499	10.2761	105.217	1.33725e-24	7.03764e-23
S100a4	-0.740987	9.2724	191	1.42968e-24	7.50997e-23
Snhg6	-0.551355	9.32352	163.372	1.98753e-24	1.04207e-22
Rps27a	-0.305903	10.9071	104.165	2.26519e-24	1.18544e-22
Cited2	0.40537	9.43218	103.726	2.8228e-24	1.47449e-22
H6pd	-0.514694	9.35228	134.7	3.25803e-24	1.69867e-22
Mien1	0.358526	9.68113	103.184	3.70303e-24	1.92709e-22
Tmem140	-0.580174	9.35231	147.126	4.27073e-24	2.2184e-22
Pdxk	-0.57068	9.31843	164.831	4.68394e-24	2.42854e-22
Pla2g7	-0.560297	9.23587	296.771	4.89692e-24	2.53427e-22
Acsl4	-0.554359	9.304	169.326	4.96996e-24	2.56732e-22
Anxa2	-0.57486	9.34599	111.212	5.36946e-24	2.76662e-22
Prdx1	0.28932	11.0776	102.44	5.37553e-24	2.76662e-22
Gpx1	-0.353328	12.103	102.288	5.80206e-24	2.98066e-22
Paqr5	-0.498683	9.44094	101.996	6.71771e-24	3.44473e-22
Cks2	0.344282	9.52819	101.961	6.83568e-24	3.49882e-22
Aldh1l1	-0.477827	9.48155	101.945	6.89124e-24	3.52082e-22
Ggct	0.42677	9.2773	192.896	7.27973e-24	3.71253e-22
Sectm1b	-0.553248	9.30105	162.134	1.00514e-23	5.11669e-22
Il18bp	-0.484313	9.2221	401.111	1.05521e-23	5.36184e-22
C2	-0.505597	9.24082	272.316	1.08017e-23	5.47873e-22
Tgm2	-0.502975	9.39041	116.811	1.30577e-23	6.61104e-22
Eps8	0.372119	9.40489	111.766	1.33692e-23	6.7565e-22
Npm1	-0.432647	9.69882	100.457	1.45283e-23	7.32907e-22
Ifitm6	-1.13277	9.31599	131.818	1.45735e-23	7.33864e-22
Fh1	-0.516236	9.34321	139.45	1.64218e-23	8.25453e-22
Rpl37	-0.251425	11.2638	99.952	1.87106e-23	9.38816e-22
Gbp6.1	-0.807819	9.26237	281.064	1.908e-23	9.55639e-22
Cyp26b1	0.251232	9.19022	1661.61	2.37435e-23	1.18709e-21
Mrpl27	-0.470933	9.44725	110.869	3.17461e-23	1.58436e-21
Ms4a4c	-0.48565	9.22268	347.746	5.55112e-23	2.76549e-21
Cpt2	-0.526931	9.33352	144.299	6.67287e-23	3.31842e-21
Me1	0.368596	9.54777	97.2005	7.43524e-23	3.69099e-21
Ascc1	0.278776	9.53895	97.1606	7.58563e-23	3.75898e-21
Use1	-0.494944	9.44674	110.315	8.04562e-23	3.97988e-21
Rpl34	-0.296345	10.662	96.9856	8.28143e-23	4.0893e-21
Pigr	-0.5787	9.32247	138.816	1.00195e-22	4.93886e-21
Ube2l6	-0.634322	9.25021	287.757	1.04688e-22	5.15125e-21
Aes	-0.453233	9.81439	96.4569	1.07965e-22	5.30314e-21
Prelid1	-0.448921	9.69759	96.3505	1.13885e-22	5.58417e-21
Itm2b	-0.316617	10.9263	96.2442	1.2012e-22	5.8796e-21
Cd200	-0.545408	9.37857	96.071	1.31027e-22	6.40226e-21
Gm26737	0.346491	9.20218	575.079	1.36151e-22	6.63018e-21
Hp	-1.30547	9.37783	102.317	1.36322e-22	6.63018e-21
D630023F18Rik	0.352882	9.27314	187.515	1.36402e-22	6.63018e-21
Got1	-0.499594	9.35724	124.296	1.41598e-22	6.87082e-21
Serping1	-0.534224	9.22422	391.325	1.47228e-22	7.13163e-21
Ifna4	0.142719	9.18375	1756.84	1.4887e-22	7.19875e-21
Cox6b2	-0.60136	9.26768	205.399	1.5023e-22	7.25198e-21
Ech1	-0.401057	9.86755	95.3899	1.84394e-22	8.88581e-21
Tap2	-0.560091	9.25428	239.546	2.07029e-22	9.95945e-21
Pecr	0.330358	9.70836	95.1354	2.09508e-22	1.00614e-20
Epcam	-0.501147	9.37213	97.8633	2.10936e-22	1.01127e-20
Parp10	-0.525386	9.25132	242.118	2.17518e-22	1.04104e-20
Rpl26	-0.263562	10.9832	95.0018	2.24042e-22	1.07043e-20
Gmfg	-0.564861	9.29803	138.851	2.36597e-22	1.12849e-20
Misp	-0.452204	9.21847	407.142	2.50277e-22	1.19171e-20
Agpat3	-0.505337	9.47636	105.446	2.54985e-22	1.21207e-20
Tuba1b	-0.503566	9.36355	106.487	2.56436e-22	1.2169e-20
Comt	-0.40838	9.95294	94.5866	2.75927e-22	1.30718e-20
Mep1a	0.41535	9.79523	94.5236	2.84792e-22	1.34689e-20
Slc25a22	-0.508788	9.23371	298.994	2.88162e-22	1.36053e-20
Chordc1	0.438384	9.2542	211.454	2.93585e-22	1.3838e-20
Card19	-0.48794	9.35654	121.517	2.94815e-22	1.38727e-20
Erich4	0.301778	9.44284	101.292	3.06628e-22	1.44043e-20
Fam133b	0.410245	9.33891	129.944	4.752e-22	2.22858e-20
Dlc1	0.338645	9.19837	714.516	6.48872e-22	3.03798e-20
Pttg1	-0.444915	9.43891	96.4409	7.04684e-22	3.29378e-20
Rtn4	-0.451366	9.43006	98.0708	7.48072e-22	3.49075e-20
Cyp2a5	-0.797597	9.35361	130.736	8.02706e-22	3.73946e-20
Rps17	-0.270677	10.7755	92.0419	9.89674e-22	4.6028e-20
Tfec	0.386448	9.25819	209.335	1.10524e-21	5.13174e-20
Slc51b	-0.462103	9.40277	100.209	1.19691e-21	5.54032e-20
Rbpms	-0.473502	9.37912	113.554	1.19719e-21	5.54032e-20
Esam	0.435927	9.22765	266.197	1.34033e-21	6.19251e-20
Pla2g16	-0.503334	9.27683	169.097	1.37822e-21	6.35705e-20
Znfx1	-0.574235	9.29254	185.451	1.49625e-21	6.89014e-20
Fxyd5	-0.610833	9.31091	120.379	1.59773e-21	7.34536e-20
Ctdsp2	-0.517749	9.29595	160.867	1.77064e-21	8.12695e-20
Eif5a	-0.362998	9.91248	90.7806	1.86424e-21	8.54256e-20
Npnt	0.387304	9.36258	100.659	1.96122e-21	8.96828e-20
Ubxn1	-0.430029	9.48972	94.2163	1.96355e-21	8.96828e-20
AI413582	-0.510194	9.27371	179.009	2.06885e-21	9.43382e-20
Bhlhe41	0.355314	9.19992	643.353	2.09662e-21	9.5449e-20
Plvap	0.332482	9.32135	94.0029	2.12318e-21	9.65011e-20
Ppia	-0.271992	10.8421	90.5135	2.13187e-21	9.67394e-20
Cd82	-0.512153	9.30045	141.332	2.1903e-21	9.92299e-20
Gna13	-0.467625	9.38014	109.771	2.4454e-21	1.10608e-19
Slc3a2	-0.443253	9.45351	90.0222	2.72839e-21	1.23209e-19
H2-DMa	-0.537676	9.24639	230.386	2.84876e-21	1.28437e-19
Bcl6b	0.29017	9.19117	1286.24	2.89691e-21	1.30398e-19
Tmbim6	-0.330963	10.2529	89.8521	2.97173e-21	1.33551e-19
Stat1	-0.602533	9.31075	165.759	3.0856e-21	1.38446e-19
Hpn	-0.439123	9.58812	89.7721	3.09355e-21	1.38581e-19
Cd83	0.293956	9.19198	1059.1	3.18451e-21	1.42428e-19
Atp5j2	0.228101	10.8636	89.6155	3.34664e-21	1.49441e-19
Lamp2	-0.366848	10.1341	89.4872	3.56952e-21	1.59139e-19
Bdh2	0.329597	9.6854	89.441	3.65324e-21	1.62613e-19
Iigp1	-0.966546	9.49437	125.213	4.04777e-21	1.79888e-19
Prr13	-0.453121	9.57841	89.0126	4.5304e-21	2.01018e-19
2200002D01Rik	-0.495964	9.36903	105.838	4.98807e-21	2.20975e-19
Fos	0.469254	9.48068	88.7691	5.1198e-21	2.26452e-19
Ndufaf4	0.359601	9.40283	98.546	6.57631e-21	2.90416e-19
C1d	0.359083	9.57712	88.0948	7.18398e-21	3.16751e-19
Timd2	-0.462634	9.35797	107.74	7.23643e-21	3.18562e-19
Pawr	0.344692	9.21459	378.166	7.55394e-21	3.32018e-19
Apom	0.393109	9.37214	94.6564	7.95205e-21	3.48968e-19
Guca2b	-0.408616	11.4261	87.8579	8.09189e-21	3.54549e-19
Slc25a4	-0.41942	9.85738	87.7282	8.63687e-21	3.77836e-19
Pth1r	-0.434586	9.916	87.7146	8.69631e-21	3.79843e-19
Rac1	-0.420576	9.53525	87.6856	8.8238e-21	3.84811e-19
Capns1	-0.418327	9.52584	87.6025	9.19992e-21	4.0059e-19
Mvp	-0.484574	9.25297	205.953	9.59881e-21	4.1731e-19
Nrarp	0.3082	9.19554	810.803	1.02856e-20	4.46476e-19
Ostf1	-0.441266	9.48017	87.2109	1.12003e-20	4.85428e-19
Fhl1	0.315816	9.37025	115.791	1.20021e-20	5.19374e-19
Vasp	-0.524601	9.29853	134.999	1.26626e-20	5.47111e-19
Gnas	-0.393941	9.85555	86.9167	1.29852e-20	5.60184e-19
Ddb1	-0.484876	9.3744	113.616	1.3756e-20	5.92523e-19
Dtx3l	-0.606221	9.27922	211.655	1.50825e-20	6.48664e-19
Ramp3	0.396365	9.22599	272.109	1.63935e-20	7.03964e-19
Cbr1	-0.561029	9.31419	145.139	1.65563e-20	7.09869e-19
Rps11	-0.279271	10.7408	86.2286	1.83493e-20	7.85539e-19
Mmp13	0.118224	9.18778	1233.07	1.98194e-20	8.4718e-19
Slc10a2	0.2721	9.27829	164.98	2.00304e-20	8.54896e-19
Lrrk2	0.321236	9.31531	141.26	2.01688e-20	8.5949e-19
Kctd1	-0.486336	9.25488	186.975	2.51454e-20	1.06994e-18
AA467197	-0.622201	9.23762	238.935	2.84458e-20	1.20854e-18
Hfe	-0.471121	9.23188	265.397	2.93901e-20	1.24676e-18
Pebp1	-0.336675	10.0665	85.2036	3.07159e-20	1.30103e-18
Apoe	-0.541305	9.50751	85.1705	3.12318e-20	1.32089e-18
Ccnd3	-0.540436	9.34248	121.379	3.56621e-20	1.50598e-18
Wbp2	-0.483841	9.41408	104.201	3.62004e-20	1.52641e-18
Psmd3	-0.501327	9.38873	110.892	3.83168e-20	1.61322e-18
2020-03-02	-0.407612	9.59119	84.7347	3.88821e-20	1.63457e-18
Ifit1	0.0114519	9.78675	111.579	3.89672e-20	1.63569e-18
Stc1	0.30944	9.21069	398.104	3.99415e-20	1.67408e-18
Grem2	0.248634	9.19425	904.032	4.62689e-20	1.93638e-18
Defb1	-0.598677	10.5203	84.2293	5.01282e-20	2.09476e-18
Ap2s1	-0.436934	9.45842	93.2744	5.15814e-20	2.15227e-18
Vwa5a	-0.510052	9.26027	192.668	6.19123e-20	2.5795e-18
Acaa1a	-0.44429	9.45722	91.4554	6.21846e-20	2.58699e-18
Fibp	-0.502901	9.25856	197.06	6.43615e-20	2.67358e-18
Fah	-0.470186	9.56176	83.6866	6.58566e-20	2.73164e-18
Ppa1	-0.513883	9.27967	161.666	6.69847e-20	2.77432e-18
Hip1r	-0.458717	9.24395	216.544	6.76057e-20	2.7959e-18
Hs3st1	0.275979	9.19225	959.891	7.08699e-20	2.92657e-18
Nudt19	0.345726	9.9301	83.4665	7.35633e-20	3.03332e-18
Get4	-0.502189	9.29269	151.882	7.66393e-20	3.15551e-18
Gm4131	0.327297	9.21719	330.179	7.86577e-20	3.23386e-18
Epb41l4aos	-0.536466	9.28426	163.303	8.40415e-20	3.45014e-18
Ptpn1	-0.537717	9.29554	137.155	8.77662e-20	3.59777e-18
Dbi	-0.304825	11.8108	82.8776	9.89177e-20	4.04897e-18
Aadat	0.337327	9.32882	111.207	1.18256e-19	4.83348e-18
Neurl3	0.331128	9.20512	489.96	1.29197e-19	5.27299e-18
Brk1	-0.435235	9.47839	88.0829	1.37271e-19	5.59435e-18
Atp2a2	0.348435	9.61971	82.2097	1.38408e-19	5.6325e-18
Tob2	0.402776	9.32648	117.64	1.45692e-19	5.92031e-18
Ptgfr	-0.487243	9.28742	126.121	1.51086e-19	6.13058e-18
Rab5c	-0.392884	9.60532	81.9773	1.55576e-19	6.30365e-18
Timm8a1	0.395813	9.22495	269.023	1.62017e-19	6.55513e-18
Atp5g2	-0.302356	10.2137	81.5633	1.91591e-19	7.74051e-18
Rpl24	-0.248184	10.7882	81.5336	1.94482e-19	7.84599e-18
Flot2	-0.462117	9.25241	192.906	1.97266e-19	7.94683e-18
Bcl2l1	-0.455273	9.36815	106.385	2.02174e-19	8.13286e-18
Rpl18a	-0.254838	11.1214	81.4346	2.04406e-19	8.21085e-18
Uqcr11	0.217833	11.1046	81.4248	2.05415e-19	8.23956e-18
mt-Co3	0.26015	15.3034	81.4167	2.06256e-19	8.26143e-18
Rnf114	-0.476139	9.27177	166.276	2.08839e-19	8.35298e-18
3110045C21Rik	0.321024	9.21627	326.689	2.17992e-19	8.7066e-18
0610011F06Rik	0.321329	9.77019	81.1358	2.3757e-19	9.47505e-18
Npc2	-0.411942	9.51759	81.1	2.41881e-19	9.63328e-18
Psma2	-0.389372	9.5537	81.0485	2.4823e-19	9.87209e-18
Qdpr	0.275887	9.68171	81.0173	2.52167e-19	1.00144e-17
Mgst3	-0.395153	9.68597	80.9578	2.59825e-19	1.03039e-17
Cldn19	-0.488092	9.22829	266.06	2.762e-19	1.09378e-17
Nr4a3	0.192897	9.18602	2561.48	3.07675e-19	1.21671e-17
G3bp2	-0.441916	9.39195	95.4357	3.32847e-19	1.3144e-17
Wfdc15b	-0.624909	9.96765	80.4193	3.40679e-19	1.34343e-17
1110008P14Rik	-0.419469	9.43703	86.2927	3.44176e-19	1.35531e-17
Hsp90ab1	0.289424	10.096	80.2101	3.78495e-19	1.48836e-17
Ccl22	0.172473	9.18788	1365.36	3.83619e-19	1.50639e-17
Stard10	-0.446127	9.74157	80.1479	3.9054e-19	1.53142e-17
Gltscr2	-0.447881	9.41542	90.4863	4.18238e-19	1.63774e-17
Cirbp	-0.471805	9.3404	113.368	4.30081e-19	1.68176e-17
Lpin1	0.391331	9.31496	118.938	4.4922e-19	1.75415e-17
Tspan4	-0.476448	9.29372	140.457	4.62306e-19	1.80274e-17
Cd69	0.344724	9.20555	441.496	4.70687e-19	1.83287e-17
Samm50	-0.478725	9.39409	104.455	4.89226e-19	1.90241e-17
Acat3	-0.494707	9.23925	236.636	4.95297e-19	1.92335e-17
Slc2a2	0.26895	9.48237	79.598	5.15045e-19	1.99726e-17
Ddx5	0.2862	10.2028	79.5184	5.36092e-19	2.076e-17
Gm26825	0.290943	9.19416	806.126	5.68141e-19	2.19578e-17
BC026585	0.303234	9.52926	79.4015	5.6859e-19	2.19578e-17
Gpx6	-0.478808	9.25032	176.538	5.70219e-19	2.19903e-17
Trim25	-0.50153	9.30764	134.89	6.23394e-19	2.4008e-17
Psmg4	-0.450788	9.35735	105.761	6.3343e-19	2.4361e-17
Mfsd2a	0.254348	9.19849	658.709	6.35939e-19	2.44239e-17
Ap2m1	-0.386223	9.56776	79.0381	6.82706e-19	2.61841e-17
Bola2	-0.368972	9.62704	78.963	7.09004e-19	2.71555e-17
Kars	-0.455983	9.25888	175.646	7.74383e-19	2.96191e-17
Tspan33	-0.580282	9.28153	166.85	7.83403e-19	2.99232e-17
Psma6	-0.41961	9.4077	88.6361	1.15564e-18	4.40812e-17
Sord	0.219607	10.0831	77.9071	1.2064e-18	4.59547e-17
Drap1	-0.419119	9.44651	84.95	1.45863e-18	5.54873e-17
Alpl	-0.563577	9.46419	84.3197	1.47542e-18	5.60499e-17
Aldh2	-0.38983	9.72767	77.4802	1.49566e-18	5.6742e-17
Bak1	-0.403627	9.22429	267.409	1.52444e-18	5.77556e-17
Gm42726	0.329274	9.20288	511.985	1.60067e-18	6.05616e-17
Cyp4b1	0.372625	10.2496	77.2604	1.67071e-18	6.31261e-17
Oxct1	0.32577	9.91538	77.2541	1.67601e-18	6.32411e-17
Guk1	-0.382513	9.53965	77.2111	1.71275e-18	6.45405e-17
Pofut2	-0.466329	9.28393	144.117	1.81301e-18	6.82268e-17
Coro1b	-0.503838	9.28167	149.012	1.83978e-18	6.91412e-17
H13	-0.444759	9.3761	97.9564	1.86522e-18	7.00034e-17
Rdh5	0.39497	9.23059	229.388	1.97496e-18	7.40227e-17
S100a9	-2.23178	10.4578	76.8449	2.05957e-18	7.70908e-17
Uqcrc1	-0.35978	9.76284	76.8156	2.09016e-18	7.81311e-17
Retsat	-0.54746	9.37459	100.38	2.10983e-18	7.87612e-17
Pfn1	-0.335169	10.5589	76.7059	2.2089e-18	8.23498e-17
Map3k1	-0.475719	9.34592	107.75	2.2668e-18	8.4396e-17
Prr7	0.244554	9.18861	1547	2.29888e-18	8.54767e-17
Sdf2l1	0.404569	9.28059	132.227	2.32696e-18	8.6406e-17
Slc16a9	0.257945	9.29364	136.692	2.40102e-18	8.90382e-17
Sox7	0.24017	9.19038	1236.64	2.41663e-18	8.94986e-17
Trafd1	-0.471926	9.24096	222.014	2.58154e-18	9.54796e-17
Ppp2r4	-0.529134	9.31788	131.301	2.99553e-18	1.10645e-16
H1f0	-0.410984	9.48939	76.0699	3.04293e-18	1.12248e-16
Fam49b	-0.502429	9.27773	133.07	3.33384e-18	1.22817e-16
Dazap2	-0.369513	9.62178	75.8771	3.35317e-18	1.23367e-16
Ifna16	0.113874	9.18347	1641.84	3.48552e-18	1.28068e-16
H3f3a	-0.32674	10.1175	75.4436	4.17143e-18	1.53069e-16
Serpinb9	-0.510425	9.27366	126.724	4.24216e-18	1.55461e-16
Ptpn6	-0.507222	9.2574	162.813	4.28571e-18	1.56851e-16
Snhg12	-0.492418	9.26803	163.018	4.34683e-18	1.58881e-16
Oasl2	-0.6232	9.26157	195.3	4.46042e-18	1.6282e-16
Acaa1b	-0.639311	9.81537	75.1355	4.87182e-18	1.77606e-16
Wwc1	-0.438711	9.415	82.4616	4.90003e-18	1.78402e-16
Nfil3	-0.408558	9.22253	280.604	6.30152e-18	2.29103e-16
Gnai2	-0.45084	9.4349	74.6224	6.30897e-18	2.29103e-16
Ncl	-0.398346	9.44311	77.3847	7.28699e-18	2.64276e-16
Mtch1	-0.4806	9.3854	97.4317	7.73225e-18	2.79781e-16
Tmem64	0.336541	9.34908	103.285	7.7345e-18	2.79781e-16
Clec4a3	-0.488695	9.2223	290.612	7.76984e-18	2.80697e-16
Eif4h	-0.471304	9.36323	103.079	7.96454e-18	2.8736e-16
Gm9844	-0.581883	9.25372	219.643	7.98401e-18	2.87691e-16
Slc33a1	0.347424	9.37139	91.7558	8.39457e-18	3.02097e-16
Gsr	-0.382092	9.68842	73.879	9.17581e-18	3.29787e-16
Mvb12a	-0.446746	9.34942	103.008	9.51955e-18	3.41703e-16
Cwh43	-0.532531	9.25435	161.272	1.09383e-17	3.92127e-16
Itgam	-0.407289	9.21192	380.176	1.18454e-17	4.24101e-16
Chac2	0.349127	9.31959	109.892	1.26135e-17	4.51024e-16
Anxa1	-0.460692	9.23461	192.41	1.37628e-17	4.91492e-16
Upk1a	0.218577	9.19326	813.561	1.38371e-17	4.93517e-16
S100a13	-0.41712	9.39827	76.417	1.42558e-17	5.07804e-16
Krt19	0.262944	9.20216	422.218	1.49454e-17	5.31693e-16
Plcb1	0.287058	9.26061	168.241	1.52502e-17	5.41847e-16
Fam214a	0.336896	9.27033	148.736	1.5414e-17	5.46974e-16
Mir155hg	0.178159	9.18696	2087.26	1.57943e-17	5.59758e-16
Rps29	-0.196981	11.7662	72.7906	1.58812e-17	5.62128e-16
Hnf1aos1	0.3108	9.23537	213.558	1.81558e-17	6.41827e-16
Steap2	-0.416129	9.44913	72.4959	1.84246e-17	6.50508e-16
Idnk	-0.437277	9.37087	94.6002	1.91061e-17	6.73719e-16
Vps8	0.309245	9.22904	228.15	1.92678e-17	6.78567e-16
Cald1	0.339832	9.20827	347.251	2.06327e-17	7.25721e-16
Stard5	-0.413653	9.39455	84.8875	2.06884e-17	7.26766e-16
Rab11b	-0.409114	9.38847	86.5025	2.33896e-17	8.20628e-16
Creg1	-0.444619	9.36041	93.0662	2.5596e-17	8.96918e-16
2020-03-05	-0.395838	9.42977	77.9944	2.60426e-17	9.11427e-16
Hck	-0.483463	9.22098	289.38	3.18804e-17	1.11434e-15
Atp5d	-0.257576	10.453	71.3241	3.3265e-17	1.16129e-15
Selplg	-0.501721	9.24646	166.462	3.51758e-17	1.22647e-15
Anxa7	-0.40542	9.38491	83.6607	4.65887e-17	1.62238e-15
Tuba1c	-0.449327	9.29437	119.469	4.67454e-17	1.62581e-15
Anapc5	-0.473724	9.37598	97.5672	4.84088e-17	1.68158e-15
Nfkbid	0.272827	9.19187	908.979	5.19886e-17	1.80369e-15
Atpif1	0.241156	10.6719	70.4327	5.21455e-17	1.80689e-15
Tmco1	0.315858	9.62082	70.1985	5.86839e-17	2.03094e-15
Snx31	0.227379	9.1948	600.753	6.17865e-17	2.13568e-15
Rnaset2a	-0.436938	9.34607	95.2889	6.76156e-17	2.33428e-15
Abhd16a	-0.45202	9.29801	122.786	7.03323e-17	2.42508e-15
Cetn2	0.357919	9.34476	92.578	7.31078e-17	2.51768e-15
Acat1	0.302565	9.67913	69.7372	7.40596e-17	2.54732e-15
Dbnl	-0.437483	9.27188	137.483	7.51473e-17	2.58156e-15
Eif3i	-0.441669	9.41396	84.2643	7.97288e-17	2.7356e-15
Ppp1ca	-0.354333	9.65646	69.5511	8.13482e-17	2.78774e-15
Bri3	-0.310232	9.93145	69.3372	9.06214e-17	3.10173e-15
Kazn	-0.490931	9.27152	144.928	9.20215e-17	3.14581e-15
Sult1a1	-0.366113	9.21632	284.066	9.29344e-17	3.17314e-15
Psat1	-0.454983	9.31196	105.512	9.60259e-17	3.2747e-15
Nrbp2	-0.430515	9.23757	196.538	1.00819e-16	3.43397e-15
Fam63a	-0.450013	9.33253	101.72	1.06865e-16	3.6355e-15
Btg2	0.364693	9.36883	70.9931	1.12144e-16	3.81043e-15
H2-Eb1	-0.460026	9.36559	68.8188	1.17709e-16	3.99469e-15
Fkbp4	0.288967	9.44455	80.2196	1.25832e-16	4.2652e-15
Arpc5	-0.380831	9.48957	68.5974	1.31623e-16	4.45609e-15
Cpt1a	-0.37611	9.49004	68.5528	1.34618e-16	4.55198e-15
Atp5a1	-0.269369	10.4404	68.5467	1.35038e-16	4.56067e-15
Slc27a2	0.358535	10.9495	68.5032	1.38032e-16	4.65617e-15
Mfsd4	-0.480046	9.29581	107.314	1.48158e-16	4.99174e-15
Snx2	-0.424944	9.31401	103.703	1.59933e-16	5.38197e-15
Fcgrt	-0.404863	9.46639	72.6327	1.64374e-16	5.52478e-15
Lrrc32	0.254414	9.19103	938.235	1.66874e-16	5.60207e-15
Cyp4a12b	-0.516293	9.24127	204.951	1.70982e-16	5.73311e-15
Hadhb	-0.38178	9.48007	68.655	1.74634e-16	5.84858e-15
Pold4	-0.481246	9.26836	145.457	1.77473e-16	5.93655e-15
Spint1	-0.445512	9.29767	115.516	1.96624e-16	6.56932e-15
Gm10036	-0.431964	9.3065	110.35	2.06562e-16	6.89311e-15
Hsd11b2	0.438797	9.48621	67.6602	2.11228e-16	7.04043e-15
1810009A15Rik	0.331038	9.20869	334.821	2.1933e-16	7.30177e-15
Slc6a15	0.350743	9.22216	235.054	2.45794e-16	8.17307e-15
Pirb	-0.460514	9.22085	273.975	2.4658e-16	8.18949e-15
Gm12840	0.271449	9.20141	454.006	2.53565e-16	8.41152e-15
Mal	-0.480442	9.46856	67.1493	2.73377e-16	9.05801e-15
Ogfr	-0.444396	9.25732	158.383	2.80529e-16	9.284e-15
Mif4gd	-0.455188	9.35571	93.8825	2.88751e-16	9.53972e-15
2500002B13Rik	0.309816	9.23433	199.762	2.88938e-16	9.53972e-15
Svbp	-0.424174	9.30857	105.818	3.01441e-16	9.94082e-15
Ces1d	-0.493204	9.40845	78.0147	3.04127e-16	1.00176e-14
Igfbp3	0.368008	9.28787	85.2204	3.05521e-16	1.00517e-14
Scand1	-0.325987	9.76142	66.8139	3.23812e-16	1.0641e-14
Abhd6	-0.382701	9.21942	265.455	3.28646e-16	1.07871e-14
Pdk4	-0.50802	9.36907	79.6469	3.52846e-16	1.15679e-14
Mrpl42	0.280127	9.86852	66.6264	3.55957e-16	1.16562e-14
Tcea3	0.143617	9.52382	66.6007	3.60607e-16	1.17947e-14
Trim30a	-0.665735	9.30751	150.522	3.70803e-16	1.21141e-14
Ltc4s	-0.429712	9.23597	174.41	4.02247e-16	1.3126e-14
Fxyd2	0.229431	12.9102	66.3692	4.05323e-16	1.3211e-14
2810474O19Rik	0.294531	9.42903	70.7537	4.09072e-16	1.33177e-14
Pgk1	0.35716	9.35979	85.1396	4.134e-16	1.34429e-14
Rgs5	0.257466	9.20114	413.214	4.3972e-16	1.42822e-14
Cox7a2l	-0.345153	9.78408	66.1977	4.4199e-16	1.43393e-14
Gstp1	0.341697	9.51819	66.1229	4.59007e-16	1.48742e-14
Fcgr3	-0.360199	9.20962	343.802	4.98e-16	1.61191e-14
Lsp1	-0.48467	9.27189	111.843	5.11185e-16	1.65267e-14
F2r	0.331372	9.21301	272.372	5.55965e-16	1.79537e-14
Gm13855	0.222318	9.19994	491.865	5.72538e-16	1.84676e-14
Abhd17a	-0.523012	9.33216	107.863	5.98409e-16	1.92799e-14
Acta2	0.330094	9.21371	234.34	6.27653e-16	2.01989e-14
Psma1	-0.359437	9.45575	66.6255	6.3877e-16	2.0533e-14
Haao	0.208698	9.37707	85.8924	6.50523e-16	2.08869e-14
Ubd	-0.860933	9.33913	131.53	6.78104e-16	2.17475e-14
Gem	0.282566	9.19614	595.142	6.90448e-16	2.21181e-14
Sod2	-0.284368	10.1145	65.2981	6.96156e-16	2.22754e-14
Pdzk1	0.239512	9.98835	65.2792	7.0284e-16	2.24636e-14
Vegfb	-0.552871	9.28329	133.566	7.08636e-16	2.2623e-14
Pxk	-0.417379	9.25702	147.282	7.38525e-16	2.35504e-14
Glyctk	0.21152	9.32602	104.062	7.71628e-16	2.4578e-14
Laptm5	-0.547288	9.25496	144.675	8.19169e-16	2.60626e-14
Ifnb1	0.102011	9.18424	1525.05	8.48522e-16	2.69659e-14
Gda	-0.445491	9.22887	208.466	8.64253e-16	2.74346e-14
Atxn1	0.32304	9.30541	104.294	9.59069e-16	3.041e-14
Hn1	-0.411284	9.32309	84.8072	9.64089e-16	3.05346e-14
Timm10b	-0.349816	9.4931	64.4605	1.06283e-15	3.36237e-14
Sh3tc1	-0.444609	9.27153	132.934	1.08524e-15	3.4294e-14
Muc1	-0.395187	9.22061	248.689	1.15063e-15	3.63194e-14
Pcolce	-0.451517	9.27499	117.882	1.19672e-15	3.77316e-14
Krt15	0.112249	9.18663	1169.86	1.20837e-15	3.80562e-14
Psma5	-0.366821	9.40767	70.3785	1.24289e-15	3.90993e-14
Fabp3	-0.431055	9.49387	64.0569	1.30327e-15	4.09529e-14
Ddx58	-0.494515	9.26609	157.639	1.31868e-15	4.13905e-14
Cnppd1	-0.453498	9.29281	117.738	1.33314e-15	4.17977e-14
Tubb2b	-0.365164	9.22244	219.462	1.3508e-15	4.23038e-14
Sorl1	-0.421327	9.32425	90.9441	1.39932e-15	4.37746e-14
Naca	-0.289997	10.069	63.8232	1.46661e-15	4.58282e-14
Dnase1	0.320516	9.69057	63.5437	1.68905e-15	5.27203e-14
Ms4a6b	-0.37764	9.22848	169.536	1.94646e-15	6.06871e-14
Slc27a1	-0.466463	9.27248	133.095	1.97246e-15	6.14294e-14
Hcfc1r1	-0.378851	9.49897	65.111	2.0657e-15	6.42617e-14
Anapc13	0.257658	10.0159	63.0365	2.18255e-15	6.78213e-14
Tcf25	-0.407177	9.44088	73.3894	2.21282e-15	6.86859e-14
AB124611	-0.399903	9.2157	295.773	2.22755e-15	6.90664e-14
Gabarap	-0.260384	10.2053	62.8802	2.36197e-15	7.31532e-14
Bckdha	-0.383477	9.47807	67.0674	2.39742e-15	7.4169e-14
Fam195a	0.230762	9.63906	62.8431	2.40678e-15	7.43764e-14
Tagln	0.302822	9.20434	329.08	2.48577e-15	7.67328e-14
Pex11a	-0.4559	9.30197	107.448	2.52941e-15	7.79939e-14
Emb	-0.406634	9.24574	145.412	2.54297e-15	7.83258e-14
Rpl13	-0.226277	11.2242	62.7297	2.54869e-15	7.84157e-14
Ndufc1	0.228627	10.4133	62.6109	2.70647e-15	8.31787e-14
Ddx39b	-0.430961	9.34738	89.8746	3.17365e-15	9.74296e-14
Cmc1	-0.421324	9.31333	99.1032	3.66919e-15	1.12519e-13
Akr1b3	0.348662	9.29741	82.5339	3.7063e-15	1.13533e-13
Epsti1	-0.383767	9.22447	200.951	3.74765e-15	1.14614e-13
Crb3	-0.417699	9.3132	97.7551	3.74978e-15	1.14614e-13
Ccdc107	0.275827	9.77503	61.9539	3.77264e-15	1.15187e-13
Slc48a1	-0.426768	9.38966	80.2133	3.96472e-15	1.20919e-13
Pmp22	0.268813	9.19798	483.931	3.97e-15	1.20949e-13
Ncf4	-0.396511	9.21806	255.627	4.26221e-15	1.2971e-13
Abhd3	0.351117	9.29133	105.108	4.39334e-15	1.33556e-13
Tgfbi	-0.464444	9.21958	269.775	4.4447e-15	1.34971e-13
2310061I04Rik	-0.461682	9.31489	103.908	4.76409e-15	1.44513e-13
Tmco3	0.337044	9.24147	158.168	5.0591e-15	1.53295e-13
Nr1d1	0.304951	9.23224	187.311	5.85446e-15	1.77203e-13
Camk2d	-0.39666	9.34548	79.3966	5.96421e-15	1.8033e-13
Cfp	-0.420096	9.21994	234.559	5.99344e-15	1.81019e-13
Csnk2b	-0.405138	9.40703	75.2769	6.52834e-15	1.96962e-13
Tor3a	-0.509292	9.25154	205.102	6.57131e-15	1.98045e-13
Nhs	0.30183	9.25961	135.367	6.58965e-15	1.98384e-13
Nav2	-0.49108	9.27603	126.337	7.13606e-15	2.14603e-13
Tmem219	-0.450944	9.30169	106.551	7.35411e-15	2.20923e-13
Ankrd13c	0.225119	9.58427	60.5634	7.62141e-15	2.28708e-13
Gchfr	0.274044	9.38684	69.5208	7.7556e-15	2.32485e-13
Arf3	-0.385012	9.36917	76.9702	7.92586e-15	2.37335e-13
Nus1	0.260039	9.75699	60.457	8.04265e-15	2.40575e-13
Mad2l2	-0.396167	9.24447	156.545	8.17698e-15	2.44332e-13
Wnk4	-0.467105	9.38325	69.3482	9.37775e-15	2.79913e-13
Fahd1	0.256247	9.51674	60.0793	9.73616e-15	2.90301e-13
Adrb2	0.28692	9.23407	164.707	1.02421e-14	3.05061e-13
Ccnl1	0.334348	9.34886	81.1953	1.029e-14	3.06163e-13
Itgb2	-0.499297	9.23759	173.155	1.04182e-14	3.09649e-13
Cyhr1	-0.468781	9.35426	88.693	1.06461e-14	3.16086e-13
Spry4	0.223327	9.19046	907.631	1.11585e-14	3.3095e-13
H2afy	-0.394985	9.36709	77.4163	1.13369e-14	3.35884e-13
Abracl	-0.339936	9.48956	59.6219	1.22711e-14	3.63179e-13
Arl5b	0.350865	9.22149	218.446	1.3071e-14	3.86443e-13
Map3k7cl	0.249775	9.23182	182.375	1.31197e-14	3.87475e-13
Sap30	0.297135	9.39416	66.8471	1.39183e-14	4.10626e-13
Piga	0.324781	9.24889	147.074	1.50077e-14	4.423e-13
Uba1	-0.406671	9.33668	85.992	1.71144e-14	5.03859e-13
Magt1	0.294298	9.40464	67.9662	1.91346e-14	5.62741e-13
C1qb	-0.481171	9.23851	133.755	1.91554e-14	5.62764e-13
Tpi1	-0.303303	9.97363	58.4991	2.16602e-14	6.35685e-13
Akr1d1	0.258343	9.21388	256.037	2.22952e-14	6.53636e-13
Cdkn2d	-0.373669	9.22874	185.506	2.25204e-14	6.59547e-13
Gm4208	0.152138	9.24755	121.754	2.26351e-14	6.62211e-13
Cpne4	0.28394	9.21701	235.341	2.31988e-14	6.77996e-13
Tmem27	0.294815	10.6576	58.2921	2.40531e-14	7.0223e-13
0610009B22Rik	0.322538	9.36998	67.236	2.53813e-14	7.40234e-13
Nr4a1	0.256151	9.22932	184.012	2.57004e-14	7.48761e-13
Tgif2	0.151534	9.18508	2363.31	2.73997e-14	7.9744e-13
Miox	0.274627	10.7659	57.98	2.81694e-14	8.18988e-13
Cd68	-0.338409	9.2093	310.848	2.937e-14	8.53008e-13
Clcnka	-0.43223	9.24128	152.94	3.12534e-14	9.06771e-13
Coq10b	0.353036	9.29545	99.6752	3.19687e-14	9.26563e-13
Tkt	-0.412292	9.44041	64.3573	3.31455e-14	9.59678e-13
Larp4b	0.305301	9.41518	61.0848	3.32903e-14	9.62874e-13
Ssr4	-0.322735	9.6256	57.6478	3.33283e-14	9.62979e-13
Trabd2b	0.18266	9.34369	85.6531	3.35761e-14	9.69138e-13
Tead1	0.333359	9.30325	90.5996	3.69165e-14	1.06446e-12
Banf1	-0.37934	9.37491	73.1962	3.72977e-14	1.07434e-12
Stat2	-0.430465	9.22774	227.156	3.88789e-14	1.11874e-12
Xbp1	-0.350393	9.45987	57.2494	4.07792e-14	1.17221e-12
Cntnap5a	0.120308	9.18489	2151.71	4.18429e-14	1.20156e-12
Iqgap1	-0.402135	9.33042	75.8325	4.20528e-14	1.20635e-12
Gm9843	-0.326549	9.54105	57.1647	4.25668e-14	1.21984e-12
Oas1a	-0.356728	9.20999	329.87	4.57817e-14	1.31063e-12
Vrk3	-0.40195	9.28007	109.49	4.75908e-14	1.36103e-12
Ahsa2	0.322703	9.2309	174.022	4.83555e-14	1.38149e-12
Chmp2a	-0.323965	9.53562	56.8605	4.96552e-14	1.41717e-12
Psmb7	-0.360652	9.44546	64.0061	5.00297e-14	1.42641e-12
Qsox1	-0.420197	9.22583	212.994	5.1033e-14	1.45281e-12
Gadd45g	0.329799	9.68909	56.8054	5.10596e-14	1.45281e-12
Them6	-0.441947	9.23076	194.459	5.22438e-14	1.485e-12
Emc6	-0.308658	9.68978	56.7372	5.28557e-14	1.50087e-12
Syngr2	-0.407276	9.32967	83.9074	5.51918e-14	1.56561e-12
1700016C15Rik	0.314687	9.47123	56.629	5.58327e-14	1.58219e-12
S100g	-0.52508	11.7962	56.5796	5.72477e-14	1.62065e-12
Rrbp1	-0.354889	9.46329	57.186	5.73498e-14	1.6219e-12
D630029K05Rik	0.0392349	9.39078	73.6287	5.8541e-14	1.65391e-12
Cnn3	-0.347041	9.56194	56.513	5.92108e-14	1.67115e-12
Cd74	-0.466297	10.0102	56.5109	5.92748e-14	1.67127e-12
Cmtm6	0.321326	9.36318	68.3072	6.0661e-14	1.70864e-12
Thbd	0.301083	9.20356	329.373	6.13105e-14	1.7252e-12
Nupr1	-0.521605	9.29173	82.5731	6.72066e-14	1.88921e-12
Acss2	0.17878	9.35053	81.6753	7.08156e-14	1.98866e-12
Il13	0.0884858	9.18329	2517.84	8.26004e-14	2.31728e-12
Casp8	-0.397385	9.26723	116.507	8.80038e-14	2.4664e-12
Ube2l3	-0.345939	9.41547	62.0694	8.86391e-14	2.48172e-12
Mitd1	-0.435383	9.25505	142.94	9.09408e-14	2.54362e-12
Slc16a4	0.219836	9.29814	95.7554	9.38944e-14	2.62197e-12
Zfp706	0.251316	10.002	55.6022	9.39293e-14	2.62197e-12
Arf5	-0.309461	9.64858	55.5717	9.53922e-14	2.66015e-12
Ccl4	0.248238	9.412	55.5482	9.65339e-14	2.68931e-12
Zdhhc4	-0.405744	9.25343	134.631	1.05761e-13	2.94343e-12
Trf	-0.325313	9.20993	281.658	1.05983e-13	2.94667e-12
Ltbp1	0.190888	9.18962	834.947	1.0786e-13	2.99589e-12
Acox3	0.229326	9.4131	62.9161	1.10105e-13	3.05522e-12
Anp32b	-0.387422	9.34559	72.0089	1.14462e-13	3.17297e-12
Lrp10	-0.407679	9.33596	81.8782	1.15678e-13	3.20171e-12
Siglece	-0.318617	9.20384	386.537	1.15727e-13	3.20171e-12
S100a1	-0.281382	10.2468	55.1363	1.18939e-13	3.28732e-12
Rps19	-0.199188	11.4279	54.8617	1.36698e-13	3.77443e-12
Id2	-0.297764	10.3777	54.8402	1.38195e-13	3.81201e-12
Mfap3l	0.263949	9.30393	91.9032	1.39395e-13	3.84132e-12
Urm1	-0.422652	9.25168	138.069	1.40069e-13	3.8561e-12
Csgalnact1	0.261174	9.20169	354.633	1.49952e-13	4.12412e-12
Slc26a1	0.133361	9.32585	90.9631	1.50589e-13	4.13422e-12
Plin3	-0.40202	9.27573	108.799	1.50615e-13	4.13422e-12
Ms4a6d	-0.333824	9.20569	312.766	1.60859e-13	4.41111e-12
Kdr	0.302786	9.21374	221.224	1.6359e-13	4.4816e-12
Aida	-0.381648	9.24055	147.85	1.64692e-13	4.50738e-12
Nap1l4	-0.427361	9.27816	110.124	1.66161e-13	4.54314e-12
Slc22a2	0.222123	9.3225	80.8606	1.72226e-13	4.70438e-12
Pank1	0.287092	9.57028	54.3635	1.75964e-13	4.80179e-12
Spag9	0.266561	9.42671	61.332	1.76745e-13	4.81841e-12
Nes	0.152074	9.1859	1640.34	1.78271e-13	4.85528e-12
1110038F14Rik	-0.385508	9.27049	109.915	1.79707e-13	4.88963e-12
Mpeg1	-0.359933	9.21504	230.841	1.80401e-13	4.90376e-12
Phb2	-0.350283	9.555	54.6396	1.8602e-13	5.05158e-12
Psmc5	-0.36094	9.36972	68.2644	1.88876e-13	5.12418e-12
Pla1a	-0.271916	9.20328	352.758	2.07783e-13	5.63165e-12
Fabp5	-0.42195	9.23131	153.295	2.14513e-13	5.80844e-12
Tmcc3	-0.389054	9.25528	123.446	2.41892e-13	6.54346e-12
Psmc1	-0.372927	9.34361	75.0177	2.47842e-13	6.69796e-12
C1ra	-0.286524	9.20035	449.639	2.53446e-13	6.84281e-12
Acnat1	0.267032	9.23802	150.735	2.53742e-13	6.84418e-12
Ampd3	-0.369513	9.23103	167.392	2.61406e-13	7.04412e-12
Arhgap24	0.208875	9.36736	73.4268	2.73216e-13	7.35528e-12
Tax1bp3	-0.375137	9.31446	80.869	2.8432e-13	7.64686e-12
Hsd17b11	0.281334	9.3479	68.2932	2.85935e-13	7.68293e-12
Bphl	0.257455	9.61306	53.3786	2.89931e-13	7.78284e-12
Plpp2	-0.404855	9.26483	116.471	2.92353e-13	7.84032e-12
Ifi30	-0.454236	9.27071	104.107	3.01719e-13	8.08375e-12
D17Wsu92e	-0.375136	9.36658	69.585	3.02698e-13	8.10224e-12
Hsdl2	-0.391185	9.31897	83.626	3.05536e-13	8.17039e-12
Snhg9	-0.416773	9.38174	71.4684	3.34963e-13	8.94875e-12
H2-DMb2	-0.353317	9.21719	213.989	3.38635e-13	9.03824e-12
Ccdc6	0.266802	9.34391	73.4433	3.90646e-13	1.04165e-11
Slc31a1	0.290571	9.42648	56.0563	4.07148e-13	1.08462e-11
Ndufa1	0.207843	10.4416	52.6738	4.14514e-13	1.10319e-11
Reep6	-0.719378	9.31956	101.754	4.25429e-13	1.13117e-11
Ppic	0.320398	9.24847	115.352	4.44563e-13	1.18092e-11
Ndufc2	0.229259	10.0564	52.5233	4.47405e-13	1.18734e-11
Shmt1	-0.445825	9.27117	112.499	4.58146e-13	1.21469e-11
Arhgap15	-0.364248	9.23365	151.805	4.76083e-13	1.26106e-11
Bag1	-0.305295	9.75873	52.3857	4.79754e-13	1.26862e-11
Ccdc12	-0.328556	9.46722	53.1037	4.79843e-13	1.26862e-11
C4b	-0.364807	9.21164	275.618	4.97859e-13	1.315e-11
Actg1	-0.29048	10.381	52.2392	5.16755e-13	1.36363e-11
Ubxn6	-0.398751	9.32616	80.7693	5.61415e-13	1.48008e-11
Top1	0.281368	9.41824	58.3317	6.0708e-13	1.59897e-11
Serpinf2	0.26521	9.3501	67.9015	6.10495e-13	1.60645e-11
Nrip1	0.317573	9.32539	74.6935	6.1802e-13	1.62473e-11
BC004004	-0.350159	9.49665	55.8455	6.20553e-13	1.62985e-11
Hras	-0.396378	9.34729	74.2123	6.36212e-13	1.66941e-11
Tef	0.15346	9.39122	68.3457	6.58042e-13	1.72508e-11
Hcls1	-0.375595	9.22052	192.409	6.70981e-13	1.75736e-11
Ppp1r15a	0.35029	9.24142	130.757	7.05083e-13	1.84494e-11
Rps6	-0.236675	10.6312	51.6112	7.10695e-13	1.85789e-11
Pink1	-0.382519	9.43339	60.337	7.31575e-13	1.91069e-11
Ptprb	0.219311	9.20692	268.182	7.35634e-13	1.9195e-11
Ptbp3	-0.342055	9.38111	57.3514	7.41254e-13	1.93237e-11
Ltbr	-0.396687	9.2689	109.743	7.48731e-13	1.95004e-11
Gdf15	0.28828	9.27515	94.4705	7.75066e-13	2.01676e-11
Gm16685	-0.356292	9.22223	193.157	7.90854e-13	2.05593e-11
Apobec3	-0.361462	9.23035	149.136	8.16962e-13	2.12183e-11
Cox20	0.256064	9.62244	51.2449	8.55878e-13	2.22084e-11
Commd6	0.276548	9.44637	51.5793	8.65922e-13	2.24482e-11
Mri1	-0.36305	9.23332	154.436	8.91465e-13	2.3089e-11
Tmem252	0.285405	9.86011	51.1246	9.09764e-13	2.35412e-11
Alyref	-0.394308	9.28944	91.9935	9.1104e-13	2.35524e-11
Tmem171	-0.311351	9.21519	213.753	9.32452e-13	2.40837e-11
RP24-294M17.1	-0.408049	9.25706	115.564	9.42083e-13	2.43101e-11
Reg3g	0.0794535	9.19478	513.379	9.43645e-13	2.4328e-11
Ugt3a2	0.300813	9.96104	51.036	9.51624e-13	2.45111e-11
Bloc1s1	0.282126	9.46953	51.008	9.65264e-13	2.48396e-11
Arap1	-0.310532	9.21177	245.238	1.0103e-12	2.59746e-11
Tlr3	-0.404988	9.22896	191.073	1.04358e-12	2.68057e-11
Cdk16	-0.408382	9.29805	92.0336	1.05281e-12	2.70179e-11
St14	-0.374701	9.24912	119.084	1.07236e-12	2.74945e-11
Arhgef1	-0.458509	9.26878	110.636	1.07511e-12	2.75397e-11
Npl	-0.442516	9.29076	91.2333	1.08936e-12	2.78792e-11
Slc40a1	-0.37439	9.29402	87.3818	1.14768e-12	2.93449e-11
Unc5c	0.23439	9.20202	335.573	1.17146e-12	2.99257e-11
Agtrap	-0.383468	9.30489	85.6363	1.19037e-12	3.03811e-11
Wfdc21	-1.78163	9.47321	50.4426	1.28614e-12	3.27921e-11
Btnl9	0.1464	9.1874	1129.74	1.28718e-12	3.27921e-11
Cct2	-0.380233	9.33835	72.6778	1.30406e-12	3.31919e-11
Aldob	-0.29865	11.4863	50.3877	1.32253e-12	3.36314e-11
Prkag2	-0.398822	9.24656	131.989	1.38125e-12	3.50928e-11
Pex16	-0.392298	9.28269	97.1484	1.40713e-12	3.57179e-11
Tsc22d4	-0.420871	9.30778	84.4724	1.45188e-12	3.68205e-11
Fxyd3	0.200429	9.20147	301.076	1.5386e-12	3.89844e-11
Pbxip1	-0.41036	9.31502	77.3794	1.56505e-12	3.96188e-11
Tie1	0.195211	9.19879	336.831	1.5936e-12	4.0305e-11
Mbd2	-0.372006	9.30764	80.5168	1.6621e-12	4.19994e-11
Zfp467	-0.428909	9.29817	88.7531	1.68762e-12	4.26059e-11
Ak1	-0.361758	9.22267	183.502	1.79555e-12	4.529e-11
Smcp	0.143603	9.18878	802.198	1.8162e-12	4.57694e-11
Mep1b	0.204116	9.20771	255.645	1.81801e-12	4.57738e-11
Reps2	0.258178	9.24826	123.62	1.89081e-12	4.75642e-11
Ckmt1	-0.392638	9.261	98.8205	1.9019e-12	4.78003e-11
Rpain	-0.371291	9.28965	88.5358	1.91484e-12	4.80823e-11
Ctps	-0.349928	9.22888	159.406	1.96113e-12	4.92005e-11
Rras	-0.340711	9.22263	176.197	1.97994e-12	4.9628e-11
Eif3h	-0.329133	9.57982	49.5795	1.99362e-12	4.98864e-11
Bnc2	0.238688	9.25902	113.309	1.99382e-12	4.98864e-11
Fcgr4	-0.396952	9.21682	224.021	2.00145e-12	5.00327e-11
Sdc4	-0.301866	9.97079	49.4786	2.0985e-12	5.24119e-11
Psmb6	-0.284695	9.66396	49.3905	2.19456e-12	5.47622e-11
Furin	-0.349594	9.39339	58.2915	2.21576e-12	5.52421e-11
Gpr146	-0.384667	9.25209	120.434	2.28297e-12	5.6867e-11
Phyh	-0.301068	9.64285	49.289	2.31057e-12	5.75035e-11
Ndufv1	-0.316884	9.54035	49.0127	2.65879e-12	6.61108e-11
Ppargc1a	0.224541	9.41882	53.649	2.7282e-12	6.77765e-11
Tbc1d10a	0.304086	9.26136	105.838	2.77629e-12	6.891e-11
Upk2	0.142758	9.18689	1246.71	2.83074e-12	7.01994e-11
Hacl1	-0.531925	9.26367	122.734	2.835e-12	7.02427e-11
Sin3b	-0.374326	9.33295	72.2933	3.12474e-12	7.73531e-11
Ifi47	-0.675653	9.32246	102.746	3.1509e-12	7.79319e-11
Plekho1	-0.223505	9.19717	432.761	3.18456e-12	7.86948e-11
Dctn2	-0.373734	9.34196	71.5292	3.48129e-12	8.59515e-11
Cenpb	-0.41272	9.36763	67.2936	3.49764e-12	8.62793e-11
Mgat4b	-0.414945	9.2898	91.8859	3.62224e-12	8.92742e-11
Npr3	0.127946	9.18764	819.414	3.65333e-12	8.99613e-11
Ssna1	-0.374438	9.33997	71.8225	3.77477e-12	9.28699e-11
Mfge8	-0.3744	9.24705	118.186	3.79796e-12	9.33583e-11
Ptprf	-0.384393	9.36903	62.7469	3.83114e-12	9.40915e-11
Surf4	-0.362096	9.36301	63.8153	3.83754e-12	9.41661e-11
Rtcb	-0.369774	9.31389	77.5076	3.9096e-12	9.58503e-11
Ap5s1	-0.351233	9.22998	154.826	3.99855e-12	9.79452e-11
R3hdm4	-0.410179	9.32126	77.6692	4.01667e-12	9.83031e-11
Rgs19	-0.272771	9.20354	318.389	4.03073e-12	9.85611e-11
Tc2n	0.217909	9.19447	466.741	4.03491e-12	9.85772e-11
C1qtnf4	-0.39409	9.24592	122.301	4.1087e-12	1.00292e-10
Ntrk3	0.100023	9.18405	2515.4	4.41923e-12	1.07778e-10
Errfi1	0.268324	10.2302	47.9907	4.46931e-12	1.08905e-10
S100a8	-2.37708	10.9912	47.9502	4.56221e-12	1.11072e-10
Vdac2	-0.296578	9.63231	47.93	4.60929e-12	1.12121e-10
Blvrb	-0.395791	9.28897	84.6143	4.73669e-12	1.1512e-10
Eif1ad	-0.375195	9.28319	91.0502	4.74643e-12	1.15256e-10
Ifna5	0.0731229	9.18309	1428.17	4.86139e-12	1.17946e-10
Clec4a2	-0.379645	9.20999	244.647	4.87119e-12	1.18081e-10
Gngt2	-0.58916	9.34921	53.6203	5.17684e-12	1.25382e-10
Slc25a5	-0.208874	10.7037	47.6848	5.22127e-12	1.26348e-10
Stx18	-0.347388	9.24128	126.351	5.33569e-12	1.29006e-10
Galt	-0.405531	9.27766	96.8352	5.34371e-12	1.29088e-10
Cckar	0.0971555	9.25909	96.7752	5.40066e-12	1.30352e-10
Gm29012	0.144093	9.18762	905.955	5.543e-12	1.33672e-10
Pdcd5	-0.293891	9.52002	47.5212	5.67405e-12	1.36714e-10
Akr1a1	0.212795	10.916	47.5003	5.73455e-12	1.38053e-10
Dkk2	0.164623	9.18999	645.049	5.75662e-12	1.38465e-10
Pla2g12a	-0.364674	9.2978	80.3707	5.85724e-12	1.40765e-10
Col19a1	0.10115	9.18421	2294.47	5.94784e-12	1.4282e-10
Sumo1	0.261267	9.64822	47.3914	6.06096e-12	1.45411e-10
Sri	-0.300813	9.52498	47.3434	6.21062e-12	1.48874e-10
Vars	-0.323521	9.22603	158.117	6.46899e-12	1.54935e-10
Trim12c	-0.385468	9.23358	155.167	6.54861e-12	1.56708e-10
Hspb6	-0.31635	9.21361	218.857	6.63194e-12	1.58566e-10
Zfp871	0.2794	9.26881	97.7714	6.69746e-12	1.59996e-10
Nqo1	-0.401386	9.28412	89.425	6.71832e-12	1.60358e-10
Ddah1	0.214004	9.58081	47.0919	7.05817e-12	1.68326e-10
Il6	0.0353532	9.19074	888.066	7.22771e-12	1.72222e-10
Slc16a1	-0.38076	9.305	74.2867	7.3619e-12	1.75271e-10
Cdc42	-0.295584	9.66185	47.0072	7.36851e-12	1.75279e-10
Cox6a1	-0.172168	11.154	46.9856	7.44992e-12	1.77065e-10
Ccl9	-0.402849	9.22205	152.9	7.55047e-12	1.79303e-10
Snhg18	0.250902	9.70138	46.9487	7.59118e-12	1.80117e-10
Areg	0.114515	9.18471	2134.83	7.69845e-12	1.82507e-10
AU021092	0.222079	9.19947	349.46	8.50977e-12	2.01571e-10
Ptpru	0.140189	9.19015	678.615	8.5846e-12	2.03171e-10
Tmem160	-0.318075	9.44697	50.1875	8.81169e-12	2.0837e-10
Gm26909	0.205327	9.20785	247.794	8.97095e-12	2.11819e-10
Prr15l	-0.355685	9.40296	56.3474	8.97268e-12	2.11819e-10
Ugt3a1	0.240094	9.53616	46.5836	9.14009e-12	2.15589e-10
Gm15441	-0.481171	9.25728	117.106	9.33341e-12	2.19964e-10
Isg20	-0.540252	9.2466	159.609	9.41954e-12	2.21807e-10
Cenpv	-0.390949	9.22967	157.024	9.62148e-12	2.26372e-10
Slc25a28	-0.35925	9.26018	103.117	9.68067e-12	2.27494e-10
Zmynd10	0.0294839	9.35781	71.0772	9.68545e-12	2.27494e-10
Sele	0.0859391	9.1834	2702.71	9.82195e-12	2.30507e-10
Ttr	0.322489	9.69724	46.4268	9.89895e-12	2.3212e-10
Eif3l	-0.397932	9.3208	75.3737	9.94309e-12	2.3296e-10
Ednrb	0.241107	9.19782	367.432	9.97949e-12	2.33617e-10
Rhod	-0.313669	9.22079	172.173	1.03246e-11	2.41493e-10
Prkar1a	-0.30429	9.47371	46.3406	1.03426e-11	2.41713e-10
Sema4a	-0.400935	9.29587	83.4364	1.06056e-11	2.47653e-10
Tnfsf10	-0.457946	9.31506	80.6854	1.06414e-11	2.48281e-10
Cdk4	-0.390042	9.32795	71.7723	1.0766e-11	2.50979e-10
Aebp1	-0.367493	9.23103	141.398	1.11894e-11	2.60633e-10
Arpc1a	-0.345775	9.39472	54.905	1.12306e-11	2.61376e-10
Gpsm3	-0.412083	9.22665	156.407	1.12436e-11	2.61459e-10
Cdc34	-0.398861	9.31332	76.1639	1.13154e-11	2.62913e-10
Pkn1	-0.366948	9.23406	141.731	1.18702e-11	2.75573e-10
Mpdu1	-0.394374	9.29079	86.351	1.221e-11	2.83227e-10
Tmem30a	0.261084	9.48488	46.0064	1.22593e-11	2.84136e-10
Bscl2	-0.444239	9.3082	81.8133	1.23524e-11	2.86058e-10
Ddr1	-0.353391	9.31222	70.5742	1.25202e-11	2.89703e-10
Psmb2	-0.2967	9.51373	45.9071	1.28946e-11	2.98119e-10
Ppm1h	0.265946	9.35609	61.3153	1.29308e-11	2.9871e-10
Plxnb2	-0.36575	9.36658	59.4463	1.30349e-11	3.00867e-10
Glipr2	-0.282411	9.20647	254.834	1.31224e-11	3.02637e-10
Diaph1	-0.357999	9.25456	105.697	1.33052e-11	3.06599e-10
Atf4	-0.337924	9.35405	60.9248	1.38181e-11	3.18158e-10
Dlst	-0.368637	9.42373	54.3319	1.40739e-11	3.23781e-10
Ppp1r9b	-0.299483	9.21769	181.228	1.50196e-11	3.45254e-10
Piezo1	-0.356743	9.26043	99.7803	1.52386e-11	3.5e-10
Ndufs2	-0.286404	9.67923	45.51	1.5782e-11	3.62185e-10
Sh3tc2	-0.353441	9.2253	164.023	1.58962e-11	3.64505e-10
Pdp2	0.179979	9.24337	125.544	1.6163e-11	3.7032e-10
Hnrnpa1	-0.341125	9.37277	55.7027	1.82473e-11	4.17734e-10
Tpd52	-0.294691	9.542	45.217	1.83203e-11	4.19061e-10
Kcnk1	-0.374011	9.26975	87.1249	1.87179e-11	4.27806e-10
Yipf3	-0.377329	9.28519	85.7269	1.94261e-11	4.43631e-10
Prr5	0.291894	9.29454	77.0754	1.94758e-11	4.44404e-10
Bcam	-0.389218	9.27306	83.1559	2.02625e-11	4.61979e-10
Cgnl1	-0.345344	9.39117	52.1298	2.04134e-11	4.65039e-10
Med28	0.252486	9.72034	44.9273	2.12308e-11	4.83269e-10
Plekhf1	0.242431	9.22303	160.574	2.15612e-11	4.9039e-10
Tgfbr1	-0.3582	9.29201	78.3374	2.17572e-11	4.94179e-10
Gpm6a	0.253485	9.27908	80.7577	2.17631e-11	4.94179e-10
Glis1	0.209482	9.23056	144.446	2.30788e-11	5.23632e-10
Chst7	0.166031	9.20823	202.021	2.3473e-11	5.32143e-10
Sugct	0.256728	9.20258	267.133	2.39265e-11	5.41985e-10
Adgrf5	0.316336	9.25001	87.2074	2.58735e-11	5.85616e-10
Slc6a8	-0.376883	9.39566	54.2547	2.60875e-11	5.89982e-10
Ptn	0.134256	9.18651	1080.54	2.61473e-11	5.90856e-10
Cd48	-0.326581	9.21472	195.278	2.67561e-11	6.04128e-10
Gm13889	0.175518	9.19194	599.137	2.71977e-11	6.13602e-10
Maf1	-0.356848	9.35837	61.9039	2.79914e-11	6.31002e-10
Bod1	-0.439335	9.34162	67.9956	2.93699e-11	6.61544e-10
Pcbp2	-0.244211	9.94524	44.2746	2.95996e-11	6.66182e-10
Ms4a4b	-0.39007	9.25754	75.4643	3.01354e-11	6.77696e-10
F630028O10Rik	-0.306405	9.20457	298.022	3.03731e-11	6.82493e-10
Aph1a	-0.39665	9.31091	75.0621	3.16352e-11	7.10283e-10
Cd164	-0.299065	9.60903	44.1122	3.21522e-11	7.21312e-10
Zfp810	-0.335308	9.23596	125.526	3.28002e-11	7.3526e-10
Afap1l1	0.105108	9.25726	104.726	3.36689e-11	7.54129e-10
Acsl5	-0.365321	9.27893	83.2778	3.38764e-11	7.58171e-10
Rnf183	-0.354255	9.28672	76.569	3.41626e-11	7.63964e-10
Ap3s1	0.27898	9.38391	50.7424	3.42224e-11	7.64691e-10
Acp5	-0.433744	9.28071	80.624	3.52347e-11	7.86683e-10
Snx21	-0.379409	9.23002	147.9	3.53517e-11	7.88666e-10
P2rx4	-0.373486	9.27201	89.8327	3.60117e-11	8.02751e-10
Slc31a2	-0.289047	9.21586	181.256	3.68026e-11	8.19729e-10
Nacc2	-0.412814	9.256	107.351	3.74641e-11	8.33799e-10
Mllt6	-0.354357	9.2529	104.002	3.78662e-11	8.42079e-10
Lamtor2	0.236539	9.75707	43.7432	3.87994e-11	8.62148e-10
Cep85	-0.3819	9.28142	83.5845	3.91697e-11	8.69685e-10
Map2k1	-0.353108	9.26338	94.0197	3.93265e-11	8.72475e-10
Eif2ak2	-0.402857	9.23784	143.177	3.99965e-11	8.86637e-10
Mpp1	-0.311584	9.38269	49.5963	4.01589e-11	8.89532e-10
Sparc	0.274949	9.26463	69.5487	4.11627e-11	9.11045e-10
Rnaseh2a	-0.305193	9.21292	202.589	4.15186e-11	9.18198e-10
Rpl9	-0.203697	10.6508	43.6067	4.15925e-11	9.19105e-10
Ehhadh	-0.333251	9.73399	43.5817	4.21261e-11	9.30162e-10
Dst	-0.371088	9.37432	53.3942	4.27414e-11	9.43004e-10
Nubp2	-0.355719	9.25322	104.654	4.36497e-11	9.62287e-10
Txnrd1	-0.324122	9.34595	58.4395	4.38878e-11	9.66774e-10
Creb3	-0.335782	9.2529	101.113	4.63327e-11	1.01983e-09
G6pdx	-0.318835	9.22033	163.559	4.64901e-11	1.02231e-09
Osbpl9	0.236831	9.49415	43.596	4.65184e-11	1.02231e-09
Cd9	-0.342947	9.46054	43.38	4.66842e-11	1.02515e-09
Tubb5	-0.366107	9.35784	47.6115	4.93533e-11	1.08291e-09
Slc9a3r2	0.204577	9.23698	108.363	5.02204e-11	1.10107e-09
AI837181	-0.316873	9.22875	138.613	5.09366e-11	1.11579e-09
Cyp2d12	0.242755	9.29202	59.6603	5.09713e-11	1.11579e-09
Tceal8	0.281722	9.37906	50.9001	5.14054e-11	1.12441e-09
Pigt	-0.383471	9.29267	78.384	5.17554e-11	1.13118e-09
Napa	-0.340745	9.34827	59.6942	5.25002e-11	1.14657e-09
3110099E03Rik	0.142321	9.18746	1024.75	5.35866e-11	1.16938e-09
Mapk13	-0.320343	9.21876	172.665	5.36363e-11	1.16956e-09
Phkg2	-0.38637	9.25491	105.472	5.5309e-11	1.20509e-09
Rorc	-0.479215	9.27798	91.9128	5.607e-11	1.22072e-09
Nosip	-0.343049	9.23523	126.827	5.63268e-11	1.22536e-09
Plpp1	0.268474	9.27923	60.9064	5.67546e-11	1.23371e-09
Plat	0.209851	9.21805	162.418	5.6828e-11	1.23435e-09
Slc25a20	-0.411541	9.30724	75.2684	5.6902e-11	1.23499e-09
Plec	-0.33174	9.23687	118.538	5.6978e-11	1.23569e-09
Ube2i	-0.31419	9.38264	51.2127	5.84743e-11	1.26715e-09
Vwa1	0.216327	9.21439	186.871	6.16269e-11	1.33444e-09
Ilvbl	-0.359249	9.23556	129.482	6.22519e-11	1.34693e-09
Pklr	-0.353462	9.22955	142.255	6.49232e-11	1.40365e-09
Sdf4	-0.331	9.38739	52.7015	6.50392e-11	1.40507e-09
Eif3d	-0.347662	9.27387	85.0378	6.63327e-11	1.43191e-09
Scarb2	-0.338397	9.24208	111.514	6.70005e-11	1.44521e-09
Stub1	-0.331013	9.46243	49.5058	6.86917e-11	1.48055e-09
Apoc3	-0.674629	9.29838	71.9127	6.9549e-11	1.49787e-09
Serinc3	-0.314218	9.83449	42.5654	7.07048e-11	1.52159e-09
Pitpna	-0.369561	9.32905	61.9442	7.16617e-11	1.541e-09
Serhl	-0.39144	9.27253	90.2323	7.37459e-11	1.5845e-09
Tcn2	-0.273577	10.1791	42.4814	7.37977e-11	1.5845e-09
Cacybp	0.29276	9.31358	62.0639	7.39551e-11	1.58666e-09
mt-Nd2	0.195663	12.662	42.4655	7.43978e-11	1.59494e-09
Creb5	0.136884	9.18773	976.773	7.76343e-11	1.66305e-09
Max	-0.342326	9.28135	79.0176	7.90592e-11	1.69228e-09
Dnajc7	-0.352679	9.31508	66.5923	7.95448e-11	1.70137e-09
Nsmce4a	-0.343477	9.29965	72.7917	8.70893e-11	1.86132e-09
Bin2	-0.362675	9.21553	199.026	8.90246e-11	1.90123e-09
Auts2	0.266176	9.26448	90.1967	9.06254e-11	1.93394e-09
Cox16	0.303608	9.2739	80.8948	9.39097e-11	2.0025e-09
Pik3ip1	-0.251732	9.20502	250.086	9.4999e-11	2.02323e-09
Etfdh	-0.370777	9.33631	63.1843	9.50263e-11	2.02323e-09
Lamp1	-0.237938	10.0987	41.9011	9.92055e-11	2.1106e-09
Psmd4	-0.306693	9.40665	48.8651	1.00061e-10	2.12719e-09
Rhog	-0.377548	9.2429	108.994	1.0195e-10	2.1657e-09
B4galt5	0.261208	9.30298	68.5638	1.04484e-10	2.21784e-09
Cml5	-0.452902	9.29487	75.9763	1.06411e-10	2.25704e-09
Hivep2	0.242493	9.22595	146.335	1.06987e-10	2.26754e-09
Isoc2a	-0.652678	9.32758	73.556	1.07293e-10	2.27231e-09
Sap30l	-0.383457	9.24977	105.816	1.0813e-10	2.2883e-09
Tmem37	-0.326919	9.46311	41.7109	1.09306e-10	2.31144e-09
Chkb	-0.390847	9.28311	83.1059	1.13091e-10	2.38967e-09
Ilk	-0.336339	9.30977	66.3106	1.16528e-10	2.46044e-09
Chchd2	-0.163759	11.2558	41.5757	1.17112e-10	2.47091e-09
Bax	-0.291827	9.45536	41.48	1.22969e-10	2.59254e-09
Pou2f2	-0.44046	9.23683	118.923	1.24749e-10	2.62809e-09
Bre	-0.357061	9.27431	83.4128	1.24951e-10	2.63036e-09
1110019D14Rik	0.256722	9.23827	112.865	1.25277e-10	2.63524e-09
Cd151	-0.351292	9.30184	68.09	1.2626e-10	2.65393e-09
Ywhah	-0.297223	9.40832	43.1346	1.27367e-10	2.67518e-09
Adar	-0.330458	9.22342	156.886	1.28134e-10	2.68927e-09
Mef2c	0.205441	9.20689	225.362	1.29006e-10	2.70555e-09
Mrpl35	-0.308514	9.38558	48.77	1.29379e-10	2.71135e-09
Bspry	-0.34318	9.25668	94.0482	1.29737e-10	2.71681e-09
Krt5	0.0931462	9.18688	985.726	1.305e-10	2.73074e-09
Smtnl2	-0.334895	9.23537	120.545	1.31234e-10	2.74405e-09
Laptm4a	-0.28463	9.72514	41.3179	1.33568e-10	2.79078e-09
Pfkp	-0.331194	9.24369	104.32	1.35059e-10	2.81983e-09
2310036O22Rik	-0.281556	9.55102	41.285	1.35824e-10	2.83368e-09
Cyp2d26	-0.539141	9.42488	45.8464	1.39777e-10	2.91398e-09
Ninj1	-0.276504	9.60092	41.1347	1.46652e-10	3.05504e-09
Evc	0.225821	9.28189	79.5401	1.50666e-10	3.13631e-09
Abi3	-0.289013	9.20712	244.691	1.50899e-10	3.13883e-09
Ivl	0.0764677	9.1842	1925.45	1.58466e-10	3.29378e-09
Ier3	0.298128	9.42051	40.9365	1.62258e-10	3.37009e-09
Cers2	-0.341756	9.37812	53.3859	1.67509e-10	3.47658e-09
Tapbpl	-0.324383	9.22581	140.886	1.72608e-10	3.57977e-09
Spink1	0.262809	12.2867	40.8108	1.73001e-10	3.58525e-09
Gstm5	-0.2811	9.74391	40.7637	1.77209e-10	3.66975e-09
Nt5c	-0.350189	9.29075	72.3715	1.77615e-10	3.67544e-09
Oxa1l	-0.394663	9.27291	86.8196	1.79234e-10	3.7062e-09
Spin1	-0.333472	9.31067	65.789	1.81773e-10	3.75592e-09
Aif1	-0.320411	9.2068	229.826	1.82959e-10	3.77765e-09
Cox4i1	-0.139182	11.5489	40.6955	1.83481e-10	3.78562e-09
Carhsp1	-0.326033	9.28455	71.3716	2.01411e-10	4.1525e-09
Lyn	-0.372594	9.23375	117.229	2.1595e-10	4.44899e-09
Rasgrp2	-0.356172	9.21475	186.55	2.25462e-10	4.64153e-09
Pcnp	0.260976	9.39713	45.5806	2.30224e-10	4.73608e-09
Cst3	-0.310188	9.96342	40.2089	2.35203e-10	4.83496e-09
Skil	0.301721	9.28066	74.7903	2.3799e-10	4.88867e-09
Gtpbp2	-0.36457	9.26246	90.0371	2.39715e-10	4.92048e-09
Rapgef4	0.191036	9.19353	440.764	2.42136e-10	4.96654e-09
Cspp1	0.252232	9.31334	64.4951	2.43054e-10	4.98172e-09
Ifrd1	0.28125	9.29306	70.291	2.46805e-10	5.05489e-09
2700094K13Rik	-0.348845	9.27333	77.9626	2.49014e-10	5.09642e-09
Tmem50a	-0.33336	9.31638	58.8599	2.49376e-10	5.1001e-09
Cpn1	-0.448569	9.39339	48.5052	2.55179e-10	5.21496e-09
Fbxw9	-0.298561	9.22069	151.539	2.57288e-10	5.25423e-09
Adgrl4	0.215797	9.21471	158.499	2.58219e-10	5.26941e-09
Abca3	-0.322301	9.49103	40.0149	2.59696e-10	5.29568e-09
Eif4b	-0.325549	9.4193	46.2683	2.60838e-10	5.3151e-09
Cldn7	-0.340353	9.26759	73.8906	2.61866e-10	5.33217e-09
Adrbk1	-0.353656	9.23867	112.856	2.62552e-10	5.34225e-09
Tnrc6a	-0.369598	9.39593	51.3503	2.80471e-10	5.70271e-09
Sec61a1	-0.348998	9.31371	65.0505	2.88958e-10	5.871e-09
Pxn	-0.348575	9.32136	62.2303	2.96479e-10	6.01946e-09
Xylt1	0.204168	9.21722	163.129	2.98087e-10	6.04771e-09
Nr1d2	0.265996	9.27788	75.1607	2.98437e-10	6.05042e-09
C130074G19Rik	-0.300232	9.44085	42.6591	3.02839e-10	6.13522e-09
Hoxb5os	-0.374756	9.27764	70.1272	3.03058e-10	6.13522e-09
Ap2a2	-0.389043	9.47629	45.6636	3.1362e-10	6.34445e-09
Alad	-0.355558	9.35021	56.0755	3.16943e-10	6.40704e-09
Phc2	-0.309401	9.23248	117.971	3.22144e-10	6.5075e-09
Gt(ROSA)26Sor	0.301885	9.29888	65.1254	3.25709e-10	6.57477e-09
Itm2c	-0.335481	9.28686	69.9063	3.27027e-10	6.59662e-09
Cope	-0.276907	9.46133	40.0046	3.31321e-10	6.67842e-09
Dok3	-0.270599	9.20293	292.539	3.33753e-10	6.72259e-09
Anxa6	-0.335242	9.25101	92.1664	3.34043e-10	6.7236e-09
Tpk1	0.230425	9.27693	74.6792	3.36438e-10	6.76695e-09
Ccnd1	-0.462585	9.49131	39.4789	3.41429e-10	6.86241e-09
Serbp1	-0.278075	9.59184	39.3505	3.64562e-10	7.32209e-09
Crat	-0.41524	9.30414	71.8349	3.70483e-10	7.43569e-09
Itgav	-0.288121	9.49641	39.3026	3.7359e-10	7.49267e-09
Me3	-0.358153	9.26222	84.8957	3.75497e-10	7.52553e-09
Azgp1	0.260001	9.22333	133.894	3.78006e-10	7.57039e-09
Mgat5	0.268066	9.23369	115.51	3.89224e-10	7.78948e-09
Slc7a9	-0.411862	9.37202	52.3816	3.89747e-10	7.79438e-09
RP23-306P12.3	-0.0825791	9.47522	39.1465	4.04599e-10	8.08563e-09
Gsta4	0.254652	9.26273	66.6688	4.0757e-10	8.1392e-09
Gm6563	0.265239	9.2361	110.925	4.11102e-10	8.20387e-09
Tacc1	-0.332173	9.2517	90.9086	4.12647e-10	8.22884e-09
Sell	-0.270377	9.20849	194.892	4.14042e-10	8.25079e-09
Nod2	0.160873	9.18719	975.007	4.16569e-10	8.29524e-09
Lgals9	-0.370551	9.2384	110.489	4.17062e-10	8.29915e-09
Rtfdc1	-0.349124	9.28334	74.4005	4.22808e-10	8.40751e-09
Agt	-0.409348	9.23076	135.37	4.25446e-10	8.45396e-09
Ndufab1	0.193461	10.1402	39.0436	4.2644e-10	8.4677e-09
Hnrnpc	0.262316	9.38207	46.9322	4.32801e-10	8.58793e-09
Bmyc	-0.301878	9.22194	140.485	4.35083e-10	8.6271e-09
Snrpg	-0.273612	9.58177	38.937	4.50313e-10	8.92276e-09
Suclg1	-0.265495	9.76074	38.891	4.60999e-10	9.12804e-09
Rab11fip5	-0.380407	9.26958	84.2145	4.68793e-10	9.27581e-09
Vsir	-0.335615	9.20937	223.403	4.71615e-10	9.32505e-09
Slc12a1	-0.522549	9.90566	38.8178	4.78576e-10	9.45601e-09
Idh2	-0.291726	9.67226	38.7881	4.85891e-10	9.5908e-09
Larp1	-0.351225	9.30331	65.1809	4.86083e-10	9.5908e-09
Glmp	-0.34048	9.32863	59.448	4.86541e-10	9.59308e-09
Bckdk	-0.372769	9.31006	66.3302	4.9449e-10	9.74294e-09
Myl9	0.195543	9.19873	275.056	4.9815e-10	9.80816e-09
Zfyve19	-0.305702	9.22374	138.21	5.02898e-10	9.89469e-09
Slc25a3	-0.214879	10.2647	38.6828	5.12756e-10	1.00816e-08
Tpst2	-0.320854	9.23347	113.461	5.19209e-10	1.02013e-08
Gars	-0.323269	9.24555	98.0837	5.52543e-10	1.08486e-08
Slc5a12	0.112212	9.47574	38.4461	5.78655e-10	1.13533e-08
Ndrg2	-0.33442	9.32687	55.4434	5.93867e-10	1.16436e-08
Ctdnep1	-0.344426	9.26439	83.0818	5.99581e-10	1.17474e-08
Ost4	0.203464	10.0278	38.3078	6.21052e-10	1.21596e-08
Madd	-0.274491	9.20862	207.3	6.28757e-10	1.23018e-08
Gpihbp1	0.209415	9.21467	150.521	6.34587e-10	1.24072e-08
Nubp1	-0.338345	9.27952	73.5788	6.6102e-10	1.2915e-08
Sh2b1	-0.334357	9.23348	117.897	6.7282e-10	1.31364e-08
D630024D03Rik	0.175715	9.25078	97.4729	6.78082e-10	1.32299e-08
Chd3	0.16586	9.48637	41.2656	6.802e-10	1.3262e-08
Hnrnpa3	0.240009	9.66156	38.0946	6.92546e-10	1.34933e-08
Cuedc2	-0.341777	9.29624	68.0659	6.99749e-10	1.36242e-08
Ptger3	-0.309942	9.22028	139.361	7.13228e-10	1.3877e-08
Gm27216	0.215763	9.26557	78.2575	7.20456e-10	1.40079e-08
Sh3glb1	-0.282409	9.44319	40.3423	7.262e-10	1.41097e-08
Wwp1	0.19878	9.42472	41.2451	7.29324e-10	1.41606e-08
Sirpa	-0.32478	9.24142	98.2083	7.36364e-10	1.42874e-08
Atad3a	-0.417006	9.27425	82.7254	7.38679e-10	1.43224e-08
Aco2	-0.277549	9.7893	37.9439	7.48013e-10	1.44933e-08
Arpc4	-0.333608	9.35951	48.0279	7.53444e-10	1.45885e-08
Trabd	-0.341191	9.29603	67.5303	7.6595e-10	1.48204e-08
Prdm5	0.179661	9.20431	234.158	7.66781e-10	1.48262e-08
Elovl1	-0.365163	9.31635	61.947	7.88962e-10	1.52446e-08
Taf6l	-0.332748	9.3245	58.3467	7.99293e-10	1.54335e-08
G0s2	-0.373559	9.68051	37.7718	8.16796e-10	1.57606e-08
Tmem14c	-0.319814	9.51683	39.6908	8.3762e-10	1.61513e-08
Nub1	-0.314514	9.24594	94.7744	8.57785e-10	1.65287e-08
Lrrc25	-0.34531	9.2074	231.528	8.76023e-10	1.68686e-08
Rnf10	-0.359391	9.37844	51.2979	8.91431e-10	1.71494e-08
Tmem19	-0.365511	9.33513	57.1215	8.91831e-10	1.71494e-08
Slc5a1	-0.328268	9.24841	88.8795	9.13161e-10	1.75475e-08
Lgals8	-0.332961	9.29629	65.796	9.2516e-10	1.77659e-08
Fis1	-0.244074	9.74423	37.5203	9.28886e-10	1.78252e-08
Pafah1b3	-0.296514	9.22259	134.566	9.30335e-10	1.78408e-08
Rdh16	0.142733	9.3436	55.2492	9.46439e-10	1.81372e-08
Arrdc1	-0.302559	9.22538	128.583	9.54573e-10	1.82805e-08
Krt10	0.27237	9.28566	67.6303	9.56395e-10	1.83029e-08
Cybb	-0.448044	9.24016	97.6325	9.70871e-10	1.85672e-08
Txnip	-0.307546	9.7523	37.4277	9.73908e-10	1.86126e-08
Cd44	-0.382981	9.23181	109.187	9.75385e-10	1.86281e-08
Dok4	-0.221363	9.20214	248.344	9.8141e-10	1.87304e-08
Qars	-0.347424	9.26047	84.932	1.0113e-09	1.92877e-08
Sqstm1	-0.265377	9.55758	37.3451	1.01591e-09	1.93624e-08
Pcyt2	0.127502	9.46349	41.9671	1.01987e-09	1.94247e-08
Eif3c	-0.327787	9.33923	53.717	1.0229e-09	1.94692e-08
Wipi1	-0.319166	9.23387	112.008	1.05396e-09	2.00467e-08
Pop7	-0.326341	9.26599	79.0763	1.05721e-09	2.00948e-08
Bhmt2	0.0343017	9.33973	56.0775	1.06366e-09	2.02037e-08
Tacc2	-0.311744	9.44525	39.3659	1.09659e-09	2.0815e-08
Cttn	-0.320847	9.30999	58.2683	1.10673e-09	2.09934e-08
Gsk3a	-0.348043	9.25411	89.5199	1.11995e-09	2.12298e-08
A230050P20Rik	-0.208093	9.19881	297.719	1.12718e-09	2.13524e-08
Lilrb4a	-0.387865	9.21483	168.794	1.13359e-09	2.14593e-08
Pnisr	0.183537	9.5036	37.0821	1.16218e-09	2.19856e-08
Osbpl8	0.211643	9.36037	48.3925	1.18189e-09	2.23434e-08
Rab8a	-0.338359	9.31012	60.9676	1.21454e-09	2.29451e-08
Cct7	-0.318196	9.34937	51.3273	1.21936e-09	2.30206e-08
Suclg2	-0.251473	9.77231	36.9577	1.23853e-09	2.33668e-08
Dda1	-0.32387	9.26578	77.4977	1.28203e-09	2.41713e-08
Tmc4	-0.280896	9.21851	145.823	1.32019e-09	2.48739e-08
Ftl1	-0.186282	13.3174	36.8255	1.32517e-09	2.4951e-08
Spns2	-0.349702	9.23275	114.298	1.33147e-09	2.50528e-08
Usp12	-0.31557	9.24283	97.0051	1.33552e-09	2.51121e-08
Mrps36	0.195655	9.69453	36.8057	1.33867e-09	2.51544e-08
Paip1	0.263529	9.32973	51.0167	1.35669e-09	2.54759e-08
Actr1b	-0.360564	9.29531	67.3615	1.36651e-09	2.56431e-08
Cox7a1	0.266505	9.3361	47.3721	1.39835e-09	2.62231e-08
Ykt6	-0.332146	9.2552	86.8248	1.41413e-09	2.65013e-08
Epc1	0.280791	9.26535	76.9522	1.47753e-09	2.76708e-08
Ubiad1	0.23213	9.2169	144.26	1.535e-09	2.87279e-08
Bcl7c	-0.340415	9.31198	60.114	1.55281e-09	2.90419e-08
Endog	-0.313553	9.38004	46.4177	1.55485e-09	2.90605e-08
Tmed1	-0.329544	9.24539	95.5814	1.56606e-09	2.92505e-08
Flna	-0.387042	9.24458	90.2991	1.56956e-09	2.92964e-08
Rdh10	0.193668	9.29328	64.7111	1.57284e-09	2.93381e-08
Alkbh6	-0.326915	9.25624	84.1965	1.61067e-09	3.00236e-08
Poldip2	-0.337563	9.34219	53.7401	1.62956e-09	3.03555e-08
Galnt3	0.259705	9.2924	62.6427	1.65279e-09	3.07679e-08
Mark2	-0.365422	9.32179	59.0187	1.66211e-09	3.09207e-08
Stxbp2	-0.349183	9.29393	65.5259	1.76534e-09	3.28193e-08
Ccdc141	0.170401	9.33183	55.3625	1.80126e-09	3.34649e-08
Slc25a1	-0.322522	9.31153	58.0666	1.82511e-09	3.38856e-08
Nudt18	-0.283988	9.21529	156.412	1.8456e-09	3.42433e-08
Aurkaip1	-0.261625	9.53625	36.1446	1.8776e-09	3.4814e-08
Upk1b	0.124303	9.19035	548.869	1.9305e-09	3.57711e-08
Mrpl30	-0.253396	9.67022	36.0834	1.93732e-09	3.58737e-08
Ubl4a	-0.3046	9.33238	51.9134	2.0247e-09	3.7467e-08
Met	0.257746	9.31812	52.603	2.03046e-09	3.75487e-08
Nudt21	-0.316098	9.28421	64.9391	2.0669e-09	3.81975e-08
Clec4a1	-0.481675	9.226	124.307	2.08755e-09	3.85535e-08
Psma4	-0.261644	9.58538	35.9155	2.11118e-09	3.89643e-08
H2-Q4	-0.390315	9.29314	66.39	2.14821e-09	3.96217e-08
Eif4a2	0.212917	9.76797	35.8709	2.15996e-09	3.98122e-08
Tmem55b	-0.326604	9.2639	77.9617	2.26225e-09	4.16701e-08
Apex1	-0.28714	9.22815	113.441	2.31096e-09	4.25393e-08
Sf3b5	-0.283194	9.44733	40.0291	2.35069e-09	4.32422e-08
Zc3hav1	-0.368795	9.27105	76.1453	2.36552e-09	4.34865e-08
Ltbp4	0.134607	9.19163	486.464	2.36795e-09	4.35025e-08
Eif4e2	-0.315972	9.33128	52.9033	2.38126e-09	4.37184e-08
Tsku	0.200495	9.19437	347.405	2.49078e-09	4.56992e-08
Itgb1	-0.300402	9.36321	44.869	2.49402e-09	4.57285e-08
Immp1l	0.248629	9.39451	40.4686	2.50097e-09	4.5826e-08
Cyp7b1	0.180051	9.21868	118.655	2.50612e-09	4.58904e-08
Ece2	-0.253859	9.21219	160.408	2.53099e-09	4.63155e-08
Ogfrl1	-0.289633	9.21964	136.328	2.54953e-09	4.66242e-08
Cnn2	-0.379938	9.23943	91.2666	2.62573e-09	4.79864e-08
Ildr1	-0.313869	9.24757	85.3481	2.6453e-09	4.83125e-08
Ntn4	0.284044	9.26517	67.0913	2.64853e-09	4.83399e-08
Mrpl17	-0.25831	9.46707	36.0081	2.66573e-09	4.86223e-08
Abca13	-0.321722	9.29758	49.8608	2.68716e-09	4.89812e-08
Urod	-0.361693	9.26967	77.4652	2.68967e-09	4.89951e-08
Llgl2	-0.355922	9.28729	67.4488	2.74098e-09	4.98972e-08
Ptprcap	-0.34271	9.23222	91.8974	2.81515e-09	5.12142e-08
1700011H14Rik	-0.308022	9.53307	35.3487	2.82212e-09	5.13075e-08
2020-09-01	-0.361145	9.24752	84.9145	2.8568e-09	5.19045e-08
Tbrg1	-0.311258	9.31334	53.3446	2.88645e-09	5.24091e-08
Scnn1a	-0.344415	9.33673	43.2499	2.99547e-09	5.43534e-08
Ypel5	-0.305501	9.27797	66.1168	3.02081e-09	5.47777e-08
Cd37	-0.276749	9.20612	208.701	3.08311e-09	5.58712e-08
Surf1	-0.333297	9.26118	78.4432	3.12536e-09	5.66001e-08
Cnp	-0.231359	9.20549	196.738	3.19897e-09	5.78958e-08
B4galnt1	-0.289348	9.21779	139.535	3.22065e-09	5.82506e-08
Cacfd1	-0.313288	9.26312	75.3581	3.31949e-09	5.99994e-08
Skap2	-0.308268	9.27928	65.0653	3.33613e-09	6.02613e-08
Gimap6	0.275213	9.25707	66.2247	3.34681e-09	6.04152e-08
Casp7	-0.257737	9.20968	177.29	3.58519e-09	6.46502e-08
Miip	-0.312175	9.22119	135.636	3.58603e-09	6.46502e-08
Atp1b1	-0.224955	11.0284	34.8648	3.61585e-09	6.51459e-08
Rps6ka1	-0.243178	9.2045	214.754	3.62443e-09	6.52583e-08
Esd	-0.227559	9.88345	34.8392	3.66375e-09	6.59239e-08
Cds2	-0.322084	9.25329	83.2097	3.70759e-09	6.667e-08
Vamp2	-0.342809	9.29138	63.2774	3.74962e-09	6.73825e-08
Psmc3	-0.277851	9.44491	37.9881	3.76186e-09	6.75591e-08
Tmem259	-0.356035	9.31644	57.302	3.80955e-09	6.83716e-08
Mpnd	-0.326254	9.25723	79.0459	3.81687e-09	6.84591e-08
Cyb561	-0.299382	9.24043	93.2668	3.82227e-09	6.85122e-08
Rps25	-0.177504	10.6394	34.7453	3.84428e-09	6.88625e-08
Fkbp8	-0.307196	9.48577	39.1853	3.92091e-09	7.01903e-08
Rtp4	-0.550454	9.32537	62.9656	3.94323e-09	7.05447e-08
Tmem11	-0.315423	9.2956	60.664	3.97355e-09	7.10417e-08
Trip6	-0.305224	9.25339	81.1089	3.98183e-09	7.11444e-08
Rbm47	0.202777	9.76984	34.6288	4.08062e-09	7.2863e-08
Cisd3	0.191182	9.55298	34.6058	4.12916e-09	7.36827e-08
Cstf3	0.274127	9.24048	91.4402	4.13485e-09	7.37373e-08
Wipf1	-0.24718	9.20774	185.639	4.14028e-09	7.37871e-08
Rp9	-0.352662	9.36291	48.944	4.15961e-09	7.40845e-08
Elf3	0.253248	9.22544	109.103	4.19768e-09	7.47149e-08
Lgals4	-0.404455	9.23133	123.331	4.21324e-09	7.49442e-08
Ebna1bp2	-0.316297	9.2851	64.4088	4.29399e-09	7.63322e-08
Wdr83os	-0.295619	9.37932	43.7853	4.36291e-09	7.7508e-08
Serpinb6a	-0.28625	9.23251	100.069	4.4525e-09	7.90496e-08
Mrps10	-0.311481	9.29836	58.5048	4.54056e-09	8.05619e-08
Mospd3	-0.368849	9.25462	85.6594	4.5565e-09	8.07934e-08
Epn1	-0.335505	9.46138	38.9814	4.75484e-09	8.42569e-08
Akt1	-0.337435	9.2475	88.6772	4.804e-09	8.50743e-08
Adora2b	-0.187342	9.1962	315.178	4.81875e-09	8.52815e-08
Slc25a11	-0.38797	9.42475	44.538	4.82509e-09	8.53398e-08
Slc6a20b	0.0512912	9.36387	48.7028	4.8531e-09	8.57809e-08
Agrn	-0.33249	9.26195	76.1353	4.90697e-09	8.66785e-08
Plp2	-0.308119	9.22395	120.92	4.93629e-09	8.71414e-08
Gjb2	0.226566	9.26758	71.1704	4.98481e-09	8.79425e-08
Gng11	0.244741	9.25545	66.3328	4.99058e-09	8.79889e-08
Polr2e	-0.339054	9.35746	50.1818	5.04138e-09	8.88285e-08
Rnf181	-0.337681	9.57799	34.2063	5.06724e-09	8.92281e-08
Azin1	0.253867	9.36404	43.8616	5.07542e-09	8.9316e-08
Sf3b2	-0.327884	9.34389	49.5795	5.19252e-09	9.13193e-08
Agpat2	-0.329094	9.26547	73.6653	5.26483e-09	9.25327e-08
Srp14	-0.252419	9.51395	34.0854	5.39141e-09	9.46981e-08
Chchd4	-0.342516	9.41892	42.3398	5.40362e-09	9.48531e-08
St13	0.202614	9.75576	34.036	5.52959e-09	9.69883e-08
Med21	0.231062	9.41452	34.0711	5.53219e-09	9.69883e-08
Irf2	-0.329544	9.26272	75.3874	5.66354e-09	9.92288e-08
Ccdc28b	-0.354631	9.23119	108.433	5.869e-09	1.02764e-07
Il1r2	-0.286751	9.20509	206.503	5.97377e-09	1.04534e-07
Hnrnpdl	-0.292482	9.36542	43.9271	5.97925e-09	1.04564e-07
Il12b	0.0541485	9.18386	1355.61	6.03923e-09	1.05547e-07
Gm5914	-0.242767	9.20427	213.953	6.06136e-09	1.05868e-07
Phf11b	-0.350278	9.21784	160.665	6.07298e-09	1.06005e-07
Slc12a9	-0.242332	9.20504	206.8	6.11841e-09	1.06731e-07
Gm14964	-0.339403	9.25858	73.3179	6.18385e-09	1.07805e-07
Trim34a	-0.260716	9.20884	184.894	6.22927e-09	1.0853e-07
Dnajb4	0.266841	9.28422	60.2767	6.27644e-09	1.09283e-07
Cyp1b1	0.0837698	9.18681	751.045	6.2854e-09	1.09371e-07
Mrps33	0.224603	9.58128	33.7705	6.33615e-09	1.10186e-07
Phpt1	-0.289036	9.36457	42.9763	6.57171e-09	1.14212e-07
Atp5j	0.144893	11.0063	33.6845	6.62162e-09	1.15008e-07
Sh3yl1	-0.30096	9.24353	87.8466	6.81126e-09	1.18228e-07
Ppp1r11	0.266415	9.38046	41.9171	6.93074e-09	1.20227e-07
Tbc1d20	-0.31175	9.23887	94.5828	7.08764e-09	1.22873e-07
Supt4a	-0.279445	9.40853	40.1144	7.20812e-09	1.24884e-07
Tmprss2	-0.320664	9.34052	46.0128	7.27588e-09	1.2598e-07
Eaf2	0.158008	9.25868	76.2007	7.31177e-09	1.26523e-07
Mavs	-0.342028	9.26266	75.1069	7.49087e-09	1.29542e-07
Bzw2	-0.2711	9.2223	119.826	7.54314e-09	1.30364e-07
Tnfaip8l2	-0.224167	9.19888	284.765	7.54768e-09	1.30364e-07
Sys1	-0.314018	9.3962	42.061	7.74628e-09	1.33712e-07
Slc25a23	-0.382042	9.27671	69.005	7.80238e-09	1.34597e-07
Fcgr1	-0.156245	9.19189	453.048	7.88592e-09	1.35954e-07
Sgta	-0.346647	9.30476	58.3687	7.90404e-09	1.36146e-07
Sars	-0.301381	9.35191	46.184	7.90674e-09	1.36146e-07
Rps6ka4	-0.264726	9.21632	137.958	7.92197e-09	1.36324e-07
Sla	-0.206397	9.19831	270.659	7.98593e-09	1.3734e-07
Plekhm1	-0.255813	9.21719	132.138	8.07924e-09	1.3886e-07
Plbd2	-0.338136	9.24981	84.4217	8.21543e-09	1.41114e-07
Cdc42ep5	-0.279801	9.21651	136.965	8.37622e-09	1.43787e-07
Dbp	0.171288	9.2293	108.708	8.39204e-09	1.43971e-07
Xpr1	0.212231	9.339	47.7837	8.40966e-09	1.44185e-07
Il15ra	-0.304639	9.23743	94.434	8.43285e-09	1.44494e-07
Tmem63b	-0.315791	9.26678	70.7839	8.44827e-09	1.44669e-07
Lims2	-0.329276	9.26264	70.8336	8.46082e-09	1.44796e-07
Ankrd54	-0.296656	9.22782	110.786	8.50425e-09	1.4545e-07
Fgr	-0.301869	9.20579	218.597	8.54286e-09	1.46021e-07
Gpcpd1	-0.308031	9.26068	71.5117	8.62912e-09	1.47406e-07
Ints2	0.23645	9.28564	59.7503	8.66722e-09	1.47966e-07
Tstd1	0.225268	9.26955	65.1318	8.6938e-09	1.4833e-07
Ppp2cb	-0.312652	9.2766	64.4415	8.73657e-09	1.48969e-07
Nxt1	-0.28754	9.23319	96.5366	8.82264e-09	1.50345e-07
Dohh	-0.327276	9.29576	58.6046	8.9475e-09	1.5238e-07
Hnrnpl	-0.341563	9.35506	47.4488	8.97736e-09	1.52795e-07
Trim12a	-0.393694	9.25744	87.0361	9.23395e-09	1.57067e-07
Rpl35a	-0.156528	11.0701	33.0307	9.26038e-09	1.57421e-07
Ipo5	-0.301732	9.2446	85.797	9.28748e-09	1.57786e-07
Sphk1	-0.225259	9.19958	271.088	9.31661e-09	1.58185e-07
Mrpl23	-0.261704	9.44831	34.8417	9.37056e-09	1.59004e-07
Fbxo44	-0.296891	9.22367	119.024	9.4307e-09	1.59928e-07
Gys1	-0.308157	9.2311	104.967	9.53493e-09	1.61597e-07
Arl6ip5	-0.296184	9.3131	49.7114	9.58219e-09	1.623e-07
Exosc4	-0.308731	9.29797	57.1133	9.71021e-09	1.64369e-07
Dcaf11	-0.336124	9.35814	47.1464	9.79495e-09	1.65703e-07
Gm15883	0.199134	9.2907	57.7614	1.00495e-08	1.69907e-07
Prpf19	-0.323084	9.27797	65.172	1.0057e-08	1.69931e-07
Gm15879	0.160724	9.23081	99.8635	1.02011e-08	1.72263e-07
Ubr4	-0.306665	9.28819	59.5606	1.03212e-08	1.74185e-07
Gmpr	-0.299664	9.35318	44.7328	1.05541e-08	1.78008e-07
Snrpc	-0.316463	9.2918	59.4544	1.06857e-08	1.8012e-07
4833439L19Rik	0.158613	10.0444	32.7359	1.07726e-08	1.81474e-07
Stard4	0.19965	9.26078	75.0818	1.07895e-08	1.8165e-07
Tln1	-0.335454	9.34401	45.8167	1.09837e-08	1.84808e-07
Ncstn	-0.312347	9.26135	72.7343	1.09961e-08	1.84906e-07
Ano6	-0.316787	9.2798	62.7358	1.1035e-08	1.85449e-07
Xpa	-0.304923	9.24294	86.73	1.11898e-08	1.87937e-07
Ugt2b37	0.195609	9.25998	67.908	1.12783e-08	1.89311e-07
Hesx1	-0.2427	9.19857	307.491	1.12986e-08	1.89537e-07
Gnl1	-0.272795	9.22816	103.859	1.1702e-08	1.96187e-07
Nme1	0.19874	9.91508	32.5326	1.19576e-08	2.00352e-07
Slc19a1	-0.342096	9.3374	48.3447	1.2112e-08	2.02817e-07
Tek	0.152773	9.20244	205.069	1.22337e-08	2.04733e-07
Ces1g	0.174142	9.19808	256.927	1.2302e-08	2.05754e-07
Csf2rb	-0.218045	9.1988	272.41	1.23883e-08	2.07074e-07
Idh3b	-0.298172	9.47099	34.7968	1.28016e-08	2.13854e-07
Dusp11	-0.324309	9.38668	41.9175	1.28907e-08	2.15214e-07
Ctxn3	0.163728	9.19385	325.46	1.3102e-08	2.18611e-07
Pef1	-0.319483	9.25977	74.0465	1.33266e-08	2.22226e-07
Sharpin	-0.308598	9.24526	84.9273	1.34148e-08	2.23564e-07
Klf15	0.0831448	9.30458	59.0466	1.34559e-08	2.24115e-07
Gm13528	0.186316	9.19759	259.177	1.35306e-08	2.25226e-07
Slc45a3	-0.311324	9.22754	110.787	1.40099e-08	2.33037e-07
Gipc1	-0.311851	9.27794	62.5499	1.40165e-08	2.33037e-07
Cish	-0.270779	9.22829	101.535	1.4138e-08	2.34918e-07
Hexa	-0.330207	9.25502	73.2905	1.43052e-08	2.37555e-07
Tpd52l2	-0.293766	9.30325	52.5701	1.47123e-08	2.4417e-07
Anapc2	-0.288015	9.23313	96.8349	1.47248e-08	2.44232e-07
Scaf1	-0.281073	9.22972	101.305	1.47491e-08	2.44491e-07
Pilra	-0.401627	9.21528	159.604	1.49756e-08	2.48099e-07
Mprip	-0.339649	9.32138	51.2951	1.50159e-08	2.48619e-07
Pa2g4	-0.31118	9.27877	61.5763	1.55038e-08	2.56546e-07
Gm12678	0.140186	9.19197	392.835	1.55177e-08	2.56624e-07
Psmd2	-0.295674	9.31781	48.805	1.56733e-08	2.59045e-07
St5	-0.272409	9.22734	103.418	1.58284e-08	2.61454e-07
Trp63	0.115844	9.1866	841.81	1.62697e-08	2.68584e-07
Stxbp5l	0.132891	9.20905	172.2	1.63279e-08	2.69387e-07
Uba7	-0.207381	9.19785	284.844	1.63765e-08	2.69929e-07
Man2b1	-0.376015	9.30044	56.5282	1.63801e-08	2.69929e-07
Smlr1	0.174283	9.33512	46.5943	1.654e-08	2.72405e-07
BC029722	-0.353966	9.25864	75.7073	1.65885e-08	2.73042e-07
Set	-0.276034	9.43245	34.8752	1.66233e-08	2.73455e-07
Ikbke	-0.204774	9.19773	280.25	1.70176e-08	2.79775e-07
Snw1	-0.308484	9.29948	54.4391	1.7081e-08	2.80653e-07
Rusc1	-0.224589	9.20504	188.897	1.71601e-08	2.81788e-07
Pdrg1	-0.312074	9.27992	61.0178	1.7855e-08	2.93027e-07
Nfe2l1	-0.29355	9.31834	46.0659	1.79078e-08	2.93722e-07
Chmp1a	-0.33591	9.31222	53.1979	1.82287e-08	2.9881e-07
Dact1	0.0979039	9.18521	1127.14	1.83338e-08	3.00357e-07
Polr2j	-0.252783	9.46277	33.4094	1.84014e-08	3.01289e-07
Prkag1	-0.316508	9.25803	73.4782	1.85425e-08	3.03281e-07
Ptprc	-0.405837	9.26242	61.6861	1.85448e-08	3.03281e-07
Sytl2	-0.252279	9.21514	133.123	1.85661e-08	3.0329e-07
Zfp787	-0.294152	9.39809	39.22	1.8567e-08	3.0329e-07
Unc119	-0.310059	9.20879	186.273	1.88439e-08	3.07633e-07
Tprgl	-0.298865	9.33883	45.046	1.95149e-08	3.18402e-07
Vat1	-0.294469	9.22374	112.95	1.96892e-08	3.21059e-07
B4galt1	0.248311	9.30717	48.9763	1.9801e-08	3.22694e-07
2310011J03Rik	-0.31012	9.2628	69.1473	1.98512e-08	3.23324e-07
Cln6	-0.317121	9.23629	93.3062	1.9898e-08	3.23898e-07
Egln2	-0.315987	9.31268	51.9305	2.02049e-08	3.28703e-07
Bmp2	0.0906743	9.18551	1049.37	2.022e-08	3.28757e-07
RP23-306P12.2	0.154207	9.77169	31.5057	2.02628e-08	3.29262e-07
Avpi1	-0.302167	9.26541	65.7087	2.03246e-08	3.30075e-07
Spsb4	0.104451	9.28926	63.3062	2.04617e-08	3.32108e-07
Sostdc1	-0.566103	9.47462	31.4711	2.06265e-08	3.34588e-07
Impact	0.258789	9.27765	58.4331	2.08818e-08	3.38534e-07
Fam53b	-0.335492	9.23105	101.858	2.09657e-08	3.39698e-07
Dnajc5	-0.278389	9.34778	42.2763	2.10893e-08	3.41503e-07
Itgal	-0.365311	9.22524	114.831	2.14713e-08	3.47487e-07
Ncaph2	-0.325164	9.27817	62.4178	2.15586e-08	3.48698e-07
Nab2	0.20113	9.20383	193.469	2.1587e-08	3.48956e-07
Flywch2	-0.244513	9.20745	173.365	2.16244e-08	3.4936e-07
Tsc1	-0.402358	9.25498	80.5872	2.16988e-08	3.50359e-07
Tmem176b	-0.227882	9.94916	31.358	2.18604e-08	3.52765e-07
Cd300a	-0.272214	9.20438	214.926	2.21983e-08	3.58011e-07
Snap23	0.224683	9.35819	41.9754	2.23077e-08	3.59568e-07
Scn1b	-0.228096	9.20047	237.917	2.23486e-08	3.60021e-07
Myo1c	-0.318008	9.26981	64.3914	2.26194e-08	3.64174e-07
Prps1	-0.288814	9.252	74.0063	2.26324e-08	3.64174e-07
Kdelr1	-0.315882	9.35912	44.4966	2.26792e-08	3.64718e-07
Cmpk2	-0.552346	9.34595	77.7082	2.27332e-08	3.65198e-07
Hdac11	-0.309774	9.22536	110.789	2.27352e-08	3.65198e-07
Gm12454	0.10628	9.18832	525.072	2.29464e-08	3.68379e-07
Uqcrc2	-0.269993	9.52704	31.6261	2.32255e-08	3.72646e-07
Abhd4	-0.28212	9.22796	102.863	2.33184e-08	3.73922e-07
Cideb	0.186816	9.41589	34.5072	2.37246e-08	3.80218e-07
Klf3	-0.324555	9.30754	50.2036	2.39699e-08	3.8393e-07
Peg3	0.175862	9.19235	360.174	2.39888e-08	3.84013e-07
Pbx1	0.236697	9.36737	37.6115	2.40419e-08	3.84642e-07
Emp3	-0.390122	9.28943	45.8881	2.40889e-08	3.85174e-07
Kansl3	-0.378628	9.2848	62.1889	2.41033e-08	3.85185e-07
Stk19	-0.291935	9.25305	74.4216	2.41185e-08	3.85208e-07
Dnmt1	-0.235001	9.20697	172.68	2.41773e-08	3.85927e-07
Ppp5c	-0.339573	9.28192	61.504	2.46623e-08	3.93445e-07
Fbxw5	-0.332991	9.29484	57.0923	2.48248e-08	3.95811e-07
Fcf1	-0.294588	9.29235	54.3096	2.5197e-08	4.01516e-07
Usp18	-0.542568	9.267	111.667	2.63961e-08	4.20386e-07
Ces2b	0.102436	9.18769	592.295	2.69153e-08	4.28411e-07
Ppp1r12c	-0.279312	9.22432	109.642	2.70824e-08	4.30825e-07
Gna11	-0.360367	9.27474	64.7238	2.71259e-08	4.31272e-07
Nudt22	-0.317229	9.23745	90.347	2.7323e-08	4.34159e-07
Car14	0.091369	9.37212	41.3415	2.80581e-08	4.45587e-07
Slco3a1	0.187748	9.35426	39.7324	2.8209e-08	4.4773e-07
Ung	-0.118141	9.1894	541.913	2.88072e-08	4.56965e-07
Faah	-0.356165	9.26995	66.5568	2.91933e-08	4.62828e-07
Imp3	-0.330913	9.30855	53.7638	2.92428e-08	4.63351e-07
Ndfip1	-0.287679	9.30584	49.691	2.93398e-08	4.64625e-07
Lypd3	0.0624258	9.18415	1474.13	2.94907e-08	4.66749e-07
Pold3	-0.224784	9.20656	170.409	2.95473e-08	4.67381e-07
Vps11	-0.267024	9.21743	126.718	2.9803e-08	4.71159e-07
Cyc1	-0.219901	9.93396	30.6978	3.06948e-08	4.84985e-07
Ccl6	-0.636003	9.29135	45.7616	3.13258e-08	4.94676e-07
Slc25a34	-0.387512	9.2255	118.693	3.13949e-08	4.95487e-07
Tmem38b	-0.302015	9.28806	55.4025	3.29349e-08	5.195e-07
Pdk1	-0.345692	9.23746	89.8715	3.31533e-08	5.2265e-07
Renbp	-0.32469	9.28321	57.1379	3.32254e-08	5.23491e-07
Ints6	0.211156	9.20631	165.027	3.36264e-08	5.29511e-07
Sfrp5	0.0842388	9.18454	1471.27	3.39277e-08	5.33956e-07
Vsig2	0.101941	9.18656	829.728	3.42093e-08	5.38085e-07
Ppa2	0.177255	9.46684	31.3512	3.44304e-08	5.41259e-07
Jade2	-0.240707	9.21458	129.485	3.45445e-08	5.42747e-07
Lcp1	-0.399396	9.27552	53.0449	3.49965e-08	5.4954e-07
Mcoln3	0.144667	9.20555	162.157	3.57527e-08	5.61102e-07
Adap2os	0.135851	9.25557	71.6439	3.58164e-08	5.61786e-07
Gm26518	0.195098	9.20542	175.083	3.60809e-08	5.65618e-07
Hnrnpd	-0.289513	9.3387	42.881	3.63338e-08	5.69025e-07
Krt18	0.264203	9.24239	63.0762	3.63389e-08	5.69025e-07
Tomm22	-0.273315	9.44654	34.1747	3.64106e-08	5.69829e-07
Pvrl1	-0.307583	9.23181	95.4032	3.67473e-08	5.74776e-07
Cdc37	-0.326542	9.34546	43.9894	3.69739e-08	5.77998e-07
Cxcl16	-0.2869	9.3436	38.7561	3.70191e-08	5.78381e-07
Scd1	0.114031	9.20498	147.269	3.71459e-08	5.80039e-07
Acot8	-0.312287	9.27496	61.0724	3.76269e-08	5.87223e-07
Irx3	0.196534	9.2803	56.5236	3.81591e-08	5.95198e-07
Mpp5	0.248101	9.26402	63.1511	3.87297e-08	6.03761e-07
Dok2	-0.28761	9.20596	180.128	3.88079e-08	6.04643e-07
Btd	-0.320245	9.24365	81.8861	3.88488e-08	6.04944e-07
Prmt1	-0.286849	9.26435	61.9343	3.91124e-08	6.08709e-07
Hsd17b4	-0.308083	9.36806	40.3059	3.95479e-08	6.15145e-07
Ldha	-0.223347	9.88405	30.1887	3.98817e-08	6.19994e-07
Arpp19	0.173986	10.2058	30.1612	4.0451e-08	6.28495e-07
Cox5b	-0.148436	10.8214	30.13	4.11061e-08	6.38318e-07
Grb2	-0.313629	9.2646	63.9129	4.22576e-08	6.55835e-07
Ube2e2	-0.255515	9.22136	109.448	4.30998e-08	6.68536e-07
Eif3b	-0.296674	9.30769	49.2693	4.3893e-08	6.80463e-07
Mme	0.2357	9.26368	58.6	4.42798e-08	6.8608e-07
Thap3	-0.328881	9.25111	75.5014	4.45703e-08	6.90198e-07
Kitl	0.221961	9.21191	132.355	4.46741e-08	6.91424e-07
Fam134a	-0.335855	9.29609	54.7192	4.50369e-08	6.96654e-07
Mpv17l2	-0.321072	9.29095	56.2319	4.60023e-08	7.11193e-07
Adamts15	0.0910488	9.19958	203.941	4.67729e-08	7.22709e-07
Myo19	-0.27032	9.21599	129.395	4.75985e-08	7.35059e-07
Tpx2	0.099723	9.18969	476.913	4.93516e-08	7.61712e-07
Ifnar2	-0.282212	9.23338	86.6686	4.95545e-08	7.64422e-07
Mettl9	-0.280577	9.37233	39.5302	4.9616e-08	7.64949e-07
Arl4a	0.265052	9.30757	47.1944	5.02828e-08	7.74803e-07
Tor1aip1	-0.293113	9.36127	39.1593	5.04586e-08	7.77084e-07
Hnrnpa2b1	0.194239	9.85895	29.6985	5.13277e-08	7.90034e-07
Cenpf	0.101459	9.19311	357.008	5.17743e-08	7.9647e-07
Fmnl1	-0.362402	9.25007	74.8982	5.2026e-08	7.99903e-07
Ccrl2	0.176507	9.21131	142.269	5.21706e-08	8.01595e-07
Vcp	-0.242412	9.55326	29.666	5.21933e-08	8.01595e-07
Myo10	-0.297939	9.26911	60.8543	5.32711e-08	8.17699e-07
Polr2k	0.212585	9.58997	29.6251	5.33036e-08	8.1775e-07
Nfat5	0.243063	9.3338	40.6013	5.35822e-08	8.21574e-07
Gm43109	0.0555822	9.18305	2373.38	5.41682e-08	8.30105e-07
Loxl2	0.150512	9.19402	296.245	5.44359e-08	8.33751e-07
Arnt2	-0.272458	9.22663	98.4891	5.46894e-08	8.37138e-07
Galnt11	0.162872	9.7605	29.5743	5.47169e-08	8.37138e-07
Sap30bp	-0.263394	9.22764	96.8622	5.49489e-08	8.40229e-07
Rbl1	-0.207684	9.20122	210.742	5.50148e-08	8.40778e-07
Eif4a3	-0.286712	9.25419	68.7574	5.58326e-08	8.5281e-07
Psmf1	-0.268794	9.23268	88.0074	5.68719e-08	8.68211e-07
Zyx	-0.310451	9.27942	55.1592	5.72097e-08	8.72893e-07
Raly	-0.27039	9.41304	31.7022	5.7245e-08	8.72954e-07
Rala	-0.280907	9.33013	43.087	5.74506e-08	8.75613e-07
Cst7	-0.171057	9.19503	289.508	5.98126e-08	9.11117e-07
Rtkn	-0.29773	9.22363	108.852	6.01711e-08	9.15705e-07
Rab17	-0.35586	9.27161	63.2388	6.01792e-08	9.15705e-07
Gpx4	-0.156671	11.2438	29.3755	6.06118e-08	9.21787e-07
Eif3k	-0.231672	9.6544	29.358	6.11604e-08	9.29625e-07
Erdr1	0.171135	9.43458	29.4129	6.1402e-08	9.32791e-07
Smdt1	0.15852	10.2148	29.3406	6.17137e-08	9.37018e-07
Mgrn1	-0.359839	9.31388	50.2033	6.23229e-08	9.45754e-07
Cav1	0.228698	9.23041	77.8286	6.34425e-08	9.62223e-07
Snx17	-0.298202	9.30916	48.4193	6.38853e-08	9.68022e-07
Atp6v1f	-0.187729	10.1461	29.2731	6.3894e-08	9.68022e-07
Bcat2	-0.345934	9.27694	58.6349	6.49061e-08	9.82823e-07
Csnk1d	-0.302175	9.26689	61.3013	6.55322e-08	9.91768e-07
Actr1a	-0.313471	9.2627	65.0111	6.57823e-08	9.95016e-07
BC089597	-0.51424	9.3136	50.4899	6.69923e-08	1.01277e-06
Gm8186	-0.28818	9.29752	49.4213	6.77627e-08	1.02386e-06
Atp5g3	-0.164968	10.7452	29.1537	6.79472e-08	1.0261e-06
Necap2	-0.303898	9.26881	61.352	6.97942e-08	1.05342e-06
Ets1	0.207859	9.21131	129.308	6.98884e-08	1.05419e-06
0610040J01Rik	-0.292629	9.27317	57.6731	6.99497e-08	1.05419e-06
Hoxb6	-0.306591	9.24726	73.1252	6.99578e-08	1.05419e-06
Fubp1	0.222164	9.37188	36.0678	7.04125e-08	1.06047e-06
Ik	-0.279777	9.27929	54.0392	7.04827e-08	1.06095e-06
Aldh1a7	-0.297695	9.20862	178.635	7.12043e-08	1.07124e-06
Naga	-0.29747	9.2514	71.0744	7.13271e-08	1.07251e-06
Rrp7a	-0.294133	9.24724	74.2094	7.14256e-08	1.07342e-06
Gpat4	-0.31606	9.26692	62.5379	7.15944e-08	1.07538e-06
Egf	-0.383708	10.226	29.0463	7.18118e-08	1.07806e-06
Nup93	-0.238037	9.2112	137.323	7.3215e-08	1.09854e-06
Med9	-0.277333	9.24835	70.9812	7.35977e-08	1.10369e-06
Amdhd2	-0.332509	9.30715	50.1727	7.43278e-08	1.11404e-06
Mrps23	-0.313563	9.31001	48.0223	7.63101e-08	1.14314e-06
Ar	0.0967797	9.34102	42.5225	7.72096e-08	1.156e-06
Dab2	-0.226691	9.91727	28.8741	7.84736e-08	1.17429e-06
Wdr5	-0.268766	9.22381	102.93	7.87477e-08	1.17777e-06
Sdha	-0.218515	9.81617	28.8228	8.05748e-08	1.20445e-06
Sepp1	0.195658	10.9803	28.7964	8.16785e-08	1.2203e-06
Slc7a8	0.16812	9.38752	33.8472	8.17689e-08	1.22099e-06
Uap1l1	-0.31865	9.31749	44.6246	8.20103e-08	1.22395e-06
Amotl2	-0.329072	9.29574	50.9873	8.27735e-08	1.23468e-06
Erbb2	-0.32065	9.23909	82.5717	8.52773e-08	1.27135e-06
Rpp21	-0.249138	9.42976	31.9037	8.59475e-08	1.28066e-06
Tmem243	-0.262302	9.36744	35.3669	8.69596e-08	1.29505e-06
Cln3	-0.274514	9.22055	111.104	8.72677e-08	1.29895e-06
Atp2b1	0.226855	9.3324	42.1338	8.75536e-08	1.30251e-06
Foxa1	0.0839306	9.18539	921.772	8.79481e-08	1.30768e-06
Chrac1	-0.264213	9.36536	36.6983	8.89696e-08	1.32217e-06
C1qa	-0.331835	9.21892	94.4392	8.98982e-08	1.33526e-06
Dcst1	0.104105	9.19067	349.143	9.12052e-08	1.35396e-06
Lrrfip2	-0.278244	9.2546	65.4639	9.27926e-08	1.37679e-06
Rnpepl1	-0.323421	9.34451	41.9054	9.69313e-08	1.43744e-06
Uqcr10	0.12512	11.3738	28.456	9.73434e-08	1.44278e-06
Pvrl2	-0.267891	9.23512	81.09	9.79472e-08	1.45097e-06
Ctbp1	-0.298081	9.35261	40.3909	9.919e-08	1.4686e-06
Ric8	-0.244901	9.21605	118.124	9.98686e-08	1.47786e-06
Nek6	-0.182646	9.19951	208.234	1.00054e-07	1.47983e-06
Rpl6	-0.17636	10.5816	28.401	1.00142e-07	1.48034e-06
Irak3	-0.172571	9.19433	316.84	1.0198e-07	1.50673e-06
Rpl37a	-0.127013	11.5159	28.3384	1.03425e-07	1.52726e-06
Clpx	-0.301054	9.36773	37.7813	1.04064e-07	1.53589e-06
Ttc9c	-0.280254	9.24641	71.9624	1.05352e-07	1.55409e-06
Rab31	-0.179353	9.19736	243.764	1.05803e-07	1.55992e-06
Ikzf1	-0.240306	9.2073	155.293	1.07072e-07	1.57779e-06
Ctse	0.118947	9.18849	520.165	1.08637e-07	1.60002e-06
Rnf186	0.240284	9.28292	48.3265	1.08753e-07	1.60088e-06
Epha2	0.155656	9.19546	268.931	1.09953e-07	1.61769e-06
Creld2	0.24392	9.28364	49.5748	1.10616e-07	1.6266e-06
Ndufa13	0.133121	10.7149	28.193	1.1148e-07	1.63843e-06
Pcbd1	0.142175	9.87087	28.1703	1.12792e-07	1.65685e-06
Ogt	0.168667	9.56917	28.1535	1.13774e-07	1.67039e-06
Zfp672	-0.284536	9.29378	50.4485	1.1491e-07	1.68619e-06
Hspa1b	0.238978	9.22864	83.2547	1.1525e-07	1.69029e-06
Hnrnpul1	-0.318587	9.2957	50.5766	1.16143e-07	1.70249e-06
Slc35g1	0.232931	9.23151	80.4384	1.16516e-07	1.70707e-06
Tmf1	0.234905	9.31946	39.4278	1.17049e-07	1.71398e-06
Tgm1	-0.251409	9.20723	158.774	1.18049e-07	1.72772e-06
Leprotl1	-0.280918	9.27343	55.1072	1.18811e-07	1.73797e-06
Adamts6	0.101425	9.18985	413.548	1.22439e-07	1.7901e-06
Lamb1	-0.296009	9.28892	50.3445	1.23518e-07	1.80494e-06
Cdh5	0.175641	9.21357	119.024	1.25395e-07	1.8314e-06
Slc8b1	-0.234729	9.21199	129.084	1.25561e-07	1.83288e-06
Rnpep	-0.306276	9.26465	59.6704	1.25891e-07	1.83674e-06
Tnfaip8l1	0.128203	9.1882	590.16	1.27301e-07	1.85634e-06
Lif	0.055494	9.1851	1007.6	1.27982e-07	1.86529e-06
Tor2a	-0.287115	9.24734	70.8699	1.2816e-07	1.86692e-06
Mlec	0.183723	9.56027	27.9121	1.28854e-07	1.87606e-06
Plscr3	-0.243834	9.2134	126.038	1.28926e-07	1.87612e-06
Cd2bp2	-0.281491	9.24224	73.9511	1.29934e-07	1.88981e-06
Fam107b	0.191564	9.33417	41.2139	1.30007e-07	1.88989e-06
Cops5	-0.288398	9.31254	45.1483	1.30324e-07	1.89352e-06
Frzb	0.117978	9.19765	200.725	1.33649e-07	1.94082e-06
Csrp2	0.0957864	9.59615	27.8382	1.3386e-07	1.94288e-06
Smg5	-0.301508	9.24052	77.9878	1.35084e-07	1.95962e-06
Col8a1	0.191884	9.19787	223.31	1.36324e-07	1.9766e-06
Ncf2	-0.280189	9.20378	206.828	1.3685e-07	1.98319e-06
Nisch	-0.275071	9.50544	29.1999	1.38327e-07	2.00357e-06
Synpr	0.0419007	9.18289	1765.78	1.40254e-07	2.03042e-06
Prkab1	-0.286337	9.26744	57.202	1.43145e-07	2.0712e-06
Ly86	-0.176452	9.19543	265.159	1.44637e-07	2.09171e-06
Adamts4	0.0548632	9.1854	999.526	1.44834e-07	2.09347e-06
Sav1	-0.28816	9.27855	53.5627	1.45224e-07	2.09803e-06
Wsb2	-0.302553	9.33979	40.4351	1.48143e-07	2.1391e-06
Bcl7a	0.196107	9.34163	39.2231	1.50207e-07	2.16778e-06
Edem2	-0.283729	9.237	79.3939	1.50654e-07	2.17211e-06
Ptprd	0.146375	9.37342	36.3016	1.50662e-07	2.17211e-06
Ppp1cc	-0.23707	9.42582	29.0025	1.51565e-07	2.184e-06
1500011B03Rik	-0.266746	9.22789	90.3954	1.51951e-07	2.18843e-06
Mapk3	-0.323391	9.26059	61.8099	1.54835e-07	2.22883e-06
Sel1l	0.227837	9.33037	39.3805	1.54957e-07	2.22944e-06
Wdr1	-0.26033	9.35027	35.0824	1.55345e-07	2.23387e-06
Cebpb	0.133226	10.0153	27.5426	1.55916e-07	2.24093e-06
Pcsk4	-0.176679	9.19432	325.189	1.57285e-07	2.25944e-06
Usp24	-0.294611	9.29289	49.1725	1.5771e-07	2.26372e-06
Unc93b1	-0.244916	9.21904	102.425	1.57744e-07	2.26372e-06
Dcaf13	-0.24685	9.21972	105.426	1.59718e-07	2.29002e-06
Sdcbp	-0.230479	9.50692	27.4956	1.5974e-07	2.29002e-06
Fam84b	-0.285398	9.27701	52.5509	1.60309e-07	2.297e-06
BC029214	-0.300969	9.24583	72.1356	1.6081e-07	2.303e-06
Psmd13	-0.293624	9.30576	46.7465	1.6165e-07	2.31384e-06
Ndufs3	-0.21973	9.65964	27.4407	1.64333e-07	2.35105e-06
Cbx6	-0.308811	9.25512	64.4276	1.65278e-07	2.36335e-06
Manbal	-0.274465	9.24334	71.6402	1.68555e-07	2.40899e-06
Mgat3	0.0384133	9.24076	81.4645	1.70282e-07	2.43242e-06
Pml	-0.294515	9.22445	102.181	1.70509e-07	2.43443e-06
Sirt2	-0.329469	9.29346	50.7256	1.71687e-07	2.45e-06
Mbd3	-0.330204	9.33455	42.6359	1.74825e-07	2.4935e-06
Spg21	-0.286194	9.29667	47.4103	1.75497e-07	2.50181e-06
Tamm41	-0.214012	9.20852	138.892	1.76808e-07	2.51922e-06
Cnksr1	-0.1824	9.20036	193.016	1.78409e-07	2.54074e-06
Kifc3	-0.30765	9.25919	62.8992	1.79666e-07	2.55734e-06
Sfxn1	0.130875	9.71755	27.2657	1.79866e-07	2.55888e-06
Rarres2	-0.280298	9.26354	52.4555	1.81083e-07	2.57489e-06
Ifngr2	-0.276834	9.24152	70.3156	1.82448e-07	2.59298e-06
Ccdc109b	-0.14597	9.19245	347.451	1.82695e-07	2.59518e-06
Apbb1ip	-0.241617	9.20407	181.334	1.83957e-07	2.61178e-06
Eif4a1	-0.221688	9.65725	27.2209	1.84073e-07	2.61211e-06
Arpin	-0.225194	9.21197	125.005	1.84933e-07	2.62298e-06
Hoxc9	-0.247146	9.22195	97.4753	1.86877e-07	2.64921e-06
Tmem123	-0.271579	9.28948	44.0171	1.90375e-07	2.69743e-06
Rrad	0.179207	9.20441	154.731	1.91539e-07	2.71212e-06
Hmgcr	0.23193	9.22574	86.1334	1.91606e-07	2.71212e-06
Gipc2	-0.242953	9.48046	27.1322	1.92695e-07	2.72616e-06
Arhgap42	0.218677	9.29053	47.8134	1.96143e-07	2.77354e-06
Trim26	-0.289446	9.23537	80.6063	1.9643e-07	2.7762e-06
Lgr4	-0.245692	9.53331	27.0635	1.99659e-07	2.82041e-06
Ypel3	-0.244632	9.48824	27.5746	2.01837e-07	2.84975e-06
Myl12b	-0.236618	9.48983	27.0403	2.02064e-07	2.8515e-06
Tbl3	-0.232209	9.2125	124.123	2.03667e-07	2.87268e-06
Ptdss2	-0.348085	9.27522	57.3092	2.07361e-07	2.9233e-06
Hist2h3c1	0.0988312	9.18959	398.752	2.07882e-07	2.92918e-06
Sgms2	-0.26448	9.43859	26.9641	2.10177e-07	2.96003e-06
Cth	0.0593937	9.3784	35.9999	2.11765e-07	2.9809e-06
Myd88	-0.262844	9.22404	94.7626	2.1389e-07	3.00905e-06
Cldn15	0.11364	9.19375	298.88	2.1398e-07	3.00905e-06
Gstt2	-0.235155	9.57502	26.9267	2.14268e-07	3.01158e-06
Acot9	-0.275326	9.27405	51.7794	2.14844e-07	3.01817e-06
Rsrp1	-0.226012	9.95926	26.8866	2.18753e-07	3.07154e-06
F2rl1	-0.258884	9.22872	85.3973	2.22829e-07	3.1272e-06
Aimp1	-0.289829	9.28922	48.7463	2.28733e-07	3.20845e-06
Ddah2	-0.263073	9.22574	89.1506	2.30116e-07	3.22623e-06
Mut	0.186029	9.41483	30.144	2.30281e-07	3.22692e-06
D930016D06Rik	0.204074	9.26063	57.6713	2.32517e-07	3.25664e-06
[truncated: 3,820 more rows]

## Sheet: 4hr_pseudobulk
	logFC	logCPM	F	PValue	FDR
Cxcl10	5.0786	9.84845	36174.2	0	0
Rsad2	4.91595	9.81998	28006.4	0	0
Ifit1	4.65066	9.78675	27992.5	0	0
Ifit3	3.98606	9.58183	20835.8	0	0
Ifit2	3.65991	9.43478	21969	0	0
Ifit3b	3.56098	9.40333	19933.5	0	0
Cmpk2	3.26154	9.34595	16689.9	0	0
Isg15	3.18715	9.57366	8719.48	0	0
Cxcl1	3.18076	9.65004	8440.38	0	0
Gbp7	2.81561	9.3582	10314.8	0	0
Mt2	2.7923	10.2062	4255.99	0	0
Ccl2	2.72879	9.40184	5054.49	0	0
Iigp1	2.70591	9.49437	7841.29	0	0
Rnf213	2.63268	9.33226	9095.53	0	0
Parp14	2.62399	9.29914	10730.3	0	0
Trim30a	2.54944	9.30751	8425.07	0	0
Gbp2	2.53647	9.65895	7829.8	0	0
Irgm1	2.53279	9.67802	6368.99	0	0
Oasl1	2.47021	9.25141	16959.2	0	0
Usp18	2.44528	9.267	11670.6	0	0
Hba-a1	2.38406	9.47611	2687.76	0	0
Ccl4	2.30821	9.412	2612.05	0	0
Hbb-bs	2.30735	9.65636	2140.31	0	0
Igtp	2.24045	9.42259	5821.36	0	0
Ifi47	2.16703	9.32246	6004.97	0	0
Fgg	2.14496	9.87084	4210.22	0	0
Herc6	2.14126	9.26059	7881.13	0	0
Klf6	2.10643	9.44162	3447.8	0	0
Tmem252	2.0846	9.86011	3311.78	0	0
Fga	2.05504	9.73729	3829.06	0	0
Isg20	2.027	9.2466	7188.71	0	0
Tor3a	1.9521	9.25154	6359.53	0	0
Cebpb	1.93676	10.0153	2580.48	0	0
Hba-a2	1.93289	9.41422	2104.6	0	0
Tsc22d1	1.9121	10.154	3550.68	0	0
Dtx3l	1.89995	9.27922	4559.6	0	0
Mx1	1.88878	9.22471	10822.4	0	0
Rtp4	1.85299	9.32537	3679.88	0	0
Tnfsf10	1.83172	9.31506	3127.84	0	0
Samd9l	1.82519	9.48849	2711.28	0	0
Vcam1	1.82162	9.29959	3082.64	0	0
Hmox1	1.80546	9.4784	2010.11	0	0
Clec2d	1.77273	9.36777	2562.4	0	0
Stat1	1.77256	9.31075	3097.2	0	0
Cd274	1.74149	9.24145	5752.75	0	0
Znfx1	1.72416	9.29254	3028.13	0	0
Irgm2	1.72139	9.26372	4266.46	0	0
Rhob	1.71051	9.41813	1928.86	0	0
Irf1	1.67013	9.27333	3364.4	0	0
2810474O19Rik	1.60359	9.42903	1899.25	0	0
Icam1	1.57969	9.3366	2099.77	0	0
Cxcl9	1.56639	9.2247	6097.84	0	0
Tacc2	1.52975	9.44525	1749.46	0	0
Gbp5	1.58217	9.22305	7067.37	8.25089628554882e-322	4.27791680108102e-319
Zfp36l1	1.44811	9.7164	1516.5	4.58842101224006e-315	2.33575657274031e-312
Parp9	1.58468	9.25735	3674.6	1.44998e-300	7.24936e-298
Cxcl2	1.68376	9.52354	1435.72	3.47893e-299	1.70883e-296
Plk3	1.55227	9.26456	3350.7	2.29313e-294	1.10695e-291
Trim30d	1.49438	9.21552	7940.58	4.22364e-294	2.0043e-291
Irf7	1.22123	9.55964	1406.06	2.47031e-293	1.15273e-290
Ddx58	1.58942	9.26609	2953.83	1.83473e-284	8.4211e-282
Ifi204	1.55587	9.23074	4378.19	9.22679e-279	4.16664e-276
Saa3	1.60028	9.73328	1329.74	3.17755e-278	1.41214e-275
Ifih1	1.55517	9.24395	3668.36	2.44385e-274	1.06911e-271
Gm4951	1.45019	9.22693	5089.87	2.9056e-268	1.25155e-265
Ifi203	1.55307	9.2438	3127.17	9.21431e-267	3.90882e-264
Tmem140	1.40939	9.35231	1610.57	2.19365e-265	9.16682e-263
Clic4	1.38298	9.46015	1261.77	1.05555e-264	4.34606e-262
H2-Q4	1.51152	9.29314	2015.47	4.19653e-258	1.70282e-255
Slc13a1	1.37614	9.89466	1220.71	1.66091e-256	6.64316e-254
Mnda	1.41897	9.21424	6360.83	6.09215e-255	2.40237e-252
Trim12a	1.50666	9.25744	2822.74	2.97081e-253	1.15523e-250
Marcksl1	1.44547	9.38637	1190.68	1.6981e-250	6.51279e-248
Ifi35	1.43523	9.30433	1926.18	7.44289e-250	2.81603e-247
Ccl3	1.48006	9.28288	1593.09	2.0156e-246	7.52438e-244
Ifitm3	1.63036	10.1497	1153.76	4.29697e-243	1.58298e-240
Oasl2	1.39234	9.26157	2623.97	6.71182e-239	2.44049e-236
Gm4955	1.37523	9.2114	6370.63	4.43695e-238	1.59264e-235
Gbp3	1.28417	9.29434	2508.24	7.08618e-237	2.51138e-234
Rnd1	1.26524	9.25804	2845.9	5.31929e-235	1.86162e-232
Mt1	1.5698	11.3603	1110.85	1.83147e-234	6.33055e-232
Xaf1	1.35759	9.29747	2043.71	1.28239e-233	4.37859e-231
Tm4sf1	1.44942	9.34212	1103.46	5.62576e-233	1.89771e-230
Tap1	1.4008	9.2603	2698.86	8.05109e-233	2.68351e-230
Ccl5	1.80823	9.85812	1100.59	2.13864e-232	7.04444e-230
Cxcl5	1.20814	9.20649	6582.36	3.61779e-227	1.1778e-224
Gbp4	1.33567	9.22803	3588.13	2.99314e-216	9.63242e-214
Serpine1	1.24624	9.22411	3952.45	9.78621e-214	3.11357e-211
Birc3	1.36774	9.24103	2776.4	4.33949e-210	1.36513e-207
Ifi205	1.20261	9.205	6873.82	2.40956e-209	7.49588e-207
Cyp4a14	-2.61819	10.0085	972.491	1.79791e-206	5.53163e-204
Mndal	1.37307	9.23222	2817.02	6.16414e-204	1.87591e-201
F830016B08Rik	1.12893	9.21091	6393.37	5.98761e-202	1.80259e-199
Nme2	1.12694	9.52979	949.262	9.55105e-202	2.84479e-199
Gbp6.1	1.22157	9.26237	2368.76	9.18735e-201	2.70766e-198
Akap12	1.2378	9.23196	2911.06	1.102e-199	3.21394e-197
Crem	1.30036	9.29704	1539.46	4.3894e-198	1.26695e-195
Hp	1.13345	9.37783	924.046	1.3123e-196	3.74917e-194
Eif2ak2	1.34249	9.23784	2722.68	4.11718e-196	1.16437e-193
Fas	1.35775	9.24825	2311.32	9.67606e-196	2.7091e-193
Ube2l6	1.25635	9.25021	2486.38	2.02658e-195	5.61785e-193
Cyp4a10	-1.85398	9.94398	917.575	2.7419e-195	7.52624e-193
Rplp1	-0.894629	10.9551	916.619	4.29481e-195	1.16744e-192
mt-Atp8	0.890113	10.4827	915.67	6.70821e-195	1.80593e-192
Ddx60	1.16834	9.20478	7168.81	8.34124e-191	2.22417e-188
Hbb-bt	1.06129	9.27564	1501.96	6.21207e-190	1.64081e-187
Bst2	1.16039	9.52652	885.191	1.12814e-188	2.95194e-186
Gm10053	1.06126	9.56856	866.158	8.84433e-185	2.29281e-182
Phf11b	1.25952	9.21784	3656.09	2.15465e-183	5.53448e-181
Mitd1	1.29641	9.25505	1962.47	3.13165e-179	7.97091e-177
Nmi	1.25306	9.27692	1632.32	9.43043e-179	2.37868e-176
Zc3hav1	1.27989	9.27105	1641.55	4.90801e-177	1.22692e-174
Tgtp1	1.05091	9.23952	3145.51	1.81787e-175	4.50413e-173
Slfn4	1.15383	9.21371	3962.37	5.34828e-175	1.31352e-172
Tlr3	1.24912	9.22896	2730.31	2.92055e-173	7.11039e-171
Eef1a1	-0.791592	11.4273	809.77	3.26542e-173	7.88147e-171
Tifa	1.23674	9.24914	2102.21	9.97975e-172	2.38815e-169
Stat2	1.22498	9.22774	2853.3	1.04008e-170	2.46782e-168
Ms4a4c	1.19072	9.22268	2496.45	8.08602e-166	1.90246e-163
Pydc3	1.08725	9.2022	6492.73	1.19475e-164	2.78755e-162
Cd40	1.09498	9.20453	5502.4	1.28813e-163	2.98059e-161
Gadd45g	1.15803	9.68909	756.822	2.60957e-162	5.98875e-160
Gadd45a	1.1455	9.33111	965.841	1.66641e-159	3.79319e-157
Ucp2	-1.56201	9.52661	741.423	3.93439e-159	8.88347e-157
Helz2	1.13706	9.21179	3872.08	1.71396e-155	3.839e-153
Parp12	1.17119	9.23955	2115.51	4.69896e-155	1.04414e-152
Samhd1	1.10421	9.32694	1006.82	1.22206e-153	2.69411e-151
Socs1	1.14458	9.21424	3403.87	4.34658e-153	9.50747e-151
Phf11d	1.15804	9.21821	2917.59	3.80507e-151	8.25849e-149
AA467197	1.11817	9.23762	1770.75	1.08855e-148	2.34441e-146
Map3k1	1.10528	9.34592	882.33	1.62578e-148	3.4747e-146
Ifi44	1.13543	9.23822	1920.86	3.05036e-147	6.47001e-145
Psmb10	1.05963	9.35092	910.033	1.79685e-146	3.78257e-144
Lgals9	1.19297	9.2384	1780.9	9.12987e-146	1.9076e-143
Pik3r1	1.10411	9.32239	926.625	3.34278e-145	6.93268e-143
Psmb8	0.970134	9.55333	670.439	1.95113e-144	4.01675e-142
Lcn2	1.03007	10.1357	668.629	4.63426e-144	9.47081e-142
Hmgcs2	-1.90555	9.55575	798.356	1.4366e-140	2.91464e-138
Nfkbia	1.10863	9.51145	644.634	4.47402e-139	9.01176e-137
Il1rn	1.05268	9.2194	2062.41	1.70309e-138	3.40594e-136
Pyhin1	1.04903	9.20775	3570.34	9.04905e-138	1.79685e-135
Adamts1	1.13937	9.26436	1234.72	9.41799e-138	1.85694e-135
Steap4	0.875071	9.19588	6994.82	1.55652e-137	3.04752e-135
Cd47	1.0183	9.53469	635.847	3.00744e-137	5.84739e-135
Trim25	1.10779	9.30764	990.637	2.17883e-136	4.20709e-134
F3	1.14318	9.25083	1454.81	8.16408e-136	1.5656e-133
Gapdh	-0.831734	10.6925	622.199	2.08453e-134	3.97024e-132
Bcl3	1.10681	9.24026	1683.19	3.78079e-133	7.15233e-131
Csrnp1	1.07676	9.21924	2548.08	5.72637e-133	1.07602e-130
Upp1	1.11611	9.27684	1047.37	4.40815e-131	8.22796e-129
Zfp36	1.01128	9.43247	602.749	2.35538e-130	4.36728e-128
Rps2	-0.769955	10.9639	600.386	7.32911e-130	1.35e-127
Rpl13a	-0.753127	11.0491	596.833	4.03731e-129	7.38802e-127
Tor1aip2	0.985345	9.39836	667.827	6.56867e-129	1.19422e-126
Fam46a	1.06799	9.22019	2351.9	1.30472e-128	2.35675e-126
Rplp0	-0.76597	10.9749	588.357	2.37148e-127	4.25621e-125
Tra2a	1.01223	9.35742	725.505	4.46016e-124	7.95386e-122
Trim12c	1.08575	9.23358	1728.23	9.50568e-124	1.68443e-121
Rpl11	-0.722696	10.7576	564.178	2.67056e-122	4.70255e-120
Rpl28	-0.735142	10.6712	563.226	4.22428e-122	7.39196e-120
Enpp4	1.09188	9.25189	1267.4	1.79667e-121	3.12443e-119
Rpl23	-0.67928	10.8965	559.498	2.54361e-121	4.39606e-119
Gm5431	0.756765	9.19368	6666.67	1.48617e-120	2.55275e-118
Mgst1	-1.18728	9.97757	550.75	1.7215e-119	2.93894e-117
Fosl2	1.04779	9.24749	1358.32	1.88976e-119	3.20664e-117
Pnp	0.948076	9.39588	619.807	2.95487e-119	4.98377e-117
Rps8	-0.697536	10.9083	544.267	3.91914e-118	6.57055e-116
Stat3	0.984457	9.34384	704.157	6.26418e-117	1.04395e-114
Xbp1	0.896874	9.45987	532.57	1.10608e-115	1.83242e-113
Plac8	0.937107	10.0219	529.4	5.10708e-115	8.41107e-113
Fgb	0.625877	9.43339	1008.92	5.98382e-115	9.79737e-113
Psmb9	0.986791	9.27972	954.266	3.3139e-113	5.39433e-111
Pydc4	0.897425	9.20088	4254.92	7.13464e-113	1.15466e-110
Rpl19	-0.682322	10.7283	508.038	1.54835e-110	2.49142e-108
Daxx	1.02694	9.23258	1559.42	7.5627e-110	1.20995e-107
Acsl1	-1.1548	9.50981	501.698	3.32212e-109	5.28482e-107
Rps12	-0.900204	10.1711	501.332	3.96521e-109	6.2722e-107
Il1b	0.847362	9.30652	616.105	4.2292e-109	6.65219e-107
Pfkfb3	0.995469	9.23118	1484.27	6.53003e-107	1.02138e-104
Rpl18	-0.781082	10.3588	490.519	7.42309e-107	1.15462e-104
Trafd1	1.02378	9.24096	1336.84	9.14841e-107	1.41512e-104
Rpl27a	-0.68965	10.6955	486.858	4.36855e-106	6.72036e-104
Eef2	-0.786851	10.2755	483.318	2.42511e-105	3.71028e-103
Slfn2	0.993212	9.28723	713.806	5.55037e-104	8.44561e-102
Cyp4a31	-1.19291	9.69419	476.629	6.19595e-104	9.37698e-102
Fth1	-0.592153	14.2075	475.552	1.04399e-103	1.57148e-101
Ftl1	-0.698697	13.3174	474.265	1.94813e-103	2.91678e-101
Slco1a1	0.815272	9.38594	472.301	2.46555e-102	3.67184e-100
Birc2	0.97814	9.30679	710.326	1.90038e-101	2.81518e-99
Rpsa	-0.836024	10.2149	462.121	7.02778e-101	1.0356e-98
Rpl29	-0.738044	10.3757	460.726	1.38258e-100	2.02667e-98
Rpl21	-0.667758	10.7161	458.134	4.86195e-100	7.08984e-98
Arid5a	0.891704	9.2072	2749.25	1.49537e-99	2.16929e-97
Rpl8	-0.689217	10.5688	454.742	2.52128e-99	3.6387e-97
Errfi1	0.796888	10.2302	449.98	2.54409e-98	3.65278e-96
Cks2	-1.11271	9.52819	448.535	5.13253e-98	7.33166e-96
Tap2	0.945932	9.25428	1046.1	6.75075e-97	9.5943e-95
Comt	-0.939152	9.95294	442.531	9.4768e-97	1.34006e-94
Acaa1b	-1.38984	9.81537	442.462	9.79861e-97	1.3786e-94
Uap1	0.882083	9.36936	531.012	1.03941e-96	1.45507e-94
B4galt5	0.934233	9.30298	697.003	1.57907e-96	2.19954e-94
Rpl10	-0.687082	10.9774	441.213	1.79771e-96	2.4917e-94
Ptms	-0.899118	9.82709	440.046	3.17e-96	4.3721e-94
Osmr	0.763796	9.20231	3559.04	4.67116e-96	6.41094e-94
Cotl1	-1.1942	9.53415	438.345	7.24534e-96	9.89537e-94
Tnfaip3	0.877215	9.22543	1556.99	2.09708e-95	2.85019e-93
Slc43a2	-1.19818	9.42414	507.147	1.02065e-94	1.38049e-92
Oas1a	0.854926	9.20999	2292.36	5.78598e-94	7.78827e-92
Gpd1	-1.17678	9.54363	443.565	6.5012e-93	8.70912e-91
G3bp2	0.847893	9.39195	474.913	1.07088e-92	1.42773e-90
Selenbp1	-0.943658	9.74961	419.979	5.47675e-92	7.26721e-90
Bhlhe40	0.856437	9.36728	475.97	6.27574e-92	8.28812e-90
Rps15	-0.633063	10.6263	418.439	1.15861e-91	1.52295e-89
Psap	-0.855467	10.3648	417.381	1.93897e-91	2.53679e-89
Rps10	-0.73558	10.2975	416.518	2.95204e-91	3.84425e-89
Snx10	0.838917	9.28414	866.871	1.19001e-90	1.54249e-88
Eif4ebp3	0.733652	9.21602	1932.46	1.78648e-90	2.30497e-88
Rpl30	-0.802495	10.0455	411.886	2.81343e-90	3.61332e-88
Mif	-0.714799	10.704	409.87	7.50983e-90	9.60093e-88
H3f3b	0.63949	10.5834	409.347	9.68949e-90	1.23312e-87
Nfkbiz	0.893906	9.276	766.655	2.35857e-89	2.98802e-87
Gnas	-0.879445	9.85555	405.998	4.95171e-89	6.24496e-87
Camp	0.725265	9.21963	1305.06	7.2862e-89	9.14793e-87
Fndc3a	0.906359	9.30779	636.458	1.04288e-88	1.30351e-86
Ppargc1a	-1.18567	9.41882	473.175	2.08826e-88	2.59854e-86
Nudt4	-1.20604	9.74985	402.951	2.18414e-88	2.70582e-86
Rpl12	-0.885335	9.91139	402.929	2.20846e-88	2.7239e-86
Tapbp	0.754929	9.47115	402.154	3.22101e-88	3.95534e-86
Acot1	-1.13106	9.4101	490.218	3.7648e-88	4.60292e-86
Maf	-1.08552	10.0271	401.433	4.57693e-88	5.57152e-86
Rps4x	-0.711191	10.5769	401.072	5.45805e-88	6.61535e-86
Rplp2	-0.623673	10.6804	400.381	7.6419e-88	9.22233e-86
Maff	0.746116	9.2105	2234.16	1.03714e-87	1.24626e-85
Eno1	-0.848861	9.87352	398.968	1.52148e-87	1.82044e-85
Rpl10a	-0.705788	10.351	398.592	1.82721e-87	2.17694e-85
Rps24	-0.649921	10.6654	398.153	2.26338e-87	2.68518e-85
Aldoa	-0.755991	10.2217	397.032	3.90972e-87	4.61874e-85
Rpl31	-0.634258	10.4759	395.537	8.10235e-87	9.53149e-85
Fau	-0.592234	10.9674	394.185	1.56635e-86	1.83493e-84
Rps16	-0.607119	10.8345	391.268	6.49261e-86	7.57417e-84
Il15	0.884327	9.25688	894.14	1.0667e-85	1.23923e-83
Dhx58	0.730566	9.1979	3737.45	2.60102e-85	3.00923e-83
Slc7a13	0.77281	9.53282	387.649	3.79304e-85	4.37027e-83
Pim1	0.915663	9.28282	617.157	4.68267e-85	5.37317e-83
Id2	-0.826897	10.3777	386.261	7.46595e-85	8.53191e-83
Ch25h	0.715459	9.20019	3268.41	1.03444e-84	1.17733e-82
Steap2	0.811454	9.44913	382.671	4.3045e-84	4.87925e-82
Inhbb	0.680519	9.19417	4972.5	3.6632e-83	4.13557e-81
Xdh	0.829338	9.2633	892.569	4.59415e-83	5.16574e-81
Rrbp1	0.765537	9.46329	375.92	1.16135e-82	1.30062e-80
Sox9	0.735684	9.23197	1299.66	2.35108e-82	2.62254e-80
Wfdc17	0.904847	9.79277	371.164	1.18436e-81	1.31586e-79
Marcks	0.892385	9.2579	701.647	1.63147e-81	1.80545e-79
Etv6	0.893202	9.23509	1076.52	1.77233e-81	1.95361e-79
Tlr2	0.769048	9.2016	2726.34	3.0568e-81	3.35624e-79
Ccno	0.561565	9.19002	6783.11	9.83617e-81	1.07575e-78
Olfr56	0.595768	9.19195	5540.35	8.21598e-80	8.95063e-78
Nlrc5	0.728497	9.20278	2645.65	9.2948e-80	1.00867e-77
Dusp1	0.880204	9.68086	361.906	1.091e-79	1.17938e-77
Zbp1	0.73427	9.26562	825.108	1.20215e-79	1.29453e-77
Sptlc2	0.853675	9.32519	525.484	1.3369e-79	1.43411e-77
Plat	0.8519	9.21805	1352.96	1.70375e-79	1.82067e-77
Sostdc1	-1.43843	9.47462	357.371	1.00161e-78	1.06628e-76
Il6	0.585361	9.19074	6334.31	2.69237e-78	2.85534e-76
Atp1a1	-0.822573	10.9162	353.654	6.16823e-78	6.51691e-76
Pml	0.851585	9.22445	1216.04	5.9044e-77	6.21471e-75
Fam13a	-1.24038	9.35136	514.416	6.7157e-77	7.04218e-75
Rpl7a	-0.704506	10.0928	347.972	9.93551e-77	1.03796e-74
U90926	0.484246	9.18761	5724.46	1.10963e-76	1.15492e-74
Gabarapl1	-0.833986	9.99722	343.704	8.01882e-76	8.31522e-74
Slc15a3	0.72462	9.20014	2782.79	1.02299e-75	1.05689e-73
Cep85	0.857704	9.28142	625.967	1.64536e-75	1.69363e-73
Rpl17	-0.586799	10.7898	341.634	2.20925e-75	2.26574e-73
Rps3	-0.605989	10.5508	341.611	2.23409e-75	2.28284e-73
Neat1	0.72542	10.4729	340.271	4.3049e-75	4.38286e-73
Cd200	0.857661	9.37857	339.437	6.47809e-75	6.57151e-73
Cxxc5	-1.07022	9.37559	476.143	8.87272e-75	8.96817e-73
Calr	-0.817378	9.94744	338.515	1.01701e-74	1.02425e-72
Atp11a	0.787083	9.62167	338.17	1.20451e-74	1.20874e-72
Emx1	-1.09252	9.31987	507.082	1.46163e-74	1.46153e-72
Slc25a4	-0.844606	9.85738	334.149	8.62915e-74	8.59783e-72
Uba52	0.510806	10.5057	333.432	1.22587e-73	1.21709e-71
Sdc4	0.694039	9.97079	331.071	3.89757e-73	3.85597e-71
Rps13	-0.619944	10.4534	328.984	1.08384e-72	1.0685e-70
Trim56	0.854569	9.23844	900.326	2.09081e-72	2.0479e-70
Rpl32	-0.516683	11.2234	327.642	2.09193e-72	2.0479e-70
Crot	0.759415	9.54229	327.494	2.2488e-72	2.1938e-70
Aes	-0.834425	9.81439	325.607	5.67075e-72	5.51284e-70
Casp4	0.721024	9.20207	2291.16	1.1762e-71	1.13949e-69
Nt5c3	0.801865	9.32918	467.141	2.06935e-71	1.99785e-69
Ech1	-0.763629	9.86755	322.538	2.55332e-71	2.45663e-69
Adar	0.816973	9.22342	1139.75	3.51641e-71	3.37166e-69
Cd14	0.675299	9.31277	487.256	4.72868e-71	4.51856e-69
Rpl4	-0.663839	10.2897	318.149	2.19626e-70	2.09152e-68
Gnb2l1	-0.760217	9.84434	318.124	2.22279e-70	2.10962e-68
Socs2	0.827051	9.27946	559.948	2.47274e-70	2.33891e-68
Neu1	-0.950918	9.66599	317.361	3.23218e-70	3.04696e-68
Rcan1	0.779443	9.32792	438.844	4.97393e-70	4.67316e-68
Btg2	0.774127	9.36883	316.401	5.1768e-70	4.84749e-68
Prss8	-0.94	9.51441	329.371	7.93732e-70	7.40763e-68
Acadvl	-0.889134	9.49978	335.669	1.29127e-69	1.2011e-67
Rnf19b	0.820126	9.23202	943.871	1.39611e-69	1.29431e-67
Zfp503	-1.01378	9.38423	414.667	1.55324e-69	1.43523e-67
Rpl14	-0.53907	10.7385	312.801	3.02613e-69	2.78703e-67
Tns1	-0.804279	9.94791	310.455	9.56826e-69	8.78335e-67
Eif3f	-0.827042	9.65825	309.721	1.37204e-68	1.25537e-66
Rps21	-0.571253	10.4084	309.644	1.42507e-68	1.29964e-66
Litaf	0.786241	9.32292	427.783	1.8298e-68	1.66334e-66
Ogfr	0.830009	9.25732	696.074	2.4082e-68	2.18203e-66
Psme2	0.699994	9.50495	308.259	2.81195e-68	2.53965e-66
Rps23	-0.500193	11.1047	307.866	3.40922e-68	3.06917e-66
Irf2	0.830885	9.26272	648.369	6.76814e-68	6.07354e-66
Chchd2	-0.452987	11.2558	304.808	1.53007e-67	1.36866e-65
Atf3	0.649543	9.20846	1746.17	3.90782e-67	3.48443e-65
Rpl26	-0.478774	10.9832	300.673	1.16545e-66	1.03588e-64
Rps19	-0.476548	11.4279	296.448	9.28437e-66	8.22607e-64
Rps3a1	-0.578609	10.5538	295.383	1.5665e-65	1.38356e-63
Cox4i1	-0.38226	11.5489	293.488	3.97455e-65	3.49935e-63
Atp5g2	-0.584958	10.2137	292.947	5.18522e-65	4.55097e-63
Elf1	0.783385	9.30208	462.5	9.77804e-65	8.55517e-63
Misp	0.717914	9.21847	1172.4	1.25769e-64	1.09698e-62
Alpl	-1.02908	9.46419	325.138	2.10444e-64	1.82982e-62
Efhd1	-0.992541	9.35302	345.553	2.24174e-64	1.94317e-62
Cox7a2l	-0.732987	9.78408	289	3.60879e-64	3.11849e-62
Rps7	-0.582141	10.5458	288.763	4.05441e-64	3.49278e-62
Rps11	-0.525125	10.7408	288.402	4.84258e-64	4.15898e-62
Rps18	-0.486499	11.103	287.623	7.10071e-64	6.07969e-62
mt-Nd4l	0.560269	10.7859	286.297	1.36291e-63	1.16337e-61
Rpl18a	-0.4893	11.1214	285.212	2.32323e-63	1.97708e-61
Samsn1	0.752694	9.23971	716.891	4.5373e-63	3.84956e-61
Pdzk1ip1	-0.668951	10.4955	283.796	4.66215e-63	3.94353e-61
Clic5	0.78518	9.28081	524.654	5.152e-63	4.34475e-61
Gnb2	-0.792418	9.57105	283.215	6.20328e-63	5.2156e-61
Vwa5a	0.775511	9.26027	621.423	1.31241e-62	1.10014e-60
Arrdc3	-0.923414	9.36569	363.92	1.82154e-62	1.52237e-60
mt-Atp6	0.480998	15.333	280.405	2.47184e-62	2.05972e-60
Ctsd	-0.818013	9.75491	280.308	2.59224e-62	2.15364e-60
Kcnk5	0.671773	9.38416	319.358	2.7056e-62	2.24117e-60
Pnrc1	0.676303	9.48926	279.998	3.01857e-62	2.49303e-60
Parp10	0.77764	9.25132	682.032	3.56983e-62	2.93965e-60
Mlkl	0.543534	9.19565	3222.41	5.27748e-62	4.3331e-60
Tmem52b	-1.20899	9.71846	278.362	6.75158e-62	5.52721e-60
Trib1	0.78602	9.24035	717.294	8.98105e-62	7.33095e-60
Tor1aip1	0.722848	9.36127	350.491	1.53575e-61	1.24994e-59
Mafb	0.727515	9.21909	1023.03	2.8243e-61	2.29202e-59
Gm20186	0.699878	9.21719	1010.24	3.80288e-61	3.07725e-59
Mxd1	0.759369	9.22317	944.085	4.38873e-61	3.54108e-59
Atp5d	-0.511676	10.453	273.389	7.80139e-61	6.27653e-59
Usp25	0.786905	9.27672	511.705	8.99768e-61	7.21825e-59
Csf1	0.629414	9.21473	1278.84	9.86332e-61	7.89009e-59
Tomm20	-0.643804	9.98405	272.165	1.42511e-60	1.13676e-58
Zufsp	0.708897	9.20913	1403.75	2.73317e-60	2.17396e-58
AI607873	0.648136	9.20103	1971.76	3.07747e-60	2.44088e-58
Rps9	-0.51788	10.6929	269.947	4.2473e-60	3.3592e-58
Mkrn1	0.654986	9.41243	269.078	6.51483e-60	5.13809e-58
Reg3g	0.464906	9.19478	2430.19	8.30252e-60	6.5296e-58
Gbp9	0.589597	9.20006	2204.9	9.03648e-60	7.08693e-58
Noct	0.674865	9.28079	580.956	9.96593e-60	7.79402e-58
Apol9b	0.559054	9.19273	3730.77	1.80625e-59	1.40867e-57
Sp100	0.766527	9.2329	731.708	4.30452e-59	3.34772e-57
Chmp4b	0.661961	9.51069	265.076	4.67618e-59	3.62669e-57
Nr2f2	-0.931067	9.40338	338.553	4.7207e-59	3.65111e-57
Rpl22	-0.63685	10.0411	264.366	6.63275e-59	5.1158e-57
2020-03-05	0.662195	9.42977	281.156	7.72236e-59	5.93985e-57
Rbm3	-0.7329	9.79505	263.837	8.6097e-59	6.60423e-57
Asap3	0.618906	9.19937	2095.86	1.16904e-58	8.94285e-57
Rpl13	-0.474354	11.2242	262.885	1.37587e-58	1.04963e-56
1700011H14Rik	-0.820878	9.53307	262.105	2.0206e-58	1.5373e-56
Rpl39	-0.483685	10.9172	261.984	2.14488e-58	1.62743e-56
Plscr1	0.745305	9.31881	372.151	2.71233e-58	2.05243e-56
Aprt	-0.81012	9.48949	278.472	3.64446e-58	2.75034e-56
Map3k8	0.673504	9.20634	1477.08	5.53979e-58	4.16944e-56
Erp29	-0.840437	9.4472	297.074	6.56515e-58	4.92791e-56
Eef1b2	-0.737609	9.65808	258.53	1.17623e-57	8.80534e-56
Socs3	0.710922	9.23553	711.88	1.23269e-57	9.20341e-56
Ypel3	-0.783259	9.48824	274.484	1.26158e-57	9.39404e-56
Gm13822	0.632587	9.19995	1976.13	2.20914e-57	1.64062e-55
Ppp1r1a	-1.18448	9.77197	256.429	3.31301e-57	2.45391e-55
Atox1	-0.488082	10.669	255.454	5.35734e-57	3.95765e-55
Hist2h2aa1	0.689301	9.32012	365.075	1.07342e-56	7.90887e-55
Cox6a1	-0.41042	11.154	253.616	1.32596e-56	9.74391e-55
Ndufb9	-0.488422	10.4818	252.852	1.93268e-56	1.41653e-54
Nupr1	0.653133	9.29173	365.566	2.15241e-56	1.57345e-54
Rabac1	-0.724225	9.65914	251.245	4.26778e-56	3.1117e-54
Tpt1	-0.447176	11.419	251.064	4.66746e-56	3.39427e-54
Trim21	0.576477	9.19528	2594.72	1.04992e-55	7.61545e-54
Gpi1	-0.779517	9.55203	256.356	1.19807e-55	8.66762e-54
Tnfaip8	-0.96893	9.637	248.543	1.61791e-55	1.16748e-53
Cnn3	0.64324	9.56194	248.345	1.78428e-55	1.28422e-53
Chka	0.647878	9.46892	247.593	2.58483e-55	1.85564e-53
Pfn1	-0.624625	10.5589	247.043	3.39048e-55	2.42779e-53
Cyp2e1	0.695537	10.0591	246.098	5.40593e-55	3.8611e-53
Rps17	-0.448304	10.7755	246.006	5.65712e-55	4.03023e-53
Slfn5	0.532362	9.19277	3293.93	5.84928e-55	4.15655e-53
Rps14	-0.401623	11.2329	245.788	6.29808e-55	4.46414e-53
Fgl2	0.632272	9.20461	1303.54	1.20157e-54	8.49533e-53
Ckb	-0.919208	9.37919	243.363	2.08388e-54	1.46963e-52
Batf2	0.478151	9.18981	4998.3	2.26927e-54	1.59636e-52
Rhoc	0.651334	9.44127	242.909	2.60739e-54	1.82961e-52
Tmem14c	-0.784304	9.51683	261.355	3.43539e-54	2.4046e-52
Rps26	-0.522065	10.4592	242.332	3.46651e-54	2.42034e-52
Rpl9	-0.489648	10.6508	241.875	4.34318e-54	3.02489e-52
Actg1	-0.648186	10.381	240.589	8.19157e-54	5.69101e-52
Rpl3	-0.550193	10.422	239.631	1.31461e-53	9.11052e-52
Igfbp7	-0.57977	10.5686	237.944	3.02322e-53	2.08998e-51
S1pr1	0.656354	9.21761	915.575	6.25176e-53	4.31125e-51
Srgn	0.741737	9.40046	236.12	7.44225e-53	5.11961e-51
Sp110	0.688116	9.21742	911.811	7.67912e-53	5.26961e-51
Wnk1	-1.03181	9.83215	236.049	7.70444e-53	5.27405e-51
Psmb5	-0.698979	9.59994	235.933	8.16126e-53	5.57314e-51
Apol9a	0.501193	9.1911	3880.48	1.33117e-52	9.06812e-51
Stard10	-0.752683	9.74157	233.365	2.90101e-52	1.97142e-50
Wfdc2	-0.92731	9.77116	233.14	3.24159e-52	2.19753e-50
Rpl36	-0.408398	10.9522	233.004	3.46656e-52	2.34436e-50
Rps20	-0.509287	10.472	232.886	3.67459e-52	2.47907e-50
Tgtp2	0.466756	9.20764	1633.63	4.71538e-52	3.17359e-50
Esd	-0.616092	9.88345	232.15	5.28658e-52	3.54949e-50
Prelid1	-0.700121	9.69759	231.566	7.05336e-52	4.7244e-50
Eef1g	-0.668024	9.74994	230.411	1.248e-51	8.33924e-50
Cstb	-0.630376	9.926	229.7	1.77319e-51	1.18204e-49
Rpl35a	-0.416534	11.0701	229.551	1.90865e-51	1.26932e-49
Serf2	-0.385073	10.881	227.444	5.4047e-51	3.5858e-49
Hnf4a	-0.836197	9.56189	227.124	6.33296e-51	4.19173e-49
Cyfip2	-0.861756	9.39449	264.669	6.79396e-51	4.48625e-49
Hdc	0.623139	9.20701	1228.02	7.63731e-51	5.03128e-49
Mmp13	0.33634	9.18778	2998.46	8.74885e-51	5.75001e-49
Cflar	0.585921	9.56949	226.328	9.38399e-51	6.153e-49
Gm2a	-0.800372	9.61314	225.218	1.62384e-50	1.06225e-48
Ap2m1	-0.674947	9.56776	225.199	1.63964e-50	1.07008e-48
Crip2	-0.871302	9.29908	338.67	1.94198e-50	1.26445e-48
Pgls	-0.717307	9.51034	237.598	2.14143e-50	1.39108e-48
Rhobtb1	-0.957896	9.31542	391.888	2.6091e-50	1.69096e-48
Ctsl	-0.71085	9.85116	223.89	3.13163e-50	2.02493e-48
Slc5a3	-0.892389	9.43352	223.86	3.1777e-50	2.04998e-48
Sgms2	0.657346	9.43859	223.247	4.30304e-50	2.76957e-48
Rps15a	-0.495007	10.6916	223.04	4.76744e-50	3.06144e-48
Tbrg1	0.687984	9.31334	332.673	4.9972e-50	3.20164e-48
Mrps6	-0.859102	9.49607	222.813	5.33329e-50	3.40916e-48
Fam134b	0.596471	9.5444	222.128	7.48049e-50	4.77081e-48
Cyp2d26	-1.04265	9.42488	251.745	8.23065e-50	5.23731e-48
Pkm	-0.88487	9.57874	221.751	9.01426e-50	5.72293e-48
Acadl	-0.710981	9.49419	227.427	9.32937e-50	5.90959e-48
Jmjd1c	0.687301	9.30534	355.007	9.69578e-50	6.12782e-48
Chchd10	-0.440438	11.1108	221.435	1.0539e-49	6.64573e-48
Cndp2	0.616328	10.0599	219.963	2.18175e-49	1.37269e-47
Rpl7	-0.524907	10.2561	219.028	3.46578e-49	2.17567e-47
Atp5b	-0.432439	10.7724	218.977	3.55297e-49	2.22541e-47
Aldob	-0.639027	11.4863	218.427	4.66456e-49	2.91514e-47
Gm4841	0.316908	9.20609	1722.34	4.73373e-49	2.95178e-47
Calm1	-0.698913	9.84059	218.242	5.11032e-49	3.17953e-47
Ptpn1	0.664716	9.29554	353.81	7.55433e-49	4.68972e-47
Polr2i	-0.676123	9.54237	217.438	7.60619e-49	4.71146e-47
Cluh	-0.833296	9.38056	296.389	1.78173e-48	1.10121e-46
Wnk4	-0.854388	9.38325	249.215	3.15368e-48	1.94486e-46
Tubb5	-0.802857	9.35784	240.373	3.41238e-48	2.09978e-46
Ccrl2	0.637656	9.21131	998.989	4.94066e-48	3.03352e-46
Ppib	-0.675105	9.59472	213.618	5.03304e-48	3.08348e-46
Rpl24	-0.408984	10.7882	212.614	8.27288e-48	5.05729e-46
Zcchc2	0.638009	9.21451	920.086	1.30044e-47	7.93238e-46
Acaa2	-0.752513	9.53152	214.157	1.34051e-47	8.15903e-46
Relb	0.636179	9.21471	904.112	1.52696e-47	9.27371e-46
Slc25a3	-0.502816	10.2647	210.417	2.45322e-47	1.48669e-45
Smim5	-0.816908	9.27396	387.712	2.80509e-47	1.69626e-45
Arhgap8	0.505343	9.19463	2304.27	3.33503e-47	2.01237e-45
Fbxw17	0.643065	9.2182	824.547	3.40323e-47	2.04911e-45
Dcp2	0.701229	9.24692	517.681	3.50753e-47	2.10738e-45
Slc5a10	-0.906868	9.33773	313.619	3.64257e-47	2.18383e-45
Tpi1	-0.576219	9.97363	209.272	4.32443e-47	2.58708e-45
Rps29	-0.337521	11.7662	208.202	7.34437e-47	4.38438e-45
Ankrd1	0.436605	9.19708	1795.56	1.00488e-46	5.98608e-45
Sgk1	-0.830562	9.61777	207.417	1.08343e-46	6.44029e-45
Junb	0.681959	9.56268	206.487	1.71688e-46	1.01841e-44
Snhg20	-0.839423	9.29865	379.07	1.93871e-46	1.14757e-44
Sp140	0.537077	9.19772	1808.14	2.34151e-46	1.38307e-44
Acot2	-0.793385	9.36308	261.053	2.51555e-46	1.48274e-44
Pank1	0.579969	9.57028	205.363	2.99532e-46	1.76182e-44
Taf10	-0.883418	9.36619	306.969	3.96012e-46	2.32443e-44
Klf15	-0.989437	9.30458	397.271	6.94337e-46	4.06695e-44
Gcnt2	0.674135	9.3051	319.379	7.36082e-46	4.30247e-44
Cml1	-0.905498	9.93015	203.472	7.63917e-46	4.45586e-44
Psme2b	0.567037	9.23066	715.666	1.25177e-45	7.28629e-44
Hivep2	0.630063	9.22595	678.633	1.50018e-45	8.71409e-44
Hnf1b	-0.839741	9.33869	316.775	1.62777e-45	9.43569e-44
Tnip3	0.486552	9.20095	1424.85	1.76027e-45	1.01826e-43
Cox8a	-0.328536	11.6507	201.125	2.44256e-45	1.41003e-43
Hint1	-0.446458	10.6684	200.742	2.95295e-45	1.70116e-43
Ccdc141	-0.926814	9.33183	321.773	3.11986e-45	1.79363e-43
Krt7	-0.785933	9.33918	232.526	3.44617e-45	1.97717e-43
Fam26f	0.470314	9.19253	2601.92	3.61635e-45	2.07056e-43
Glud1	-0.651232	9.66467	199.731	4.8736e-45	2.78472e-43
Gm10804	-0.912345	9.34942	304.251	5.59643e-45	3.19122e-43
Adgrg1	-0.796998	9.38203	241.566	6.72063e-45	3.82448e-43
Ube2m	-0.777619	9.40888	256.482	8.10594e-45	4.60345e-43
Rpl38	-0.375273	10.9739	198.262	1.00911e-44	5.71925e-43
Tmem238	-0.669951	9.4947	203.75	1.15172e-44	6.51431e-43
Csf3	0.336473	9.18735	2935.44	1.24851e-44	7.04755e-43
Slc30a5	0.660846	9.27924	362.785	1.70153e-44	9.58542e-43
Taldo1	-0.653489	9.56641	197.089	1.80455e-44	1.01453e-42
0610031O16Rik	0.589472	9.21257	867.576	2.02463e-44	1.13599e-42
Agpat3	-0.737823	9.47636	222.918	2.73771e-44	1.53301e-42
AW112010	0.659784	9.91234	195.971	3.13951e-44	1.75449e-42
Wdr89	-0.643516	9.55561	195.479	4.00765e-44	2.23518e-42
Cldn8	-0.816177	9.33638	238.146	4.52906e-44	2.52097e-42
Cxcl16	0.630769	9.3436	238.468	5.74417e-44	3.19098e-42
Camk2d	0.639292	9.34548	255.829	5.7897e-44	3.2099e-42
Cldn10	-0.724649	9.80904	194.608	6.17226e-44	3.41524e-42
Mgst3	-0.634164	9.68597	194.341	7.04457e-44	3.89022e-42
Mal	-0.830395	9.46856	194.302	7.18321e-44	3.95599e-42
Id3	0.584984	9.51121	194.299	7.19194e-44	3.95599e-42
Rps28	-0.405297	10.8493	194.072	8.04859e-44	4.41852e-42
Mat2a	0.563532	9.98328	194.04	8.17892e-44	4.48128e-42
Hsf2bp	0.616698	9.23079	581.564	8.20584e-44	4.48725e-42
Eci1	-0.720504	9.47161	215.39	9.79931e-44	5.34817e-42
Etfb	-0.507496	10.2602	193.452	1.09438e-43	5.96117e-42
Slc22a8	-0.83694	9.49293	193.058	1.33026e-43	7.23197e-42
0610012G03Rik	-0.601852	9.67825	192.592	1.67649e-43	9.09658e-42
Aida	0.662785	9.24055	503.241	2.20525e-43	1.19424e-41
Trim26	0.651215	9.23537	551.089	2.62656e-43	1.41966e-41
Atp5g1	-0.38848	10.9966	191.618	2.71721e-43	1.46583e-41
Aldh8a1	-0.721101	9.46556	203.163	2.95095e-43	1.58886e-41
Cox5a	-0.41444	10.5684	190.528	4.66376e-43	2.50625e-41
Ppa1	0.628457	9.27967	358.247	4.70575e-43	2.52398e-41
Tbk1	0.664523	9.24065	501.209	5.06825e-43	2.71321e-41
Trim34a	0.587267	9.20884	983.959	5.78554e-43	3.09129e-41
Wfdc21	0.327328	9.47321	189.936	6.25679e-43	3.33672e-41
P4hb	-0.692348	9.56041	189.849	6.52994e-43	3.47577e-41
Tfcp2l1	-0.728156	9.52486	189.579	7.46815e-43	3.96762e-41
0610043K17Rik	0.593806	9.2098	940.621	8.8704e-43	4.70367e-41
Slc22a12	-0.740474	10.1156	189.166	9.16492e-43	4.85065e-41
Pebp1	-0.512767	10.0665	188.814	1.09125e-42	5.76471e-41
Pth1r	-0.643864	9.916	188.523	1.26094e-42	6.64854e-41
Cdh5	0.604476	9.21357	789.808	1.37406e-42	7.23138e-41
Plekhg3	-0.81914	9.28141	393.372	1.53451e-42	8.06065e-41
Gpx4	-0.402716	11.2438	188.093	1.56041e-42	8.18134e-41
Rps6	-0.462926	10.6312	187.966	1.66155e-42	8.69534e-41
Abcg2	-0.69213	9.66138	187.71	1.88639e-42	9.85358e-41
Trim6	0.41754	9.18979	3532.74	2.06372e-42	1.07598e-40
Rpl34	-0.42033	10.662	187.513	2.08056e-42	1.08274e-40
Pnpt1	0.630467	9.2237	658.224	2.32466e-42	1.20753e-40
2300009A05Rik	-0.734492	9.46575	215.615	2.66657e-42	1.38257e-40
Pdk4	0.522997	9.36907	217.321	3.05767e-42	1.58242e-40
Plpp3	0.659133	9.28972	284.079	3.53071e-42	1.82385e-40
Cyb5a	0.453506	10.8254	186.43	3.56045e-42	1.83583e-40
Aktip	-0.740037	9.39654	230.279	4.36445e-42	2.24625e-40
Ppp1ca	-0.597194	9.65646	185.99	4.42762e-42	2.27458e-40
Ppia	-0.39733	10.8421	185.893	4.64783e-42	2.38333e-40
Pgam1	-0.611151	9.67937	185.83	4.79414e-42	2.45386e-40
2610528J11Rik	-0.821985	9.40568	245.943	5.14879e-42	2.63058e-40
Lamp1	-0.515123	10.0987	185.169	6.65538e-42	3.39412e-40
Tacstd2	0.61774	9.30536	224.317	6.89895e-42	3.51194e-40
Ssr4	-0.594262	9.6256	185.05	7.05955e-42	3.58717e-40
9930111J21Rik2	0.485558	9.19435	2023.75	7.76697e-42	3.93948e-40
Ccnl1	0.600721	9.34886	242.629	1.10823e-41	5.61087e-40
Fcgrt	-0.684922	9.46639	203.179	1.32088e-41	6.67543e-40
Cdk2ap2	-0.646954	9.50999	183.648	1.41571e-41	7.1418e-40
BC004004	-0.663235	9.49665	199.323	1.66735e-41	8.39611e-40
Cyc1	-0.533618	9.93396	183.083	1.87386e-41	9.4191e-40
Sik1	0.617691	9.22452	611.96	4.30735e-41	2.16124e-39
Rpl37	-0.342699	11.2638	180.974	5.33431e-41	2.67174e-39
Gngt2	-0.930802	9.34921	214.542	6.17685e-41	3.0882e-39
Gas6	-0.69877	9.55305	184.847	7.42999e-41	3.70373e-39
Phf11a	0.383702	9.18872	4041.06	7.43445e-41	3.70373e-39
Slc25a5	-0.414836	10.7037	179.911	9.04093e-41	4.49606e-39
Cd63	-0.435827	10.7512	179.397	1.1674e-40	5.79518e-39
Pcyt2	-0.898675	9.46349	228.491	1.55042e-40	7.68295e-39
Umod	-0.986553	10.909	178.608	1.72675e-40	8.54163e-39
Pnisr	-0.742225	9.5036	186.452	2.53359e-40	1.25107e-38
Ngp	0.316098	9.34687	177.999	2.56524e-40	1.26446e-38
Tprkb	-0.863795	9.42799	222.58	3.69065e-40	1.81601e-38
Hamp	0.308756	9.18625	3348.98	4.19276e-40	2.05945e-38
Clcnkb	-0.746772	9.39089	176.817	4.20141e-40	2.06009e-38
Acox1	0.51682	9.98078	176.143	5.8722e-40	2.8743e-38
Vmp1	0.546961	9.51241	175.745	7.1535e-40	3.49535e-38
Fkbp8	-0.670944	9.48577	197.886	7.64772e-40	3.73033e-38
Rps27a	-0.402768	10.9071	175.583	7.75397e-40	3.77558e-38
Arhgdib	-0.844409	9.35392	187.271	7.92613e-40	3.8527e-38
Glis2	-0.788813	9.28114	365.001	8.22419e-40	3.99066e-38
Slc7a8	-0.806287	9.38752	211.098	8.9199e-40	4.32075e-38
Rilpl2	-0.792522	9.29611	330.344	9.01299e-40	4.3583e-38
Klhdc7a	-0.753415	9.26443	408.426	9.71724e-40	4.69075e-38
Plaur	0.558362	9.25362	379.726	1.12298e-39	5.41159e-38
Ak2	-0.617397	9.5104	174.479	1.34193e-39	6.45555e-38
Bag1	-0.568899	9.75873	174.347	1.43271e-39	6.88043e-38
Ppp1r14b	-0.760423	9.32339	280.248	1.77643e-39	8.51651e-38
Gzmb	0.372273	9.29732	225.639	1.89171e-39	9.05367e-38
Zbtb16	0.510072	9.20261	1133.15	1.95314e-39	9.33176e-38
Tfap2b	-0.76527	9.27252	336.291	2.14536e-39	1.02327e-37
Ttc39b	0.591229	9.21861	670.694	2.50196e-39	1.19132e-37
Car12	-1.00922	9.47776	180.201	2.55607e-39	1.21502e-37
Psmd3	-0.729492	9.38873	231.858	3.04329e-39	1.44417e-37
Gpx3	-0.535791	14.4511	172.802	3.08625e-39	1.46208e-37
Rps5	-0.406244	10.8094	172.732	3.19442e-39	1.51076e-37
Kcnj1	-0.818765	9.43718	172.481	3.61843e-39	1.70841e-37
Cyhr1	-0.770004	9.35426	256.843	5.53429e-39	2.60857e-37
Cox5b	-0.361796	10.8214	170.891	7.97267e-39	3.75158e-37
Slc25a11	-0.787696	9.42475	228.877	8.09476e-39	3.80264e-37
Atp6v0e	-0.535796	9.89453	170.375	1.0306e-38	4.8333e-37
Nfil3	0.579843	9.22253	610.626	1.0371e-38	4.85563e-37
Irg1	0.472349	9.201	1046.24	1.30243e-38	6.08773e-37
Hadha	-0.727185	9.41982	212.383	1.41546e-38	6.60503e-37
Arhgap24	-0.891518	9.36736	248.991	1.45701e-38	6.78757e-37
Chmp6	-0.748535	9.39147	228.312	1.50046e-38	6.97839e-37
Hsp90ab1	-0.498426	10.096	169.552	1.55078e-38	7.20045e-37
Folr1	-0.639536	9.75877	169.389	1.68199e-38	7.79675e-37
Mif4gd	-0.720284	9.35571	236.366	2.75456e-38	1.27475e-36
Cbr1	-0.770147	9.31419	288.092	2.76592e-38	1.27789e-36
Hcfc1r1	-0.627501	9.49897	173.229	4.57194e-38	2.10882e-36
Gdap10	0.572844	9.22423	579.543	4.74245e-38	2.18387e-36
Rasip1	0.523678	9.20955	850.797	5.25807e-38	2.41733e-36
Rpl36a	-0.438055	10.3623	166.889	5.82476e-38	2.67347e-36
Gna13	0.559325	9.38014	200.108	6.94597e-38	3.18287e-36
Eif3h	-0.602187	9.57982	166.186	8.26261e-38	3.78001e-36
Pdzk1	-0.683012	9.98835	166.127	8.50776e-38	3.88581e-36
Pde4b	0.594106	9.21981	610.189	9.9803e-38	4.55095e-36
Ndufb7	-0.448953	10.0553	165.167	1.37154e-37	6.24398e-36
Gsr	-0.590145	9.68842	165.028	1.46968e-37	6.67987e-36
Slc2a2	-0.822844	9.48237	172.835	1.50581e-37	6.83303e-36
Scnn1a	-0.727861	9.33673	204.97	1.91424e-37	8.6723e-36
Pbld2	-0.75892	9.47333	191.405	2.01114e-37	9.09659e-36
Edf1	-0.452886	10.0166	164.257	2.15529e-37	9.73289e-36
Nfkb1	0.612432	9.2466	390.171	2.40177e-37	1.08285e-35
Map2k2	-0.674229	9.50886	182.646	2.47234e-37	1.11287e-35
Gabarap	-0.42985	10.2053	163.932	2.53395e-37	1.13877e-35
Esrra	-0.846079	9.35584	262.793	2.58473e-37	1.15837e-35
Dusp8	0.436449	9.19363	1957.75	2.58584e-37	1.15837e-35
Tcn2	-0.548896	10.1791	163.887	2.59079e-37	1.15874e-35
Emc6	-0.540156	9.68978	163.676	2.87791e-37	1.2851e-35
Ogt	-0.662408	9.56917	163.477	3.17742e-37	1.41658e-35
Zfp787	-0.667895	9.39809	202.849	3.78128e-37	1.68312e-35
Bax	-0.600481	9.45536	164.832	3.8445e-37	1.70854e-35
Tapbpl	0.587702	9.22581	542.593	6.5733e-37	2.91663e-35
Lpin1	-0.704417	9.31496	254.969	6.68096e-37	2.95971e-35
Cd81	-0.567419	9.81923	161.373	9.04309e-37	3.99982e-35
Mylip	0.598039	9.26345	330.657	9.24073e-37	4.08079e-35
Tpcn1	-0.837206	9.31865	286.879	1.18574e-36	5.22809e-35
Nampt	0.512733	9.53455	160.347	1.50647e-36	6.63179e-35
Tkfc	-0.634963	9.52765	160.302	1.54057e-36	6.77126e-35
Polr1d	-0.561961	9.6224	160.067	1.73203e-36	7.60085e-35
Pcgf5	0.585086	9.22981	497.539	2.05368e-36	8.99826e-35
Chchd4	-0.702203	9.41892	201.615	2.20406e-36	9.64205e-35
H2-DMb1	-0.776507	9.31215	266.423	2.41315e-36	1.05403e-34
Slc25a15	-0.703549	9.36885	211.035	2.44042e-36	1.06428e-34
Decr1	-0.633939	9.48718	168.948	2.48242e-36	1.08092e-34
Timp1	0.367751	9.18945	2723.99	2.53684e-36	1.1029e-34
Mlf2	-0.570525	9.57114	158.768	3.30413e-36	1.43425e-34
Reep5	-0.604305	9.4783	157.986	4.87624e-36	2.1129e-34
Nr2f6	-0.733985	9.38697	218.098	4.88266e-36	2.1129e-34
Rpl36al	-0.422239	10.2953	157.799	5.35287e-36	2.3128e-34
A230046K03Rik	0.592425	9.26156	340.26	5.40655e-36	2.3324e-34
Ap2a2	-0.718291	9.47629	184.061	5.43535e-36	2.34121e-34
Sav1	0.603203	9.27855	290.182	5.61541e-36	2.41506e-34
Vamp8	-0.435356	10.1555	157.334	6.74446e-36	2.89619e-34
Snhg9	-0.710125	9.38174	215.531	8.23999e-36	3.53298e-34
Adra2b	-0.865461	9.40947	200.801	1.0015e-35	4.28745e-34
Capzb	-0.617587	9.48403	156.037	1.28599e-35	5.49698e-34
Tomm5	-0.556907	9.62162	156.021	1.29642e-35	5.53309e-34
Ndufa8	-0.489194	9.85586	155.763	1.4742e-35	6.28229e-34
Prdx5	-0.326135	11.5151	155.488	1.6905e-35	7.19312e-34
Glrx5	-0.539909	9.64562	155.302	1.85382e-35	7.87608e-34
Fam208b	0.58424	9.23239	457.159	3.27292e-35	1.38841e-33
Slc25a19	-0.725732	9.29812	282.735	3.50144e-35	1.48143e-33
Jun	0.584279	9.65677	154.024	3.50278e-35	1.48143e-33
Col4a1	0.574363	9.32265	211.004	4.46448e-35	1.88532e-33
Tardbp	-0.655279	9.41157	185.376	4.72446e-35	1.9921e-33
Ccl21a	0.152484	9.20396	855.656	5.09651e-35	2.14575e-33
Ms4a6d	0.449887	9.20569	853.503	5.34464e-35	2.24683e-33
Entpd5	-0.68491	9.46481	163.909	5.729e-35	2.4048e-33
Hesx1	0.410638	9.19857	1336.9	7.02832e-35	2.94579e-33
Mafk	0.582566	9.22569	500.739	7.39717e-35	3.09575e-33
Smim20	-0.669216	9.42046	192.917	7.98363e-35	3.3362e-33
S100a13	-0.638872	9.39827	169.119	9.18596e-35	3.83291e-33
Ebi3	0.490367	9.20245	959.36	9.32488e-35	3.88509e-33
Nktr	0.49821	9.42891	159.637	9.55977e-35	3.97704e-33
Cfl1	-0.556208	9.89015	151.716	1.10492e-34	4.58986e-33
Gm15611	0.262836	9.18544	6690.54	1.30157e-34	5.39873e-33
Uqcrc1	-0.515836	9.76284	151.305	1.35581e-34	5.61536e-33
Pttg1ip	-0.636255	9.45612	168.674	1.44448e-34	5.97378e-33
Mettl7b	-0.700715	9.40165	185.111	1.61996e-34	6.68964e-33
Atp5g3	-0.382059	10.7452	150.618	1.90827e-34	7.86861e-33
Mrpl51	-0.531914	9.65384	150.605	1.92133e-34	7.91081e-33
Il27	0.297245	9.1872	3753.48	2.04947e-34	8.42601e-33
Ppdpf	-0.566745	9.54535	150.077	2.49858e-34	1.02574e-32
Baiap2	-0.80648	9.29163	299.773	2.56812e-34	1.05274e-32
Rps25	-0.371958	10.6394	149.959	2.64973e-34	1.08348e-32
Atp5a1	-0.404777	10.4404	149.958	2.65085e-34	1.08348e-32
Stub1	-0.618299	9.46243	172.641	2.70472e-34	1.10389e-32
Hexim1	-0.69437	9.29455	272.01	3.17549e-34	1.29414e-32
Ubash3b	0.543167	9.21671	603.174	4.0873e-34	1.66332e-32
Csrp1	0.596802	9.25466	308.043	4.43891e-34	1.80378e-32
Smtn	-0.696256	9.25748	366.479	7.46656e-34	3.02969e-32
Mrpl12	-0.523879	9.81121	147.648	8.3787e-34	3.39489e-32
Sec61b	-0.499628	9.76017	147.626	8.4686e-34	3.42636e-32
Mrpl20	-0.520827	9.63943	147.577	8.679e-34	3.50641e-32
Muc1	0.518642	9.22061	548.909	9.36418e-34	3.77778e-32
Sfrp1	-0.739156	9.34334	160.284	1.031e-33	4.15339e-32
Cyp24a1	-1.47125	9.47595	164.499	1.40943e-33	5.66972e-32
Mxd4	-0.691526	9.3229	224.769	1.69717e-33	6.8174e-32
Coro1a	-0.859069	9.36419	154.107	1.87964e-33	7.53957e-32
Hpn	-0.568146	9.58812	145.493	2.45118e-33	9.81804e-32
Enc1	0.422643	9.19375	1588.32	2.47323e-33	9.89223e-32
Zfp36l2	-0.646129	9.37369	180.476	2.80836e-33	1.12166e-31
Cdk4	-0.680316	9.32795	228.791	3.38735e-33	1.35098e-31
Pnkd	-0.536187	9.60277	144.503	4.01438e-33	1.59879e-31
Agps	0.465924	9.36177	179.281	4.07947e-33	1.6224e-31
Ms4a4b	0.547579	9.25754	236.777	4.28039e-33	1.69989e-31
Fam20c	-0.657789	9.24721	385.049	4.63663e-33	1.83876e-31
Scand1	-0.493188	9.76142	144.166	4.74694e-33	1.87984e-31
Ccnd2	0.562503	9.26939	234.631	5.09021e-33	2.01294e-31
Kng2	-0.73756	9.63895	143.916	5.37659e-33	2.12319e-31
Rnd3	0.546148	9.21876	545.749	5.94374e-33	2.34384e-31
Tspan3	-0.565298	9.52719	143.414	6.90709e-33	2.7199e-31
Tnfrsf12a	0.531904	9.29791	236.208	8.94505e-33	3.51746e-31
Bsnd	-0.618305	9.23513	428.636	9.45153e-33	3.71141e-31
Capns1	-0.547768	9.52584	142.658	1.00659e-32	3.94715e-31
Slc43a3	0.527654	9.21499	563.958	1.01671e-32	3.98122e-31
Coq10b	0.556788	9.29545	236.774	1.06393e-32	4.16031e-31
Plin2	0.4005	9.63938	142.279	1.2156e-32	4.74677e-31
Fkbp4	-0.675374	9.44455	174.551	1.41376e-32	5.51288e-31
Gdf15	0.51571	9.27515	246.92	1.49207e-32	5.81017e-31
Got2	-0.587632	9.49486	150.296	1.50335e-32	5.84594e-31
Ccl28	0.383525	9.19731	1215.8	1.59201e-32	6.18213e-31
Rpl5	-0.469524	9.92328	141.655	1.65941e-32	6.43493e-31
Polr2e	-0.661397	9.35746	204.911	2.33218e-32	9.03133e-31
Ndufs3	-0.51585	9.65964	140.945	2.3644e-32	9.14342e-31
Slc25a39	-0.541935	9.70231	140.915	2.39998e-32	9.26822e-31
Atp6v0b	-0.486403	9.78853	140.482	2.97755e-32	1.14828e-30
Retsat	-0.729768	9.37459	186.094	4.60637e-32	1.77399e-30
Slc9a3r2	-0.62368	9.23698	362.461	4.70334e-32	1.80885e-30
H1f0	-0.574039	9.48939	139.556	4.72406e-32	1.81432e-30
Phb2	-0.570483	9.555	147.524	4.75716e-32	1.82453e-30
Crim1	0.557274	9.31235	208.053	5.46944e-32	2.09485e-30
Hmgn1	-0.49142	9.77518	138.975	6.31322e-32	2.41472e-30
Coa3	-0.487709	9.70996	138.951	6.38908e-32	2.4404e-30
Gm12185	0.25177	9.18595	5429.09	6.94755e-32	2.6501e-30
Fastk	-0.675964	9.33794	216.815	7.50051e-32	2.85713e-30
Ndufa6	-0.328822	10.7281	138.163	9.4607e-32	3.59892e-30
Wsb1	-0.630121	9.40905	155.875	1.06252e-31	4.03643e-30
1110008P14Rik	-0.572861	9.43703	152.088	1.08936e-31	4.13278e-30
Cuta	-0.578615	9.49274	153.368	1.10718e-31	4.1947e-30
Mcl1	0.507252	9.4035	153.201	1.21933e-31	4.61335e-30
Epsti1	0.526333	9.22447	430.363	1.51456e-31	5.72263e-30
Gm12840	0.453571	9.20141	917.157	2.35167e-31	8.87358e-30
Mafg	-0.66769	9.39247	171.676	2.39483e-31	9.02428e-30
Vcp	-0.52833	9.55326	136.229	2.48202e-31	9.34027e-30
Mrpl57	-0.519766	9.54695	136.108	2.63679e-31	9.90937e-30
Acsm3	0.42872	9.43764	135.879	2.95555e-31	1.10924e-29
Ndufs7	-0.457192	9.89707	135.836	3.02043e-31	1.13208e-29
Adh1	0.495504	9.50069	135.788	3.09404e-31	1.15812e-29
Sat1	0.381268	10.3451	135.671	3.27896e-31	1.22569e-29
Vdac2	-0.508181	9.63231	135.585	3.42242e-31	1.27761e-29
Grb7	-0.715554	9.29654	258.355	3.55847e-31	1.32663e-29
Suclg1	-0.496311	9.76074	135.327	3.89266e-31	1.44929e-29
Ndufa11	-0.437392	9.96585	134.942	4.71827e-31	1.75434e-29
Spc25	-0.707501	9.30534	235.188	6.5076e-31	2.41644e-29
Guk1	-0.518822	9.53965	134.245	6.67942e-31	2.47696e-29
Car13	0.372169	9.19171	1860.35	7.02548e-31	2.60184e-29
Naa20	0.528496	9.36112	170.91	7.69326e-31	2.84539e-29
Raly	-0.594685	9.41304	151.246	8.31178e-31	3.07009e-29
Aif1l	-0.638776	9.44011	133.657	8.95802e-31	3.30444e-29
Hadh	-0.543586	9.69483	133.592	9.25097e-31	3.40801e-29
Bod1	-0.717066	9.34162	209.118	9.7814e-31	3.59868e-29
Ddx17	-0.59508	9.45369	148.016	1.07358e-30	3.94461e-29
Tmem160	-0.563966	9.44697	149.733	1.08558e-30	3.98351e-29
Mtss1	0.486374	9.31861	199.96	1.18011e-30	4.32472e-29
Pabpn1	-0.878256	9.36398	206.334	1.18587e-30	4.34012e-29
Hnrnpl	-0.665232	9.35506	196.562	1.22706e-30	4.48503e-29
Mbd3	-0.67632	9.33455	209.851	1.44132e-30	5.26128e-29
Myd88	0.535341	9.22404	454.715	1.4587e-30	5.31778e-29
Arhgdia	-0.563793	9.46641	141.446	1.8401e-30	6.6995e-29
Rpl6	-0.380202	10.5816	131.66	2.42604e-30	8.82132e-29
Epn1	-0.627269	9.46138	153.452	2.49136e-30	9.04711e-29
Gna11	-0.66525	9.27474	280.149	2.74044e-30	9.9387e-29
Bcl2a1d	0.483459	9.22111	428.381	2.79593e-30	1.01268e-28
Spsb4	-0.825349	9.28926	275.696	2.83525e-30	1.0256e-28
Gadd45b	0.459627	9.21017	647.459	2.83968e-30	1.02588e-28
Srcin1	-0.692954	9.24931	356.784	2.89692e-30	1.04521e-28
Pou3f3	-0.666907	9.30078	214.297	2.90566e-30	1.04701e-28
Prkcz	-0.657196	9.34473	193.527	3.00237e-30	1.08047e-28
Ldhb	-0.437457	10.4647	131.172	3.09538e-30	1.11251e-28
Tkt	-0.622105	9.44041	150.094	3.25505e-30	1.16839e-28
Chp1	-0.593134	9.4211	155.486	3.28025e-30	1.17594e-28
Svopl	0.477198	9.26443	279.721	3.39748e-30	1.2164e-28
Hoxa7	-0.717282	9.35013	199.789	3.73233e-30	1.33458e-28
Atp6v1f	-0.40753	10.1461	130.682	3.95338e-30	1.41182e-28
Fam195a	-0.616973	9.63906	130.461	4.41253e-30	1.57378e-28
Mrps16	-0.53522	9.49218	136.523	5.11737e-30	1.82285e-28
Rbm43	0.455812	9.20058	916.026	5.18649e-30	1.84512e-28
Cycs	0.327119	10.8874	130.068	5.37009e-30	1.90802e-28
Cd209a	0.238309	9.18876	1622.36	5.82118e-30	2.06567e-28
Aldh9a1	-0.698045	9.47482	145.621	6.605e-30	2.34085e-28
Ap1s1	-0.622917	9.32742	201.79	6.97458e-30	2.4687e-28
Tmem184b	0.499086	9.20863	654.97	7.04686e-30	2.49114e-28
Txn2	-0.512788	9.61963	129.027	9.03042e-30	3.18832e-28
Setd8	-0.700235	9.3406	197.841	9.21089e-30	3.24794e-28
Clta	-0.50454	9.66589	128.906	9.59009e-30	3.3774e-28
mt-Co2	0.338427	13.8332	128.79	1.01625e-29	3.5745e-28
Asb4	0.325886	9.1889	2364.35	1.14109e-29	4.00857e-28
Tmed2	-0.476738	9.67819	128.522	1.16181e-29	4.07625e-28
Tomm22	-0.567302	9.44654	148.389	1.19015e-29	4.17043e-28
Samm50	-0.616326	9.39409	169.735	1.23517e-29	4.32278e-28
Tbcb	-0.556007	9.41231	148.217	1.24974e-29	4.36832e-28
Rnf225	0.193537	9.18442	6027.84	1.319e-29	4.60467e-28
Hspa8	0.323294	10.6444	128.08	1.44895e-29	5.052e-28
Srxn1	-0.62753	9.28242	245.575	1.57557e-29	5.48665e-28
Snrpd3	-0.524558	9.47421	131.501	1.66567e-29	5.79322e-28
Hadhb	-0.539978	9.48007	131.317	1.70665e-29	5.9284e-28
Lamtor5	-0.474253	9.72981	127.383	2.05125e-29	7.11658e-28
Pdxk	-0.644102	9.31843	205.144	2.12097e-29	7.34938e-28
Plscr2	0.396721	9.96457	126.971	2.52037e-29	8.72254e-28
Lrpap1	-0.545239	9.58945	126.784	2.76664e-29	9.563e-28
Mdh2	-0.477742	9.735	126.706	2.87724e-29	9.93305e-28
Robo4	0.409441	9.19676	1140.85	2.88515e-29	9.94808e-28
Aco2	-0.499531	9.7893	126.483	3.21589e-29	1.10748e-27
Tmem176a	-0.478153	9.94509	126.142	3.81242e-29	1.3113e-27
Hsp90b1	-0.505331	9.79177	125.957	4.18116e-29	1.43637e-27
Nkg7	-0.684145	9.32482	129.281	4.59735e-29	1.57741e-27
S100a1	-0.436561	10.2468	125.736	4.67017e-29	1.60043e-27
Ostf1	-0.542909	9.48017	125.546	5.13368e-29	1.75712e-27
Idh1	-0.537794	9.88244	125.436	5.42455e-29	1.85441e-27
Tfrc	-0.686349	9.30233	214.668	6.1732e-29	2.10777e-27
Gm3248	0.218008	9.18482	5013.5	6.34992e-29	2.16547e-27
Tecr	-0.541668	9.49605	132.614	6.6353e-29	2.26004e-27
Sgk2	-0.7294	9.34849	193.701	6.76705e-29	2.30211e-27
Abca3	-0.564196	9.49103	124.877	7.17121e-29	2.43664e-27
Frmd4b	0.427298	9.38172	150.161	7.26492e-29	2.4655e-27
Tmem234	-0.557439	9.47912	137.077	8.24339e-29	2.79417e-27
Cirbp	-0.60591	9.3404	179.79	9.16099e-29	3.10144e-27
Nudt16l1	-0.625399	9.26901	271.835	1.01751e-28	3.44061e-27
Lamtor1	-0.591445	9.43492	148.407	1.03099e-28	3.48197e-27
Dtnbp1	-0.647748	9.335	195.172	1.12818e-28	3.80563e-27
Igsf11	-0.585262	9.35299	160.428	1.17097e-28	3.94521e-27
Aqp1	-0.927265	9.63285	123.849	1.19833e-28	4.03257e-27
Ap2s1	-0.539234	9.45842	136.485	1.26527e-28	4.25271e-27
Asb13	0.501538	9.34501	170.965	1.30318e-28	4.37489e-27
Tspan33	-0.698023	9.28153	261.739	1.43637e-28	4.81622e-27
Gtf2i	-0.709504	9.35107	193.776	1.48014e-28	4.95704e-27
Rasgef1b	0.329706	9.19086	1850.64	1.51705e-28	5.07459e-27
Sema4d	-0.651211	9.26304	283.06	1.53071e-28	5.11419e-27
Smdt1	-0.362003	10.2148	123.173	1.68004e-28	5.6064e-27
Set	-0.551622	9.43245	136.589	1.85436e-28	6.18076e-27
Adipor1	-0.539825	9.47295	133.121	1.90598e-28	6.34527e-27
Trim30b	0.346631	9.19197	1696.57	1.91607e-28	6.37127e-27
Stard8	-0.661865	9.27234	258.921	2.12738e-28	7.06552e-27
Tnfrsf11b	0.253988	9.18537	4767.18	2.21827e-28	7.35867e-27
Rnh1	-0.590186	9.35566	165.087	2.25802e-28	7.48167e-27
Ccser2	-0.692933	9.4623	141.306	2.61103e-28	8.64108e-27
Eif1a	0.522974	9.30807	188.226	2.62122e-28	8.66458e-27
Lman2	-0.568688	9.39757	150.949	2.64508e-28	8.73312e-27
Sdhd	-0.50521	9.66779	122.24	2.67718e-28	8.82871e-27
Tgif1	0.535449	9.26032	260.252	2.77313e-28	9.13436e-27
Gnpda1	-0.766159	9.3324	204.636	3.11656e-28	1.02535e-26
Kcnj10	-0.61839	9.26509	241.556	3.26682e-28	1.07352e-26
Rell1	0.518434	9.22275	418	3.3285e-28	1.09251e-26
B4galt1	0.51811	9.30717	191.484	3.42673e-28	1.12344e-26
Sh3bgrl3	-0.671395	9.86028	121.713	3.48477e-28	1.14113e-26
Reep6	-0.920755	9.31956	236.882	3.72871e-28	1.21958e-26
Ttc14	-0.678421	9.36292	174.09	4.37549e-28	1.42946e-26
Polr2f	-0.497496	9.52572	121.252	4.38757e-28	1.43174e-26
Eif6	0.429566	9.51621	121.175	4.56015e-28	1.48632e-26
Zfyve21	-0.659578	9.29544	223.736	4.62416e-28	1.50543e-26
Naca	-0.406697	10.069	121.131	4.65966e-28	1.51523e-26
Cox14	-0.429721	9.8311	121.123	4.68008e-28	1.5201e-26
Tmem116	-0.664841	9.29435	228.958	5.12363e-28	1.66224e-26
Ip6k2	-0.603537	9.31911	190.902	5.15632e-28	1.67091e-26
Gde1	-0.613642	9.4235	150.602	5.97486e-28	1.93392e-26
Nfic	-0.740549	9.35242	187.045	5.99749e-28	1.939e-26
2310036O22Rik	-0.490251	9.55102	120.489	6.42321e-28	2.07425e-26
Spns3	-0.710111	9.25691	286.321	6.61321e-28	2.13314e-26
Brk1	-0.543272	9.47839	132.57	6.90766e-28	2.22555e-26
Slc16a1	-0.607289	9.305	192.067	7.31672e-28	2.35464e-26
Gm26764	0.366631	9.19249	1533.63	7.61597e-28	2.44813e-26
Dazap2	-0.476594	9.62178	119.85	8.84269e-28	2.83919e-26
Eva1a	-0.608161	9.36063	162.051	9.34948e-28	2.99847e-26
BC034090	-0.680227	9.28161	249.776	9.7067e-28	3.10948e-26
Atp5h	-0.349002	10.4553	119.564	1.0202e-27	3.26441e-26
Gltp	-0.645475	9.29321	217.919	1.05295e-27	3.36535e-26
Cdc34	-0.623928	9.31332	197.634	1.16567e-27	3.72137e-26
Fmnl2	0.459489	9.20217	778.885	1.49436e-27	4.76527e-26
Serpina3g	0.397456	9.2055	652.763	1.59483e-27	5.07988e-26
Irf8	0.517305	9.26585	218.317	1.64159e-27	5.22288e-26
Cenpb	-0.62849	9.36763	164.472	1.71985e-27	5.46564e-26
Gm3512	0.213021	9.18483	5565.25	1.80622e-27	5.73363e-26
Uck1	-0.639863	9.28089	242.521	2.03632e-27	6.45674e-26
Slc34a1	-0.504521	10.993	118.166	2.05141e-27	6.49722e-26
Emp1	0.507041	9.22271	385.815	2.13887e-27	6.76655e-26
Mtch1	-0.615768	9.3854	158.222	2.17521e-27	6.86927e-26
Slc48a1	-0.596448	9.38966	155.435	2.17624e-27	6.86927e-26
Blvra	-0.589986	9.33907	170.732	2.18427e-27	6.88683e-26
Npm3	-0.606032	9.33813	168.437	2.22979e-27	7.02247e-26
Nfkb2	0.470044	9.21149	530.306	2.39793e-27	7.54352e-26
Dao	-0.574241	9.65978	117.653	2.65196e-27	8.33329e-26
Mrps26	-0.570385	9.41907	144.309	2.6704e-27	8.38182e-26
Fuca1	-0.507062	9.59926	117.448	2.93744e-27	9.20968e-26
Apela	-0.657612	9.32984	121.945	3.07623e-27	9.63403e-26
Gatad1	-0.58925	9.43962	135.464	3.68082e-27	1.15146e-25
Hdgf	-0.514731	9.5356	116.902	3.85931e-27	1.20595e-25
Dennd5b	-0.679354	9.35101	168.465	3.98519e-27	1.2439e-25
Clrn3	-0.598338	9.25232	289.792	4.04979e-27	1.26265e-25
Mlec	-0.526189	9.56027	116.763	4.13669e-27	1.28831e-25
Sumo2	-0.439172	9.81778	116.302	5.20938e-27	1.62058e-25
Cers2	-0.584618	9.37812	155.777	5.23686e-27	1.62732e-25
Neurl3	0.406446	9.20512	673.069	5.76177e-27	1.78845e-25
Pcbp2	-0.40662	9.94524	116.053	5.90049e-27	1.82948e-25
Rpl37a	-0.259817	11.5159	116.038	5.94703e-27	1.84187e-25
Ddx5	0.348286	10.2028	116.026	5.98016e-27	1.85008e-25
Hmgb1	-0.400249	10.0034	115.982	6.11418e-27	1.88904e-25
Nmrk1	-0.698793	9.42007	138.15	6.11956e-27	1.88904e-25
Nr1d2	0.494324	9.27788	219.285	6.53062e-27	2.0137e-25
Pawr	0.430383	9.21459	503.021	6.657e-27	2.05041e-25
C330006A16Rik	-0.642351	9.30279	209.419	7.29942e-27	2.24581e-25
Il33	0.318943	9.1902	1820.8	7.4962e-27	2.30383e-25
Sdhaf1	-0.623392	9.34111	174.986	7.71651e-27	2.36893e-25
Dag1	-0.622371	9.29573	203.328	8.15109e-27	2.49961e-25
Cst3	-0.542029	9.96342	115.112	9.44823e-27	2.89422e-25
Egfl7	-0.66026	9.25765	222.2	1.01143e-26	3.09485e-25
Fbxo21	-0.576383	9.24356	320.608	1.09486e-26	3.34649e-25
Lipg	0.29247	9.18828	2756.41	1.1491e-26	3.50844e-25
Tex264	-0.609307	9.35643	166.003	1.17557e-26	3.58536e-25
Sppl2a	0.492976	9.34696	148.321	1.23767e-26	3.77065e-25
Ifit1bl1	0.308544	9.18915	2029.87	1.32776e-26	4.04033e-25
Il1f6	0.083238	9.19796	1170.96	1.32907e-26	4.04033e-25
Ptbp1	-0.59789	9.31862	187.324	1.36848e-26	4.1556e-25
Slc35b4	-0.638856	9.28295	231.099	1.39286e-26	4.22404e-25
Psenen	-0.470342	9.55954	114.334	1.39403e-26	4.22404e-25
Sys1	-0.575381	9.3962	146.335	1.4055e-26	4.25088e-25
Morc3	0.503877	9.22819	362.332	1.40593e-26	4.25088e-25
Ctnnbip1	-0.599205	9.32504	178.161	1.50157e-26	4.53516e-25
Lgals3bp	0.35194	9.38872	157.45	1.56306e-26	4.71578e-25
Timm10b	-0.489466	9.4931	118.843	1.69598e-26	5.11131e-25
Tmem147	-0.463572	9.63087	113.678	1.93575e-26	5.82764e-25
Rab3ip	-0.55432	9.55954	117.734	2.04427e-26	6.14775e-25
Rbmx	-0.618842	9.26463	258.116	2.29118e-26	6.88289e-25
Grina	-0.455089	9.8639	113.289	2.35178e-26	7.05736e-25
Slc25a10	-0.65466	9.51735	123.247	2.63545e-26	7.90014e-25
Pold4	-0.609065	9.26836	244.307	2.87522e-26	8.60967e-25
Gna12	-0.625187	9.29055	212.41	2.96115e-26	8.8575e-25
H2-Q6	0.48651	9.22081	399.427	3.09213e-26	9.23944e-25
Anp32a	-0.509747	9.47373	118.25	3.71222e-26	1.10805e-24
Mrpl34	-0.486978	9.63871	112.366	3.73166e-26	1.11266e-24
Echdc2	-0.575549	9.44707	129.132	3.85261e-26	1.1475e-24
Zc3h7a	0.515505	9.27261	216.781	4.1247e-26	1.22724e-24
Gm5796	0.180045	9.18421	3270.34	4.62904e-26	1.37584e-24
Slc19a1	-0.608706	9.3374	167.204	5.73865e-26	1.70383e-24
S100a9	0.437789	10.4578	111.497	5.76535e-26	1.70994e-24
Tmem150a	-0.770337	9.41054	148.491	5.83725e-26	1.72943e-24
Eva1b	-0.576016	9.26445	227.761	5.98203e-26	1.77045e-24
Usf2	-0.609591	9.30382	197.796	6.15703e-26	1.82032e-24
Srsf2	-0.484613	9.81182	111.355	6.18848e-26	1.82769e-24
Chd4	-0.603063	9.37756	150.276	6.27565e-26	1.85148e-24
Tm2d2	-0.568553	9.44822	130.488	7.58886e-26	2.23656e-24
Ppp2r3a	-0.618538	9.35773	157.478	7.83842e-26	2.30768e-24
Eci2	-0.55638	9.43206	133.318	8.98331e-26	2.64196e-24
Ppm1k	0.464629	9.22937	348.976	9.23533e-26	2.71323e-24
Ddc	-0.603764	9.31895	176.742	9.71673e-26	2.85167e-24
Rasd1	0.441609	9.22874	338.539	9.83822e-26	2.8843e-24
Ptgs2	0.222301	9.18757	2570.12	1.00593e-25	2.94602e-24
2020-09-15	-0.446459	9.69758	110.194	1.10653e-25	3.23726e-24
Ppp2r4	-0.63312	9.31788	190.148	1.12678e-25	3.29308e-24
Mrfap1	-0.473771	9.6048	110.04	1.19508e-25	3.48904e-24
Rpl23a	-0.336716	10.6272	109.908	1.27711e-25	3.72404e-24
Trim30c	0.195323	9.18461	5690.64	1.27823e-25	3.72404e-24
Bicc1	-0.582646	9.41798	131.69	1.33398e-25	3.8824e-24
Lrg1	0.221602	9.33729	152.218	1.40381e-25	4.0814e-24
Rab24	-0.573	9.40106	140.002	1.4434e-25	4.19215e-24
Nop10	-0.36639	10.1522	109.506	1.56122e-25	4.52965e-24
Pdia6	-0.527428	9.40029	125.823	1.59209e-25	4.61443e-24
Gatsl2	-0.735045	9.29091	216.835	1.81359e-25	5.25097e-24
Kidins220	-0.613462	9.39974	141.091	1.8769e-25	5.42867e-24
Alox5ap	-0.855523	9.33288	134.52	2.13609e-25	6.17196e-24
G6pc	-0.572176	9.8711	108.833	2.18671e-25	6.3117e-24
Psmd8	-0.496735	9.45439	117.197	2.2818e-25	6.57938e-24
Lage3	-0.550039	9.36817	146.383	2.42516e-25	6.98557e-24
Rogdi	-0.668164	9.36041	160.622	2.6243e-25	7.55141e-24
A530040E14Rik	0.218933	9.18546	4367.57	2.64361e-25	7.59916e-24
Psmb3	-0.45758	9.60028	108.383	2.73936e-25	7.86632e-24
Gm3636	0.184466	9.18427	5658.43	2.74724e-25	7.88086e-24
Vamp5	-0.575566	9.2658	219.147	2.86678e-25	8.21537e-24
2810428I15Rik	-0.530076	9.43569	127.975	3.01365e-25	8.62742e-24
Ddx24	0.471052	9.33995	150.88	3.02497e-25	8.65098e-24
Sall2	-0.44105	9.2136	514.772	3.13607e-25	8.95957e-24
Irf9	0.49637	9.2351	304.171	3.41736e-25	9.75076e-24
Pdia4	-0.575786	9.37323	142.64	3.41997e-25	9.75076e-24
Sf3b5	-0.494603	9.44733	118.212	3.44076e-25	9.80004e-24
Sdf2l1	-0.564779	9.28059	191.662	3.54402e-25	1.00839e-23
Mgll	-0.637135	9.28751	207.986	3.60273e-25	1.02405e-23
Higd2a	-0.392271	9.92751	107.832	3.60914e-25	1.02477e-23
Sod3	-0.62824	9.50475	111.309	3.61256e-25	1.02477e-23
Tgm1	0.414362	9.20723	576.788	3.66893e-25	1.0397e-23
Lgals8	0.49998	9.29629	183.621	3.80283e-25	1.07656e-23
Rnaset2b	-0.54065	9.38619	133.783	3.87688e-25	1.09641e-23
Hivep1	0.483548	9.22199	378.193	3.95093e-25	1.11623e-23
Eif4h	-0.576774	9.36323	151.107	3.99212e-25	1.12673e-23
Bri3	-0.394795	9.93145	107.628	3.99925e-25	1.1276e-23
Ccl20	0.216635	9.19271	1278.03	4.01691e-25	1.13144e-23
Fkbp5	0.458689	9.32828	154.652	4.31434e-25	1.214e-23
Ndufs2	-0.445827	9.67923	107.472	4.32413e-25	1.21553e-23
Tomm40	-0.619575	9.30109	194.926	4.74733e-25	1.3327e-23
Sumo3	-0.555811	9.37066	143.496	4.75048e-25	1.3327e-23
Igfbp3	0.492295	9.28787	138.467	5.78764e-25	1.62205e-23
Nudc	-0.534748	9.3767	138.807	5.99608e-25	1.67878e-23
Gm8730	-0.469313	9.51464	106.679	6.42933e-25	1.79829e-23
Pfn2	-0.584502	9.32302	166.016	6.99413e-25	1.95431e-23
Fcer1g	0.457156	9.61869	106.457	7.18511e-25	2.00567e-23
2410015M20Rik	-0.363741	10.0851	106.32	7.69816e-25	2.14674e-23
Ccdc12	-0.491244	9.46722	112.812	7.75456e-25	2.16032e-23
Abhd17a	-0.655616	9.33216	176.725	8.23549e-25	2.29202e-23
Dleu7	-0.693025	9.27485	227.832	8.41157e-25	2.3387e-23
Mrps24	-0.427345	9.71698	106.025	8.92109e-25	2.4779e-23
Osm	0.340197	9.19622	1002.32	1.00628e-24	2.79225e-23
Bnip3	-0.461571	9.61894	105.744	1.02737e-24	2.84795e-23
Gss	-0.590903	9.45363	117.594	1.03073e-24	2.85444e-23
Dynll1	-0.459674	9.74688	105.667	1.06746e-24	2.95324e-23
Amn1	0.49263	9.28022	192.058	1.137e-24	3.14253e-23
Gprc5c	-0.596239	9.35823	149.807	1.25658e-24	3.46959e-23
Ehd4	0.470623	9.24004	245.475	1.27804e-24	3.52537e-23
Vegfb	-0.677069	9.28329	218.759	1.28487e-24	3.54073e-23
Srp14	-0.458371	9.51395	105.228	1.32986e-24	3.6611e-23
Bscl2	-0.639262	9.3082	189.588	1.47316e-24	4.05161e-23
Slco3a1	0.420662	9.35426	137.537	1.50772e-24	4.1426e-23
Eps8l2	-0.58977	9.36949	145.275	1.56832e-24	4.30487e-23
Fis1	-0.416937	9.74423	104.844	1.61246e-24	4.42171e-23
Slc20a1	0.486918	9.26315	218.418	1.66398e-24	4.55853e-23
Lamc2	0.429187	9.21161	474.15	1.82151e-24	4.9852e-23
Pgpep1	-0.512649	9.47205	112.215	2.04625e-24	5.59481e-23
1110001J03Rik	-0.431943	9.74031	104.093	2.34865e-24	6.41537e-23
Isoc2a	-0.886481	9.32758	186.772	2.48294e-24	6.77556e-23
Snx2	0.482943	9.31401	157.974	2.50281e-24	6.82315e-23
Slfn8	0.319876	9.18927	1941.67	2.56329e-24	6.98122e-23
Arf1	-0.44608	9.64125	103.821	2.69121e-24	7.3225e-23
Dgcr6	-0.479591	9.50836	104.491	2.73608e-24	7.43737e-23
Dazap1	-0.558061	9.33177	159.235	2.81273e-24	7.63828e-23
Oaz2	-0.589584	9.41284	132.029	2.89213e-24	7.84631e-23
Psmc3	-0.50243	9.44491	119.45	2.93716e-24	7.96076e-23
Dynlrb1	-0.432071	9.62573	103.605	2.99925e-24	8.11393e-23
Ccl6	-0.841719	9.29135	160.637	2.99947e-24	8.11393e-23
Cx3cl1	0.498111	9.24289	266.88	3.04469e-24	8.2283e-23
Hmg20b	-0.570445	9.32518	165.081	3.16787e-24	8.55295e-23
Rnaset2a	-0.547642	9.34607	143.516	3.17887e-24	8.57437e-23
Fam63a	-0.560112	9.33253	153.491	3.34742e-24	9.02032e-23
Emcn	-0.644193	9.26358	186.164	3.4045e-24	9.1653e-23
Fabp3	-0.556693	9.49387	103.245	3.59264e-24	9.66252e-23
Gm5424	0.391972	9.37594	127.643	3.60268e-24	9.68022e-23
Cbx3	-0.496711	9.42502	111.997	3.8293e-24	1.02793e-22
mt-Nd1	0.285065	14.4722	103.084	3.89314e-24	1.04406e-22
Hes6	-0.60672	9.32096	170.365	4.09468e-24	1.09706e-22
Apoe	-0.606037	9.50751	102.879	4.31424e-24	1.15478e-22
Rnf187	-0.53847	9.46227	119.06	4.43407e-24	1.18572e-22
H3f3a	-0.387665	10.1175	102.762	4.57637e-24	1.22261e-22
Btg1	0.458583	9.59441	102.753	4.59539e-24	1.22652e-22
Rp9	-0.589974	9.36291	148.173	4.61184e-24	1.22974e-22
Prcp	-0.584569	9.33754	154.521	4.85741e-24	1.29398e-22
Ctgf	0.393416	9.20363	574.669	5.35651e-24	1.42558e-22
Uqcc2	-0.439269	9.62061	102.442	5.37213e-24	1.42838e-22
Krtcap2	-0.456703	9.50437	102.283	5.81726e-24	1.54527e-22
Tpgs1	-0.559578	9.28651	191.717	6.88452e-24	1.82704e-22
Paqr9	-0.629405	9.35032	143.964	7.1952e-24	1.90768e-22
Apol10b	0.246099	9.18638	3469.77	7.85664e-24	2.08108e-22
Bsg	-0.386478	9.92571	101.665	7.92645e-24	2.09759e-22
Ptpn18	-0.644629	9.29685	165.482	8.30375e-24	2.19536e-22
Gm16685	0.445259	9.22223	365.892	8.36579e-24	2.20967e-22
Zfp771	-0.584476	9.28025	206.01	8.51245e-24	2.24629e-22
Uba7	0.354463	9.19785	846.345	9.58242e-24	2.52626e-22
Desi1	-0.551143	9.25798	235.643	1.14396e-23	3.01304e-22
Ccdc25	0.492102	9.25778	223.381	1.14862e-23	3.02247e-22
Hnrnpu	-0.46075	9.50181	100.881	1.17443e-23	3.08748e-22
Glul	0.398182	9.82359	100.743	1.25867e-23	3.30583e-22
Slc7a11	0.336005	9.19443	939.969	1.36876e-23	3.5916e-22
Tex261	-0.567672	9.33191	156.883	1.61055e-23	4.22211e-22
Thy1	-0.481235	9.21809	388.112	1.71446e-23	4.49032e-22
Drap1	-0.489091	9.44651	110.855	1.74505e-23	4.56617e-22
Aspscr1	-0.605362	9.31484	172.693	1.75955e-23	4.5998e-22
Ccdc28b	-0.516216	9.23119	321.116	1.76505e-23	4.60988e-22
Hacl1	-0.675705	9.26367	253.463	1.77063e-23	4.62014e-22
Gucd1	-0.594753	9.31587	166.329	1.77778e-23	4.63446e-22
Rab11fip5	-0.573139	9.26958	216.474	1.98381e-23	5.16675e-22
Abhd14b	-0.651597	9.57798	111.244	2.15974e-23	5.61973e-22
Rassf7	-0.500995	9.23107	323.113	2.52721e-23	6.56789e-22
2310039H08Rik	-0.451189	9.52369	99.3511	2.52882e-23	6.56789e-22
Mgat2	-0.513414	9.40411	119.966	2.55477e-23	6.62511e-22
Srsf6	-0.458596	9.5086	99.361	2.55558e-23	6.62511e-22
Nabp2	-0.592596	9.30174	179.61	2.56815e-23	6.65153e-22
H2-DMa	-0.564757	9.24639	253.753	2.90522e-23	7.51759e-22
Hoxd9	-0.556154	9.27479	185.396	2.91522e-23	7.53651e-22
Kansl1l	0.407474	9.35616	129.744	2.92745e-23	7.56113e-22
Pbxip1	-0.576778	9.31502	154.876	3.01102e-23	7.76982e-22
Haghl	-0.532694	9.24164	280.138	3.03662e-23	7.82867e-22
Rnf145	0.453964	9.28264	177.732	3.13567e-23	8.0766e-22
Nxf1	-0.487979	9.45059	112.175	3.24639e-23	8.35407e-22
Grhpr	-0.507417	9.55702	98.5973	3.69043e-23	9.48802e-22
Fam162a	-0.513818	9.4144	119.628	3.85308e-23	9.89712e-22
Bckdk	-0.581197	9.31006	171.629	4.06441e-23	1.04304e-21
Prdx6	-0.454697	9.59391	98.4029	4.06819e-23	1.04305e-21
Gm14964	-0.551796	9.25858	218.403	4.41508e-23	1.13095e-21
Ndufs4	-0.436702	9.56046	98.2359	4.42357e-23	1.1321e-21
Pgam2	-0.612725	9.41912	98.2022	4.49914e-23	1.15038e-21
Glb1l2	-0.642325	9.29508	186.286	4.52461e-23	1.15584e-21
Glrx	-0.535423	9.33964	134.863	4.77348e-23	1.2183e-21
Oaz1	-0.279279	10.6256	97.948	5.11085e-23	1.30322e-21
Ppcs	-0.554914	9.28084	191.794	5.35913e-23	1.36529e-21
Tmem208	-0.499442	9.40737	117.439	5.86929e-23	1.49389e-21
Fxyd5	-0.645153	9.31091	130.716	6.04804e-23	1.53799e-21
Akr1c14	0.327748	9.23436	277.818	6.25545e-23	1.58929e-21
Get4	-0.555633	9.29269	179.349	7.43435e-23	1.8871e-21
Snx8	-0.59579	9.262	226.68	7.56119e-23	1.91756e-21
Cp	0.367629	9.24982	214.939	7.60111e-23	1.92594e-21
Polr2j	-0.464531	9.46277	106.923	7.74236e-23	1.95995e-21
Cd59a	-0.546747	9.26979	193.126	7.85031e-23	1.98548e-21
Dad1	-0.41309	9.70104	96.9721	8.33762e-23	2.10683e-21
C1qtnf4	-0.533027	9.24592	248.276	8.62115e-23	2.17651e-21
Aadat	0.377191	9.32882	128.744	8.86923e-23	2.23712e-21
Leng8	-0.572448	9.30783	165.208	9.33834e-23	2.35333e-21
Mapk3	-0.558767	9.26059	220.938	9.45056e-23	2.37947e-21
Dbi	-0.331306	11.8108	96.6655	9.72368e-23	2.44604e-21
Pcx	-0.497192	9.60922	96.4998	1.05668e-22	2.65575e-21
Ugt2b37	0.404189	9.25998	194.12	1.06236e-22	2.66762e-21
Wfdc15b	-0.697094	9.96765	96.3875	1.1179e-22	2.80457e-21
Anapc11	-0.481739	9.462	107.068	1.3042e-22	3.26901e-21
Palm	-0.657052	9.28959	193.846	1.31924e-22	3.30376e-21
2610001J05Rik	-0.465935	9.47602	102.423	1.33969e-22	3.35198e-21
Tmcc3	0.47564	9.25528	217.315	1.41532e-22	3.53805e-21
Erbb2	-0.516688	9.23909	276.812	1.46735e-22	3.66484e-21
Ssr3	-0.484545	9.45079	104.527	1.49221e-22	3.72361e-21
Pigx	-0.539921	9.28739	178.57	1.52297e-22	3.79698e-21
Zeb1	0.355186	9.19928	724.76	1.56062e-22	3.88739e-21
Klhdc2	-0.544588	9.3215	150.991	1.56831e-22	3.90307e-21
Bcl7c	-0.551405	9.31198	160.853	1.57873e-22	3.92551e-21
Idh2	-0.461135	9.67226	95.5734	1.6818e-22	4.1781e-21
Eif3k	-0.42482	9.6544	95.5597	1.69336e-22	4.20308e-21
Use1	-0.510989	9.44674	112.277	1.73265e-22	4.2968e-21
Caprin1	-0.461849	9.48748	98.0325	1.85015e-22	4.58411e-21
2020-09-01	-0.54275	9.24752	231.665	1.98598e-22	4.91631e-21
Tst	-0.613316	9.39335	123.815	2.04038e-22	5.04651e-21
Creg1	-0.526986	9.36041	125.688	2.32048e-22	5.73422e-21
Tceb2	-0.299875	10.2506	94.9287	2.32408e-22	5.73805e-21
Hoxd8	-0.539059	9.43073	94.8586	2.40725e-22	5.93818e-21
Vasn	-0.468979	9.22472	346.535	2.46361e-22	6.07184e-21
Tmem176b	-0.404073	9.94916	94.7153	2.58681e-22	6.36989e-21
Apobec3	0.440474	9.23035	261.612	2.69181e-22	6.61881e-21
Tmem25	-0.577207	9.23439	307.954	2.69263e-22	6.61881e-21
Acss1	-0.529945	9.38908	110.066	2.78266e-22	6.83412e-21
Ehhadh	-0.499241	9.73399	94.5509	2.80918e-22	6.89319e-21
Lad1	-0.580559	9.31183	159.422	2.81939e-22	6.9122e-21
S100a6	-0.749461	9.71721	94.5281	2.84148e-22	6.96025e-21
Il6st	0.456281	9.29635	161.328	3.02974e-22	7.41492e-21
Vim	-0.700765	9.28831	153.668	3.13549e-22	7.66703e-21
Rbl1	0.388967	9.20122	641.289	3.21429e-22	7.85284e-21
Stc1	0.348649	9.21069	445.773	3.22765e-22	7.87863e-21
Hras	-0.542196	9.34729	137.165	3.48275e-22	8.49392e-21
Emc10	-0.512536	9.38436	121.063	3.55589e-22	8.66473e-21
Ndufv1	-0.44875	9.54035	94.6611	4.48063e-22	1.09086e-20
Wbp1	-0.587637	9.3038	169.599	4.56189e-22	1.10968e-20
Cyp2a5	-0.812557	9.35361	132.709	4.83287e-22	1.17457e-20
Aup1	-0.512864	9.41211	115.281	4.85814e-22	1.17969e-20
Ciapin1	-0.533328	9.29136	171.095	4.99232e-22	1.21122e-20
Elmod2	0.434028	9.21667	373.448	5.11076e-22	1.23888e-20
Rpl27	-0.326656	10.2775	93.3359	5.1689e-22	1.25189e-20
Atp6v1g3	-0.664044	9.4736	93.3188	5.21343e-22	1.26159e-20
Ptbp3	0.427297	9.38111	104.773	5.73992e-22	1.38779e-20
Nt5c	-0.538891	9.29075	170.857	6.19301e-22	1.49605e-20
Arpc1a	-0.509431	9.39472	116.472	6.31902e-22	1.52517e-20
Gm26917	-0.598716	9.61392	92.8677	6.53817e-22	1.57671e-20
Zmynd8	-0.584403	9.30102	166.202	6.68671e-22	1.61114e-20
Cryab	-0.543019	9.40048	92.8161	6.70962e-22	1.61527e-20
Mgat1	-0.584375	9.30872	162.075	6.82534e-22	1.64172e-20
Slc22a28	-0.886055	9.50322	103.299	6.85645e-22	1.64778e-20
Llgl2	-0.55335	9.28729	176.126	7.29711e-22	1.75218e-20
Nrp1	0.433843	9.30668	134.624	7.47586e-22	1.79357e-20
Mrpl54	-0.400559	9.64926	92.3658	8.41135e-22	2.01628e-20
Nfkbie	0.349294	9.19564	868.404	8.4572e-22	2.02553e-20
Nfyc	-0.604094	9.27839	195.374	8.95677e-22	2.14335e-20
Uqcrfs1	-0.35903	10.0154	92.222	9.04088e-22	2.16163e-20
Nhs	-0.58473	9.25961	212.525	9.50747e-22	2.27125e-20
Ndufa7	-0.291032	10.3585	92.0953	9.63492e-22	2.29973e-20
Rhot2	-0.568828	9.28701	179.385	9.70385e-22	2.31421e-20
Folh1	-0.562331	9.40099	110.986	9.7578e-22	2.3251e-20
Oplah	-0.576919	9.34795	138.652	1.01589e-21	2.4186e-20
Il4i1	0.271265	9.18913	1607.82	1.03589e-21	2.46414e-20
Lix1l	0.291261	9.19	1481.25	1.06451e-21	2.53006e-20
Slc1a4	0.408647	9.20932	443.329	1.06654e-21	2.53274e-20
Phldb2	-0.544129	9.41743	114.039	1.11837e-21	2.65358e-20
Pacsin2	-0.588566	9.32122	149.988	1.39124e-21	3.29635e-20
Siva1	-0.485028	9.23388	272.284	1.39163e-21	3.29635e-20
Ctdsp1	-0.569966	9.33945	142.793	1.40861e-21	3.33375e-20
Acox3	-0.636333	9.4131	111.087	1.45278e-21	3.43538e-20
Dlst	-0.52355	9.42373	111.595	1.46832e-21	3.46921e-20
Gpsm3	-0.501204	9.22665	310.686	1.50873e-21	3.56166e-20
Agfg2	-0.545003	9.25227	227.79	1.56955e-21	3.70212e-20
Srsf3	0.382557	9.51629	90.9474	1.71454e-21	4.0407e-20
Zbtb38	-0.526237	9.28275	173.636	1.78443e-21	4.20189e-20
Cib1	-0.42827	9.57524	90.8643	1.78753e-21	4.20565e-20
Rnf10	-0.549054	9.37844	126.417	1.80587e-21	4.24523e-20
Snrpg	-0.428639	9.58177	90.7404	1.90229e-21	4.46815e-20
Adrm1	-0.508121	9.32143	138.739	2.21229e-21	5.19192e-20
Vdac3	-0.447552	9.4591	97.0255	2.2206e-21	5.20706e-20
Eif5a	-0.367929	9.91248	90.4082	2.24761e-21	5.26598e-20
Gng5	-0.297103	10.3711	90.2874	2.38824e-21	5.5908e-20
Pfdn5	-0.333121	10.0605	90.198	2.49789e-21	5.83889e-20
Map3k2	0.451354	9.27891	168.232	2.49839e-21	5.83889e-20
Pigyl	-0.491397	9.38141	115.775	2.54376e-21	5.93997e-20
Selp	0.245418	9.18697	2544.42	2.98232e-21	6.95826e-20
Dpm3	-0.412529	9.57651	89.778	3.08447e-21	7.1906e-20
Plet1	0.438398	9.23078	231.743	3.19837e-21	7.44992e-20
Ppp1r1b	-0.57547	9.2416	234.727	3.37961e-21	7.86552e-20
Gas1	-0.587642	9.25382	222.519	3.45951e-21	8.04479e-20
Zbtb20	0.322095	10.1782	89.4775	3.58685e-21	8.334e-20
Nat8	-0.546716	9.71314	89.452	3.63313e-21	8.43454e-20
Psmb4	-0.442693	9.48305	93.4893	3.65523e-21	8.47879e-20
Mrpl55	-0.470979	9.41084	107.695	3.7979e-21	8.80245e-20
Med13	0.441027	9.28277	165.775	3.95304e-21	9.15443e-20
Rap1gap	-0.603955	9.26797	189.721	3.97025e-21	9.18671e-20
Fgf1	-0.664879	9.33173	135.346	4.13571e-21	9.56165e-20
Cyp4a12b	-0.56887	9.24127	270.009	4.27883e-21	9.88437e-20
Mpv17l2	-0.535489	9.29095	166.932	4.39529e-21	1.0145e-19
Sf3b2	-0.528117	9.34389	131.177	4.4932e-21	1.03625e-19
Ppt2	-0.599777	9.32781	144.164	4.60224e-21	1.06052e-19
Anapc5	-0.540018	9.37598	123.89	4.68768e-21	1.07932e-19
Slc22a1	-0.566785	9.4895	94.437	4.78637e-21	1.10114e-19
Pigr	-0.563525	9.32247	125.898	5.02967e-21	1.15616e-19
Tmem59	-0.403367	9.685	88.7886	5.0698e-21	1.16443e-19
Cope	-0.444537	9.46133	96.9957	5.21299e-21	1.19634e-19
Sec11a	-0.469322	9.3911	107.873	5.4249e-21	1.24395e-19
Sigirr	-0.646356	9.3133	159.761	5.66782e-21	1.29859e-19
Snx3	-0.424747	9.59216	88.5307	5.77108e-21	1.32117e-19
Cyb5b	-0.444044	9.55684	88.4544	5.99668e-21	1.37169e-19
Dnpep	-0.510467	9.2619	196.733	6.32564e-21	1.44576e-19
Cnbp	-0.425467	9.53609	88.2116	6.77444e-21	1.54707e-19
Bnip3l	-0.449105	9.44917	96.4167	6.85363e-21	1.56388e-19
S100a8	0.353934	10.9912	88.095	7.18313e-21	1.63773e-19
Dapk1	-0.503465	9.2512	215.272	7.2233e-21	1.64555e-19
Vimp	-0.458921	9.42162	100.366	8.2062e-21	1.86794e-19
Zfp768	-0.525994	9.24217	249.809	8.29562e-21	1.88676e-19
Thap3	-0.518783	9.25111	221.87	8.91684e-21	2.02641e-19
Ift20	-0.4936	9.41867	107.446	8.99861e-21	2.04333e-19
H2-T22	0.405052	9.3948	103.55	9.17278e-21	2.08119e-19
Adcy6	-0.51575	9.24603	230.947	9.51249e-21	2.15652e-19
Atraid	-0.462386	9.48008	94.672	1.00196e-20	2.26965e-19
Dgkz	-0.501881	9.23659	260.847	1.02294e-20	2.31529e-19
St13	-0.405341	9.75576	87.3123	1.06442e-20	2.40724e-19
Psat1	-0.525791	9.31196	136.088	1.06966e-20	2.41713e-19
Mrpl35	-0.472361	9.38558	108.121	1.11716e-20	2.52243e-19
H2afj	-0.312262	10.3194	87.2029	1.12456e-20	2.53711e-19
Kctd1	0.443171	9.25488	183.318	1.13733e-20	2.56385e-19
N4bp1	0.431456	9.24214	231.756	1.16691e-20	2.62842e-19
H13	-0.487431	9.3761	112.381	1.18065e-20	2.65722e-19
AI480526	-0.577195	9.24916	234.628	1.21768e-20	2.73837e-19
Eef1d	-0.4371	9.52438	86.9849	1.25478e-20	2.81952e-19
Cdh16	-0.455506	9.72843	86.8558	1.33883e-20	3.00374e-19
Spsb3	-0.518088	9.25692	206.793	1.33891e-20	3.00374e-19
Ppp5c	-0.542632	9.28192	173.737	1.38937e-20	3.11447e-19
Mov10	0.397516	9.20878	434.589	1.42538e-20	3.19262e-19
Ctsa	-0.519811	9.39564	108.536	1.51338e-20	3.38702e-19
Usp10	-0.516997	9.25554	208.174	1.52944e-20	3.42023e-19
Cited2	-0.499158	9.43218	86.5505	1.56082e-20	3.48763e-19
Wdr83os	-0.479336	9.37932	111.382	1.59382e-20	3.5585e-19
Limd2	-0.584152	9.28422	144.085	1.67222e-20	3.73058e-19
Smim11	-0.472548	9.39193	109.391	1.83098e-20	4.0815e-19
0610007P14Rik	-0.505367	9.29792	150.099	1.8429e-20	4.10482e-19
Slc39a14	0.435068	9.2591	185.392	1.84788e-20	4.11263e-19
R3hdm4	-0.547723	9.32126	140.355	1.96052e-20	4.35985e-19
Sdf4	-0.478296	9.38739	106.418	2.02001e-20	4.48859e-19
Rab11fip4	-0.483611	9.22386	331.644	2.16136e-20	4.79886e-19
Cox6c	-0.211692	11.8388	85.5149	2.62665e-20	5.82732e-19
Maz	-0.522925	9.26017	198.653	2.67424e-20	5.92821e-19
Gnb4	0.299612	9.19248	1027.06	2.67961e-20	5.93542e-19
Timm13	-0.329297	10.0386	85.4626	2.69666e-20	5.96847e-19
Ddb1	-0.492763	9.3744	112.244	2.75016e-20	6.08208e-19
Mrps23	-0.533055	9.31001	146.393	2.87269e-20	6.34803e-19
mt-Nd3	0.275963	11.1198	85.2784	2.95823e-20	6.5319e-19
Aftph	0.435593	9.31693	129.718	3.28827e-20	7.25493e-19
Actr1b	-0.534822	9.29531	156.325	3.34591e-20	7.37627e-19
Mgrn1	-0.571813	9.31388	147.088	3.49068e-20	7.68482e-19
Tesc	-0.547773	9.26411	176.871	3.49135e-20	7.68482e-19
Serpinb9	0.399171	9.27366	145.956	3.50862e-20	7.7135e-19
Pde4d	-0.867611	9.44913	100.255	3.5099e-20	7.7135e-19
Arf5	-0.392162	9.64858	84.9229	3.53708e-20	7.76715e-19
Tuba4a	-0.516191	9.38264	111.902	3.76137e-20	8.2532e-19
Slc22a6	-0.796951	9.85214	84.7736	3.81279e-20	8.35947e-19
Gnb1	-0.428746	9.53599	84.7544	3.84983e-20	8.43408e-19
Bola2	-0.3905	9.62704	84.6607	4.03559e-20	8.83412e-19
Ndufv2	-0.385718	9.74339	84.6226	4.11348e-20	8.9976e-19
Atp6v0d1	-0.489615	9.36799	112.034	4.25346e-20	9.29652e-19
Yif1a	-0.484889	9.36246	115.403	4.43643e-20	9.68885e-19
Akr1c21	0.328987	10.6889	84.4088	4.58032e-20	9.99532e-19
mt-Nd6	0.372706	9.32079	132.534	4.76503e-20	1.03903e-18
Rbms1	0.422848	9.34032	107.287	4.97818e-20	1.08466e-18
Aph1a	-0.543661	9.31091	145.227	5.23299e-20	1.13929e-18
Idi1	0.354987	9.27264	169.604	5.36266e-20	1.16662e-18
Ptdss2	-0.557245	9.27522	178.215	5.54621e-20	1.20561e-18
Nr1h3	-0.539821	9.2682	177.959	5.55962e-20	1.20759e-18
Rpl41	-0.195736	12.2954	83.7976	6.22823e-20	1.35177e-18
Snrpe	-0.411989	9.51927	83.7779	6.28999e-20	1.36412e-18
Adck3	-0.581197	9.30612	149.872	6.3716e-20	1.38074e-18
Prosc	-0.486293	9.36414	111.312	6.42015e-20	1.39019e-18
Blvrb	-0.522539	9.28897	149.601	6.58412e-20	1.42459e-18
Il11ra1	-0.560415	9.28858	163.414	6.65981e-20	1.43986e-18
Hoxa9	-0.539927	9.30315	146.921	6.68342e-20	1.44292e-18
Eif4b	-0.471811	9.4193	97.1968	6.68427e-20	1.44292e-18
Ewsr1	-0.445946	9.44362	94.1969	6.89611e-20	1.4875e-18
Zmat5	-0.505982	9.29369	149.729	6.9905e-20	1.5067e-18
Fam173a	-0.508664	9.34935	122.464	7.02101e-20	1.51211e-18
Myl12b	-0.425953	9.48983	83.5519	7.04732e-20	1.51661e-18
Ypel2	0.438756	9.27358	157.791	8.13664e-20	1.74969e-18
Prkcsh	-0.509113	9.31201	137.028	8.15196e-20	1.75164e-18
Lhx1	-0.640132	9.26758	176.842	8.42765e-20	1.80949e-18
Pxmp4	-0.463621	9.46487	86.0996	8.70883e-20	1.86843e-18
Slc27a1	-0.539832	9.27248	177.653	8.73603e-20	1.87283e-18
Spns2	-0.479814	9.23275	260.5	8.92943e-20	1.91283e-18
Banf1	-0.46691	9.37491	106.141	8.99709e-20	1.92585e-18
Rps12-ps3	-0.466558	9.42701	93.353	9.10913e-20	1.94834e-18
Tmbim6	-0.321865	10.2529	82.9391	9.59052e-20	2.04973e-18
Cd69	0.360003	9.20555	457.306	9.67243e-20	2.06566e-18
Ube2a	-0.454746	9.41579	97.7671	9.74185e-20	2.0789e-18
Nenf	-0.418841	9.4834	85.0369	1.18359e-19	2.52385e-18
Mplkip	-0.49902	9.26285	181.548	1.19538e-19	2.54704e-18
Eif3i	-0.493433	9.41396	101.909	1.32896e-19	2.82952e-18
Ssna1	-0.493426	9.33997	121.931	1.37405e-19	2.92167e-18
Tram1	-0.46123	9.43289	96.1011	1.37433e-19	2.92167e-18
Impa1	-0.507948	9.32674	126.743	1.40236e-19	2.979e-18
Oat	-0.456558	9.53634	82.0659	1.48793e-19	3.15839e-18
Bend5	-0.571354	9.24443	229.444	1.57818e-19	3.34742e-18
Tmem109	-0.481537	9.24238	224.015	1.59224e-19	3.37468e-18
Gm15056	0.129371	9.18402	3031.84	1.66705e-19	3.53057e-18
Smco4	-0.506501	9.32071	124.388	1.66969e-19	3.53168e-18
Rab20	0.424037	9.30138	133.654	1.6701e-19	3.53168e-18
Epb41l5	-0.58487	9.31669	139.699	1.71828e-19	3.63081e-18
Sdha	-0.37388	9.81617	81.7628	1.73298e-19	3.65913e-18
Alkbh7	-0.510047	9.25948	191.259	1.86919e-19	3.94374e-18
Arhgef1	-0.568433	9.26878	181.224	1.89541e-19	3.99606e-18
Fads3	-0.50465	9.28881	149.096	1.98224e-19	4.17597e-18
Car2	-0.485418	9.75479	81.3804	2.1006e-19	4.42201e-18
Wdfy3	-0.545326	9.34548	119.944	2.10309e-19	4.42392e-18
Dnmt3a	-0.544668	9.25987	194.372	2.13548e-19	4.48868e-18
Fbp1	-0.403235	10.1257	81.3377	2.14618e-19	4.50779e-18
Ube2r2	-0.464691	9.44432	93.267	2.2239e-19	4.66753e-18
Nedd4l	0.435035	9.26507	167.506	2.38063e-19	4.99273e-18
Psmb6	-0.374469	9.66396	81.1071	2.41028e-19	5.05112e-18
Dhrs3	-0.574111	9.37792	113.199	2.48651e-19	5.20697e-18
Mecom	-0.560022	9.31224	118.575	2.51933e-19	5.27176e-18
Slc37a4	-0.474864	9.46321	85.4637	2.5994e-19	5.43524e-18
Paqr5	-0.453309	9.44094	80.9427	2.61805e-19	5.47015e-18
Rnf135	0.382562	9.20837	415.436	2.65763e-19	5.54873e-18
Crocc	-0.535798	9.22874	292.577	2.70405e-19	5.64142e-18
Kxd1	-0.505821	9.42063	101.316	2.72421e-19	5.67925e-18
Jak2	0.401341	9.21733	317.321	2.82911e-19	5.89356e-18
Bcar1	-0.517927	9.25466	198.343	2.84119e-19	5.91432e-18
Rtfdc1	-0.501568	9.28334	155.813	2.99043e-19	6.22035e-18
Myo1b	0.304459	9.19485	808.294	3.04713e-19	6.33359e-18
Rgs5	0.313899	9.20114	508.983	3.16226e-19	6.56802e-18
Pitpna	-0.509978	9.32905	119.265	3.22138e-19	6.68585e-18
Cnppd1	-0.51769	9.29281	149.65	3.2594e-19	6.75975e-18
Slc16a10	-0.48908	9.24209	219.916	3.28235e-19	6.80232e-18
Ndufb6	-0.32774	10.0059	80.2673	3.67769e-19	7.61598e-18
Oas2	0.234153	9.18828	1691.54	3.73938e-19	7.738e-18
Ddost	-0.495459	9.31104	131.666	3.80865e-19	7.87552e-18
Crat	-0.564596	9.30414	146.959	3.84658e-19	7.94808e-18
Tmem60	-0.483719	9.29958	137.69	3.92001e-19	8.09385e-18
Frrs1	-0.589059	9.33754	124.414	3.98005e-19	8.21175e-18
Slc12a3	-0.627484	9.80159	80.0597	4.08263e-19	8.4172e-18
Sgta	-0.52362	9.30476	141.364	4.25243e-19	8.76082e-18
Atp5c1	-0.320139	10.1225	79.932	4.35362e-19	8.9627e-18
Cdo1	-0.497393	9.36993	92.9923	4.41e-19	9.07209e-18
Smim6	-0.421785	9.22016	292.575	4.48428e-19	9.21812e-18
Lilrb4a	0.269067	9.21483	358.336	4.50215e-19	9.24808e-18
Txndc5	-0.520717	9.25229	200.687	4.52525e-19	9.28871e-18
Slc38a10	-0.518355	9.27476	163.788	4.77691e-19	9.7981e-18
Mat2b	-0.444037	9.40306	96.4088	5.13726e-19	1.05295e-17
Ppm1h	-0.518466	9.35609	111.448	5.74698e-19	1.17706e-17
Sdf2	-0.489663	9.33252	119.038	5.89719e-19	1.20694e-17
Khk	-0.391852	10.1441	79.3189	5.92733e-19	1.21222e-17
Dgat2	-0.60368	9.37545	110.837	6.35121e-19	1.29797e-17
Capg	-0.606166	9.27442	150.132	6.49822e-19	1.32704e-17
Adamts4	0.171306	9.1854	2747.55	6.53933e-19	1.33446e-17
Fam84b	0.424305	9.27701	149.709	6.59557e-19	1.34496e-17
Bcl2	-0.528256	9.2558	180.342	6.81115e-19	1.38791e-17
Gm8237	0.139201	9.18407	3160.74	6.91916e-19	1.40793e-17
Bpifc	0.14884	9.18407	5839.48	6.91947e-19	1.40793e-17
Calb1	-0.644267	9.96866	78.9328	7.19841e-19	1.46362e-17
Slfn9	0.156867	9.18419	4670.76	7.37414e-19	1.49827e-17
Eif1b	-0.468894	9.36328	106.792	7.78617e-19	1.58084e-17
Hsd17b4	-0.493776	9.36806	107.302	8.22514e-19	1.66875e-17
Actn4	-0.468388	9.44262	90.6711	8.23887e-19	1.67032e-17
Cyp2u1	-0.391215	9.21416	359.598	8.80154e-19	1.78311e-17
Ddx3x	0.348554	9.58584	78.4966	8.96597e-19	1.81511e-17
Gm13889	0.262503	9.19194	1031.51	9.53176e-19	1.92825e-17
Lrrc58	-0.425343	9.51372	78.3249	9.77571e-19	1.97618e-17
Vdac1	-0.377294	9.8863	78.177	1.0531e-18	2.12732e-17
Polr2m	-0.473706	9.42541	94.8488	1.06188e-18	2.14352e-17
Ppp1cb	-0.407866	9.49322	78.115	1.08651e-18	2.19165e-17
Dpp3	-0.459777	9.23559	234.965	1.10682e-18	2.23101e-17
Gsn	-0.459474	9.236	212.823	1.18061e-18	2.37804e-17
Rnf125	0.221016	9.18685	2141.23	1.26034e-18	2.53681e-17
Aldh2	-0.39783	9.72767	77.7841	1.2835e-18	2.58156e-17
Pabpc1	-0.406472	9.68276	77.7418	1.31111e-18	2.63522e-17
Lrp10	-0.492845	9.33596	116.393	1.32443e-18	2.66008e-17
Oas3	0.228704	9.18895	1544.87	1.41736e-18	2.84468e-17
Lgals1	-0.475179	9.64235	77.5732	1.42724e-18	2.86245e-17
Tnip1	0.393387	9.22032	282.174	1.49219e-18	2.99058e-17
Lmo4	-0.458496	9.4453	83.3638	1.50843e-18	3.02096e-17
Usp53	0.43034	9.25755	165.042	1.62783e-18	3.25775e-17
Cda	-0.394762	9.94605	77.2917	1.64461e-18	3.28899e-17
Med25	-0.508571	9.28881	146.618	1.66553e-18	3.32845e-17
Mast4	0.426741	9.27263	150.828	1.67161e-18	3.33821e-17
Pard6b	-0.470229	9.23781	225.837	1.69275e-18	3.37802e-17
Sec13	-0.482937	9.31232	127.106	1.70205e-18	3.39417e-17
Tmem205	-0.43172	9.64492	77.1657	1.75233e-18	3.49194e-17
Rdh14	-0.496165	9.29308	140.031	1.79315e-18	3.57074e-17
Bola1	-0.447848	9.36781	100.295	1.87193e-18	3.72498e-17
Card10	-0.50768	9.24229	217.777	1.90736e-18	3.79277e-17
Xpnpep1	-0.543673	9.31219	131.228	1.91369e-18	3.80266e-17
Mff	-0.461688	9.42068	92.6448	1.93006e-18	3.83248e-17
Lamtor4	-0.378079	9.66582	76.9449	1.95841e-18	3.886e-17
Creb3l2	-0.523525	9.2569	185.19	1.98657e-18	3.93909e-17
Sgpp1	-0.524342	9.37968	102.338	2.02538e-18	4.0132e-17
Mrpl18	-0.429403	9.5158	77.0843	2.0454e-18	4.05e-17
Rgs1	0.358346	9.21243	300.674	2.05109e-18	4.05841e-17
Tmem259	-0.519362	9.31644	128.368	2.07097e-18	4.09484e-17
Pdcd5	-0.384121	9.52002	76.7862	2.12131e-18	4.19142e-17
Slc25a23	-0.543492	9.27671	160.001	2.133e-18	4.21155e-17
Snrpa	-0.497745	9.27458	157.364	2.18033e-18	4.30196e-17
Hap1	0.262136	9.19114	1113.94	2.26401e-18	4.46392e-17
Sap30	-0.469879	9.39416	90.8853	2.39339e-18	4.7157e-17
Vamp2	-0.504097	9.29138	140.989	2.50149e-18	4.92524e-17
Ptrhd1	-0.473748	9.32576	117.446	2.5397e-18	4.99694e-17
Sac3d1	-0.419338	9.22349	276.898	2.63112e-18	5.17319e-17
Kdelr1	-0.487768	9.35912	108.867	2.67905e-18	5.26373e-17
Gga2	-0.549708	9.2674	173.073	2.70685e-18	5.31461e-17
Zranb2	-0.523867	9.33452	118.977	2.7237e-18	5.34395e-17
Guca2b	-0.382175	11.4261	76.2817	2.73499e-18	5.36234e-17
Mrpl14	-0.371648	9.62808	76.2473	2.78273e-18	5.45212e-17
Cnpy2	-0.416098	9.46816	81.745	2.83691e-18	5.55439e-17
Pink1	-0.47575	9.43339	92.3834	2.92121e-18	5.71545e-17
Coro1b	-0.515808	9.28167	148.827	2.93345e-18	5.73539e-17
Ptp4a1	0.364533	9.44025	78.512	2.96858e-18	5.80002e-17
Psmb1	-0.372095	9.63126	76.0863	3.01786e-18	5.89219e-17
Cox6b2	-0.568269	9.26768	164.826	3.11125e-18	6.07029e-17
Lppos	-0.558092	9.26441	176.318	3.12033e-18	6.08378e-17
Slmo2	-0.476545	9.29584	132.649	3.14604e-18	6.12964e-17
Maf1	-0.47561	9.35837	107.853	3.20582e-18	6.24177e-17
Gabarapl2	-0.360795	9.66181	75.864	3.3754e-18	6.56736e-17
Snrpf	-0.393131	9.49146	75.7625	3.55247e-18	6.90708e-17
Tinag	-0.505813	9.35892	106.119	3.58048e-18	6.95671e-17
Sod1	-0.408266	9.72532	75.719	3.63111e-18	7.0502e-17
Adgrf5	0.429632	9.25001	147.757	3.77838e-18	7.33104e-17
Pcbp4	-0.487725	9.24718	201.225	3.86951e-18	7.50266e-17
Tcf25	-0.451365	9.44088	87.5953	3.92544e-18	7.60585e-17
Zfp688	-0.377188	9.21456	333.554	3.97217e-18	7.69107e-17
Gjb1	-0.512459	9.25615	182.797	4.06057e-18	7.8568e-17
Laptm5	-0.583422	9.25496	169.457	4.14146e-18	8.00777e-17
Mrpl40	-0.4752	9.29496	134.711	4.17195e-18	8.06116e-17
H2afv	-0.387962	9.53974	75.1356	4.87174e-18	9.40682e-17
Trem1	0.235444	9.19341	802.25	5.09695e-18	9.83246e-17
Ei24	-0.480276	9.33839	111.539	5.0992e-18	9.83246e-17
Imp3	-0.498926	9.30855	128.794	5.48928e-18	1.05773e-16
Sema4c	0.254099	9.19456	850.373	5.55637e-18	1.06993e-16
Sirt7	-0.525853	9.2812	152.181	5.74257e-18	1.10502e-16
D5Ertd579e	0.40918	9.30767	119.538	5.79954e-18	1.11522e-16
Herpud1	0.339933	9.64457	74.7321	5.96984e-18	1.14718e-16
Il34	0.389997	9.22753	238.346	6.00865e-18	1.15384e-16
Rexo2	-0.405501	9.43654	81.0697	6.06565e-18	1.16399e-16
Erlin1	-0.620613	9.29476	145.627	6.11285e-18	1.17224e-16
B230219D22Rik	-0.510678	9.33628	114.705	6.16434e-18	1.18131e-16
Dst	-0.488494	9.37432	91.9725	6.31997e-18	1.2103e-16
Elof1	-0.424543	9.43147	86.0766	6.35022e-18	1.21527e-16
Mydgf	-0.480535	9.34856	107.856	6.45933e-18	1.2353e-16
Sdhb	-0.322754	10.0102	74.5666	6.48899e-18	1.24013e-16
Surf4	-0.465149	9.36301	101.585	6.50804e-18	1.24292e-16
Amn	-0.513505	9.38195	96.465	6.52856e-18	1.24599e-16
Scamp3	-0.506928	9.28185	149.834	6.56808e-18	1.25268e-16
Ergic3	-0.471202	9.38594	99.121	6.66502e-18	1.2703e-16
Osbpl6	-0.644072	9.35942	110.844	7.04145e-18	1.34113e-16
Casp7	0.35536	9.20968	362.917	7.2005e-18	1.37049e-16
Emc7	-0.451066	9.37662	97.6494	7.2805e-18	1.38478e-16
Rela	0.416537	9.23287	213.027	7.65662e-18	1.45533e-16
Cd86	0.246369	9.18904	1318.19	7.71601e-18	1.46562e-16
Mark2	-0.51558	9.32179	122.586	8.17378e-18	1.55152e-16
Slc22a23	-0.482994	9.24292	203.044	8.46191e-18	1.60512e-16
Spp1	0.387917	12.443	74.0366	8.4753e-18	1.60658e-16
Smpd1	-0.504931	9.27786	151.189	8.65679e-18	1.63987e-16
Sorbs1	0.361382	9.20476	426.296	8.70249e-18	1.64741e-16
Ndufb8	-0.271602	10.3325	73.9648	8.78749e-18	1.66238e-16
Cutal	-0.483481	9.2525	181.755	8.79548e-18	1.66277e-16
Ifi30	-0.529452	9.27071	145.765	8.85936e-18	1.67371e-16
Zfp467	-0.52435	9.29817	133.801	9.14694e-18	1.72688e-16
Nedd4	-0.450174	9.37917	95.0939	9.22988e-18	1.74136e-16
Peli1	0.415011	9.26851	144.667	9.25475e-18	1.74488e-16
Copa	-0.405682	9.45595	77.1743	9.51765e-18	1.79324e-16
Jak1	0.392074	9.35245	97.1602	9.58942e-18	1.80555e-16
Dhcr24	-0.487271	9.42727	82.043	9.61096e-18	1.80839e-16
Dctn2	-0.469813	9.34196	109.908	9.73223e-18	1.82997e-16
Spag7	-0.459841	9.34251	107.322	1.02243e-17	1.92121e-16
Vdr	-0.505167	9.41662	87.0598	1.08357e-17	2.03473e-16
Slc10a6	0.175139	9.18517	2671.89	1.14338e-17	2.14561e-16
Ubc	-0.318193	10.1874	73.4373	1.14637e-17	2.14976e-16
Cfb	0.389967	9.31852	109.057	1.15348e-17	2.16166e-16
Tcta	-0.458964	9.24378	197.963	1.15871e-17	2.17e-16
Fcgr1	0.250109	9.19189	974.861	1.16071e-17	2.1723e-16
Arhgef2	-0.48836	9.25622	175.614	1.16735e-17	2.18327e-16
Fmo5	0.255255	9.27653	139.315	1.18678e-17	2.21813e-16
Timm17a	-0.374698	9.57779	73.3644	1.18929e-17	2.22133e-16
Bcl7a	-0.515836	9.34163	110.939	1.20496e-17	2.24909e-16
Cfap20	-0.470616	9.2504	184.075	1.21147e-17	2.25973e-16
Atp2a2	-0.410788	9.61971	73.292	1.23345e-17	2.2992e-16
Spcs2	-0.398109	9.45473	76.0189	1.28618e-17	2.39591e-16
Ssbp3	-0.487541	9.26719	158.626	1.28889e-17	2.39936e-16
Slc16a13	-0.505928	9.25325	181.912	1.29939e-17	2.41729e-16
Cwh43	-0.544286	9.25435	161.728	1.31435e-17	2.4435e-16
Canx	-0.369207	9.80736	73.137	1.33367e-17	2.47778e-16
Il1r2	0.287192	9.20509	423.201	1.36069e-17	2.5263e-16
Slc6a18	-0.509556	9.51199	73.087	1.36776e-17	2.53775e-16
Selk	-0.327718	9.85773	73.0415	1.39946e-17	2.59485e-16
Tmed4	-0.46681	9.34981	105.317	1.41567e-17	2.62317e-16
Sct	0.20832	9.18939	1430.57	1.41804e-17	2.62581e-16
Top3b	-0.522999	9.2573	173.524	1.4403e-17	2.66527e-16
Kpnb1	-0.48122	9.27966	143.42	1.44287e-17	2.66826e-16
Usp2	-0.643113	9.42729	93.3618	1.54049e-17	2.8469e-16
Nucks1	-0.43234	9.40713	86.0474	1.54268e-17	2.84907e-16
Setdb2	0.336213	9.20192	475.608	1.58109e-17	2.91809e-16
Slc13a3	-0.959139	9.63968	72.7558	1.61627e-17	2.98106e-16
Fam107b	-0.517338	9.33417	110.978	1.6279e-17	3.00053e-16
Idh3b	-0.458331	9.47099	85.4339	1.72377e-17	3.17514e-16
Rab14	-0.389678	9.58067	72.6256	1.72587e-17	3.17692e-16
Rpp21	-0.410945	9.42976	82.528	1.73714e-17	3.19556e-16
Ctsz	-0.438148	9.45362	72.5974	1.75058e-17	3.21817e-16
D8Ertd738e	-0.3007	9.99713	72.5728	1.77244e-17	3.25623e-16
Cmtm4	-0.487268	9.29112	133.853	1.81272e-17	3.32803e-16
Ctbp1	-0.471063	9.35261	103.374	1.81969e-17	3.33864e-16
Tsen34	-0.470821	9.31102	120.305	1.93266e-17	3.54359e-16
Polr2l	0.318213	9.69815	72.3692	1.96402e-17	3.59873e-16
Scd2	-0.470623	9.34237	80.8763	1.97256e-17	3.61201e-16
Upf3b	-0.49817	9.27042	156.541	2.00255e-17	3.66454e-16
2020-03-02	-0.448896	9.37538	95.3496	2.0786e-17	3.80122e-16
Ubxn1	-0.397661	9.48972	77.047	2.16383e-17	3.9545e-16
Pgp	-0.475039	9.30545	122.491	2.18742e-17	3.995e-16
Arf4	0.343734	9.50246	72.069	2.28492e-17	4.17036e-16
Acadm	-0.379178	9.9123	72.0567	2.29919e-17	4.19366e-16
Cops7a	-0.499056	9.30377	128.492	2.327e-17	4.24163e-16
Zbtb7b	-0.478444	9.24904	185.56	2.40798e-17	4.38638e-16
Sdc1	0.360864	9.20715	375.7	2.6188e-17	4.76731e-16
Mycbp2	0.386274	9.31048	114.289	2.68134e-17	4.87798e-16
Elovl1	-0.499168	9.31635	118.943	2.77552e-17	5.04605e-16
Taz	-0.493761	9.28751	136.02	2.79667e-17	5.08119e-16
Rnf152	-0.528512	9.28262	137.463	2.86141e-17	5.19545e-16
Lgals4	-0.497955	9.23133	255.627	2.94599e-17	5.34555e-16
Josd2	-0.490352	9.28807	135.969	2.95799e-17	5.36385e-16
Usp20	-0.494947	9.23907	211.259	3.04511e-17	5.51825e-16
Sec62	-0.361342	9.82572	71.4121	3.18211e-17	5.76279e-16
Pyurf	-0.489682	9.39185	93.4622	3.22885e-17	5.84201e-16
Phlda2	-0.592499	9.26308	163.495	3.23003e-17	5.84201e-16
Atp5f1	-0.303032	10.0671	71.2	3.54127e-17	6.40081e-16
Arpc4	-0.464061	9.35951	92.4112	3.72032e-17	6.7201e-16
Casp1	0.265293	9.19319	863.476	3.75563e-17	6.77951e-16
Rbpms2	-0.485677	9.42588	81.4674	4.00161e-17	7.21889e-16
Pfdn6	-0.430169	9.38591	90.7636	4.08995e-17	7.3735e-16
Emp3	-0.547743	9.28943	108.465	4.23805e-17	7.63557e-16
Ssbp1	-0.459188	9.33071	108.573	4.25876e-17	7.66796e-16
Ing2	-0.502992	9.2616	164.447	4.34807e-17	7.82373e-16
Srsf9	-0.472835	9.30728	118.179	4.39496e-17	7.90302e-16
Uqcc3	-0.395673	9.47219	77.0687	4.48443e-17	8.05874e-16
Serpina10	0.167506	9.19111	1177.72	4.52512e-17	8.12663e-16
Lima1	0.358475	9.32308	106.43	4.61892e-17	8.28977e-16
Cct2	-0.463364	9.33835	104.483	4.74198e-17	8.50519e-16
Pkhd1	-0.566222	9.3614	102.417	4.78774e-17	8.58176e-16
Hlf	-0.790454	9.33713	118.076	5.05394e-17	9.05312e-16
Hp1bp3	-0.474519	9.31475	115.561	5.06588e-17	9.06871e-16
Pah	0.254359	9.88614	70.4653	5.12949e-17	9.1767e-16
Plekhj1	-0.458972	9.33031	106.767	5.20903e-17	9.31306e-16
Ndufb5	-0.308781	9.98929	70.4048	5.28862e-17	9.44932e-16
Slc35c2	-0.447012	9.23088	230.491	5.69167e-17	1.0163e-15
Sox12	-0.290989	9.20146	522.406	5.78597e-17	1.03248e-15
Vldlr	-0.547237	9.30662	123.785	5.84931e-17	1.04312e-15
Oas1g	0.222312	9.18885	1392.99	5.9031e-17	1.05204e-15
Ankrd40	-0.492729	9.27563	144.362	6.15234e-17	1.09576e-15
Lrpprc	-0.511159	9.28519	138.233	6.27669e-17	1.1172e-15
Mprip	-0.496138	9.32138	113.94	6.29667e-17	1.12004e-15
Pfkl	-0.444237	9.23774	203.04	6.41811e-17	1.14092e-15
Coa5	-0.477329	9.31611	114.718	6.54467e-17	1.16268e-15
Tmem64	-0.522141	9.34908	101.092	6.66924e-17	1.18406e-15
Slc35g1	-0.415345	9.23151	204.578	6.74822e-17	1.19732e-15
Snrpb	-0.375951	9.52448	69.908	6.79448e-17	1.20476e-15
Trps1	0.276806	9.41392	80.288	7.02596e-17	1.24502e-15
Gcgr	-0.446135	9.22775	235.868	7.28632e-17	1.29034e-15
Ddit4l	-0.389537	9.21987	264.243	7.4966e-17	1.32674e-15
Npnt	-0.507816	9.36258	81.9707	7.54809e-17	1.33501e-15
Pvalb	-0.585857	9.29188	101.041	7.56482e-17	1.33712e-15
Phf5a	-0.44651	9.32229	108.623	7.60311e-17	1.34304e-15
Tpra1	-0.440668	9.23012	231.789	7.85869e-17	1.38731e-15
Gnai2	-0.455377	9.4349	72.3167	8.15687e-17	1.43904e-15
Dctn3	-0.383113	9.48747	73.9124	8.16377e-17	1.43935e-15
Gmpr	-0.440666	9.35318	94.6383	8.31106e-17	1.4644e-15
Dvl1	-0.491978	9.26632	154.839	8.37472e-17	1.47469e-15
Irf2bpl	0.379833	9.3426	86.0354	8.53682e-17	1.50229e-15
Fam96a	-0.401932	9.46106	73.184	8.76842e-17	1.54207e-15
Atp6v1g1	-0.283671	10.3236	69.3581	8.96679e-17	1.57597e-15
Cit	-0.462561	9.21982	291.417	9.05792e-17	1.59099e-15
Pam16	-0.401153	9.44469	77.9384	1.00004e-16	1.75543e-15
Rpa1	-0.394101	9.21972	272.769	1.01175e-16	1.77487e-15
Gm15563	0.0990016	9.19114	797.568	1.01287e-16	1.77572e-15
Smim12	-0.461766	9.31271	114.165	1.04568e-16	1.8321e-15
Xpo1	-0.47386	9.26346	153.279	1.05099e-16	1.84025e-15
Slc29a3	-0.538296	9.27874	142.883	1.05785e-16	1.8511e-15
Cxadr	0.410211	9.25445	151.334	1.07627e-16	1.88216e-15
Mgat4b	-0.490531	9.2898	130.051	1.10373e-16	1.92897e-15
S100a4	-0.676659	9.2724	124.728	1.10658e-16	1.93276e-15
Bmp4	-0.523237	9.25889	163.919	1.11065e-16	1.93866e-15
Arl6ip4	-0.463562	9.31215	113.85	1.11778e-16	1.94989e-15
1500011K16Rik	-0.396001	9.48467	72.5615	1.12823e-16	1.96689e-15
Cyp2d22	-0.475351	9.22749	264.282	1.16353e-16	2.02716e-15
Rps27rt	-0.348204	9.76219	68.8384	1.16553e-16	2.02938e-15
Tfam	-0.485476	9.26834	151.392	1.18803e-16	2.06728e-15
Il13ra1	0.409816	9.27979	125.556	1.20846e-16	2.10151e-15
Pycrl	-0.498312	9.28036	138.29	1.24911e-16	2.17087e-15
Pck1	-0.391359	11.0564	68.6767	1.26461e-16	2.19644e-15
Spr	-0.426625	9.52233	70.8988	1.29555e-16	2.24878e-15
Dnajc4	-0.463407	9.25902	159.364	1.34833e-16	2.33894e-15
Btd	-0.45351	9.24365	185.868	1.46537e-16	2.5404e-15
Mien1	-0.362071	9.68113	68.3465	1.49387e-16	2.5882e-15
S100a16	-0.444046	9.35788	88.7214	1.53724e-16	2.6617e-15
Carkd	-0.463858	9.29313	124.386	1.57188e-16	2.71999e-15
Gltscr2	-0.434917	9.41542	80.6543	1.57741e-16	2.72789e-15
Rhcg	-0.512122	9.30066	96.7743	1.5833e-16	2.73637e-15
Uqcrc2	-0.402561	9.52704	71.3453	1.60461e-16	2.7715e-15
Mdp1	-0.470964	9.29781	122.893	1.61031e-16	2.77962e-15
Mrpl50	-0.405809	9.41496	78.6342	1.61842e-16	2.79189e-15
Fam195b	-0.457059	9.32696	106.735	1.69876e-16	2.92869e-15
Atp1b1	-0.318267	11.0284	68.0468	1.73781e-16	2.99416e-15
Urm1	-0.470989	9.25168	172.009	1.75498e-16	3.02189e-15
Clptm1l	-0.462032	9.30361	117.267	1.79982e-16	3.09556e-15
Ssr2	-0.426887	9.36274	89.7192	1.79998e-16	3.09556e-15
Papd7	0.352574	9.22099	249.86	1.8254e-16	3.13736e-15
Tmed3	-0.478475	9.29155	125.596	1.83375e-16	3.14978e-15
Gpat4	-0.471693	9.26692	149.238	1.90462e-16	3.26951e-15
Ces1d	-0.513608	9.40845	81.4452	1.92464e-16	3.30184e-15
Ndufb10	-0.298179	10.0958	67.8255	1.94315e-16	3.33156e-15
Akr1c19	-0.447627	9.24562	170.027	2.11454e-16	3.6232e-15
2210011C24Rik	-0.547791	9.25295	175.342	2.18339e-16	3.73886e-15
Spg21	-0.456416	9.29667	120.644	2.20276e-16	3.76974e-15
Tmem53	-0.476172	9.25963	158.725	2.25911e-16	3.8638e-15
Rhoa	-0.347639	9.71333	67.5054	2.28389e-16	3.90148e-15
Ttc36	0.254739	10.7158	67.5054	2.28392e-16	3.90148e-15
Lyz2	-0.797238	9.72499	67.4885	2.30355e-16	3.9326e-15
Fkbp2	-0.356355	9.59362	67.4557	2.34199e-16	3.9958e-15
Epn3	-0.404859	9.22598	227.48	2.37292e-16	4.04611e-15
Faap20	-0.454414	9.29271	122.805	2.42771e-16	4.137e-15
Med21	0.346134	9.41452	72.5966	2.49026e-16	4.24102e-15
Copz1	-0.461073	9.34064	99.848	2.51184e-16	4.27516e-15
Inmt	0.272286	9.76729	67.2635	2.58056e-16	4.38946e-15
Nap1l1	-0.414719	9.44362	73.2045	2.62401e-16	4.46065e-15
Malat1	0.444346	15.9535	67.2249	2.63131e-16	4.47035e-15
Cldn7	0.386221	9.26759	118.786	2.65069e-16	4.50054e-15
S100g	-0.577333	11.7962	67.1304	2.75994e-16	4.68321e-15
Ptov1	-0.468344	9.30624	115.457	2.91274e-16	4.93948e-15
Stard4	-0.519808	9.26078	157.393	2.96538e-16	5.0257e-15
Ciita	0.197653	9.18733	1667.77	2.96885e-16	5.02855e-15
Mrpl27	-0.395925	9.44725	75.186	3.00573e-16	5.08793e-15
Rnf149	-0.420176	9.38476	79.4242	3.01691e-16	5.10377e-15
Sco2	-0.414447	9.22823	224.575	3.10555e-16	5.25055e-15
Ctf1	-0.328755	9.20724	379.835	3.20852e-16	5.42138e-15
Ywhae	-0.338704	9.70278	66.7804	3.29331e-16	5.56129e-15
Prkar1a	-0.373878	9.47371	66.7363	3.36739e-16	5.68296e-15
Cmpk1	-0.355391	9.58291	66.7216	3.39258e-16	5.72202e-15
Dctpp1	-0.454649	9.32179	106.021	3.45145e-16	5.8178e-15
Fam104a	-0.397212	9.43762	75.0819	3.61199e-16	6.08474e-15
Rap1gap2	-0.387654	9.21674	284.431	3.68879e-16	6.21038e-15
H2afz	-0.346862	9.93608	66.5483	3.70285e-16	6.23032e-15
Iqsec1	-0.481871	9.26295	150.827	3.83634e-16	6.45104e-15
Slc50a1	-0.436286	9.23881	189.499	3.8695e-16	6.5029e-15
Celsr2	-0.50062	9.30028	116.463	3.97768e-16	6.68013e-15
Man2b1	-0.520308	9.30044	119.515	3.97973e-16	6.68013e-15
0610011F06Rik	-0.363024	9.77019	66.3532	4.08611e-16	6.85458e-15
Add3	-0.516857	9.29106	124.982	4.10297e-16	6.87874e-15
Atp5o	-0.282324	10.1914	66.3028	4.19141e-16	7.02281e-15
Whamm	0.370662	9.2214	239.615	4.26899e-16	7.14851e-15
PISD	-0.534646	9.38078	89.4352	4.3063e-16	7.20668e-15
Pygb	-0.362895	9.21577	278.586	4.39178e-16	7.34534e-15
Dnajc12	0.265045	9.68498	66.2084	4.39604e-16	7.34809e-15
Vapb	-0.478469	9.34105	100.972	4.49205e-16	7.50408e-15
Stx4a	-0.493284	9.29071	125.182	4.75978e-16	7.94659e-15
Csk	-0.455145	9.24606	171.647	4.98231e-16	8.31315e-15
Rer1	-0.356818	9.57059	65.9408	5.03223e-16	8.39144e-15
Naa38	-0.353443	9.59651	65.7919	5.42501e-16	9.04104e-15
Hoxd3os1	-0.444484	9.29102	112.74	5.44059e-16	9.06162e-15
Aurkaip1	-0.359808	9.53625	65.7738	5.47487e-16	9.11328e-15
Slpi	0.0825684	9.27997	102.627	5.57475e-16	9.27402e-15
Dnajc3	-0.426869	9.39881	81.0274	5.72082e-16	9.51138e-15
Gtf3a	-0.505836	9.3046	118.338	5.8895e-16	9.78601e-15
Arrb2	-0.334891	9.20792	361.023	6.05347e-16	1.00525e-14
Taf6l	-0.446551	9.3245	102.579	6.161e-16	1.0225e-14
Aamp	-0.415125	9.4021	81.0312	6.31045e-16	1.04668e-14
Bckdha	-0.404197	9.47807	71.595	6.32244e-16	1.04805e-14
Hnrnpab	-0.367647	9.47418	65.482	6.34423e-16	1.05073e-14
Dhrs4	-0.416111	9.56916	65.4814	6.3461e-16	1.05073e-14
Sumo1	0.309933	9.64822	65.4521	6.44068e-16	1.06576e-14
BC094916	0.164152	9.18561	2677.8	6.47975e-16	1.07159e-14
H2-D1	0.342826	10.1729	65.3651	6.73003e-16	1.11232e-14
Npm1	-0.353978	9.69882	65.3149	6.90281e-16	1.14021e-14
Mtx2	-0.424494	9.37198	85.6446	6.92136e-16	1.1426e-14
Dnajc15	-0.374676	9.48137	69.1657	6.99087e-16	1.15339e-14
Mrps7	-0.405277	9.42932	76.8282	7.21791e-16	1.19015e-14
Grpel1	-0.357873	9.49732	65.2182	7.24834e-16	1.19446e-14
Fam98c	-0.422584	9.23605	194.39	7.43062e-16	1.22378e-14
Elmod3	-0.444241	9.22931	225.204	7.50726e-16	1.23567e-14
Bik	-0.452664	9.24752	167.617	7.77772e-16	1.27944e-14
Dnlz	-0.416721	9.36875	86.6025	7.8014e-16	1.28258e-14
Cdk16	-0.46361	9.29805	116.856	7.87798e-16	1.29441e-14
Gipc1	-0.4447	9.27794	127.453	8.19826e-16	1.34625e-14
Mpc2	-0.256756	10.5316	64.9555	8.27693e-16	1.35837e-14
Bcat2	-0.491088	9.27694	131.131	8.86327e-16	1.45374e-14
Vat1	-0.394681	9.22374	233.076	9.02969e-16	1.48017e-14
Atp6ap1	-0.432626	9.37212	81.2071	9.51568e-16	1.55892e-14
Ccdc107	-0.380279	9.77503	64.6634	9.593e-16	1.57067e-14
Ttr	0.395089	9.69724	64.5715	1.00491e-15	1.64438e-14
Ndrg3	-0.493286	9.27194	139.406	1.02479e-15	1.67594e-14
Atp6v1e1	-0.342742	9.78006	64.4852	1.04968e-15	1.71564e-14
Rnf208	-0.35774	9.21169	321.43	1.06157e-15	1.73406e-14
Gbas	-0.469272	9.31749	102.813	1.10811e-15	1.80904e-14
Timm8b	-0.312942	9.87976	64.296	1.15498e-15	1.88445e-14
Fam32a	-0.424049	9.37727	82.6615	1.16978e-15	1.90749e-14
Ecsit	-0.518912	9.29128	125.471	1.19258e-15	1.94353e-14
Ccnd3	-0.492373	9.34248	93.1279	1.1964e-15	1.94862e-14
Aqp2	-0.587798	9.7075	64.2188	1.20089e-15	1.9548e-14
Furin	-0.413373	9.39339	78.1526	1.20386e-15	1.95849e-14
Tecpr1	-0.431072	9.22976	213.937	1.22336e-15	1.98906e-14
Asl	-0.504746	9.48579	69.9088	1.26272e-15	2.05187e-14
Smarcc1	-0.42503	9.24517	166.719	1.2688e-15	2.06055e-14
Rab2a	-0.353697	9.53331	64.1011	1.27447e-15	2.06855e-14
Plau	-0.387306	9.21822	262.974	1.27687e-15	2.07125e-14
Atad3a	-0.518714	9.27425	140.246	1.28421e-15	2.08195e-14
Flrt1	-0.63531	9.25266	173.845	1.29512e-15	2.09842e-14
Nisch	-0.415417	9.50544	69.583	1.29712e-15	2.10045e-14
Nsa2	-0.423399	9.38973	79.7277	1.30086e-15	2.10529e-14
Ngrn	-0.429769	9.24221	176.079	1.30574e-15	2.11196e-14
Mrpl23	-0.379545	9.44831	70.2144	1.3284e-15	2.14737e-14
Ramp2	-0.41703	9.22929	192.182	1.42299e-15	2.29895e-14
Pdpk1	-0.435465	9.28286	120.15	1.46693e-15	2.36857e-14
Prodh	-0.464262	9.45464	72.9465	1.52339e-15	2.45758e-14
Akt1s1	-0.459896	9.29826	114.626	1.52381e-15	2.45758e-14
Mrps25	-0.437546	9.3177	100.587	1.57153e-15	2.53309e-14
Calm3	-0.325319	9.76345	63.6439	1.60572e-15	2.5867e-14
Pkig	-0.396764	9.41771	73.1646	1.62099e-15	2.6098e-14
Cdpf1	-0.453993	9.27074	133.891	1.66132e-15	2.67319e-14
Slc25a17	-0.43938	9.37808	85.2206	1.67899e-15	2.69973e-14
Fbxo22	-0.466946	9.30997	106.505	1.67974e-15	2.69973e-14
Sall3	-0.331601	9.20596	387.437	1.70225e-15	2.73434e-14
Eif4ebp1	-0.477645	9.28882	113.862	1.70736e-15	2.74097e-14
Smim24	-0.507586	9.3868	82.9566	1.76247e-15	2.82784e-14
Fzd4	-0.447239	9.28088	118.582	1.81699e-15	2.91364e-14
Hk2	0.197982	9.188	1346.23	1.85761e-15	2.9769e-14
Sec11c	-0.427106	9.33155	93.1519	1.85857e-15	2.9769e-14
Sri	-0.357247	9.52498	63.3351	1.87683e-15	3.00443e-14
Srrm2	-0.369335	9.59854	63.2392	1.97005e-15	3.15185e-14
Hnrnpa0	-0.428804	9.34784	87.3215	2.12432e-15	3.39673e-14
Hoxb5os	-0.473523	9.27764	113.475	2.13276e-15	3.40828e-14
Scpep1	-0.465142	9.29364	113.909	2.18274e-15	3.48616e-14
Tyrobp	-0.731003	9.59344	63.0281	2.19191e-15	3.49881e-14
Ets2	0.39232	9.24409	154.868	2.21357e-15	3.53136e-14
Sdhc	-0.357998	9.63917	63.0058	2.21678e-15	3.53448e-14
Sox4	-0.441136	9.27309	115.811	2.22201e-15	3.54081e-14
mt-Nd4	0.23062	13.6988	62.9214	2.31333e-15	3.68422e-14
Srsf1	-0.420828	9.37052	83.8442	2.32808e-15	3.70561e-14
Arglu1	-0.434139	9.41537	76.0532	2.34079e-15	3.72372e-14
Chchd1	-0.354733	9.49398	64.2876	2.35582e-15	3.7455e-14
Arpc1b	-0.486937	9.46817	62.863	2.3827e-15	3.78608e-14
Mrpl43	-0.441659	9.37853	84.3818	2.47635e-15	3.93267e-14
Cmc2	-0.471594	9.3215	101.183	2.4778e-15	3.93273e-14
Gm3468	0.120801	9.1838	4372.23	2.75939e-15	4.37719e-14
1110065P20Rik	-0.419386	9.34229	89.7187	2.8173e-15	4.46653e-14
Gm26669	0.161962	9.1865	1654.04	2.83985e-15	4.49972e-14
Cbx6	-0.449844	9.25512	148.834	2.84498e-15	4.5053e-14
Clptm1	-0.450262	9.34352	93.0016	2.85557e-15	4.51952e-14
Adamts6	0.204538	9.18985	900.133	2.93221e-15	4.63819e-14
U2af1	-0.368656	9.43171	67.5709	2.97514e-15	4.70344e-14
Nme6	-0.403354	9.23265	190.636	3.05414e-15	4.82561e-14
Emc3	-0.447873	9.29259	113.877	3.06384e-15	4.83821e-14
Irs2	0.372598	9.22536	203.222	3.10242e-15	4.89637e-14
Bad	-0.426548	9.31864	99.5819	3.11064e-15	4.90658e-14
Poldip2	-0.442365	9.34219	92.305	3.13027e-15	4.93476e-14
Cdipt	-0.46237	9.278	127.182	3.14116e-15	4.94914e-14
Sppl2b	-0.378072	9.21987	249.258	3.15477e-15	4.96779e-14
Psma7	-0.326271	9.74924	62.2272	3.28575e-15	5.17113e-14
Palm3	-0.364759	9.21094	325.69	3.2949e-15	5.18262e-14
Mrpl28	-0.378792	9.46146	67.6971	3.37504e-15	5.30569e-14
Edem2	-0.410937	9.237	180.694	3.42034e-15	5.37388e-14
Tsc22d4	-0.479423	9.30778	107.046	3.52051e-15	5.52816e-14
Sec61a1	-0.439328	9.31371	101.441	3.56289e-15	5.59158e-14
Nudt22	-0.431251	9.23745	184.491	3.57603e-15	5.60907e-14
Dll1	0.307352	9.20169	410.006	3.58228e-15	5.61572e-14
Slx4	-0.327752	9.20833	340.623	3.70971e-15	5.80979e-14
Cfap69	0.348842	9.222	223.789	3.71023e-15	5.80979e-14
Tssc4	-0.423548	9.24378	167.541	3.72115e-15	5.82363e-14
Mrps12	-0.358015	9.49385	65.7264	3.73146e-15	5.8365e-14
Nub1	0.382351	9.24594	151.907	3.89133e-15	6.08317e-14
Smim14	-0.347066	9.51762	61.8902	3.8961e-15	6.08722e-14
Gm3488	0.0988947	9.18329	1644.34	4.00824e-15	6.25893e-14
Pptc7	-0.46479	9.25776	145.159	4.06275e-15	6.34052e-14
Orai3	-0.370289	9.22068	235.956	4.11162e-15	6.41321e-14
Thra	-0.492151	9.25523	153.775	4.15254e-15	6.47342e-14
Acot3	-0.430911	9.21785	290.281	4.23024e-15	6.59088e-14
Rap1a	-0.386353	9.46686	61.6779	4.33758e-15	6.75436e-14
Eif3l	-0.466972	9.3208	101.948	4.39032e-15	6.8327e-14
Cybb	0.217529	9.24016	165.114	4.43321e-15	6.89562e-14
Prr5	-0.453241	9.29454	109.04	4.51471e-15	7.01848e-14
Wbp2	-0.433635	9.41408	78.264	4.5999e-15	7.14695e-14
Tmem161a	-0.405001	9.23046	199.802	4.60837e-15	7.15614e-14
Prpf8	-0.457076	9.27179	130.938	4.65422e-15	7.22333e-14
Igf1r	0.312161	9.48072	61.4811	4.79159e-15	7.4324e-14
Adap1	-0.35618	9.21442	276.533	4.83484e-15	7.49534e-14
Maea	-0.433914	9.26402	135.78	4.85644e-15	7.52467e-14
Rwdd1	-0.396922	9.39172	75.6773	4.97493e-15	7.70399e-14
Med22	-0.36983	9.21848	250.893	4.98475e-15	7.71492e-14
Abcd3	-0.360694	9.64281	61.3696	5.06946e-15	7.8417e-14
Stx11	0.270427	9.20095	426.362	5.08722e-15	7.86483e-14
Xcl1	0.289989	9.21775	200.454	5.09545e-15	7.87321e-14
Rtkn	-0.396861	9.22363	229.627	5.11607e-15	7.9007e-14
F11r	0.340129	9.39878	64.3567	5.1681e-15	7.97665e-14
Actn1	0.36283	9.22776	178.038	5.28331e-15	8.14998e-14
Tprgl	-0.43132	9.33883	91.1141	5.32036e-15	8.20261e-14
Slc33a1	-0.453897	9.37139	80.7558	5.38061e-15	8.29093e-14
Tln1	-0.458248	9.34401	87.9007	5.4065e-15	8.32625e-14
Anks3	-0.428261	9.23413	189.695	5.55295e-15	8.54708e-14
Camk1	-0.471348	9.27085	128.832	5.6313e-15	8.66292e-14
Fam101b	-0.356533	9.21287	285.331	5.71337e-15	8.78435e-14
Xrn1	0.378818	9.23471	176.704	5.73848e-15	8.81811e-14
Gch1	0.325729	9.20876	318.877	5.84678e-15	8.9796e-14
Arpc3	-0.36836	9.52968	61.0676	5.90575e-15	9.0652e-14
Mospd3	-0.472112	9.25462	153.342	5.9823e-15	9.17766e-14
Gadd45gip1	-0.370886	9.45451	66.9692	6.0088e-15	9.21327e-14
C3	0.127363	9.36965	79.4238	6.03983e-15	9.25579e-14
Ripk2	0.290747	9.19816	480.234	6.18061e-15	9.46635e-14
Pcsk5	0.344147	9.22224	218.312	6.20122e-15	9.49271e-14
Zfand6	-0.375467	9.45863	67.5926	6.32504e-15	9.67696e-14
Azi2	0.369853	9.33986	87.06	6.39629e-15	9.78063e-14
Mea1	-0.40444	9.36575	82.0089	6.57896e-15	1.00545e-13
Tpm4	0.376619	9.33918	80.357	6.80805e-15	1.03989e-13
Rhbdf2	0.340805	9.20744	314.106	6.83402e-15	1.04329e-13
Crip1	-0.535709	9.57077	60.7561	6.91359e-15	1.05486e-13
Hs6st1	-0.484414	9.28642	119.151	6.94936e-15	1.05974e-13
Slc52a2	-0.46298	9.25401	152.362	6.98871e-15	1.06516e-13
Nucb1	-0.461715	9.28595	115.903	7.06171e-15	1.0757e-13
Ralbp1	-0.446317	9.34133	89.0963	7.16078e-15	1.0902e-13
4930402H24Rik	-0.471394	9.35659	86.8905	7.25365e-15	1.10374e-13
Cby1	-0.388869	9.22522	213.478	7.26423e-15	1.10475e-13
Slc6a13	-0.67741	9.32046	106.687	7.30033e-15	1.10963e-13
Suds3	-0.430745	9.38665	79.4446	7.40311e-15	1.12465e-13
Alyref	-0.440318	9.28944	110.544	7.69902e-15	1.16897e-13
Dstn	-0.338311	9.72931	60.5181	7.79821e-15	1.18338e-13
Fam120a	-0.406235	9.38625	76.3779	7.89642e-15	1.19764e-13
Zfp444	-0.506137	9.27872	124.488	8.34012e-15	1.26425e-13
Cbx1	-0.451226	9.33792	91.938	8.54068e-15	1.29395e-13
Srm	-0.397475	9.24166	156.726	8.65171e-15	1.31006e-13
Tmem167b	-0.389122	9.2286	198.947	8.91567e-15	1.3493e-13
Gm28347	0.0997065	9.18375	2716.07	9.06542e-15	1.37122e-13
Hmox2	-0.442012	9.30387	104.313	9.22055e-15	1.39394e-13
Mapk15	-0.409953	9.21858	256.554	9.36372e-15	1.41482e-13
Ptprcap	-0.431111	9.23222	159.574	9.41552e-15	1.42188e-13
Hagh	-0.336718	9.69076	60.1104	9.58409e-15	1.44655e-13
Szrd1	-0.414544	9.34193	86.2979	9.5948e-15	1.44739e-13
Oxld1	-0.484053	9.24792	162.556	9.82157e-15	1.4808e-13
Armcx4	0.236969	9.19038	898.408	9.99039e-15	1.50544e-13
Galt	-0.461622	9.27766	123.345	1.00634e-14	1.51491e-13
Ms4a6c	0.281996	9.25428	120.056	1.00641e-14	1.51491e-13
Utp20	-0.534481	9.26163	139.073	1.02108e-14	1.53617e-13
Sec14l1	-0.431712	9.2515	142.784	1.04892e-14	1.57721e-13
Bcl2l15	0.185065	9.18661	1675.26	1.08565e-14	1.63156e-13
Amdhd2	-0.46573	9.30715	104.479	1.08828e-14	1.63464e-13
Dcaf8	-0.434117	9.39045	78.3995	1.15852e-14	1.73921e-13
Os9	-0.452916	9.29598	108.425	1.1626e-14	1.7444e-13
Dnase2a	-0.367252	9.22206	219.662	1.18641e-14	1.77916e-13
Lpcat3	-0.45961	9.29973	106.783	1.19446e-14	1.79028e-13
Mettl9	-0.392858	9.37233	75.9455	1.19594e-14	1.79154e-13
Sbno2	0.253938	9.19167	779.407	1.20695e-14	1.80707e-13
Supt4a	-0.376782	9.40853	69.981	1.21531e-14	1.81808e-13
Gstt3	-0.457483	9.28791	110.337	1.2156e-14	1.81808e-13
Ubxn6	-0.438953	9.32616	94.0937	1.30203e-14	1.9463e-13
Slc5a2	-0.449763	9.53492	59.4931	1.30979e-14	1.95686e-13
Rnf126	-0.432871	9.24789	154.826	1.32439e-14	1.97762e-13
Cdk2ap1	-0.427906	9.24222	164.19	1.33486e-14	1.99219e-13
Mtfr1l	-0.451388	9.36729	85.7975	1.34788e-14	2.01055e-13
Tspan9	-0.415101	9.23425	182.222	1.35676e-14	2.02271e-13
Odc1	0.269395	9.85153	59.3943	1.37691e-14	2.05166e-13
Tmem9	-0.438224	9.27345	122.06	1.39799e-14	2.08196e-13
Ccdc61	-0.374893	9.21491	272.082	1.43243e-14	2.13213e-13
L3hypdh	-0.625549	9.28482	122.572	1.43449e-14	2.13406e-13
Egln2	-0.437141	9.31268	99.2086	1.47147e-14	2.1879e-13
Mapt	-0.643582	9.3413	96.459	1.47541e-14	2.1926e-13
Batf	0.268417	9.19949	437.111	1.49926e-14	2.22686e-13
2210016L21Rik	-0.452268	9.28938	111.755	1.54256e-14	2.28995e-13
Jtb	-0.384273	9.44211	67.8523	1.57391e-14	2.33526e-13
Mbnl2	0.347252	9.35112	76.4343	1.60876e-14	2.3857e-13
Fam136a	-0.42084	9.29708	102.953	1.6168e-14	2.39636e-13
Cela1	0.233058	9.81426	59.0655	1.62612e-14	2.4089e-13
Suv420h2	-0.414049	9.23169	190.951	1.63229e-14	2.41676e-13
Sptssa	-0.39857	9.44362	69.3507	1.6724e-14	2.47483e-13
Rala	-0.410608	9.33013	88.6948	1.78373e-14	2.63819e-13
Cs	-0.42747	9.36807	80.0114	1.84128e-14	2.72186e-13
Sema3c	-0.484491	9.29952	101.638	1.87191e-14	2.76568e-13
Shmt2	-0.559923	9.3549	89.169	1.87767e-14	2.77273e-13
Elmsan1	0.29783	9.20032	402.682	1.94016e-14	2.8635e-13
Ilkap	-0.425281	9.30145	101.3	1.9748e-14	2.9131e-13
Gcsh	-0.484597	9.46993	67.6688	1.99141e-14	2.93605e-13
Ilvbl	-0.413028	9.23556	177.454	2.005e-14	2.95452e-13
Ube2g1	-0.420837	9.32327	91.8785	2.05957e-14	3.03334e-13
Klrd1	-0.389704	9.21741	219.392	2.14665e-14	3.15949e-13
Pgap1	-0.402082	9.22994	190.077	2.14748e-14	3.15949e-13
Cyp7b1	0.264199	9.21868	192.422	2.15972e-14	3.17584e-13
Thap7	-0.43556	9.26463	129.611	2.16582e-14	3.18313e-13
Pttg1	0.326502	9.43891	60.7544	2.19522e-14	3.22465e-13
Lsm2	-0.419486	9.28319	110.707	2.20891e-14	3.24164e-13
Tmppe	-0.476691	9.22921	207.477	2.20911e-14	3.24164e-13
Dnm2	-0.469076	9.27719	121.436	2.22261e-14	3.25975e-13
Fzd1	-0.449458	9.23376	182.781	2.24576e-14	3.29198e-13
Rae1	-0.418412	9.25299	141.096	2.27316e-14	3.33041e-13
Commd9	-0.425486	9.26624	125.186	2.31655e-14	3.39181e-13
Snrpd2	-0.328646	9.5956	58.3655	2.3175e-14	3.39181e-13
Casp8	0.371137	9.26723	120.33	2.35517e-14	3.44515e-13
Commd4	-0.406079	9.33671	85.8717	2.52505e-14	3.69172e-13
Ldha	-0.313537	9.88405	58.1546	2.57865e-14	3.76811e-13
Ncbp2	-0.429449	9.2606	131.69	2.58872e-14	3.78085e-13
Ufc1	-0.380964	9.41186	70.9174	2.60405e-14	3.80126e-13
Igfbp5	-0.925398	9.34107	83.1947	2.61943e-14	3.82172e-13
Pmm1	-0.42614	9.24002	166.752	2.62416e-14	3.82663e-13
Matr3	-0.405693	9.38042	75.9601	2.67323e-14	3.89615e-13
Actr3	-0.38267	9.46723	58.0714	2.6896e-14	3.91797e-13
Slc25a34	-0.462485	9.2255	225.753	2.7205e-14	3.96093e-13
Gpt2	-0.454935	9.2612	131.017	2.72617e-14	3.96711e-13
Dhrs11	-0.427956	9.23254	185.664	2.77298e-14	4.03314e-13
Elk3	-0.336611	9.21149	276.207	2.79109e-14	4.05737e-13
Gsk3a	-0.432384	9.25411	141.352	2.83703e-14	4.12202e-13
Yipf2	-0.36312	9.21934	233.243	2.86283e-14	4.15733e-13
Dlat	-0.446946	9.33927	88.1362	2.91586e-14	4.23215e-13
Retnlg	0.0112451	9.50117	57.8912	2.9465e-14	4.27441e-13
Hspa9	-0.314722	9.81659	57.8881	2.95114e-14	4.27892e-13
Idh3a	-0.428074	9.39511	73.7617	2.95599e-14	4.28374e-13
Myl6	-0.24648	10.3291	57.8398	3.02417e-14	4.38028e-13
Eif4e	-0.373763	9.40537	69.0613	3.16109e-14	4.57623e-13
Acta2	0.300883	9.21371	202.262	3.2005e-14	4.63088e-13
Gatm	0.256183	10.3904	57.5394	3.52097e-14	5.09195e-13
Psmd13	-0.426247	9.30576	98.8277	3.55813e-14	5.14303e-13
Znhit1	-0.364685	9.42775	66.0745	3.6009e-14	5.20217e-13
Parp8	0.342967	9.21606	232.233	3.69023e-14	5.32847e-13
Cdkl1	-0.525224	9.24966	150.003	3.73239e-14	5.38657e-13
Tnfrsf1a	0.334715	9.27329	113.391	3.79435e-14	5.47143e-13
Klc2	-0.363066	9.21767	241.573	3.7951e-14	5.47143e-13
Ubald1	-0.409743	9.24868	145.201	3.89909e-14	5.61846e-13
Aqp4	0.220619	9.19873	398.13	3.94868e-14	5.68699e-13
Trabd	-0.426741	9.29603	103.39	4.0861e-14	5.88189e-13
Rnf181	-0.422934	9.57799	57.189	4.20444e-14	6.04912e-13
Pvrl3	-0.450804	9.37869	75.4694	4.22085e-14	6.06708e-13
Lgr4	-0.361475	9.53331	57.1812	4.22126e-14	6.06708e-13
Coq9	-0.452851	9.42964	71.5302	4.27588e-14	6.14244e-13
Narf	-0.402499	9.22854	191.696	4.43217e-14	6.36369e-13
Slc25a36	-0.422327	9.37435	74.9194	4.43818e-14	6.36904e-13
Traf4	-0.47958	9.28204	116.086	4.45273e-14	6.38666e-13
Npc2	-0.352397	9.51759	57.0709	4.4636e-14	6.39897e-13
Nubp1	-0.415322	9.27952	109.725	4.47197e-14	6.40723e-13
Mrps17	-0.365653	9.44674	64.1498	4.47394e-14	6.40723e-13
Snhg11	-0.645934	9.44515	57.0277	4.56248e-14	6.53069e-13
2310061I04Rik	-0.456128	9.31489	96.5497	4.57725e-14	6.54849e-13
Cyba	-0.291857	10.4136	57.0162	4.58909e-14	6.56207e-13
Fut9	-0.524864	9.97118	57.0032	4.61945e-14	6.60211e-13
Tmie	-0.40371	9.21452	282.568	4.68471e-14	6.69196e-13
Ptp4a3	-0.310925	9.20724	307.198	4.74859e-14	6.77976e-13
Usp42	0.336578	9.211	262.504	4.75779e-14	6.78943e-13
Dok2	-0.329736	9.20596	339.724	4.80191e-14	6.84891e-13
Aco1	-0.424281	9.42726	65.2489	4.83863e-14	6.89776e-13
Ubald2	0.309385	9.41652	60.9963	4.87885e-14	6.95155e-13
Cxx1a	-0.407943	9.26638	117.601	4.88259e-14	6.95335e-13
Rnf6	-0.441123	9.33885	85.4366	4.9831e-14	7.09287e-13
Pdk1	-0.440996	9.23746	168.85	5.05233e-14	7.18775e-13
Mdh1	-0.272521	10.2447	56.7343	5.29319e-14	7.5266e-13
Ttyh2	-0.503795	9.2675	126.304	5.29897e-14	7.531e-13
Klk1	-0.524517	10.8098	56.7051	5.37217e-14	7.63115e-13
Shmt1	-0.467076	9.27117	121.091	5.49986e-14	7.80857e-13
Rasgrp2	-0.387664	9.21475	263.326	5.5078e-14	7.81589e-13
Sv2a	-0.385796	9.21916	231.183	5.53339e-14	7.84822e-13
Naa10	-0.469262	9.27218	120.908	5.57945e-14	7.90954e-13
Mllt4	-0.430437	9.29109	103.742	5.709e-14	8.0891e-13
Eif4e2	-0.405963	9.33128	84.8823	5.85138e-14	8.28665e-13
Bmp7	-0.494619	9.24726	156.17	5.93566e-14	8.40175e-13
Caskin2	-0.376584	9.21954	230.898	6.00569e-14	8.49658e-13
Armc1	-0.456119	9.3406	85.0656	6.08882e-14	8.60984e-13
Anp32b	-0.408498	9.34559	75.928	6.32164e-14	8.93454e-13
Bag2	-0.357745	9.21914	225.54	6.39274e-14	9.03047e-13
Espn	-0.448615	9.30362	95.3053	6.46605e-14	9.12942e-13
Them6	-0.448772	9.23076	193.729	6.49442e-14	9.16485e-13
Aim1	0.32657	9.20957	270.34	6.61108e-14	9.32478e-13
Neurl1b	-0.316577	9.20651	337.867	6.70208e-14	9.44838e-13
Fdx1l	-0.431855	9.32531	88.7201	6.71382e-14	9.46017e-13
Gmnn	-0.392809	9.23004	180.822	6.7286e-14	9.47622e-13
Ubr4	0.369669	9.28819	100.217	6.85732e-14	9.65266e-13
Trappc6a	-0.400384	9.33776	83.7585	7.09884e-14	9.9876e-13
Commd3	-0.370718	9.44382	65.0518	7.21224e-14	1.01421e-12
Gan	0.295672	9.20772	294.197	7.26249e-14	1.02076e-12
Gm42418	-0.451521	9.58429	56.1023	7.29042e-14	1.02417e-12
Samd10	-0.303413	9.20806	302.27	7.29875e-14	1.02483e-12
Psmd9	-0.419997	9.28512	106.948	7.3223e-14	1.02762e-12
Hes1	0.340516	9.33749	62.0789	7.37231e-14	1.03412e-12
Psmd2	-0.408159	9.31781	89.2726	7.38204e-14	1.03496e-12
Slc23a1	-0.655082	9.33722	89.6711	7.45839e-14	1.04514e-12
Gtf3c1	-0.429003	9.25895	131.674	7.4676e-14	1.04591e-12
[truncated: 6,908 more rows]

## Sheet: 16hr_pseudobulk
	logFC	logCPM	F	PValue	FDR
Gatm	-3.80586	10.3904	2092.8	0	0
Fgb	3.7793	9.43339	20181	0	0
Gbp2	3.75379	9.65895	18165.7	0	0
Ttc36	-3.72514	10.7158	3424.21	0	0
Keg1	-3.68377	10.2076	3014.42	0	0
Plac8	3.63868	10.0219	9857.76	0	0
Fgg	3.59028	9.87084	13049.1	0	0
mt-Nd3	-3.50205	11.1198	4469.07	0	0
Fga	3.43574	9.73729	11636.3	0	0
Malat1	-3.32562	15.9535	2032.2	0	0
Sord	-3.2132	10.0831	2848.54	0	0
RP24-64C6.3	-3.08922	9.86906	2288.81	0	0
Fut9	-3.07517	9.97118	2203.45	0	0
Lrp2	-3.073	10.3977	2341.32	0	0
Slc22a30	-3.07164	9.7605	1713.63	0	0
Gk	-3.06914	9.93437	2307.79	0	0
Ubd	3.05155	9.33913	11177.5	0	0
Lcn2	3.00219	10.1357	4745.65	0	0
Slc22a6	-2.99315	9.85214	1638.42	0	0
Cml1	-2.96992	9.93015	2077.95	0	0
mt-Nd4	-2.96391	13.6988	5790.81	0	0
Spp1	2.93713	12.443	5850.98	0	0
Zbtb20	-2.92253	10.1782	2252.21	0	0
Akr1c21	-2.83877	10.6889	2375.06	0	0
Iigp1	2.79691	9.49437	7948.1	0	0
Acy3	-2.76128	10.2475	1788.6	0	0
Pah	-2.75819	9.88614	1914.57	0	0
Slc34a1	-2.72177	10.993	2189.67	0	0
Ass1	-2.71767	10.5594	2103.37	0	0
Pdzk1	-2.70302	9.98835	2061.66	0	0
mt-Nd4l	-2.68793	10.7859	2811.81	0	0
Hykk	-2.68335	9.58961	1840.32	0	0
mt-Co3	-2.58907	15.3034	4987.97	0	0
Cela1	-2.57245	9.81426	1637.57	0	0
Miox	-2.56395	10.7659	2063.45	0	0
Plin2	2.54555	9.63938	5557.99	0	0
Pter	-2.49881	9.65656	1661.49	0	0
Saa1	2.44523	9.85032	4139.4	0	0
Tmem174	-2.43912	9.55068	1610.42	0	0
mt-Nd2	-2.43507	12.662	3815.87	0	0
mt-Atp8	-2.42061	10.4827	2832.67	0	0
Mt1	2.39294	11.3603	2864.48	0	0
mt-Co2	-2.38981	13.8332	3949.75	0	0
4833439L19Rik	-2.38735	10.0444	2143.68	0	0
Lactb2	-2.34447	9.64674	1596.58	0	0
mt-Nd1	-2.29165	14.4722	4265.78	0	0
Saa2	2.28118	9.33797	4731.4	0	0
mt-Cytb	-2.24222	14.5318	3840.64	0	0
Akr7a5	-2.2284	9.81744	1648.11	0	0
Igtp	2.22677	9.42259	5281.93	0	0
Acsm2	-2.21216	10.8098	1653.58	0	0
Mt2	2.20474	10.2062	2294.62	0	0
Chpt1	-2.16365	11.0062	1882.24	0	0
Pcbd1	-2.16138	9.87087	1735.2	0	0
Hspe1	-2.11517	10.3659	2244.23	0	0
Irgm1	2.10818	9.67802	3873.13	0	0
Tns1	-2.08178	9.94791	1580.53	0	0
Scp2	-2.02396	10.5141	2113.21	0	0
Rps2	-1.98516	10.9639	2938.28	0	0
Gm9844	1.96909	9.25372	5455.85	0	0
Gbp3	1.88748	9.29434	4626.87	0	0
Havcr1	1.87274	9.21851	13127.2	0	0
Psmb8	1.86276	9.55333	2478.28	0	0
Rpl10	-1.83559	10.9774	2355.47	0	0
Chchd10	-1.82438	11.1108	2750.45	0	0
Cd14	1.8003	9.31277	2620.86	0	0
Rps17	-1.79332	10.7755	2838.39	0	0
Mgst1	1.76917	9.97757	2722.57	0	0
Rps21	-1.7478	10.4084	2135.42	0	0
Rpl28	-1.68824	10.6712	2279.98	0	0
Rpl35a	-1.67378	11.0701	2745.79	0	0
Rpl6	-1.67171	10.5816	1854.04	0	0
Rps8	-1.66651	10.9083	2401.46	0	0
Rps10	-1.66251	10.2975	1634.28	0	0
Guca2b	1.65579	11.4261	2070.41	0	0
Gm2000	1.64614	9.39241	2012.86	0	0
Atp5d	-1.64515	10.453	2093.17	0	0
Ndufv3	-1.63948	10.2458	1641.4	0	0
Slc25a3	-1.60639	10.2647	1605.07	0	0
Hspa8	-1.59962	10.6444	1833.23	0	0
Rpl29	-1.58431	10.3757	1648.73	0	0
mt-Atp6	-1.58291	15.333	2143.02	0	0
Rpl8	-1.57805	10.5688	1851.73	0	0
Eef1a1	-1.57497	11.4273	2617.51	0	0
Fxyd2	-1.56352	12.9102	2175.39	0	0
Rpl21	-1.56064	10.7161	1949.8	0	0
Fau	-1.52699	10.9674	2047.99	0	0
Rps25	-1.5074	10.6394	1842.98	0	0
Gpx4	-1.48377	11.2438	1969.45	0	0
Rpl26	-1.47371	10.9832	2208.21	0	0
Atp5b	-1.47147	10.7724	1935.21	0	0
Rplp0	-1.46785	10.9749	1762.65	0	0
Rpl11	-1.46527	10.7576	1861.22	0	0
Irf7	1.45284	9.55964	1792.61	0	0
Rpl17	-1.44767	10.7898	1635.5	0	0
Rps15	-1.4375	10.6263	1704.81	0	0
Rpl32	-1.42978	11.2234	1993.3	0	0
Rpl9	-1.42644	10.6508	1589.24	0	0
Rps27a	-1.42578	10.9071	1697.16	0	0
Rpl36	-1.42543	10.9522	2194.99	0	0
Rpl39	-1.41472	10.9172	1756.23	0	0
Rplp1	-1.41394	10.9551	1934.87	0	0
Chchd2	-1.40546	11.2558	2320.84	0	0
Rps29	-1.36655	11.7662	2723.96	0	0
Atp5j2	-1.34922	10.8636	2004.78	0	0
Rps23	-1.34859	11.1047	1795.73	0	0
Uqcrh	-1.33671	10.7916	1872.04	0	0
Rpl23	-1.30366	10.8965	1705.81	0	0
2010107E04Rik	-1.29334	10.9419	1693	0	0
Ndufa6	-1.28454	10.7281	1634.65	0	0
Prdx5	-1.2642	11.5151	1879.56	0	0
Cox8a	-1.22468	11.6507	2272.92	0	0
Rpl37a	-1.17697	11.5159	1929.36	0	0
Cox4i1	-0.975729	11.5489	1644.06	0	0
Rps13	-1.53921	10.4534	1561.65	4.94065645841247e-324	1.20057951939423e-321
Rps3a1	-1.51355	10.5538	1556.04	8.39911597930119e-323	2.02715134488663e-320
Rps4x	-1.58774	10.5769	1554.94	1.38338380835549e-322	3.31023982713635e-320
Eef2	-1.59196	10.2755	1551.72	5.82997462092671e-322	1.38328499522632e-319
Slc13a3	-2.67575	9.63968	1551.23	7.2133584292822e-322	1.69711549346468e-319
Rpl13	-1.27557	11.2242	1548.55	2.42586232108052e-321	5.65991722562815e-319
Defb29	-2.59815	9.70706	1540.88	7.6817326615397e-320	1.77746390725091e-317
Gapdh	-1.44537	10.6925	1539.96	1.16154833337277e-319	2.66565807042086e-317
Rpl23a	-1.45236	10.6272	1539.04	1.76218393902197e-319	4.01118903932022e-317
Pdzk1ip1	-1.80845	10.4955	1538.94	1.84044393732323e-319	4.15554415159083e-317
Hist1h2bc	-1.98146	10.1376	1519.05	1.45061560927491e-315	3.24914686627279e-313
Slc22a12	-2.46293	10.1156	1514.01	1.41072659189455e-314	3.13472405713125e-312
Sfxn1	-2.28206	9.71755	1511.44	4.49634091285647e-314	9.91248447859317e-312
Gcnt1	-2.45605	9.74595	1510.11	8.20860995296039e-314	1.79550516767974e-311
Tcea3	-2.31003	9.52382	1509.33	1.16679231026856e-313	2.53239155836407e-311
Qdpr	-2.20977	9.68171	1503.33	1.75374030752047e-312	3.77701700999678e-310
Rplp2	-1.34518	10.6804	1503.09	1.9621217290848e-312	4.19354840999363e-310
Vdac1	-1.87428	9.8863	1503.03	2.00801457778198e-312	4.25912061732879e-310
Rpl7a	-1.67107	10.0928	1502.6	2.44401310641996e-312	5.14492322958994e-310
Rpl13a	-1.29687	11.0491	1500.02	7.85041243469007e-312	0
Ybx1	-1.38891	10.8188	1493.4	1.56329545757607e-310	3.24216e-308
Rps7	-1.50653	10.5458	1493.26	1.66301984634695e-310	3.42362e-308
Slc47a1	-2.45058	9.62074	1493.06	1.82234164310683e-310	3.72423e-308
Aldob	-1.93442	11.4863	1492.1	2.80867456188052e-310	5.69835e-308
Cstb	1.3013	9.926	1482.86	0	3.70711e-306
RP23-306P12.2	-2.42256	9.77169	1470.24	5.57445e-306	1.11481e-303
Acaa1b	-2.55366	9.81537	1465.36	5.07506e-305	1.00774e-302
Rpl37	-1.06847	11.2638	1462.05	2.27193e-304	4.47955e-302
Mpc2	-1.40621	10.5316	1460.52	4.53883e-304	8.88659e-302
Atp5g2	-1.48392	10.2137	1451.39	2.84411e-302	5.52982e-300
Akr1a1	-1.49575	10.916	1448.79	9.27566e-302	1.79103e-299
Tgtp1	1.54691	9.23952	5270.2	3.82378e-300	7.33276e-298
Csrp2	-2.15458	9.59615	1428.94	7.55346e-298	1.43865e-295
Ifi47	1.5248	9.32246	2689.1	9.64678e-298	1.82494e-295
Hmgcs1	-2.20418	9.69269	1413.45	8.58284e-295	1.61277e-292
Abhd14b	-2.1678	9.57798	1469.66	1.13083e-294	2.11072e-292
Tnfaip8	-2.28187	9.637	1405.57	3.08466e-293	5.7195e-291
Ndrg1	-1.75295	10.9413	1404.86	4.2632e-293	7.8527e-291
Rps15a	-1.39895	10.6916	1391.96	1.50702e-290	2.75775e-288
Galnt11	-2.18482	9.7605	1388.96	5.91844e-290	1.076e-287
Fmo1	-2.18739	9.67952	1370.99	2.11789e-286	3.82559e-284
Rpl10a	-1.47354	10.351	1370.83	2.28833e-286	4.10697e-284
Ghr	-2.3291	9.88942	1369	5.25339e-286	9.36843e-284
Nudt19	-2.29715	9.9301	1360.24	2.85659e-284	5.06195e-282
Rpl19	-1.21842	10.7283	1355.43	2.56536e-283	4.51729e-281
Fam195a	-2.06789	9.63906	1355.38	2.61467e-283	4.57535e-281
Rps24	-1.33008	10.6654	1354.71	3.55186e-283	6.1767e-281
Pecr	-2.19629	9.70836	1351.14	1.81277e-282	3.13296e-280
Odc1	-2.14448	9.85153	1350.36	2.59126e-282	4.45092e-280
Cox6b1	-0.993315	11.1988	1336.57	1.40731e-279	2.40256e-277
Uqcr10	-0.993682	11.3738	1336.39	1.52471e-279	2.58721e-277
Inmt	-2.42262	9.76729	1334.53	3.57403e-279	6.02806e-277
Cyp2j5	-2.06125	10.0197	1334.47	3.66776e-279	6.1491e-277
Ascc1	-2.13355	9.53895	1332.59	8.6374e-279	1.43946e-276
Ak4	-2.20767	9.49516	1330.05	2.75764e-278	4.56855e-276
BC021785	-2.20429	9.55285	1319.78	3.02182e-276	4.97677e-274
Aspa	-2.19017	9.52003	1298.12	6.09405e-272	9.97784e-270
Atp5g1	-1.11453	10.9966	1290.4	2.08884e-270	3.40019e-268
Pdk4	1.44004	9.36907	1403.79	5.07427e-270	8.2121e-268
Atp5k	-1.14108	10.8132	1287.38	8.36204e-270	1.34552e-267
Snx10	1.54054	9.28414	2469.01	1.65681e-268	2.6507e-266
Cmbl	-2.13141	9.49055	1334.22	3.41738e-268	5.43635e-266
Rpl14	-1.20464	10.7385	1276.95	9.95172e-268	1.57417e-265
Uqcr11	-1.01642	11.1046	1271.99	9.68342e-267	1.52313e-264
Atp5a1	-1.34247	10.4404	1271.96	9.84146e-267	1.53934e-264
Slc17a3	-2.22484	9.60105	1270.51	1.9138e-266	2.97682e-264
Dcxr	-1.97495	9.71537	1270.48	1.93497e-266	2.99312e-264
Rpl22	-1.58877	10.0411	1268.16	5.61273e-266	8.63435e-264
Rpl4	-1.50012	10.2897	1266.41	1.25371e-265	1.91811e-263
Rpsa	-1.54789	10.2149	1262.37	7.99923e-265	1.21719e-262
Aldh6a1	-1.84718	9.93235	1260.19	2.17439e-264	3.29073e-262
Ankrd13c	-2.00511	9.58427	1258.34	5.08981e-264	7.66154e-262
Rbm39	-1.72485	9.97823	1257.07	9.15057e-264	1.37004e-261
Isg15	1.35098	9.57366	1256.6	1.13058e-263	1.68372e-261
Gm11128	-2.41439	9.54675	1255.29	2.07163e-263	3.06886e-261
Hao2	-2.15795	9.50447	1253.7	4.29691e-263	6.33183e-261
Acot13	-1.88859	9.72039	1246.76	1.04194e-261	1.52735e-259
Lpl	-2.44325	9.85673	1246.09	1.41634e-261	2.06535e-259
Cldn10	-2.06136	9.80904	1245.91	1.53732e-261	2.23015e-259
Mrpl12	-1.72643	9.81121	1242.55	7.21507e-261	1.04128e-258
Tpi1	-1.5994	9.97363	1237.06	8.99407e-260	1.29136e-257
Slc27a2	-2.10656	10.9495	1235.9	1.53443e-259	2.19188e-257
Etfb	-1.46992	10.2602	1235.59	1.7662e-259	2.51015e-257
Ggt1	-2.13029	9.8219	1231.98	9.31372e-259	1.317e-256
Slc22a28	-2.18189	9.50322	1229.16	3.39524e-258	4.77688e-256
Dnajc12	-2.05064	9.68498	1228	5.78972e-258	8.10503e-256
4931406C07Rik	-1.98494	9.86434	1223.65	4.29435e-257	5.98175e-255
Cox7b	-1.23478	10.5655	1222.27	8.09955e-257	1.12263e-254
Rpl41	-0.797014	12.2954	1221.12	1.37266e-256	1.8932e-254
Nus1	-1.93891	9.75699	1219.34	3.12619e-256	4.29054e-254
Atp5h	-1.26418	10.4553	1213.91	3.79399e-255	5.15856e-253
Ces1f	-2.26376	9.60293	1213.91	3.7955e-255	5.15856e-253
Maf	-2.14334	10.0271	1208.18	5.32867e-254	7.20734e-252
Khk	-1.791	10.1441	1204.37	3.08562e-253	4.15342e-251
Ifit2	1.22386	9.43478	2406.33	8.35206e-253	1.11886e-250
Atp5e	-0.953605	11.1259	1197.98	5.86601e-252	7.82079e-250
Aes	-1.79044	9.81439	1197.65	6.83033e-252	9.06329e-250
Mdh1	-1.44216	10.2447	1194.64	2.73601e-251	3.61334e-249
Rpl18	-1.34017	10.3588	1188.7	4.22426e-250	5.55262e-248
Aqp1	-2.46078	9.63285	1187.11	8.82163e-250	1.15415e-247
Timp3	-1.75362	10.7403	1185.36	1.97084e-249	2.5665e-247
Bdh2	-1.96519	9.6854	1183.33	5.04265e-249	6.53631e-247
Rps3	-1.24499	10.5508	1177.67	6.87282e-248	8.86752e-246
Mat2a	-2.08672	9.98328	1176.93	9.64025e-248	1.23811e-245
Clu	1.72264	9.8439	1173.92	3.87019e-247	4.94784e-245
Rab11fip3	-2.00804	9.55663	1167.74	6.72094e-246	8.55331e-244
Cyp2e1	-2.38468	10.0591	1165.37	2.01215e-245	2.54914e-243
Oaz1	-1.07903	10.6256	1165.22	2.15926e-245	2.7232e-243
Rpl38	-0.993383	10.9739	1164.66	2.7984e-245	3.51344e-243
Kap	-2.50522	13.3527	1160.17	2.22109e-244	2.77617e-242
Rps26	-1.27938	10.4592	1159.05	3.72814e-244	4.63913e-242
Cyb5a	-1.44202	10.8254	1146.98	9.90147e-242	1.22664e-239
Mrps21	-1.37858	10.1399	1146.58	1.18916e-241	1.4667e-239
Rpl24	-1.0379	10.7882	1133.69	4.64215e-239	5.70048e-237
Kl	-2.13767	9.86799	1131.5	1.28008e-238	1.56505e-236
Ndufb10	-1.39696	10.0958	1130.23	2.30815e-238	2.80972e-236
Gas2	-1.94691	9.55179	1119.44	3.41317e-236	4.13688e-234
Rpl7	-1.33808	10.2561	1117.29	9.24518e-236	1.11572e-233
Rpl27a	-1.13034	10.6955	1116.17	1.55389e-235	1.8672e-233
Stard10	-1.82048	9.74157	1109.07	4.18521e-234	5.00758e-232
Dao	-1.88928	9.65978	1108.63	5.13083e-234	6.11289e-232
Gm42418	-1.92516	9.58429	1100.52	2.20748e-232	2.61886e-230
RP23-306P12.3	-2.16683	9.47522	1088.16	6.83498e-230	8.07451e-228
Atp5g3	-1.14351	10.7452	1087.29	1.02708e-229	1.20825e-227
Neu1	-1.89252	9.66599	1083.91	4.9276e-229	5.7725e-227
Orm2	1.19223	9.1993	5448.57	4.17039e-228	4.8651e-226
Ddah1	-1.89637	9.58081	1077.86	8.19624e-228	9.52192e-226
Rpl30	-1.44213	10.0455	1074.94	3.17947e-227	3.67846e-225
mt-Nd5	-1.28584	11.0479	1071.64	1.47603e-226	1.70065e-224
Rps11	-1.10639	10.7408	1066.29	1.7762e-225	2.03812e-223
Cox7a2	-0.885337	11.1594	1062.13	1.22778e-224	1.40307e-222
Rpl36a	-1.24424	10.3623	1061.59	1.58038e-224	1.79868e-222
Atp5c1	-1.33047	10.1225	1059.82	3.6032e-224	4.08431e-222
Gabarapl1	-1.64561	9.99722	1059.24	4.72626e-224	5.33572e-222
Rnf181	-1.8007	9.57799	1052.55	1.0613e-222	1.19334e-220
Rps16	-1.0759	10.8345	1050.8	2.39192e-222	2.67875e-220
Gm26917	-1.98459	9.61392	1045.56	2.74722e-221	3.06441e-219
Sdhb	-1.37715	10.0102	1043.04	8.88263e-221	9.86889e-219
Hadh	-1.67966	9.69483	1039.71	4.18596e-220	4.63235e-218
Pth1r	-1.71755	9.916	1038.27	8.20866e-220	9.04827e-218
Ddx5	-1.34659	10.2028	1036.33	2.02265e-219	2.2208e-217
Hsp90ab1	-1.40219	10.096	1035.6	2.84122e-219	3.10736e-217
Ccdc107	-1.70188	9.77503	1033.66	7.02271e-219	7.65065e-217
Fitm1	-1.93937	9.47231	1095.26	2.81421e-218	3.05396e-216
Gstz1	-1.8423	9.51467	1059.52	7.00304e-218	7.57031e-216
Mrps36	-1.61689	9.69453	1027	1.56874e-217	1.68929e-215
Cyc1	-1.42778	9.93396	1022.68	1.17624e-216	1.26177e-214
Ndufa2	-0.919146	10.8436	1013.63	8.00936e-215	8.55901e-213
Cat	-1.6659	10.0772	1004.57	5.52299e-213	5.87957e-211
Cndp2	-2.0062	10.0599	1003.16	1.06753e-212	1.13215e-210
Ly6a	1.2781	10.6078	1002.6	1.38421e-212	1.46246e-210
Rps12	-1.39678	10.1711	1002	1.82841e-212	1.92451e-210
Amacr	-1.90621	9.4457	1114.41	7.19955e-212	7.54955e-210
Aco2	-1.57829	9.7893	996.9	1.98357e-211	2.07224e-209
Slc4a4	-1.79055	10.1945	996.614	2.26771e-211	2.36027e-209
Itpr1	-1.76091	9.62764	993.149	1.14494e-210	1.18726e-208
AW112010	1.46839	9.91234	990.932	3.22666e-210	3.33358e-208
D630029K05Rik	-1.90794	9.39078	1228.51	5.80123e-209	5.97143e-207
Hnf4a	-1.82427	9.56189	983.901	8.63952e-209	8.86041e-207
Slc25a10	-1.84083	9.51735	1049.97	1.00799e-208	1.02998e-206
Rpl18a	-0.978216	11.1214	983.508	1.03809e-208	1.05689e-206
Xylb	-1.89453	9.46928	1104.15	4.37761e-208	4.44074e-206
Gm4841	1.20245	9.20609	6984.49	2.34003e-207	2.36521e-205
Car2	-1.86711	9.75479	973.42	1.16402e-206	1.17231e-204
Pde4d	-1.97465	9.44913	1057.77	1.42697e-206	1.43198e-204
Ndufb9	-1.05256	10.4818	972.701	1.62968e-206	1.62957e-204
Dnajc19	-1.51442	9.88098	970.909	3.77093e-206	3.75724e-204
Hrsp12	-1.43789	10.6386	969.61	6.92594e-206	6.87633e-204
Cubn	-1.88745	9.46784	1049.28	1.79081e-205	1.77169e-203
Slc5a12	-2.05206	9.47574	962.92	1.58833e-204	1.56584e-202
Cyp4b1	-1.87883	10.2496	961.686	2.83082e-204	2.78096e-202
Gstm1	-2.03113	9.79001	961.474	3.12516e-204	3.05938e-202
Klf9	-1.77123	9.52322	957.937	1.63904e-203	1.59895e-201
Acadm	-1.58286	9.9123	957.408	2.09925e-203	2.04079e-201
Ank3	-1.83508	9.50018	969.222	4.75108e-203	4.60279e-201
Cox6c	-0.754522	11.8388	953.777	1.15114e-202	1.11137e-200
Arl6ip1	-1.3873	10.087	952.519	2.07524e-202	1.99665e-200
Mep1a	-2.09855	9.79523	945.791	4.86195e-201	4.66181e-199
Slc25a5	-1.04686	10.7037	944.093	1.07804e-200	1.03014e-198
Rpl36al	-1.15377	10.2953	937.489	2.38692e-199	2.27309e-197
Gpr137b	-1.86879	9.45333	1114.17	2.818e-199	2.67452e-197
Cox7c	-0.775884	11.4763	937.021	2.97217e-199	2.81131e-197
Smim4	-1.53868	9.74743	936.07	4.64494e-199	4.37875e-197
Zbp1	1.32458	9.26562	2012.8	7.97047e-199	7.4885e-197
mt-Co1	-1.12524	15.1134	933.079	1.88997e-198	1.76975e-196
Chd3	-1.79585	9.48637	1030.76	4.85891e-198	4.53466e-196
Rps5	-1.03412	10.8094	930.059	7.79742e-198	7.25289e-196
Slc7a13	-2.18754	9.53282	928.199	1.8672e-197	1.73105e-195
Xaf1	1.31942	9.29747	1734.68	2.51745e-197	2.32619e-195
Sec62	-1.47131	9.82572	927.055	3.19441e-197	2.94201e-195
Calml4	-1.57889	9.90489	926.849	3.51929e-197	3.23059e-195
Ddt	-1.43996	9.93451	925.723	5.97179e-197	5.46399e-195
Papss2	-1.78454	9.46599	919.799	9.64457e-196	8.79572e-194
Ndufb4	-1.07012	10.4318	917.997	2.24814e-195	2.04362e-193
Igfbp7	-1.2641	10.5686	917.664	2.62851e-195	2.38165e-193
Gm2a	-1.73969	9.61314	916.966	3.64893e-195	3.29558e-193
BC026585	-1.70738	9.52926	914.758	1.02975e-194	9.27037e-193
Cryl1	-1.7109	9.51663	920.172	6.32223e-194	5.67339e-192
Id2	-1.40094	10.3777	910.71	6.90033e-194	6.17238e-192
Hspd1	-1.55905	9.70612	909.652	1.13446e-193	1.01155e-191
Gcdh	-1.66064	9.52975	911.26	6.20205e-193	5.51254e-191
Hgd	-1.77416	9.47754	984.918	7.89733e-193	6.99714e-191
Sod3	-1.77325	9.50475	930.213	8.13759e-193	7.18726e-191
Itgb8	-1.80337	9.45106	976.345	8.28705e-193	7.29625e-191
Rab3ip	-1.64777	9.55954	945.787	1.29972e-192	1.14074e-190
Prelid1	-1.53138	9.69759	904.397	1.34222e-192	1.17436e-190
Folr1	-1.65941	9.75877	903.939	1.6644e-192	1.45171e-190
Pck1	-1.64075	11.0564	902.703	2.97655e-192	2.58812e-190
Nat8	-1.90056	9.71314	902.478	3.30899e-192	2.86827e-190
Rpl31	-1.03712	10.4759	901.924	4.29259e-192	3.70938e-190
Glyat	-1.57625	9.96152	900.953	6.77852e-192	5.83954e-190
Car4	-1.81595	9.45293	989.749	3.56326e-191	3.06025e-189
Rps6	-1.11649	10.6312	895.101	1.06317e-190	9.10297e-189
Lypla1	-1.6302	9.58194	893.324	2.45347e-190	2.09427e-188
Rpl3	-1.17487	10.422	890.359	9.90363e-190	8.42802e-188
Car12	-1.92037	9.47776	889.735	1.32823e-189	1.1269e-187
Rps9	-1.0209	10.6929	887.77	3.35024e-189	2.83384e-187
Sephs2	-1.52154	9.87103	886.317	6.63953e-189	5.5992e-187
Rbm47	-1.49679	9.76984	885.391	1.0267e-188	8.63228e-187
Col4a4	-1.70843	9.52818	884.375	1.65668e-188	1.38874e-186
Mrpl34	-1.503	9.63871	882.066	4.91374e-188	4.10671e-186
Cryz	-1.61895	9.60419	880.776	9.01809e-188	7.51454e-186
Rsrp1	-1.4814	9.95926	879.487	1.65507e-187	1.37504e-185
Cox6a1	-0.813813	11.154	878.255	2.95664e-187	2.44911e-185
Rtp4	1.23298	9.32537	1473.57	1.13765e-186	9.39582e-185
Srsf2	-1.53499	9.81182	875.133	1.2869e-186	1.05972e-184
Slc22a18	-1.72503	9.53384	874.126	2.06832e-186	1.69821e-184
Slc2a2	-1.80127	9.48237	896.667	3.70847e-186	3.03596e-184
Ccnd1	-1.82386	9.49131	872.651	4.14486e-186	3.38332e-184
Il1f6	1.05333	9.19796	7862.95	9.17774e-186	7.46972e-184
Mpv17l	-1.79731	9.49497	869.052	2.25977e-185	1.83388e-183
Fbp1	-1.51327	10.1257	863.558	3.01311e-184	2.43818e-182
Eci3	-1.79761	9.41001	1019.83	4.67102e-184	3.76886e-182
Sdhd	-1.48299	9.66779	857.682	4.81318e-183	3.8724e-181
Sox9	1.26752	9.23197	2840.41	6.84004e-183	5.48732e-181
Gcsh	-1.70979	9.46993	979.922	6.36724e-181	5.09343e-179
Erich4	-1.74194	9.44284	969.549	1.88713e-180	1.5053e-178
Dnase1	-1.94527	9.69057	843.938	3.15706e-180	2.51112e-178
Slc17a1	-1.62177	9.82705	842.846	5.28797e-180	4.19412e-178
Bphl	-1.57427	9.61306	841.154	1.17576e-179	9.29912e-178
Cisd1	-1.10699	10.3175	839.757	2.27369e-179	1.79321e-177
Eef1g	-1.42078	9.74994	839.5	2.56819e-179	2.01978e-177
Fahd1	-1.59126	9.51674	854.612	1.92632e-178	1.51073e-176
Gpd1	-1.71327	9.54363	871.035	8.47778e-178	6.6302e-176
Kcnj15	-1.5668	9.87278	829.234	3.28119e-177	2.55896e-175
Ptms	-1.34815	9.82709	825.527	1.89253e-176	1.47186e-174
Ugt3a1	-1.79934	9.53616	823.908	4.06751e-176	3.15463e-174
Atp5j	-0.825231	11.0063	820.552	1.98912e-175	1.53843e-173
Cisd3	-1.54952	9.55298	819.237	3.70341e-175	2.85642e-173
Col4a3	-1.72641	9.44783	927.845	1.92875e-174	1.48355e-172
Ccser2	-1.70962	9.4623	934.973	3.98479e-174	3.0566e-172
Aldh9a1	-1.70044	9.47482	916.809	4.87346e-174	3.72806e-172
Slc22a1	-1.68375	9.4895	872.744	5.10682e-174	3.89593e-172
Abcc2	-1.72262	9.454	881.026	7.25401e-174	5.51896e-172
Ndufa13	-0.835377	10.7149	808.691	5.43946e-173	4.12721e-171
Asl	-1.6831	9.48579	858.323	7.10368e-173	5.37537e-171
Pcyt2	-1.76535	9.46349	988.716	7.65405e-173	5.77623e-171
0610011F06Rik	-1.42085	9.77019	804.846	3.35777e-172	2.52717e-170
Higd2a	-1.20537	9.92751	803.905	5.24366e-172	3.93598e-170
Nox4	-1.69458	9.61021	803.668	5.86413e-172	4.38994e-170
Tmem229a	-1.6948	9.43902	893.253	8.4029e-172	6.27372e-170
Gm10053	1.07348	9.56856	800.512	2.61371e-171	1.94624e-169
Ndufs6	-1.07415	10.138	799.12	5.05316e-171	3.75274e-169
Uba52	-0.971686	10.5057	796.551	1.70661e-170	1.26406e-168
Tcn2	-1.35732	10.1791	788.659	7.18041e-169	5.30441e-167
Igfbp4	-1.51316	9.91673	787.812	1.07277e-168	7.90405e-167
Msra	-1.52011	9.61657	784.117	6.18188e-168	4.54279e-166
Slc5a8	-1.84897	9.54255	782.335	1.43925e-167	1.05487e-165
Aspdh	-1.70902	9.4125	957.883	1.81637e-167	1.3278e-165
Grhpr	-1.52851	9.55702	781.744	1.90423e-167	1.3884e-165
Tmem256	-1.1346	10.0979	780.879	2.87067e-167	2.08761e-165
Dhrs4	-1.52757	9.56916	780.432	3.54823e-167	2.57366e-165
Macrod2	-1.66939	9.42691	909.807	9.19616e-167	6.65308e-165
Bola3	-1.29876	9.83726	777.895	1.18188e-166	8.52842e-165
Ogt	-1.55856	9.56917	777.036	1.776e-166	1.27826e-164
Zmynd10	-1.69853	9.35781	1153.15	2.03297e-166	1.45946e-164
Fah	-1.54741	9.56176	775.039	4.581e-166	3.28028e-164
Usp2	-1.72685	9.42729	954.404	6.50008e-166	4.64258e-164
Gas6	-1.56026	9.55305	812.589	1.89077e-165	1.34702e-163
Me1	-1.57955	9.54777	771.267	2.7423e-165	1.94871e-163
Ahcyl2	-1.67399	9.44146	923.661	2.80522e-165	1.98837e-163
Stra13	-1.43563	9.6288	769.156	7.46704e-165	5.27935e-163
G6pc	-1.73745	9.8711	768.237	1.15513e-164	8.14641e-163
Cth	-1.6939	9.3784	1009.52	4.92795e-164	3.46665e-162
Napsa	-1.91884	9.89975	762.544	1.72294e-163	1.209e-161
Orm1	1.06764	9.20906	3195.64	2.61293e-163	1.82892e-161
Cox7a2l	-1.31355	9.78408	761.568	2.73904e-163	1.91241e-161
Mettl7a1	-1.62147	9.47587	838.365	3.54384e-163	2.46817e-161
Atp1b1	-1.19069	11.0284	760.63	4.27664e-163	2.97115e-161
Trps1	-1.66683	9.41392	893.884	9.06779e-162	6.28416e-160
Ndufab1	-1.07039	10.1402	752.606	1.93348e-161	1.33663e-159
Slc25a51	-1.53119	9.51257	792.841	9.02123e-161	6.22109e-159
Rpl34	-0.91173	10.662	748.642	1.27179e-160	8.74877e-159
St13	-1.33524	9.75576	748.55	1.32848e-160	9.11639e-159
Atp5f1	-1.10302	10.0671	748.134	1.61938e-160	1.10854e-158
Tnfrsf21	-1.53952	9.54686	747.021	2.7482e-160	1.87669e-158
Haao	-1.66967	9.37707	1017.41	5.33833e-160	3.63656e-158
Acsm3	-1.73322	9.43764	744.984	7.23626e-160	4.9175e-158
Psmb10	1.16544	9.35092	989.378	2.33258e-159	1.5813e-157
Ftl1	-0.893721	13.3174	742.27	2.62933e-159	1.77816e-157
Pbld2	-1.61749	9.47333	853.05	3.26333e-159	2.2016e-157
Rps18	-0.827781	11.103	741.36	4.05409e-159	2.72852e-157
Slc25a39	-1.38516	9.70231	740.533	6.00623e-159	4.03268e-157
Hint1	-0.930967	10.6684	740.329	6.61919e-159	4.43359e-157
Cd36	-1.81056	9.626	739.823	8.41822e-159	5.62514e-157
Snhg18	-1.44134	9.70138	737.871	2.1307e-158	1.42037e-156
Csad	-1.66185	9.39809	894.245	1.64198e-157	1.09197e-155
Fmo2	-1.66647	9.39761	945.029	4.49749e-157	2.98391e-155
Cyp24a1	-1.90731	9.47595	754.89	5.69994e-157	3.77274e-155
Cox5b	-0.806362	10.8214	730.94	5.76153e-157	3.80451e-155
Sardh	-1.65077	9.42631	900.701	8.55416e-157	5.63528e-155
Cox5a	-0.880366	10.5684	729.557	1.11279e-156	7.31359e-155
Acat1	-1.38951	9.67913	727.347	3.18552e-156	2.08871e-154
Cotl1	-1.61462	9.53415	731.676	3.83052e-156	2.50577e-154
Slc22a8	-1.6499	9.49293	723.503	1.98496e-155	1.29545e-153
Pnisr	-1.57616	9.5036	768.073	2.89732e-155	1.88649e-153
Gnas	-1.2788	9.85555	721.4	5.40469e-155	3.51092e-153
Pebp1	-1.11175	10.0665	721.039	6.41754e-155	4.15922e-153
Son	-1.36968	9.66901	720.05	1.02768e-154	6.64505e-153
Suclg1	-1.2769	9.76074	719.689	1.22083e-154	7.87577e-153
Ndufa10	-1.35436	9.61697	719.296	1.47191e-154	9.47371e-153
Snx29	-1.7129	9.38423	939.955	2.26948e-154	1.45736e-152
Spr	-1.45615	9.52233	755.69	4.67314e-154	2.99402e-152
Gabarap	-0.990254	10.2053	714.034	1.80489e-153	1.15373e-151
Acox1	-1.40156	9.98078	712.67	3.45585e-153	2.20403e-151
Abcg2	-1.48665	9.66138	710.198	1.12225e-152	7.14107e-151
Gbp6.1	1.09098	9.26237	1786.19	4.77974e-152	3.03454e-150
Rps19	-0.772165	11.4279	706.235	7.41997e-152	4.7001e-150
Serf2	-0.722266	10.881	705.636	9.87236e-152	6.23942e-150
Vegfa	-1.62376	9.43069	841.69	1.0627e-151	6.70121e-150
Idh1	-1.44479	9.88244	705.226	1.20066e-151	7.5542e-150
Tef	-1.66721	9.39122	961.811	1.3552e-151	8.50735e-150
Uqcrfs1	-1.11134	10.0154	703.835	2.33025e-151	1.45956e-149
Tapbp	1.04558	9.47115	703.718	2.46382e-151	1.53978e-149
Smdt1	-0.956614	10.2148	701.547	6.93538e-151	4.32465e-149
Slc6a20b	-1.64319	9.36387	1010.39	4.51779e-150	2.81087e-148
Mmp7	0.984703	9.19792	5672.46	1.47257e-149	9.14167e-148
Rpl27	-0.98876	10.2775	694.476	2.02252e-149	1.2528e-147
Aldh4a1	-1.53967	9.45677	779.783	2.12005e-149	1.31031e-147
Cks2	-1.4775	9.52819	693.41	9.37543e-149	5.78179e-147
Tpt1	-0.780948	11.419	690.311	1.47545e-148	9.07905e-147
Lipa	-1.58096	9.4248	789.51	5.71069e-148	3.50631e-146
Naca	-1.07841	10.069	686.872	7.61582e-148	4.66581e-146
Map2k2	-1.47761	9.50886	785.67	1.10485e-147	6.75406e-146
Smarca2	-1.54365	9.44178	798.764	1.81365e-147	1.10629e-145
Snhg11	-1.75099	9.44515	684.664	2.18554e-147	1.33023e-145
Oxct1	-1.31103	9.91538	683.191	4.41369e-147	2.68058e-145
Mien1	-1.27195	9.68113	680.743	1.42086e-146	8.61066e-145
Tmem150a	-1.63424	9.41054	877.06	1.24659e-145	7.53826e-144
Atp5o	-1.00767	10.1914	676.152	1.27313e-145	7.68212e-144
Atp6v1e1	-1.24063	9.78006	675.749	1.54325e-145	9.29202e-144
Txndc17	-1.22373	9.78731	675.512	1.72797e-145	1.03819e-143
Cox20	-1.31686	9.62244	675.379	1.84105e-145	1.10376e-143
Col27a1	-1.63491	9.39292	833.302	2.68333e-145	1.6053e-143
Slco1a6	-1.5177	9.50321	673.956	3.63406e-145	2.16944e-143
Atp6v1a	-1.32615	9.8445	671.926	9.58605e-145	5.71043e-143
Neat1	-1.33876	10.4729	671.516	1.16595e-144	6.93087e-143
Pgam1	-1.28466	9.67937	671.33	1.27444e-144	7.55972e-143
Slc3a1	-1.5888	9.41056	806.498	5.14531e-144	3.04563e-142
Myeov2	-1.04764	9.97856	665.37	2.19987e-143	1.29941e-141
Tsc22d1	0.938515	10.154	664.274	3.716e-143	2.19033e-141
Chchd3	-1.5042	9.45711	799.474	4.5151e-143	2.65575e-141
Mocs2	-1.37355	9.52519	666.439	5.62976e-143	3.30444e-141
Atp1a1	-1.20876	10.9162	663.146	6.37015e-143	3.7312e-141
Tprkb	-1.59611	9.42799	827.564	7.49615e-143	4.38157e-141
Kcnj16	-1.35444	9.69306	662.407	9.07245e-143	5.29189e-141
Adhfe1	-1.47628	9.45554	740.149	1.01392e-142	5.90183e-141
Sdhc	-1.2749	9.63917	661.193	1.62079e-142	9.4147e-141
Nme2	-1.40223	9.52979	659.729	3.26427e-142	1.89219e-140
Polr3e	-1.42986	9.60798	658.232	6.6796e-142	3.86395e-140
Ugt3a2	-1.47687	9.96104	657.598	9.04595e-142	5.22203e-140
Uqcrq	-0.70417	11.09	656.804	1.3223e-141	7.61766e-140
Bhmt2	-1.56039	9.33973	973.23	1.51484e-141	8.70893e-140
Ttr	-2.07968	9.69724	655.074	3.02547e-141	1.7358e-139
Ndufb5	-1.05313	9.98929	654.626	3.74896e-141	2.14649e-139
Iah1	-1.34812	9.60105	654.396	4.18537e-141	2.39147e-139
Mif	-0.955043	10.704	653.462	6.54372e-141	3.73138e-139
Cldn2	-1.447	9.6667	652.188	1.2035e-140	6.84868e-139
Slc25a4	-1.29061	9.85738	652.134	1.23488e-140	7.01299e-139
Srsf5	-1.26201	9.70379	650.139	3.20886e-140	1.81865e-138
Camk2n1	-1.34881	9.59964	649.869	3.65006e-140	2.06453e-138
Coa6	-1.4787	9.44476	754.366	4.40351e-140	2.48567e-138
Anapc13	-1.0487	10.0159	648.613	6.66071e-140	3.75224e-138
Thnsl2	-1.54182	9.41313	811.936	1.08369e-139	6.09257e-138
Ndufc1	-0.883753	10.4133	645.76	2.60988e-139	1.46436e-137
Adra2b	-1.60094	9.40947	815.298	5.57299e-139	3.12065e-137
Ndufc2	-1.00477	10.0564	641.794	1.7429e-138	9.74008e-137
Sod1	-1.32977	9.72532	640.748	2.87609e-138	1.60408e-136
Samhd1	1.09149	9.32694	890.59	3.60833e-138	2.00847e-136
Ap2a2	-1.50135	9.47629	762.319	3.68829e-138	2.0489e-136
2410015M20Rik	-0.990744	10.0851	638.836	7.18447e-138	3.98318e-136
Aldoa	-1.02971	10.2217	638.25	9.51007e-138	5.26211e-136
Far1	-1.38491	9.50496	638.178	9.84681e-138	5.43769e-136
Rps27	-0.729752	11.4137	637.232	1.54927e-137	8.53865e-136
BC005561	-1.49083	9.44616	683.486	4.9897e-137	2.74463e-135
Tmsb10	1.33747	10.2334	634.669	5.28814e-137	2.90308e-135
Susd3	-1.55525	9.36657	891.923	8.597e-137	4.71035e-135
Rpl5	-1.10027	9.92328	632.575	1.44216e-136	7.88626e-135
Mrpl42	-1.12289	9.86852	630.137	4.63842e-136	2.53151e-134
Ldhd	-1.41629	9.63122	630.122	4.67172e-136	2.54432e-134
Mcee	-1.32726	9.53268	645.513	4.68007e-136	2.54432e-134
Car14	-1.57348	9.37212	863.159	1.1732e-135	6.36574e-134
Acox3	-1.54225	9.4131	755.42	1.49423e-135	8.09196e-134
Slc9a3r1	-1.30258	9.5451	627.671	1.5124e-135	8.17454e-134
Acss2	-1.54551	9.35053	932.507	1.56285e-135	8.43095e-134
Ubb	0.651083	11.2809	625.248	4.83036e-135	2.60078e-133
Gdi2	-1.25508	9.60111	623.237	1.26704e-134	6.80893e-133
Ak3	-1.46053	9.44015	750.995	2.28798e-134	1.22718e-132
Gss	-1.45643	9.45363	694.258	2.62682e-134	1.40623e-132
Ndufa3	-0.728994	10.654	619.387	8.02656e-134	4.28869e-132
Rpl12	-1.18098	9.91139	615.195	5.99542e-133	3.19733e-131
Slco1a1	-1.56635	9.38594	677.907	1.22939e-132	6.54379e-131
Nit1	-1.46154	9.41912	748.099	2.26596e-132	1.20384e-130
Gm10269	1.17144	9.22807	2035.28	3.92574e-132	2.08168e-130
Fhl1	-1.50989	9.37025	837.273	5.00509e-132	2.64901e-130
Slc12a1	-2.33969	9.90566	610.453	5.83428e-132	3.08204e-130
Nmrk1	-1.52478	9.42007	724.312	6.51721e-132	3.43632e-130
Phb2	-1.30194	9.555	654.909	7.64402e-132	4.02288e-130
Minos1	-0.867052	10.2761	609.864	7.74128e-132	4.06642e-130
Cyb5b	-1.2703	9.55684	609.401	9.66555e-132	5.06772e-130
H3f3a	-1.04927	10.1175	608.417	1.55002e-131	8.11167e-130
Fuca1	-1.26048	9.59926	605.607	5.97409e-131	3.12057e-129
Mlec	-1.30918	9.56027	604.485	1.02361e-130	5.33687e-129
Rps28	-0.762291	10.8493	604.403	1.06499e-130	5.54232e-129
Lrpap1	-1.30523	9.58945	603.672	1.51275e-130	7.85788e-129
Pank1	-1.41105	9.57028	603.287	1.81929e-130	9.43269e-129
Pipox	-1.4788	9.41988	748.681	1.87884e-130	9.72344e-129
Ncor1	-1.33597	9.50489	626.886	4.11661e-130	2.12651e-128
Myo6	-1.30791	9.5383	600.272	7.74107e-130	3.99143e-128
Mrpl18	-1.30899	9.5158	623.901	8.33123e-130	4.28782e-128
Wwp1	-1.43292	9.42472	696.039	1.20873e-129	6.20954e-128
Pxmp2	-1.49644	9.36163	845.59	2.38982e-129	1.22546e-127
Eef1b2	-1.22358	9.65808	597.618	2.76933e-129	1.41747e-127
Hint2	-1.00369	10.1211	596.277	5.27439e-129	2.69475e-127
Txn2	-1.21432	9.61963	595.615	7.24634e-129	3.6955e-127
G0s2	-1.58664	9.68051	595.322	8.34443e-129	4.24777e-127
Osbpl9	-1.31912	9.49415	611.761	2.05652e-128	1.04498e-126
Iscu	-1.02435	9.99636	590.652	7.86732e-128	3.99038e-126
P4hb	-1.32237	9.56041	590.271	9.44759e-128	4.78325e-126
Atp5l	-0.633097	11.2045	589.622	1.2906e-127	6.52243e-126
Chka	-1.4582	9.46892	589.617	1.29374e-127	6.5265e-126
Cgref1	-1.41342	9.44506	645.318	2.24883e-127	1.13242e-125
Rps20	-0.869642	10.472	588.264	2.47899e-127	1.24608e-125
Ogdh	-1.26966	9.59269	588.135	2.6376e-127	1.32343e-125
Aldh2	-1.21316	9.72767	587.59	3.42813e-127	1.71701e-125
Errfi1	-1.19658	10.2302	583.614	2.31871e-126	1.15927e-124
Ephx2	-1.34779	9.49359	582.018	4.99518e-126	2.49296e-124
Spag9	-1.41513	9.42671	687.668	6.52968e-126	3.25299e-124
Ldha	-1.109	9.88405	581.406	6.70281e-126	3.33331e-124
Eif4g2	-1.01372	9.9918	581.159	7.54772e-126	3.74683e-124
Ndufa8	-1.04347	9.85586	580.028	1.30079e-125	6.44592e-124
Luc7l2	-1.29234	9.55665	579.101	2.03081e-125	1.00457e-123
Prdx6	-1.20873	9.59391	579.049	2.08271e-125	1.02842e-123
Psme2b	1.09962	9.23066	1959.92	3.14957e-125	1.55249e-123
Hebp1	-1.41822	9.41863	690.317	4.73094e-125	2.32789e-123
Cmip	-1.38696	9.45382	656.79	6.64398e-125	3.26347e-123
Zfp706	-1.01628	10.002	573.98	2.38547e-124	1.16967e-122
Cyp2d26	-1.57423	9.42488	641.852	2.42993e-124	1.18939e-122
Upb1	-1.4734	9.39252	758.595	2.47326e-124	1.20849e-122
Acaa2	-1.34067	9.53152	597.226	5.64882e-124	2.75533e-122
Prss8	-1.36343	9.51441	607.505	1.08316e-123	5.27413e-122
0610012G03Rik	-1.13967	9.67825	570.467	1.29359e-123	6.28785e-122
Ppa2	-1.34469	9.46684	644.685	1.85942e-123	9.02254e-122
Cyp2j13	-1.45795	9.33227	870.075	2.70191e-123	1.30879e-121
Canx	-1.15124	9.80736	568.411	3.48026e-123	1.68291e-121
Rnf5	-1.33044	9.46919	643.789	5.60803e-123	2.70713e-121
Gm10116	0.862033	10.197	564.692	2.08481e-122	1.00466e-120
Fkbp4	-1.39169	9.44455	695.723	4.55215e-122	2.18988e-120
Mlxipl	-1.41884	9.4277	604.379	5.02115e-122	2.41136e-120
Prodh	-1.39042	9.45464	642.741	6.93686e-122	3.32565e-120
Trim7	-1.44545	9.39512	668.704	1.01277e-121	4.84711e-120
Frmd4b	-1.46081	9.38172	722.247	1.20322e-121	5.74875e-120
Ndufs7	-1.02691	9.89707	560.016	1.98189e-121	9.453e-120
Ndufa7	-0.783879	10.3585	559.748	2.25535e-121	1.0739e-119
Picalm	-1.23281	9.53681	559.4	2.66688e-121	1.2677e-119
Tomm7	-0.903748	10.0616	556.92	8.80378e-121	4.17777e-119
Ugt2b38	-1.30403	9.84978	555.433	1.80246e-120	8.53898e-119
2020-09-15	-1.10953	9.69758	554.238	3.20651e-120	1.51648e-118
Gchfr	-1.39603	9.38684	674.71	8.84571e-120	4.17643e-118
Eps8	-1.407	9.40489	651.86	9.04376e-120	4.26275e-118
Timm8b	-1.02328	9.87976	552.031	9.28636e-120	4.36974e-118
Ppp1r16b	-1.43442	9.33191	860.707	3.58096e-119	1.68221e-117
Ndufs5	-0.945701	9.98974	547.715	7.43409e-119	3.48254e-117
Mrfap1	-1.16209	9.6048	547.714	7.43825e-119	3.48254e-117
Nupr1	1.0758	9.29173	793.089	8.81297e-119	4.11929e-117
Lrg1	0.892751	9.33729	716.246	1.48329e-118	6.92153e-117
Aass	-1.31436	9.64751	545.738	1.92837e-118	8.98344e-117
Tgtp2	0.91453	9.20764	3647.02	2.6702e-118	1.24186e-116
Ost4	-0.947378	10.0278	540.988	1.90503e-117	8.84526e-116
Bsg	-0.986222	9.92571	540.783	2.10287e-117	9.7477e-116
Kif12	-1.41149	9.40557	677.042	2.17295e-117	1.00559e-115
Trabd2b	-1.45714	9.34369	837.25	2.87178e-117	1.3268e-115
2300009A05Rik	-1.32425	9.46575	625.162	3.05739e-117	1.41023e-115
Hlf	-1.45687	9.33713	866.547	3.0629e-117	1.41045e-115
Rbpms2	-1.36057	9.42588	640.015	4.9364e-117	2.26945e-115
Tomm20	-0.981023	9.98405	538.677	5.80821e-117	2.66587e-115
1110001J03Rik	-1.0883	9.74031	536.934	1.34683e-116	6.17159e-115
Clk1	-1.32658	9.46028	590.342	2.04737e-116	9.3664e-115
Gpx1	-0.859453	12.103	535.331	2.91753e-116	1.33255e-114
Gpi1	-1.24727	9.55203	564.932	3.57182e-116	1.62873e-114
Prkaa2	-1.35497	9.42241	638.071	6.19093e-116	2.81843e-114
Gm15638	-1.40455	9.32613	859.568	7.82097e-116	3.55473e-114
Tmem205	-1.2528	9.64492	532.492	1.1483e-115	5.2107e-114
Hsd3b2	-1.3908	9.31573	949.155	1.98416e-115	8.98907e-114
Ivns1abp	-1.07358	9.97832	530.611	2.84683e-115	1.28765e-113
Slc26a1	-1.42213	9.32585	886.091	4.97728e-115	2.24764e-113
Eif3h	-1.17166	9.57982	529.315	5.32063e-115	2.39883e-113
Msrb1	-1.07442	10.1508	528.194	9.14202e-115	4.11508e-113
Slc7a7	-1.40283	9.40919	594.603	2.11445e-114	9.50246e-113
Alpl	-1.43965	9.46419	598.197	2.21662e-114	9.94568e-113
Ar	-1.41807	9.34102	786.383	3.89949e-114	1.74685e-112
Pabpc1	-1.16321	9.68276	524.568	5.26346e-114	2.3541e-112
Serping1	0.993703	9.22422	1964.14	7.49634e-114	3.34741e-112
Serpinb9	1.08598	9.27366	842.508	1.38749e-113	6.1858e-112
Ndufb3	-0.935739	9.94592	522.322	1.557e-113	6.93052e-112
Rbm25	-1.29196	9.46699	576.692	2.86395e-113	1.27278e-111
Pdk2	-1.39402	9.39112	715.53	2.92094e-113	1.29604e-111
Entpd5	-1.33309	9.46481	567.567	2.99073e-113	1.32491e-111
Cda	-1.14461	9.94605	520.838	3.18957e-113	1.41077e-111
Bpnt1	-1.16831	9.61288	519.37	6.47915e-113	2.86125e-111
Igfbp5	-1.46979	9.34107	698.016	9.02749e-113	3.98034e-111
Ptprd	-1.40977	9.37342	706.493	1.63994e-112	7.21933e-111
Coq9	-1.34092	9.42964	648.886	2.4969e-112	1.09746e-110
Slc1a1	-1.34332	9.41094	598.382	3.03903e-112	1.33365e-110
Cpn1	-1.41067	9.39339	630.024	3.27218e-112	1.43372e-110
Clta	-1.11144	9.66589	515.604	3.99647e-112	1.74833e-110
Rdh16	-1.41299	9.3436	771.961	6.15751e-112	2.68952e-110
Wnk1	-1.68254	9.83215	514.509	6.78554e-112	2.95922e-110
Bst2	0.925597	9.52652	512.474	1.81359e-111	7.89689e-110
Osbpl6	-1.42164	9.35942	755.361	2.0732e-111	9.01326e-110
Scoc	-1.26196	9.45943	574.699	2.19725e-111	9.53776e-110
Hdgf	-1.1757	9.5356	517.383	3.48076e-111	1.50858e-109
Rps14	-0.602535	11.2329	508.655	1.14899e-110	4.97207e-109
Idh2	-1.17136	9.67226	507.927	1.63355e-110	7.05807e-109
Polr1d	-1.09698	9.6224	507.662	1.857e-110	8.01115e-109
Ctsl	0.87885	9.85116	507.069	2.474e-110	1.06565e-108
Glyctk	-1.38828	9.32602	839.283	2.76501e-110	1.18917e-108
Cltc	-1.13491	9.60483	506.449	3.33877e-110	1.43373e-108
Fam132a	-1.37855	9.35956	721.581	3.94283e-110	1.69053e-108
Lamtor4	-1.07354	9.66582	505.821	4.52266e-110	1.93617e-108
Tmem14c	-1.23484	9.51683	560.427	5.44155e-110	2.32599e-108
Gnb2l1	-1.03208	9.84434	504.9	7.06081e-110	3.01355e-108
Epn1	-1.30179	9.46138	602.625	7.71272e-110	3.28677e-108
Nisch	-1.23978	9.50544	552.145	9.97876e-110	4.24598e-108
Gpx3	-0.948678	14.4511	503.319	1.51661e-109	6.44341e-108
Rab14	-1.12336	9.58067	501.915	2.99084e-109	1.26875e-107
Tst	-1.36256	9.39335	654.143	3.88153e-109	1.6441e-107
Ube2l6	0.962275	9.25021	1400.74	4.26537e-109	1.80396e-107
Ech1	-1.02257	9.86755	498	1.98746e-108	8.39289e-107
Cebpb	0.920064	10.0153	497.566	2.45127e-108	1.0336e-106
Kcnk5	-1.35083	9.38416	622.354	2.75464e-108	1.15977e-106
Psme2	0.920056	9.50495	497.14	3.01265e-108	1.26649e-106
Xdh	0.996036	9.2633	1129.31	4.40267e-108	1.84807e-106
Sypl	-1.152	9.58485	495.641	6.2229e-108	2.60821e-106
Pura	-1.25167	9.46953	540.476	1.10528e-107	4.62565e-106
Slc6a18	-1.38485	9.51199	493.305	1.92658e-107	8.05078e-106
Mapt	-1.39148	9.3413	779.983	2.26471e-107	9.44969e-106
Atp11a	-1.3475	9.62167	492.146	3.37626e-107	1.40667e-105
Eif3f	-1.12522	9.65825	492.006	3.6141e-107	1.50353e-105
Hagh	-1.06353	9.69076	491.353	4.95737e-107	2.0593e-105
Prodh2	-1.39589	9.34392	732.441	5.3261e-107	2.20919e-105
Timm13	-0.869749	10.0386	490.899	6.17418e-107	2.55717e-105
Ndel1	-1.35243	9.35599	715.945	2.02827e-106	8.38811e-105
Ugt8a	-1.34492	9.33626	729.19	2.15398e-106	8.89487e-105
Lamp1	-0.908761	10.0987	488.275	2.19953e-106	9.06956e-105
Nipsnap1	-1.35255	9.36063	712.976	2.53944e-106	1.04558e-104
Atp2a2	-1.16627	9.61971	487.935	2.59334e-106	1.0662e-104
Slc25a11	-1.34974	9.42475	651.035	2.83749e-106	1.16487e-104
2610528J11Rik	-1.3447	9.40568	639.983	5.53812e-106	2.27022e-104
Agps	-1.34493	9.36177	638.382	9.08217e-106	3.71758e-104
Park7	-0.815477	10.4295	485.11	1.01824e-105	4.16187e-104
C3	0.843358	9.36965	597.48	1.16871e-105	4.76991e-104
4430402I18Rik	-1.338	9.31484	801.614	1.60931e-105	6.55858e-104
Vdr	-1.30399	9.41662	574.507	4.25547e-105	1.73175e-103
Hypk	0.871658	9.51533	482.128	4.31576e-105	1.75374e-103
Eif4a2	-1.00891	9.76797	479.242	1.74698e-104	7.08869e-103
Fuca2	-1.21121	9.47279	504.648	1.91124e-104	7.74396e-103
Dhcr24	-1.2837	9.42727	546.094	4.52591e-104	1.83116e-102
Skp1a	-1.02346	9.71453	477.025	5.11416e-104	2.06618e-102
Rgl1	-1.32442	9.36004	668.488	5.98726e-104	2.41544e-102
Rnf187	-1.23413	9.46227	563.328	6.77909e-104	2.73095e-102
Uqcrc1	-1.00338	9.76284	476.342	7.11806e-104	2.86338e-102
Selt	-1.09843	9.57945	475.936	8.66864e-104	3.48213e-102
Sostdc1	-1.671	9.47462	475.817	9.18252e-104	3.68327e-102
Cideb	-1.28782	9.41589	580.638	1.03487e-103	4.14509e-102
Bag1	-1.02914	9.75873	475.495	1.07347e-103	4.29356e-102
Slc23a1	-1.37679	9.33722	745.465	1.09032e-103	4.35474e-102
Snx3	-1.08045	9.59216	474.986	1.37358e-103	5.47829e-102
Arhgap24	-1.38754	9.36736	684.647	2.4187e-103	9.62447e-102
Pabpn1	-1.42064	9.36398	718.109	2.42004e-103	9.62447e-102
Gatad1	-1.25128	9.43962	556.314	2.58255e-103	1.02562e-101
Sepw1	0.930334	9.73801	473.243	3.19707e-103	1.26787e-101
Shmt2	-1.35199	9.3549	710.34	3.91326e-103	1.54969e-101
Tm2d2	-1.24539	9.44822	564.126	5.48339e-103	2.16842e-101
Slc22a2	-1.32302	9.3225	728.778	7.65863e-103	3.02435e-101
Rdx	-1.20577	9.47185	524.621	9.2784e-103	3.65883e-101
Oasl2	0.930429	9.26157	1147	9.88745e-103	3.89351e-101
Srsf11	-1.2098	9.4795	519.607	1.13771e-102	4.47383e-101
Ndufs2	-1.02464	9.67923	469.339	2.12111e-102	8.32914e-101
Atxn7l3b	-1.21958	9.46208	532.229	2.51222e-102	9.85112e-101
Them7	-1.20581	9.42939	498.509	3.09369e-102	1.21143e-100
Igf1r	-1.18631	9.48072	470.133	6.15557e-102	2.40703e-100
Abhd17c	-1.14859	9.50839	483.676	6.91398e-102	2.69983e-100
Mrpl30	-1.02353	9.67022	466.594	8.02819e-102	3.13055e-100
Cpeb4	-1.22	9.44713	518.605	1.50036e-101	5.84242e-100
Trp53bp2	-1.31031	9.36686	646.876	1.97116e-101	7.66508e-100
Tob1	-1.17576	9.51085	463.387	3.80247e-101	1.47658e-99
Pim3	-1.15705	9.56364	462.946	4.71056e-101	1.82668e-99
Dgat2	-1.34208	9.37545	650.491	5.25871e-101	2.03642e-99
Tmbim6	-0.831083	10.2529	462.575	5.6369e-101	2.17986e-99
Slc30a9	-1.2937	9.38625	630.393	9.06731e-101	3.50161e-99
Hibadh	-0.976661	9.87899	461.345	1.02387e-100	3.94853e-99
Tmem213	1.10928	9.74034	460.793	1.33832e-100	5.15411e-99
Plscr2	-0.934384	9.96457	460.361	1.65051e-100	6.34766e-99
Mpst	-1.31105	9.33269	734.558	2.17993e-100	8.37225e-99
Tma7	-0.867893	9.97592	458.494	4.08237e-100	1.56573e-98
Cox14	-0.919169	9.8311	458.436	4.19831e-100	1.60799e-98
Hsd3b3	-1.33108	9.31181	821.271	6.71998e-100	2.5703e-98
Gm4950	0.996338	9.21734	1882.3	7.577e-100	2.89414e-98
Sgk1	-1.33546	9.61777	456.777	9.39335e-100	3.58304e-98
Map1lc3a	-1.04065	9.63558	456.696	9.77111e-100	3.72206e-98
Ifit3	0.721947	9.58183	645.875	1.38914e-99	5.2844e-98
Slc16a9	-1.25269	9.29364	824.198	1.50157e-99	5.70434e-98
Lrrk2	-1.2964	9.31531	770.932	1.88628e-99	7.15612e-98
Aldh8a1	-1.20497	9.46556	495.276	2.10571e-99	7.97776e-98
Cpox	-1.30936	9.35568	660.841	3.24601e-99	1.22813e-97
Cp	0.986206	9.24982	968.973	3.25607e-99	1.23027e-97
Smim10l1	-1.18697	9.45644	521.519	4.69698e-99	1.77232e-97
Ndufb7	-0.80559	10.0553	452.597	7.14409e-99	2.69206e-97
Cxcl9	0.655379	9.2247	1782.21	1.26075e-98	4.7444e-97
Dnaja1	-1.0503	9.6412	448.384	5.52159e-98	2.07508e-96
Idh3b	-1.18457	9.47099	517.699	5.96722e-98	2.23955e-96
Aldh7a1	-1.20001	9.44331	507.123	9.92543e-98	3.72011e-96
Arf1	-1.01713	9.64125	447.039	1.06123e-97	3.97224e-96
Clcn3	-1.21482	9.43638	518.484	1.19384e-97	4.46264e-96
Hpn	-1.08288	9.58812	446.467	1.40106e-97	5.23025e-96
Dstn	-1.01734	9.72931	446.171	1.61723e-97	6.0292e-96
Nr1h4	-1.25707	9.39069	566.884	1.95861e-97	7.29219e-96
Sirt3	-1.27944	9.38256	617.237	4.06699e-97	1.51219e-95
Smim24	-1.29265	9.3868	586.786	4.50782e-97	1.67387e-95
Osbpl8	-1.27006	9.36037	609.533	6.34128e-97	2.35156e-95
Fam213a	-1.19383	9.43149	504.943	2.21349e-96	8.19752e-95
Gm44386	-1.2554	9.4043	555.658	3.68408e-96	1.36257e-94
Plekhb2	-1.22096	9.41621	546.564	4.60401e-96	1.70057e-94
Oaz2	-1.24626	9.41284	563.144	8.64347e-96	3.18841e-94
Uqcrc2	-1.09967	9.52704	460.686	1.1601e-95	4.27375e-94
Trim63	-1.27956	9.30702	790.525	1.23214e-95	4.53317e-94
Mut	-1.21061	9.41483	524.633	1.75603e-95	6.45214e-94
Slc6a19	-1.29563	9.54448	436.043	2.21709e-95	8.13554e-94
Trpc1	-1.29014	9.32841	673.696	4.27708e-95	1.56741e-93
Ptgr2	-1.27793	9.35603	651.228	4.37017e-95	1.59942e-93
Slc35a3	-1.25872	9.38798	563.624	1.32956e-94	4.85968e-93
Ces1d	-1.27225	9.40845	523.094	1.74639e-94	6.37491e-93
Echdc2	-1.19437	9.44707	499.943	2.41081e-94	8.78879e-93
Kcnq1ot1	-1.28253	9.3352	640.665	2.79653e-94	1.01817e-92
Mcur1	-1.1526	9.44634	489.732	5.1213e-94	1.86216e-92
Ifit1	0.599977	9.78675	517.867	5.25425e-94	1.90802e-92
Acad11	-1.28126	9.35277	645.073	7.34549e-94	2.66398e-92
Ubc	-0.837873	10.1874	428.591	8.30407e-94	3.00773e-92
Aco1	-1.20146	9.42726	505.822	1.09352e-93	3.95561e-92
Jun	-1.36429	9.65677	427.461	1.43839e-93	5.19641e-92
Aadat	-1.24442	9.32882	610.531	2.11217e-93	7.62069e-92
Cdh16	-1.11602	9.72843	426.067	2.83368e-93	1.02107e-91
Tmem27	-0.957159	10.6576	425.97	2.96968e-93	1.0687e-91
Actg1	-0.91883	10.381	424.764	5.33948e-93	1.91906e-91
Timm9	-1.2679	9.34911	646.729	6.37461e-93	2.28816e-91
Slco3a1	-1.24675	9.35426	582.285	1.34487e-92	4.82121e-91
Rpl15	-0.825826	10.1366	422.587	1.54011e-92	5.51407e-91
Smlr1	-1.24582	9.33512	638.778	3.61861e-92	1.29392e-90
PISD	-1.27936	9.38078	570.092	4.62742e-92	1.65253e-90
Slc6a6	-1.12447	9.68103	418.117	1.3551e-91	4.83313e-90
Slc6a13	-1.28409	9.32046	715.986	1.55383e-91	5.53486e-90
2200002D01Rik	0.906546	9.36903	484.916	1.58e-91	5.62096e-90
Ppp1r1a	-1.63463	9.77197	417.743	1.62574e-91	5.77634e-90
Plvap	-1.28012	9.32135	459.057	1.90913e-91	6.77462e-90
Calr	-0.966389	9.94744	417.278	2.03845e-91	7.22437e-90
Tap1	0.892628	9.2603	1070.64	2.20084e-91	7.79005e-90
Ppia	-0.626422	10.8421	416.589	2.85087e-91	1.00781e-89
Rab5c	-0.988241	9.60532	416.142	3.5441e-91	1.2513e-89
Edf1	-0.77912	10.0166	415.615	4.57961e-91	1.61486e-89
Ccdc6	-1.23196	9.34391	611.937	6.08105e-91	2.1416e-89
Idh3g	-1.0499	9.5253	430.77	1.15107e-90	4.04871e-89
Psap	-0.88906	10.3648	412.776	1.82437e-90	6.40888e-89
Sult1d1	-0.866424	10.5334	412.317	2.28191e-90	8.00612e-89
Gm4450	-1.22537	9.29265	843.387	3.17191e-90	1.11148e-88
Eef1d	-1.04429	9.52438	421.888	5.08135e-90	1.77834e-88
F830016B08Rik	0.631638	9.21091	2887.66	7.38396e-90	2.58098e-88
Dhrs3	-1.24969	9.37792	573.555	8.10691e-90	2.83014e-88
Cux1	-1.19152	9.40841	529.828	3.18372e-89	1.11006e-87
Kansl1l	-1.22456	9.35616	567.622	4.13975e-89	1.4416e-87
Serpinf2	-1.22986	9.3501	562.417	5.39363e-89	1.87591e-87
Slc7a9	-1.24378	9.37202	554.349	6.67377e-89	2.31827e-87
Chchd7	-1.11363	9.45568	459.866	8.4862e-89	2.9442e-87
Pcx	-1.10201	9.60922	404.661	9.49329e-89	3.28952e-87
Cyp4a31	-1.16676	9.69419	404.617	9.70221e-89	3.35776e-87
Csde1	-1.0104	9.54606	403.691	1.52333e-88	5.26546e-87
Gde1	-1.176	9.4235	507.897	1.88132e-88	6.49486e-87
Ifitm3	1.03254	10.1497	403.066	2.06498e-88	7.12012e-87
Slc16a4	-1.20247	9.29814	722.771	2.17927e-88	7.50493e-87
Ndufb2	-0.76398	10.0897	401.104	5.3718e-88	1.84766e-86
Tango2	-1.23048	9.35098	591.191	5.4294e-88	1.86518e-86
Nlrp6	-1.2006	9.29572	756.118	1.43125e-87	4.91079e-86
Pfdn5	-0.763806	10.0605	398.676	1.75383e-87	6.01025e-86
Grcc10	-0.926631	9.67577	398.453	1.95512e-87	6.69185e-86
Ahcyl1	-1.20146	9.37648	550.279	2.27608e-87	7.7809e-86
Sectm1b	0.942101	9.30105	606.217	3.43181e-87	1.17175e-85
Nit2	-1.17362	9.38445	519.802	4.10092e-87	1.39851e-85
Tmem37	-1.09564	9.46311	404.525	5.17745e-87	1.76348e-85
Romo1	-0.720097	10.1638	395.817	7.06614e-87	2.40386e-85
Isoc2a	-1.30626	9.32758	690.333	7.77049e-87	2.64027e-85
Rnf7	-0.980373	9.55638	395.494	8.27228e-87	2.80736e-85
Abcd3	-1.00744	9.64281	395.484	8.31343e-87	2.81791e-85
Fgf1	-1.23572	9.33173	589.421	8.79828e-87	2.97865e-85
Magt1	-1.16882	9.40464	498.976	1.31832e-86	4.45777e-85
Ndufb11	-0.736417	10.1281	393.877	1.82015e-86	6.14722e-85
Kxd1	-1.15237	9.42063	493.924	3.01414e-86	1.01675e-84
Pkhd1	-1.24192	9.3614	565.089	4.24878e-86	1.4315e-84
Atpif1	-0.656118	10.6719	392.079	4.37206e-86	1.47126e-84
Lrrc58	-1.03257	9.51372	391.753	5.12631e-86	1.72301e-84
Tmco1	-0.973861	9.62082	390.939	7.62413e-86	2.55948e-84
Chuk	-1.06508	9.47554	418.798	8.5579e-86	2.86951e-84
Lamtor5	-0.909157	9.72981	390.44	9.72266e-86	3.25616e-84
Slc37a4	-1.11796	9.46321	420.25	1.20459e-85	4.02941e-84
Kidins220	-1.19507	9.39974	507.449	1.33707e-85	4.46722e-84
1700011H14Rik	-1.07605	9.53307	389.689	1.40265e-85	4.68073e-84
Tmem106a	-1.20304	9.35993	544.133	1.76367e-85	5.87847e-84
Ifrd2	-1.19315	9.33233	596.195	2.92005e-85	9.72123e-84
Tomm5	-0.956451	9.62162	387.382	4.32112e-85	1.43685e-83
Slc7a8	-1.23032	9.38752	471.608	5.911e-85	1.96318e-83
Ppdpf	-0.988463	9.54535	386.334	7.20605e-85	2.39046e-83
AI317395	-1.20624	9.32362	618.209	7.31987e-85	2.42534e-83
Nktr	-1.13564	9.42891	447.658	1.08542e-84	3.59215e-83
Tmem8	-1.21057	9.34794	576.366	1.30447e-84	4.31198e-83
Tra2b	-1.02957	9.51812	384.486	1.77469e-84	5.85941e-83
Fkbp8	-1.07113	9.48577	437.793	1.85217e-84	6.10801e-83
Wls	-1.04798	9.52771	384.393	1.85773e-84	6.11915e-83
Ccnl2	-1.13427	9.43208	458.355	1.99977e-84	6.57928e-83
Ndufs8	-0.891156	9.74054	382.901	3.84606e-84	1.26387e-82
Cited2	-1.12592	9.43218	393.189	5.58089e-84	1.83181e-82
Dgcr6	-1.00986	9.50836	394.357	7.84108e-84	2.57066e-82
Nfib	-1.16497	9.38256	484.495	1.22803e-83	4.02134e-82
Acmsd	-1.14023	9.28158	772.338	1.83722e-83	6.00918e-82
Rps27l	-0.654383	10.5769	379.683	1.8502e-83	6.04458e-82
Aamdc	-1.10918	9.41351	462.698	3.70595e-83	1.20931e-81
Prpf38b	-1.17162	9.37331	509.879	4.99155e-83	1.62693e-81
Abat	-1.17967	9.34418	559.76	5.22489e-83	1.70101e-81
Pyurf	-1.15577	9.39185	503.948	7.1968e-83	2.34026e-81
Erdr1	-1.16245	9.43458	428.52	7.43523e-83	2.41498e-81
Mdh2	-0.899571	9.735	376.03	1.10029e-82	3.56963e-81
Abca3	-1.06478	9.49103	384.769	1.18096e-82	3.8269e-81
Top1	-1.10525	9.41824	451.064	1.33785e-82	4.33029e-81
Pts	-1.12706	9.39604	484.135	2.2756e-82	7.35708e-81
Nfic	-1.23171	9.35242	579.403	2.28391e-82	7.37542e-81
Dynll2	-0.95588	9.61905	374.516	2.30498e-82	7.43489e-81
Krit1	-1.14483	9.39766	463.933	2.68239e-82	8.6423e-81
Agpat3	-1.09964	9.47636	434.932	3.12626e-82	1.00608e-80
Pgpep1	-1.04935	9.47205	407.137	3.77759e-82	1.21429e-80
Thoc7	-0.977265	9.52771	373.417	3.94058e-82	1.26523e-80
Krt20	0.678644	9.19311	5084.71	4.04316e-82	1.29668e-80
Mlf2	-0.950216	9.57114	373.265	4.2448e-82	1.35979e-80
Slc10a2	-1.11607	9.27829	735.786	1.14156e-81	3.65273e-80
Trpm7	-1.17246	9.38517	475.705	1.52575e-81	4.87647e-80
Phldb2	-1.13897	9.41743	463.532	1.75756e-81	5.61097e-80
Osbpl3	-1.17917	9.34396	550.62	2.31612e-81	7.38574e-80
Mpc1	-0.670807	10.5433	369.113	3.22571e-81	1.02746e-79
Gm10094	0.951053	9.25343	851.692	4.63935e-81	1.47605e-79
Sdha	-0.869458	9.81617	367.736	6.31973e-81	2.0084e-79
Ndufb8	-0.653549	10.3325	367.005	9.03111e-81	2.86682e-79
Prnp	-1.15774	9.36168	503.38	1.09389e-80	3.4685e-79
Hsd17b11	-1.14941	9.3479	498.823	1.22379e-80	3.87597e-79
Sgk2	-1.20279	9.34849	565.395	1.28213e-80	4.05298e-79
Prdx3	-0.992917	9.49476	386.975	1.28257e-80	4.05298e-79
Ldhb	-0.786117	10.4647	366.27	1.29337e-80	4.0825e-79
Pkd2	-1.11018	9.42592	431.166	1.54443e-80	4.86949e-79
Stx7	-0.939226	9.56504	365.226	2.15418e-80	6.78434e-79
Lamtor1	-1.08905	9.43492	445.809	3.24653e-80	1.02131e-78
Lmo4	-1.08009	9.4453	412.505	3.88818e-80	1.22179e-78
Cckar	-1.01608	9.25909	722.876	5.86183e-80	1.8399e-78
Esrra	-1.22519	9.35584	580.061	8.64223e-80	2.70958e-78
Rogdi	-1.18798	9.36041	534.473	1.11131e-79	3.48036e-78
Ubl5	-0.723709	10.0268	361.422	1.38265e-79	4.3253e-78
Fmo5	-1.09806	9.27653	705.246	2.94933e-79	9.21599e-78
2810474O19Rik	-1.1405	9.42903	421.49	3.44191e-79	1.07432e-77
Gnpda1	-1.20794	9.3324	598.703	5.13988e-79	1.60252e-77
Slc16a2	-1.15198	9.34004	534.113	6.23541e-79	1.94193e-77
Chchd4	-1.11779	9.41892	462.118	7.02361e-79	2.18497e-77
Pink1	-1.07888	9.43339	436.033	7.05006e-79	2.19076e-77
Slc15a2	-1.13441	9.29478	661.648	7.22615e-79	2.24299e-77
Sms	-1.1414	9.3386	544.549	8.42673e-79	2.61275e-77
Acbd4	-1.15723	9.34514	540.018	8.89138e-79	2.75377e-77
Tkt	-1.10005	9.44041	421.651	1.02618e-78	3.17469e-77
Qsox1	0.866727	9.22583	1249.36	1.02783e-78	3.17628e-77
Tmem176b	-0.857939	9.94916	357.267	1.05405e-78	3.25373e-77
Tmem120a	-1.12676	9.36356	496.55	1.24122e-78	3.82729e-77
Gm10804	-1.21287	9.34942	545.455	1.57722e-78	4.85798e-77
Ndufaf4	-1.08652	9.40283	447.328	2.25955e-78	6.95195e-77
Scrn2	-1.16501	9.33304	573.662	2.31231e-78	7.10649e-77
Mrps24	-0.855812	9.71698	355.372	2.66149e-78	8.17065e-77
Wbp5	0.816664	9.50462	355.011	3.17501e-78	9.73647e-77
Smpdl3a	-0.88571	9.77379	353.523	6.57466e-78	2.01397e-76
Rhoa	-0.874117	9.71333	353.401	6.978e-78	2.13519e-76
Tmem234	-1.02375	9.47912	398.254	1.16533e-77	3.56188e-76
Tmigd1	-1.10956	9.43212	351.879	1.46904e-77	4.48531e-76
Eif1	-0.556998	10.7154	350.378	3.06187e-77	9.33836e-76
Idnk	0.845971	9.37087	438.775	5.20291e-77	1.5851e-75
Cuta	-0.999504	9.49274	393.225	5.54322e-77	1.68695e-75
Wfdc15b	-1.48411	9.96765	349.074	5.79418e-77	1.76141e-75
Sgpp1	-1.12956	9.37968	467.966	6.31511e-77	1.91768e-75
D10Jhu81e	-1.1367	9.35824	516.591	8.42878e-77	2.55676e-75
Mpp6	-1.12812	9.34348	516.012	8.77999e-77	2.66041e-75
Mkln1	-1.11974	9.38598	462.311	1.05943e-76	3.20671e-75
Tnfrsf12a	0.881628	9.29791	558.733	1.30124e-76	3.93435e-75
H2afj	-0.672844	10.3194	347.204	1.44687e-76	4.36996e-75
Cpeb3	-1.13587	9.29727	632.181	1.64521e-76	4.96365e-75
Ncoa7	-1.09369	9.38308	449.871	2.16517e-76	6.52534e-75
Ndufv2	-0.854976	9.74339	346.32	2.22935e-76	6.71153e-75
Ppargc1a	-1.1862	9.41882	413.654	2.39891e-76	7.21424e-75
Ccl4	-1.39581	9.412	345.567	3.22276e-76	9.68142e-75
Tmem126a	-1.03	9.43246	405.764	3.29415e-76	9.88528e-75
Egf	-1.53989	10.226	344.982	4.2921e-76	1.28662e-74
Vdac2	-0.881125	9.63231	344.952	4.35563e-76	1.30427e-74
Pdha1	-0.897891	9.64228	344.818	4.65018e-76	1.39098e-74
Lgals3bp	0.733298	9.38872	447.369	5.91272e-76	1.76675e-74
Pnkd	-0.898787	9.60277	343.598	8.44899e-76	2.52191e-74
BC089597	-1.18388	9.3136	600.582	8.56677e-76	2.55434e-74
Serp1	-0.888158	9.65496	343.567	8.57863e-76	2.55515e-74
Pdzd3	-1.13687	9.29425	674.6	8.71228e-76	2.5922e-74
Gm10073	-0.850018	9.74852	343.411	9.25562e-76	2.75094e-74
Rufy3	-1.14749	9.33563	534.595	1.09131e-75	3.24014e-74
Ctsh	-1.02099	9.44912	364.074	1.67895e-75	4.97958e-74
Fdx1	-0.904302	9.56147	341.853	1.98495e-75	5.88092e-74
Lamp2	-0.790223	10.1341	341.549	2.30292e-75	6.81578e-74
Mrpl4	-1.06815	9.41225	439.057	3.13938e-75	9.28155e-74
Eif4ebp3	0.71174	9.21602	1638.84	3.28726e-75	9.70851e-74
Atraid	-1.00079	9.48008	380.967	3.44714e-75	1.017e-73
Immt	-0.963701	9.50309	358.475	3.94242e-75	1.16189e-73
Paqr9	-1.13966	9.35032	485.889	7.02056e-75	2.0669e-73
Hoxb3os	-1.12131	9.32404	541.147	1.12463e-74	3.30749e-73
Mfsd1	-1.04469	9.42776	381.516	1.28569e-74	3.77719e-73
Cd63	0.546932	10.7512	335.688	4.06008e-74	1.19155e-72
Dlst	-1.0586	9.42373	416.333	5.33151e-74	1.56305e-72
Frrs1	-1.14295	9.33754	521.849	5.46583e-74	1.60076e-72
Xpr1	-1.11342	9.339	506.645	6.80702e-74	1.99146e-72
BC031181	-0.873695	9.59867	334.573	7.01174e-74	2.04921e-72
Nr2f6	-1.10738	9.38697	461.005	7.73433e-74	2.25804e-72
Tmem64	-1.11868	9.34908	489.392	9.36331e-74	2.73077e-72
Slc25a22	0.869014	9.23371	997.208	1.26486e-73	3.68506e-72
Stx16	-1.14096	9.32981	540.699	1.61223e-73	4.69224e-72
Gls	-1.007	9.45048	351.058	1.66369e-73	4.83695e-72
Ube2r2	-1.01274	9.44432	390.678	2.17232e-73	6.30919e-72
Srr	-1.10333	9.30102	608.365	2.3782e-73	6.9e-72
Pitpnc1	-1.11186	9.31956	537.913	3.07985e-73	8.92647e-72
Ywhab	-0.967049	9.47489	350.898	3.37451e-73	9.77037e-72
Baiap2l2	-1.13236	9.30553	601.735	4.61723e-73	1.33547e-71
Ggnbp1	-1.12038	9.32919	533.225	4.80667e-73	1.38883e-71
Rab18	-0.913995	9.50879	340.296	6.09981e-73	1.76064e-71
2700060E02Rik	-0.896073	9.55209	329.148	1.00011e-72	2.88374e-71
Bicc1	-1.06393	9.41798	396.553	1.12297e-72	3.23466e-71
Mrpl51	-0.852629	9.65384	328.836	1.16549e-72	3.35369e-71
Man1a	-1.04953	9.39785	394.725	1.24773e-72	3.58664e-71
Gbp7	0.690835	9.3582	631.845	1.27666e-72	3.66605e-71
Stk16	-1.07599	9.37317	455.926	1.29329e-72	3.71e-71
Pvrl3	-1.09851	9.37869	443.502	1.32105e-72	3.78575e-71
Chmp6	-1.09588	9.39147	448.261	1.32346e-72	3.78877e-71
Slc5a2	-1.13983	9.53492	328.379	1.45751e-72	4.16828e-71
Glud1	-0.897664	9.66467	327.849	1.89045e-72	5.40089e-71
Mfap3l	-1.09785	9.30393	577.097	2.66243e-72	7.59864e-71
Rap1a	-0.963302	9.46686	333.237	2.79351e-72	7.96463e-71
Golgb1	-1.10326	9.34787	486.53	3.02075e-72	8.60376e-71
Mtss1	-1.09226	9.31861	525.983	3.30081e-72	9.39187e-71
Zfp36	-1.05257	9.43247	326.689	3.33707e-72	9.48541e-71
Slc6a8	-1.07663	9.39566	417.59	3.46481e-72	9.83851e-71
Folh1	-1.10026	9.40099	402.367	3.50259e-72	9.93571e-71
mt-Nd6	-1.11178	9.32079	538.645	5.11301e-72	1.44893e-70
Ube3a	-1.03639	9.41272	401.127	6.41239e-72	1.81531e-70
Sptssa	-0.99235	9.44362	379.42	8.14543e-72	2.30359e-70
Fam13a	-1.26125	9.35136	479.044	1.36034e-71	3.84328e-70
Lyz2	-1.70724	9.72499	323.718	1.43147e-71	4.04015e-70
Psme1	0.740097	9.44016	322.338	3.17904e-71	8.96342e-70
Pkp4	-1.01043	9.4345	370.17	3.5879e-71	1.0106e-69
Neurl4	-1.10018	9.31348	552.148	3.86899e-71	1.08868e-69
Susd2	-1.08677	9.29535	578.382	3.98447e-71	1.12005e-69
Bckdha	-0.967576	9.47807	359.184	5.92143e-71	1.66287e-69
Pepd	-1.0508	9.37544	423.727	6.02335e-71	1.6898e-69
App	-0.809197	9.99486	320.4	7.28155e-71	2.04073e-69
Morn2	-1.07389	9.33178	499.644	9.11852e-71	2.553e-69
Ndufa11	-0.726077	9.96585	319.876	9.41732e-71	2.63403e-69
Nudt4	-1.132	9.74985	319.706	1.02328e-70	2.85927e-69
Evi5	-1.01615	9.41383	386.012	1.40491e-70	3.92169e-69
Hoxa7	-1.11718	9.35013	487.662	1.50163e-70	4.18751e-69
Dnajc13	-1.08737	9.31721	531.762	1.67207e-70	4.65816e-69
Slc25a13	-1.05793	9.36373	439.173	1.98715e-70	5.53043e-69
Rdh10	-1.07186	9.29328	591.542	1.99072e-70	5.53488e-69
Prdx2	-0.835701	9.6925	318.134	2.21265e-70	6.14581e-69
Eif3e	-0.931365	9.47771	321.325	2.59873e-70	7.21104e-69
Gtf2i	-1.12827	9.35107	502.175	2.77147e-70	7.68273e-69
Atp6v1f	-0.681202	10.1461	317.269	3.38168e-70	9.365e-69
Hspa9	-0.807718	9.81659	317.165	3.55852e-70	9.84499e-69
Tra2a	-1.09389	9.35742	446.19	6.2898e-70	1.73842e-68
Dennd5b	-1.12055	9.35101	460.448	6.7172e-70	1.85471e-68
Tkfc	-0.955103	9.52765	315.515	7.99245e-70	2.20466e-68
Nap1l1	-0.97339	9.44362	352.749	8.37323e-70	2.30742e-68
Ankib1	-1.07776	9.31643	522.679	9.71516e-70	2.67458e-68
Suclg2	-0.820158	9.77231	314.112	1.59104e-69	4.37584e-68
Arglu1	-1.02475	9.41537	383.99	1.70311e-69	4.67945e-68
Slc36a1	-1.07499	9.29051	611.191	1.79745e-69	4.93383e-68
Ttc14	-1.11186	9.36292	454.12	2.03205e-69	5.57232e-68
Golga4	-1.05166	9.38688	414.665	3.23599e-69	8.8651e-68
Nfkbia	-1.15015	9.51145	312.351	3.77448e-69	1.03302e-67
Clec2h	-1.08656	9.2925	602.794	4.20343e-69	1.14929e-67
Ddx17	-0.992305	9.45369	356.836	5.8724e-69	1.60405e-67
Amn	-1.07317	9.38195	406.411	7.12727e-69	1.94493e-67
Gramd1b	-1.00622	9.26806	671.141	7.14024e-69	1.94657e-67
Afap1l1	-0.964919	9.25726	749.322	9.5345e-69	2.59676e-67
Etfa	-0.804197	9.73815	310.443	9.62838e-69	2.61978e-67
Glod5	-1.06289	9.34147	462.782	1.09682e-68	2.98143e-67
Dmtn	-1.10028	9.32033	533.545	1.15437e-68	3.13482e-67
Actn4	-1.00209	9.44262	367.917	1.27856e-68	3.46872e-67
Pdzd2	-0.982906	9.26318	709.295	2.06658e-68	5.60117e-67
Tspan3	-0.902817	9.52719	311.337	2.65945e-68	7.20109e-67
Aqp11	-1.02169	9.27081	693.175	3.12756e-68	8.46042e-67
L3hypdh	-1.06738	9.28482	627.932	3.14552e-68	8.50079e-67
Ivd	-1.00911	9.39721	383.37	4.18513e-68	1.12994e-66
St8sia1	-1.0254	9.27348	655.85	7.2633e-68	1.95913e-66
Tmem189	-0.969754	9.43908	334.693	7.38745e-68	1.9907e-66
Mtch2	-0.854309	9.54671	306.043	8.34413e-68	2.24634e-66
Apbb2	-1.05323	9.28224	637.763	1.14155e-67	3.07024e-66
Tnrc6a	-1.04803	9.39593	398.571	1.28926e-67	3.46418e-66
Gm4208	-0.899863	9.24755	629.755	1.83289e-67	4.92017e-66
Enpp2	-0.938921	9.61606	304.43	1.84191e-67	4.93962e-66
Strn3	-1.03669	9.37521	414.357	2.27347e-67	6.09116e-66
Mafg	-1.05638	9.39247	391.219	2.30258e-67	6.16326e-66
Mkks	-1.00428	9.3986	387.763	2.41711e-67	6.46362e-66
Ndufs1	-1.06228	9.35771	448.765	2.45724e-67	6.56466e-66
Ddx3x	-0.863828	9.58584	303.154	3.44595e-67	9.1973e-66
Dhfr	-1.04139	9.28904	581.525	3.8625e-67	1.02993e-65
Ndufb6	-0.689652	10.0059	302.641	4.433e-67	1.18092e-65
Caprin1	-0.913431	9.48748	325.455	4.50079e-67	1.19784e-65
Map7	-1.07696	9.32182	502.241	4.65482e-67	1.23766e-65
Ninj1	-0.837499	9.60092	302.46	4.84449e-67	1.28687e-65
Pttg1ip	-0.980504	9.45612	348.844	7.01193e-67	1.86085e-65
Proc	-1.05048	9.32481	466.253	7.19868e-67	1.9086e-65
Smim20	-1.00637	9.42046	385.885	9.76678e-67	2.58704e-65
Slc25a16	-1.00806	9.38699	390.61	1.07688e-66	2.84977e-65
2020-03-06	-1.00921	9.397	378.233	1.31064e-66	3.4651e-65
Ngp	0.612292	9.34687	300.964	1.31328e-66	3.4688e-65
Psme4	-1.03167	9.36772	416.275	1.59508e-66	4.20914e-65
Rbm3	0.638589	9.79505	299.291	2.29782e-66	6.05785e-65
Tmem30a	-0.905617	9.48488	318.165	2.46446e-66	6.49105e-65
Slc25a42	-1.08666	9.30841	541.355	2.58283e-66	6.79643e-65
Ccnt2	-1.04979	9.34498	440.023	3.66641e-66	9.63871e-65
Manba	-1.06246	9.29953	556.771	4.92023e-66	1.29228e-64
Slc16a12	-1.05747	9.33933	440.898	8.367e-66	2.1955e-64
Kcnj1	-1.13593	9.43718	296.481	9.13378e-66	2.39445e-64
Sypl2	-0.995251	9.27	648.75	1.17397e-65	3.07471e-64
Rps18-ps3	0.841356	9.22809	926.553	1.54771e-65	4.0498e-64
Polr2m	-0.97781	9.42541	361.247	1.56043e-65	4.07927e-64
Galnt14	-0.995052	9.26947	660.058	1.64111e-65	4.28618e-64
Mthfd1	-1.07125	9.31449	519.579	1.91207e-65	4.98919e-64
Gnai2	-0.986332	9.4349	312.537	2.45496e-65	6.39982e-64
Herpud1	-0.877819	9.64457	294.461	2.46498e-65	6.41994e-64
Mff	-0.970114	9.42068	363.112	2.65278e-65	6.90265e-64
Ndufv1	-0.855021	9.54035	293.903	4.38959e-65	1.14113e-63
Hnrnpa2b1	-0.738591	9.85895	292.875	5.37197e-65	1.39522e-63
Idh3a	-1.00713	9.39511	382.827	6.08393e-65	1.57866e-63
Chac2	-1.02768	9.31959	468.146	6.10319e-65	1.5822e-63
Wasl	-0.955575	9.42543	343.965	6.28628e-65	1.62815e-63
Hmgcs2	0.431744	9.55575	334.269	6.41051e-65	1.65879e-63
Mtdh	-1.03213	9.37137	408.277	7.6496e-65	1.9776e-63
Gm15217	-1.03155	9.29557	513.518	8.01142e-65	2.06922e-63
Ccdc141	-1.12195	9.33183	467.391	9.1592e-65	2.3635e-63
Mettl7b	-1.03235	9.40165	365.066	1.07753e-64	2.77796e-63
Hsd11b2	-1.35942	9.48621	291.238	1.20088e-64	3.09313e-63
Pxmp4	-0.938574	9.46487	315.408	2.65789e-64	6.83968e-63
Serbp1	-0.839282	9.59184	289.22	3.23877e-64	8.32683e-63
Paics	-0.945746	9.42012	346.784	4.36648e-64	1.12158e-62
Slc25a25	-1.07455	9.3506	413.333	5.65093e-64	1.45018e-62
Tet2	-1.04486	9.31523	474.011	7.59924e-64	1.94838e-62
Eif5a	-0.710078	9.91248	287.348	8.12811e-64	2.08207e-62
Slc33a1	-1.01305	9.37139	383.823	8.70841e-64	2.22868e-62
BC004004	-0.915358	9.49665	327.689	1.15806e-63	2.96104e-62
Phyh	-0.805996	9.64285	286.121	1.48603e-63	3.79615e-62
Nme1	-0.711152	9.91508	286.111	1.49336e-63	3.81141e-62
Ift20	-0.958502	9.41867	358.364	1.51212e-63	3.85576e-62
Stard7	-1.01197	9.36263	411.246	1.76256e-63	4.49027e-62
Npnt	-1.0354	9.36258	337.044	2.0196e-63	5.14044e-62
Snap23	-0.988318	9.35819	395.589	4.26166e-63	1.08372e-61
Rab1a	-0.769166	9.70932	283.366	5.76086e-63	1.46363e-61
Cltb	-0.845473	9.51234	288.91	7.25117e-63	1.8406e-61
Gm5617	-0.916625	9.43518	322.183	8.20071e-63	2.07974e-61
Srrm2	-0.851646	9.59854	282.553	8.59271e-63	2.17718e-61
Eif3i	-0.963536	9.41396	354.139	1.36251e-62	3.44913e-61
Abhd14a	-1.01554	9.28905	562.528	1.41051e-62	3.56743e-61
Svip	-1.01159	9.3243	452.098	1.46414e-62	3.69972e-61
Nr2f2	-1.02809	9.40338	364.55	1.53569e-62	3.87703e-61
St6galnac2	-1.02038	9.33813	430.717	1.54829e-62	3.90533e-61
Mrpl20	-0.776846	9.63943	281.055	1.79481e-62	4.52306e-61
Sap30	-0.962868	9.39416	345.273	1.95299e-62	4.91726e-61
Brk1	-0.902138	9.47839	316.997	2.64748e-62	6.65986e-61
Fis1	-0.738751	9.74423	280.24	2.68075e-62	6.73748e-61
Nadk	-1.0065	9.35431	399.293	3.42155e-62	8.59163e-61
Smap1	-0.964258	9.37679	372.375	3.852e-62	9.66381e-61
Nabp1	-0.979941	9.38535	346.388	3.91195e-62	9.80543e-61
Chdh	-1.01554	9.3374	427.525	4.216e-62	1.05581e-60
Use1	-0.929042	9.44674	329.736	5.70853e-62	1.42831e-60
Retsat	-1.06215	9.37459	377.315	5.8752e-62	1.46869e-60
Saa3	0.384247	9.73328	278.216	7.25428e-62	1.81182e-60
Calm3	-0.742451	9.76345	278.177	7.3954e-62	1.84542e-60
Dusp11	-0.989702	9.38668	372.311	7.40731e-62	1.84675e-60
D630023F18Rik	-0.982165	9.27314	558.215	7.56827e-62	1.8852e-60
Vkorc1	-1.01578	9.34251	428.968	8.54884e-62	2.12756e-60
Apoe	-1.06875	9.50751	277.857	8.65443e-62	2.15193e-60
Gm5424	-1.01904	9.37594	370.276	1.02854e-61	2.55521e-60
Sigirr	-1.05484	9.3133	498.134	1.4922e-61	3.70297e-60
Pdap1	-0.964591	9.37916	365.913	1.4932e-61	3.70297e-60
Akap9	-1.00827	9.34818	405.024	1.50201e-61	3.72154e-60
Lima1	-1.02757	9.32308	436.116	1.61922e-61	4.0084e-60
Ccni	-0.829615	9.52401	276.377	1.79359e-61	4.43613e-60
Acaa1a	-0.896588	9.45722	309.389	2.01577e-61	4.98124e-60
Armc1	-1.00826	9.3406	423.44	2.08877e-61	5.1571e-60
Atp6v1b2	-0.840991	9.56095	276.057	2.09942e-61	5.17881e-60
Tcf25	-0.938516	9.44088	336.215	2.17937e-61	5.3713e-60
Acads	-0.914632	9.4346	323.284	2.3185e-61	5.70919e-60
Fgfr1op2	-0.96518	9.38368	367.787	2.34534e-61	5.7702e-60
Gipc2	-0.861431	9.48046	284.649	2.88284e-61	7.08636e-60
1500011K16Rik	-0.853217	9.48467	287.709	2.90135e-61	7.12561e-60
RP24-362L9.2	-0.883227	9.24921	717.684	2.91872e-61	7.162e-60
Angptl7	0.659309	9.20219	1837.28	3.05476e-61	7.48925e-60
Gm10146	0.702822	9.20215	1900.69	3.14919e-61	7.71401e-60
Dhrs1	-0.98425	9.35359	393.936	3.6634e-61	8.96572e-60
Acy1	-0.965477	9.26715	624.09	4.22894e-61	1.03408e-59
Cyp2a4	-0.953146	9.26698	524.225	6.08365e-61	1.4863e-59
Slc12a7	-1.02325	9.3009	508.221	6.47066e-61	1.57947e-59
Cobll1	-0.986148	9.36925	377.7	6.59879e-61	1.60935e-59
Eif3k	-0.78045	9.6544	273.435	7.62698e-61	1.85849e-59
1810022K09Rik	-0.973465	9.37535	372.356	8.21814e-61	2.00079e-59
Atxn1	-1.0103	9.30541	463.096	8.95679e-61	2.17873e-59
Slc13a1	-0.900026	9.89466	272.787	1.04968e-60	2.55111e-59
Fahd2a	-0.990745	9.3491	405.859	1.08047e-60	2.62367e-59
Ethe1	-0.84078	9.59597	272.48	1.22076e-60	2.96177e-59
Acot2	0.734485	9.36308	327.561	1.41772e-60	3.43666e-59
Klf15	-1.10573	9.30458	525.141	1.66665e-60	4.03658e-59
BC025446	-0.975356	9.2816	536.286	1.75294e-60	4.24191e-59
2610001J05Rik	-0.869768	9.47602	304.106	1.93969e-60	4.68976e-59
Mtfr1l	-0.977008	9.36729	388.367	1.98611e-60	4.79784e-59
Slc22a22	-0.920839	9.25771	657.659	2.17497e-60	5.24955e-59
Mpv17	-0.997589	9.32018	444.288	2.67673e-60	6.45504e-59
Ppt2	-1.02641	9.32781	441.254	2.7531e-60	6.63349e-59
Fam96a	-0.859501	9.46106	288.101	2.86144e-60	6.88861e-59
Lyrm5	-0.97987	9.33835	407.398	3.57282e-60	8.5938e-59
Rbm26	-0.998592	9.30006	485.344	3.6685e-60	8.81638e-59
Gatsl2	-1.03215	9.29091	531.946	4.96217e-60	1.19152e-58
Hbb-bs	-1.94341	9.65636	269.453	5.41746e-60	1.29973e-58
Galnt1	-0.973798	9.35296	378.533	6.64823e-60	1.59364e-58
Rnf10	-0.979034	9.37844	377.155	6.90505e-60	1.65379e-58
Sptbn1	-0.842339	9.53327	268.701	7.84333e-60	1.8769e-58
Apeh	-1.00112	9.32431	437.255	8.38776e-60	2.00547e-58
Erlin1	-1.02393	9.29476	521.586	1.0037e-59	2.39774e-58
Wdfy3	-1.00888	9.34548	402.663	1.01029e-59	2.41144e-58
Gm8797	0.81298	9.26794	549.768	1.02461e-59	2.44353e-58
Fam133b	-0.986472	9.33891	400.252	1.05644e-59	2.5173e-58
Gldc	-1.00622	9.3651	344.205	1.19885e-59	2.8542e-58
2020-03-02	-0.801137	9.59119	267.546	1.38514e-59	3.29492e-58
Fth1	-0.439102	14.2075	267.079	1.74408e-59	4.14522e-58
Ankrd11	-0.989178	9.29279	500.279	2.52131e-59	5.98743e-58
Galm	-0.980082	9.29244	499.2	2.69905e-59	6.40406e-58
Epb41l5	-1.01396	9.31669	454.81	3.41897e-59	8.10537e-58
Dbt	-0.97785	9.30214	465.383	3.58417e-59	8.48982e-58
P3h2	-1.02178	9.33384	413.612	3.59014e-59	8.49676e-58
Syne4	-0.989385	9.30817	458.721	3.59678e-59	8.50528e-58
Ube2d3	-0.640473	9.96708	265.292	4.20367e-59	9.93201e-58
Tmem245	-1.01573	9.31168	459.619	4.88992e-59	1.15437e-57
Enpep	-0.984337	9.29041	493.934	5.33218e-59	1.25771e-57
D630045J12Rik	-0.983931	9.29185	500.11	5.83035e-59	1.37406e-57
[truncated: 9,389 more rows]

## Sheet: 27hr_pseudobulk
	logFC	logCPM	F	PValue	FDR
[truncated: 10,752 more rows]

[truncated: 3 more sheets: 36hr_pseudobulk, 48hr_pseudobulk, LPStimePointsAsBulkCounts]
