# Supplementary material for: The orchestrated cellular and molecular responses of the kidney to endotoxin define a precise sepsis timeline
Source: eLife. 2021 Jan 15;10:e62270. doi: 10.7554/eLife.62270 (PMC7810465; doi:10.7554/eLife.62270)
Supplement: Supplementary file 5. [file elife-62270-supp5.xlsx]

## Sheet: Clinical demographics
Subject	Sequencing number	Age	Gender	Race	Baseline Creatinine (mg/dl)	Peak Creatinine (mg/dl)	Time from diagnosis to Biopsy (day)	Primary pathologic diagnosis	SOFA Score*	qSOFA score	Source of Infection	Organism**	Other risk factors and comorbidities
Subject 1	ATR24	22	M	White	1	5.72	1	ATN and AIN	8	2	Dental	unconfirmed	Fevers, hypotension, dental pain with NSAID use prior to admission, emesis, hallucinations, thrombocytopenia, vancomycin, piperacillan-tazobactam exposure
Subject 2	ATR22	53	F	White	0.7	5.1	6	ATN	4	1	Empyema	unconfirmed	Fevers, hypotension, sepsis from empyema, breast cancer on taxol therapy, vancomycin, piperacillan-tazobactam exposure
Subject 3	ATR15	29	F	White	1	6.6	20	ATN	13	1	Ischemic colitis	Clostridium Difficile	Recent pregnancy with fetal demise, sepsis, fevers, hypotension on vasopressors, ischemic colitis, multi-organ system failure, thrombocytopenia, hyperbilirubinemia, clostridium difficile diarrhea, Herpes Simplex virus conjunctivitis on acyclovir, antibiotic exposure included vancomycin, doxycycline, cefepime, piperacillin-tazobactam, ciprofloxacin, and metronidazole.
Subject 4	ATR25	55	M	White / Hispanic	0.8	3.2	7	ATN	21	3	Peritonitis, bacteremia, pneumonia	Pseudomonas Auruginosa in blood and sputum, Escherichia Coli in peritoneal fluid	Sepsis secondary to peritonitis, fevers, hypotension on vasopressors, in liver transplant recipient on tacrolimus, history of hepatitis D, emesis, clostridium difficile diarrhea status post bowel transplant and sub-total colectomy,on acyclovir, meropenem, vancomycin , pancytopenia, respiratory failure on mechanical ventilation
Subject 5	H17	36	M	White	1.7	4.2	2	ATN	14	2	Colitis	Escherichia coli	Sepsis with hypotension on vasopressors and fevers due to Escherichia coli colitis with bloody diarhea, ADAMSTS13 activity normal, E. Coli 0157:H7 shiga-like toxin normal, biopsy not consistant with hemolytic uremic syndrome, acute liver failure, hepain induced thrombocytopenia, hyperbilirubinemia. History of obesity with sleep apnea and right heart failure.
Subject 6	ATR5	46	M	White	0.8	5.3	8	ATN	11	3	Necrotizing Pneumonia	Methicillin-resistant staphylococcus aureus	Necrotizing pneumonia, febrile, hypertensive emergency on nicardipine infusion, acute respiratory distress syndrome on mechanical ventiation with FiO2 of 100%, diabetes, NSAID use prior to admission, tobramycin, vancomycin, and piperacillin-tazobactam exposure, thrombocytopenia, HIV with CD4 count of 229, and tenofovir exposure.
Subject 7	H1	74	M	White	1.2	7.44	3	ATN	9	2	Post-obsturctive pneumonia	unconfirmed	Sepsis, post-obsturctive pneumonia with hypotension and fevers, gout and acute hyperuricemia, metastatic lung cancer on cisplatin and recent nivolumab, vancomycin and piperacilli-tazobactam exposure
Subject 8	H8	80	M	White	0.9	7.7	7	ATN	5	1	unconfirmed	unconfirmed	Fevers and hypotension after fall and hip fracture, history of heart failure, mechanical aortic valve, seizure disorder, received broad spectrum antibiotics.
Subject 9	ATR2	33	M	White	0.9	7.1	15	ATN and AIN	6	1	Urosepsis, bacteremia	Providencia Rettgeri in urine, Klebsiella pneumonia in blood	Urosepsis and bacteremia in subject with suprapubic catheter, relative hypotension with history of hypertension, seizure disorder, heroin abuse, thrombocytopenia, exposure to ciprofloxacin and linezolid
Subject 10	ATR14	58	M	White	0.9	5.7	8	ATN	11	3	Fever of unknown origin	unconfirmed	Fever of unknown origin in setting of prior stem cell transplant, hypotension, volume depletion, hemtochezia, acute respiratory distress syndrome requiring mechanical ventilation, ventricular tachycardia cardiac arrest from torsades de pointes and long QT, vancomycin and piperacillin-tazobactam exposure.
Subject 11	ATR18	33	M	Black	1.6	9.6	5	ATN	7	1	Pneumonia and bacteremia	Methicillin-resistant staphylococcus aureus	Sepsis due to staphylococcus aureus pneumonia and bacteremia, rhabdomyolysis, history of hypertension, loop diuretic and toradol use while hospitalized.
Subject 12	H10	70	M	White	1.1	4.06	10	ATN	8	2	Pneumonia and colitis	Viral pneumonia, clostridium difficile colitis.	Sepsis due to viral pneumonia, acute respiratory distress syndrome on mechanical ventilation, encephalopathy, exposure to vancomycin and zosyn. History of tobacco use, obesity, hypertension, diabetes mellitus, sleep apnea.
Subject 13	H7	26	F	White	0.97	9	5	ATN	10	2	Chorioamnionitis and secondary hospital acquired pneumonia	unconfirmed	Sepsis from chorioamnionitis after a cesarean section, severe hypotension, fevers, secondary hospital acquired bilateral pneumonia, broad spectrum antibiotics,
Subject 14	ATR6	51	F	White	0.76	6.76	5	ATN and AIN	6	1	unconfirmed, treated for urosepsis	unconfirmed	Febrile illness with encephalopathy and shortness of breath, herpes simplex virus positive, on supplemental oxygen, treated for urosepsis as had urinalysis consistent with infection, history of hypertension on losartan
Subject 15	H5	41	F	Black	0.7	2.36	18	ATN	7	1	Pneumonia	unconfirmed	Sepsis due to pneumonia on vancomycin and cefepime, developed fevers and hypotension with rhabdomyolysis after Endoscopic Retrograde Cholangiopancreatography. Has a history of primary sclerosing cholangitis with cirrhosis, History of diabetes mellitus, nephrolithiasis, cholelithiasis, pancreatitis, and serum protein electropheresis with M protein spike
Subject 16	H4	55	F	Black	0.69	0.92	5	ATN	11	2	Urosepsis	Proteus Mirabilis	Urosepsis and Cellulitis with possible toxic epidermal necrolysis with hypotension, hypoxia, hypothermia, on vancomycin, altered mental status, history of discoid lupus, no signs of lupus nephritis on biopsy. History of morbid obesity, gastro-esophageal reflux disease, pulmonary hypertension with obstructive sleep apnea.
Subject 17	AIR2	65	M	White	0.96	9.77	8	ATN and AIN	9	2	Lobar Pneumonia	unconfirmed	Sepsis due to lobar pneumonia, hypotension, and septic shock. Fevers, nausea, vomiting, and diarrhea accompanied. Hyponatremia and thrombocytopenia. History of treated multiple myeloma. History of irritable bowel syndrome, osteoarthritis. Levofloxacin and ceftriaxone exposure.
Subject 18	H20	43	F	White	1.02	7.35	2	ATN	4	0	Abscess	Methicillin-resistant staphylococcus aureus	Febrile illness with staphylococcal abcess in forearm, treated with bactrim, NSAID exposure prior to admission. History of hypertension on an ACE-inhibitor.
Subject 19	AIR8	55	F	White	0.7	1.6	3	ATN and AIN	3	2	Urosepsis	Escherichia Coli	Sepsis with hypotension and fevers from refractory cystitis, iodinated contrast administration, gentamicin use, history of diabetes, hypertension, and nephrolithiasis
Subject 20	ATR7	42	M	White	1.33	8.7	2	ATN and AIN	5	1	Multilobar Pneumonia	unconfirmed	Sepsis due to diffuse multilobar pneumonia, on vancomycin and piperacillan-tazobactam, history of hypertension on losartan
Subject 21	ATR33	60	M	White	1	3.3	6	ATN and AIN	3	1	unconfirmed	unconfirmed	Clinical sepsis of unclear etiology with fevers and hypotension, received vancomycin and zosyn
Subject 22	ATR28	67	F	White	1.02	8	7	ATN and AIN	4	0	urinary tract	unconfirmed	Febrile with urinary tract infection and relative hypotension, treated with cipro
*SOFA score calculated from most severe clinical or biochemical value within time from diagnosis to biopsy window or up to 7 days after kidney biopsy based on all available data. Subjects from outside health systems may have had partial or incomplete clinical datasets (e.g. missing bilirubin value or platelet count).
**All subjects carried a clinical diagnosis of sepsis in their health record. Subjects who were biopsied in outside health records may have lacked microbiologic test information.

## Sheet: Sheet1
Subject number	Subject 1	Subject 2	Subject 3	Subject 4	Subject 5	Subject 6	Subject 7	Subject 8	Subject 9	Subject 10	Subject 11	Subject 12	Subject 13	Subject 14	Subject 15	Subject 16	Subject 17	Subject 18	Subject 19	Subject 20	Subject 21	Subject 22
SCAMP5	0.0324084	0.00570281	0.0960988	0.00811201	0.0309671	0.0143551	0.0274711	0.0508226	0.0014184	0.00320392	0.0119792	0.0844596	0.00334367	0.0224045	0.0187125	0.0208881	0.0264261	0.0267265	0.0173087	0.0299596	0.105202	0.0308899
SNORD3C	185.836	65.3271	247.792	45.0208	12.6548	11.1074	60.8901	178.048	1.16353	3.85997	12.9701	144.797	9.48342	21.3437	24.2005	86.1196	167.408	189.362	31.2858	71.5413	25.7408	92.2663
SCARNA22	503.379	204.347	566.602	144.13	7.04133	24.9379	132.136	161.946	1.28668	3.87576	9.94169	194.198	28.2294	74.5217	32.4164	40.6433	287.127	84.5364	141.865	217.495	28.4721	320.05
MIR4449	403.231	211.443	551.839	105.993	5.57443	8.11169	503.721	427.699	1.94026	1.05554	8.41019	1163.52	66.582	54.8847	204.236	1571.89	218.115	538.177	153.755	138.762	75.769	257.51
PTMS	9.23739	21.702	15.8538	14.4279	2.34864	5.51649	5.51649	14.4279	0.401336	5.42729	2.14869	11.0407	6.36944	9.00769	8.28013	9.82256	14.4279	8.80651	33.2939	25.0653	33.2939	19.808
RNU5E-1	685.583	215.462	454.073	141.96	5.61622	9.74464	296.292	361.113	1.41452	0.565958	0.697541	653.538	52.9384	96.6106	143.511	753.335	195.347	524.629	77.4286	211.619	189.233	283.75
SNORD3A	60.8909	23.4118	60.8909	23.4118	5.06921	10.5052	23.4118	32.7754	0.374796	2.3015	9.0034	42.7683	15.2606	17.6255	23.4118	137.67	32.7754	137.67	17.6255	23.4118	17.6255	23.4118
SNORD3D	75.0129	46.3823	108.969	34.2319	3.65579	8.19253	49.3205	99.4588	0.458208	1.88782	0.945489	87.5965	13.2224	38.7473	16.6891	57.1195	108.969	125.856	37.4532	75.0129	42.3647	79.604
SNORA71D	180.62	68.7017	339.636	49.2186	4.9237	13.7159	184.746	339.636	0.563428	1.26336	1.08781	306.404	25.1432	30.0514	39.0292	85.3809	77.9854	32.4255	41.8563	95.2916	16.8506	130.636
SNORA9	37.0862	129.102	356.18	85.5995	5.57343	24.1047	132.981	185.834	0.753043	2.39057	3.29604	167.329	11.2381	77.3425	21.6392	36.6974	157.394	7.3497	89.466	167.329	0.120487	361.741
SCARNA8	1045.36	58.6899	837.33	89.8285	3.98564	14.0328	202.416	298.978	1.99941	1.40064	1.5721	411.225	12.1811	51.7078	36.8916	95.4021	92.5296	70.9792	117.704	194.705	1.31096	269.475
NR4A1	0.0700616	0.338647	0.158698	0.31062	0.0322665	0.0284389	0.145377	0	0.259325	0.213395	0.118777	0.0799528	0.143265	0.0237746	0.263702	0.0271905	0.0518294	0.137668	0.043557	0.197042	0.0718176	0.240325
RNU11	704.18	71.1938	296.965	46.5652	1.84456	4.50906	106.064	259.514	1.48342	1.43569	0.586563	359.706	8.01164	22.2301	163.044	490.112	146.386	556.483	89.0501	109.086	232.621	103.201
RNU6-36P	801.45	12.5308	1296.93	44.2203	4.36547	10.4552	247.909	358.786	1.99329	1.29042	0.219646	731.389	5.54606	50.8975	74.6083	358.6	260.297	248.908	101.032	103.365	257.25	341.11
SNORA61	127.383	44.2681	173.869	63.5104	4.53347	6.57665	137.088	210.234	0.387174	1.70152	0.714623	191.052	14.2782	13.3018	39.8683	24.5933	44.7821	38.8234	24.0607	64.6194	25.7065	80.9681
KCNK6	15.9431	40.6995	69.9725	39.5945	1.74497	3.60851	12.0895	21.1212	0.587703	4.30183	1.75663	37.1275	8.73973	34.1064	8.04533	3.32211	73.6108	20.1445	113.667	31.4668	126.808	71.5298
PTCH2	197.004	67.6167	153.309	43.4251	1.16463	3.09566	69.5794	119.644	1.41922	1.51114	0.526693	140.03	9.4917	9.25956	14.0306	63.106	43.5622	263.119	30.5226	39.1471	41.1233	82.8924
SNORA38B	58.7336	187.149	616.334	55.0558	2.62377	4.29423	188.227	913.833	1.18078	1.19294	0.493151	640.504	10.1565	42.4874	60.1731	201.509	198.073	491.505	90.1841	198.985	3.0874	280.683
SNORA71C	41.2976	32.7738	243.327	20.3452	7.86905	12.9405	296.777	251.188	2.02381	4.24405	6.9881	336.435	21.5476	34.1875	43.881	19.0923	74.997	21.2054	45.1012	95.4643	0.392857	155.22
PLEKHN1	51.178	101.112	151.59	125.347	2.17609	8.99867	9.17846	59.07	0.688517	5.7412	0.793726	33.9518	11.6302	24.1381	11.3945	23.4376	32.4988	62.6324	52.892	161.072	41.1099	82.7286
SCARNA20	97.9477	113.139	380.06	126.792	3.83667	6.79914	135.375	229.672	0	0.958144	1.61533	391.369	6.80323	34.1595	41.1388	34.4399	203.233	39.6197	107.234	141.476	9.39513	246.351
GPX3	0.000897565	0.039233	0.0303015	0.0282232	1.25394	0.0532564	0.136629	0.17779	0.0122792	0.0339219	0.0539444	0.181563	0.0277895	0.0473445	0.0194597	0.181563	0.0884554	0.0771536	0.0064445	0.046748	0.115136	0.00278806
RNVU1-7	11.5993	26.7122	295.082	122.654	5.7677	5.1325	127.242	85.1413	0.96417	0.858122	3.74522	129.653	6.41698	23.4874	8.57905	30.3438	109.886	59.7753	45.9501	34.7101	67.8728	87.3315
SNORD22	81.2264	29.077	51.6169	18.7457	2.94655	3.1612	31.2248	56.3308	0.601828	0.839349	1.57184	56.3308	5.34102	16.9206	9.73303	39.493	38.0902	31.5874	18.3583	35.3856	18.8055	39.2643
RNU5A-1	237.139	50.3578	126.204	53.7218	1.84815	2.19246	61.4924	128.989	0.344072	0.85006	0.474688	177.552	6.42511	12.0969	18.8821	104.332	45.8809	85.6436	36.3573	50.8871	76.8895	85.6436
ALDOB	0.00772217	0.0628149	0.0105466	0.00797198	0.918663	0.00153896	0.0403796	0.0725993	0.00202582	0.000113052	0.000434885	0.184709	0.000855182	0.0181849	0.00696454	0.166479	0.0584095	0.0343468	0.00190456	0.0419267	0.142565	0.0021261
AEBP2	7.1588	16.4907	24.32	35.3586	1.68265	3.15383	7.09966	8.89681	0.847321	3.5696	1.74148	11.353	2.59319	7.3983	8.7048	1.31871	25.5099	3.31368	16.7696	19.9081	37.9816	28.1144
SNORD66	4.58091	30.4687	127.775	18.9696	4.51156	9.43151	245.499	328.139	1.47046	1.3857	0.105308	416.051	9.45334	37.1969	38.6622	59.3656	62.9692	43.5051	64.021	63.2093	8.38485	76.884
SNORA16A	10.6013	35.281	68.8532	7.56827	1.91377	6.78126	55.6138	106.818	0.458227	1.26749	2.25572	104.985	4.99443	22.1773	11.5074	20.3319	26.4036	30.7204	38.367	37.5527	0.312798	55.6138
RNVU1-19	30.227	5.10018	47.6403	1.20574	1.82476	1.77632	202.29	265.81	3.08164	2.22039	1.814	414.226	6.65311	14.6627	26.0957	318.168	32.3612	591.244	91.9728	48.5688	162.344	110.153
SNORA65	11.1384	66.4123	87.7755	79.6488	9.27235	6.00059	433.641	306.652	0.794221	1.15092	3.64252	180.364	22.0379	8.89457	32.5613	21.6988	7.58727	3.26123	15.5453	91.3424	5.85826	132.786
MTRNR2L8	16.4764	31.8494	134.273	19.8791	6.19873	8.29968	69.7232	50.5633	6.20778	0.789368	0.88219	46.587	3.8842	25.5118	7.216	20.1145	61.0485	22.1257	18.5252	66.8608	61.173	60.9036
LINC00999	183.641	89.4329	85.6474	44.8985	0.503912	0.636377	10.1881	46.6512	0.772679	1.82654	0.682187	43.9942	0.581992	2.52114	42.0853	40.3572	123.685	206.937	7.60742	23.6974	206.937	43.1387
SNORA68	6.02127	43.2943	84.4688	17.1515	3.17019	4.77543	44.4498	61.9167	0.65231	1.33015	1.61936	64.8219	4.48085	14.4183	8.81425	4.14798	25.5026	14.2138	35.8465	58.0479	24.0088	64.2106
SCARNA11	66.743	3.1119	203.019	42.3916	8.11041	5.66654	340.288	518.603	1.73555	1.51063	2.55464	635.465	17.9362	9.50019	46.9504	116.55	16.2309	70.2175	5.40134	82.3629	1.13801	191.961
VTRNA1-1	998.532	21.858	556.616	69.9522	7.66821	2.60494	102.84	547.747	0.79784	1.19444	2.24074	641.562	15.8071	27.9707	125.296	390.6	128.394	64.5139	13.6528	77.8318	3.47994	254.258
RNU4-1	99.5033	27.7115	64.3181	29.1534	2.99297	5.77577	29.1534	29.5794	0.340016	1.11948	6.61056	19.1007	8.16063	7.64246	6.88395	35.4046	21.06	13.1034	9.32658	49.3426	3.86387	69.0895
SNORA55	28.3558	38.1474	59.6529	32.5337	3.03156	5.46867	85.6175	154.412	0.52378	0.78486	0.78486	104.095	10.1902	10.9689	22.7798	17.7529	13.8033	3.33282	19.2442	51.7722	8.06896	53.2391
SNORA80B	19.7482	32.0322	197.087	48.6563	3.29504	6.81893	171.59	220.693	0	0.454963	2.4375	238.114	14.7325	13.1636	23.1259	57.8024	29.8621	42.5983	36.2592	107.774	1.96048	125.95
SNORA71A	108.572	14.1651	185.853	32.758	4.02773	7.73842	82.2096	113.776	0.984543	2.08372	6.34609	157.972	9.98395	12.1459	11.3631	20.996	19.1511	1.33681	16.9414	48.2993	1.06156	45.1194
ANK3	0.115304	0.237824	0.150302	0.140359	0.977041	0.504763	0.370545	0.140244	0.379866	0.236524	0.345195	0.26554	0.352363	0.26018	0.0371562	0.151427	0.206689	0.502731	0.289174	0.281121	0.195593	0.040303
SNORD26	23.2634	16.2512	34.4038	14.352	3.07234	4.9965	38.7234	61.623	0.284903	1.0077	1.26564	36.2107	7.63005	12.4873	10.7751	17.6614	16.7249	8.06704	9.87905	16.7888	3.65628	28.9918
RNVU1-8	79.3477	1.06398	28.4645	3.68011	6.42142	2.69124	146.015	254.266	9.48818	0.413074	0	798.096	20.0654	14.5452	273.555	683.537	47.2907	433.765	97.1975	21.0292	2170.59	250.873
SNORD68	16.5363	8.06817	46.8611	11.9432	1.54643	1.76961	46.4733	85.6905	0.51471	0.628811	0.527875	97.217	2.165	10.895	12.2538	52.552	25.5813	24.7046	14.7972	23.2299	19.3744	30.8349
RNA28S5	4.0817	8.76635	11.4391	8.76635	1.24641	4.71426	8.76635	11.4391	0.249753	1.42932	0.675495	8.76635	6.26189	11.4391	16.2863	8.76635	20.6842	6.26189	36.8223	20.6842	36.8223	11.4391
C19orf68	6.72492	9.54803	8.07068	16.2239	2.12939	3.36072	4.41081	7.26396	3.28737	5.42309	1.49023	6.20386	3.09549	3.7036	9.7023	1.67229	8.83142	4.75491	11.8764	14.4407	5.54998	16.8541
HOXA6	3.66288	25.8268	62.6248	61.5552	3.00062	4.33754	10.3809	8.23481	2.39665	6.32183	3.46507	21.7968	2.13249	3.86813	10.4194	7.92228	6.71558	4.41815	18.2394	59.3291	0.13704	71.6186
SNORD89	1.51618	12.4602	17.9878	23.5544	2.14975	2.64594	21.8448	13.8033	0.445233	1.15322	2.69144	8.54901	2.41231	15.7985	3.63223	7.22019	20.8248	4.70065	7.62558	25.011	10.4983	18.8213
RNU5B-1	199.546	40.8239	111.961	43.2121	1.53995	2.22295	58.327	76.4635	0.233298	0.343327	0.201796	110.259	4.63697	4.55319	17.0499	67.019	27.0904	16.4427	9.9026	34.4411	14.3179	76.4635
LINC01000	18.6595	13.3753	22.3198	31.5122	1.51066	1.22414	6.84248	16.8338	0.379008	1.86391	1.23794	8.93914	2.0095	3.77446	11.9109	10.7676	19.6577	16.8338	4.13925	8.24757	24.454	18.6595
SNORD13	20.6785	23.3319	102.666	2.44352	6.05697	2.34927	103.521	142.179	1.30878	0.37699	1.81521	214.136	15.5383	19.9214	18.2306	32.8094	52.2753	29.2268	21.4714	30.4733	0	55.4118
ANP32B	1.26155	22.3415	7.79235	3.10393	2.50631	5.86452	2.83127	4.74026	1.10659	4.66202	2.17391	7.54094	5.16894	4.20791	1.65367	2.61553	5.32435	4.26351	24.7645	11.5403	10.0479	12.3827
PELP1	5.56403	22.2045	11.4007	10.7072	1.63233	2.19819	3.77001	7.41129	1.41486	2.13837	0.936984	9.89157	1.95709	2.81621	1.76665	6.34419	4.91574	3.97694	19.4042	13.9208	9.70325	15.9637
FBXW4P1	3.40977	30.5011	25.5657	92.8661	1.14096	3.68539	11.5571	5.13833	0.348755	3.34256	1.62922	20.5465	2.13354	7.47985	10.0217	9.73809	12.786	9.0706	17.0214	33.4509	15.56	63.9905
SNORD59B	7.45963	1.26522	39.116	6.68356	6.21793	4.33185	159.502	195.328	0.853671	1.02299	0.837209	214.199	7.26914	27.8231	28.2911	31.687	62.365	4.36478	53.0358	66.457	1.67207	124.196
UBE2M	1.49452	10.2098	2.66795	17.6606	0.90982	2.3643	8.37068	17.7317	2.92015	2.10841	1.1165	4.28639	4.17734	4.51968	6.8142	0.9153	8.00261	1.27542	9.67842	10.9196	14.3839	8.09018
MEIS2	6.31453	15.1028	25.8656	12.912	1.21441	0.846054	2.18488	7.8092	0.272452	2.62662	2.55542	5.89804	1.70664	4.41572	4.85446	1.74033	15.5219	4.17397	14.2012	18.7744	16.7406	20.1964
SNORA25	23.933	6.11556	108.762	4.37419	4.85593	3.30515	89.4627	90.6448	1.04202	1.48474	2.46323	80.079	5.45423	6.78739	8.69935	30.1526	9.995	7.18709	3.04402	17.043	1.66783	38.9775
SCARNA17	0.312838	9.01856	8.84767	15.4177	5.48075	3.78665	11.232	7.69922	2.67552	7.47373	4.75457	7.66157	2.71397	14.9163	7.57164	0.745676	7.74007	7.05718	5.51634	12.5344	2.31299	15.8214
PODXL	0.104922	0.153346	0.152256	0.106878	0.140996	0.0841895	0.414551	0.579502	0.167682	2.06422	0.273604	0.148834	0.640082	0.0753647	0.0471158	0.245434	0.44151	0.0776057	0.126654	0.194278	0.181201	0.0219862
SNORA45B	12.1163	5.2864	27.0591	106.662	7.46558	2.25088	74.7558	55.0134	0.228219	1.01285	1.29105	76.1781	14.1708	29.9931	9.08432	58.1549	8.68544	0.241851	10.8444	33.7466	0.686676	55.495
MDM4	5.21989	5.35543	9.13533	9.24802	2.22594	1.41211	1.70242	5.79428	0.735589	1.73027	2.19903	5.38631	2.27654	2.476	2.21135	2.89629	4.82018	4.04652	2.3459	2.94533	7.69404	4.85913
ERRFI1	0.0600627	0.0472277	0.0118261	0.0111364	0.828464	0.142743	0.560155	0.127635	0.0989252	0.207518	0.21504	0.299241	0.274924	0.0590154	0.560487	0.465866	0.0617485	0.204338	0.0552863	0.183432	0.2308	0.109768
IGF2	0.180982	25.7812	31.9316	8.61707	0.978947	0.433083	13.3024	38.5226	2.00407	0.679876	0.415568	39.6127	1.89474	2.12136	65.4905	56.0593	9.52012	36.06	17.4671	12.7229	1.21778	54.3368
SNORA78	4.79224	25.3921	51.9386	8.1924	2.73323	6.97736	121.572	122.561	0	0.824576	0.419563	206.459	4.31932	13.5885	42.9798	26.1609	4.90137	11.5538	39.5651	126.073	0.82215	113.139
LOC100133331	0.478746	93.8805	88.813	101.164	1.89463	0.911863	29.8767	65.9181	0	1.87497	0.749708	92.8935	0.549645	5.61157	3.49583	0	85.93	56.3811	26.4532	55.5471	69.5684	130.313
SNORD100	11.8703	2.01331	112.494	14.5534	3.96674	4.20998	90.0299	363.563	0	0.464033	0.25447	476.184	6.32432	8.14304	37.9459	58.4944	29.1593	37.553	39.4428	48.368	0.493971	92.3763
MDFI	14.8821	15.7349	58.3961	57.1043	3.05374	6.93892	4.70106	0	1.73084	4.10663	4.84675	43.6441	16.2653	8.357	6.94863	7.376	22.2659	3.60544	5.10123	52.5605	1.9387	84.9765
SCARNA4	98.0224	36.3701	69.6045	72.7378	5.78619	6.18106	79.8178	68.7275	0.285661	0.904674	1.37776	69.0714	8.57508	2.50037	11.5338	54.9285	18.3906	0.151653	7.7801	53.1349	0.237018	46.1136
GABRA3	3.08227	40.6153	58.0032	3.89106	0.35378	0.903757	56.0444	30.0724	0.503537	1.01907	0.0793135	267.62	0.371521	7.49252	11.2291	5.52377	107.87	424.627	47.8793	54.4341	198.04	17.7313
SCARNA23	39.5044	14.4301	50.7231	15.523	3.26537	4.65517	145.461	250.901	0	1.02356	1.04862	357.837	13.1212	13.8595	29.5656	11.9088	56.7411	2.91647	10.5652	124.088	0	189.48
SNORA76C	3.12986	6.56859	19.8541	6.54314	5.4279	3.17549	110.773	146.38	0.896753	0.809886	1.67417	154.175	4.51623	3.9222	16.9857	36.4993	13.3083	5.85434	13.847	26.4858	1.19333	35.9123
SNORD114-1	10.3375	15.6725	156.912	5.58531	8.07347	1.82316	416.257	799.412	3.08219	1.27024	0.254047	472.674	4.10212	10.5729	53.9141	21.3026	1.57659	26.6189	16.1731	34.1918	0.493151	96.7285
SCARNA27	30.7182	35.6078	88.7707	33.5061	4.25866	3.40391	80.8039	204.823	1.50587	2.07402	1.56117	147.645	3.74078	1.43547	17.0975	18.895	9.49777	6.66201	0.804469	69.652	1.24944	114.833
UPF2	1.01938	15.5639	10.1623	15.5639	1.77951	1.97893	3.20251	5.17839	1.17133	1.7144	1.47951	5.32204	2.00366	3.40155	1.69151	5.40919	4.87242	1.45405	12.1564	13.0218	1.57049	11.1833
SNORD83B	0	16.428	49.9558	9.5334	6.81844	8.11947	109.73	116.207	0.75635	1.98401	1.26152	63.4064	6.97648	25.682	25.318	25.7328	25.3857	3.4064	71.7968	104.201	0.372531	157.877
RN7SK	0.00544381	0.0303345	0.059352	0.0315073	0.149366	0.149366	0.109115	0.0312081	0.0353794	0.192479	1.34748	0.0635773	0.320797	0.229149	0.0946602	0.229149	0.0390585	0.192479	0.0353794	0.0272318	0.102822	0.030106
ZBTB47	2.57802	12.3913	14.065	23.0052	0.432406	2.23438	2.07165	2.14516	4.29319	2.76525	1.32373	3.72843	2.18779	4.57868	4.7149	4.57868	8.18113	2.62	9.56807	10.9887	10.5576	17.3197
RANGAP1	13.4317	13.8856	14.9723	11.7647	0.772502	1.69271	3.25895	6.67326	0.510228	1.36401	0.885769	5.32844	1.90319	3.19627	3.94441	7.01439	6.48876	3.36781	8.93339	11.0024	7.84588	10.8684
HMCN1	0.119445	0.630724	0.381171	0.334014	0.0498321	0.154492	0.160325	0.168389	0.369556	0.283979	0.365258	0.0628417	0.244088	0.132391	0.55978	0.0401826	0.145337	0.162468	0.298916	0.202092	0.69529	0.187777
SPACA6P	6.00628	8.47605	8.77138	24.3389	2.48979	3.33568	7.69223	3.64706	0.43612	5.66812	1.50404	7.348	3.51962	4.74504	5.73907	5.39821	3.89789	2.7619	10.3382	15.7501	1.25828	23.9048
TVP23C	2.83507	19.9346	21.585	23.1327	0.893498	1.58522	4.04969	4.39049	0.597329	1.84603	2.50453	8.63924	1.75562	4.93064	9.51847	4.53294	12.5158	2.28151	10.8842	15.1889	24.5114	14.4545
SNORA37	2.57824	15.8982	23.0249	16.1152	3.90601	3.02723	67.6456	107.587	0.328379	0.564659	1.23457	74.4944	9.59536	8.81799	14.89	7.7276	3.26844	2.85838	24.2452	34.6859	0.185844	60.2546
UBTF	2.65821	9.54936	6.069	4.30352	1.1867	2.23649	3.43654	3.15976	0.905088	1.78122	1.13192	5.04047	2.39378	4.43839	1.70623	0.786952	5.22809	1.54937	8.28417	7.40318	2.38684	6.94878
SNORA80A	4.06491	8.62971	72.6398	14.0626	2.0736	2.78537	73.1541	152.486	1.98514	0.483429	0.199543	95.904	1.19931	6.8256	17.6009	27.2633	33.9696	15.6322	35.9177	68.6407	1.0224	57.4683
FBXW4	2.72599	8.67508	9.20642	26.7695	1.32756	2.67009	4.9052	1.6571	1.83618	3.19782	1.36663	5.65522	2.80383	2.86924	4.0028	1.6296	6.08394	2.58588	7.0715	9.26551	6.65191	13.2327
SNORA45A	4.07831	18.2719	73.5231	26.4991	5.47888	3.9112	88.9878	149.342	0.606985	0.43857	0.91827	80.7411	13.6385	2.55263	26.4991	15.2248	6.56643	0.803541	4.78185	31.0502	0.0571484	40.0471
OGFR	2.88653	7.23108	2.24563	7.66606	1.09875	1.9122	4.2779	2.4472	1.05582	2.45428	1.4809	2.09705	2.63725	4.81631	1.94139	7.32973	11.219	3.26296	7.7729	8.97209	9.71395	6.22552
SNORA71E	3.71746	52.9614	38.3105	8.93835	3.82496	1.76269	110.793	38.727	0.211839	0.777797	0.377042	91.882	3.32461	6.31881	7.88784	9.06245	9.06007	22.6478	20.9159	48.5926	27.4853	54.5367
SNORD38A	15.0112	3.97182	63.0063	3.13344	5.54169	3.99068	109.369	222.676	0.561714	0.593153	0.108989	217.067	8.25803	9.01677	29.9804	40.7788	2.09176	6.38845	23.1497	22.391	9.6183	28.5133
RNU4-2	33.7895	8.80771	13.9252	12.0568	1.32873	4.60011	9.19987	13.9252	0.0998925	0.712167	3.58424	11.0045	5.13192	8.29972	4.79085	11.0045	11.0045	7.64091	6.13376	15.5367	3.87506	15.5367
SNORA72	14.6345	21.5445	92.5391	12.7758	3.11618	1.35131	84.6202	311.823	0.346541	0.258732	0.29962	195.025	8.62397	2.67312	22.5962	11.2756	5.22291	7.35913	5.56208	40.8395	0.148134	55.287
KLHDC4	3.74525	16.7302	7.07312	10.9303	1.32796	2.27358	4.28228	4.3163	0.729123	1.40826	1.10479	6.27012	1.4536	6.15976	0.871316	7.41763	7.11323	1.63405	8.99417	14.8026	1.88905	9.83349
SNORD31	13.7906	0.677076	91.5075	1.4308	5.02058	4.51278	67.0273	177.809	2.17175	1.14017	1.42761	142.221	6.00426	11.5742	33.4194	24.0043	3.18737	11.0312	15.774	24.6622	0.421576	75.1618
SNORA14B	21.1157	12.2403	34.8694	17.5241	3.30325	3.18915	58.4411	62.0552	0.107805	0.345195	0.607994	44.0307	7.018	3.90749	10.6604	28.0439	9.24586	2.0016	5.13776	17.255	0.0267396	20.8634
RMRP	9.16069	4.05173	5.14583	5.14583	4.05173	5.14583	4.05173	9.16069	0.117848	2.84583	4.05173	5.14583	2.84583	4.05173	2.84583	36.027	4.05173	5.14583	2.1809	2.1809	2.84583	4.05173
SNORA49	0.50062	6.23833	7.7141	5.30788	3.87275	2.97579	15.8401	17.0152	0.210922	0.924236	2.62563	10.6685	7.28475	7.87995	5.5438	5.97349	3.89961	3.85671	4.67066	6.82471	0.620894	9.54685
MTRNR2L2	4.48557	8.97807	28.7044	3.16144	3.71372	1.86991	18.6432	31.6938	0.853227	0.366163	0.216409	47.1355	1.16716	4.14913	4.5704	5.44643	9.11571	4.81653	7.85909	13.1993	52.0372	14.5705
SNORA11	14.2885	13.0911	36.5663	22.5429	1.44842	1.79405	36.5663	28.399	0.138754	0.32275	0.61859	38.3919	3.07126	4.3419	17.0788	8.45844	9.73598	1.439	7.0196	20.6281	1.20724	27.8833
SLC12A1	0.00470874	0.00883297	0.0286952	0.00813178	0.0345609	0.516982	0.0329939	0.0132549	0.00124861	0.0402533	0.193495	0.000997798	0.0451823	0.0743998	0	0.0599257	0.00527252	0.014557	0.104336	0.0149528	0.0326242	0.00804455
HOXC8	0.179697	17.7075	2.26552	4.59736	2.48541	2.88906	8.75384	17.3847	2.67871	3.25112	1.84811	8.92274	3.26738	5.15725	4.46458	1.59444	2.79851	0.887535	17.8395	14.8363	0.916781	12.6216
SCARNA10	10.5529	3.48924	5.05068	2.80876	2.45417	1.28561	9.76757	8.16961	0.431101	2.27399	2.89155	11.1515	2.75839	4.22526	2.00948	5.23961	4.96655	4.77755	5.92349	5.50685	1.37069	5.54041
ZNF587	3.81645	5.07406	10.0343	14.8852	2.63316	2.24396	3.54661	6.76785	0.799645	2.4424	2.21901	5.99712	2.11878	2.10186	1.1356	2.22889	5.972	3.32103	4.20274	7.27791	8.73642	11.6656
SNORA21	11.9223	9.37414	16.2052	8.31022	1.70406	2.49631	21.3549	28.5216	0.110506	0.446834	0.436587	19.0167	4.23417	8.06172	4.81964	13.4192	13.168	4.86564	9.0717	13.6719	4.37284	19.0167
RNVU1-1	9.57158	1.43864	27.0339	0.871905	5.78848	3.52637	78.4037	94.8003	0	2.73681	1.18192	200.611	5.31862	8.39451	49.9844	181.536	6.19053	5.84661	7.79386	11.0974	45.7024	103.34
FLI1	1.05912	8.87271	5.25182	5.81652	0.455283	0.918319	4.66224	4.91408	1.34309	2.03483	1.62481	15.0832	2.4586	2.49412	2.5994	1.56954	11.0786	13.722	4.55796	7.61865	15.2034	4.99373
ASPHD1	0.767763	45.6929	109.183	95.6891	2.0046	5.0516	10.15	22.2317	0.179078	2.59128	0.450368	34.8367	5.96369	8.41733	0	2.53716	16.838	5.71713	30.3403	44.9225	26.9051	130.268
CRYBG3	0.165132	0.320662	0.167366	0.3019	0.34518	0.437331	0.295355	0.127034	0.461724	0.468742	0.725692	0.026528	0.463244	0.390039	0.140564	0.0549996	0.309375	0.496848	0.447239	0.168894	0.455429	0.21504
SNORD53	2.54478	23.9366	23.8097	0.671642	1.65672	3.34701	66.7388	192.123	1.68657	1.33209	3.77239	242.328	5.1791	9.96642	39.5485	34.0224	4.76866	14.5	16.153	25.7537	19.5336	96.6082
RNU6-31P	116.371	48.0638	217.523	13.6322	0	2.90881	67.386	211.003	2.44377	0.574468	0.620061	232.468	5.31611	9.4924	26.2249	72.465	9.1003	11.0061	4.75988	10.2948	6.48328	194.535
SNORA20	1.19782	13.594	19.1088	8.43131	4.53637	3.77349	30.0807	46.0341	0.203579	0.522323	1.77327	23.7564	7.30567	5.51231	6.49576	9.40678	4.33195	1.45002	9.95773	17.206	0.211651	21.6029
INCENP	4.88528	13.7803	8.0696	11.5013	0.745406	2.40115	1.96613	2.92363	0.966894	1.98277	0.828063	3.90379	1.31334	2.97576	2.49901	1.30283	6.43337	1.45123	9.64898	10.9547	2.3787	11.1386
SNORA74B	1.29458	10.9073	11.545	8.69569	2.87859	1.59485	21.537	21.7435	0.14909	0.374555	1.30324	17.448	5.10454	4.517	4.88752	5.61032	7.71611	4.09245	8.22795	12.211	4.83513	12.3553
TIPARP	0.0308352	0.280979	0.110245	0.00788996	0.154498	0.0958603	0.184958	0	0.214881	0.186219	0.267427	0.0857161	0.175431	0.150365	0.531177	0.7971	0.224461	0.385561	0.147091	0.0811807	0.175216	0.434833
C16orf72	5.20984	5.01166	2.1339	10.0407	1.60832	2.2677	3.8882	3.57577	2.50498	2.67702	1.96799	2.65065	3.44243	4.00059	2.53368	1.82775	4.86506	3.33376	6.74866	6.94614	11.1783	8.49629
VHL	2.29566	8.21558	6.19323	10.8462	1.18483	1.34635	3.48912	2.9025	0.736301	1.14576	1.15718	5.3004	1.87411	3.21505	3.55872	5.74445	5.30404	2.9929	5.98782	8.3426	9.13378	8.63916
SNORA5C	2.71417	1.68425	4.15512	16.148	5.86772	5.41181	113.327	168.546	2.8748	1.41732	4.05827	150.612	8.12362	6.68504	19.4339	32.7874	4.77402	8.15906	14.374	19.9063	0.522047	34.9819
SNORA8	0.307363	12.4497	21.4746	7.1384	3.86008	3.89927	38.7691	40.2779	0.560283	0.690321	1.69687	21.2035	7.10294	6.43906	8.04105	2.159	10.2573	0.882734	7.98225	21.5426	0.0343761	27.9254
LOC729737	12.7714	41.8674	34.4943	16.7505	0.474958	1.36672	4.43336	25.2753	0.259325	0.734912	0.794007	9.24581	0.676132	2.97737	5.1337	6.8575	31.6462	32.2654	14.1667	7.71218	28.7581	25.1775
SNORD95	4.06818	2.54683	37.7486	6.47039	2.99656	2.14463	89.6433	118.756	0.522039	0.358127	0.328512	126.252	4.30234	5.07645	21.0909	12.6391	1.39187	5.89256	10.4366	17.7569	3.60537	37.2197
ADGRV1	0.233691	0.434618	0.172237	0.211047	0.14326	0.378667	0.123428	0	0.0141621	0.106609	0.310869	0.0353665	0.0927125	0.0816176	0.0430842	0.15369	0.658543	0.171064	0.373275	0.133848	0.737016	0.163977
SNORA32	12.9982	43.0581	120.599	43.824	6.49546	2.56443	143.612	218.033	0.820327	0.675136	0.562613	82.5626	9.15971	1.44102	23.3793	32.3956	7.83666	1.22686	0	39.5681	0.401089	79.3902
NPEPL1	2.33967	20.3805	4.42712	42.3156	0.560666	3.10033	12.2675	15.3176	2.38295	1.41932	0.907413	4.23111	1.3855	4.61119	6.12901	0	18.2468	2.37002	4.69029	28.0935	19.6337	39.0078
SNORD42A	32.2252	3.7803	196.587	6.9536	2.17361	4.72192	93.0267	185.33	0.50192	0.719004	0.284836	67.2048	8.74697	5.01091	16.6339	26.4967	5.22384	1.26517	5.16024	42.4932	0.305577	79.067
MED18	14.5608	60.6711	58.7289	93.3718	3.68451	1.72325	8.16364	44.6214	1.69469	1.4596	1.18203	15.001	3.2202	4.56848	5.11628	58.5721	4.82554	8.04061	15.7297	10.5189	95.3257	7.20791
SNORA13	3.86329	19.6843	54.1013	12.3609	2.74286	1.38045	64.3628	125.858	0.278879	2.30075	0.403964	66.055	4.31688	2.87779	14.5928	7.11511	12.6599	0.196446	13.8254	19.6626	0.557758	39.3986
SNORA36C	9.47846	86.3703	23.6178	27.8662	6.5582	4.44638	147.547	279.173	0	1.02291	0.0824931	138.39	11.45	5.65078	59.0403	0	19.9221	12.4812	9.6517	81.7012	1.08891	175.991
EHBP1L1	1.74514	1.64488	2.10883	5.44211	1.47461	2.14911	3.42491	1.28843	5.78835	4.75244	1.82606	2.64953	2.93987	7.09901	8.48656	4.08015	4.56123	1.23644	5.00121	4.62806	1.63421	5.71168
TRIM65	0.771038	8.32816	16.4693	8.19134	1.82853	1.40554	9.35501	2.45105	1.17453	2.00325	1.6984	6.84739	1.0391	6.14379	4.40414	0.973063	0.918168	5.52043	10.1573	7.35454	11.4862	20.6272
SNORA12	4.36019	7.91782	12.1959	6.62038	3.7455	1.92479	18.1558	12.2353	0.26766	0.839668	3.06126	11.0876	5.43638	3.07557	4.39479	3.32415	4.16295	8.71525	2.29506	8.2985	0.195584	12.5908
RUNX1-IT1	35.114	15.8127	10.4784	17.2394	0.474705	0.482466	22.4521	27.2225	0.346651	0.708824	0.616988	132.771	0.549727	2.8146	11.067	0	24.9511	78.8089	8.60937	12.8106	57.8998	3.01638
AP1S3	0	37.5551	19.1471	17.8667	0.603263	3.0258	5.50252	21.4708	0.255188	1.8792	2.09968	9.29239	1.18056	2.60706	2.71918	3.25203	9.30088	1.41702	11.9042	10.4969	10.9821	11.1823
SNORD23	5.38033	8.87357	33.935	2.09781	2.40219	1.74662	144.286	294.307	1.25494	1.17066	0.187305	275.01	11.5754	8.80333	46.0208	42.6961	11.3085	5.65193	2.44433	10.7279	4.67326	69.345
SNORD67	2.17385	11.013	27.4068	25.2159	6.53101	3.19361	138.731	133.706	0.686777	0.822998	0.20433	137.579	8.1543	2.47656	38.6771	20.7793	1.43977	0.346227	13.6372	27.1741	0	52.8535
SCARNA16	3.90421	0.69812	25.6264	8.99296	3.25167	2.32992	28.7942	17.4692	0.904619	1.79547	5.11934	17.2303	6.75145	4.9725	13.8275	9.51426	3.31316	1.32649	3.0516	8.82501	0.305313	15.3097
SCARNA3	22.7641	0.48724	25.5186	1.04666	3.3549	3.12359	75.0678	59.2399	0.595516	1.30095	2.00638	81.6693	13.272	7.83194	19.0319	30.5518	4.69686	0.785818	4.30806	8.65713	0.362559	42.4752
SNORD105B	2.54712	1.19493	57.8619	4.35434	3.86709	4.97178	91.4656	95.5493	0.34546	0.580063	0.429247	64.1704	4.56703	12.2097	12.6686	13.6457	17.0938	9.18433	12.8581	27.1225	2.29189	25.8347
EGF	0.214672	0.154926	0.166942	0.134842	0.15714	0.441428	0.0985544	0	0.412955	0.0360077	0.276712	0.211365	0.171583	0.0958871	0	0.760216	0.176851	0.0460632	0.293329	0.081284	0.337899	0.0311
FAM50A	0.365927	12.8295	5.02425	4.27962	1.35982	2.332	4.54753	5.06869	0.794128	1.6067	0.702345	5.6286	2.22083	7.7917	2.30158	8.66177	4.69761	1.55272	8.66177	8.15275	1.67153	7.7917
ANK2	0.980509	0.119135	0.168414	0.394157	0.984036	0.346573	1.19688	0.195788	0.483172	0.144454	0.221204	0.171693	0.0552895	0.298709	0.445414	0.454332	0.107207	0.262717	0.319803	0.13314	0.23651	0.121526
SNORD123	0	0.953857	170.747	7.4881	7.75415	2.85508	228.089	376.566	0	1.52487	0.11031	591.015	7.12473	5.91132	56.5242	84.5105	18.5775	86.6193	7.59193	19.6287	3.22495	88.274
SNORA77	18.184	1.35276	32.1166	1.65644	5.78834	1.97853	125.255	369.644	6.97546	0.579755	0.892638	305.972	6.55215	12.046	62.5859	157.408	2.89877	17.0798	10.7669	34.408	3.11963	125.19
CUBN	0.418046	0.0968655	0.107663	0.0169002	2.86893	0.0182386	0.259034	0.478952	0.0182195	0.0212697	0.0349725	0.456221	0.00872814	0.167792	0.0316225	0.121671	0.0431855	0.00941505	0.0287304	0.0269967	0.104847	0.040367
FKBP5	0.114922	0.142643	0.218824	0.263976	0.967248	0.312859	0.654171	0.267419	0.23337	1.13755	0.162998	0.707747	0.501527	0.193001	0.0508258	0.584618	0.724704	0.0334266	0.227504	0.14899	0.100177	0.0232717
CCDC12	0.122194	15.5218	2.67337	7.5089	1.62265	2.75972	3.73823	6.53773	1.40783	1.66977	0.823345	5.06152	1.63499	3.03006	1.14345	3.30742	2.28563	1.41964	9.90374	12.1052	1.84003	10.7803
ZCCHC3	4.555	10.3435	0.0302779	21.0258	1.38753	1.88046	2.84693	1.51914	1.36755	1.99996	1.25552	8.17321	2.43152	2.77305	2.37419	4.80833	4.03301	1.53388	10.2083	15.0863	20.3459	11.2918
HDGFRP2	0.276851	7.59869	5.23401	8.81331	0.900589	2.22157	3.27954	1.94595	1.49484	1.96748	0.944135	3.17459	1.98942	4.0097	2.7413	1.7319	5.12766	1.2242	6.80958	7.09207	10.1231	7.81389
LRP2	0.0529479	0.103528	0.128098	0.067293	2.64443	0.0467832	0.572583	0.903545	0.00242689	0.0849223	0.0753247	0.474295	0.0192126	0.313075	0.00589851	0.400511	0.101817	0.0953059	0.0097038	0.0797873	0.115859	0.0424655
C1orf35	0.940901	16.4382	2.66886	9.27765	1.3746	2.73353	10.0664	7.6851	1.83685	2.79691	0.897973	2.06807	3.04176	3.39808	1.28708	2.02348	6.46287	0.222375	10.8964	17.4239	1.32246	12.7115
SNORD50B	18.6611	3.86254	136.804	1.6999	3.4659	5.09024	105.271	388.86	3.42812	0.812172	1.82267	247.882	9.5383	4.42917	30.6453	51.3841	1.08604	1.72823	7.65897	10.6621	12.8437	81.17
RPPH1	12.7709	4.45266	7.9267	3.50594	1.88712	2.46248	7.9267	4.45266	0.0829161	0.878663	1.34799	7.9267	3.50594	4.45266	1.88712	12.7709	7.9267	12.7709	2.46248	3.50594	3.50594	4.45266
GSTA1	0	0.021482	0.164478	0.0324038	0.660516	0.0082456	0.175038	0	0	0.0119344	0.00781162	0.489818	0.0237965	0.0658925	0	0.622687	0.0227839	0	0	0.0816604	0.0245198	0
PLEKHA4	0.755877	4.28014	5.38316	6.62154	1.15414	2.06798	2.07908	3.2995	0.759934	2.41796	1.98175	3.43475	1.68156	2.02557	2.44751	4.69323	8.5487	5.44213	3.97512	7.55209	3.87764	6.64795
ZNF818P	6.63903	18.4056	5.77524	28.9437	1.82168	2.98464	4.47274	21.9626	0.789804	2.4064	2.06699	6.10881	4.63369	3.40258	3.52394	3.36429	1.85802	1.45306	8.15503	26.9714	37.5926	7.97916
SLC12A3	0.115142	0.484882	0.216778	0.205465	0.311833	0.0369694	0.608107	0	0.00241278	0.234452	0.0178732	0.201803	0.0643474	0.0604857	0.0157927	0.149147	0.180892	0.0637692	0.00212697	0.0513264	0.27398	0.156425
SNORA52	4.46879	2.02301	44.1346	12.5949	7.39407	3.84174	211.457	166.372	0	0.408575	0.547604	132.276	11.1791	5.76261	17.6936	17.529	0.655422	5.26608	2.30107	19.5832	0.627049	34.8849
RAB13	1.53954	4.19054	4.75532	2.32383	1.71754	3.23658	1.9939	6.82137	0.60436	2.34246	1.82697	3.00205	3.58959	2.30449	1.22605	2.23947	7.02398	3.18021	5.00016	7.54134	5.95897	5.52257
LINC01002	0	110.178	37.6207	40.6068	0	3.64087	46.8622	79.6579	0	1.09133	0.185759	114.116	0	1.76006	51.2183	0	36.1858	7.02632	43.7833	97.7136	27.2229	226.189
FEZF2	11.9273	3.08304	66.2388	3.0519	0	2.85467	36.9862	126.176	2.78201	0	0.176471	24.5917	0	5.92734	24.6644	59.1903	34.2042	27.5087	5.41869	31.4014	74.5121	37.6817
SCARNA6	4.78514	2.41507	12.3781	9.20849	2.64283	1.42772	10.3247	14.17	1.28928	1.88363	2.17978	11.8953	2.04398	7.31214	4.58106	2.54236	7.58158	6.81464	2.72365	6.21883	0.0331663	11.6105
FRAS1	0.574925	0.454552	0.251328	0.0981365	0.493709	0.52808	0.222781	0.249185	0.287385	0.355738	0.31415	0.244819	0.33487	0.240717	0.150526	0.678819	0.445053	0.640641	0.166055	0.180656	0.515776	0.173285
MAP7D1	1.71777	4.78979	4.20837	10.1025	0.581478	2.03878	2.13604	2.50526	2.37502	2.10113	1.13599	2.10921	2.97204	3.59544	3.81798	0.682517	4.44751	1.68543	4.99387	5.40798	3.38211	6.83243
SNORA44	2.56552	8.86122	56.305	25.4675	3.05305	3.3428	61.6422	57.8696	0.142774	0.458766	0.841736	34.2109	6.81976	4.14884	15.3665	9.37184	1.8886	0.389689	1.85753	16.4253	0.700012	31.3418
USP35	2.64032	9.88238	7.16968	14.2797	1.01358	1.42084	3.62726	3.7462	0.396656	1.33141	0.834619	6.27255	1.00529	3.61149	2.73049	6.26333	6.8206	3.37582	5.19747	11.8259	4.98291	12.2808
CENPB	0.242608	5.85119	8.91237	3.49277	1.07799	2.05436	1.58934	2.94746	1.65576	2.09369	1.29205	3.22979	1.34937	2.06584	2.13209	1.12594	4.60028	2.59998	8.38294	4.39418	16.4635	5.96421
SNORA4	1.77711	14.3499	16.5508	8.59323	4.72349	3.89758	68.8943	141.918	0.414504	0.753222	1.61316	83.8799	6.50524	5.13181	20.5953	10.5992	0.869222	1.41519	1.25434	27.911	0.341811	67.657
ASS1	0.189453	0.113133	0.15264	0.145885	1.73364	0.173357	0.697733	0.134996	0.112486	0.0776004	0.0612731	0.716133	0.0547861	0.097476	0.181283	0.379223	0.578016	0.207999	0.0455067	0.139008	0.490977	0.165882
LOC100190986	4.09008	12.6268	13.2644	29.4584	2.14881	2.88954	11.0124	13.9374	1.8266	2.16372	0.65932	8.75233	1.59154	2.32883	21.4514	2.87463	0.264875	1.04918	3.64059	19.7108	7.48643	30.9926
LINC00265	39.7206	15.3965	27.7238	15.0568	1.02829	0.764174	1.99174	0	0.531231	1.27221	0.911822	15.1104	1.37846	1.79322	2.68159	2.20723	10.9099	31.7975	4.06878	5.24771	12.3645	10.6363
HEXIM1	0.805261	2.55516	7.9639	3.847	1.73259	1.86417	3.19176	2.06516	1.60472	2.2264	1.10635	5.51447	1.66405	2.17924	4.94223	2.4038	3.41071	0.328379	6.6385	6.97135	10.9257	6.42773
SOX12	0.983535	6.0428	2.97773	9.27102	1.16191	1.51003	3.00115	3.31435	0.283172	1.54634	0.826816	4.00707	1.1413	2.30498	1.53193	1.78427	6.95099	2.89885	7.74231	7.68886	11.0831	11.3549
SNORD81	4.69617	7.80375	48.2852	11.9225	4.94637	3.9189	52.6483	110.809	0.765422	0.666228	0.623293	59.9472	4.57625	5.61556	13.0492	10.4687	2.9921	1.35466	4.70061	28.9972	0.735812	33.1737
SNORD44	21.2272	2.88522	209.823	10.5412	5.13166	4.52137	91.052	260.114	0.862005	1.0686	0.327704	118.216	5.59947	1.88549	18.8264	21.0158	8.9715	0	0	32.5615	1.18021	74.8472
SCAF1	3.10303	4.31263	5.89864	4.61686	0.84809	1.53344	2.64348	2.72314	0.927046	1.42526	1.04527	4.18558	1.349	2.21823	2.30626	1.65471	3.86035	2.98807	5.36921	6.29378	9.18469	4.26808
CYP20A1	3.04774	8.10374	5.54666	9.19211	1.92444	1.1657	2.1606	11.2886	0.522136	0.976335	1.10518	6.93348	2.08152	1.77368	2.15571	0.525541	3.05521	2.67499	3.50172	4.65364	9.38676	6.73609
NOM1	0.483152	8.94035	8.11847	9.7635	1.12542	1.92604	2.29061	1.87641	1.16656	1.50198	0.862448	3.81601	1.25775	3.19523	0.914258	5.49552	4.43499	1.89091	8.11847	8.55784	1.095	12.0675
GNB4	4.14998	6.53167	4.79839	8.64369	0.77552	0.721432	0.462147	4.1147	0.752302	1.54819	1.70319	3.55177	2.90181	1.56933	7.36167	1.24117	9.45501	1.36348	5.29906	4.32794	9.61455	11.6516
SNORD58A	0.633387	6.55531	24.6949	7.58287	3.22843	4.97224	48.2564	45.5811	0.407748	0.552915	1.33127	29.2548	6.83726	9.54872	4.88898	4.35623	9.21605	2.27716	5.97145	14.2474	0	31.6583
ANO8	1.53681	4.02492	9.69781	12.076	0.583983	1.31696	3.15966	2.00687	1.1332	1.25533	0.818499	4.35265	1.2541	3.95898	1.53886	1.17566	5.56122	2.63443	5.99887	6.30384	6.93745	9.33983
SLCO3A1	2.38735	4.97227	1.37817	17.6787	0.537435	1.16348	1.69614	1.13282	0.832875	1.85211	1.84593	2.52245	0.876664	2.97321	2.22173	2.36353	1.87246	7.66588	7.04396	8.22263	0.429381	9.90654
GOLGA6L3	5.51788	14.7631	3.69126	17.3316	0.948631	2.70951	3.84885	3.31376	0.587613	3.02942	0.398539	7.60536	2.52517	2.91522	6.30126	6.43829	2.27312	0.925792	13.8761	12.5886	1.91961	28.4702
SNORD35A	2.76155	3.24774	11.215	4.8	4.21394	2.86142	62.8583	91.6552	0.400258	0.544258	0.445161	76.5832	3.18581	7.33316	14.7345	6.85161	4.18142	1.4369	4.71097	11.736	0.384774	36.1169
MS4A14	0.313679	0.00902893	0.038204	0.341257	0.0814446	0.0550949	0	0	0.113199	0.138198	0.268043	0.25066	0.333272	0.0487685	0.23899	0	0.00706345	0.019532	0.195013	0.32412	0.281862	0.0694675
SCARNA12	5.14838	1.39883	15.2195	8.07912	1.66384	1.44243	16.2358	17.2098	0.818359	1.3875	1.85252	23.1819	1.9698	4.50612	1.26198	10.1248	8.00589	3.87622	3.80699	7.18375	0	11.3845
CMBL	0.0339917	0.277739	0.249661	0.0322651	1.67245	0.152455	0.316738	0	1.35645	0.1146	0.0879467	0.146153	0.0907739	0.186274	0.112507	0.275732	0.233733	0.379757	0.227474	0.131542	0.32155	0.133226
RASGEF1C	9.75999	23.5237	51.0193	11.6354	0	0.397335	10.6775	22.0991	0.865468	0.238401	0.24996	5.89645	0.614063	1.89131	7.19538	5.04543	1.84652	21.5572	7.13614	26.0738	51.7272	1.63413
RNVU1-6	48.5673	31.0711	75.9894	15.7126	6.98487	2.26021	71.2239	102.472	0	0	1.11649	12.4584	6.80787	9.32678	32.351	34.1346	81.177	4.3298	4.35703	5.51437	37.4705	31.7519
SNORD60	5.32365	3.13916	64.5568	30.9128	4.93714	4.16589	73.2286	61.0466	0.491331	0.667615	1.6205	48.1195	5.48743	3.01469	11.8789	8.26628	3.9241	0.901072	0.310879	16.8297	0.078613	34.9471
SYNE1	0.147927	0.206705	0.179979	0.193694	0.446384	0.704386	0.392649	0.102531	0.157669	0.731367	0.951603	0.166039	0.52581	0.548893	0.265492	0.4407	0.225046	0.310047	0.325807	0.132359	0.149109	0.0837372
C14orf80	17.0027	0.47695	20.0594	15.0426	1.50177	3.31472	13.9016	30.4282	1.0789	2.40691	1.58954	4.39362	1.66667	6.53457	3.44947	0	6.9078	9.31915	9.34397	6.84574	21.5789	21.8839
LINC00461	2.59975	8.69886	13.3037	3.32402	0	1.21601	13.582	42.202	0	0.895807	0.526048	89.3177	1.25413	0	29.1194	7.55527	14.4015	23.5502	27.4765	29.4358	59.5654	0
COL6A1	1.06219	6.79381	4.37127	4.45469	1.07677	1.41769	2.61235	1.83187	0.490664	3.46596	1.15946	4.20915	1.28323	3.95776	5.51672	0.711377	6.31285	2.37832	3.29453	4.45469	5.70691	4.45469
UBR4	0.356712	0.372538	0.585484	0.448029	0.895118	0.523224	0.576105	0.460793	0.49823	0.709891	0.638024	0.3925	0.348363	0.793329	0.672474	0.504093	0.393618	0.389021	0.321655	0.202482	0.23329	0.189661
SLC15A3	11.3053	21.213	2.88988	27.5934	0.846096	1.79575	1.25309	9.71975	1.03302	3.24976	1.82838	1.22668	6.19504	2.90127	3.22904	10.5793	4.94609	0.473793	21.9876	25.1136	3.71682	25.9131
NRXN3	0.986582	0.570334	0.405148	0.293275	0.0337548	0.0183022	0.0391172	0	0.00669655	0.0701001	0.0609296	0.393257	0.0291825	0.0850346	0.037252	0.384722	0.335488	0.104295	0.162764	0.233745	0.161261	0.0470184
PAH	0.123994	0.0943163	0.0139844	0.0259454	1.38794	0.00373218	1.16296	0.534377	0.0134673	0.0359279	0.00152885	0.131031	0.00955529	0.00852107	0	0.198975	0.0740816	0.117226	0.0117361	0.084064	0.178335	0.0816134
GSTA2	0	0.00792016	0	0.0167721	0.105012	0	0.122529	0	0.0338237	0	0	0	0	0	0	0	0.402344	0.172939	0	0	0.0205924	0.800868
GATM	0	0.000927517	0.0191941	0.00320812	1.59869	0.0680033	0.44463	0.0821234	0.322689	0.0638677	0.0430913	0.22351	0.00708186	0.0958398	0	0.985765	0.0718989	0.0777477	0.0538942	0.00780205	0.34807	0.191156
SNORA66	4.42402	11.782	28.3125	10.1519	1.80348	2.35464	45.1752	34.6404	0.0940251	0.107023	0.456713	38.7335	4.18356	2.17364	11.9751	12.235	1.49749	2.67584	2.25577	16.7236	5.20291	23.5437
USB1	0.890939	12.2649	2.98435	8.98048	0.432214	1.11687	4.69026	5.18327	0.47508	1.03431	1.16686	4.90841	5.1379	4.23931	4.3836	0.683735	5.53081	3.71042	12.0131	6.39682	3.94585	9.96717
OGDHL	0.664459	0.270952	0.20255	0.13097	0.758239	0.736052	0.706704	0.0916487	0.00828078	0.447284	0.172545	0.204292	0.390512	0.357973	0.0688035	0.0806402	0.201089	0.069108	0.198666	0.238511	0.399182	0.165664
TCEA2	0	12.6363	2.71175	10.5618	1.16393	2.14599	5.60505	4.68075	1.14063	2.12939	1.15291	6.48559	3.60002	4.15965	5.09669	0	6.58051	2.43916	9.37627	11.6686	13.1918	11.8257
ZNF785	6.01529	3.06442	5.36832	3.52691	1.84542	1.05005	4.85495	7.61606	0.892881	1.79178	1.33005	6.39054	2.09885	5.18483	2.02415	2.21842	4.83539	1.42254	5.24173	9.79763	5.17004	7.90082
SCARNA5	4.00521	2.21005	5.31403	5.19147	3.21393	1.48673	7.71063	3.3481	0.440555	1.87486	3.19461	5.55483	1.26367	7.93595	3.40329	2.02529	6.32914	2.83023	1.48835	3.83134	0.500726	6.35212
ACSM2B	0.198663	0.184255	0.193304	0.108047	2.68495	0.0429899	0.616223	0.156982	0.00736844	0.0434005	0.016735	0.427742	0.0129085	0.273464	0.0243662	0.586744	0.293654	0.0525207	0.0687904	0.141145	0.261613	0.239469
PCDH15	0.211329	0.280047	0.890776	0.264749	0.0199456	0.00312355	0	0.188053	0	0.00310473	0.0108195	0.00779006	0.0335123	0.0149404	0	0.0471731	0.690154	0.116249	0.256188	0.0569201	0.340053	0.13881
SNORD38B	9.27613	3.01578	17.5523	0.35503	2.22288	1.76923	72.288	221.266	0.715976	0.761341	1.28402	108.858	6.55424	4.62919	16.2268	18.4556	0.455621	0.944773	7.36095	15.2308	2.68245	34.5523
ACTA1	0	1.141	2.79896	141.768	0.546499	40.7831	480.297	176.796	6774.18	0.270788	0.132932	59.8244	8.91138	0.283096	19.9644	5.76532	0.141548	6.41767	0	0.498496	0.611734	342.196
CTGF	0.00746024	0.088604	0.0792732	0.200475	0.178039	0.267989	0.223227	0.222199	0.0414032	1.01184	0.969787	0.192938	0.690466	0.112833	0.599816	0.15183	0.413835	0.682984	0.240598	0.230163	0.287514	0.245105
MIR6087	0	0.734542	1.53833	2.85408	2.22836	4.55565	63.3314	75.1434	3.93982	2.07502	2.01566	14.4138	4.40478	9.86315	34.5903	16.9489	1.04369	0.78648	41.77	11.1814	124.736	5.76752
SNORA10	4.13396	6.26743	6.13745	8.3008	1.34612	4.0503	60.877	107.945	0.675299	0.699203	0.463147	55.6001	4.78386	4.48207	11.1529	10.8959	0.839641	0.715637	0.77988	20.4861	0.197211	28.0443
KNG1	0.573076	0.116068	0.114732	0.0175168	0.142162	0.6292	0.0480512	0.0881818	0	0.0435988	0.298712	0.0277575	0.0415132	0.0936653	0.0895058	0.0579755	0.22602	0.0664937	0.35657	0.0025543	0.361691	0
LOC100129917	1.04253	16.2709	3.12407	6.70226	3.09178	1.45429	10.7887	4.30021	0.66802	1.92093	1.49859	10.8953	3.65425	5.1119	2.36869	1.24797	1.47617	4.10695	6.36022	3.97829	10.646	9.8731
PITPNM3	23.0577	12.0169	18.0327	28.9391	0.598193	0.745413	2.97375	2.42234	0.183424	1.02574	0.626494	5.24068	1.04747	1.69253	1.44276	12.1964	7.97793	5.18768	3.25894	6.9174	6.83758	11.7365
MEX3C	0.370862	7.29327	2.2352	7.7285	1.06695	1.71591	1.51662	8.79873	0.999677	1.46883	1.4053	2.30247	2.47094	4.16296	1.75293	1.46461	4.44163	0.578874	8.53431	8.93516	17.7915	7.02838
NBPF8	2.53629	8.01384	1.50426	4.40234	2.26105	1.60534	1.87871	5.32831	1.23275	2.86197	1.47167	1.95385	1.18937	3.73563	1.74088	1.02705	1.86709	0.716945	6.52909	11.0898	1.95842	6.29641
BTBD19	0	0.990847	7.42053	14.4489	1.39034	1.71355	12.3792	18.4609	0.571812	2.25888	1.28085	6.18129	2.07101	3.92955	1.97434	1.08941	11.2727	3.81818	4.27777	12.3991	4.70143	22.5239
A2M	0.072275	0.0558089	0.0959165	0.135514	0.408474	0.214712	0.173491	0.400248	0.187551	1.19601	0.994049	0.302224	0.615808	0.26157	0.565367	0.372912	0.46001	1.22333	0.183739	0.115109	0.180858	0.0478792
UMOD	0.00335138	0.00242675	0.0275618	0.000757292	0.0433455	1.16642	0.0358552	0.00493881	0.000959412	0.0260203	0.249061	0.00617712	0.0641723	0.0349509	0.00845359	0.0284897	0.0198484	0.00255012	0.175981	0.010459	0.0241546	0.0199062
BRD9	1.05988	9.3662	8.31195	6.36439	1.11808	1.21763	2.43965	6.60311	1.06363	1.06866	0.873306	7.56523	1.14502	2.23445	1.85098	1.33573	3.50904	1.73651	4.59514	6.91665	3.65545	5.83989
ZBTB16	0.00487872	0.0195578	0.161863	0.371312	0.52663	0.144723	0.997197	0	0.336632	0.703179	0.147256	0.310814	0.111417	0.224321	0.540594	0.0553398	0.128006	0.00863433	0.157342	0.257792	0.00158093	0.377786
UBAP1L	9.65046	14.0395	2.38674	6.31689	2.18917	0.862153	4.31547	15.2027	1.11148	1.34882	1.17562	2.11946	1.00841	1.07555	6.86515	1.07213	9.51917	3.44348	7.86842	7.71746	2.23877	17.5031
AHNAK	0.115257	0.0987385	0.0826874	0.0969957	0.54456	0.312743	0.221846	0.0473804	0.149207	0.689093	0.596631	0.227637	0.410713	0.378112	0.326333	0.326333	0.0889075	0.455257	0.231957	0.0734567	0.147418	0.105491
SLC34A1	0.151418	0.115051	1.34052	0.00581084	1.2549	0.00630496	0.114339	0.495463	0.0118391	0.00464472	0.00741178	0.503883	0.0065026	0.0430081	0	0.308943	0.0399446	0.0523766	0.0855616	0.104299	0.246071	0.511729
PRKCB	42.695	4.47396	14.7821	1.84091	0.200521	0.682647	0.6192	5.85547	0.223958	0.622869	0.877012	5.38494	3.69058	3.78587	1.64441	3.44508	9.84837	15.9121	11.2487	6.03397	6.85677	4.58783
GNL3L	5.81089	4.14443	7.06175	5.93654	1.43636	1.31784	2.17044	4.31472	0.724122	1.09311	1.35558	3.61685	1.33186	1.97127	1.13758	0.539498	1.91107	1.84869	3.70178	3.2996	8.51703	5.35829
TNFAIP8L1	4.2288	5.81072	13.3146	12.0352	2.36095	0.589087	3.35439	6.35632	1.01026	0.695683	0.796269	4.69486	2.55611	2.27159	2.46855	1.09021	3.17446	2.19986	3.88356	7.22072	14.3218	12.8369
ORAI2	2.93458	3.21189	8.08486	7.58589	1.2693	1.81756	1.60697	3.30843	0.104733	1.26428	1.83212	2.30239	3.20954	3.06586	0.749428	7.95062	2.86367	2.93622	4.07005	3.83148	4.31805	3.75206
MIR7641-2	2.80812	2.10608	12.1417	5.83967	1.75586	1.98063	19.0449	19.3533	0.128991	0.210066	0.29039	14.6316	2.58534	8.67318	8.67318	8.98047	5.32639	2.02141	10.3548	8.84042	16.7024	8.09546
MTRNR2L7	7.26194	0.929073	45.8027	0	3.65941	1.04916	102.299	245.844	1.69382	0.398174	0	396.145	0	2.39537	47.1805	34.3883	20.8251	5.78301	0	2.55969	4.49368	31.0323
CYFIP2	0.15552	0.270509	0.235237	0.312397	0.82928	0.847405	0.19228	0.06062	0.0330116	0.230158	0.50363	0.202715	0.251943	0.411074	0.0909714	0.356808	0.398951	0.350626	0.25707	0.104472	0.193549	0.0250171
F5	0.282392	0.313869	0.266773	0.101265	0.0220338	0.0253313	0.106811	0	0.020385	0.308293	0.0476649	0.148571	0.157324	0.0238025	0	0	0.269651	0.287608	0.315967	0.454435	0.8419	0
SNORA57	0.719215	7.11634	2.91385	1.77589	4.9934	4.12532	48.1901	63.6557	0.376731	0.772185	1.66036	49.6126	5.5295	7.82779	5.23543	7.13781	0.746613	0.847532	9.29545	7.55792	0.060277	21.3029
TADA2B	3.41372	5.36353	3.29677	7.30037	0.842525	1.45787	1.74706	2.86979	1.92902	1.11793	0.777195	3.46471	1.40804	1.8776	2.32611	2.08448	4.48422	2.72455	4.46841	5.48866	13.7944	5.90967
PTPRD	0.476897	0.0260606	0.138075	0.42469	1.33753	0.0819144	0.556493	0.260691	0.100118	0.638765	0.134598	0.447376	0.0159875	0.527313	0.378245	1.09777	0.293194	0.0451671	0.0356053	0.0770568	0.00577798	0.083687
TAF3	0.881375	11.6591	6.67894	12.8776	0.830432	1.18802	1.78133	4.46564	0.966475	1.04618	0.615938	5.25967	1.10637	2.44061	0.595737	2.01834	4.93723	1.7889	9.38455	8.67477	4.92291	7.10866
DPEP1	0.609754	0.0063241	0.286905	0	0.998973	0.021421	0.738961	0	0.00570659	0.420755	0.00896446	0.396651	0	0.0535525	0.10604	1.12775	0.0162042	0.00677126	0.176691	0.0962668	0.518299	0.0496559
ZNF250	1.64417	6.17481	21.0452	14.245	1.72934	1.23984	2.46916	0.740206	0.967205	1.31036	0.829117	3.87324	1.71479	1.0988	1.45012	2.11489	7.27557	2.70874	2.36018	3.95901	15.898	10.4346
COL7A1	4.39483	7.54384	2.69721	4.54668	0.515691	4.67415	4.10965	1.64942	0.132471	3.10515	3.57784	2.36864	9.75681	6.50508	1.09391	3.25027	5.30726	3.9587	3.37351	8.50081	9.3409	6.99377
ZDHHC21	0.355218	5.5179	3.12173	3.18827	1.2965	1.83464	2.07025	2.96928	1.02244	1.48651	2.16789	2.93012	1.79599	1.87921	0.894776	1.00678	4.2965	1.81197	4.0082	5.86654	3.24849	6.67057
SNORD29	8.85047	7.48125	87.4134	5.6317	3.86599	3.09793	86.5433	116.235	0.390451	0.291516	0.114794	84.5141	7.82412	3.37585	11.135	7.9948	1.23479	0.361752	0.883612	13.6288	0.166904	40.8146
CYP3A5	0.12273	0.0418046	0.249348	0.116227	0.166496	0.00739752	0.254268	0	0.0332028	0.120838	0.0271472	0.38622	0.0511977	0.0235689	0	0.243293	0.435903	0.104873	0.090353	0	0.011664	0.295729
LMTK3	4.25668	10.3825	10.6558	16.9979	0.572089	1.29452	2.6851	3.47825	0.0621575	1.24675	0.719692	2.3887	1.23973	2.45873	1.53613	2.92894	3.55497	3.67414	7.84486	15.1709	9.51918	13.7154
HNRNPD	0.149374	4.90595	3.09139	5.76416	1.25217	1.83981	1.98661	1.10888	1.17903	2.03864	1.39977	1.52201	1.4737	4.48118	1.29644	1.13513	4.2022	2.42577	4.55672	4.32701	2.58151	4.93453
GK5	1.39593	7.12275	7.79605	11.156	0.939084	0.974689	2.4504	3.50949	0.538201	1.39669	1.58356	1.33373	1.44543	1.84224	0.746458	0.309482	4.68706	1.01751	3.81154	7.25877	4.51571	5.24822
NPR3	0.10103	0.509661	0.311189	0.0953587	1.23648	0.0922653	0.721194	0.328568	0.282811	0.451574	0.172909	0.56386	0.0925875	0.267301	0.373572	0.0750152	0.524226	0.46094	0.260491	0.244895	0.170395	0.292241
MIR26B	0	72.1893	4.43977	58.13	6.31549	5.48948	109.635	513.809	6.24665	9.13767	2.97706	100.291	0	6.52199	0	0	3.97514	3.14914	3.04589	274.268	3.80306	147.906
RGS8	0	0.514703	0.0498139	0	0	0.0203673	0	0	0	0.0127602	0.025275	0	0.123921	0.0368083	0	0	0.0283424	0	0.0217169	0.0877265	0	0.602429
DIO2-AS1	0.365784	0.590185	0.0218556	0.0540459	0	0.0315974	0	0	0.208644	0	0.0317668	0.077511	0.0493868	0	0	0	0.76198	0.0269382	0.136301	0	0.0421016	0
MYO6	3.44138	9.798	5.23409	3.02128	1.95657	1.54416	2.29168	3.70341	0.0897473	0.936125	0.922604	3.98556	1.39524	2.29168	0.715001	5.05489	2.90098	2.15102	5.23409	5.55444	2.52568	4.48584
SERPINA1	0.224771	0.13495	0.135164	0.0964266	0.0795741	0.468343	0.00554369	0	0.00204643	0.871016	1.27386	0.0649437	0.150138	0.350948	0.021961	0.0909135	0.0967397	0.522161	0.21667	0.293441	0.0841404	0.0471367
KCNQ1OT1	1.22637	0.426392	0.410183	0.42163	1.4478	0.318126	0.392258	0.224567	0.0772245	0.491544	0.566343	0.325984	0.177216	0.354752	0.210602	0.443339	0.417289	0.441676	0.223506	0.215937	0.356356	0.283092
USP2	0.147322	0.327974	0.453776	0.94414	1.01613	0.346268	0.426367	0.804117	1.57124	0.109325	0.0904984	0.466714	0.173134	0.0326095	0.233842	0.567079	0.151457	0.17777	0.2085	0.310244	0.143751	0.11371
ATP1A1	0.0409148	0.0954575	0.106229	0.215834	0.51616	1.27763	0.157072	0.163498	0.0239534	0.369291	0.676506	0.138991	0.365778	0.164666	0.0331059	0.100116	0.0348516	0.219579	0.20502	0.136218	0.217127	0.130255
ANKS4B	0	0.519606	0.0326262	0.263789	1.0133	0.0470509	0.15841	1.1394	0.0314197	0.0131134	0.0261219	0.167537	0.0172573	0.123109	0	0	0.408719	0.0354587	0.435261	0.120171	0.118283	0
SEMA5A	0	0.525195	0.760628	0.0803911	1.06053	0.0646896	0.408421	0.200498	0.15218	0.950078	0.275728	0.0578439	0.153158	0.257237	0.202707	0.844858	0.324064	0.198832	0.160221	0.0955674	0.327287	0.615402
MYH7	29.0542	1.91418	12.4702	20.1175	0.234866	7.06575	94.8164	70.0723	1242.57	0.0249645	0.0882745	10.8983	0.926782	0.0299574	11.3185	23.3143	1.2651	5.00878	0.208603	0.167761	2.71224	45.7531
C7	0.00160781	0.059687	0.0897709	0.105142	0.290898	0.114404	0.272283	0.546419	0.00707247	1.15626	0.542612	0.4287	0.178832	0.482718	0.992971	1.02152	0.418311	0.212059	0.24914	0.183319	0.22556	0.0884507
SNORA48	0.197779	0.192002	1.34377	11.5768	5.6237	4.5135	28.6647	5.85814	0.290578	1.67917	7.99089	6.10339	8.35191	7.19739	4.89035	1.4397	2.24702	1.32003	4.00555	5.77476	2.91143	11.4375
RAP1A	2.2111	2.65339	4.80503	1.92394	1.04602	1.50367	1.21079	2.74488	1.55293	1.24894	1.54482	2.18601	2.65339	0.98587	4.09127	0.919311	5.96278	0.989344	6.29588	6.31951	10.978	4.67809
TRIM56	1.40192	11.2399	5.41474	12.7936	1.30333	1.3709	1.66526	7.45507	0.342463	1.6376	1.23704	2.01402	2.5265	3.67488	4.39724	2.61083	2.93301	1.08677	1.66468	2.45554	6.34235	4.73808
HMGN5	0.531143	21.1019	3.0905	10.2533	2.52513	2.91655	1.73738	4.97262	0.644363	1.78378	0.797391	3.66184	1.78564	0.774612	1.07311	2.39229	1.29617	1.24892	17.5516	12.6437	4.17951	7.06449
SNORD88A	12.9494	13.538	2.8481	8.50633	9.74051	3.1519	130.861	399.608	0	0.626582	0.189873	144.93	22.5949	4.36709	54.6076	93.9494	18.9494	6.03797	0	13.5759	13.5	68.9241
BMI1	0.552168	13.6293	3.48265	19.4455	0.927008	1.38258	5.09254	0	4.20493	1.30473	0.424818	5.81674	1.70264	2.22069	17.7179	0.952478	3.46919	0.580041	24.4492	22.7869	34.3493	28.1995
MIRLET7I	19.216	28.223	3.22648	2.223	2.56098	7.77003	49.1429	73.331	5.55052	8.58885	3.90244	8.25436	9.70383	6.55052	28.6655	0	0	6.4669	5.60627	123.174	35.662	148.596
SNORD25	0	1.16271	12.4717	3.49909	5.52834	2.0457	52.6728	107.336	1.46984	0.789762	0.685558	46.6453	1.80439	4.35466	30.9872	41.2212	3.08227	3.7075	1.75503	16.5905	15.0932	12.7898
MPND	1.28098	2.95508	6.36713	2.95056	1.64433	1.07097	4.1232	12.9575	1.81187	1.11963	1.18969	2.80509	1.80719	3.33514	4.4113	0.866809	4.08039	0.577538	5.63677	5.91099	7.83339	7.13094
DNM3	0.0239736	0.225499	0.0142717	0.217942	0.171998	0.562078	0.354717	0	0.219031	0.287612	0.806032	0.362205	0.131081	0.461157	0.146864	0.457818	0.0710419	0.0321639	0.29169	0.296225	0.161312	0.30213
MME	0.0893017	0.100998	0.168005	0.175436	1.27989	0.0111845	0.326708	0.992893	0.221471	0.686708	0.00983791	0.197618	0.00726933	0.119863	0	1.72142	0.232207	0.0330424	0.00399002	0.123491	0.146721	0.0290773
ADGRF5	0.166853	0.362099	0.426191	0.376333	0.370303	0.116321	0.395113	0.138234	0.392103	1.2756	0.41765	0.174182	0.486399	0.21013	0	0.350125	0.497637	0.432684	0.242007	0.225326	0.236613	0.234378
ZFP36	0.0137768	0.54291	0.00820143	0.101589	0.143929	0.189704	0.436049	0	0.182573	0.533154	1.24183	0.100114	0.0753279	0.257921	0.327653	0.684496	0.168958	0.714939	0.145606	0.139424	0.382801	0.0228468
SUCLG2-AS1	15.5128	6.37971	2.49858	3.89871	1.5801	1.53701	2.54789	9.88676	1.61182	0.624387	1.24498	18.6982	0.146529	0.493028	0.819185	2.59133	6.1694	6.06666	1.49253	14.3288	10.9976	15.7486
SNORA80E	1.27863	8.45814	7.00749	4.05438	2.69676	1.45253	39.7608	21.8687	0.0870893	0.233617	0.228234	25.9614	7.37522	2.5567	3.08983	5.80807	4.80515	1.56052	4.87224	11.1847	2.53635	10.7976
DSE	1.15775	4.69286	0.769653	1.52542	0.8948	1.13466	1.55254	3.70327	0.75793	1.6943	1.88274	3.58049	3.61379	2.13584	2.71964	0.317039	5.29486	1.42488	5.44511	6.12285	8.72403	8.37606
EGFL7	0.476182	3.80349	2.52181	10.9076	1.66922	1.21989	5.15096	2.01974	0.614152	1.46189	1.77049	3.39645	2.82135	2.98404	3.13351	0.352755	2.92555	1.4986	3.20697	7.07002	2.34293	7.65157
METAP2	0.179309	7.93149	3.3743	2.68599	1.54934	3.75411	1.88901	3.62194	2.16121	2.20738	1.30807	3.4712	2.36517	2.33047	0.495764	5.01862	2.92601	2.79327	6.49532	7.03577	1.16759	3.59371
SNORD111B	0	1.72407	5.49866	1.54272	10.3904	3.01773	205.428	234.919	0	0.398979	0.19828	164.5	15.2966	4.54594	24.5191	22.6257	1.35895	6.40785	0.773778	4.06233	0.319183	17.838
CYR61	0.149209	0.050766	0.0146675	0.784062	0.12252	0.414111	0.31524	0.119209	0.0860884	0.394581	1.21756	0.0923134	0.729273	0.289976	0.364549	0.0651801	0.305547	0.415759	0.240034	0.122314	0.75696	0.0574979
SNORA1	1.96275	0.509693	58.9947	14.9094	6.6422	5.03462	141.54	75.928	0.452368	0.625588	0.879812	45.1333	7.88341	4.5162	9.51966	20.9634	3.00955	0	3.95666	19.8618	0	65.8127
FAM71F2	6.07819	7.16954	12.6816	31.9379	1.90555	5.6154	1.27402	0	0.717587	2.33163	3.23357	3.97099	5.10832	3.10954	2.38352	4.39453	1.8216	2.19959	2.31222	6.395	4.31776	9
SNORA75	3.5923	0.609287	25.6251	15.094	5.69762	5.31484	106.593	60.5062	1.00906	0.702152	2.68969	32.0623	10.8369	1.96263	24.3715	18.2016	0.261608	0	1.8222	17.1676	0.14949	42.4904
ZNF235	5.92127	3.23248	7.36493	6.76536	1.75826	1.88762	4.20222	26.7972	1.32819	1.73202	1.60451	8.10374	3.07657	2.86169	1.00185	1.17228	2.40568	3.6644	3.07965	4.23341	13.82	4.57209
TEAD2	0.57838	3.74091	2.697	14.3476	1.53035	2.18996	2.13548	1.79514	1.26281	2.5715	2.51248	4.76941	3.26111	1.32491	4.77071	4.54678	4.29999	1.38733	2.8311	15.0329	1.1639	16.4366
TPM2	0.0499035	2.52169	2.18109	2.13385	1.32039	1.95024	5.73671	2.9103	29.6047	6.50838	0.949217	2.62056	1.8309	3.72784	9.05244	1.99518	5.45924	1.50535	3.98457	4.18711	1.66324	5.81623
SNORD96A	3.97839	1.35897	5.74404	0.454673	2.54617	2.99579	40.8852	121.918	1.51305	1.09879	1.25793	64.3969	3.00589	10.8667	18.0783	17.8611	0.164187	3.04884	4.06427	1.80606	3.43531	2.85686
EEF1A2	51.3343	1.11213	12.6359	6.06603	1.40537	8.29809	38.4629	13.7199	522.469	0.811092	1.62686	6.36551	5.52634	0.890641	0	7.71785	4.46568	4.75425	1.82496	9.50693	0.528769	43.5744
ACOX1	2.10885	5.28623	9.66132	0.876902	2.11387	0.767063	3.31097	1.63222	0.96319	0.540081	0.607869	6.5519	0.702621	0.48482	1.19072	1.73653	4.60416	4.19692	3.14085	4.58828	25.7509	6.15224
WTIP	0.935805	1.58686	1.96085	10.1573	0.827694	1.2015	5.11239	4.35524	0.596812	2.309	1.29257	1.06792	2.53311	2.40392	4.21726	0.754031	5.39384	0.410274	5.00409	9.34064	19.5867	11.2156
SNORA47	0.139117	3.13882	4.28099	9.07826	6.98073	2.92666	30.103	10.2235	0.308088	0.597097	1.87176	17.0955	5.81392	3.30859	3.91602	4.49377	1.64493	2.37682	3.47482	6.47682	0.157047	10.8991
C11orf95	0.822707	3.50081	4.86362	8.9996	0.631546	0.828337	2.90553	2.64344	0.888733	1.72117	0.973014	2.3655	1.77481	1.03816	2.35224	0.692345	2.70987	2.78683	3.94771	6.75706	6.06873	6.63329
PABPN1	0.419348	7.93667	3.40205	9.32793	0.949587	1.23275	4.55121	2.99472	0.570462	1.72594	0.674892	3.29011	2.34891	2.66741	3.49658	0.454944	5.56381	1.8572	5.76679	6.699	7.93667	6.74601
SNORD50A	2.97242	1.39445	5.24987	2.24887	3.53802	2.68962	71.466	67.4857	0.777703	0.376066	0.672405	57.6523	2.23834	6.9512	12.8705	6.63079	0.473843	3.98629	2.42036	3.44626	0.509945	20.464
PCK1	0.00879113	0.11957	0.0182763	0.10399	3.62044	0.0291718	0.140783	0.507483	0.00947627	0.0203584	0.014597	0.558753	0.0331669	0.0742308	0	0.555581	0.0346662	0.00141477	0.00715836	0.125723	0.0627614	0
CA12	0.0606	0.184548	0.0215502	0.0822984	1.36571	0.719111	0.453889	0.170951	0.0031924	0.97244	0.282357	0.340796	0.246099	0.155835	0.0875532	0.111783	0.093654	0.0677937	0.211013	0.0703933	0.372467	0.0684606
KLF9	0.232427	0.0609648	0.137851	0.280971	0.606909	0.215345	0.469058	0	0.859765	0.72005	0.578186	0.16178	0.374006	0.182856	0.475392	0.660417	0.708542	0.795205	0.230658	0.454221	0.150881	0.233873
ZNF587B	1.1806	1.38076	8.03308	8.6323	2.57864	1.6435	0.729127	11.856	0.69219	1.67597	1.65353	3.6586	1.58175	2.04563	2.09176	6.15974	3.61023	1.26785	1.75152	3.59378	7.87125	7.79738
SNORA69	17.4569	3.29187	19.4963	1.99507	6.97167	0	185.553	386.656	0	0.698276	0.44335	303.506	19.7401	5.19828	57.7796	57.4581	1.27463	0	5.78571	18.6207	0	95.2648
RRP9	4.5531	4.55533	2.37772	6.57533	2.42057	2.4433	4.15365	6.69494	2.04161	1.79419	1.48081	4.18271	1.83965	0.937151	4.48267	4.76065	2.01255	4.09104	3.29661	8.65979	0.506769	1.35263
TCAP	135.049	0.516595	40.6529	54.6537	0	9.91019	8.50449	68.7774	1392.72	2.41429	0.534166	5.65092	1.15619	8.83834	24.5506	0	0	0	2.85006	0	30.3948	157.382
SNORD27	2.12951	2.81392	36.8801	8.42903	4.80158	2.3246	53.2761	59.4582	0.214361	0.244161	0.421372	33.4453	4.86416	2.10746	9.24118	11.4404	0.654607	0.036356	0.521699	14.7262	0.141252	17.8462
SLC13A3	0.0987045	0.206286	0.195695	0.00620282	2.45371	0.0123203	0.583094	0.746977	0.0128182	0.0065656	0.00999422	0.736692	0.0543743	0.0794701	0	0.66952	0.142124	0.0245694	0.00371316	0.0265967	0.111153	0.184171
VGF	13.8798	30.2016	7.96124	42.4671	0	1.41085	0	0	1.00194	0.72093	5.21124	7.90891	4.99806	0.313953	0	10.0465	0.447674	62.0911	0.343023	4.43992	10.1453	0
HMGCS2	0.448275	0.992193	0.0735624	0.232355	0.207807	0.095811	0.0549941	0	0.251885	0.140099	0.0340838	0.17067	0.0538231	0.0660765	0	0.516442	0.349787	0.199233	0.254478	0	0.823573	0.258159
SNORA7B	0.276736	11.7674	6.31177	9.79815	2.4261	1.99193	27.7726	17.7841	0.391569	0.769748	0.925158	13.8664	2.00329	2.27353	5.17033	3.7968	3.64991	2.50685	5.93886	10.9789	2.91262	14.243
SHMT1	0.392817	0.670656	0.195006	0.0622775	1.94274	0.323791	1.03058	0.335163	0.291403	0.307224	0.201054	0.97582	0.179382	0.358917	0.17695	0.102642	0.170748	0.616464	0.332074	0.169214	0.128456	0.161654
MIOX	0.0580557	0.0346833	0.0884745	0.0920435	1.93421	0.00986507	0.155407	0.137745	0.00490508	0.00115306	0.00818124	0.411203	0.00602154	0.028918	0	0.695844	0.00118967	0.0167468	0.00585681	0.00741253	0.107289	0.15731
SNORA71B	0.417381	0.436353	0.24847	11.216	6.57344	3.63403	78.4945	37.2876	0.222154	0.630355	1.05141	30.4663	8.03978	2.6328	7.71114	2.86659	3.64871	1.13586	2.64933	23.153	0.0807834	17.8244
SIRT7	0.613163	8.80411	1.972	5.01743	0.550451	1.62742	3.36608	4.81356	0.480647	1.55895	0.747008	1.88469	3.23999	2.22463	2.44401	10.2436	4.42754	1.78431	6.28786	11.296	0.301374	11.5572
LOC101928068	0.399479	14.8299	6.77592	38.1848	0.920794	1.58796	3.38855	13.1635	3.03885	1.36948	1.05024	15.3747	1.25994	1.18965	0	3.48109	0.584575	1.08715	13.8084	0.127693	1.04146	15.8322
PKDCC	0	7.40745	0.926919	17.2229	1.17738	1.78231	4.37015	5.07075	5.39003	5.77384	3.31574	5.92253	1.77013	6.46135	13.4433	0	2.99218	4.09961	9.88269	12.1551	7.39639	12.1941
TNNC2	7.1862	0.742586	0.272342	34.6056	3.28445	11.4511	2.38753	0	1664.93	0.849707	0.717168	0	1.70305	5.13819	4.3139	0	1.02038	6.27113	12.0847	2.04983	4.99657	185.485
DMGDH	0.271436	0.243125	0.0861835	0.0566598	1.92818	0.436337	0.321805	0.419586	0.232248	0.21436	0.241685	0.0609424	0.0893671	0.489245	0.257755	0.41625	0.0484356	0.324268	0.0197836	0.0636712	0.272043	0.981257
RNU6-14P	116.793	4.3377	38.5377	13.2197	0	0	21.423	358.672	10.7115	0	0.501639	27	12.541	4.78033	84.8656	261.148	3.39344	9.38361	0	33.3148	6.52131	107.115
EIF3J	0.248589	8.61886	1.66249	3.05241	1.42442	3.53126	2.55418	0.524496	4.4348	2.66074	2.42832	2.59356	2.9892	2.83427	2.13973	1.97122	2.7211	0.732595	7.76486	5.5737	5.51467	3.39438
ADORA2A	74.6391	1.15038	75.5323	45.7173	6.00902	8.93233	0	0	0	5.03459	1.69173	67.0737	20.1383	0	38.9233	0	2.28722	16.3353	4.33083	31.006	9.62256	303.253
TRPM3	0.154412	0.21291	0.154066	0.321584	1.70191	0.285868	0.850932	0	0.00813439	0.17828	0.110766	0.33738	0.0886286	0.429187	0.109917	1.20232	0.113582	0.15095	0.281415	0.283933	0.173371	0.154852
LIMD1	5.49359	5.70941	3.99714	12.7324	1.5039	1.45908	1.7573	2.79975	1.33207	1.23612	1.34025	0.892768	1.52175	3.11718	2.01773	0.788953	1.66304	1.29711	3.34832	1.89428	2.34838	6.00248
ARIH1	0.643121	3.36543	1.18407	3.32871	0.912588	1.36749	2.06413	1.89023	1.54387	1.34875	1.19161	2.43842	1.49632	2.56762	1.57704	1.55008	2.66751	1.22773	4.20133	3.81691	4.86778	4.45044
SOX6	0.194031	0.910134	0.0212128	0.170825	0.606168	0.820129	0.564888	0.304218	1.00156	0.39908	0.581222	0.0934875	0.25996	0.246055	0.108126	0.192198	0.123726	0.575105	0.993749	0.37915	0.413993	0.196894
SNORD94	0.919777	4.98615	7.48909	1.26874	3.99513	0.712287	39.5667	27.6502	0.231141	0.247682	0.90251	28.6413	4.03039	2.75919	7.86911	3.16546	2.49598	0.629145	2.88266	6.35936	1.80647	10.9651
ZNRF1	1.77919	4.04737	0.332228	3.0724	1.44828	0.718285	3.47092	4.37053	2.6497	1.57161	0.765881	1.44167	0.425531	1.45187	3.13775	3.91553	4.05926	1.81205	6.97188	7.94004	2.22247	12.7695
PDZK1IP1	0.0115317	0.0891257	0.0156574	0.0107877	2.70671	0.223634	0.610894	0.610572	0.0101283	0.0558156	0.245751	0.57782	0.109044	0.390354	0	0.119561	0.0484096	0.120474	0.0197832	0.192759	0.392028	0.0191237
EIF2B4	0.753797	9.79978	1.99222	4.20684	1.2041	1.45967	3.16053	3.18763	0.891237	1.34447	1.09575	2.11841	1.30821	2.26955	2.66387	2.79315	1.20269	1.77232	4.83941	5.22599	1.66884	3.69736
FREM1	0.963714	0.654182	0.0190863	0.137302	0.356225	0.444218	0.221992	0.237147	0.11576	0.401822	1.08329	0.383598	0.0752201	0.364058	0.424035	0.0554907	0.0789321	0.495076	0.37838	0.209906	0.384124	0.0165288
SNORD104	0.571768	0.942995	5.7565	0.95444	2.59659	1.23062	30.0614	47.7658	0.443382	0.216466	0.417008	48.2117	2.093	4.52836	5.9227	12.7366	4.16211	2.82401	3.58686	3.43459	0.884773	11.711
SNORD69	0	1.65169	4.5618	0	8.25843	3.58427	176.191	446.404	0	2.26966	0.191011	651.719	13.3708	3.37079	43.7191	84.4494	1.29213	7.59551	18.0787	33.9888	1.48315	12.7079
ACSM2A	0.150483	0.352222	0.525429	0.298856	3.69624	0.0651042	0.679977	0.0729259	0.00785749	0.123138	0.0354073	0.802302	0.0418487	0.260596	0.0405297	0.374148	0.27423	0.0388478	0.0642402	0.2378	0.152942	0.191806
SH3BP5	0.40065	6.78904	4.96362	4.24001	0.89246	0.644044	2.49555	1.68098	0.582236	1.67416	0.915893	3.14755	1.24457	4.19049	1.80994	0.890623	4.01295	0.44821	3.893	4.84478	7.77956	4.33117
ARL10	0.585231	5.0334	3.42609	5.0254	1.04044	0.870738	6.84122	3.93313	1.50247	1.60672	1.17698	3.05173	5.95656	3.09231	3.60349	3.01945	3.20752	2.38476	5.74036	10.6731	6.86669	4.02909
DEK	0.282673	7.02451	4.58723	8.00768	0.80395	1.65865	1.05563	0.886846	2.33858	1.54672	1.80287	1.6433	3.32666	2.57937	3.38683	0.184772	3.74906	1.87277	5.23772	5.55847	7.93869	6.08464
BAZ1A	0.889605	5.88613	1.329	2.80027	1.55652	2.26281	1.82476	1.4093	0.888214	1.88191	1.93191	2.11012	4.41245	2.48815	0.47864	2.79582	1.94508	0.742149	8.1315	4.01401	1.34663	4.00093
TEN1-CDK3	0	32.34	0	6.68552	7.53253	6.23238	29.5968	0	0.93416	6.37529	0.850503	35.9163	4.48606	13.9009	0	0	2.65259	0	2.82688	18.3939	6.19752	51.6193
PNPLA2	1.10426	2.97938	4.13513	9.32314	1.50636	2.02346	3.62293	4.99521	1.60225	1.20051	1.34157	8.17548	1.9169	2.51584	1.12242	0.877473	4.02346	2.76974	2.81172	3.44728	2.41706	6.08597
IQGAP2	0.779979	0.377601	0.44657	0.866564	0.906038	0.32472	0.189174	0.225373	0.0509125	0.733479	0.139347	0.564263	0.255547	0.425577	0.0403227	0.583491	0.414139	0.318152	0.70137	0.369998	0.476609	0.949365
BRSK1	7.47883	0.427135	0.493825	5.92034	1.43622	1.34016	2.82878	13.6183	0.212773	3.03996	2.24524	1.27664	1.70775	3.01138	9.00397	2.77241	5.73139	10.5982	11.2397	4.18957	4.65402	1.85145
PHF14	0.615864	3.80497	5.11125	3.79185	1.22693	1.53144	1.76926	1.54915	0.692082	1.57798	1.40817	3.68221	1.8567	1.84483	0.407069	0.856111	1.5298	2.83442	3.88401	4.69095	1.67352	3.97924
PHLDA1	0.0530331	0.636746	0.238837	0.0234033	0.322868	0.399734	0.325874	1.31493	0.110709	0.470158	0.488731	0.0857225	0.415435	0.389186	0.104429	0	0.273163	0.561383	0.208402	0.245627	0.175229	0.197988
CARD9	0	7.12425	36.2389	5.90039	2.85503	1.7016	2.30306	9.51105	0	1.94808	3.78196	2.25452	1.8729	3.79528	6.31627	14.3808	3.59543	10.004	18.4454	26.8934	11.8484	26.586
BHMT2	0.0835802	0.293552	0.132404	0.34662	2.12688	0.684393	0.95639	0.123657	0.159638	0.288961	0.511813	0.908432	0.132479	0.555688	0.255108	0.237106	0.275413	0.575547	0.314771	0.326563	0.658991	0.13718
PLCE1	0.545266	0.889742	0.0782216	0.885725	0.329452	0.0903128	0.639254	0	0.235579	1.08956	0.16903	0.230476	0.0588566	0.0722236	0.218308	0.28242	0.667949	0.15332	0.340573	0.32732	0.344114	0.187404
AOC1	0.23372	0.0661232	0.0378426	0.112688	0.514527	0.191444	0.118831	0.218073	0.0105183	0.0983445	0.0528522	0.712027	0.0402187	0.0588502	0	0.480625	0.00912744	1.7813	0.00927232	0.108341	0.250613	0.249049
CHTF8	1.20698	6.30007	8.51871	8.35921	1.6709	1.0192	1.48378	2.95101	0.779968	1.22496	1.12915	2.43855	1.25654	1.46143	1.54963	0.981289	3.44589	1.61192	3.14108	6.00752	3.39586	6.58428
CHD3	2.53653	2.60549	2.89254	2.83838	0.465314	1.24931	1.07206	1.89925	0.140935	1.63619	0.917668	1.93682	1.15852	2.79553	1.93682	2.04372	4.60309	2.0794	4.60309	3.70565	4.0991	3.41506
HMGB2	3.0371	5.43972	6.68247	2.96625	1.00516	2.41728	0.957108	1.20256	1.17838	1.6648	1.38493	1.31494	1.81838	1.68615	2.14704	2.66391	0.709617	1.1193	3.86097	4.63892	1.50282	3.05995
LOC100506178	0.5371	0.387366	0.108749	1.01428	0.0538965	0.173071	0.196122	0	0.028646	0.0554747	0.0609743	0.043758	0.0483012	0.0109993	0	0	0.789701	0.00875161	0.0153034	0.0193683	0.827433	0.234811
STX6	0.324996	1.61286	6.30475	2.15259	1.20695	0.852079	3.06684	7.81706	0.690936	1.26122	1.05131	13.5123	1.11709	0.840864	0.981685	0.331769	6.3828	15.2485	2.86829	3.60852	3.59685	2.2831
SNORA41	6.38333	1.17778	26.8556	1.63333	4.08333	2.71111	102.094	148.178	0	1.12222	0.694444	32.3778	4.78889	1.27778	28.9611	11.0111	1.75	1.01667	1.77778	42.9	0	68.3056
LDHB	0.0617386	0.0603044	0.101953	0.0194564	0.790633	0.934384	0.217902	0.432913	0.385914	0.384681	0.582684	0.355566	0.318294	0.155133	0.0751242	0.123852	0.379814	0.620767	0.343752	0.192185	0.526952	0.0852959
TEAD4	8.21546	1.94446	12.8582	1.40357	1.83143	3.8197	4.09601	4.78733	6.05024	2.09294	2.14848	9.0067	3.66648	2.72621	2.45995	15.417	3.88892	0.422272	1.85766	5.03656	3.28412	4.52219
SLC38A4	0	0.376697	0.0184382	0.137072	1.7735	0.0431655	0.0939778	0	0.580018	0.0672495	0.0237982	0	0	0.0489542	0.33732	0	0.385988	0.814998	0.0579589	0.0806851	0.238268	0.350898
APOE	0	0.138376	0.0424622	0.0841992	2.898	0.0578219	0.439075	0.722287	0.0622356	0.155257	0.0406729	0.81246	0.0752191	0.201189	0.229021	0.097488	0.109689	0.236384	0.154098	0.223539	0.998824	0.112294
INAFM1	0	1.35697	0.459604	32.9148	1.5158	2.74075	3.16214	4.96035	1.35052	3.93493	2.40473	3.36116	4.89136	5.2651	8.79601	1.40958	5.37528	3.99647	3.85402	20.2881	1.65477	25.4589
TNRC6C	0.314197	5.71711	4.98651	6.65334	0.880868	1.15787	1.44163	1.66634	1.53748	1.41842	0.827551	4.05696	0.392449	2.06974	1.32499	1.19363	3.76323	1.90774	3.34408	6.45882	1.03914	4.61662
PLIN4	19.9003	8.50799	6.78631	33.0605	2.14412	1.50221	3.99741	0	30.9906	0.133402	0.419213	78.7791	0.393752	1.81528	1.86943	0	0.586325	1.23863	3.38096	3.02199	11.0699	3.97589
ARHGAP30	7.72521	6.98805	8.97459	5.35427	0.561177	1.68512	0.399612	0	0.476623	3.41814	1.35511	1.36344	5.1546	6.95245	0.658963	14.5207	2.46423	0.630381	8.19482	5.49929	6.06047	5.41567
ANP32E	0.343915	8.01622	2.5948	3.34019	0.889721	1.80891	0.720733	3.08302	1.63432	1.83807	1.17343	2.22719	1.81035	1.34039	1.36131	2.49049	1.7471	1.6317	7.96676	5.48713	3.46789	5.07316
TENM1	0.0580911	0.29122	0.808777	0.391821	0.935719	0.135203	0.492157	0	0.149138	0.105805	0.188443	0.224397	0.165601	0.173332	0.153253	0.52476	0.142141	0.00934866	0.178889	0.227014	0.134909	0.181476
CRYL1	0	0.0144983	0.0771534	0.0171931	1.51547	0.366795	0.436188	0	0.139162	0.288241	0.296056	0.157056	0.248303	0.488441	0.217609	0.0853996	0.116363	0.104722	0.163981	0.429504	0.0741621	0
PPBP	0	0	166.048	0	9.73206	0	0	0	0	4.88038	1.39234	187.005	28.2488	36.1005	63.89	130.88	237.029	2.62679	2.54067	882.416	4.86603	195.273
FBL	0.0888291	3.29762	1.27539	2.5707	1.48313	2.77962	1.64685	2.11353	2.56836	2.8648	1.53575	1.22602	2.73208	3.6248	3.93805	0.369904	2.42561	0.0880476	7.06373	7.01645	8.01754	8.98645
RBP5	0.237789	0.165977	0.00528029	0.0526268	1.59236	0.133873	1.36869	0.660775	0.0210859	0.205474	0.155346	0.45861	0.360573	0.690063	0.125917	0.111555	0.00404822	0.152635	0.0566399	0.242964	0.252679	0.172841
RNU6ATAC	8.60569	6.23142	19.493	2.51919	3.76278	4.56825	49.5345	51.8835	0.451601	0.370717	1.53679	21.9532	9.00337	2.20577	17.3883	12.665	0.389253	0.807152	1.97154	16.689	0.372402	14.4832
C9orf114	2.86519	9.70992	1.94005	3.4907	1.35411	1.22485	2.97139	0.620286	0.746233	1.46595	0.596874	3.51058	0.59638	2.51281	2.62677	4.87618	2.13292	1.59909	6.6692	7.48158	2.37917	5.32913
ENAH	0.15834	2.68611	3.19528	4.28025	1.14101	1.4377	2.68611	4.92882	2.09391	2.3627	1.38803	2.15462	1.29537	3.21764	2.93687	0.609123	4.72233	0.412458	3.5752	5.0963	1.18222	3.38456
FGF1	0.709816	0.0213032	0.387734	0.698728	0.100933	0.0288266	0.272902	0.348295	0.166901	1.75252	0.140807	0.161595	0.218853	0.0118791	0.113881	0.195926	0.653865	0.018967	0.0463285	0.362392	0.465938	0.0923402
MIR1268A	0	1.18853	0	20.1249	4.51	5.87461	98.6799	0	3.03335	3.30147	1.90885	37.6687	6.76301	9.39217	16.7194	12.6816	3.04535	13.8221	33.2068	63.7803	0.528235	4.52601
SNORA60	0.938877	1.39483	6.53626	1.20806	3.17192	1.29112	38.3811	19.1757	0.112413	0.213954	0.549237	31.8557	3.80574	2.15063	5.77068	5.38713	1.81861	1.54921	3.18235	7.12138	0.490312	5.87701
ATG12	2.20711	4.4424	7.90656	3.58058	1.88664	1.50965	0.97595	0	2.1273	1.44256	1.4542	4.94347	1.50965	1.32215	1.19164	1.9951	4.16896	7.20435	3.11826	5.11137	11.081	6.86029
BASP1	6.6934	6.66055	0.45	16.4484	0.188588	1.14123	0.811544	5.17005	0.336609	2.16313	2.05409	2.5781	1.76616	2.42929	2.74908	0.392216	8.14828	3.82955	8.98536	11.516	4.08146	6.48681
MIR663A	0	9.73472	0	0	0.477243	1.30819	36.2809	0	0.884265	1.59818	0.179454	76.3719	3.88036	0.609883	0	0	52.7919	13.0494	29.3264	13.8921	92.948	67.8205
SNORD12C	9.22869	0.453099	19.0195	1.86369	3.07979	2.28473	95.2021	136.173	1.10496	0.763002	1.44051	64.8893	5.03966	1.00237	17.9252	9.42104	0	3.23367	0.683923	2.41297	2.90667	10.4939
PLCB2	1.85403	6.04847	3.56691	1.3365	0.198499	0.69105	0.607164	0	0.253547	1.61157	1.58011	3.56978	3.28115	8.92638	1.29854	4.04656	5.03478	4.38037	11.8404	7.96979	4.95591	8.92638
NOC2L	2.03682	4.21922	4.42952	2.97667	1.12489	1.53365	2.89526	1.46508	1.37374	1.42632	1.03004	1.17462	1.67683	1.75147	0.937849	1.25583	1.66049	1.34897	2.65343	3.67595	1.64329	5.89469
UGT2A3	0	0.080344	0.0351884	0.0388286	0	0.0381352	0	0	0	0.2757	0.484317	0	0	0.0260013	0	0	0	0	0.527393	0.0188943	0.0430755	0
PTPRB	0.59454	0.147459	0.170075	0.0536879	0.248318	0.0916572	0.510845	0.272619	0.5104	0.648975	0.65743	0.405186	1.03609	0.662961	0.133298	0.0944544	0.570176	0.135984	0.341358	0.133934	0.149954	0.374035
GPC2	68.7118	0	19.1741	0.713971	2.91538	3.80784	5.21595	71.2662	4.27986	1.41604	2.89952	33.7351	2.82415	4.12913	15.4337	0	11.3561	26.4645	0.702071	20.9312	10.9158	0
ARL6IP6	26.1782	4.52661	7.56934	3.04092	1.35024	1.70519	2.47978	6.69437	3.86751	3.86146	2.59708	5.14277	3.46479	1.0479	4.01324	7.5899	0.772776	2.08855	3.67945	2.26088	1.36354	27.6204
RPGR	3.45393	5.9412	9.92425	13.4557	0.24902	0.655759	1.16503	2.33392	0.143275	1.21433	0.466868	4.6802	0.667368	1.28974	1.21109	3.43118	8.17199	13.4557	4.76948	7.33711	13.8312	9.46086
TMEM255B	0.798547	11.6973	5.42555	1.44093	3.42031	1.40037	13.2848	11.0134	0.648471	2.783	2.13098	4.77252	6.01065	7.68329	2.3931	1.60673	3.95065	1.34359	8.56295	11.0539	1.69038	7.50837
RNF152	0.122392	0.0286653	0.0286344	0	2.60257	0.0641026	0.420888	0.501781	0.0492597	0.246701	0.0966332	0.318627	0.0638243	0.25706	0.484619	0	0.0885315	0.220324	0	0.11562	0.0068339	0.112249
PDCD7	0.754394	4.50033	0.470556	5.78221	0.542898	1.44257	2.59215	0.89635	1.1119	1.58983	0.979901	4.55239	1.92971	2.44857	1.13107	4.6504	2.48485	1.6722	4.89714	5.86628	4.32726	6.57163
SEMA3D	0.777059	0.338491	0.102286	0.0507068	0.281388	0.0351226	0	0	0.0211085	0.0598946	0.194047	0.0935053	0.0339015	0.286098	1.15096	0.115253	0.881962	0.130198	0.287203	0.354425	0.131128	0
CLEC11A	16.0281	0.630244	0.213462	12.9636	0.587598	0.889119	1.70355	5.1805	0.881973	3.96173	2.00784	0.546104	2.42646	1.88359	6.78239	3.70493	1.79622	5.78723	5.07031	4.51498	2.54011	12.66
CCDC88B	0.888243	6.12321	4.38664	1.33689	0.39751	0.628938	2.2722	1.00201	0.171241	1.2548	0.748499	7.40752	2.16603	7.85571	3.13637	1.17877	4.56756	4.72278	7.96314	5.88481	5.85585	2.96684
RNU2-2P	11.9121	3.82489	7.26891	9.83224	5.31544	2.27766	14.751	15.7152	0.113544	0.40157	2.5667	14.751	5.02088	1.24299	4.23863	4.94474	2.34848	2.21016	0.628828	6.4716	0.192648	7.56029
XPO1	0.754252	3.46707	1.22315	2.84689	1.66585	1.35437	2.41603	1.99352	1.80724	1.93073	2.20058	1.89692	2.73084	1.9901	1.7963	0.31477	1.67541	2.35886	1.39047	3.33015	2.32672	4.15683
ALB	0	0.00990515	0.163061	0	1.06228	0.0100453	0	0	0.0279867	0.0132224	0.00710181	0.0751297	0	0	0	0.741905	0.0107929	0	0	0.0527496	0.0103257	0
HECW2	0.947468	0.270991	0.372742	0.385924	0.255493	0.0273539	0.296997	0	0.211293	0.2628	0.13976	0.412435	0.706063	0.09059	0.262442	0	0.392157	0.160017	0.0109921	0.0482431	0.512564	0.663716
CCDC168	1.23984	0.472678	0.139648	0.366086	0.0466489	0.0136216	0.0291134	0	0.0192322	0.0109995	0.0231847	0.0393416	0.0888248	0.0430917	0.0229051	0.0499748	0.702722	0.0776229	0.0748561	0.1246	0.682603	0.303849
AK4	0.229849	0.12582	0.018162	0.134077	3.65778	0.119916	0.442321	2.06619	0.0471506	0.0694118	0.0960468	0.365358	0.00833569	0.24405	0.269743	0.406605	0.260093	0.334565	0.031558	0.194251	0.0774533	0.121074
SNORA70	1.18134	0.488814	3.10296	1.07723	5.51383	2.70026	42.2824	20.9468	0.475962	0.668531	2.74267	25.4657	7.98167	2.81014	4.60967	5.10256	2.31983	0.928789	6.40577	8.10377	0	10.7196
ACBD3	0.190738	8.48522	4.56411	5.21169	1.10795	1.47429	1.58257	1.81488	1.06707	1.24192	0.894458	2.82778	2.01409	1.49052	1.11816	2.28176	3.36797	0.937953	4.14038	6.36152	0.816131	5.58298
POLH	1.60972	8.00083	4.35143	9.4281	0.998757	0.871426	1.52051	6.60112	0.67903	0.784086	0.778077	3.14557	0.991401	1.0401	1.7212	0.969436	4.85371	1.7673	2.05833	4.17043	6.70327	6.8507
ZDHHC14	0.600196	5.74741	1.69285	15.3029	0.866502	1.44863	2.3492	9.65744	0.517703	0.938656	1.42393	0.347602	1.90485	1.97254	2.95592	3.77846	4.33741	3.55906	3.9219	6.97871	3.25586	11.1182
UPB1	0.0725715	0.264959	0.00947408	0.245631	1.9228	0.0173692	0.859678	0	0.0681502	0.0508442	0.0638553	0.537181	0.142301	0.0501495	0.150069	0.312518	0.103268	0.0302539	0.346183	0.013769	0.112299	0
BRSK2	18.0217	9.92495	6.86141	3.5239	0	0.592105	0.50872	6.1635	0.316724	0.709826	0.5872	2.23809	4.301	0.265571	5.76479	4.16436	0.118421	49.2078	0.365774	13.1903	15.0913	2.5436
PTPRO	0.303616	0.4371	0.492022	0.132091	0.0694591	0.044121	0.342744	0.551156	0.0522047	1.9044	0.0873249	0.349979	0.112867	0.128831	0	0.168061	0.705154	0.0229606	0.281844	0.714665	0.700535	0.0792072
TCF7	13.4288	6.93453	18.7985	7.77712	0.346421	1.25022	0.296232	0	0.496577	1.60969	2.43474	2.02222	4.41003	6.18334	1.81616	0	2.68853	0.757311	1.76638	0.934805	9.93195	4.01587
PDK4	0	0.0585669	0.0469157	0.0904101	0.79122	0.132072	0.442055	0.063266	1.11967	0.956867	0.659678	0.180257	0.79122	0.083147	0.0272785	0.291859	0.222927	0.39535	0.101935	0.170943	0	0.093201
ARPIN	1.28033	4.91245	1.68633	0.775959	1.61925	1.24479	1.70348	6.32482	1.83765	2.76579	1.5603	4.79668	2.15454	1.5364	3.87204	1.51662	1.50486	0.189359	2.11374	5.11582	2.06843	3.24038
CLCNKB	0.255315	0.198179	0.311192	0.06758	0.536719	1.14592	0.451173	0.150565	0	0.652713	0.0629986	0.224566	0.147264	0.195418	0.174272	0.177052	0.0755823	0.277262	1.0052	0.228067	0.412622	0.098229
TNNT1	1.29272	0.267573	2.6875	36.2643	0	10.383	30.3417	0	2528.94	0.0412154	0.312059	0.270844	3.74864	0.105982	0	15.7907	9.51159	1.73366	1.05263	0.142618	0.221778	110.136
BCL2L2	0.284646	1.84107	2.28643	7.35684	3.95329	2.29521	3.53434	1.05974	0.853939	3.39006	1.50958	1.79287	1.63486	2.73243	6.72251	0.493004	3.57783	0.416077	4.09509	2.87575	1.44215	6.65181
CCDC9	0.143742	0.641795	0.809825	0.330175	0.154904	0.359106	0.414771	0.285054	0.211002	0.372569	0.229902	0.418051	0.417041	0.478287	0.130062	0.0514395	0.612751	0.0990861	0.797035	0.682626	0.767206	0.464487
KHK	0.07169	0.134165	0.525558	0.535897	2.45451	0.0408154	0.702678	0.319122	0.0893586	0.108369	0.0496316	1.39048	0.0181402	0.162173	0	0.695241	0.0733226	0.205891	0.0116097	0.191452	0.511807	0.178137
TMCO4	0.283138	5.4047	0.849413	2.4537	1.15422	2.57824	2.33337	3.31105	0.274565	1.16375	1.39672	4.21087	1.39878	2.53871	0.514601	3.19127	3.32859	1.22629	7.03264	6.46359	0.518252	4.75206
FAM27E3	37.5124	36.3169	1.44951	73.8876	1.85267	3.29285	3.06447	0	0.624547	2.27214	0.722424	9.51036	0.990419	8.8392	0	32.8493	1.30968	0	11.5098	31.9544	29.0135	34.5109
RAB43	0.730297	1.73771	9.88665	19.1568	0.539619	0.898093	5.07585	0	0.48178	2.21822	1.19492	7.69322	6.15318	2.73432	8.29004	4.63538	1.03919	3.60699	12.0515	19.889	0.634322	20.8347
AKAP8	0.0290792	6.39213	4.37057	3.93085	1.21587	1.82649	1.89927	2.40351	0.895698	1.24141	0.915951	2.12261	0.887554	2.34164	1.62869	0.771877	3.05092	2.2249	3.83896	5.45064	1.31619	4.96554
RNY5	1.09131	0.579767	4.43193	0.0550702	1.27671	1.0448	56.7951	19.493	0.0819934	0.143183	0.206207	39.1105	3.80474	2.64062	3.46973	19.9798	5.05208	2.17986	6.5711	5.75912	3.13135	2.25696
PFKFB2	0	0.293494	0.443306	0.165244	2.06011	0.813479	0.601061	0.380194	0.223532	0.334858	0.356473	0.496477	0.288057	0.297759	0	0.598049	0.158901	0.303942	0.377315	0.140644	0.19131	0.196613
STON1-GTF2A1L	0.924119	14.187	0.203252	5.26965	1.79675	1.98916	15.8062	11.9187	0.363144	3.38753	0.50813	2.17886	1.271	5.40379	10.1152	2.68564	0.571816	0.247967	14.9661	8.25881	0.178862	30.3618
SNORD6	13.725	3.0851	12.388	0	3.67356	0.930288	88.2995	142.226	1.15962	1.08173	0.748558	188	2.80817	1.29808	22.5563	34.3861	0.497596	5.2226	0.765865	4.8851	0	21.2452
SNORD33	0.257765	1.43913	2.40064	2.53682	2.46615	2.27299	27.4617	21.0064	0.424448	0.312503	0.685802	12.1665	1.5522	5.96291	5.36886	2.19403	0.968692	0.683783	3.17596	9.17005	0.111496	13.5918
AVEN	0.284719	6.55504	2.61869	10.457	1.31079	2.22135	6.18987	0	2.44966	1.74447	1.11447	6.01055	2.77922	3.33419	3.85789	0.796851	4.68222	0.335516	4.07681	10.8141	7.27885	14.3805
SNORA51	2.68924	0.250996	1.5811	4.00398	7.03984	1.33865	76.0569	83.6551	0.457598	0.742743	0.674445	77.6756	3.36027	2.69778	7.59989	8.85145	0.28856	1.56232	3.56688	1.22083	0	16.8048
ITPR1	1.49339	0.518141	0.460043	0.148107	0.481068	0.805652	0.281779	0.0738271	0.142979	0.554005	0.595124	0.312355	0.412814	0.713058	0.81	0.614277	0.793776	0.236119	0.473128	0.29671	0.473976	0.124296
TNK2	4.32986	2.06524	1.64415	5.06558	0.620877	0.821468	4.25474	2.10285	1.62685	1.54927	0.824644	4.07321	1.54998	4.10502	2.50453	0.389989	2.87869	1.14315	3.22699	3.5402	3.21197	4.22913
SSBP3	0.842939	3.04849	3.88526	8.98129	0.972224	1.21627	3.17777	3.15522	1.3691	2.17023	1.30022	4.89974	0.982016	1.94687	1.16621	1.82506	4.53059	2.06273	3.50973	5.15468	5.25822	8.06816
TMEM52B	0.119019	0.0963762	0.467748	0.186438	0.450217	0.470454	0.157299	0.399337	0	0.587459	0.0742743	0.0275146	0.129604	0.313967	0.747344	0.148789	1.10293	0.103864	0.095474	0.112434	1.32256	0
WDR72	0.220774	0.0361067	0.177945	0.0818805	2.70416	0.454793	0.640517	0.160525	0.0134971	0.383412	0.23196	0.400963	0.223349	0.118119	0	1.14746	0.158795	0.0815899	0.165953	0.111291	0.0947965	0.0815239
KCNK5	0.0918471	0.16855	0.118949	0.0822917	2.46968	0.137336	0.517899	1.31253	0.00776009	0.380911	0.180104	0.485759	0.0430859	0.274267	0.570135	0.509589	0.109394	0.416005	0.0760373	0.199851	0.0965379	0.0675244
PLEKHH3	1.67707	0.443736	6.16173	3.4588	2.34489	1.11063	5.05461	2.84623	3.26023	2.64392	1.44361	8.002	0.984884	3.6459	3.25297	0	4.67855	3.99433	6.31065	5.89923	4.61134	1.72741
ADRA2C	0.457891	2.31974	3.54636	19.1585	3.21958	1.56376	4.44222	5.68478	0.795032	7.52311	7.70563	7.42349	6.46825	2.0894	3.68544	1.26289	2.15236	0.739639	16.7375	18.1443	1.57372	5.42136
PLEKHO1	0.0901176	1.9666	0.122359	2.70075	0.950331	1.18421	1.47293	3.21952	2.28782	2.35944	1.5242	3.36871	2.75057	5.37389	1.45734	0.261896	9.24525	2.76391	10.2611	5.0779	3.71094	4.63815
MRI1	1.44894	4.73609	1.84835	5.46704	1.04567	1.21451	3.57546	4.81378	0.440132	1.28187	1.06937	3.7818	2.06679	3.10087	1.55242	2.13341	2.76913	1.7812	2.46161	3.5575	2.05635	5.44595
CD82	4.74344	3.53721	7.41574	0.617453	0.574436	4.47078	1.13649	3.32299	0.999614	1.5117	0.88099	3.83203	1.09651	1.49605	0.967025	0.617019	2.21127	2.57866	5.62508	5.33048	4.2785	1.06675
IL1RL1	0	0.54048	0.276536	0.0731884	0.0876506	0.0186215	0.345375	0.422455	0.0586499	1.11721	0.0717384	0	0.0357929	0.0443404	0.0906651	0	0.184497	0	0.0446457	0.172516	0.00503695	0
A1CF	0.987393	0.227167	0.10956	0.0720285	1.69197	0.0235117	0.252028	0	0	0.037291	0.0514558	0.409768	0	0.222638	0	0	0.182023	0.0894214	0.00852779	0.0195127	0.416705	0.112355
PLCL1	0.0998771	0.263498	0.319972	0.382837	1.10225	0.858382	0.648314	0.168981	0.929566	0.327615	0.541555	0.52955	0.440055	0.296453	0.462255	0.58134	0.193803	0.0313817	0.698785	0.55378	0.444417	0.166411
MUC19	0.134009	0.629156	1.13825	0.741418	0.0139238	0.0229019	0.0891609	0	0	0.0188486	0.0321004	0.0988425	0.0622688	0.0364687	0.0301998	0.383042	0.618004	0.140173	0.110677	0.173796	0.47004	0
TEK	0	0.171948	0.0932086	0.0473011	0.284176	0.120507	0.214413	0	0.514	0.425341	0.73575	0.203141	0.599298	0.24167	0.117884	0	0.244375	0.54716	0.22466	0.153257	0.188098	0
MDN1	0.634356	0.852386	0.548281	0.473447	0.656053	0.583089	0.493364	0.134323	0.566827	0.513774	0.513774	0.371052	0.553322	0.689539	0.513109	0.778864	0.615948	0.593506	0.701263	0.613773	0.309368	0.528655
MALAT1	0.0247046	0.0861282	0.0660042	0.0861282	1.09034	1.09034	0.0861282	0.0471475	0.0660042	1.09034	1.09034	0.0471475	1.09034	0.277245	0.155737	0.0861282	0.0396026	0.0660042	0.155737	0.0861282	0.0396026	0.0660042
41522a	2.19768	8.87592	1.68932	2.65034	0.628933	2.2327	0.832231	0.746149	0.462741	1.23719	1.19605	1.60093	2.37149	3.30347	0.421827	0.387036	2.25816	0.423694	9.79774	6.92177	0.822675	7.21922
HNF1A-AS1	16.0757	4.67255	15.4754	17.344	5.4641	0.918679	6.60736	9.23177	0.0803545	1.14805	0.757371	6.14142	1.54323	2.30479	1.69404	2.18666	0.29923	0.095346	1.29796	4.11127	10.4257	11.6208
DPYS	0.143681	0.231825	0.116129	0.00598946	2.72334	0.0470173	1.00676	0.250426	0.0340068	0.0487808	0.012478	0.10628	0.0193992	0.292253	0	0.164644	0.0253221	0.061758	0.0389315	0.150435	0.238846	0
PCAT4	0.520068	0	0.500269	0.976558	0	0.132877	0	0	0	0.0316793	0.0824982	0	0	0.255634	0	0	0.0252994	0	0.0703984	0.089098	0.733464	0
UNC5C	0.0553686	0.995738	0.135451	0.614014	0.088657	0.0790179	0.036847	0	0.0320835	0.371356	0.197657	0.444097	0.144222	0.289032	0.808308	0.166526	0.267652	0.703456	0.424623	0.064195	0.918513	0.525973
TBC1D10B	4.09043	3.5313	3.7725	9.39316	0.871331	1.2884	2.64351	2.48706	0.940335	1.26885	0.762089	1.46695	1.23422	1.82803	1.23779	1.00449	4.10279	1.76644	3.08074	4.80721	1.69704	5.71128
BHLHE40	0.0380342	0.0515649	0.233064	0.0714186	0.328841	0.866709	0.211891	0	0.939302	0.428142	0.612231	0.136836	0.344769	0.491065	0.506495	0.134986	0.00678951	0.336531	0.305062	0.220611	1.04095	0.302005
GLYAT	0.172627	0.0215084	0	0.0179104	2.57845	0.042737	0.66928	0	0.0107142	0.13065	0.0304236	0.857259	0	0.138845	0	0.458354	0.311512	0.0127132	0.0127931	0.0915907	0.0398985	0
MTRNR2L1	1.15664	6.3551	10.2	0.628144	0.769309	1.17646	10.1339	10.5268	0.360546	0.263579	0.09536	15.0867	0.371797	2.43757	1.77782	3.36224	3.22081	1.7872	10.6385	18.8108	13.0951	15.3173
ZNF101	0.715568	3.13604	7.75536	12.613	1.49306	1.74039	2.67614	8.13813	0.722448	1.21313	1.18815	3.07991	2.11809	4.04571	0	0	4.35424	0.17346	4.55052	2.79636	9.17527	12.7111
SLC36A2	0	0.00549482	0.00964398	0.0716944	1.80967	0.0225774	0.548585	0	1.20101	0.00878424	0.0157369	1.27738	0	0.0213438	0	0.902235	0.0477713	0.0252687	0.030315	0.113074	0.0508365	0
NCL	1.0682	4.44504	2.05608	1.71194	1.45887	3.50434	0.846878	1.66662	0.866822	2.05608	1.04748	1.90054	2.10974	1.86496	1.0682	1.5215	1.96621	1.2479	5.52958	3.26233	2.05608	2.81312
SNORD110	0	0.0915191	3.97268	7.04012	2.44673	2.80845	37.61	27.2864	0.600789	0.742114	1.46182	15.2986	3.88925	6.4219	7.32277	5.50982	7.88745	0.298215	1.63489	15.275	0.0821804	8.46956
RYR2	0.521345	0.688346	0.59638	0.522071	0.0155657	0.021312	0.0230962	0.211065	0.0284735	0.0599493	0.0649574	0.126789	0.108578	0.114054	0.619045	0.798217	0.515992	0.157662	0.180094	0.495308	0.212899	0.491407
GJC2	23.0957	9.9	0.971223	56.6158	12.8655	2.84892	8.51439	0	5.76906	3.65827	0.168345	0	0	5.14101	92.6158	0	2.03957	76.8496	3.37986	14.8338	0	7.32302
CCDC85B	1.19649	0.136872	2.26399	10.992	1.41376	2.34922	0.906462	0	4.53027	3.18267	2.8326	1.03825	2.46294	3.61364	11.4545	14.8278	9.47651	0.046557	8.46447	9.16816	18.0142	0.923507
KALRN	0.316723	0.571648	0.616962	0.578642	0.378823	0.169619	0.584289	0.23459	0.594623	0.775151	0.370952	0.316931	0.402258	0.665095	0.763982	0.263934	0.66877	0.334448	0.512418	0.301127	0.420317	0.0897212
BHMT	0	0.00112703	0.0233229	0	3.85782	0.0645323	0.540271	0.146792	0.0203793	0.109759	0.0192523	0.703385	0.057147	0.219227	0.0315038	1.30807	0.264918	0.120605	0	0.0808146	0.0777252	0.163021
SNORA64	0.652136	2.18644	3.07586	3.91847	4.82983	2.00748	22.7911	7.98356	0.311791	0.578911	1.71314	8.87549	8.40502	1.26045	5.90664	0.979458	1.02952	0.512038	2.0996	6.9669	0.120351	8.07888
PLA2R1	1.00132	0.105727	0.932363	0.202961	0.53423	0.105576	0.582166	0.895945	0.151798	2.04886	0.260676	0.399444	0.439416	0.471273	0.661354	0.13713	0.35118	0.603362	0.440046	0.382054	0.519814	0.155579
SNORA38	23.3467	59.9605	302.584	92.7643	0	9.96096	0	0	0	1.76952	2.43415	0	0	17.564	0	0	1.78645	0	69.0621	256.682	4.22484	123.295
ZNF784	1.96205	0.707966	0.403133	16.1521	1.05252	3.14166	3.53784	10.9928	8.68822	3.24492	1.73665	2.35227	6.66064	3.76622	3.55174	7.46293	2.00673	6.13438	8.23941	2.27482	4.5566	4.87533
ZCRB1	0.210452	12.4032	6.78238	3.87131	0.986012	1.40862	1.34663	2.31348	2.75749	0.910821	0.799844	5.55258	1.16121	0.834458	1.93688	2.7969	0.575227	0.657981	6.93628	9.83201	2.69849	9.39268
C2CD3	0.1137	0.647859	0.627764	0.256541	0.291304	0.57562	0.203974	0	0.243318	0.409353	0.668281	0.061479	0.340964	0.508309	0	1.42387	0.344429	0.564341	0.222703	0.44733	0.347855	0.189442
COL5A1	2.70765	1.65513	2.85432	2.35094	0.379025	1.89262	1.38324	0.600295	0.366683	5.27475	2.43046	1.77697	3.28016	2.55524	3.31485	0.70686	2.95025	1.01659	2.09402	5.87265	3.15129	4.0182
TACC3	1.30973	1.92364	2.97285	9.15817	1.33562	1.98324	1.89656	0	1.15442	2.76695	2.37082	7.43782	1.61657	3.77769	0	0.595377	8.7105	3.1702	7.47012	8.98456	2.61686	13.9357
BAALC-AS1	0	0.149586	0.0943596	0.318921	0	0.351105	0	0	0	0.110086	0.096554	0	0	0.059249	1.18681	0	0.0237728	0.0669295	0	0	0	0
PTGER3	0.0234591	0.138193	0.200691	0.242292	0.920999	0.760225	0.266407	0	0.0245614	0.350338	0.35646	0.194048	0.317361	0.168861	0.245152	0.037341	0.216554	0.149468	0.372159	0.313399	0.804954	0.0168459
DENND6A	0.132309	1.26805	0.932841	6.58102	1.30213	1.54441	3.75969	3.18797	0.974526	1.96966	1.61891	1.08392	1.0161	4.19381	2.00248	2.17452	3.29218	1.71806	3.10333	2.96895	5.39461	6.324
MAGT1	0.195883	6.95877	8.5184	5.69236	2.11457	1.26563	2.01051	4.5572	0.785443	0.864165	1.14762	2.21715	2.035	1.82758	2.26947	1.10656	2.96862	1.85816	4.37024	3.29299	13.5889	5.31015
SLC47A1	0.119144	0.214273	0.0956296	0.268985	2.5183	0.0862436	2.14189	0.600131	0.398585	0.148972	0.088682	0.851547	0.0861434	0.234381	0.527917	0.206357	0.0806655	0.320458	0.0270889	0	0.0919219	0.328741
CCDC80	0.139658	0.585215	1.69267	1.126	0.565306	1.57274	0.689131	2.92235	2.0033	2.81501	0.787908	0.769653	2.32887	5.23752	10.9669	0.876227	12.641	1.4143	2.06627	2.9077	3.19269	5.03878
RASSF4	0.336438	0.0407614	0.0262251	0.00667927	2.3398	0.361426	1.39816	0.165058	0.149881	0.252679	0.207236	1.08416	0.274491	0.698103	0.239335	0.145811	0.287596	0.0994734	0.288968	0.102902	0.03362	0.279858
KLF6	0.0174884	0.817815	0.785593	0.290104	0.570877	0.334395	1.05828	0.500299	0.253239	0.44377	0.747146	0.170851	0.561486	0.57867	0.330134	0.187959	0.648456	1.31534	0.160425	0.30951	0.352888	0.375719
SNORA33	0	2.10455	0.857581	15.856	2.0356	3.82103	44.1785	26.6796	0.497738	0.307311	0.518094	7.37086	6.72603	5.04764	5.5073	3.07573	0.0755144	0	8.6349	30.5446	0	30.6332
MGAM	2.04404	0.435901	0.736031	0.282816	0.455257	0.162764	0.129814	0	0.0126429	0.147436	0.0333975	0.01158	0	0.264942	0	0.152191	0.724479	0	0.170204	0.170484	0.182623	0.453215
CXXC1	0.737665	3.88528	1.80402	1.19029	1.20927	1.54303	2.98114	1.10879	0.527812	1.26279	0.79925	3.56089	0.656821	2.61057	1.36118	1.5826	2.40114	1.31675	4.17912	5.22839	0.949335	3.99685
CEBPD	0	0.0130167	0	0.0810396	0.264369	0.48339	0.257487	0	0.0736641	0.650946	0.845229	0.0167045	0.585442	0.323027	1.1223	0.302817	0.432108	0.676377	0.131591	0.220682	0.227291	0.0896383
RASAL2-AS1	0	14.8374	1.97208	0	1.69309	1.03928	3.9974	25.8862	1.75698	2.80904	1.15854	21.9442	0	0.998817	11.102	5.33909	2.72172	1.02011	1.72717	2.4044	2.12541	13.1465
PHF23	0.543772	3.31864	0.0254385	5.16224	1.83246	1.90522	3.83362	2.78137	0.94645	1.75516	1.29608	2.42287	1.16889	2.78985	3.55005	4.59973	2.68337	1.47109	4.59973	8.23073	1.86845	7.05514
MIR455	0	111.878	0	545.634	58.1707	15.7317	96.2195	0	0	29.3415	11.122	0	0	16.8293	0	0	4.7561	0	12.9512	122.927	24.8049	265.61
PSMG1	3.57624	2.33764	1.76152	3.18633	1.646	1.83804	4.06199	0	2.37772	1.43064	2.11645	5.08341	1.87558	5.86141	8.0285	1.60628	1.76188	2.93416	5.33339	10.9995	3.72965	7.30334
SNORD18A	0	0.31677	3.45093	1.66957	5.37019	0.801242	103.975	160.934	0	0.234783	0.30559	87.3205	7.00621	4.33043	33.8981	11.8099	0.428571	4.49814	0.659627	2.6646	0	8.69068
KL	0.554776	0.00730162	0.30775	0.0214378	1.97247	0.114023	0.156628	0.704988	0.0556841	0.060601	0.0728441	0.769965	0.0528815	0.185466	0	0.655278	0.146573	0.315002	0.0780561	0.280264	0.144115	0.272569
CHIC1	0.498984	5.1647	3.3174	2.94676	1.13059	1.15543	1.33596	3.83038	0.722002	1.22048	1.52078	3.09791	0.376192	1.3758	3.90035	0.478687	2.70949	1.68291	3.64102	6.04429	2.82043	4.13257
SNORD20	12.75	0.625984	21.3986	1.32283	3.12992	1.29921	46.3022	106.624	1.52657	0.693898	0.448819	43.9931	2.76969	4.66535	12.3366	18.2421	0.930118	0.540354	1.54134	3.33366	0	0
TIFA	0.593148	1.91071	0.0336244	0.0243487	0.042486	0.228745	0.200421	0	0.111474	0.110812	0.177895	0.482668	0.265186	0.0248456	0	0	0.0349495	0.794563	0.067166	0.437035	0.018303	0
SKI	2.05425	2.46566	1.05973	2.28126	0.896285	1.09006	1.84019	1.2018	0.704593	1.74721	1.22768	1.86006	0.963994	1.81108	3.59622	2.00647	2.65838	1.06407	2.46566	2.69957	3.98533	2.37365
HAO2	0.198913	0.0227547	0.0743969	0.0189482	2.69343	0.0357393	0.269462	0	0.0287606	0.00854359	0.0210629	0.359719	0	0.195445	0.100493	1.73536	0.228435	0.0202593	0.022078	0.41889	0	0.098632
APOBEC3F	23.6534	4.40093	0.666372	1.07665	0.36103	0.492108	2.19156	0	0.195858	1.16227	1.18386	5.28476	1.70211	3.20798	2.36242	2.50865	8.4325	1.97525	11.9163	1.99912	14.9511	13.8703
LOC100506314	0	0.112727	0.0407905	0.10087	0.209644	0.372016	0.207905	0	0	0.165375	0.19336	0.254229	0.253439	0	0.924427	0	0.319526	0.0289328	0.0279842	0.714783	0.0535968	0.368696
SYNE2	0.0190204	0.175508	0.166536	0.152723	1.54847	0.877821	0.405275	0.0998306	0.127151	0.657247	1.54847	0.296905	0.70894	0.585285	0.0482178	0.563693	0.101369	0.386209	0.377486	0.15022	0.257256	0.0964147
PTGIR	0	3.36373	20.7104	13.8125	2.82102	3.05121	5.55657	0	0.314088	8.72314	5.1675	9.24854	1.80325	5.94459	4.31385	4.90637	1.72774	3.73602	7.94605	1.58617	0.71312	10.5091
CMKLR1	14.4963	4.61756	5.46292	15.3646	0.829802	0.50248	1.48445	5.0567	0.461903	1.50721	0.647317	3.08645	1.07856	2.43	2.06887	1.58882	2.66783	2.297	4.06188	2.45739	3.47937	7.55207
CERS2	0.932705	4.66653	6.70968	4.09909	2.15448	1.02101	3.32526	3.37415	0.204761	0.614078	0.73771	2.82432	0.826768	1.12548	0.724505	0.386346	2.92166	1.25294	2.57581	3.31098	15.9776	5.02673
CKM	8.62402	0.453541	1.10097	25.4084	0	7.55508	49.6593	0	1061.31	0.0876733	0.116336	2.69258	1.58486	0.48136	0	7.88807	0.641532	0	0.440052	0.602754	0.418977	93.2979
HSD11B2	0.250886	0.0587117	0.0182783	0.00251921	0.282222	0.520567	0.366713	0	0.0179004	0.624961	0.0580119	0.157101	0.168591	0.279157	0	0	0.0139676	1.01855	0.123819	0.0965978	0.0315601	0.086395
LOC100130691	0.140661	0.445427	0.332077	0.114124	0.304588	0.343144	0.212003	0	0.267756	0.417819	0.312799	0.346774	0.140304	0.00963922	0.141375	0.472857	0.0334398	0.0544438	0.124298	0.179992	0.020171	0.138757
FBRS	3.04968	3.32431	1.46757	4.70185	0.803677	1.1192	2.06324	0.966123	0.681736	1.22877	1.17952	1.24373	1.25891	2.68447	1.60454	2.55583	3.95603	1.10425	2.7688	3.31819	3.30431	2.60566
MYO10	3.99175	5.15283	3.67429	6.03084	0.622458	1.53303	1.12492	2.01903	0.327311	1.30728	0.798001	1.90986	0.923925	1.06983	0.354044	2.26568	1.63257	1.26163	3.99175	4.61151	2.09736	3.64339
NBPF12	5.6742	2.16038	8.28097	4.42342	1.53298	1.35024	1.99917	3.87446	0.634482	1.18918	0.807983	1.95537	1.55637	1.69374	1.02454	0.987294	2.2532	0.747566	2.37627	3.13173	0.389986	5.21226
RASAL3	16.5485	4.74711	2.36204	0.68374	0.476431	0.822237	1.19574	8.225	0.408786	1.47653	0.972981	2.47983	4.20245	6.68345	4.47215	2.65857	1.92118	1.38906	7.28526	2.66848	0.29099	4.72437
RNU1-13P	10.3825	1.91566	11.8012	2.65663	7.18373	7.08434	6.56024	68.006	0	4.95181	0.975904	0	0	2.07831	75.7861	25.6627	9.01807	1.65361	10.5723	0	35.6837	10.2199
CYP2C8	0.399246	0	0.976697	0	0.342268	0.122037	0	0	0.0541487	0.0571794	0.0573815	0.0836476	0.0858702	0.0947602	0	0.94639	0.113551	0.0369747	0	0.0440463	0.0684941	0
PCLO	2.28425	0.519742	0.502019	0.640708	0.898582	0.647596	0.510999	0.0433786	0.0130551	0.247568	0.400247	0.250433	0.0903539	0.30165	0.0917891	0.035609	0.497742	0.389947	0.350643	0.367998	0.361519	0.216253
SLC7A8	0.131402	0.722129	0.612376	0.641821	0.907445	0.136281	1.23805	0.339385	0.121558	0.271606	0.0600313	0.768369	0.0494152	0.148319	0.37306	0.928076	0.556353	0.0639173	0.135398	0.300769	0.332961	0.150722
ZNF316	0.560365	3.49347	3.78976	6.39443	0.849971	1.2331	3.30282	2.26416	0.36934	1.31219	0.677499	2.36073	1.38641	3.21686	2.08614	0.226028	2.9991	2.3467	4.63231	4.03373	4.81387	5.40524
GLRX5	2.52658	4.60998	0.63547	1.9583	1.14093	2.69046	1.54607	2.95466	4.09705	2.06318	1.64421	7.72888	3.64494	2.44155	7.47087	8.72633	4.18572	0.554989	9.45666	9.80881	35.9419	3.41788
LZTS3	0.053076	2.15847	0.817665	7.44006	1.50146	2.03929	4.33195	2.37844	0.410565	1.01348	1.10411	3.78063	1.52673	2.72674	0.781773	0.651139	2.86735	1.3766	3.70617	5.69991	10.3584	6.55444
PRDM2	1.72938	3.17246	0.876264	2.05816	1.0214	2.03539	1.39845	2.06003	1.37285	1.70017	1.54288	1.92538	1.41279	2.7511	1.6981	0.71323	2.86534	0.678309	4.52709	1.94445	1.49831	2.53618
GRID2	0.210022	0.019602	0.966367	0.450447	0	0.0152016	0	0	0	0.0293364	0.089876	0.122013	0	0.0216022	0	0	0.503786	0.0244025	0.278562	0	0.781681	0
PPP4C	0.0783138	2.38536	0.732728	3.54961	1.63196	1.73818	3.47428	3.88606	1.34695	1.6888	1.27266	5.35336	2.60445	2.80965	5.89593	1.19618	2.89359	3.49748	4.01628	5.56924	7.42948	4.03063
SURF6	2.13119	3.05847	3.2952	5.8734	2.06331	1.5684	2.22145	1.24898	1.24843	1.62626	1.34545	1.4407	0.963866	2.04161	1.25697	0.7593	4.62147	0.983788	3.95815	5.0068	2.36503	6.46435
STK11	0.287165	3.79976	1.60673	1.38252	0.890743	1.70846	2.9009	3.83768	1.66859	1.13089	0.7834	4.37916	0.746764	2.71283	1.30308	0.485244	2.43355	1.64306	5.03635	4.77672	5.16812	3.85417
LINC01578	0.415044	1.28194	2.11308	1.8504	1.64917	1.57608	3.68601	4.89192	1.24838	2.08046	2.51554	3.48656	3.32088	2.78723	2.58852	1.41291	1.59044	1.45328	4.54892	4.82229	2.06505	4.78989
CA3	2.66233	0	0.250325	13.0767	2.90217	4.31287	14.5466	0	501.745	0.229362	0.382887	0.564157	1.15914	0.489553	3.72652	0	0.142427	2.39597	0.109132	0.134411	12.7167	68.9973
EXOC3L2	1.59368	3.01113	2.38117	5.20116	0.956164	0.375612	2.81353	5.93502	0.183578	1.47441	1.1255	7.18091	1.43502	1.8498	1.38763	1.57343	4.14397	2.33912	2.69826	2.87606	6.86894	8.62439
FUT7	427.566	2.78526	17.5453	3.41053	0	3.14526	0	307.459	6.87789	2.72842	2.04632	0	0	32.8358	0	0	4.37684	117.057	22.1684	99.9853	6.42316	0
YY1AP1	0.296697	1.651	2.87736	1.64297	0.939415	1.04865	2.8198	3.8035	1.55415	0.912596	1.12625	4.69452	1.28978	1.84401	0.786867	2.31762	4.29655	4.2317	1.53268	3.37407	0.390563	3.99388
SIX5	6.22195	0.467964	2.19443	5.10967	1.0034	1.30505	3.31922	4.16553	1.17442	2.57647	1.05241	1.01631	1.13341	2.29101	2.8488	1.06307	0.991501	7.3853	3.23617	5.41235	1.20211	3.32271
TPCN1	0.275797	0.2633	0.699409	0.430144	1.49719	0.43057	0.970034	0.559309	0.377472	0.661446	0.484011	1.15721	0.435008	0.95813	0.419009	0.0915457	0.298198	0.566149	0.469988	0.447694	0.288045	0.38791
CCT6P3	0	1.80953	1.89491	1.88101	2.16892	2.95058	7.01375	5.82174	2.00809	2.73879	1.98228	12.9632	0.620827	3.47014	0	5.12016	2.18084	0.210472	7.65774	14.4299	0.328945	6.51405
DST	0.705415	0.270739	0.281954	0.187955	0.553379	1.01077	0.201816	0.153855	0.695256	0.99195	0.966717	0.272158	0.548416	0.816733	0.650183	0.325018	0.284382	0.57844	0.375016	0.187354	0.231181	0.165127
ITGA6	0.485306	0.0472609	0.131225	0.56865	1.36129	0.720003	0.425879	0	0.443014	0.498769	0.382157	0.447703	0.451065	0.482076	0.339379	0.282578	0.214392	0.316405	0.232707	0.310271	0.358932	0.238929
LRP1B	0.594909	1.18631	0.677551	0.306865	0.11073	0.300841	0.0389944	0.816431	1.0048	0.043918	0.0916794	0.00860079	0.0959383	0.0164952	0.19518	0.484179	0.70003	0.471091	0.195865	0.406896	0.583441	0.0234964
ERICH6B	1.47801	0.908827	0.517595	0.760574	0	0.00260776	0	0	0	0.0061534	0.0417242	0	0.0515376	0.0130617	0	0.094131	0.409327	0.0424562	0.06007	0.00926441	0.234127	0
C9orf91	6.27412	8.48121	0.412132	4.20589	2.83001	1.35536	4.15603	26.0968	2.18878	2.30649	2.67097	5.8784	1.6561	1.65452	2.4548	11.9976	0.177349	3.02756	2.10042	2.88808	6.50859	0.735905
TPBG	6.1267	1.58041	0.777309	7.15189	1.08546	1.19243	3.16706	7.51652	0.977948	2.05472	2.45763	0.867175	2.33274	2.68542	4.40375	1.03089	1.17234	0.410782	2.40197	8.49582	7.37425	7.58466
PDDC1	1.22468	3.91975	6.45529	11.0585	1.81072	1.01309	3.29762	5.36501	0.367552	1.12064	0.876408	4.57404	1.21113	1.5902	1.38915	0.366074	1.01716	0.789248	2.01571	3.86721	5.83266	5.25377
SLC24A2	0.0312139	1.47108	0.00686523	0.609999	0	0.0386741	0	0	0	0.0398641	0.0775314	0	0.14655	0.0137305	0	0.343994	0.0456767	0.238635	0.145314	0.488942	0.180739	0.282527
LOC101927087	0	0.877174	0.253436	0	0	0.199246	0.513715	0	0.123708	0.133287	0.0974334	0.113307	0	0.156277	1.36297	0	0.0462535	0	0.142866	0.0596643	0.0604853	0
LINC00324	8.35855	0.152332	9.22176	7.72746	1.69326	1.79482	31.3534	25.9772	0.785492	0.567876	1.64767	33.4415	5.53679	2.76788	5.62694	0	0.788601	0.496373	10.9223	0.740933	23.1834	0
SNORA46	0	0	3.09354	0.601336	7.21938	1.2461	63.1871	87.2806	0.895323	2.12138	0.815145	49.7739	4.29955	1.26615	24.431	13.7472	0.384187	1.06236	0.591314	12.4911	0.44098	3.7784
TRIM41	2.79365	3.17536	2.07741	3.79929	0.907546	1.65087	1.88247	1.25016	1.09752	2.01951	1.30361	1.68202	0.83754	2.17034	2.08646	0.611347	1.1	0.739253	2.97778	4.14822	2.54856	2.67684
NBPF9	9.54972	5.79373	13.1603	7.68131	0.926542	0.827313	1.43101	3.66376	0.514712	1.02192	0.994825	2.27953	0.849533	1.13352	0.673397	1.11435	1.16295	1.5138	4.57275	7.27668	0.40067	5.07752
ZNF793	1.06365	2.52397	3.36039	8.23234	1.50027	1.92487	1.42631	9.85513	0.633257	1.32607	1.30483	2.90876	1.32547	2.25056	0.926123	1.76819	2.8648	0.990875	1.40017	6.42049	4.03375	4.86824
MBD2	0.0843621	2.61747	1.22071	6.62516	1.10572	1.4824	1.87148	3.86448	0.651554	1.3711	1.26671	2.79086	2.02226	1.98716	1.99754	0.694645	2.53231	1.60007	3.13892	4.01641	5.67504	3.73466
TGFBR3	0.268769	0.373396	0	0.23189	1.01506	0.133455	0.359635	0.350782	0.353443	1.03923	0.419494	0.718284	0.361538	0.56116	0.716403	1.06991	0.410389	0.354314	0.455638	0.103687	0.0517172	0.112608
SNHG12	0	4.58005	0.405074	0.83902	2.46019	3.12336	14.9786	8.88583	1.07743	1.81015	2.04593	4.50744	2.68504	9.43088	0	1.38626	1.65267	1.89676	6.40245	15.2362	2.00744	9.80184
MIR1254-1	12.2682	0	0	15.0413	2.62226	5.46498	17.9497	0	0	3.11345	0.746455	68.2174	10.3962	1.81392	52.5496	0	4.94284	3.53889	3.13666	6.49764	1.31113	72.5995
SNORD47	0	0.0901105	7.06985	1.43582	3.43398	3.38084	42.516	38.2698	0.350666	0.56064	1.38056	17.6034	3.03485	4.43794	3.93086	3.47861	1.83536	0.788892	0.497308	8.32502	0.0561065	16.4741
SNORD43	10.469	2.71861	0.997046	0	4.88552	2.47932	77.5369	190.609	0	0.418759	3.9616	80.4549	4.73264	1.5288	19.1167	34.4579	0	20.26	1.17651	7.50443	0	0
ALS2CL	0.212236	0.226705	0.8524	0.216193	0.422426	0.408459	1.41807	1.52105	0.132269	0.817262	0.260937	0.583107	0.222062	0.652525	0.217125	0.119822	0.521971	0.484787	0.395669	0.376519	0.0718195	0.672851
ACSF2	0.41855	0.252594	0.296314	0.174113	2.09156	0.084811	0.946748	0.130499	0.195095	0.0838445	0.0588903	0.932744	0.158235	0.324097	0.0458651	1.16288	0.0776678	0.0218776	0.166876	0.212717	0.0934984	0.130688
ESM1	0	0.18995	0.127453	0	0.118642	0	0.148764	0	0	0.39322	0.0729475	0	1.37453	0.186672	0	0	0	0.065161	0.88705	0.766154	0	0
ARHGAP24	0.272289	0.192988	0.111828	0.177197	0.591265	1.04594	0.470306	0.926715	0.233944	0.502553	0.800516	0.652201	0.525634	0.480015	0.14418	0.167699	0.178372	0.838441	0.715975	0.29006	0.273849	0.019821
EHHADH	0	0.0382492	0.0291513	0.376637	2.76314	0.183187	0.509549	0	0.100172	0.138547	0.232203	0.737628	0.155421	0.237492	0	0.0623951	0.00204626	0.005761	0.0657635	0.358882	0.0866353	0
THOC6	1.29658	6.98	0.962169	5.05263	0.79179	1.78098	3.21596	10.1645	1.03495	0.930188	1.23152	8.63443	3.00588	1.80992	1.37295	1.21526	3.65597	2.76658	2.75004	9.60239	0.758707	18.2297
ATAD2	0.66865	5.37478	4.18758	1.14453	0.757056	2.00765	2.25283	0.995673	0.584545	1.85166	1.64723	2.10862	2.87699	2.34135	5.04844	1.62493	2.26166	0.39098	8.07666	3.41683	1.06801	3.16225
SNORA79	16.825	10.3453	54.3321	7.42479	6.25828	2.34153	178.697	0	2.28193	0.280984	1.9158	49.6235	16.7569	3.22706	0	29.7332	1.43898	1.55818	0	51.8969	0	0
ANP32A	0.0904665	3.66144	0.912893	2.83278	1.72082	2.20055	1.32807	1.27323	1.79012	2.33162	0.953687	2.39862	1.79069	2.37126	2.24394	2.35255	2.21528	2.73236	5.39845	4.13337	3.89875	3.04425
GPR6	214.367	191.286	355.355	317.323	0	0	0	0	0	6.75	0.362903	115.911	0	0	0	215.673	4.17339	11.5403	0	7.91129	0	0
SNORA6	0.97712	0.274942	2.01375	6.18382	2.44257	1.66187	30.2636	20.3742	0.186689	0.413884	1.03188	16.8036	3.69328	1.30366	5.31442	4.2142	0.647868	0.0719602	3.57108	9.24982	0.0298703	10.1342
SLC22A6	0.0412866	0.41435	0.171014	0.0111425	3.27135	0.00289914	0.735893	0.174542	0.00902925	0.00817348	0.00337069	1.74692	0	0.013867	0.0729675	0.298734	0.0352962	0.0532324	0.00558871	0.147175	0.272904	0
TSHZ2	4.49447	2.67323	7.19155	3.67264	0.144013	0.275201	0.769061	1.85187	0.382021	1.46714	1.11986	2.22015	0.750739	2.22928	2.79467	0.2999	6.71762	2.23269	4.34877	5.47009	5.15271	4.62617
PLIN1	3.0618	10.4936	1.12103	101.621	0.630901	0.863519	2.59227	6.46009	5.95365	1.21116	0.193133	150.822	1.19142	0.139056	3.8206	24.279	0.270386	0.157082	1.38112	0.613734	6.80858	0
GPR68	6.57457	9.84243	16.1725	4.45143	0.274335	0.820637	0.889339	11.5444	0.32219	0.549618	0.591787	2.76136	0.408423	2.18947	1.53751	0	2.04591	1.25559	14.9037	9.96941	8.19784	10.6166
FLJ42393	1.94572	5.84024	6.79613	22.7478	1.97418	1.41161	3.9823	2.95111	0.570703	1.88528	0.847501	0.572245	2.15577	2.03336	1.46728	0.762947	2.12674	0.608002	3.9788	7.80671	0.821981	8.85094
FBP1	0	0.0347988	0.272387	0.00878511	1.6555	0.162085	0.200154	0	0	0.0526618	0.0960993	0.199178	0.115085	0.194639	0	0.445014	0.0274291	0.0738437	0	0.0551021	0.00644241	0
RASA3	1.18674	2.07491	1.82129	3.52785	1.1686	1.37866	1.2166	0.582315	1.30299	2.3617	1.76641	4.22099	1.68869	3.4784	3.57426	0.759009	1.89272	2.38421	2.08239	2.16826	1.67737	3.63576
SLC6A19	0.630992	0.0308402	0.39483	0.112675	2.4035	0.0136814	1.08032	0.885481	0.0114731	0.00682799	0.0131991	0.794966	0	0.0231238	0.230882	0.173949	0.0107116	0.0876724	0	0.175192	0.259794	0.156688
ZFAND5	0.55629	0.598285	0.107769	0.0348722	0.784706	0.603341	0.335368	0	1.06981	0.587727	0.960063	0.390331	0.989062	0.367087	0.202051	0.27291	0.286859	0.550951	0.259645	0.25563	0.152203	0.182837
PPAP2B	0	0.111497	0.0685626	0.445355	0.789254	0.449064	0.900238	0.821093	0.434712	0.602169	0.925052	0.310672	1.15495	0.422984	0.596772	0.179185	0.287999	0.597315	0.441285	0.232823	0.100522	0.222421
PLCD3	5.74198	4.38972	2.77304	1.91022	0.544311	0.843759	1.12898	3.12456	3.93067	1.27222	0.735458	4.30987	1.01874	0.897087	4.11156	2.57967	1.86695	1.39049	5.88783	5.30006	0.266348	4.12753
FHOD3	0.940562	0.491949	0.383042	0.433934	0.334826	0.587413	0.957726	0.0958975	1.38678	0.300779	0.550257	0.348918	0.335297	0.692727	0.474632	0.0361877	0.310947	0.510158	0.374798	0.567039	0.560425	0.223217
ADAM33	4.7645	1.17563	1.1095	1.7663	2.67806	0.861851	1.8391	0	1.93352	3.332	1.82575	9.35097	0.135111	8.8474	26.4049	5.04807	3.23568	6.47866	3.67821	4.10897	7.37072	7.84758
ABAT	0.24237	0.540946	0.421754	0.18535	2.282	0.168973	0.453911	0.204058	0.0261648	0.144408	0.162303	0.353238	0.11404	0.479751	0.238981	1.29045	0.79812	0.0936509	0.195436	0.683077	0.448109	0.401527
SFMBT1	0.741777	5.21644	5.04061	11.8837	1.02898	1.10807	2.95589	3.11223	1.30459	0.883676	0.962857	1.28289	0.581761	1.69617	0.810566	2.27849	2.83882	1.47141	1.55317	4.27777	2.49782	4.39484
ZFHX3	4.95057	3.48495	3.1467	4.1355	0.490715	0.960133	1.01684	2.07414	0.653523	0.918689	1.02426	1.74217	0.94245	1.5637	0.986584	1.04584	2.72967	2.17157	2.89936	3.83129	4.25439	3.67453
ACO1	0.307588	0.730015	0.0328758	0.970743	1.22912	0.506278	0.476121	0.979176	0.514132	0.341546	0.495957	0.788391	0.415605	0.131982	0.281761	0.252082	0.302679	0.131252	0.23733	0.0941216	0.199672	0.185701
SNHG7	0	5.31438	7.10035	3.02151	3.12769	2.92321	11.5611	0	1.61412	3.1926	1.7023	6.29441	2.51686	5.50648	3.58769	0	5.45508	0	4.93392	11.5307	20.5739	12.7498
E2F1	0	16.0951	8.8323	9.54396	0	2.54993	4.03559	0	1.11156	2.05757	4.3366	5.09341	9.043	0.494505	0	25.1166	2.74773	21.5755	0.380554	3.61204	8.49044	0
TIMP3	0.00616338	0.236193	0.0722762	0.206857	0.617834	0.204652	0.384237	0.685723	0.180975	1.49131	0.447781	0.410736	0.56688	0.371433	0.959298	1.02542	0.196745	0.951805	0.213041	0.368504	0.256346	0.10069
HECA	0.819243	2.23248	0.843825	5.56788	0.999052	0.867532	1.34051	1.25122	1.72339	1.66176	1.18251	1.79247	1.98191	1.39959	3.66511	2.23897	4.29309	0.865782	2.25961	3.53782	4.05515	5.84273
CASP9	3.17469	2.46082	6.62581	4.79624	2.60889	2.04034	2.36126	1.86325	1.23751	1.30318	0.917857	1.23454	1.96599	1.45866	2.57733	2.1596	0.0489326	2.5142	1.75776	6.2424	6.75694	9.48657
SLC17A4	0	0.0233689	0.163582	0.499603	0.426297	0.0512516	0.265171	0	0	0.0736492	0.0417669	0.0236546	0.218776	0.0131414	0	0.404014	0.137985	0.0386244	0.213234	0.213634	1.65879	0.133243
H6PD	0.306106	3.29399	6.1513	2.48037	0.915101	1.25734	0.983178	0.899633	1.16577	1.72453	1.04079	2.2296	1.54194	1.52601	1.58385	1.53462	3.57159	1.12606	1.42326	2.29648	5.25261	2.585
TRPM6	0.42386	0.39809	1.23557	0.580631	0.0170333	0.0314483	0	0.325691	0.0152093	0.024682	0.0413328	0.0696922	0.0408327	0.0137972	0	1.05321	0.547859	0.035508	0.244114	0.29136	0.192073	0
CDH2	0.639975	0.0834987	0.0140894	0	1.46508	0.135051	0.637026	1.59598	0.0371348	0.39423	0.378229	0.129371	0.112715	0.252353	0	0	0.156348	0.389096	0.0285064	0.011905	0.0545008	0.337107
NPDC1	2.53356	2.25207	1.36363	1.11425	1.29724	1.21211	3.74593	1.54891	0.683152	1.38223	0.838235	5.53671	1.41842	2.25475	3.24564	1.5442	2.45813	2.66545	6.07523	3.75524	0.503221	4.78105
HNRNPU	0.615043	2.59489	1.66723	4.44666	0.824295	1.73771	1.23071	1.71256	0.631565	1.66723	1.36677	1.10533	1.77786	2.24468	0.969172	2.11051	1.66723	1.44648	2.50366	2.81414	2.81414	2.50366
ARL6IP4	0.464983	4.01254	1.44299	2.10567	1.22389	1.5826	2.2462	2.1412	2.57421	1.46087	1.16135	2.36417	1.28899	2.07525	1.7105	0.471367	3.42806	0.462181	3.08272	3.92525	4.80377	2.87402
CSNK1E	0	3.91663	0.0976692	11.9079	1.05656	1.64089	4.42085	12.9539	1.47418	2.88413	1.56511	5.15843	4.58973	3.53052	3.09895	1.70103	1.87448	0.446488	5.16684	5.74444	1.10395	3.56252
TSC22D3	0.0115144	0.375653	0.280819	0.22502	0.596165	0.153452	0.740517	0.205216	0.329967	0.770958	0.244233	0.512593	0.306009	0.296014	0.22659	0.580481	0.837596	0.0804319	0.362619	0.192469	0.505097	0.378303
COL16A1	1.98129	1.78661	2.25702	3.17938	0.998335	1.33583	2.45396	0.711435	0.225738	3.51657	3.89851	2.71632	2.19435	3.38104	6.83111	0.521978	2.86762	1.31283	2.51273	3.58334	2.63532	4.08568
ZNF551	2.86871	7.40741	4.83372	4.68123	2.68148	2.00587	1.62733	2.82784	0.932056	1.23602	1.31086	2.40434	1.82375	0.403576	3.83321	1.32414	4.39387	1.70421	3.73844	7.71009	1.66769	21.6194
MAPK12	0.15327	1.05963	7.02952	8.38288	1.72328	1.24998	13.5763	0	11.7834	1.51562	0.611506	7.25245	2.89145	3.71578	1.3583	2.19792	0.643419	4.82216	7.9752	2.71661	0.39958	3.6414
CASC8	0	0.157774	0	0	0	0	0	0	0.167732	0.0190303	0.0336349	0	0.641498	0.103781	0	0	1.99044	0	0	0.0482396	0.0489034	0
PCK2	0	0.00729921	0.306395	0.348124	1.53555	0.117579	0.330668	0	0.0733364	0.149634	0.130732	0.974755	0.274065	0.180518	0.208096	0	0.0985738	0.0315037	0.0553983	0.26587	0.595712	0.468389
HRSP12	0	0.0495517	0.0104246	0.0443394	3.0148	0.272708	0.0504552	0	0.519772	0.113072	0.274446	0.405032	0.222531	0.321148	0	0	0.0693585	0.211828	0	0.259851	0.015359	0
SIPA1L2	0.584329	1.16766	0.287786	1.47999	0.220777	0.188242	0.414515	0.293722	0.402994	0.398762	0.481847	0.0472589	0.866707	0.28708	0.26733	0.15991	0.58721	0.614748	0.540744	0.049375	0.300805	0.39982
KRI1	0.46305	5.16518	2.36778	2.84345	0.814388	1.49037	2.00353	2.01528	0.971373	1.60765	0.889252	2.70767	1.21744	2.19213	1.10028	1.05699	2.50071	1.18974	3.82735	6.1734	1.37796	5.4655
CSMD2-AS1	0.912514	0.0854403	0	0.250855	0.127729	0.0327953	0	0	0	0	0.102413	0	0.094646	0.0466038	0	0	0	0.19447	0.050919	0	0	0
FABP1	0.190915	0.299866	0.234224	0.592332	1.83782	0.00694883	0.342497	0.768185	0	0	0.00727204	0.0295729	0	0	0	0.51945	0.122106	0.0489004	0	0.170553	0.0160631	0.199512
CPEB2-AS1	1.72939	0	0	0	0.669094	0.0761587	0.148234	0	0.325257	0.1368	0.149255	0	0	0.847138	0	0	0.0861635	0.0649289	0.0361397	0.0826924	0.0692166	0
ADCY6	0.288309	2.70174	1.61117	4.85098	1.27886	1.97411	1.9484	1.18914	0.449058	2.32318	1.28189	2.02158	1.05806	2.4193	2.04545	1.2729	2.23552	0.945625	2.16466	2.10738	1.18717	5.13667
RBMS1	0.1791	2.50512	2.96127	3.57131	0.3745	1.03747	1.35424	1.03709	0.513652	1.32694	1.78663	1.89581	1.66172	1.18165	1.92962	0.197418	4.0775	2.55589	3.7434	4.4312	5.32385	4.25115
LINC00208	763.49	1.68874	143.98	110.384	0	3.29801	0	0	5.3245	0	0.794702	0	0	0	0	433.43	1.29139	36.8742	0	33.3775	2.62252	220.272
OGDH	0.182375	0.447892	0.692617	0.115081	0.988144	0.84854	0.523746	0.417639	1.84193	0.534435	0.541338	0.59184	0.391731	0.47643	0.250441	0.10422	0.370138	0.639685	0.350803	0.593912	0.628524	0.399219
SCARNA15	6.73892	19.8518	1.38462	1.52785	3.61501	2.67374	46.4187	58.4983	4.78136	2.00189	0.426298	1.4119	3.7446	1.02311	24.4081	16.8746	0.392194	0.6241	0.603638	3.85032	0	12.3797
DAB2	0.362627	0.0766703	0.0417115	0.0339668	1.5984	0.54556	0.508677	0.0899486	0.181439	0.542978	0.87471	0.659627	0.953245	0.776587	0.448416	0.383638	0.656376	0.646385	0.150185	0.181176	0.761492	0.146946
SNORD97	0.0644585	6.33263	0.603094	0.181278	2.50093	2.67635	12.6682	3.29712	0.479469	1.25259	4.5569	7.91715	6.8896	6.19615	3.45004	0.751103	0.682296	1.61222	8.86343	4.76681	0.168046	10.6841
SPN	5.51275	3.74018	7.4923	3.898	0.258902	0.387779	0.166782	11.1417	0.234781	0.724558	0.912934	4.70549	2.26396	3.15598	1.24742	2.43189	1.79003	1.84976	8.87342	3.48243	1.34666	6.69079
KLHL34	0	34.2696	257.205	5.28281	0	0.759919	6.01984	0	130.624	0.393693	0.119023	0	4.294	3.63479	25.8647	32.3698	17.295	4.18871	2.38962	0	23.9649	16.6175
ACO2	0.0275172	0.17921	0.231627	0.0326558	1.52538	0.874285	0.784993	0.122491	1.72222	0.417855	0.300907	0.768575	0.323341	0.514444	0.504487	0.64373	0.0398693	0.283792	0.322367	0.221948	0.251666	0.522479
ABCC2	0.388967	0.563974	0.0282231	0.450198	1.32569	0.0395916	1.62191	0.641451	0.0661079	0.0458397	0.0590369	0.2064	0.190399	0.101128	0	0.575556	0.587931	0.188296	0.0636696	0.0123438	0.068729	0.0710759
COL6A2	0.477269	2.13617	0.902135	3.21133	0.857175	1.07989	1.41755	0.71333	1.02098	5.58267	1.85624	2.12084	1.62531	3.48274	8.54009	0.723892	3.60496	1.49004	2.01215	4.00026	2.64686	2.94451
STUB1	0.601485	1.60865	0.691561	4.49012	1.28755	1.6282	3.35357	2.97858	1.97701	1.21991	1.04797	2.17862	0.739756	1.95864	1.31522	1.20944	1.43424	2.14567	2.39439	3.24742	3.59526	3.28823
MICALL2	0.208606	4.41044	4.55941	3.25733	0.65394	1.67307	3.40367	2.72236	0.142639	2.28811	1.94063	4.89618	1.5814	3.78153	1.27591	0.785346	2.37029	2.55394	3.39779	4.96237	1.91018	3.29789
DPY19L4	2.20282	5.70367	11.3698	21.1437	1.44894	1.54888	1.9894	0	1.23029	1.48661	1.98857	1.11858	1.92879	1.68792	1.89243	1.88696	0.925953	2.22778	2.55231	3.71855	1.21626	6.88357
RAB11FIP3	0.00280397	0.43619	0.113109	0.394645	0.054291	0.316035	0.0303832	0	0.1051	0.270312	0.133995	0	0	0.416764	0	0.0223701	0.398818	0	0.283267	0.357716	0.29112	0.374474
CFTR	0.273939	0.980717	0.0148503	0.044353	0.221072	0.226814	0.298987	0	0	0.268791	0.175729	0.0905871	0.158701	0.0297007	0.799443	0	0.590252	0.0905871	0.314332	0.447589	1.01329	0
GOLGA8A	0.152689	7.42281	6.40322	3.94633	1.08834	1.65629	2.12664	0.427803	0.215828	2.76081	1.14215	1.38139	1.71691	1.48597	5.03338	2.10828	3.67656	1.3305	4.39956	4.68426	0.00565039	6.38982
SLC8A1	0.439858	0.546476	0.148134	0.00489396	0.428488	0.133652	0.426258	0.547159	0.107651	2.14088	0.167976	0.310084	0.977628	0.593152	0.613726	0.0632054	0.441439	0.239155	0.110797	0.0503546	0.899607	0.0604255
ZNF528-AS1	0.619185	10.5658	0.244529	3.1659	1.1794	2.03014	1.82453	5.60805	0.852706	1.23994	0.960425	5.85729	2.02346	1.81667	0.934085	5.54161	1.48526	0.359717	6.63963	17.2302	2.56677	14.3938
DRAP1	1.2487	6.26817	1.3036	4.18598	0.742598	1.94073	1.74293	1.19507	2.71077	1.81087	1.13693	1.84327	1.27597	2.04601	0.832228	0.774725	3.30066	3.33404	5.12611	4.89465	0.849057	3.59384
LOC730668	42.0261	26.3099	16.1787	4.53913	0	1.52964	0	0	3.21581	0.739921	0.18498	22.7241	0	0	0	0	34.3992	30.849	62.9431	8.03241	37.2451	0
PLCB3	0.394323	4.74467	1.79737	2.0449	0.658015	1.32883	2.54261	1.50479	0.517947	2.07179	0.844916	4.3319	1.44487	2.30909	1.31238	2.6992	2.50815	1.96918	2.78121	3.09109	1.00865	4.44158
CKB	0.0557697	0.696698	0.0985001	0.192936	0.240775	1.01709	0.592327	0	0.193754	0.449121	0.279441	0.21543	0.0999959	0.462273	1.54284	0.218337	0.00476977	0.0258245	0.249693	0.194799	0.111455	0.565656
FAM151A	0.0539001	0.0334471	0.830361	0.260634	0.693618	0	0.217711	1.77861	0.0479425	0	0.000469104	0.191441	0	0.00759949	0	0.148659	0.094806	0.00858461	0.00830315	0.107472	0.0233145	0.520096
HMHA1	0.773285	3.43692	4.32136	2.02201	0.379938	0.951402	1.1393	3.51477	0.151041	1.56413	0.677435	4.93548	2.13931	7.77091	0.522847	2.54079	2.54642	2.38249	5.30114	3.79142	2.83569	0.743526
LUC7L3	2.1875	3.18432	2.28255	2.64473	1.00197	1.03112	1.31097	1.88882	0.375617	1.34126	0.65419	2.77441	0.856376	2.1875	0.969645	2.46208	3.04859	1.27434	3.35467	3.35467	3.18432	2.77441
SDHA	0.0266233	0.0625099	0.195542	0.0324213	0.89527	0.967246	0.432853	0.289949	2.50273	0.601738	0.422947	0.594182	0.424638	0.296372	0.253674	0.104431	0.0912969	0.541577	0.422356	0.446139	0.223281	0.338784
FOXP4	1.019	3.43291	2.65412	6.4089	1.27892	0.925014	2.26132	2.01447	0.392533	1.25039	0.818167	1.45489	1.76709	1.40309	3.21322	0.84367	1.40899	1.52232	2.19581	3.57196	5.35541	3.66579
MBD5	0.498905	1.16547	0.339067	0.707741	0.53419	0.58755	0.276531	0.459846	0.608846	0.564801	0.779834	0.171611	0.54586	0.418952	0.32023	0.49707	0.352433	0.724292	0.306345	0.342946	0.248552	0.0391631
FNBP1	0.821981	3.01332	1.03575	4.05765	1.90765	1.21545	1.51468	0.966438	1.14474	2.20568	1.36781	1.79185	1.43185	2.52253	3.98574	1.02984	2.04179	1.50734	2.11397	2.01145	2.23361	2.66066
RILPL1	0.262907	0.768994	1.46712	2.18332	1.41043	1.60595	3.2226	3.6763	4.51252	1.80703	1.04715	3.08451	2.27201	3.93291	0.730536	1.31611	0.791704	2.57619	2.98688	4.30862	2.2512	3.8666
EFCAB13	0.137512	3.29994	1.65224	11.9848	1.40437	1.9098	3.39467	7.31362	0.25049	1.61522	5.29678	3.16207	4.7064	1.8823	0.283318	0.675423	2.06652	0.794164	2.61098	6.29481	1.88038	8.07609
NTN5	132.822	10.0065	4.77999	0	2.11915	0.417243	2.65718	0	1.32859	2.06791	1.90321	18.1391	1.83001	5.78284	0	18.9736	0.618544	17.4364	11.6206	22.3078	14.4534	187.737
KLK10	31.7241	23.5469	30.1812	134.647	3.76898	0	0	0	0	1.21224	0.293878	29.9829	13.0849	3.44571	0	71.8531	0.844898	22.3935	52.9567	8.29469	7.33224	26.6694
ANPEP	0.137225	0.254388	0.261399	0.12561	3.07756	0.0663435	1.20093	1.60066	0.0216161	0.243876	0.0371989	1.00911	0.0855093	0.356421	0	0.349603	0.206863	0.038598	0.0405745	0.324448	0.35377	0.0910169
IGLL5	18.2508	0.057145	3.24987	0.428924	0.298499	43.9687	0	0	0.244043	1.11735	0.768432	0	0.579517	8.04601	2.6159	0	16.406	2.61253	9.15328	5.66542	0	1.56779
FER1L6	0.675513	0.728074	0.246225	0.951807	0.101928	0.0741019	0.0246667	0.37615	0.0434554	0.0601037	0.0680881	0.288967	0.227912	0.117999	0	0.168114	0.655399	0.14732	0.554286	0.336499	0.399797	0.250642
CALB1	0.070913	0.143413	0.00576783	0.00657264	0.0838123	0.0707341	0.14243	0	0.00599139	0.13579	0.000380051	0.0204557	0.295836	0.230601	0	1.59308	0.00257093	0.0338245	0.0261564	0.0375579	0.145962	0
CLIC6	1.40333	5.69341	3.20616	50.1457	0.468957	2.52529	1.33609	0	2.59873	2.10279	2.23772	6.17166	4.17947	1.6033	0	0	0.186698	15.933	12.5535	16.7374	1.475	13.4201
TRPS1	0.970062	0.369898	0.388847	0.16873	0.833731	0.554567	0.49413	0.234551	0.357914	0.536872	0.712298	0.112461	0.666507	0.519736	0.421709	0.936428	0.0192581	0.57506	0.510609	0.149009	0.0762025	0.0700469
ALDH1L1	0.164768	0.461526	0.281798	0.412582	2.3528	0.425518	0.843878	0.409411	0.5592	0.247775	0.0806333	0.925853	0.115357	0.38134	0.182762	0.590403	0.362276	0.036105	0.0960791	0.310044	0.214354	0.239176
PEPD	0.295483	0.155604	0.76708	0.0171506	2.01044	0.21037	0.515766	2.00472	0.166453	0.156436	0.164149	0.661813	0.201185	0.172947	0.183098	0.272745	0.0886064	0.550617	0.0904344	0.302216	0.0148321	0.0346579
RPS2	0.579664	1.78924	1.28319	2.74576	1.31309	2.05752	1.84002	1.53218	1.92487	2.53417	2.85018	1.71688	2.50802	3.70193	0.741007	0.788452	8.23259	1.73786	2.95201	2.43684	5.95385	1.6457
ZNF598	0.122391	3.33775	2.65243	3.35749	0.610247	1.4638	1.98989	2.98627	1.05971	1.56917	0.859537	3.14651	1.14613	2.37183	3.7876	0.56673	1.61331	1.07697	2.68406	5.11495	2.54729	4.55995
CACTIN	3.8619	4.827	2.31237	3.42948	0.687134	1.22563	1.6378	2.51076	0.875279	1.01954	0.722575	0.588374	0.383665	2.94268	2.25055	0.814085	2.62115	1.45453	2.48251	5.91143	1.64292	5.82098
ALDH3A2	0.265011	0.1546	0.0387127	0.0625006	1.09157	0.560708	0.28813	0.596368	1.00498	0.5212	0.567229	0.544654	0.514721	0.373917	0.357696	0.216724	0.157945	0.0936045	0.0873336	0.189007	0.0942735	0.359326
UPF3B	3.16754	8.44687	3.56692	2.66112	1.69641	2.06902	1.31282	0.831926	0.896575	1.70574	1.17117	1.60566	1.18527	2.13854	3.11028	0.774711	1.79843	0.199228	6.87171	7.46914	0.368002	5.7372
ALDH1A1	0.0355897	0.0166962	0.0628583	0.0207847	1.23836	0.951845	0.34066	0.365857	0.387903	0.496041	0.685372	0.38621	0.431039	0.348405	0.455192	0.210404	0.285348	0.288176	0.189836	0.124312	0.417585	0.154804
DCAF16	0.215018	3.72615	3.21171	4.0565	1.5858	1.37206	1.96336	8.02141	1.03943	1.63383	1.43918	3.19716	1.90023	1.81419	1.63646	0	1.95481	2.0625	3.14159	4.77159	5.48641	3.63238
VKORC1L1	0.109762	2.07115	1.02697	6.20638	1.09456	1.27128	1.95415	5.0233	2.7492	1.49225	1.14912	4.22439	0.616244	1.84873	2.41525	6.38969	2.441	0.490549	3.27612	4.64267	6.78142	3.43352
FBXO21	0.0243029	0.373808	0.0480981	0.328946	0.762231	0.63803	0.600698	0	0.700828	0.621046	0.479903	0.217943	0.409828	0.340219	0.574491	0	0.0696937	0.130673	0.27814	0.290027	0.851659	0.31323
EIF5B	1.41148	3.30833	2.07392	1.99764	1.42109	2.29379	0.971499	1.5065	1.32124	1.46441	1.20262	1.70281	1.71239	1.12663	1.64349	0.721539	1.49016	0.967642	4.21573	3.22146	2.30714	2.54116
SET	0.0657599	6.70889	2.52517	0.992722	1.04425	2.21478	1.05491	2.53844	1.16917	1.52726	1.23218	2.35672	1.94553	1.57778	1.54898	1.33913	2.11259	1.14294	8.25826	3.45322	2.38646	2.87412
PF4	113.776	7.22687	3.46567	0	4.92985	2.22985	9.75224	0	0	0.443284	0.228358	12.291	4.4194	25.2537	0	131.373	2.27015	0	4.29851	580.728	53.0463	15.1925
CARNS1	65.5698	0	13.1461	4.08413	1.25496	2.71155	3.74177	0	40.9883	1.19825	0.017853	7.11179	1.7748	1.50175	0	30.5643	5.672	15.6686	10.4755	1.76429	0.521937	11.6433
EML3	0.919297	2.17136	0.41458	4.12307	1.40146	1.96029	3.09854	1.4711	0.324614	2.09048	1.47281	4.73336	1.96304	2.40343	1.46732	2.68688	0.928816	0.860635	3.2319	2.47401	1.34014	3.21775
ZC3H13	3.47109	2.86954	4.67999	4.67999	0.859077	1.45148	1.2619	0.614047	0.651667	1.33044	0.827457	1.57861	1.32537	1.71263	1.42196	2.38757	2.72635	1.11861	2.96574	2.56524	2.45665	3.31979
NFAM1	18.2025	16.281	13.1271	9.36423	0.660202	1.26542	0	27.9145	0	1.58018	1.30849	3.4971	6.30101	2.04795	2.38836	4.48076	11.1804	4.39554	3.80177	3.16219	0.155315	5.07957
CDC25B	5.11302	1.25138	0.466824	0.915125	1.59991	1.92082	2.26162	1.50911	0.678077	2.32651	2.52401	0.966489	2.8547	3.42107	0.592394	11.2411	2.86356	3.33175	2.25764	3.64505	2.23787	2.27753
NBAS	0.22922	0.75789	0.0712295	0.206361	0.783361	0.640004	0.440562	0.291143	0.836528	0.709274	0.842447	0.399742	0.736991	0.556733	0.999111	0.848978	0.600777	0.145418	0.236139	0.279856	0.536446	0.250936
ALDH8A1	0	0.266855	0.115126	0.00911285	2.40954	0.0826232	0.743001	0	0.20428	0.0916854	0.202963	0.754291	0.239364	0.226302	0	0.495131	0.191269	1.00297	0.0162006	0.0850532	0.996996	0
ARGLU1	0.198757	6.20951	2.8757	4.59634	1.12623	1.32477	1.43916	1.28715	0.424941	1.60742	1.03119	2.04718	0.892148	3.03346	0.859152	3.80929	2.01067	0.507193	4.7724	4.7724	0.617198	4.17054
MEIS3	0.371797	1.03307	0.339088	1.27839	1.72488	0.889697	4.35363	12.2513	1.08759	2.85935	2.53389	1.29148	2.6342	1.63547	5.93676	11.1381	0.891332	2.3638	1.73087	5.39924	0.544067	2.67672
ANAPC16	2.33608	4.08448	2.28381	5.87098	0.979264	1.12047	1.14493	2.47094	3.30016	1.35076	1.48102	1.99934	1.05235	1.90968	1.82477	1.42056	2.76227	1.20787	1.85748	3.11638	4.40421	3.48927
EPHX2	0.530157	0.247399	0.237293	0.0170124	2.03359	0.53405	1.35232	0	0.451628	0.223641	0.260465	0.496719	0.403951	0.415177	0.262065	0.0757291	0.0340781	0.0597033	0.308516	0.303983	0.376165	0.130926
DDRGK1	0.439289	5.44969	2.64686	2.86442	1.15576	2.20134	1.95842	1.69342	0.80011	1.7192	0.753108	2.89174	1.60995	1.77056	0.706915	1.18921	2.30118	2.0881	3.42587	2.89174	1.77267	2.5493
ALDH6A1	0.0371022	0.206766	0.00762322	0.00841183	3.29164	0.290546	0.413776	0.304685	0.562748	0.169757	0.192871	0.893644	0.280801	0.310449	0.0978814	0.128675	0.00433735	0.425774	0.13534	0.0315444	0.177155	0.0921921
ZBTB4	1.63331	1.67688	0.821226	2.27496	1.34332	1.19664	1.6285	1.57716	1.34135	1.84915	1.30256	2.90634	1.29653	1.68661	2.81418	0.517659	1.66308	1.15625	2.37711	2.44146	2.64151	1.84915
NR2F1	0	2.58775	1.32885	5.74823	1.05469	0.444549	1.45848	4.67122	0.0382787	3.06998	1.69133	1.93545	1.64583	2.64659	3.99109	0.423692	4.15627	0.725529	4.31797	3.85131	6.66176	7.7723
PEBP1	0	0.0045727	0.178104	0.0295301	0.916434	0.710955	0.257749	0.264093	0.682595	0.302614	0.363614	0.0491758	0.177843	0.390789	0.238473	0.156965	0.195056	0.843132	0.428618	0.0938405	0.446985	0.0174132
FMO4	0.0660817	0	0	0	1.74661	0.296883	0.822727	0.85228	0.20183	0.18594	0.441837	0.0401141	0.352404	0.210841	1.16563	0.598611	0.123831	0.0464122	0.0505787	0.0692792	0.131776	0.109587
FMNL1	0.800173	3.01705	2.49688	1.99302	0.116561	1.01013	0.969362	0	0.771079	1.46525	1.44061	7.67466	2.62752	3.49941	1.41559	2.2456	1.66687	5.52245	5.15887	4.66854	2.30712	4.5744
PDZK1	0.059876	0.0581704	0.173582	0.0394089	3.66891	0.241418	0.878006	0.44767	0.00626771	0.185424	0.311292	0.588596	0.035762	0.392356	0	0.283309	0.00234346	0.214225	0.0922962	0.116854	0.285999	0.0323369
FREM2	0.181545	0.814003	0.385607	0.173851	1.01937	0.509687	0.527775	0.29043	0.738368	0.56261	0.48072	0.412101	0.179929	0.314645	0	1.33454	0.698636	0.258634	0.125518	0.0730803	0.409563	0.119247
ASB16	1.82082	11.1999	21.6283	3.9914	0	1.17473	0	0	43.1658	1.34026	0.181549	0	0	2.11985	53.6476	0	0.307031	8.13764	1.39365	22.4987	23.0914	19.6953
TAS1R3	10.9197	0	158.075	0	0	1.08342	0	0	2.54699	1.17846	0.646251	38.7846	0	9.89335	0	60.9662	22.9514	49.5523	24.9567	10.7297	3.22175	0
XPNPEP2	0.0201622	0.481321	0.0672271	0.00869162	2.2056	0.0144269	0.218473	1.00048	0.0397923	0.0417139	0.0298885	1.56831	0.0499621	0.170314	0.225834	0.112252	0.0846399	0.035683	0.0617578	0.0894291	0	0.145156
HRAT13	0.367572	0.771417	0.0640958	1.30129	0	0	0.0748128	0	0.258032	0.00340058	0.0694543	0.0942889	0	0.0483295	0	0	0.00669812	0.734216	0.327177	0.116341	0	0
TMEM249	147.997	2.67483	109.825	122.381	29.9895	0	0	639.22	32.1608	3.9021	0.314685	0	0	11.9266	0	0	17.6853	21.2727	82.6364	72.0944	0	0
SLC22A8	0.176211	0.0117533	0.273471	0.0139379	2.32096	0.00249047	0.98629	1.87851	0.0112945	0.00657571	0.00332062	0.860325	0	0.0173459	0.225431	0.0898971	0.00504647	0.249134	0.00386678	0.115282	0.0108576	0.107265
SMAD6	1.44946	5.08212	0.100858	8.64084	0.648278	1.10603	5.76623	4.41584	0.500396	1.70988	0.624928	1.52632	2.0165	1.32493	1.57221	0.566229	3.01973	2.32962	5.39491	6.92091	5.6383	5.31529
SNORA34	5.36538	0	1.18007	3.52448	3.49301	1.69143	36.5114	134.945	9.5743	1.84878	0.133741	25.1276	11.7063	9.14161	22.6259	32.3733	0.511364	5.31818	2.51748	8.88199	0	18.3462
GOLGA6L2	0.291867	0.91029	0.138406	1.02693	0.0145765	0.0153396	0.024277	0.232384	0.00980392	0.0152362	0.0583838	0.253324	0.00754048	0.0303559	0.0858425	0.970989	0.406643	0.48726	0.400654	0.118371	0.652323	0.0954136
RALGDS	14.0079	3.26719	0.875269	1.68838	0.75913	1.19781	3.15672	0.997421	1.06685	0.959104	1.11069	1.30249	1.60923	2.6349	2.71517	0.783813	2.78669	2.17328	2.85655	3.13686	2.63098	3.13133
MEI1	0.841819	0.8866	0.197244	0.346469	0.0252842	0.0416121	0	0.982776	0.0250086	0.0616604	0.0914227	0.0630382	0.148192	0.119394	0.163693	0.941991	0.372098	0.127868	0	0.0777816	0.0936962	0
HSPB6	0	0.184057	1.39252	4.19274	1.02694	1.6801	0.961332	7.47783	41.0257	7.59833	1.90064	4.11365	0.323574	3.90889	58.1433	3.61986	12.5883	0.627647	0.659787	2.35771	0.271451	3.94596
ANKRD23	0	1.14351	0.0920515	3.35203	0.94335	2.73764	22.8791	0	114.347	1.7265	0.890188	1.13958	0.279366	5.60872	5.41142	1.46819	2.7801	2.54212	5.22196	5.6865	0.177324	9.23762
ZRANB2-AS1	0.637996	0.0344315	0.0607615	1.57534	0.562247	0.244666	0	0	0.463813	0.15636	0.10694	0	0	0	0	0	0	0.194032	0.0716986	0.0883068	0.0534702	0
EPAS1	0.666422	0.176346	0.183284	0.391698	0.609342	0.251808	0.508359	0.34455	0.343652	0.988315	0.49507	0.927731	0.666422	0.625689	0.743326	0.170426	1.09692	0.232535	0.423732	0.317128	0.70207	0.26133
SPTBN1	0.0896188	0.190538	0.234984	0.231361	0.915962	0.737381	0.314382	0.219994	0.220779	0.737381	0.595471	0.40208	0.497839	0.538234	0.50474	0.430933	0.425682	0.497839	0.238268	0.182013	0.299628	0.197824
PITX2	0.341046	0.353571	0.0143417	0.183383	0.0350894	0.0205565	0	0	2.13309	0.0157759	0.0145329	0.0395831	0.0557415	0.0154891	0	0.189502	0.0727603	0.414571	0.524046	0.107945	0.978583	0.108137
LOC100128993	0.423021	1.88893	0.0829505	0.199375	0	0	0	0	0	0.00440091	0.0794832	0	0	0	0	0	0.101488	0	0	0.498637	0.0452094	0
LIMCH1	0.520599	0.902773	0.407476	0.413334	0.534825	0.759366	0.551791	0.435368	1.58162	0.478307	0.507383	0.478307	0.503357	0.418126	0.352095	0.147023	0.345345	0.804302	1.2345	0.863915	0.170028	0.680964
SNORA62	0.138955	2.05529	0.422064	4.51101	1.80121	2.55657	17.2467	4.9136	0.116702	0.631645	0.758627	5.25451	2.74293	6.16467	3.08022	1.32823	3.45754	0.320478	4.35814	10.0953	0.0601048	10.1454
PGF	7.26085	1.09372	7.29236	13.2966	2.94989	0.439288	3.20734	9.96589	1.38358	0.971294	0.559012	6.09602	0.584217	0.616623	8.45719	6.96379	2.57722	0.608522	0.288058	6.21304	8.4932	14.5856
PCGF6	6.69612	4.35226	0.388561	0.7209	2.15645	1.87097	2.56188	0	2.74991	2.36385	2.17457	2.54939	2.74679	4.30166	0	7.57007	3.02041	4.45096	5.52669	9.46977	0	18.1943
FCN1	2.56405	3.51596	1.24274	0	0.222678	2.52585	1.05045	0	0.738352	0.167551	3.49383	4.87243	23.8387	12.6644	0	7.53067	6.04833	3.2985	25.229	9.46359	5.40417	11.7325
NAP1L1	0.355567	3.40202	2.97541	1.17977	1.01664	1.56104	0.909177	2.83401	1.26022	1.56962	1.50201	2.37863	3.18085	1.36851	1.52153	1.88685	3.8357	3.10976	3.73729	3.02158	1.65986	3.06057
F11	0.589781	0.895813	0.192027	0.276706	0.305757	1.09587	0.039946	0	0.0147459	0.0239346	0.198684	0	0.182838	0.28848	0.130732	0.582463	0.181297	0.167707	0.0885304	0.166441	0.28804	0.0622299
RNA45S5	1.09187	4.58633	0.655126	4.58633	0.587175	2.02851	2.57628	2.02851	0.0611055	2.57628	0.230102	2.02851	2.57628	1.09187	4.58633	0.587175	1.42477	1.42477	2.02851	4.58633	18.037	4.58633
SNORA2B	14.0695	0.432203	1.31186	5.8678	10.3983	3.35593	74.6237	120.854	4.53051	0.732203	1.90678	12.0458	7.05763	4.6322	0	22.4136	0	0	0	0	0	18.4576
SETD8	0.510955	5.40419	0.606345	3.27454	1.45714	2.41104	2.67906	0	1.62608	1.89834	1.43889	3.19567	2.00025	3.19371	3.93586	0.447072	1.72125	1.91171	5.22308	4.69692	1.96342	3.03509
RNU5D-1	38.7123	15.1505	20.1561	5.39928	0	1.94663	40.258	43.8985	0	0.310594	0.743981	116.549	3.64767	9.64647	44.4944	0	0.234751	1.72994	0	27.8884	2.56782	53.4835
C16orf52	0	4.35833	5.32943	12.0269	0.868886	1.24409	3.57777	1.77263	1.9302	2.36453	1.88828	1.79783	2.12546	2.84973	6.7238	0.668917	4.21465	0.0431028	6.80247	3.75395	7.27071	12.729
RHOB	0.0164619	0.11605	0.207543	0.377406	0.568087	0.381418	0.881923	0.999019	0.150306	0.53065	1.08778	0.121853	1.215	0.449271	0.489602	0.459888	0.0692719	0.291973	0.241972	0.332963	0.926968	0
SAMD5	0.970352	17.9701	8.78884	30.9883	4.6738	0.405326	1.91053	13.2913	0.0540011	0.714324	0.452656	3.0436	1.21074	2.75676	0	8.9915	1.76766	0.344337	0.392223	2.04752	5.45554	2.50303
IPO5P1	5.65009	8.33089	2.37388	8.44386	1.91593	1.92829	3.55791	0	0.516378	1.18912	1.92829	10.2905	1.53362	2.7848	4.44982	0.480498	2.91499	1.49774	1.74744	3.13342	0.808264	11.0738
HSPB7	2.83493	2.63108	2.84723	0.306479	0.849143	1.21889	5.68884	16.6117	57.2676	0.821728	0.801343	7.19909	2.62018	1.72921	32.3416	0	1.69934	2.83001	0.411216	0	5.80869	3.02085
C4orf32	4.63653	0.530514	1.67724	20.9468	0.566946	2.68345	5.27044	0	2.60434	2.97872	1.50341	1.10822	6.42619	4.47901	0.824396	0.985389	6.69301	6.50461	9.47535	7.30055	10.7106	3.41486
TNNC1	0	0	0	5.79488	1.10557	2.45417	24.6074	34.7015	467.21	0.488121	0.214857	3.33132	0.521497	0.168965	0	0	0.328543	2.33526	0.18461	0.422413	12.9853	55.0816
VCAM1	0.16108	0.0128482	0.0112084	0.408008	1.52939	0.145655	0.511767	2.94443	0.108534	0.770372	0.659387	0.335676	0.533914	0.504992	0.330756	0.0357156	0.335586	0.222673	0.0890006	0.109832	0.48944	0.245144
POU4F2	65.3615	8.8844	10.2716	2.97248	0	3.55046	0	124.283	0	3.33578	0.66055	52.745	0	3.79817	0	32.7303	0	7.91009	2.92294	6.68807	3.64954	0
NUMBL	1.00224	6.65974	7.61617	2.1426	1.02583	1.33242	5.45355	3.32062	0.922159	2.60614	1.77238	2.99265	0.837663	2.54624	3.95841	0.537686	4.27553	0.659339	4.39294	0.634398	0.169331	2.0861
LYVE1	0	0.190928	0	0.181342	0.390341	0.196113	0.206642	0	0.363627	1.23608	0.171599	0.37227	0.83961	0.702425	1.38505	0.64664	0.0180713	0.143785	0.32827	0.360013	0.0780996	0
PKHD1	0.197633	0.196509	0.14394	0.129639	1.20635	0.900843	0.632159	0.252667	0.00701818	0.48691	1.18406	0.326028	0.733258	0.537678	0.0234647	0.217004	0.0801122	0.809127	0.213555	0.156433	0.195385	0.096801
FBXL14	0.615314	7.76937	1.41898	12.3267	1.25064	0.714716	3.48708	0	0.605085	0.899288	1.06118	0.526809	1.02693	1.95313	2.2947	1.20995	3.37278	0.41273	8.47453	6.83406	16.9931	3.89558
HYDIN2	0.313745	8.28547	5.98183	11.5615	0.0839753	1.21542	0.352419	3.57167	0.138673	0.438966	0.484367	3.19195	0.0704245	2.21402	0.440252	2.53162	5.06206	0.0314537	3.29086	6.02644	0.175864	10.6014
RGL1	1.4114	0.658069	0.0698329	0.119428	1.23789	0.118446	0.404441	0.231118	0.218497	0.512169	0.506028	1.6291	0.341825	0.797827	0.666084	0.419888	0.407236	0.608382	0.289527	0.187173	0.31431	0.263946
EBNA1BP2	0	0.2511	0.717496	0.0827366	0.929212	0.538392	0.722155	0.477569	0.613536	0.528082	0.556552	0	0.312311	0.543396	0.139979	0.122509	0.123501	0.2665	0.610689	1.03007	0.642697	0.211802
GUSBP11	0.755003	0.796752	0.338136	0.200757	1.39609	0.451821	1.34101	0.724631	0.156323	0.386966	0.267072	1.29374	0.13164	0.785711	0.0544514	0.287023	0.409484	0.0727585	0.444018	0.254369	0.145131	0.394903
SKOR2	601.876	12.5258	245.928	15.4124	0	0	0	0	0	0.886598	0.103093	0	0	0	0	252.247	3.24742	6.96907	21.5361	2.24742	10.2887	0
ABCB1	0.147132	0.216096	0.472237	0.214842	0.603201	0.575349	0.269213	0	0.0324678	0.165434	0.552752	0.0428991	0.398977	0.166421	0	0.15855	0.691	1.14664	0.0700578	0.0807025	0.0474344	0.534691
NXPH3	1.13029	10.8327	28.1854	1.47065	0.835173	0.831238	0	0	2.82228	1.55328	0.845994	10.1362	0.700404	5.35927	62.6764	0	13.7071	16.2736	8.70292	2.25369	0.12985	4.83004
KLK1	0	0	0	0.261617	0	0.0645043	0	0	0	0.140409	0.0204014	0	0.15001	0	0	0	0	0.0954064	0.0531035	0.121508	0	0
CER1	0.19522	0.800246	0.0254893	1.24759	0.0438653	0.145032	0	0	0.0510774	0.0265761	0.0513738	0	0.0641185	0.0160049	0	0	1.83987	0.0180796	0.0316147	0.0400123	0.0491015	0
TLN2	0.518771	0.528802	0.939074	0.35143	0.776315	0.551959	0.647259	0.147208	0.751011	0.431726	0.528802	0.816581	0.525014	0.35563	0.179456	0.740805	0.462674	1.00755	0.401408	0.34433	0.369448	0.300555
TSC22D1-AS1	62.3897	2.62865	0	0.309456	7.99255	1.9341	2.26074	0	4.67794	3.75645	1.35645	4.07278	1.48195	3.49169	18.4848	30.6877	0.397135	0.546705	5.45845	1.22923	0.226934	1.94441
NDRG1	0.0453741	0.331541	0.0944723	0.240397	1.93286	0.461922	0.635044	0.550924	0.119827	0.706101	0.246099	0.725793	0.441681	0.486891	0.8374	0.532941	0.0981964	0.647519	0.388473	0.486592	0.605136	0.227054
CCDC181	0	0.754175	0.0346658	0.0485989	0.100821	0.581515	0.322414	0.617017	0.0973093	0.258823	0.367836	0.0896182	0.539549	0.19356	0.263058	0.158281	0.0556213	1.10412	0.370957	0.294102	0.255758	0.20231
CNDP2	0.0282523	0.118615	0.0739952	0.136085	1.66837	1.02131	0.473551	0.156169	0.105709	0.61032	0.888371	0.749652	0.413156	0.435629	0.0746691	0.24645	0.338201	1.30177	0.310725	0.184258	0.628515	0.346962
IGFALS	79.6911	53.4723	0	0	0	2.0277	5.46399	0	2.82548	0.357341	0.403047	0	0	0	17.3601	47.6385	4.14681	12.6648	4.8615	6.98061	35.9377	0
ALPP	118.201	10.4329	91.9378	54.9484	0	0.777862	0	0	0	0.709629	0.559515	21.7938	14.677	0	0	0	2.87945	23.5679	7.98332	4.8787	3.39121	0
TTYH1	10.3508	88.3457	287.211	103.75	0	0	0	0	5.50927	6.086	1.63912	0	0	0	0	0	43.4519	0	24.4199	3.3086	167.236	130.447
CA11	1.82452	4.90196	2.64308	1.50976	0.550835	1.21754	2.89199	5.80818	0.978631	1.62846	0.622955	2.08299	0.529034	1.14781	1.75628	0.81244	2.88035	1.63936	8.53846	8.25162	1.52827	8.76199
CLCA4	0	0.261084	0.184729	0.221675	0	0.140394	0	0	0	0.0406404	0.153941	0.509852	0.405172	0	0	0	0.0800493	0.391626	0.21798	0	0.162562	0
CD27-AS1	4.89236	3.31984	1.57482	6.23602	3.41108	2.32619	2.2177	2.88512	2.04059	3.57669	1.84815	1.56447	2.47225	2.32964	3.88721	1.33867	2.07049	0.183627	1.89339	5.25655	5.71159	4.71334
FERMT3	6.78196	1.93572	0.780101	2.97914	0.513436	1.01972	1.16926	3.83412	0.559706	1.2229	1.70415	4.79304	2.31572	3.83166	2.91543	4.80645	2.83183	1.69856	3.04329	1.54277	0.745231	1.09751
IRF3	0.248272	0.861906	1.57721	4.84732	1.34397	2.26137	3.79608	2.20791	0.813927	2.92713	1.74221	1.75849	2.2353	3.8803	3.53771	0.196222	0.295703	1.33512	2.88917	4.28621	2.12588	4.08208
INADL	0.491516	0.699497	0.169805	0.25454	1.82655	1.06984	0.812458	0.178653	0.353382	0.513856	0.883887	0.49753	0.545024	0.725032	0.0562125	0.167689	0.133972	1.07652	0.424752	0.21135	0.590383	0.144593
AGXT2	0	0.030881	0.0585973	0.185086	3.32759	0.0335127	0.453421	0	0.0274831	0.0307478	0.010327	0.558856	0	0.218699	0	0.389161	0.259574	0.222263	0.0173893	0.0072622	0.174393	0.245749
MYL2	0	0.223555	13.5335	28.9861	0	10.8584	3.6803	0	1444	0.0958094	0.0152078	1.39152	2.26293	0	0	27.5308	0	0.483609	1.23336	3.48412	0	161.001
TMC6	0.468897	1.21963	1.16981	1.75202	0.748631	1.29548	1.6621	3.43437	0.369386	2.16321	1.51961	1.59112	3.34104	5.41854	0.852216	0.540933	0.63558	1.4991	4.3017	3.46947	1.24027	0.645439
PRR29-AS1	50.6997	29.4637	32.0838	40.808	0	1.04801	0	0	0	2.02247	1.14913	21.7783	0	0	0	0	6.99591	4.40347	24.141	0	2.03166	45.1379
USH2A	0.888875	0.563841	0.4747	0.877042	0	0.0177276	0	0.709984	0.0255319	0.0140562	0.0557002	0.0670081	0.0196786	0.0527631	0.0750432	0.791992	0.720075	0.119058	0.0170143	0.127869	0.56982	1.02182
AQP1	0.0159819	0.0700421	0.231738	0.400356	3.50459	0.153632	0.69992	1.1934	0.218481	0.291767	0.388685	1.27373	0.116572	0.402314	0.352661	0.406762	0.0972502	0.146951	0.198544	0.104537	0.304335	0.0596652
SCARNA18	11.4592	1.54244	4.52546	8.39612	5.78416	6.52627	42.0897	136.572	0	2.05901	3.47049	11.6993	4.24171	1.17866	89.6362	0	0.472918	0	0	16.6686	2.46645	89.4543
SLC24A3	0.515058	4.66885	6.81493	7.41975	0.356009	0.439237	1.13971	0	5.71531	1.35105	0.680861	0.88915	0.51375	2.15501	1.48177	1.78309	4.20282	0.846664	4.00869	5.20265	6.7256	6.08657
NPNT	0.328422	0.111419	0.102181	0.252896	0.492073	0.321278	0.122284	0.85884	0.0672614	1.5788	0.310074	0.0862645	0.589414	0.332291	1.08533	0.0418957	0.152596	0.371946	0.187009	0.240974	0.0970026	0
KRT8	0.00606585	0.265821	0.168314	0.083561	0.508597	0.830834	0.316287	0.216707	0.00402018	0.44125	0.450091	0.115874	0.749265	0.420376	0.0255797	0.289595	0.224125	1.18949	0.0838546	0.32052	0.515206	0.09861
SOX1	0	17.8676	0	0	5.39706	0	0	224.926	0	0	0.382353	0	4.83824	3.38235	0	80.0147	0	83.4559	4.70588	16.6029	10.4559	126.397
SNORA5A	0	1.07188	3.839	2.68008	5.08926	2.16492	27.6622	14.6856	0.835076	0.682175	2.566	12.2788	2.75026	2.31155	4.4949	2.32998	0.298353	0.35873	0.125457	7.38003	0.278751	10.9524
SPTA1	1.87166	0.517151	0.329288	0.407685	0	0.0114095	0	0	0.0052827	0.00180456	0.0308667	0.0593903	0	0.00996873	0	0.112581	0.652479	0.0385652	0.0462054	0.175915	0.28659	0
ATP2A1	3.30114	1.7045	20.69	3.43711	0.169159	1.53073	4.17182	0	214.424	0.441104	0.130902	0.190822	0.639762	0.216173	4.67377	11.5466	1.74137	2.19584	1.99534	0.329561	0.156253	24.039
PTRF	1.04643	1.43976	1.42678	3.43709	1.03477	1.28577	0.904593	2.45028	1.94385	4.32486	0.808385	2.74237	2.29766	2.53394	8.95397	0.312667	4.49577	1.30321	2.24194	2.40354	4.80317	2.6401
SNORA58	0.942584	0.28429	5.37241	1.55064	3.32376	1.61085	42.8254	26.0522	0.271132	0.356858	0.772329	25.4222	4.90909	1.12839	7.7185	6.23246	0.168262	0.190989	4.61324	12.0355	0.198166	13.9956
FAM109B	22.3575	3.90839	0.139752	4.13571	0.790994	2.94783	0.676398	11.3245	2.4559	2.90776	3.10901	1.49814	0.306522	1.47205	10.0174	0	0.709006	0	7.73106	11.2621	0.463043	9.16957
SNORD41	0	0.364478	0.667613	0.589913	3.0564	3.01346	43.2671	18.847	1.25906	0.712087	1.51465	8.57571	4.46422	4.84199	4.50562	2.10354	4.59815	1.76565	1.90776	15.7099	0.112973	20.4149
KCNK4	204.434	3.90789	3.39474	15.1842	0	4.90789	0	0	0	2.89474	0	111.908	4.32895	2.13158	0	0	2.22368	81.2895	6.86842	59.4868	13.1316	0
KCNH2	6.60391	2.0839	19.8985	10.7407	0.851481	0.303738	0.409117	0	0.575919	0.980527	0.280634	2.79281	1.51475	1.14451	6.70703	7.46835	6.45908	5.40642	2.43948	2.10701	24.2444	0
SERPINA5	0.338905	1.1623	0.0785275	0.0981421	0.337316	0.546412	0.199772	0	0.13713	0.209752	0.0528351	0.263589	0.0712756	0.0810484	0.33483	0.131121	0.0145728	0.195973	0.189274	0.0389875	0.712238	0.0390566
UBTD2	0.23072	2.28289	4.03006	10.072	1.0266	1.23212	1.77867	7.00511	1.73897	1.51602	1.59805	1.11815	2.47742	1.51104	1.46182	0.556219	2.04118	0.0990267	3.14629	5.89663	10.0635	10.0263
PAQR4	71.1192	0.281209	3.01636	20.629	0.486809	0.714959	8.45085	9.9829	7.11113	1.43125	0.894031	29.8015	9.02918	0.397937	0	38.2284	1.3238	0.896684	2.77097	17.1444	9.5213	1.50022
MINOS1P1	5.81603	1.31646	9.96001	18.2609	3.02468	5.07558	6.36277	31.7441	4.76906	3.14694	2.97991	5.01789	9.21869	1.12704	8.23285	0	0.145508	1.59801	0.152396	3.89257	0.427915	22.2921
DUSP1	0.103208	0.247477	0.202119	0.754905	0.163959	0.170145	0.83823	0	0.168887	0.317872	1.26487	0.0159871	0.323603	0.139673	0.270627	1.71254	0.300557	0.215904	0.154577	0.70331	0.164851	0.0407452
SLAIN1	0.807088	0.0539183	0.471189	0.397611	0.180309	0.283086	0.140758	0	0.176471	0.146632	0.242662	0.0935282	0.3156	0.447109	1.10698	0.783706	0.074334	0.154135	0.672961	0.835414	0.19392	0.572453
MIR99B	37.4268	0	0	0	20.1402	9.10976	39.8415	0	0	9.05488	1.42683	22.7195	47.3049	16.4634	0	0	12.6768	50.2134	114.64	0	18.6037	199.207
PKP2	2.00226	1.10269	0.376333	0.0898404	0.356793	0.183184	0.1884	0	0.370339	0.207941	0.156014	0.317711	0.192448	0.499572	0	0.154301	1.28556	0.480965	0.384508	0.0315298	0.214247	0
PYGM	4.44191	2.06491	0.274452	5.84973	0.354179	1.54713	2.68257	0	180.008	0.816538	0.309129	6.94458	1.87493	0.557202	7.09306	0	0.378779	1.41197	0.476882	3.37878	1.17042	17.3918
GRM1	0.0764204	2.08407	1.27678	0.490595	0.0437173	0.134015	0	0.644358	0.0329942	0.0333339	0.104223	0.28278	0.0159634	0.254395	0	0.758431	0.319704	0.0734122	0.0155267	0.0105776	0.640913	0.238238
SH2B2	13.0627	0.631376	1.19805	1.01824	3.25428	1.06932	8.26987	0	9.8684	0.867035	0.903814	2.17542	2.18087	0.620478	0	7.34698	1.64485	11.6181	0.120554	1.14424	1.53587	0
CLNK	0.663641	0.03543	0	1.46987	0.220809	0.239261	0.209635	0	0	0.458424	0.0324847	0.205217	0.0746715	0.0789162	0	0.171693	0.0146398	0.160778	0.0153328	0.0350835	0.238395	0
KLF15	0.253301	0.216557	0.0186473	0.464392	2.27534	0.255459	0.67406	0	0.511378	0.442208	0.0789067	1.56954	0.0267768	0.12998	0	0.880145	0.248065	0.0694912	0.484096	0.105224	0.0101504	0.0519461
GPAT3	0.0634585	0.10466	0.591009	0.0352363	1.52068	0.446418	0.0726265	0.611444	1.37615	0.0970379	0.402787	0.875329	0.387433	0.138902	0	0.227269	0.133379	0.214621	0.550912	0.249692	0.438079	0.0624643
SLC4A3	1.6754	0.929856	3.42086	3.09805	0.300665	2.10616	1.67781	1.96144	0.0892974	0.741941	1.02006	1.39809	2.64294	2.71701	2.17381	2.67131	3.0313	2.04242	3.04994	2.77674	2.90963	1.48418
RNU4ATAC	5.82034	0.292643	7.14068	0.289687	0.939019	1.76177	22.7601	9.84738	1.26024	0.278848	1.23068	6.67265	0.771513	5.67648	3.52452	4.05463	0.227611	0.313335	2.05835	11.2328	0	14.5917
CLCN5	0.765293	0.113607	0.26542	0.218126	1.51164	0.835631	0.170299	0	0.132023	0.259768	0.453125	0.653873	0.168952	0.321495	0.156988	0.124127	0.0179247	0.468244	0.221338	0.023563	0.185264	0
TYMP	0.644083	3.75379	1.14358	1.32063	0.396143	0.857688	1.774	5.04335	0.62166	1.52968	2.04483	3.99098	4.20225	3.70287	1.68536	2.44822	6.49678	0.261487	4.70245	4.48803	3.27986	4.38175
RADIL	9.84614	10.5972	2.56763	6.70751	0.70432	0.597557	3.66076	7.05382	1.55099	0.979462	0.495574	3.59703	2.4529	2.20379	4.83144	9.34791	13.7576	8.787	2.9113	0.21512	1.46176	4.56533
CASZ1	1.84274	2.89526	2.20658	5.52223	0.404889	1.44758	1.49918	1.64263	1.53501	1.13384	0.744991	2.6485	0.834184	1.05285	1.33856	3.11409	1.8962	1.31395	2.22866	2.59281	1.94857	2.09604
CORO1A	6.58094	0.313085	1.80386	0	0.418472	1.58914	0.82421	0	0.159397	1.78981	1.34236	4.52459	3.08036	9.82904	1.04333	32.1371	11.3734	1.51669	9.18223	3.03074	4.83855	3.77415
ZNF526	10.8195	2.92819	0.591882	2.61065	1.5133	1.91871	2.08616	4.04601	1.85772	1.56457	0.923485	4.64471	2.0014	1.65264	3.8676	0.850714	0.264207	1.76882	2.39192	0.772982	0.206321	3.34973
SZT2	2.00553	0.61828	0.803301	0.593289	0.439462	0.454441	0.787155	0.465533	0.213784	0.521648	0.483849	0.55556	0.4709	0.707462	0.529708	0.525203	0.212634	0.416868	0.363673	0.308029	0.498261	0.416407
ALDH7A1	0.68466	0.267238	1.11661	0.427096	1.11461	0.815959	0.227435	0	0.46997	0.656815	0.491781	0.531871	0.614548	0.274414	0.49096	0.101384	0.541438	0.358234	0.394289	0.725927	0.035627	0.263347
ACAA1	0.0175629	0.19278	0.186625	0.10015	2.75266	0.361533	0.960164	0	0.286723	0.344356	0.301067	1.51242	0.379817	0.361275	0.668085	0.221699	0.16968	0.207355	0.350614	0.332845	0.0056912	0.221339
LINC01166	0	1.17183	22.8229	0	5.40478	0.908769	0	0	0	2.56687	0.414526	67.7989	5.67582	1.83348	0	32.8034	7.95571	34.5651	9.32684	3.22852	1.76174	0
SPATA13	0.29626	0.168801	0.615116	0.681103	0.489838	0.560187	0.784441	0.842229	0.0914915	0.650785	0.632217	0.337399	0.732194	0.573797	0.303542	1.62455	0.382269	0.412981	0.389992	0.390326	0.569531	0.0735674
ADAMTS9	0.339506	0.858489	0.455547	0.203524	1.06561	0.993018	0.79638	0.207226	0.248736	1.08306	1.25309	0.489572	0.55694	0.835837	0.0674376	0.342574	0.174932	0.0712553	0.532592	0.621321	0.516284	0.156905
SNORD59A	0	0.346531	2.87523	11.174	3.53233	2.03996	59.0558	47.7706	1.98928	0.269706	0.134036	16.8427	3.51598	1.11969	12.7154	14.0721	0.514893	0	0.853251	4.94461	0	16.0875
TENM3	0.468477	0.418547	0.805553	0.590483	0.0771134	0.144673	0.423624	0.399519	0.622184	0.559422	0.422864	0.232979	0.352747	0.357544	0.167019	1.13072	0.97553	0.703415	0.605794	0.336876	0.183449	0.443212
CDK11A	0.399889	9.02521	1.06827	7.55766	0.892078	1.57401	1.58501	2.96734	0.595915	1.21492	0.722396	1.65956	0.959025	2.57813	1.17993	2.86267	3.14935	0.380154	3.40647	6.99017	0.276759	7.04758
NALCN	0.856237	0.23616	0.00608555	0.251536	0	0.0178509	0.05335	0	0.046453	0.182688	0.0589081	0.274742	0.228533	0.0369596	2.64713	0.322412	0.196158	0.157656	0.200377	0.122725	0.072134	0.348702
ATP5A1	0.0889883	0.174802	0.322445	0.0704443	0.970926	1.12108	0.469323	0.544434	1.44879	0.460443	0.611487	0.532059	0.639969	0.277696	0.256583	0.209406	0.257093	0.345873	0.244585	0.177825	0.219023	0.116148
ACTN4	0.0201894	0.495563	0.58062	0.508647	0.698681	0.881512	0.609899	0.177945	0.159954	1.02763	0.691575	0.49064	0.620193	0.552928	0.866245	0.277311	0.533422	0.848275	0.482408	0.310788	0.524266	0.243767
RPS6KA4	2.11833	3.08638	2.53074	2.08524	0.874463	1.05349	2.23508	2.9623	0.604561	1.20475	1.11411	3.81349	1.55241	1.30413	2.37452	4.10277	0.778627	4.2558	3.41289	4.96778	4.54532	5.91374
KDR	2.56056	0.267802	0.122258	0.495998	0.545923	0.110494	0.414332	0.312491	0.356215	0.686582	0.397859	0.907242	1.34081	0.210584	0.142017	0.553874	0.30524	0.249817	0.275272	0.234023	0.0389491	0.188283
TMOD4	10.3667	0.361805	4.937	11.1708	0.512188	0.995184	7.51121	6.65756	137.91	0.369766	0.481227	0	2.83251	1.66306	0	2.21771	5.82868	0.161883	0.717417	0.358266	3.49332	7.6032
MYO1G	6.80144	22.0975	29.2939	2.80794	0.370397	1.74368	1.74729	8.77617	0.432491	1.84982	1.78339	6.14079	8.74296	15.6715	7.20505	11.9762	17.6195	0.87148	4.80578	4.40072	0.513357	4.45704
PER1	0.152816	0.698009	0.264418	0.633791	1.03292	0.324096	0.895027	0.112424	0.51699	0.847823	0.314102	0.482065	0.31452	0.365504	0.581747	0.225729	0.565136	0.1773	0.267182	0.538322	0.308097	0.52434
LOC101928514	0	17.3038	2.56962	0	2.32278	0.721519	4.59494	0	9.25316	1.58228	0.329114	20.2152	2.08228	1.02532	77.9747	12.5443	3.55696	0	0	14.5	1.39873	0
EDNRB	0.0946395	0.507061	0.292153	0.945977	0.442944	0.0585679	0.205629	2.83038	0.0905221	0.9546	0.924227	0.639771	0.442824	0.0940129	0.198021	0.76365	0.284993	0.975724	0.12916	0.0501243	0.117822	0.25644
SNORD105	0	1.55647	6.58588	0	7.17882	6.39529	37.7259	79.6871	2.83765	0.349412	0.275294	17.0259	9.93176	9.64588	34.3588	33.5541	0.688235	1.93765	0	11.9541	0	65.3612
C19orf43	0.0572214	3.27601	2.23547	5.86482	1.27033	1.51012	1.70524	0.710412	1.6762	2.54872	1.49433	1.55972	2.49224	2.03691	1.2134	0.454086	4.43802	2.05903	3.6806	4.38782	11.5429	5.51158
PRRT2	1.20041	1.15877	13.3619	2.55366	2.03013	0.717502	2.08243	4.46649	2.12712	4.94939	2.81466	12.4778	1.36493	5.83294	33.7729	2.23832	0.386425	1.13693	0.59411	4.64726	0.902844	12.5347
SLC22A12	0.0127278	0.387674	0.151184	0.0630416	2.71889	0.0273964	0.831298	0.285441	0.0153965	0.00600929	0.0179532	1.71543	0.0093312	0.300185	0	0.64794	0.00315395	0.771597	0.0592531	0.00755827	0.232347	0
MIR4459	14.4689	93.5082	0.342379	19.9584	2.05656	0.728126	1.65711	0	0.611717	0.68704	0.246513	3.6703	3.85747	6.09663	0	0	0.385747	0	8.51839	6.90464	21.5356	11.2072
DIO1	0	0.284432	0.0186962	0.0795214	2.11342	0.0142091	0	0	0.056338	0.00785242	0.00847563	0.200424	0.414184	0.451701	0.358469	1.59242	0.251901	0.0228094	0.0220616	0	0.0275458	0
SNORD55	0.316859	3.85642	8.44957	1.6201	2.31579	1.80298	25.5996	20.6218	0.309214	0.29493	0.710367	13.4463	1.88083	3.20017	5.67509	2.57028	0.662889	2.89036	2.00677	6.58906	0.143039	10.3193
G6PC	0.205836	0.0194967	0.230433	0.0415676	3.7346	0	0.0894752	0	0	0.0049576	0.000810377	0.491184	0.0238346	0.0143008	0	0.283298	0.0475739	0.0151588	0.0248833	0.0103919	0.279437	0
SLC6A13	0.493338	0.214901	0.614061	0.37328	3.28476	0.0845797	1.50431	0	0	0.0760885	0.103445	0.96903	0.0121461	0.18688	0	0.200872	0.1785	0.01174	0.266107	0.285083	0.348324	0.227896
SNORD127	1.72707	1.03573	0.379854	4.85706	6.45498	3.00338	67.9584	61.7009	2.58807	0.76224	0.949634	1.0484	4.76083	2.30698	11.2715	6.34862	0	0	0.448227	13.3633	0	34.4502
TMEM190	0	6.75	571.318	4.09091	0	13.7273	16.5	0	0	3.75	14.7955	0	31.5455	3.68182	0	0	0	34.3864	7.27273	102.75	11.2955	0
CBFA2T3	2.62184	7.01733	10.4888	2.5025	0.162538	0.816351	0.481391	0	3.55754	0.522026	0.803539	5.10677	1.98633	3.67505	0	8.95717	7.60012	3.51214	5.18255	0	6.61574	4.50092
CENPN	6.2743	9.46205	16.0945	2.37662	1.75449	1.10988	2.19566	9.18364	0.964783	1.074	0.976562	2.65342	1.43914	3.59893	0	17.9818	0.300892	3.57216	3.56359	4.13432	4.63064	23.9772
SLC7A7	1.4494	0.410619	0.0341177	0.409029	3.14388	0.0775053	0.887828	0	0.0452526	0.0954418	0.0670835	0.565191	0.736328	0.111404	0	0.241786	0.0308266	0.0501892	0.114585	0.289452	0.0185947	0.0620372
SNORD36B	0	0	1.25649	0.876623	4.90909	2.625	156.536	129.896	1.30519	0.418831	0.253247	63.4481	5.79545	0.788961	24.2532	12.2094	0	0.891234	0.862013	3.48214	0.642857	23.9123
DES	0	2.64795	4.19337	3.14492	0.3344	2.15444	5.7657	0.651151	91.0619	0.190517	0.0131511	2.12606	0.162658	12.0183	79.3394	0.969891	11.3542	0.263713	1.46124	0.198218	0.452933	11.0971
VASH2	23.5238	11.5677	7.65911	6.23702	0	0	0	0	2.95391	0.31602	1.60424	47.0585	7.77542	3.13826	0	19.4221	8.29115	13.5582	9.50037	0.888808	14.3285	0
VIP	0	1.53179	9.93673	4.25656	0	0.78298	2.06707	0	3.07213	1.09902	6.41189	1.17874	3.95191	0	0	0	0.185068	0	1.48624	1.15312	0.629231	0
VTRNA1-2	0	1.65913	1.17391	0	4.01478	0.892174	0	331.169	0	0	0	138.037	2.57478	1.26783	27.9939	29.7157	1.32261	0	2.50435	0	10.6435	48.3104
ETNK2	0	0.0825549	1.48539	0.0807192	1.6437	0.192862	0.282436	0.717024	0.0409265	0.197344	0.140813	1.10593	0.0592841	0.0428703	0	0	0.203985	0.306409	0.00955672	0.0117704	0.466983	0
PTH1R	0.118897	0.563309	0.87962	1.01391	1.0936	0.429307	0.728689	0.54751	0.0174686	0.637852	0.146906	0.944228	0.472125	0.60146	0.204904	0.408012	0.309737	0.102367	0.269238	0.319325	0.726059	0.546764
KIF6	0.293459	0.615878	0.0123406	0.662526	0.144056	0.198684	0.199095	0	0	0.0493624	0.176717	0.132291	0.146524	0.117647	0	0	0.542081	0.356726	0.35615	0.188482	0.226409	0.809708
ZNF708	0.0880227	2.76575	2.44244	1.03936	1.50413	2.28304	1.50555	7.49006	1.05395	2.10854	3.20767	1.68147	1.90359	3.07731	1.47974	0.604543	0.697083	1.59486	1.82718	3.16662	7.94476	5.15436
SLMO1	0	0.223706	3.4606	10.4031	2.66469	1.28593	1.10484	0	1.46855	3.86236	0.791343	7.5421	1.67095	2.40446	0	0	1.51877	1.39246	6.58793	4.60348	7.96669	32.4664
SDC1	0.327164	0.131579	0.357401	0.30722	1.56864	0.998093	1.29264	0	0.00506147	0.385484	0.386844	1.04234	0.139021	0.175055	0.0448734	0.250297	0.0713517	0.20735	0.37521	0.145838	0.548301	0.0213602
AMH	2.47201	0	10.3774	0	1.85944	0.41321	2.63149	0	5.77406	3.79138	3.30568	3.31655	1.81232	1.37374	25.3218	0	0	8.11559	1.89207	43.8147	8.17358	0
FAM129B	0.435568	1.5696	3.09022	3.5819	0.817595	2.21438	1.92789	3.57762	0.291092	2.63872	2.54019	1.73258	3.09721	1.83856	3.31964	0.325028	2.59847	0.829501	3.50401	3.0062	4.29986	3.31964
BMP1	0.382124	2.24053	3.71681	7.02637	0.730265	0.779027	3.60593	2.94434	0.334956	1.83354	0.814159	3.20504	1.10991	2.04301	0.676018	2.77248	2.47292	1.05035	2.12363	4.64257	1.59929	6.05699
PNKP	0.483155	2.26617	4.94663	0.715204	1.346	1.71341	5.34431	3.53218	0.435388	1.32596	0.877482	4.07185	1.74278	3.03495	2.76871	0.424018	0.885825	0.932775	4.51427	4.72391	3.51901	3.81576
RECQL4	10.933	12.8277	7.87388	4.67486	0.143403	0.871358	3.7527	0	0.202015	1.06087	0.683411	4.02622	1.57509	1.86541	1.9459	18.4533	2.32961	2.78405	4.31576	15.4524	0.277819	11.8528
ARHGEF25	0.614729	2.5649	2.32208	0.582157	1.53346	1.23049	1.18775	0	1.22618	4.39599	2.80083	3.53	1.30184	4.0701	9.50012	5.06174	7.53875	2.04548	3.79057	3.11001	0.574574	1.48124
PRR36	4.75912	1.95157	3.37139	1.80921	0.814587	2.62566	1.12581	37.6664	0	1.35842	1.79293	0.748062	3.64959	1.31655	0	3.39279	4.44371	0.703866	4.11573	1.40727	0.102812	2.28419
GRIN3A	0.0794251	0.857035	0.0313666	0.0967221	0.0258699	0.00574887	0	0	0.0342915	0.0135653	0.0576399	0.70348	0.108472	0.0796773	0	0	0.144377	0	0.00892587	0.188553	0.436157	0
PDE4D	0.123274	0.113201	0.108533	0.245576	0.682937	0.548053	0.782389	0.236377	1.15521	0.75246	0.744409	0.362257	0.530921	0.459278	0.691961	0.16316	0.115943	0.989382	0.531076	0.279316	0.581794	0.457664
KLHL30	11.9966	0.142379	24.2647	4.76047	1.68844	2.54439	1.21608	0	39.928	1.47906	4.09213	0	0	3.93132	0	16.3819	5.51926	2.02178	7.25126	0	6.61474	0
LINC01519	0.312511	0.111242	0.0407978	0.0799637	0	0	0	0	0	0	0.018495	0.437353	0	0	0	0	0.0628286	0	0.0870354	0.110154	0.135177	0
GLUD1	0	0.10576	0.00517665	0.111478	1.79495	0.643589	0.569832	0	0.469189	0.569832	0.555908	0.628401	0.531429	0.400207	0.174782	0.247777	0.241256	0.526653	0.350326	0.24254	0.265032	0.0728342
APOBR	6.18696	9.67128	0.754033	1.88919	0.258186	1.29482	1.83453	2.15926	0.262939	2.03783	0.768293	3.21901	3.03212	6.50435	0	9.54792	3.86609	2.46389	4.64044	5.02113	1.55085	8.10618
ITPR2	0.163599	0.409374	0.0374716	0.298928	0.877677	0.906079	0.280061	0.0858189	0.296254	0.686784	0.85346	0.740464	0.87501	0.727914	0.271619	0.107593	0.347547	0.728798	0.489782	0.25865	0.606414	0.496619
WDR86	11.6494	11.7586	0.738328	14.9897	1.50158	1.00303	4.22936	0	0	6.63545	4.28634	6.91796	8.213	1.23569	0	0	7.82129	0	9.21723	3.59074	27.5211	5.82828
SLC22A31	127.689	10.1005	44.7603	3.20339	3.99879	0	0	0	2.9201	0.937046	1.50363	4.5109	11.0048	0	0	89.1719	17.8148	129.323	0	124.213	29.9855	0
LOC200726	0	0	1.30182	0.0818471	0	0	0	0	0	0.0391047	0.102309	0	0.265094	0	0	0	0.191886	0.144597	0	0.513363	0.0600212	0.514273
FTCD	0.710282	0.391167	0.0963834	0.18879	0.706858	0.0493792	0.335326	0.305748	0.014278	0.225548	0.0123448	0.359795	0	0.181306	0	0.506828	0.418867	0	0.0725223	0.190613	0.85251	0.0312348
HSPA12A	0.257305	1.02289	0.651307	0.29104	1.43442	0.646875	1.03996	0.493741	0.214445	0.963044	0.866242	0.646702	0.326647	0.607699	0.1795	0.405747	0.346105	0.669816	0.436201	0.198671	0.729314	0.0671255
ANKRD30BL	6.94959	6.66471	19.6284	17.687	0	0	2.55334	35.1489	0.942556	0.221571	0.03517	8.33177	1.49472	1.64947	0	11.1454	0.228605	19.959	4.11489	3.97069	0	61.6108
WDR43	1.17788	7.66944	1.46505	0.734769	1.22498	2.151	1.51443	2.59884	1.29371	1.31324	1.28744	2.28556	2.82761	1.52991	1.09847	0.731207	2.61652	1.15135	3.69731	4.10479	0.109196	4.01279
ROBO2	0.855085	0.147842	0.222985	1.07821	0.225707	0.157529	0	0	0.027631	0.403486	0.0781417	0	0.0361186	0	0	0.203335	1.93435	0.0856146	0.19969	0.172475	0.650735	0.226491
ZNF814	0.375237	6.88587	0.662742	6.16635	2.13445	1.84922	3.59172	2.90448	1.12305	1.68059	1.44778	3.88967	0.727117	1.95879	0.738891	2.67679	2.76092	0.990125	1.15553	3.71933	4.62229	6.22484
LAT2	0.571349	3.09802	4.04971	0.730522	2.70176	1.36722	0.60821	0	0.691148	1.35214	2.48227	7.88579	13.8313	1.32365	4.17202	0	1.6931	13.859	6.03854	2.53421	0.595644	1.95364
NEDD9	0.0126835	0.01326	0.00278963	0.0083317	0.723407	0.559414	0.370128	0.319004	0.161929	0.670888	0.898856	0.435759	0.453129	0.220027	0.0827776	0.501948	0.0141527	0.587571	0.164532	0.0695362	0.0511804	0.183037
GIGYF1	0.787341	3.56087	2.17886	2.50444	1.30235	1.55927	3.3444	0.775218	0.521868	1.54801	0.985659	2.95547	1.08741	2.35474	1.35867	0.329178	1.7706	1.22126	2.92172	3.85626	1.19681	2.76909
C20orf27	1.10169	0.103153	11.8549	2.79694	0.439355	1.32084	2.3937	6.79732	1.07182	0.990893	1.23506	6.12596	0.967275	0.815151	0.998881	0	1.14441	2.97164	2.50345	6.53788	7.77015	2.98518
HIC1	1.11261	1.62651	0.991283	0.441502	0.789174	0.846808	1.96424	1.36645	1.54044	2.96701	3.59478	0.905375	3.19786	2.47114	7.7179	0.307902	1.0236	3.81149	4.40803	6.35005	1.82799	6.02102
MAPK8IP2	16.4941	2.56975	1.04538	5.67731	1.42689	1.69076	1.22017	0	0	1.15462	0.707563	20.3429	0.840336	0	0	55.3294	0.388235	5.12269	11.1866	6.28403	17.2017	10.3748
ATP1B1	0.00639732	0.132631	0.140553	0.0526646	1.53485	1.28305	0.349683	0.10452	0.268901	0.360717	0.439932	0.335293	0.281294	0.233913	0.0463093	0.0885589	0.0350622	0.868197	0.229242	0.0854476	0.30656	0.13807
NLRC3	30.0667	1.93914	0.544395	3.53618	0.361733	0.455817	1.76917	3.88474	0.738788	1.20945	0.723706	3.79425	3.58023	5.09874	1.67245	10.2954	1.8654	2.95826	4.28191	1.65234	0.539847	3.879
TMA7	0.141284	1.50322	2.47782	2.00023	1.23135	3.43803	2.95823	3.40422	3.10235	1.80989	1.4924	1.71533	3.53468	2.63669	1.71975	4.98269	2.45679	2.72362	2.70456	6.73368	2.0322	4.76578
HSD17B1	455.498	5.05034	0.687593	30.1368	2.53983	3.32603	1.93485	0	2.37459	1.83092	0.218537	0	2.08676	0	0	0	3.40598	1.27658	25.1264	1.90554	2.65976	0
TRADD	0	0.946824	2.39321	1.48567	2.40325	1.02452	5.2839	13.3911	0.515805	1.36248	0.737075	3.3161	0.730281	2.22866	2.77548	1.03161	3.55214	0.27031	5.43545	9.24431	3.90222	4.37489
SRMS	160.109	5.57031	83.6016	9.01563	0	3.4375	0	0	0	1.45313	1.60938	12.5625	7.32813	13.5391	0	0	1.80469	59.3672	2.5	8.82031	5.55469	211.164
SULT1C2	0.0275404	0.925395	0.152946	0.560251	0.823071	1.30784	0.964321	0	0.00642369	0.291199	0.43125	0.402104	0.308385	0.6498	0	0.224278	0.0789779	0.00438633	0.239091	0.664085	0.109994	0.147961
SNORD57	1.80173	0.096505	0.800718	0.680542	3.33215	1.89004	49.8626	13.5917	0.405594	0.320014	0.671438	19.3224	2.93566	2.30428	7.91614	4.35593	1.09934	0.144757	1.19539	5.88362	0.154317	4.4802
PPP1R35	0.308071	4.4747	2.52103	0.675316	1.72194	1.13833	6.62939	0	0.66041	1.28062	0.88943	1.84346	1.82087	5.83121	1.88727	1.57739	2.18405	3.63722	6.61132	9.18566	3.24242	4.44579
PRUNE2	0.496203	0.449754	0.426662	0.351149	1.77346	0.255073	0.752175	0.116719	0.0520474	0.386044	0.39431	0.439069	0.0156639	0.886341	2.5341	0.884062	0.678415	0.721406	0.188059	0.200451	0.24234	0.152637
CACNA1E	0.493763	1.95861	0.51172	0.87212	0.286199	0.04799	0.274597	0.322609	0.0244021	0.0196981	0.0862779	0.555729	0.00744048	0.0819584	0.146616	0.824966	1.29141	0.15089	0.297393	0.037994	0.487069	0.139605
HIST1H1B	1.73013	0.221349	16.1133	1.73766	0	2.03882	0	0	0	1.34767	6.21131	6.14506	8.17032	0	0	0	14.3831	1.37778	0.481847	7.94596	1.0706	24.398
PODN	3.94383	0.187626	1.67916	3.88699	1.05207	0.788135	1.67653	0	3.63779	2.38598	0.847344	2.23809	0.620508	4.03383	18.3492	2.3994	0.86708	1.62574	4.8417	1.6039	0.357884	6.49586
PPP2R3B	1.1886	4.07364	0.954015	1.47917	0.624459	1.90203	1.36654	10.7577	10.9623	2.31223	1.35122	0	0.312562	5.7121	0	1.37121	1.98667	3.95501	6.31823	8.39487	7.72576	14.923
SNORD114-12	0	0	29.7884	0	21.2775	1.72717	295.491	346.172	8.58382	0	0	135.551	3.42312	0	58.7861	20.622	0.676301	0	0	0	0	51.0867
CEP295NL	21.1639	1.06593	3.55896	2.67828	1.01571	1.73608	4.52677	6.99952	0.92225	4.10972	2.35801	2.25224	2.04139	8.95776	4.75725	5.42707	2.78172	0.0608625	6.95462	8.1599	0.0439008	4.52444
PCSK5	1.26841	1.50359	0.264412	1.03609	0.784893	0.0949031	0.598904	0.228435	0.157235	0.298515	0.220686	0.803453	0.249212	0.709236	0.459293	0.213875	0.705579	0.119177	0.408824	0.0384001	0.794791	0.512161
MACF1	0.429478	0.321563	0.335583	0.22117	0.887927	0.985678	0.429478	0.145097	0.249075	1.03391	1.06955	0.438919	0.94435	1.06955	0.819234	0.806866	0.283636	0.507511	0.361963	0.179411	0.229217	0.233722
DGAT1	4.37026	2.0528	0.804553	2.48855	0.947156	0.953208	2.77855	3.16072	1.17461	1.00894	0.757775	5.4783	1.568	0.987882	2.6908	0.919543	1.59738	1.32541	3.64148	2.8421	1.09052	2.52701
GUCA1B	34.1743	23.5541	35.8483	8.19651	2.05984	1.0552	0.797997	8.27235	1.186	0.999145	0.715559	0	1.41463	1.43881	5.47386	2.17855	7.24243	6.79067	1.76856	2.5182	8.71861	8.10857
C1orf140	1.64492	0.103878	0.0524639	0	0	0.0398725	0	0	0	0.0433701	0.0720504	0	0.226994	0.056661	0	0	0	0.32003	0.0619074	0.0762475	0.0461682	0
PMS2P3	2.05464	2.46619	0.0689426	4.78896	1.40268	1.24185	3.41532	3.30947	0.513744	1.65795	0.998559	1.44403	2.12337	2.49845	1.28586	0.929949	1.90667	2.9826	2.25626	6.49933	2.10042	2.60851
RIBC2	33.3903	2.12089	19.0565	15.3311	1.44678	2.12484	0	0	1.78187	1.84494	4.30486	0	1.67543	2.70039	0	30.4967	0.910644	1.8883	6.34297	2.81866	0.871222	9.19317
ANP32AP1	0.614671	0.996238	0.990958	0.0279537	0.0569945	0.0938001	0	0	0.0930237	0.0807551	0.0613428	1.46182	0	0	0	0	0.0100944	0	0.0274878	0	0.0771832	0.563733
HFE2	35.4431	28.1664	30.4804	8.82316	0	0.42893	9.10535	0	336.943	0.323579	0.775084	18.6472	0	0	43.6492	0	12.3976	0.688545	6.05393	0.820234	14.8583	13.658
HEATR3	6.93528	0.195345	2.6379	2.66108	2.08705	0.81278	2.12646	6.68494	1.58173	1.19188	1.24435	2.36543	1.31642	1.88475	0.753776	1.53684	4.21035	1.19588	0.669063	1.62724	3.13964	5.88691
KCNT1	30.4901	7.27595	53.5043	3.72956	0	0.0957804	0	0	12.5212	0.409167	0.331871	19.6862	1.4199	0.193241	0	0	8.55134	15.7508	0.681385	7.08019	1.8946	4.12528
ARHGAP9	6.26961	10.1468	2.04313	2.71248	0.531148	1.46759	0.61034	0	0.353594	1.45498	1.01589	2.83102	1.71677	9.31702	1.25599	0	4.86507	0.564691	15.1834	2.12535	0.568726	5.05473
HJURP	30.5713	13.7504	0.673043	21.0078	0	3.82957	6.31304	0	0	4.24435	10.3017	4.19478	13.6904	0.782609	0	5.17043	3.33391	3.94696	0.834783	9.75391	0	2.95043
LOC100233156	0	1.3386	3.84502	13.1811	5.74881	0.236871	0.799853	11.0107	1.18876	1.01689	0.572898	7.46089	0	8.31142	11.5285	0	11.2134	7.35072	0.575101	3.33272	1.95887	6.80095
CYTH4	4.55696	0.961494	7.82329	5.02246	0.972038	0.884025	1.46023	2.01604	0.612881	1.56085	1.37749	2.15746	3.42769	5.09558	1.14142	1.13408	4.42127	1.74169	1.9019	4.13614	1.81802	1.41485
SAMD11	20.9299	0.100375	4.22154	4.22434	0.304857	1.08566	2.53942	2.47766	0.190676	2.08941	1.60563	0.595908	1.48511	3.57974	6.26356	2.81927	2.13848	1.69705	2.64129	7.16974	1.21812	4.39076
PIF1	41.1269	2.7854	13.0804	48.8716	0.652621	0.548261	4.439	17.8662	0.880451	2.17834	2.76335	0	0.483586	1.70799	7.98138	0	11.4532	0.704067	8.94415	1.05096	3.31455	7.21705
PKD1L3	0.663707	0.65793	0.606052	1.66485	0	0.00940143	0.0411171	0	0	0.0141588	0.0430993	0.0518211	0	0.0265619	0	0.141984	0.751038	0.105115	0.625535	0.063941	0.15586	0.132073
ALPK2	0.931973	0.320937	0.41328	0.274924	1.25326	0.320101	0.691998	0.784168	1.97999	0.111527	0.368378	0.522399	0.107532	0.586615	0.0515951	0.280636	0.341405	0.109609	0.567446	0.121552	0.297498	0.213607
ENPEP	0.0662992	0.329024	0.461561	0.0229544	2.91543	0.0342397	0.844125	2.6625	0.154939	0.752261	0.208694	1.25664	0.0820372	0.291974	0.146816	1.24209	0.4925	0.261911	0.0841561	0.300726	0.343503	0.0358059
C11orf54	0.045025	0.00483061	0.0518152	0.0437034	3.89441	0.311848	0.526332	0.445943	0.271904	0.297584	0.280312	0.943678	0.150683	0.211203	0.414384	0.301982	0.0291204	0.118806	0.176933	0.103015	0.197075	0
CLTC	0.0253777	0.244486	0.187213	0.130389	0.953603	0.759261	0.515587	0.244194	0.352962	0.674925	0.891393	0.636464	1.15418	0.319523	0.692897	0.549929	0.687945	1.04977	0.365099	0.278081	0.7532	0.10536
KAT6A	0.0753121	0.570498	1.0389	0.694108	0.566556	0.68822	0.336609	0.140233	0.705708	0.742475	0.707212	0.345555	0.571373	0.663044	0.396271	0.804574	0.539886	0.470315	0.815241	0.647069	0.505302	0.392594
PLG	0.197698	0.402302	0.00852076	0	4.36578	0.00577145	0.109783	0	0.00761831	0.00346287	0.0100108	1.46544	0	0.0166638	0	0.0526146	0.0268215	0.0141873	0.00371472	0.00849977	0.137025	0
UNC5B	0.705918	2.50218	1.22145	4.74448	0.858487	0.671967	1.30515	4.70322	0.204047	1.75079	1.71166	2.42558	1.96553	1.93379	1.0989	0	1.73885	1.69303	3.0518	4.9751	6.11367	5.108
PURB	0.201774	3.33218	0.654364	2.00806	1.09943	1.21692	1.01175	1.06181	1.12466	1.39296	1.40099	3.49204	1.52894	1.31795	1.23621	1.54733	2.47446	0.72479	3.68402	3.12599	4.47613	3.99763
HOXB4	0.697602	2.77629	0.233458	18.5103	1.86565	4.82397	3.70004	0	1.00115	4.07468	3.01731	3.75626	2.861	3.65592	0	0	0.0289932	0.467925	6.05	19.0415	0.995602	7.94641
STARD8	0.0403032	0.86587	0.00904981	0.518119	0.771093	0.651902	0.843877	0	0.356135	0.45242	0.412257	0.0145218	0.75166	0.408188	0.218739	0.122488	0.48876	0.943881	0.405838	0.106107	0.116946	0.568349
JAG2	5.40629	2.42545	0.831427	5.28845	0.883419	0.859136	2.33607	1.48885	1.95827	1.32245	1.18494	2.0782	1.24736	1.47351	0.663086	0	0.720292	7.85573	4.95653	1.5915	1.9678	3.67744
CTSB	0.498503	0.425009	0.587158	0.33149	1.12897	0.579665	0.5418	0.587158	0.273774	0.720421	0.633217	0.701124	0.858037	0.452893	0.414089	0.791224	0.549146	0.639883	0.32113	0.490428	1.2288	0.38495
ANKS1B	1.35287	0.0100156	0	0.322957	0.543821	0.071763	0.247131	0	0.331839	0.145747	0.109511	1.29367	0	0.171211	0.256533	0.770921	0.0603773	0.143998	0.204518	0.0191337	0.780795	0
CNOT6	0.51163	1.28908	5.75552	7.36732	1.69331	1.07099	1.59171	7.7984	0.938552	1.6164	1.56642	1.45304	1.00854	0.994938	0.726434	0.867355	0.938032	2.01551	2.50151	3.0619	2.43247	2.13807
SMAD7	0.287943	2.23654	0.331614	3.70459	0.999848	1.50026	2.87063	2.97621	0.819591	1.40904	1.39636	0.546663	2.59746	2.18843	1.48169	0.534554	2.44158	2.85698	3.01109	4.54266	2.89	4.14066
ITM2B	0.0095875	0.121211	0.0293911	0.134846	1.21379	0.838408	0.283464	0.688735	0.198701	0.682761	0.759668	0.31689	0.743469	0.275904	0.327305	0.84366	0.22561	1.42196	0.324357	0.23929	0.300623	0.0657133
SLC25A5	0.0171167	0.00213331	0.103102	0.0112438	0.797834	0.840902	0.241039	0	0.176864	0.341983	0.436576	0.124385	0.499572	0.329258	0.284634	0	0.271809	0.706052	0.0796856	0.26812	0.0446239	0.0283856
SNORD71	0.88362	0.41374	6.84363	3.86747	4.42733	2.74699	36.8944	28.8065	0.460651	0.553704	1.78262	13.5642	3.09997	2.05409	14.3871	3.3899	0.177647	0.244553	0.623686	4.68726	0	6.60984
ENO3	1.40902	0.0635153	2.93369	7.89208	1.03422	1.58249	12.2078	6.73292	201.282	0.613282	0.878728	2.82014	0.563249	0.392177	0	0.593808	0.019474	1.99893	0.951232	0	0.213016	19.5756
COL9A3	1.19338	0.348758	7.58126	3.53461	0.255079	0.120015	0.494733	2.83145	0.599323	0.225734	0.233634	2.54778	0.484199	1.36343	0	13.9447	5.4699	1.29947	2.92137	11.0869	6.21783	14.1155
SLC22A5	0.974932	0.651386	0.0897761	0.00921906	1.50174	0.22894	1.03639	2.37654	0.234522	0.284631	0.255029	0.584125	0.129036	0.454713	0	0.235682	0.0312946	0.163497	0.135746	0.264248	0.414199	0.0354652
RNU6-30P	29.9241	1.07595	3.26582	0	5.62025	2.10127	16.6456	111.342	0	0.417722	0.329114	62.7342	0	0	56.3418	25.0886	1.4557	2.31646	0	2.75949	0	14.3165
MYO1E	0.299281	0.952304	0.314449	0.35332	0.444092	0.694422	0.435369	0.400571	0.283271	1.13836	0.626339	0.0498412	0.967424	0.476284	0.394376	0.536518	0.490609	0.510318	0.545787	0.440971	0.643223	0.0963274
MBD3	0.275786	3.45388	1.1565	4.91414	0.977157	1.22659	2.68285	1.38622	1.30835	1.22897	0.868398	3.17151	1.081	2.89675	2.33459	0.703316	1.5439	0.541905	3.04407	4.59715	4.57069	2.09299
SLC3A1	0.137496	0.0680987	0.158956	0.0720596	1.82389	0.825885	0.999257	0.820366	0.02185	0.154297	0.745449	0.348091	0.596736	0.365915	0.0385703	1.70667	0.00511349	0.0773354	0.0261194	0.292946	0.293368	0.0797055
SLC16A1	0.0364975	0.654225	0.0941335	1.21169	1.46102	0.0480033	0.454399	0	1.90172	0.0870695	0.0863738	0.126778	0.317346	0.10869	0	1.39065	0.0034785	0.357055	0	0.530016	0.0181417	0
MSX1	10.1122	13.7096	14.9287	26.5209	0	1.88213	0	0	5.99715	2.0019	0.881179	32.6507	3.04563	1.6212	0	0	0.278042	2.04895	0.757129	12.9396	1.4501	0
RYR3	1.57647	0.822377	0.969978	0.839428	0.108232	0.0295526	0.173898	0.486604	1.13345	0.177145	0.0525351	0.182727	0.0643715	0.669671	0.130703	0.310848	0.701346	0.149944	0.209186	0.257222	0.271819	0.0838687
SGK494	1.49681	2.23474	7.44315	5.4442	3.59086	1.01191	1.75645	2.43311	0.649666	0.866072	1.09133	1.45928	1.10387	1.59101	2.05597	1.38323	0.738043	1.27738	1.40753	2.35683	2.31023	2.90009
PALM3	2.25577	6.42017	3.59586	15.0684	1.66768	2.36341	3.93775	0.542384	0.0685157	2.37398	0.60033	3.0721	1.05614	0.970816	0.307028	1.45723	1.61989	2.49265	6.94286	7.19749	1.56727	6.36371
POLR1D	0.367218	4.98509	0.381135	6.01021	1.81382	1.51183	1.45486	1.59143	1.79545	1.59245	1.13951	1.12299	1.29324	2.58203	1.55896	0	1.994	0.747054	1.70704	3.56539	3.56864	6.27268
MDM2	0.640112	3.30391	2.76912	3.82168	1.83501	1.18789	1.22798	3.25236	1.11292	1.33837	2.09054	1.8003	2.38986	0.972444	0.82641	0.590663	2.08719	3.22066	1.79343	2.02483	2.37225	2.25626
HMGCS1	0	1.2736	0.806424	0.0637077	0.535102	0.689748	0.451579	0	0.430016	0.41378	0.69256	0.288581	0.800799	0.421493	0.222146	0	0.565102	1.17363	0.44915	0.0304689	0.0302984	0.154688
TMC8	0.874217	4.69803	1.00681	2.93219	0.547274	0.53453	1.68912	0	0.0656827	1.58129	1.27003	4.56544	2.12317	10.3757	2.13493	2.45428	6.4994	4.99458	5.39064	0.916372	2.11974	3.62946
NRARP	17.8154	0.243088	0.295834	8.55052	2.4779	1.35992	0.832463	13.9374	4.22423	3.09594	1.9126	0	3.42158	1.3324	0	10.4551	0.483883	14.6919	9.51484	6.98879	15.146	5.63002
GADD45A	0	0.0415003	0.00700267	0.986589	1.1188	0.577313	0.783891	0	0.171782	0.372308	0.473331	0.255489	0.391199	0.242759	0.153353	0.103059	0.563497	0.567732	0.225225	0.734384	1.04399	0.733624
NFIX	1.55684	0.7881	1.59423	2.29108	0.959419	0.787599	1.31274	1.85123	8.6173	2.92794	1.07588	1.46047	0.715878	2.01421	8.67444	0.840792	4.25187	2.39145	2.05388	2.23972	1.82391	4.02491
TESPA1	0	1.45534	0.899881	0.568917	0.0860222	0.0426545	0.0625314	0	0.0392307	0.0432251	0.151454	0	0.107135	0.17233	0.185026	0.670298	0.0200671	0.0435104	0.0556363	0.470959	1.1025	0
RBP3	61.5395	1.06771	83.77	25.3279	0	0	0	0	0	0.433128	0.629547	60.9603	21.7068	0	0	0	0.579183	35.8842	5.89256	22.7694	108.468	11.7448
PKHD1L1	0.222264	0.260332	1.24208	0.404472	0.175594	0.0121339	0.238799	0	0	0.16331	0.0710132	0.533171	0.0668359	0.0745937	0.193421	0.273087	0.269283	0.129644	0.136283	0.0752153	1.32429	0.122085
ALDH4A1	0.216831	0.187681	0.358067	0.0474361	2.20771	0.226642	0.913262	2.73643	0.527441	0.145424	0.0970367	1.37615	0.0174371	0.0806718	0.160373	0.330091	0.243229	0.0877113	0.167857	0.290544	0.285365	0.149227
KCNG1	0	27.5648	18.251	1.53748	0	1.66822	0	173.991	0	2.44741	0.0889018	0	0	0	0	50.0413	10.5689	44.7438	40.6072	11.9808	1.77281	0
LINC01572	0.220661	0.563478	0.80473	2.20563	0.0965565	0.208348	0	0	0	0.108383	0.503304	0.0636522	0	0.230817	0	0.325843	0.922504	0.105252	0.501426	0.260104	0.15687	0
ACAT1	0	0.106363	0.141504	0.555597	1.5903	0.671341	0.268684	0	2.25591	0.272537	0.25806	0.261255	0.266883	0.453088	0.763303	0.150683	0.0612316	0.156641	0.182757	0.0102686	0.259505	0.0920375
MERTK	0.230562	0.424551	0.236984	0.246544	0.418227	0.608883	0.595254	0	0.0753505	1.15109	0.500245	0.285714	0.410481	0.257035	0.814443	0.201735	0.650113	0.862634	0.489019	0.258702	0.11055	0.361653
SNORD83A	0	0.272339	1.99288	1.43539	2.1723	3.99858	58.8797	60.142	2.42862	0.201851	0.845853	7.59025	9.90352	3.33535	20.7714	8.0324	0	0.58633	1.02528	11.9797	0	35.5226
CASP1P2	0.296356	0.0674448	0.0188043	0	0	0.0208101	0.0910129	0	0	0.0253232	0.0241949	0	0.0626811	0.164099	0	0	0.0394891	0.0600485	0.398025	0.0896339	0.062305	0.924797
ADGRB1	20.2293	3.50536	8.03928	1.61007	0.199963	0.142259	0.309719	0	0.0854967	0.380142	0.505914	3.50913	0.530645	0.853554	0.559615	19.123	0.235057	16.1059	3.33437	1.9848	3.32259	3.48794
KCNQ2	17.3274	0.989516	60.8177	1.08387	0	1.76129	0	0	0.648387	0.684677	0.544355	0	0.795968	2.81129	0	0	1.02097	37.3766	0	12.7669	0.534677	11.879
SNORD12	0	0.256296	4.99167	0.313832	5.00736	1.15072	48.6439	53.6827	0.632894	0.324293	0.240604	13.3082	1.36517	2.75475	8.68268	6.62011	0.200504	0.835141	0.308601	0.380085	0	8.56064
SEMA6B	2.1457	0.112843	3.71272	6.48367	0.52101	0.847375	0.973432	2.54947	0.910299	1.45543	1.59386	3.90715	2.48654	1.87597	2.61407	1.38894	3.32301	2.39195	2.96938	0.352374	0.14913	1.80277
KISS1R	0	10.1723	4.87815	53.7353	0	2.15546	13.7269	0	0	5.69118	0.983193	7.82773	0	3.06303	0	0	3.19538	161.773	3.34664	286.62	123.447	0
SLC52A1	73.9599	0	14.2993	81.646	0	0	33.0657	0	0	2.73723	0.186131	17.6058	0	0	0	307.018	8.33212	0	1.93796	0	103.303	80.7701
SAFB2	0.250842	1.09204	0.407956	0.533364	1.16499	0.736254	0.849618	0.478961	0.24184	0.680184	0.403166	0.6994	0.498426	0.772785	0.231018	0.603501	0.369115	0.318399	1.09204	0.926296	0.451557	0.529382
RIMS2	0.305392	0.704503	0.192699	0.962577	0.164356	0.124134	0	0	0	0.122978	0.121862	0	0.102807	0.11959	0.581844	0.186719	0.631553	1.00077	0.330785	0.149049	0.526553	0.0450853
TNFRSF1B	0.232168	2.34734	0.187109	1.50677	1.20812	1.17579	2.45342	0	1.21701	2.52778	1.84583	1.902	3.20125	4.45504	1.50839	9.0192	2.31602	0.452415	8.255	1.06628	1.90645	2.74884
SEMA4C	1.85095	3.30918	2.37124	2.50699	1.17687	1.20289	2.25952	2.24911	0.54221	1.965	1.30553	1.64966	2.16076	2.63997	2.82011	1.4146	1.05763	0.337483	3.92922	2.5732	1.22006	4.42183
AFM	0.568733	0.058965	0	0.646819	2.6808	0	0.334475	0	0	0	0.00194123	0.855987	0	0	0	0	0.0980809	0.0900733	0.127442	0	0.0484338	0
MSI1	1.00731	2.39684	8.58445	8.86411	0.594389	1.28697	1.64553	0	0.23495	1.18966	0.981882	7.45617	1.48159	0.696084	0	14.5415	0.202513	8.41087	2.78346	0.626826	4.58942	7.53507
ATAD3C	6.8678	4.59206	5.72547	4.64997	0.311318	3.27007	2.86323	4.3535	0	0.815662	0.70529	1.17251	1.27645	0.282611	3.08645	0	0.37665	6.85938	3.56753	2.23763	0.245985	0.559778
TELO2	13.5133	1.96317	2.0929	1.54922	0.895172	1.19641	3.62897	0.730016	0.504744	1.15448	0.625488	1.49619	1.123	2.2406	2.4842	1.91825	1.06201	1.87661	1.89122	3.03577	4.23123	3.33657
LOC101927069	1.31402	0.471131	2.7818	0.169637	0.0539486	0	0	0	0	0.0962842	0.0764394	0.134504	0	0.210208	0	0	0.355002	0.0269008	0.236521	0.444671	0.490094	0
GLG1	0.131032	0.372305	0.497629	0.151659	1.17993	0.966386	0.463541	0.558186	0.59943	0.939352	0.811451	1.00404	0.607983	0.627193	0.821154	0.387604	0.409206	1.01404	0.483758	0.264724	0.774797	0.192729
APLP2	0.0474744	0.25865	0.262209	0.176272	0.988478	1.60899	0.193364	0.480436	0.174874	0.693656	0.767694	0.377351	0.630777	0.220707	0.453091	0.352464	0.134374	1.13933	0.259181	0.232214	0.447799	0.137148
MPDZ	1.07346	0.58046	0.0579828	0.42683	0.596575	0.628225	0.511927	0.125037	1.14716	0.990975	0.815548	0.373267	0.731066	1.05196	0.959525	0.835551	0.53291	0.25667	0.439623	0.227811	0.119255	0.102558
ADCK5	20.0925	2.03432	1.38838	0.0872892	3.58856	1.19926	3.08955	10.5339	1.19441	1.36317	0.517916	6.3178	0.777359	1.13815	18.7313	0.961151	0.48397	5.09769	1.8098	0.547497	0	4.77278
KIAA1549	0.770061	1.18881	0.43405	0.547367	1.06255	0.135936	0.838293	0.168672	0.0790973	0.218114	0.155503	0.340993	0.081165	0.262048	0.110015	0.421159	0.700303	0.0925855	0.248199	0.250419	0.454879	0.359282
JSRP1	0	0.796992	139.075	0.676692	0	3.37218	0	0	234.079	0.620301	0.364662	12.0075	0	2.14662	0	0	47.6278	0	0	1.52256	12.5338	8.76692
BOP1	7.24233	4.00043	3.76502	3.0169	0.66504	2.26766	4.88617	2.26222	2.17711	1.40795	1.11459	0.363984	1.6875	3.35848	0	0.859482	1.89326	5.01383	3.31298	3.10382	3.19323	2.50963
NUDT16	0.423907	0.269472	0.992827	0.326146	1.47608	0.628849	0.333071	0.439666	0.822144	0.786539	0.422365	0.296194	0.360919	0.214927	1.12238	0.228973	1.32712	0.257237	0.511708	0.705908	0.287947	0.604061
GTF2F1	0.209956	3.19288	2.54055	3.73247	1.26528	1.82317	1.39829	1.39683	0.836484	1.90571	0.853331	2.26623	1.53264	2.05606	0.590486	0.25922	2.99427	1.73119	2.9476	3.43017	1.49767	3.63117
WAC-AS1	0.114332	1.21646	2.00514	2.25301	1.6703	1.59567	1.00411	6.30538	1.11446	1.73349	1.24601	1.57707	1.44254	1.23815	0.992968	1.31875	3.8852	1.48463	2.18863	2.81193	1.72165	2.22963
PPARGC1A	0	0.122371	0.43016	0.0252973	0.664549	1.42459	0.505722	0.636601	0.723651	0.414095	0.828058	0.282821	0.526733	0.371427	0.26735	0.225605	0.110316	0.0295311	0.6153	0.130628	0.284061	0.3104
MED17	0	3.61331	2.20621	8.70408	1.98645	1.98507	3.03107	5.49954	1.25708	1.44761	2.15382	1.03137	0.640573	2.16327	1.13692	0.432531	1.74566	2.9473	2.40344	5.7618	2.88608	6.23332
COL4A3	0.0920581	0.475238	0.377951	0.370536	0.765432	0.729455	1.21385	0.290519	0.443211	1.25443	0.552502	0.488034	0.259724	0.495602	0.0912482	0.111127	0.482716	0.474527	0.496655	0.426698	0.084904	0.348777
MED19	1.03728	2.61175	4.01154	4.485	0.789487	1.77803	2.38833	4.55661	1.17448	1.45377	1.17148	9.2118	0.667652	1.12463	2.43031	2.48242	0.0633539	0.839345	3.95118	7.3423	3.24229	2.76545
GRIK1	1.50998	0.0757877	0.578691	0.87339	0	0.0850851	0	0	0.0636729	0.0633912	0.01944	0.226518	0.110301	0.146645	0	0	1.09765	0.0952277	0.0735338	0.0307095	0.0477547	0
AKAP8L	0.135337	2.46527	1.83256	2.48685	1.24833	1.73328	2.52101	1.09107	0.634814	1.57886	0.981832	2.44976	1.19231	2.93637	0.870064	0.975099	1.91958	0.96071	2.56754	3.89277	2.2512	3.72509
RNU6-21P	57.9165	1.14009	12.4203	0	4.9225	3.68852	9.7377	117.979	0	0.442623	0.228018	66.4739	0	0	31.8689	33.6259	5.66021	4.26528	0	60.6393	0	82.7973
INSM2	99.3904	0	6.56272	72.1266	0	0	0	0	0	3.17585	1.02345	9.65416	0	0	0	29.9648	0.685815	12.7351	12.3447	2.30012	41.6659	51.8054
RNU12	0	0	2.27967	0.314197	6.85997	2.94647	35.6212	24.9001	1.04558	0.75931	5.88421	34.1881	4.11598	0.282777	20.25	9.95306	0.294996	0.836113	0.911171	1.24806	2.37393	1.9742
FMO5	0	0.270639	0	0.0248262	2.15397	0.350607	0.537985	0	0.108002	0.288541	0.195738	0.718186	0.0792074	0.607144	0	0	0.0842739	0.402286	0.315141	0.193458	0.0842739	0.0955048
SNORA26	1.23502	1.63249	1.67369	1.74121	2.56213	1.68512	24.1997	21.2847	0.373586	0.314726	0.910941	5.15854	3.54647	1.75264	0.995768	3.73482	0.263484	0.234054	3.45368	4.18527	0.0765177	6.93922
HSPA9	0.0190513	0.383051	0.706104	0.1285	1.13771	1.01245	0.406248	0.128037	1.30052	0.552025	0.697427	0.161743	0.723198	0.437293	0.250126	1.15827	0.462756	0.757675	0.223188	0.132202	0.150656	0.216034
DEFB1	0	0.941465	0.180482	0	0.154341	1.49192	0.0577734	0	0.0159481	0.293656	0.494391	0.0181887	0.327529	0.0628258	0	0.139227	0.00742487	0	0	0.0314129	0.449666	0.159481
LGI4	6.59194	1.17872	3.74329	3.20248	2.94163	0.495868	2.39721	9.69576	5.65754	2.60124	1.01705	18.1565	0.827996	3.80733	6.14773	0	7.19731	0.958678	6.4907	0.369318	1.42149	7.64928
FOXB1	28.1771	2.08447	22.7084	555.253	0	0	0	0	0	4.04632	0.416894	58.0954	21.139	0	0	0	5.66485	4.48774	4.3406	189.368	0	0
POM121L4P	177.845	15.4664	0	16.9412	0	16.6387	0	0	0	3.2521	0	0	101.647	0	0	0	163.286	6.92017	6.69328	8.2437	197.962	0
KLHL41	2.33674	0	0.14827	3.33904	0.621746	2.9061	7.30478	23.4939	416.341	0.580231	0.150247	0.409226	0	0.374629	7.55091	0	0.167051	0	0	0.706755	2.72026	42.1552
ACAP1	6.0501	0.220327	0.703537	2.39127	0.571018	1.58377	1.62686	5.38373	0.581253	2.94344	1.2794	4.11187	1.06015	17.1753	2.25067	0	5.48285	0.258036	7.33435	7.3866	0.182618	4.6301
RTTN	0.383945	0.155397	0.884125	0.3524	0.769993	0.446354	0.297323	0	0.741346	0.415434	0.641424	0.535022	0.134026	0.271348	0.332335	0	1.30661	0.486311	0.311533	0.0230196	0.371099	0.132548
SNRNP200	0.319703	0.736252	0.291092	0.231306	0.669298	0.88574	0.543313	0.141376	0.751635	0.729509	0.678717	0.382447	0.802915	0.730272	0.389639	0.276708	0.497172	1.06443	0.434278	0.529	0.532344	0.466224
LRMP	0	0.0112057	0.0819992	0.0841085	0.774378	0.340389	0.173358	0	0.242965	0.257467	0.236374	0.0545782	1.09025	0.629363	0	0	0.498059	0.628045	0.802194	0.0533917	0.604974	0.149101
LINC01271	0	56.0719	4.02734	81.764	5.14748	0.738129	4.70072	0	1.73525	1.61871	1.12014	0	0	1.04892	0	99.5892	70.1223	4.37698	0	4.6295	3.21799	23.5036
LOC400558	0	27.11	7.83271	46.9962	0	2.32613	0	0	0	1.70865	5.25282	57.282	8.54323	0	0	302.828	80.797	15.6992	26.8562	14.2105	0	0
SNX32	0	26.7376	12.6834	15.5269	2.2693	1.66415	5.7952	0	2.75094	1.96055	1.21955	1.27822	2.19828	0	0	186.098	2.34957	33.8974	1.61166	32.9835	38.4391	0
S1PR4	0	0	33.8294	0.840249	0	1.74118	0	0	1.25104	2.0306	0.242739	48.0996	11.0073	6.11048	0	89.4538	0	74.6888	2.43672	0	0	0
LINC00989	0	0.0578496	0.800156	0.0872614	0.185625	0.174718	0	0	0.0707051	0.607908	0.0268796	0	0.0973899	0.307752	0.919361	0.801519	0.19439	0.178224	0	0.589209	0.0660304	1.67413
CDH17	0.525746	0.0131592	0.25499	0.344869	0	0	0	0	0	0	0.0597128	0.0256976	0.0263804	0.0492848	0	0.216754	0.0793274	0.269142	0.0109867	0.428418	0.110363	0.610908
PAXBP1-AS1	0.11701	0.719732	0.491202	0.109461	0.463065	0.289609	0.415197	0	0.357378	0.216177	0.183236	0.850296	0.122157	0.684218	0.667575	0	0.648188	1.38147	0.0303677	0	0.898164	0
SNORD37	0	1.41631	2.15391	0.623317	3.90265	2.09157	68.918	90.471	1.56522	0.297807	0.180069	51.5933	9.64409	1.9773	23.551	8.68142	0	2.3409	0	10.4752	0	0
DBN1	0.114915	5.19805	2.52685	2.52685	0.833783	2.33758	2.26345	1.42383	0.480583	1.62646	0.806186	2.10934	2.16432	1.86199	0.996721	0.585293	1.70465	0.855444	3.38953	3.63076	1.05612	3.33773
C9orf50	40.699	0	15.2221	2.54423	3.84231	1.86058	0	0	0	3.61731	0.709615	128.934	0	0	0	0	1.4625	13.0933	10.125	14.5385	0	0
LMNTD1	0	0	0	0.0660928	0	0	0	0	0	0.0528742	0.0356167	0	0	0.172208	0	0	1.05124	0.443189	0.0649912	0.0800457	1.01049	0
TIGIT	0.531899	0.0786219	0.338132	0.0861189	0.130332	0.126872	0	0	0.0697794	0.068626	0.0371003	0.309105	0.165702	0.072855	0	0	0.191845	1.0909	0.224909	0.86907	0.191845	0
RNVU1-15	35.2354	0.506315	16.6498	0.619977	4.78071	2.08037	6.46498	0	0	0.296211	1.79104	38.6625	0	1.61538	11.1768	21.279	1.08496	0.63031	10.9357	0	27.3203	12.5029
FOXI2	29.9469	4.58358	3.907	56.8882	0.925165	1.12783	6.82516	0	0.416355	3.96639	0.0502075	0.253487	0.574325	1.63542	0	0	1.00109	1.62256	6.7627	7.40132	0	52.2231
DYRK2	1.83829	1.52624	0.495721	3.40965	1.69411	1.26012	1.50501	1.02487	6.30419	1.63699	1.85008	0.327541	2.59018	2.61838	0.619806	1.88198	3.39673	1.69647	2.25556	1.93038	3.4598	4.09539
LIFR	2.34402	0.0520298	0.307211	0.130732	0.709764	0.537895	0.331286	0.317714	0.646565	0.816437	0.848922	0.211496	0.59887	0.545704	0.660592	0.302325	0.135781	0.456693	0.314646	0.185067	0.714001	0.0589292
LINC01107	155.424	0	77.7118	7.76996	0	1.38836	0	0	0	0.767253	0	0	0	14.1516	0	78.1258	9.26793	0	0	20.4601	16.5629	244.084
CHMP4A	0.519589	3.15115	0.889801	6.99964	2.3188	2.46726	2.54225	1.17648	0.721655	2.00897	1.06664	1.07302	1.93229	2.05766	0.745808	0.243757	3.69189	1.27247	5.13451	8.49164	1.58646	4.85521
EDN2	0	0.108733	0.0948556	1.33347	0.0559679	0.231649	0	0	0	0.0998882	0.31278	0.888776	0.108581	0.0577979	0	0	0.308205	0.942151	0.178426	0	0.34389	0.74878
MYOT	57.756	0	0.41061	3.05252	1.16976	1.88753	15.2849	29.8743	488.41	0.321485	0.529973	2.55915	0	0	0	0	0.268966	0	0	0.644562	1.13156	35.661
ENO1	0.065424	0.150041	0.347413	0.28113	0.508029	1.08052	0.378643	0.701146	0.128699	0.435537	0.701146	0.142326	0.830342	0.38886	0.250302	0.295678	0.346537	1.06004	0.230723	0.296158	0.579823	0.13781
TRIM46	26.3796	1.56393	13.7742	1.48541	0.472397	1.376	1.69265	14.2504	0.344966	1.3258	0.940932	1.17777	5.18864	2.80092	6.41018	3.65561	7.6742	4.44594	0.227832	4.81279	5.90689	0
HIATL2	3.70526	3.18605	4.92382	11.5626	0.666317	1.24453	2.7109	0	1.38377	1.77121	1.67838	2.29238	6.85787	2.31913	15.3996	0	2.34509	0.730038	3.26393	2.3974	11.0465	4.83611
DDX20	1.66974	0.0312795	0.134525	0.668723	0.219645	0.486706	0.100568	0	0.670711	0.368241	0.539475	0	0.244882	0.502078	0.297576	0.242359	0.184694	0.115711	0.123053	0.466133	0.302011	0.0864965
OLIG2	0	56.3546	1.79283	0	0	0	0	0	0	0	0.478088	4.94821	0	0	28.3984	601.1	15.2749	5.7251	0	2.60558	21.251	0
TSIX	0.543016	0.907626	0.940472	0.45996	0	0.00305205	0	0.0720054	0.00256411	0.00325297	0.0143513	0.0226655	0.0306353	0.0735458	0.0519518	0.392557	0.219939	0.122589	0.257846	0.24668	0.142547	1.29716
FLNB	0.309985	0.244482	0.577193	0.422168	0.889925	1.15379	0.612705	0.165943	0.141928	0.899866	0.73419	0.525345	0.712961	0.902979	0.817001	0.377661	0.267798	0.756419	0.482591	0.286527	0.612705	0.450493
ZBTB17	0.668681	4.30556	1.20091	4.41772	0.563811	1.06072	1.25927	2.84542	0.926172	0.967954	0.744618	1.39075	1.06661	2.41872	1.39299	1.56551	2.65914	0.983954	3.63099	3.38867	2.0179	2.7175
ZNF580	0	1.20885	0.271217	13.538	1.78845	1.33013	6.39893	0	0.668074	2.55746	1.50249	3.86848	3.1057	3.37547	5.99065	0.520629	1.36834	2.08397	9.98373	10.3382	3.93535	6.29946
TRIM72	10.3432	4.05591	2.72144	12.4346	0	1.39572	15.5892	0	210.658	0.962567	0.297521	29.6296	0	6.25668	0	0	7.15362	2.09577	0.774429	7.35051	5.95041	0
GOLGA6L10	7.88931	16.5424	0	29.1011	0.428627	2.4211	0	0	1.26019	2.09642	1.82896	0.483519	0.583961	4.23255	0	2.92798	8.43122	3.09499	0.947184	35.8926	0	8.61575
PGAM5	1.50009	3.45459	1.61891	4.6531	1.1214	1.44146	2.26518	9.37674	1.39989	1.19683	0.920572	3.96204	1.03015	2.0764	0.977671	0.989566	1.60407	1.06346	1.75858	2.94463	16.6376	2.80482
MECOM	0.600084	2.8643	4.34398	5.29189	0.468789	1.80099	1.63503	1.32692	0.175832	1.46123	0.925033	2.26658	0.956129	1.24179	0.157568	0.506463	2.83919	2.56979	2.83919	2.17069	4.40307	2.06995
DMRT2	0.981704	14.645	0.220515	5.6759	0.252613	0.838401	4.28546	2.86411	0.208194	1.25359	0.0314661	3.9006	0.937791	1.47215	0	2.34195	5.79772	0.141471	3.771	6.31148	7.19215	8.22428
YIF1B	8.62656	2.80125	1.9769	2.13619	1.72233	0.860443	2.78393	4.23292	1.08999	0.985082	0.525505	1.53705	1.98027	3.54716	0	12.5053	4.89798	0.580847	4.80029	1.79933	0.654475	7.12656
PTMA	0.48449	2.4459	2.04488	1.42032	0.750054	2.85505	0.98809	0.95726	0.346297	2.16087	1.24934	1.47263	2.4459	1.94597	1.15587	1.0486	2.55769	2.62445	5.02497	2.62445	5.52948	2.2108
LYPLAL1-AS1	0.390329	0.0758934	2.49701	0.0414734	0.0517712	0.102696	0	0	0.189875	0.0424608	0.0702508	0.0584013	0	0.0228527	0.852602	0	0.0444357	0	0	0.0571317	0	0
DNAH11	0.889589	1.02308	1.4286	0.576755	0.27119	0.120904	0.0158957	0.562042	0.0148885	0.117597	0.443525	0.206097	0.0588534	0.0476433	0.0914768	0.928956	1.05089	0.176298	0.445692	0.233903	0.157161	0.0510589
NFATC4	3.63686	1.27752	1.62439	1.94354	0.477	1.14619	2.02517	2.67917	0.288071	2.38818	2.00637	1.51401	2.45144	2.56801	4.7318	0	2.27633	2.30981	3.69892	3.85094	1.84869	3.66072
FARP1	0.171017	0.420846	0.143434	0.822851	1.49368	1.04216	1.17362	0.513473	0.149001	0.683364	1.30513	0.670852	0.620467	1.04216	0.599423	0.5219	0.388927	0.320634	0.4289	0.604544	0.556671	0.152104
PBLD	0.34096	0.157148	0.0435282	0.336993	2.27393	0.752111	0.336327	0.250837	0.0851232	0.286933	0.237139	0.943588	0.533403	0.575432	0.434715	1.21579	0.0104988	0.350358	0.0270301	0.379955	0.656356	0.0777241
TDRD15	0	0.140273	0	0.0677909	0	0.11016	0	0	0	0.0407048	0.0292046	0	0	0	0	0	0.0850413	0	1.17499	0.170839	0.0752055	0.742976
MINA	0.0316643	0.0430393	0.496833	0	0.383129	0.540011	0.140214	0	0.706226	0.389025	0.476915	0.69174	0.511829	0.243425	1.04706	0.509925	0.532165	0.221186	0.463125	0	0.213061	0
TIGD3	1.17593	0.901319	0.0850549	0	0.349451	0.0708791	0	0	0	0.0108791	0.031978	0.136484	0	0.471429	0	0	0.0214286	0.104835	0	0.0718681	0.329011	0
FYB	0.295455	2.70329	0.724202	3.17416	0.482262	3.74771	0.10859	2.41322	0.104251	1.10921	1.39217	2.153	2.62241	3.17722	0.586628	2.94332	5.15556	0.199824	12.973	3.86671	4.42089	4.04779
HIPK2	0.768887	0.341748	0.590541	0.344081	1.69065	0.943563	0.328399	0.497842	0.307818	0.883154	0.925599	0.387654	0.631615	0.465189	0.106719	0.590541	0.494781	0.713412	0.502107	0.351269	0.701116	0.274305
CTSH	0.0691085	0.238199	0.0363948	0.0139561	1.38609	0.888152	0.985188	1.03487	0.123973	0.204253	0.421853	0.777895	0.765347	0.605188	0.0460297	0.391604	0.202764	0.919217	0.71418	0.325457	1.09949	0.0785833
GNG12-AS1	3.89813	0.0323892	0.0571574	0.17071	0	0.230154	0	0	0.411152	0.114696	0.100597	0	0	0	0	0	0.0643973	0.182523	0.445828	0	0.270926	0
LOC388849	299.908	27.5308	21.2212	3.54692	4.42761	0	8.75871	0	4.37936	2.24397	1.66488	0	6.03217	2.7748	0	0	6.78016	68.4651	52.2265	0	2.66622	0
SGCA	27.0048	2.22896	0.620358	0.70692	2.42372	2.03179	0	0	108.767	0.774245	0.745391	9.81272	2.42853	2.19049	13.5854	50.4053	0	1.15175	18.6709	4.03954	6.61715	0
CD5	7.04042	1.06737	10.8488	18.9042	0	0.806886	0	0	0.896707	1.49102	0.464072	0	0.872754	6.91766	9.0479	7.01198	5.65569	1.36976	6.48054	10.3323	12.9476	1.69311
FNIP2	0	0.761891	0.112966	0.240452	0.865315	0.938958	0.832014	0.821069	0.390103	0.578609	0.860146	0.461326	0.774981	0.904667	0.746904	0.291106	0.247355	0.131006	0.183034	0.416859	0.23784	0.169752
DMRTA1	0	0.170199	0.0474533	0	0.853844	0.496678	0.229674	0	0.935463	0.485922	0.760835	0.130971	0.247706	0.0949067	0	1.3945	0.315723	0.100601	0.0559949	0	0.157229	0
EFHC1	1.02873	1.22975	0.27741	0.066225	0.443891	0.702536	0.395514	0	0.169694	0.693928	0.977249	0.438038	0.54914	0.265187	0.707012	0.341053	1.02689	1.11056	0.349202	0.259448	0.129408	0.281772
HILPDA	2.71009	18.7747	4.73457	7.88737	0.719882	0.477963	5.12341	0	1.37316	1.20372	1.06954	4.85406	2.52595	2.77179	9.36533	0	0.112635	2.98531	2.04603	0.700294	0.977473	10.859
CGNL1	0.0144362	0.865164	0.382194	0.546058	0.994199	1.73913	0.621806	0.301479	0.0157207	0.48784	0.383675	0.462099	0.48784	0.430546	0.0681699	0.589033	0.388627	0.287282	1.38282	0.615901	0.53266	0.313105
VWA5B2	63.697	0.308607	11.7166	4.02659	0	0.348495	0	0	0	0.302309	0.883835	1.92092	1.49475	2.18544	0	18.5794	11.3387	4.70049	0.371589	11.0784	29.6158	10.3079
FIZ1	0	0.756265	2.03188	2.74808	2.20598	1.24643	6.2539	18.5273	2.20647	1.13464	1.27957	6.89987	0.426357	0.450594	2.89201	0	1.62975	2.14465	7.23917	6.39289	6.15795	6.08128
SNORA11B	6.62693	0	1.70827	1.88499	2.85273	3.06311	68.1038	0	5.12062	0.69425	0.168303	20.8527	1.78822	1.97335	13.6536	14.6928	0.71108	0.769986	0.744741	1.70407	0	9.81206
SLC16A12	0	0.0181755	0.184738	0.257746	1.56916	0.687305	0.482149	0	0.0433613	0.145353	0.478503	0.148565	0.146067	0.14283	0	0	0.259454	0.353289	0.110353	0.0182265	0.166435	0
SART1	0.609623	2.76788	0.411677	1.95275	1.00877	1.14637	1.29377	1.71041	0.996437	1.52184	0.808358	2.94202	1.17218	2.20891	1.70008	1.11437	1.95591	0.942273	2.43053	2.81962	1.95111	2.37893
GHITM	0	0	0.00956292	0.0669404	0.756625	0.753822	0.162334	0	1.53819	0.326929	0.421098	0.0752314	0.478452	0.0706619	0.452755	0.134305	0.373166	0.701932	0.195451	0.425055	0.311125	0.0549279
KCNE1	0	0	0	0.244491	1.80109	0.292031	0	0	0	0.661485	0.48355	0.56233	0.881527	0.220042	0	0	0.573196	0	0	0	0.179294	0
RNA5-8S5	3.31729	3.831	5.85898	1.07107	3.23839	1.68886	17.7902	20.4057	2.35367	1.54952	0.209849	3.97706	6.10576	0.503637	6.53218	5.32009	0.70845	0.307219	1.3615	1.20034	0.56911	12.3844
CDR2	0	6.93474	0.848665	7.92449	1.16412	1.2391	2.92246	3.20429	0.254505	1.45781	0.911105	2.25414	1.21117	1.96363	0.537483	0.192539	1.65442	0.650431	3.29819	5.71741	4.08943	7.39907
SNORA67	1.98585	0.107173	2.21785	0.804427	4.35248	2.88862	52.023	34.9068	1.84337	1.20664	2.96049	6.24881	7.47688	3.78257	16.922	0	0	0.230737	1.02256	6.65354	0	6.19081
WDFY3	0.773778	0.416838	0.0745348	0.276681	1.50817	0.783201	0.842414	0.38467	0.336891	0.823361	1.24026	0.937858	0.791848	0.889729	0.692674	0.208213	0.324293	0.52558	0.450185	0.360929	0.383901	0.278691
ATP5B	0.00848783	0.0522089	0.0356315	0.0691472	0.881714	1.03446	0.901913	0.36372	1.73987	0.489096	0.501479	0.231835	0.628075	0.410403	0.0703171	0.730924	0.294573	0.260323	0.228985	0.0961041	0.224915	0.0768261
PLEKHM2	0.407862	2.51454	0.369703	2.17606	0.98402	1.01723	2.94084	1.15404	2.26772	1.62176	0.999648	2.44714	0.887728	2.51745	1.23445	0.219016	2.73033	0.633142	3.12036	2.99255	4.09907	2.25858
RIPPLY3	0	92.4718	6.19934	2.93023	0	1.13621	7.23588	0	0	2.01329	2.63123	0	0	0	0	240.568	2.30233	12.0299	0	16.7442	45.7375	48.9369
SPC24	0	3.40203	0	32.3484	0	10.3808	15.6128	0	6.86229	14.9307	9.50739	0	14.8142	3.1525	0	53.3595	1.40573	59.2652	26.4094	0	0	0
ADAMTSL4	0.268179	3.63734	9.46961	0.788434	1.71831	1.12173	2.95114	0	6.70939	1.07645	1.98952	2.40498	4.27547	2.94017	4.44212	2.06561	2.37557	0.1118	4.42554	2.49344	3.08301	4.3812
NOTUM	0	5.0625	22.4345	6.30218	0	1.17415	0	0	27.7045	0.677184	3.99211	22.287	0	0	12.9757	0	0	36.4369	14.341	12.5115	0	12.7354
SNORA23	0.19151	1.87723	2.7059	2.6379	3.67192	1.38675	22.3186	12.0248	0.221318	0.486044	3.14231	7.10656	10.2015	0.804644	4.70314	1.15179	1.07988	0.327884	0.710986	3.07552	0.0202383	6.16404
HADH	0.376983	0.048794	0.0327399	0.0335821	0.856712	0.497415	0.531155	0.582739	2.70662	0.266551	0.502363	0.306766	0.174911	0.114537	0.52526	0.104326	0.313819	0.351191	0.465675	0.196808	0.241549	0.122748
FAAP20	9.20534	1.29517	2.81299	5.07416	0.994618	0.952181	1.69497	5.54613	0.698117	0.987917	1.37153	1.94736	1.25971	2.26898	1.35352	0.396451	5.00799	1.40084	1.54183	2.11613	5.2527	2.26187
SNORD74	7.24675	0	1.59386	0	3.89965	1.21133	25.7143	199.456	0	2.33766	0.180638	33.9386	3.49587	2.44392	0	30.1771	0.690673	1.94451	3.40024	0	0	0
POU2F2	6.96995	5.37682	0.431308	2.04756	0.417768	1.3712	0.997358	3.30053	0.576618	0.975892	0.968626	0.782365	3.81473	4.26321	2.30713	0	2.57332	1.43197	1.63111	1.23481	1.51552	0.770145
ARHGAP32	0.362826	0.603255	0.189493	0.534434	0.726437	0.54654	0.494558	0.289482	0.363741	0.537415	0.740269	0.316492	0.450133	0.581317	0.506168	1.1094	0.364343	0.796408	0.506796	0.690117	0.807155	0.128385
RCAN1	0.0227439	0.0309143	0.161208	0.0639629	0.570864	0.717432	0.802305	0	0.564061	0.573666	0.440837	0.528545	0.468017	0.483591	0.405755	0.326151	0.74231	0.30334	0.404387	0.28103	2.77458	0.121056
ITPKA	5.974	19.227	25.1334	7.77296	0	0	0	272.329	4.28943	2.93761	0.649913	0	0	0	0	14.766	8.50087	17.9584	6.08319	0	1.14905	0
COL6A3	0.264958	1.26673	1.19752	1.37217	0.358675	1.46177	0.76681	1.46177	0.970296	7.44856	4.97597	1.16456	4.6148	3.97608	4.884	0.278052	1.95614	1.06369	1.57496	4.17054	2.66763	2.58089
EGR1	0	0.334711	0.53119	0.967577	0.0159458	0.22986	0.220774	0.18285	0.0587286	0.342699	2.49398	0.0241894	0.263301	0.164166	0.134952	0.0525308	0.39893	1.99653	0.0176005	0.283173	0.633859	0.148055
LOC101928911	0	0	0.303388	0.134507	0.792096	0.124045	0	0	0	0.0470774	0.0508137	0.309366	0	0.121056	0	0	0.315344	2.27765	0	0	0.165144	0
MAGI2	0.799155	0.527068	1.58967	0.332716	0.317594	0.419834	0.482021	1.39174	0.319152	1.10329	0.437223	0.659694	0.349006	0.238054	0.258983	0.0701908	0.864211	0.566626	0.274991	0.536842	0.499587	0.128553
MED12L	0.0636732	0.658199	0.166076	0.685973	0.11348	0.0838061	0.233873	0	0.124759	0.0496853	0.0652499	0.380544	0.0171817	0.127387	0	1.42167	1.45033	0.0369911	0.591696	0.0926193	0.7661	0.810247
MEF2C-AS1	0.889888	0.773626	1.00034	1.23694	0.0394656	0.0361396	0	0.436654	0.56066	0.147338	0.110404	0.0454227	0.348241	0.148927	0.309569	0	0.9576	0.00908454	0.574361	0.30257	0.0675135	0.115766
MB	8.6142	10.02	6.41652	8.67824	0	4.03297	0	0	766.082	0.134328	0.0265533	0	0	0.591982	0	0	4.47188	0	0	0.340507	11.2117	68.3263
MRC2	0.367818	0.699303	0.402917	1.49567	0.484842	1.10243	1.2843	4.56557	0.614457	4.12969	3.57515	1.74659	2.0238	1.14514	4.14261	1.09675	1.63994	2.46149	3.36768	3.21897	2.9411	1.54382
GMIP	3.42605	3.778	0.74345	0.825908	0.373923	1.28309	0.696827	1.76904	0.204745	1.62304	1.7091	2.72856	1.04504	3.67423	1.0176	1.3028	3.25075	2.05798	3.00417	1.91331	3.98527	3.44897
LINC01187	0.35782	0.0286564	0.200595	0.104746	0.701626	0.395444	0.211595	0	0	1.06057	0.0233315	0	0.0548605	0.253914	0	0	0.0699244	0	0.581396	0.0152741	0.0348221	0.079243
CTNNA1	0.176351	0.483376	0.25591	0.150372	0.814802	1.03377	0.34858	0.281839	0.427212	0.889484	1.0557	0.552102	1.06686	0.463504	0.451339	0.192243	0.413285	0.957121	0.427568	0.391214	0.589698	0.204031
PCSK1N	0	0.208266	0.0409023	0.028181	0.5687	0.701037	0.670956	0	0.0118378	0.211049	0.396743	0.0710268	0.181763	0.240643	0.414986	0	0.0186401	0.777231	1.59179	0.437469	1.62584	0.379649
CBR1	0.202183	0.00750907	0.047302	0	0.280849	0.967546	0.29551	0	0.454018	0.504895	0.419435	0.163156	0.482572	0.153246	0.685573	0.101245	0.220572	0.0162441	0.0266649	0.0206882	0.441809	0.0577738
PPARA	0.106341	0.290985	0.737445	0.646683	2.15097	0.767835	0.488088	0.888602	1.3073	0.449558	0.471514	0.29458	0.213609	0.406936	0.189641	0.243908	0.328746	0.128319	0.394793	0.11932	0.697988	0.250692
HRAT56	0.782334	0.68925	1.99085	0.674535	0.0206916	0.0155046	0	0	0.0151099	0.00355196	0.0280774	0.0906597	0.0185491	0.0129675	0	0	0.0237925	0.017929	0.117779	0.254896	0	0.131479
SNORD36C	0	0.250491	0.760314	0	3.52161	2.49018	87.9902	98.0481	0.789784	0.365422	0.40668	4.7387	6.63949	0.884086	17.8114	10.2908	0.498035	0.539293	0	8.91454	0	10.6974
SNORD14A	0	0.234533	2.08367	0.469066	3.17018	2.50488	40.855	43.4492	0.955682	1.6162	2.57508	2.5655	3.29303	5.54104	8.66336	6.56533	0.89665	0.507357	1.86669	3.6552	0.210601	9.84879
EXTL3-AS1	0	31.8608	1.13924	14.5671	2.78734	2.83291	27.0608	0	5.16456	1.53418	0.129114	17.9924	2.49873	0	0	0	1.28354	36.1823	2.43038	0	65.6886	0
TMC1	2.55342	0.813553	0.0211888	0.071615	0.413182	0.0176574	0	0.61809	0.0886153	0.0591316	0.0830307	0.335161	0.0643057	0.258783	0	0	0.592877	0.152428	0.995875	0.371297	0.146022	0
PRSS56	143.204	5.85325	0	30.8282	0	0.823054	0	0	13.6359	0.126329	0.788601	1.58486	0	0	19.9562	0	53.3416	42.0293	1.22501	8.77031	17.5674	0
SHANK2	0.166034	0.346437	0.304918	0.807156	0.958312	0.870669	0.680288	1.14944	0.00525349	0.478734	0.864141	0.751289	0.630753	0.762502	0.379467	0.564947	0.176325	0.232663	0.641475	0.353748	0.30631	0.0962487
TNNI1	0.471871	1.41262	6.03725	2.81475	0.415846	1.08425	12.2078	3.9787	167.693	0.347537	0.0455393	2.5481	0	0	1.56182	2.38093	1.61814	0.095273	0.482057	0.686385	4.22646	15.8222
KIF26B	9.95945	3.04916	8.9978	4.9083	0.192705	2.09763	1.91032	0	0.0399496	2.44232	5.56169	0.0455624	0.982232	1.66776	0.261488	0.348761	6.47712	1.41012	2.59441	4.16356	0.951857	3.46879
CHTOP	0.0799354	0.552633	1.25424	2.7396	1.61277	2.34086	3.70891	3.42538	4.27842	2.32399	2.47214	0.894644	0.991222	3.50649	2.48104	4.92482	0.506101	0.310599	3.10142	2.79879	1.65344	2.89326
PLXDC2	0.154665	0.226373	0.0429177	0.213344	1.08402	0.420491	0.772079	0.34805	0.491614	0.909713	0.891951	0.142197	1.46686	0.554734	1.13611	0.167206	0.631956	0.278245	0.811776	0.567031	0.00539216	1.166
LOC284023	5.88818	0.972273	7.61045	18.1745	1.725	3.92318	2.55955	0	1.99364	3.06818	1.78091	1.24773	0	4.09091	16.995	0	0.575455	2.53091	8.29773	20.6714	3.075	8.41773
GNAI2	0.0517848	1.05436	1.13775	1.91035	1.07294	1.21016	1.29218	0.946331	0.822792	2.12779	1.33818	1.27376	3.98374	1.79006	2.0595	0.543295	3.54514	4.5736	2.60743	1.76186	4.93827	1.79371
SNORA27	0	0.363364	3.25193	6.09717	7.0466	1.82039	41.7751	14.109	0.520838	0.435221	2.44468	9.49332	7.2795	0.80521	9.0316	3.14847	0.058607	0	0.266025	8.76048	0	14.8429
LPIN2	0.441026	0.36616	0.382693	0.760516	1.01412	0.694581	0.803275	0.705504	0.0941295	0.685084	0.753651	0.12193	1.1053	0.768511	0.324754	0.10124	1.13551	1.15706	0.415513	0.443979	0.830043	0.151872
METTL7A	6.04744	4.91651	6.14499	2.69113	2.21585	0.368973	1.97932	2.97812	0.702825	0.613407	0.241423	4.55265	0.334598	0.546012	0.534904	1.70582	1.82215	1.76321	1.75442	1.67545	5.91263	2.90508
AKR7A3	0	0.0153095	0.29817	0	1.1706	0.123517	0.483342	0	0.0708194	0.12081	0.054156	0.167467	0.0675909	0.164551	0	1.78142	0.0585302	0.0190588	0.0184339	0.634771	0.103938	0
PACSIN3	3.18004	2.79816	1.2606	1.59091	1.92971	1.50458	2.78631	8.02665	16.8038	1.18809	1.01385	2.0356	1.96863	2.39021	2.88351	1.44077	0.477095	1.03005	1.74777	4.45308	0.906579	4.21463
TRIP12	0.512557	0.611434	0.262999	0.546351	1.06072	0.887224	0.572784	0.318064	0.921487	0.866279	1.1159	0.317853	1.20063	0.702701	0.866279	0.354333	0.668869	1.00185	0.356589	0.475905	0.427925	0.418183
FOXE3	157.185	20.5082	5.4456	15.4784	0	0	0	100.945	0	1.39493	0.912072	0	14.7273	0	31.8689	0	2.26677	159.197	10.8778	9.59016	4.54694	0
CALR	0.236747	0.301787	0.326253	0.329142	0.824938	1.24217	0.482635	0.667881	0.212353	0.608638	0.513218	0.4286	0.894827	0.459618	0.538274	0.198654	0.338408	1.0333	0.564404	0.36996	0.279524	0.241767
CXCL14	0.168883	0.0320137	0.0476123	0.0929424	1.64541	0.562302	0.427275	0.949084	0.0942196	0.173867	0.295012	1.35978	0.427108	0.479934	0.0497479	0.401229	0.0791026	0.8753	0.554032	0.34654	0.260674	0.0760038
CWH43	0.419267	0.189802	0.468248	0.307196	0	0.490343	0	0	0.0966311	0.385992	0.112071	0.428052	0.342601	0.348458	0	1.51788	0	0.49407	0	0	0.189269	0
KCNN4	29.0851	0.890206	19.369	0.391778	1.73035	0.957678	0	77.3739	0.583313	1.45828	1.82394	22.4271	7.48513	6.15961	0	51.8474	3.55865	4.87328	1.76518	13.266	2.17219	0
HAGHL	1.84892	0.341141	0.415162	0	3.78473	1.17146	13.6633	82.2567	0	1.51421	0.201144	2.58752	2.07098	5.07045	0	5.09941	3.2521	4.9047	6.00536	4.86769	0.545503	11.8707
MAST4	0.691078	0.757094	0.437905	0.891399	1.24449	0.557271	0.810184	0.400594	0.272883	0.346569	0.447398	0.78187	0.235619	0.703164	0.299161	0.278931	0.288863	0.310702	0.457223	0.531052	0.542155	0.237241
NAT1	0	0.277849	0.0262198	0.564641	0.146445	0.0379069	0	0	0.0459355	0.0273377	0.102745	0	0.0723585	0.0580291	0	0	2.40541	0.269312	0.322666	0.0221547	1.34239	0
AFF2	1.11906	0.450065	0.935788	1.84755	0.334367	0.0620155	0.264922	0	0.0386951	0.112403	0.0242248	0.320155	0.206848	0.0302972	0.231072	0.302584	0.278941	0.0205426	0.0114341	0.0140827	0.463695	0.398773
HHATL	128.044	14.4235	15.2718	0	1.85528	0.588325	3.59836	0	94.7039	1.01794	0.473396	1.13287	0	0	0	0	0.632107	15.529	3.20158	3.08939	58.9337	3.09486
HUWE1	0.0537374	0.688271	0.523329	0.368525	0.955412	1.01491	0.58588	0.513472	0.625756	0.82528	0.797384	0.485042	0.771908	0.928463	0.509787	0.505814	0.374961	0.73	0.763371	0.463339	0.496588	0.477581
LRRC16A	0.466306	0.387149	0.460453	0.384236	0.609169	0.876529	0.478038	0.259972	0.116043	0.674045	0.807152	0.338895	0.424556	0.758951	0.101216	0	1.03674	0.222566	0.394199	0.489666	0.206334	0.0944266
CBFB	0.144905	1.62296	0.286783	6.85051	1.10198	1.69144	2.11127	3.55755	1.01888	2.04696	1.41323	1.29948	1.98806	2.53994	6.66878	3.95103	0.830965	1.26555	3.20834	3.63801	0.660207	2.96797
AKAP13	0.331526	0.489811	0.755307	0.450867	0.917896	0.759441	0.730327	0.183327	0.640997	1.05053	0.976124	0.490379	0.970542	1.07824	0.503911	0.616954	0.702281	0.36235	0.673899	0.488908	0.455603	0.291277
MIR4477B	53.1536	20.8665	3.50972	115.33	5.08401	0	7.42006	86.3041	0	0.931034	0.383699	0	2.39812	1.29781	0	0	5.63135	17.1987	9.079	6.37053	2.80439	0
SFRP2	0	0.138186	13.17	0	1.72327	2.20123	0	0	4.6642	1.25831	0.133309	0	0.812861	0	30.6351	0	0.274747	79.1824	0.287753	0	1.62247	7.9823
KRT15	0	6.52852	15.2372	0.702043	0	1.44229	0	0	0	1.71929	0.257893	2.18493	2.05837	1.36349	0	29.9729	11.5455	2.8822	0	0.520562	0.315203	17.6155
VPS41	0.575214	3.15462	2.75255	5.27507	1.42219	1.90806	0.745121	1.19453	0.386175	1.09039	1.95469	1.68253	2.59	1.10843	0.624137	1.31608	2.39222	0.349217	1.50422	1.84638	3.45862	1.80217
SLC16A7	0	0.505698	0.0676645	0.30086	0.113429	0.805993	0.0898622	0	0.605707	0.275895	0.743476	0.0704913	0.390901	0.156009	0.404291	0.0745976	0.177404	0.226114	0.0155325	0.384592	0.419764	0.108013
COL26A1	14.3856	8.08742	8.88518	0.870646	0.628023	1.12325	0	0	0	0.547149	2.40126	13.9283	0.499223	0.161748	0	7.50433	4.82749	9.5791	1.6065	6.08553	3.94287	0
GPX8	0	0.208342	0.475549	0.387252	0.180681	0.282468	0.0989251	0	0.217063	0.805844	0.601317	0	0.293096	0.429357	0.323755	0	1.6384	1.03544	0.0241181	0.0974262	0.185314	0
MAP3K10	0.642886	2.43931	2.8144	1.3524	0.709199	0.975726	3.53005	9.09158	0.858881	0.922165	0.66321	3.71576	0.67405	1.69752	2.27529	4.58979	1.11058	1.44813	4.03083	3.73393	0.815762	1.39624
C1orf145	0	2.56757	5.43893	2.63845	1.4233	1.76647	3.39792	0	11.5811	0.979997	1.65958	2.66546	4.09214	0.337542	0	0	7.41355	3.88624	0.360045	16.1604	8.07626	16.6622
HES4	0	6.52844	0.144989	0.490041	0.809803	1.6168	6.55542	0	1.27287	2.69073	2.04333	7.32139	5.86869	2.41761	3.50446	1.596	0.427662	8.07387	3.41961	14.1578	4.03384	10.5488
EPB41L4A	0.627735	0.706669	0.040003	0.693528	1.16361	0.854582	0.579339	0.468488	0.251014	0.692334	0.938294	0.39905	0.845607	0.307496	0.48411	0.174653	0.982493	0.473205	0.751909	0.464323	0.478627	0.574959
NKD1	2.31039	0.764224	5.10889	3.49629	0.451304	0.400058	1.88193	1.04305	0.104854	2.62685	1.21691	1.91094	0.7062	1.54585	7.87505	1.40459	3.14665	0.82158	2.14314	1.68177	1.14877	5.87183
TUSC7	0.0869602	0	0	1.44186	0	0.0145359	0	0	0	0.00803298	0.0159385	0.11667	0	0.0598011	0	0	0.0215488	0.236654	0	0.0277967	0.0906579	0
GGCX	0.526832	2.9854	4.32749	0.967331	0.648184	1.0031	1.30539	4.23941	0.671509	0.864577	0.914026	1.94804	0.73091	0.989412	1.83004	0.255952	1.95556	0.709327	1.82954	2.45975	9.1777	4.87709
ZNF513	3.8999	2.67985	4.743	7.05346	1.77868	2.53337	6.25647	2.16308	0.573939	2.54944	1.59141	3.55296	3.28775	3.10443	0.633532	0	2.01083	1.87376	3.92599	4.96635	0.695854	6.63313
IRX3	0.208714	2.9485	1.53295	7.86857	0.582013	1.75836	0.913305	2.15035	0.947759	1.99106	3.47512	1.0115	2.15088	2.34475	0.515622	3.01701	0.436642	3.00495	7.75236	14.6294	0.235615	5.42364
FGF19	56.419	0	31.2866	5.22925	0	0	0	0	0	1.52964	3.07708	7.36364	0	4.09091	0	0	2.04545	265.375	0	66.504	2.34783	0
RELT	15.0093	1.57375	0.389928	3.01881	0.284534	1.17158	0.722532	2.24701	1.90963	1.07454	2.07713	3.61385	3.44875	6.30334	1.40924	4.02289	0.983778	0.55414	3.45442	3.85898	0.148388	4.83768
PNMA3	20.6607	8.23374	16.067	0.377353	8.94224	1.73788	0	15.6011	0.87279	1.20779	1.4016	2.06389	1.00499	8.00656	0	70.5329	4.84912	0	4.79007	7.82302	3.53223	0
TMEM101	0	0.137678	0.00904983	0.37406	1.53895	0.880428	0.94607	0	0.523985	0.412129	0.220575	0	0.665102	0.288026	0.675299	0.46673	0.397529	0.578827	0.297981	0.552161	0.201148	0.140695
DYNC1H1	0.510279	0.512126	0.619534	0.48891	0.87009	0.932211	0.500502	0.129986	0.599419	0.9185	0.779078	0.639568	0.884312	1.04547	0.523367	0.214445	0.415009	0.656694	0.564558	0.365389	0.375302	0.374636
MCCC2	0.0245525	0.151023	0.0818656	0.246101	1.09205	0.927991	0.266045	0.51355	0.877842	0.659461	0.900774	0.570575	0.662809	0.522046	0.47521	0.102242	0.19444	0.0243365	0.379448	0.189976	0.562547	0.222232
RNF225	0	0	0	2.87234	0	0	0	0	0	0.526596	0.159574	193.149	0	0	0	430.691	1.03723	7.64362	2.82447	0	175.835	0
SMIM24	0.0660473	1.54984	0.368569	1.08078	1.93244	0.189251	0.601359	0.452295	0.015783	0.194269	0.0419979	0.446485	0.0856824	0.459083	0	0.694183	0.137196	0.090284	0.363551	0.750361	0.895823	0.283262
RNA18S5	0.675638	1.91618	4.57149	3.35287	0.556109	0.623116	3.63865	1.10044	0.398433	0.778805	0.82562	2.3744	9.10676	0.998106	6.97079	0.588077	2.3971	0.80848	3.17352	4.52478	7.0478	3.3293
STX4	0.380642	4.43345	0.0390451	1.42053	0.855723	1.51718	1.96255	2.34319	1.37023	1.48737	0.978821	4.28256	2.15152	2.27125	1.78213	2.95185	1.65432	3.0384	3.36365	4.31449	0.379776	2.26327
MSH3	0.158646	0.173232	0.297635	0.0704684	0.858039	0.556142	0.332539	0	0.48751	0.491295	0.661036	0.280441	0.427807	0.487804	0	0.590494	0.557244	0.208503	0.657141	0.608093	1.38247	0.0415536
ISL2	178.65	2.45	6.76667	0	0	2.76667	0	202.583	0	1.43333	3.43333	0	0	2.7	0	0	9.36667	11.2667	0	0	0	60.5
LGMN	0.247006	0.213351	0.012433	0.346286	0.617514	0.280661	0.416811	2.62345	0.384748	0.385269	0.253253	0.86697	0.270218	0.356361	0.474321	1.47873	0.426702	1.3563	0.338232	0.138447	0.55342	0.263205
PES1	2.20572	3.81625	2.42582	1.26611	1.11052	1.15409	1.55172	2.4292	0.697132	1.21544	0.599576	2.6664	0.769779	1.5084	0.772865	0.692373	1.58395	1.09003	3.23028	3.48127	1.14766	2.12597
FAT1	0.35939	0.291017	0.2839	0.156857	1.26648	0.755726	0.594508	0.668432	0.0706716	0.815101	1.12787	0.366607	0.698711	0.4242	0.215817	0.251465	0.207941	1.13808	0.240072	0.199467	0.314229	0.141928
DAO	1.79352	0.0234749	0.20856	0.184286	0.561003	0	1.01741	0	0	0.00526988	0.00415203	0.256787	0.359789	0.209039	0	0.606356	0.121527	0.357553	0	0.365858	0.0541361	0
SMARCC2	0.32028	3.04197	1.77076	2.16607	1.07164	1.54937	1.492	0.744284	0.680426	1.62668	0.933479	1.53216	1.05593	1.96305	1.41406	0.78719	1.29377	1.22468	3.27008	2.60737	1.63323	1.81839
CEP72	2.51095	1.01175	9.45061	2.96636	1.56861	2.26962	5.1276	39.5755	0.748532	2.14896	1.59904	2.17886	3.00747	2.1292	0	2.5008	4.46556	2.315	4.72344	5.28777	8.82381	3.9386
LOC100507639	0	0.414196	0.0193851	1.38991	0.163481	0.455551	0.093824	0	0.0979595	0.0480751	0.303442	0	0	0.0737927	0.837825	0	0.128976	0.0236499	0.26997	0.0281731	0.510346	0.146164
ZNF385B	0.395718	0.253162	0.387176	0.0326159	0.783448	0.192146	0.395274	0	2.29987	0.219215	0.418127	0.262813	0.0646772	0.27901	0.319059	0	0.864433	0.0531396	0	0.335589	0.110717	0.402707
DOCK4	0.621192	0.608514	0.157283	0.903122	0.691825	0.232984	0.664799	0.44927	0.824121	0.62028	0.895531	0.289269	0.801735	0.839692	0.208753	0.222596	0.75807	0.451794	0.465909	0.278862	1.0964	0.389121
LINC01001	0.905358	2.52539	13.106	0.687095	1.51996	0.57363	4.55831	5.93013	1.41989	0.30415	0.642182	8.84477	0.393977	0.717825	1.87218	1.56172	9.03152	4.86797	4.79469	4.15803	0.267116	18.5437
DNAH5	0.177313	1.23548	0.364075	0.60072	0.398059	1.02163	0.58072	0.180565	0.0534251	0.226384	1.44884	0.0165316	0.460861	0.124412	0.0429279	0.294823	0.286241	0.241181	0.45143	0.310577	0.827501	0.133283
ABCC4	1.08827	0.230378	0.445546	0.246581	1.05758	0.466477	0.6748	0.330472	0.338838	1.02035	1.46312	0.774795	0.782665	0.609889	0.172379	0.065539	0.379015	0.655092	0.365226	0.0757567	0.130582	0.162359
FRMD4B	0	0.311726	0.280037	0.295646	0.883476	0.80748	0.595194	0	0.176538	0.585407	0.99157	0.616341	0.660082	0.621816	0	0.0997234	1.10388	0.224213	0.728462	0.567879	1.06168	0.551264
CLASRP	1.13297	4.8608	1.82769	1.45807	0.965404	1.38863	2.61707	1.75166	0.589979	1.15156	0.67199	2.73017	0.96211	3.32079	2.18407	2.24214	1.53045	0.802975	3.06438	3.26898	1.62185	3.18095
CLCN3	0.0493216	0.30514	0.415165	0.0478739	0.697492	1.04669	0.328728	1.59911	0.826187	0.674453	0.936886	0.169031	0.6611	0.420058	0.124302	0.471351	0.536448	0.439202	0.248979	0.152133	0.0562856	0.0582075
NICN1	0.424315	1.87926	5.61428	9.74991	1.9078	1.41779	1.23705	1.5788	1.57413	1.40056	1.23417	1.37005	1.12128	2.72	0.426469	1.18858	1.29574	0.271569	2.54104	3.64993	3.10554	5.44466
PRLR	2.06642	0.493805	1.02599	0.0981508	2.61361	0.11541	0.185115	1.24138	0.0220244	0.0679326	0.0852209	0.795637	0.157657	0.462192	0	1.35549	0.878824	0.112911	0.108437	0.087894	0.114742	0
AOX1	0.986998	0.312618	0.099793	0.094473	3.47152	0.125446	0.495734	0	0.089493	0.42446	0.102101	1.08176	0.0172962	0.271394	0.389965	1.53192	0.40114	0.0293209	0.229028	0	0.12717	0.239085
SLC16A9	0	0	0.0374175	0.0775019	3.03979	0.0197189	0.701396	3.46168	0.014668	0.0607731	0.0504692	0.164904	0.0132941	0.310614	0.268186	0.312594	0.00933417	0.0611368	0.0327706	0.092574	0.0718448	0.0457011
NPHS1	0.51572	0.898751	0.166344	0.0806942	0.212867	0.0250513	0.993829	1.33853	0.0124913	1.69778	0.0144871	0.974215	0.0581549	0.035822	0.14377	0.0977277	0.166378	0.863892	0.0279075	0.289983	0.114727	0.771051
LOC401357	42.0584	72.9156	9.01948	22.8409	0	0	7.07143	0	0	0.837662	0.253247	4.03247	27.1266	0	23.1429	0	9.72078	46.4026	0	22.3149	32.474	0
TCHHL1	0.0484027	1.10025	0.00631889	0.772042	0	0.00480236	0	0	0	0.00606614	0.00947834	0.13455	0	0	0	0.421849	0.695626	0.09432	0.420206	0.157509	0.594271	0
KCNK17	58.7781	17.8373	15.541	38.2509	0	1.20681	0	0	0	0.703657	0.257251	3.46154	1.89155	0.870113	0	0	22.5549	1.81211	1.97478	0	0.836066	0
CCL19	26.4466	2.86107	0.353218	0	0	1.03611	0	0	0	0	0	0	0	85.2433	11.7268	39.6122	113.023	0.748823	1.90973	12.4262	1.67425	0
CSMD1	0.938766	1.16351	0.97042	0.261274	0.0602123	0.0611596	0	0	0.0083872	0.0151339	0.133433	0.0211413	0.118923	0.0210489	0.0548981	1.49884	1.25307	0.0704248	0.496254	0.331861	0.417558	0
BMP8A	16.8675	10.2851	2.28816	5.95977	0.502708	0.430779	1.05097	0	0.862357	1.27715	0.651363	0	1.42341	0.547465	2.29855	7.81636	9.16064	19.1333	0.935086	2.41764	0.79762	7.86591
FBN2	0.982309	1.58539	0.38186	1.26396	0.0393366	0.0353689	0.0372677	0	0.0482071	0.0410937	0.135949	0.318122	0.1192	0.0132917	0.417852	0	1.03947	0.215359	0.0744221	0.259372	0.245117	0.666965
KAT6B	6.6162	3.53772	3.08856	2.28115	0.71162	1.04147	0.503094	1.19582	0.703594	0.946801	0.576145	1.95428	0.612587	1.02846	1.69787	1.10852	2.11394	1.80711	2.96132	3.36659	3.36659	2.31979
BPGM	0.628078	0.323617	1.61557	0.0391705	0.565025	0.488342	0.423139	0	0.980613	0.278245	0.488342	0.196098	0.646251	0.0713418	0.398029	1.50223	0.331598	0.982332	0.071833	0.185722	0.138447	0.0694386
B4GALNT4	15.5025	2.77203	0.493184	4.72412	0	0.534485	0.8819	0	0	0.834526	0.698475	4.95735	0.399649	2.10514	30.5774	4.24187	13.9233	3.70252	0	8.38413	0.863679	17.9891
STK10	2.821	3.26262	0.989196	1.79162	0.4517	1.18708	1.47461	0.931888	0.465177	1.66515	1.03153	3.30733	2.7804	4.17477	0.688891	1.00089	1.96566	3.16244	3.46826	2.44664	0.855257	2.27733
ACTL10	28.979	29.7711	17.2511	18.4812	0.99219	1.00841	0	0	1.61941	1.21658	1.40583	0	3.75248	0.621808	0	0	8.90808	1.82758	0	10.1084	0	6.3046
STRIP1	0.826862	0.243132	0.104891	0.285984	0.850525	0.71376	0.583222	0.405728	0.48811	0.705088	0.719572	0.558314	0.454576	0.755504	0.808365	1.06257	0.151987	0.94001	0.874603	0.356188	0.211674	0.226481
CD177	10.0575	32.0632	9.51991	47.5543	0	2.66652	10.3018	0	0	1.18162	0.405689	6.29015	0.647921	3.70241	0	6.24092	10.6365	6.80219	16.3418	0.429322	0.978775	29.1643
TBX18	6.76026	4.89513	5.43786	19.5527	0.897485	0.799529	3.20341	0	2.94131	3.30931	2.87116	8.96426	0	4.79718	66.0816	0	34.2858	6.30622	2.76526	0	1.80026	8.17135
NDNF	0.117837	0.0126482	0.0109873	0.0998656	0.222217	0.0187381	0.128612	2.31522	0.409598	1.60901	0.017929	0	0.205779	0.024317	0.343887	0	1.12935	0.0389668	0.0136277	0.0975659	0.19543	0.2091
ELL2	0.0653245	0.563189	0	0.352491	0.621691	0.474782	0.482742	0	0.284324	0.721697	0.474782	0.535161	0.0960822	0.481434	0	1.12012	0.543063	0.196371	0.311613	0.300015	0.0567396	1.33799
PLS3	0.137736	0.1879	0.0941253	0.0172069	0.398779	0.773608	0.32747	0.657124	0.535274	0.912234	0.645446	0.182641	0.52632	0.331084	0.905437	0.0534546	0.292085	1.15917	0.116753	0.164382	0.123765	0.331596
ZC3H18	0.501553	2.27299	3.33053	4.6711	0.827405	1.34114	1.74402	0.234496	0.885359	1.48384	0.805251	2.73715	1.18875	2.57955	1.10325	0.881308	2.11081	0.634972	3.17938	3.62862	3.23609	3.86828
MYBBP1A	1.88841	4.16631	2.48057	1.95229	0.92041	0.992054	2.23345	0.681053	1.78811	1.13408	0.727221	2.54282	0.709803	1.91091	1.50111	1.34721	1.6185	1.18071	2.33322	2.86062	1.0634	3.27016
CPZ	1.7136	2.32321	12.8309	0.324742	0	0.904639	0	8.81081	0.263128	1.88466	1.16994	2.31524	0.30807	0.217461	19.9934	5.93235	10.5389	11.1985	1.51426	1.66068	5.74968	6.23027
TMEM246-AS1	0	0.659793	0	0	1.76873	0	0.842586	0	0	0	0.023676	0.559867	0	0.198808	0	0	0.0226314	0.166776	0	0	0.619057	0
AGTR1	0.754171	0.0116237	0.0352812	0.607029	0.0501869	0.0155894	0	0	0.693728	0.563816	0.163278	0.125125	0	0	0	0	0.661182	0	0.0437597	0.943842	0.136476	0
SEPP1	0.203136	0.0241261	0.176706	0.0772233	0.693759	0.293405	0.447812	0.417907	0.617072	0.627695	0.422911	0.186913	0.516794	0.363519	0.620269	0.310382	1.27215	0.498506	0.219319	0.0333595	0.247218	0.0463062
ZC3H4	0.397452	2.6916	1.89408	2.54803	1.0255	1.53044	1.79676	1.79408	0.810668	1.4877	0.958905	2.37222	1.40537	1.90113	0.535131	1.22034	1.79774	0.972676	2.55752	2.32234	1.45403	2.12821
BOD1L2	9.47846	1.21265	46.0394	3.69569	3.0275	0	0	0	0	0	0.428964	0	2.71402	0	0	78.9377	1.39413	12.4812	4.30614	69.517	4.09991	289.559
ERICH3-AS1	1.71523	0.122337	0.524943	0.125714	0	0.00611147	0.100625	0	0	0	0.0528053	0	0	0.0160828	0	0.578285	0.0876514	0.00981052	0.00948886	0.0116868	0.384808	0.330931
TLE3	0.293302	2.75939	2.90071	1.44764	1.01077	1.12171	1.26913	0.801299	0.41225	1.082	1.00339	1.15136	1.1767	1.48642	0.495323	0.171341	2.47779	1.91283	2.3701	2.78443	2.3789	3.27895
OPTC	279.217	107.544	10.0531	16.2304	0	1.23764	0	0	0	0.358263	0.434258	4.49457	0	0	0	0	71.5332	5.20024	22.6791	40.5923	3.68034	0
MUC3A	0.363666	1.18929	0.356721	0.936708	0.0440404	0.040226	0.168083	0.237608	0.507597	0.0667269	0.0930778	0.15679	0.0533349	0.106886	0.214572	1.13149	0.676213	0.609853	0.175562	0.375459	0.887138	0.122877
ODF3L2	59.4388	2.30431	75.9724	8.95345	0	0	0	68.2448	27.9466	0.488793	0	93.9103	3.29741	2.32759	0	0	12.6853	58.9578	6.29224	35.0767	0	0
BBOX1	0	0.0228436	0.00837786	1.30549	2.93705	0.25195	0.292164	0	0	0.166831	0.134325	0.178393	0.234915	0.0581423	0	0.276358	0.0913187	0.0177611	0.0653473	0.0121758	1.0584	0
CD163	0.210893	0.31677	0.496761	0.411756	0.428959	0.10191	0.515781	0	0.0845424	2.32364	0.33741	0.786496	1.12875	0.463099	0.35562	1.09588	0.722874	0.13306	0.787834	0.323661	0.494381	0.370278
RAPGEF4	0	0.745585	0.0442936	0.106461	0.199891	0.143562	0.330493	0.626377	0.309058	0.428266	0.55132	0.543558	1.09481	0.66006	0	0	0.992262	0.0226453	0.0833175	0.163146	1.80429	0.0805403
NUP43	0.547824	2.67913	0.0510801	19.5536	0.720863	2.17071	1.14534	4.16679	2.2404	1.48291	1.39659	1.51122	2.20377	1.16732	0.985965	0.691363	1.89115	2.17368	2.69557	3.15548	2.02638	2.69339
OXCT1	0.771016	0.208175	0.17319	0.19299	0.303007	0.502796	0.396301	0.373474	0.810914	0.516194	0.506368	0.422056	0.648245	1.01596	0.568945	0.15726	0.295861	0.0454064	0.439028	0.302461	0.00655044	0.0561253
CCDC86	0.748566	5.48109	0.8621	0.81614	0.811104	0.99536	2.11768	10.1781	1.82724	0.723803	0.530103	6.57256	0.518771	1.44509	2.03479	4.8343	0.268199	2.01338	3.5443	4.41564	2.96048	1.54813
RHOT2	0.554995	3.67821	2.92065	3.25268	0.855001	1.4476	3.53974	2.0613	0.412972	1.3587	0.808352	2.09758	2.08557	2.81307	0.965398	0.74673	1.34487	2.95613	2.49913	2.73085	0.893052	3.45751
SNX30	0.0822715	0.639028	0.052449	0.24806	2.1597	0.792593	0.927936	0.65063	0.177067	0.468512	0.732625	0.93391	0.709145	0.880169	0.76367	0.057823	0.478845	0.470034	0.23007	0.331277	0.867876	0.341564
POLR1E	6.21354	1.60344	1.8114	0.373677	0.674619	1.26075	2.64873	0	2.78696	1.44197	1.15328	2.8057	1.83989	0.905824	2.97492	0	5.56367	1.30325	2.21132	2.47552	4.32466	10.9339
SNAI3-AS1	1.76902	7.83487	1.31629	1.11873	3.6211	1.01322	8.72911	0	3.74233	1.60215	0.168371	3.05388	1.11349	1.29683	1.778	1.48316	0.956348	13.5962	1.20404	2.79795	4.38663	2.71639
SNORD32A	0	0.33133	0.915101	0	3.68295	1.90458	41.4207	52.1563	1.70849	0.942149	1.22615	9.19835	1.76484	2.61908	8.06236	7.87077	0.146506	0.716754	0.721262	2.5447	0.297521	11.0669
ARID3A	12.2953	6.41519	1.45445	2.54182	1.21943	2.15382	2.30516	0	0.483293	1.98809	1.84442	0.149548	3.38403	2.47677	0.470054	0.46417	1.56118	2.78796	1.08786	4.61866	2.15888	4.56587
LOC100506207	0.816457	0.110979	0.719917	1.938	0.373161	0.257438	0.271258	0	0.289205	0.355627	0.344075	0	0.177813	0.418955	0	0	0.156979	0.0655971	0.167293	0	0.0699289	0
GPIHBP1	7.49588	0.650607	9.4453	8.5547	2.46921	0.594644	1.22328	3.01991	3.7203	0.906043	1.10552	1.09659	1.1807	0.23518	0.987411	0	4.78393	0.768711	12.0082	5.20451	1.3558	2.53273
KMT2B	1.17123	3.18643	2.1603	2.62633	0.859453	0.933401	2.11961	2.80186	0.282602	0.976043	0.608985	2.04991	0.864649	2.01129	0.79529	1.07514	1.93703	1.31223	3.65282	3.27365	2.10439	3.11227
GPR78	16.3125	84.622	156.096	10.7241	0	0	0	0	0	0	0.182927	10.8338	0	1.05183	0	0	19.747	17.7713	0	5.16311	0	80.1128
SERPINE1	0.374267	0.291702	0.054681	0.0803048	0.164545	0.179827	0.508374	0.752261	0.034542	2.47773	1.3921	0.0673254	0.949632	0.0196366	0.135865	0	0.0684559	0.127617	0.301792	0.788143	0.824527	0.733462
SMYD4	7.44479	2.22134	0.623621	1.70029	1.0454	1.8119	2.02663	0	3.65616	1.97617	1.74225	0.250929	0.439606	2.82878	3.49436	1.28454	1.48117	8.78637	3.73377	1.44716	1.79051	3.73076
RMST	0	0.347725	0.0393133	0	2.10692	0.0920358	0.624898	0	0.360372	0.0490654	0.170662	0.486692	0	0.977804	0	0.627032	0.194738	1.08569	0	0.0332182	0.797694	0
C9orf139	4.64907	1.20728	1.19843	13.103	0	1.29879	0	0	1.0715	1.61758	0.664152	1.22204	0.971138	3.86389	0	24.7655	5.96556	0	11.0161	11.0367	0	3.33847
SPEN	2.71229	0.490403	0.614817	0.400489	0.732097	0.604759	0.511199	0.140699	0.501041	0.810829	0.767829	0.395653	0.688108	0.69607	0.605517	0.739242	0.317543	0.762998	0.648423	0.31627	0.431514	0.252456
MYL1	0	2.17829	0	21.4494	0	6.91494	0	0	1119.26	0	0.0179283	0	0	0.290438	9.34602	0	0.414143	0.57012	0	0	10.5096	121.211
FAM118A	9.82081	5.67732	2.2823	0.19276	1.35357	1.16481	1.75495	1.13412	1.14598	3.45214	3.06559	0.873155	1.55316	6.14033	0.418398	0.323243	4.62558	0.19508	4.57556	2.62192	2.88456	1.26899
SNORD56	0	0	13.7725	0	15.7833	4.40915	130.736	218.701	0	0.381561	0.15747	57.0101	4.74226	0.981157	31.5727	28.3688	0	0	1.07201	6.83782	0	6.84993
LINC01124	0	3.44075	4.46863	18.7673	4.09705	0.550134	0	0	0	0.796247	0.931367	11.4322	20.2971	0	0	15.2928	6.16729	4.41555	2.51903	0	16.089	17.5174
GBA3	0.459788	1.2327	0.01088	0.0462762	2.84548	0.133606	0.336627	0	0	0.193736	0.316535	0.0663679	0.171033	0.547191	0.303044	0	0.118592	0.0230656	0.0232106	0.0818901	0.379712	0.263296
FOXD3-AS1	6.93559	4.15932	90.4983	2.98983	0	0	0	460.973	6.09153	3.63051	0.40678	16.3525	0	1.64746	0	0	0.661017	6.87458	0	11.4814	1.34237	0
RFX1	5.01502	3.06447	5.5764	5.22963	0.578326	0.625047	1.95914	5.87041	0.503645	0.722847	0.625289	4.38368	0.707959	1.21511	0.287589	0.9619	0.873783	4.84605	2.227	1.10775	3.28755	7.1717
CLLU1	0	2.2304	0.558504	0.108565	0	0	0	0	0.161641	0.0995175	0.0585042	1.42883	0.351628	0	0	0	0.338963	0.110374	0	0.131484	0.133293	0
STX10	1.08582	4.06969	0.560993	1.72879	1.0347	1.71465	5.31272	1.77959	1.02811	1.56869	1.01622	0.93681	2.50357	3.79627	3.72265	0.318593	0.694088	1.9863	5.70429	3.83838	2.12325	3.22161
HNF4A	0.890423	0.349267	0.791385	0.475333	3.46232	0.031668	1.10506	0.319705	0.0134247	0.165915	0.0314887	1.64548	0	0.268225	0.237543	0.429479	0.339921	0.0205069	0.0468184	0.339741	0.211456	0.449179
INTS6-AS1	0	3.60253	2.06174	16.9786	2.85581	2.82266	3.82038	0	2.60323	2.2275	1.39554	3.73987	2.03175	1.25346	6.59568	0	3.19049	0	7.79705	7.13717	1.12243	13.5687
SNORD34	0	0	0.871827	0	3.02897	2.42766	75.0374	64.6161	0	0.421897	0.370036	11.921	5.22676	1.11291	4.54836	7.62638	0.236879	1.28251	0.448528	1.00218	0	12.0472
NRK	0.433509	0.296564	0.509643	0.0234839	0.249327	0.727192	0.31415	0	0.0914578	0.0995371	0.538809	0.0860177	0.364565	0.188975	0.104789	1.27184	0.444712	0.104654	0.646264	0.185878	0.123586	0.471778
WNK1	0.0996341	0.328013	0.42404	0.432189	0.973923	0.790414	0.513425	0.238403	0.834751	1.1571	0.623739	0.404341	0.642658	0.610468	0.744394	0.365116	0.464153	0.360735	0.334479	0.247175	0.92392	0.219983
ZNF703	1.95988	0.355748	1.09871	0.0690773	1.75878	0.686167	1.57381	0	12.7306	1.90039	2.10571	1.56614	0.721474	2.01207	1.24531	0	0.926787	6.54622	3.18446	3.5122	1.27946	5.68314
ADH5	0.0634856	0.00592532	0.0709023	0.509013	0.991181	0.844379	0.342258	0	0.970906	0.736836	0.586567	0.452461	0.669884	0.173406	0.75957	0.165869	0.362573	0.51647	0.127979	0.611034	0.629858	0.0455887
EPHB6	27.0787	10.4732	1.90985	3.86966	0	2.33418	0.45	0	1.4116	4.76144	1.78734	2.61205	0.267947	5.02221	9.60057	0	0.144411	0	6.48856	2.88376	1.14091	2.11243
CERCAM	9.63508	1.62015	0.66578	2.03338	0.561831	2.45615	1.85711	2.32407	0.748101	3.51703	2.89194	0.742752	1.92316	1.30296	7.23474	0	1.67875	1.65689	3.16612	5.24182	2.01129	3.16356
LINC01507	0.743085	0.916392	0.0118326	0.0503278	1.11557	0.521185	0.757599	0	0.0903218	0.242015	0.492471	0.0326579	0.0739929	0.103259	0	0	0.0248484	0	0.164788	0.664753	0.107282	0.0892175
KRT14	24.1321	17.138	0.612801	0	0	0	2.96596	0	1.09487	0	0.396278	252.2	0	0	0	63.8579	0	2.76169	0	1.65456	4.07717	4.62052
SNORA54	10.826	26.9224	67.6125	34.9477	0	3.35559	0	0	0.524013	0.590461	1.55954	0	0	5.63882	0	0	6.57237	0	8.86513	22.1148	7.62664	43.8138
AKAP2	0	2.98762	0	1.63368	2.04784	1.60418	13.2683	0	2.01396	2.01506	1.63915	8.34106	1.62603	7.85697	7.99138	0	3.60066	0	14.3698	10.001	8.6678	9.3923
LTB4R	2.3151	0.338555	0.338189	0.163616	1.19681	1.64749	1.10295	0	0.962707	2.14345	1.38672	0	1.84324	1.91482	4.60171	0.723857	3.95528	9.16873	1.8038	4.16345	2.38449	3.59445
UNC13B	0.478829	1.27264	1.22717	0.504458	0.610976	0.631472	0.876292	1.03426	1.00632	0.590127	0.536136	0.857296	0.536136	0.452601	0.723703	0.0615932	0.379084	0.624257	0.466729	0.488689	0.527687	0.108882
PCDH17	0	0.604063	0.0404965	1.28502	0.172143	0.187313	0.340575	0	0.231911	0.235166	0.332111	0.0595729	1.69447	1.29862	0	1.09523	1.21249	0.0440123	0.104757	0.10938	1.23378	0.401905
C6	0.437375	0.102437	0.895193	0	0.549094	0.0595617	0.0802259	0	0.0571306	0.263	0.0119344	0.101111	0	0.191503	0	1.19201	0.223329	0.0747007	0.230843	0.762699	0.196476	0.257695
DDX51	0.500325	3.72952	3.34541	4.26525	0.862249	0.979813	1.82834	0.745024	0.559615	0.872921	0.60476	1.26195	1.2384	2.01951	0.845224	0.460854	2.71685	2.33273	3.05234	4.16886	0.866908	3.79322
S1PR5	8.27538	16.5053	4.57176	0	1.28471	3.52159	0	0	1.8098	2.52042	1.38273	3.20303	0	1.64177	0	0	0.402567	41.5484	0	13.0887	0.773629	0
PARD3B	0.223079	1.18816	0.740666	0.450371	0.517008	0.696616	0.439519	0.979517	0.311597	1.03951	0.485128	0.503504	0.242082	0.642583	0.851836	1.35077	0.841708	0.282884	0.782112	0.695025	0.512812	0.487668
LOC100996291	34.0796	10.6985	14.2332	5.98045	1.13233	0	1.85152	0	0	1.53018	0.132615	10.4078	0	0.413148	0	0	0.589119	5.71012	0	1.03287	13.3508	18.8135
SUGCT	0	0	0.500893	0	1.55554	0.531951	0.289655	0	1.22007	0.389657	0.652659	0.0911917	0.283487	0.150885	0	0.436575	0.0508823	0	0	0.248685	0.0290756	0
ADAMTS9-AS1	0	0.319398	0.0508096	0	2.85132	0.29531	1.32006	0	0.0667768	0.461621	0.779703	0.37158	0.147491	0.421786	0.524667	0.208341	0.00631005	0.338987	0.300743	0.289549	0.0746232	0.062058
SNORD42B	0	0	15.7126	0.390267	4.98025	2.57143	74.2397	95.0258	1.78873	0.737172	0.271019	28.2467	4.26692	1.48518	13.1043	5.43556	0	0	0	2.44784	0.479162	24.0383
LINC00535	0	1.62689	0.23484	0.292662	0.255636	0.12376	1.17699	0	0.0679666	0.101696	0.0844511	0	0.326392	1.13362	0	0.720243	0.512539	0	0	0	0.0334761	0
LCN8	313.779	51.603	5.83417	0	0	0	0	0	11.691	7.68844	0	0	0	0	53.7286	375.083	2.6005	724.5	7.23618	0	2.98492	0
TCF15	0	0	4.7042	4.82521	0	3.32773	0	0	49.3487	1.2479	0.733613	6.92017	25.1319	1.22521	0	0	0.491597	50.4605	3.9479	17.3269	3.75882	0
CLIP2	1.05183	3.27726	2.44078	3.25015	0.373923	1.30348	1.59339	0	0.248853	1.95108	1.85878	1.78528	2.25088	1.99689	1.96728	0.778589	2.94701	2.08056	2.97397	3.4258	2.41771	1.34484
CATSPERG	6.73028	14.088	16.3177	17.0167	0.515174	0.847356	0.5109	0	0.918843	1.08435	0.752558	3.30434	2.68815	0.730412	0	14.1723	8.066	5.38446	1.23354	2.36801	2.03389	14.5768
LOC100132057	0.631159	0.731068	0.297901	0	0.193659	0.049042	0	0	0.103102	0.102646	0.124088	0	0.0750456	0.865192	0	0	0.128193	1.29448	0	0.0923814	0	1.40807
CDKN2D	16.5679	6.66588	23.5151	0.901979	4.8803	1.19463	8.17861	0	6.55278	2.5377	1.58341	5.76956	5.57022	1.64279	0	7.69227	9.31527	0	11.7314	11.9138	0.479265	0
SNX29	0.512586	0.586727	0.617477	0.422619	1.62867	0.888512	0.999275	0.421055	0.169765	0.642741	0.62742	0.735129	0.325667	1.12642	0.0974558	0.422844	0.427012	0.739789	0.84527	0.794185	0.361473	0.824142
SNORD114-14	0	0.444251	0	0	4.43728	1.94948	120.726	124.223	2.70209	0.862369	0.135889	30.4599	3.04704	2.45122	36.5122	13.1028	0.883275	2.50348	0	2.11672	0	5.91115
PRSS27	23.3361	17.2593	10.1767	5.80925	0	1.33526	1.79851	27.4261	0	0.842279	0.928984	1.0256	1.60776	0.938893	0	38.7225	1.04542	8.55656	2.00908	2.79686	1.23121	69.2056
MYH2	6.67199	1.30563	0.229593	11.484	0	2.99826	0	0	560.535	0.0241381	0.0836415	0.256137	0.0467526	0.0549323	0	5.07767	2.36057	0.179553	1.05454	0.0905381	0.756623	23.111
TMBIM6	0.0228565	0.127346	0.48872	0.152826	2.24301	0.770225	0.466786	0.844797	0.308195	0.574713	0.765542	0.423191	0.896664	0.323616	0.21076	0.398036	0.191088	1.13478	0.246241	0.185785	0.708307	0.177873
FOXD2	1.59226	3.38034	32.693	0.145044	1.11845	0.434327	0	28.1104	0	1.67365	0.438356	1.29573	0.88477	0.185334	0	17.8622	0.613215	12.4488	2.55842	0.90975	0.572925	7.9307
CASQ1	26.3894	0	2.17976	10.1474	0	0.643347	1.00118	35.9848	221.521	0	0.285509	0	0	0.228407	0	0	9.64563	0.139328	0.13476	2.84671	0.2581	11.2749
QPCTL	7.1283	1.2868	6.81775	0.247428	0.948476	1.05031	1.1067	0	0.504114	2.12166	0.767533	3.43454	0.658968	2.52478	16.0172	2.10987	2.77305	1.88433	4.61277	0.601739	3.86207	4.13222
DMXL1	0.0778574	0.629964	0.13067	0.293309	2.02967	0.802393	0.503062	0.309284	0.557371	0.724265	1.06568	0.218246	0.786779	0.499763	0.32791	0	0.515504	1.1258	0.582308	0.109898	0.23817	0.22169
WDR66	0.729543	5.91141	0.568497	2.91328	0.521436	1.89312	1.23682	1.12772	0.116633	1.08474	1.07985	0.77752	0.338491	0.894662	0.480793	0.605372	0.439844	1.35977	4.70373	9.05277	1.9303	3.57549
SNORD65	0	0.430259	2.05512	5.84139	6.04893	1.39201	90.5366	72.2075	0	0.167042	0.202475	113.725	7.02587	2.89033	16.4258	23.7098	0	0	0	1.10349	0	5.72497
MUC16	3.30496	0.796856	0.672598	0.371681	0.00251117	0.00769774	0.0280608	0.166716	0	0.00915518	0.0379276	0.247813	0.0269592	0.0546984	0.0222037	0.280745	0.659556	0.286048	0.167968	0.167879	0.470062	0.153318
SGK1	1.26078	0.707172	0.753593	0.0656685	0.918018	0.546167	1.1952	1.56324	0.447156	0.475761	0.672489	0.909954	0.319423	0.279565	0.317783	0.41245	0.264846	0.636374	0.114123	0.469869	0.120962	0.433731
LINC00523	131.055	105.222	45.1131	1.27258	0	3.45012	0	0	0	0.876669	1.86646	0	7.14061	0	0	0	34.183	0	0	26.4344	1.56245	25.6638
SNORD4A	20.7845	1.1217	0	0	8.94721	4.20968	90.9501	175.249	5.96481	0.435484	2.00587	31.2625	8.56452	2.13783	31.3548	26.1554	0.857771	0	0	0	0	30.7742
CCDC154	5.89727	4.99808	2.40369	1.50072	0.358163	0.884064	3.55732	6.93367	0.204742	0.660954	0.344388	1.33866	0.752251	1.2895	0	7.78451	2.58007	3.88064	6.36753	1.64631	0.367347	6.66762
ENPP3	0.657068	0.896256	0.487597	0.161228	0.607889	0	1.11574	0	0.0507156	0.0328324	0.0174641	1.4396	0	0.182884	2.11902	0.654413	0.178553	0.0669223	0.113307	0.0304573	0	0
FMO1	0.126371	0.883552	0.0742979	0.0359454	2.32137	0.0807168	0.850254	0.603851	0.102621	0.043969	0.0709281	0	0	0.266221	0	0.254266	0.131185	0.311795	0.0650709	0	0.575929	0
TMEM200A	0.508987	0.847439	0.275248	1.46285	0.824549	0.108414	0.202877	0.569059	0.0387192	0.304629	0.19519	0.0915596	0.0732818	0.16114	0.892364	0	1.18213	0.432687	0.281227	0.60829	0.0774385	0.206692
ATG2B	0.845505	0.780922	0.256844	0.310085	0.82913	0.775985	0.478557	0.190508	0.682447	0.715863	1.24968	0.355091	1.09859	0.746648	0.0993714	0.260638	0.289117	0.217386	0.350726	0.288964	0.344493	0.16384
RBM8A	0.263405	4.88245	0.948881	3.48631	1.5395	1.78344	0.926615	2.4785	1.38828	0.926066	1.1525	1.37052	1.45989	1.07936	2.70451	0.779357	1.40231	0.491185	2.45623	2.03544	12.0413	3.65199
PDLIM7	0.665103	0.655077	0.511677	0.891605	1.10653	2.10729	3.09682	3.89368	3.1317	4.91795	2.62539	2.55712	3.65905	5.72334	9.87056	0.886239	2.90725	0.471079	1.7962	2.20938	2.31445	1.97243
PDE11A	0.541429	0.74046	0.106541	2.2593	0.095215	0.111569	0.146578	0	0.605875	0.0590551	0.10103	0.300182	0.1192	0.251302	0	0.120048	1.30176	0	0.470321	0.41805	0.480436	0.219867
NPIPB9	0	2.11342	0	6.44089	5.27636	7.01597	18.9058	0	3.85304	3.37859	0	0	0	5.44888	0	54.5895	0.934505	0	2.54473	5.82268	0	159.398
CCDC64	0.399437	0.353781	0.507095	0.6367	1.44699	0.949404	1.36967	0.40581	0.00659308	0.420438	0.800394	0.455847	0.246245	0.777863	0.0665252	0.353308	0.236559	0.0291681	0.966916	0.640531	0.830597	0.38635
ANO5	0.0887296	0.0684486	0.196614	0.605897	0.369679	0.372214	0.170136	0	4.81292	0.215712	0.271597	0.0905887	0.242809	0.277174	0	0.111658	0.471197	0.126137	0.85372	0.435029	0.100166	0.131376
RUSC1	6.58568	0.307159	5.06999	0.380099	1.18649	1.35361	5.85612	2.15254	0.940117	1.79481	0.855669	2.71921	1.62981	2.30231	6.36216	4.43379	0.391445	0.148312	1.70842	1.84782	4.84922	4.38111
JAK3	0.825426	1.43392	0.296107	3.4301	1.18911	0.853813	1.17857	1.14536	0.166544	1.47715	1.94579	2.55037	0.886367	4.44277	0.61461	1.57793	2.70337	3.88051	3.69482	1.19172	2.80442	2.77799
RSBN1L	0.218466	2.62095	1.24518	4.4428	1.06378	1.44581	1.44914	0.812872	1.65726	1.70309	1.16996	0.869892	1.98939	1.22698	2.719	1.48528	4.58474	0.400706	2.35101	3.94441	2.76475	5.65637
PLEKHA7	0.244284	0.391706	0.156665	0.785155	1.23175	0.944831	0.942472	0.395632	0.0742041	0.634423	0.705599	0.729102	0.72301	0.93763	0.0506313	1.18042	0.429609	0.441968	0.624741	0.331392	0.824748	0.617945
SNORD48	5.87584	4.77566	105.515	4.12589	0	5.48943	0	64.5506	0.297812	0.845032	0.579216	0	0	3.66727	0	0	5.92261	0	7.73491	31.5279	0.278122	71.3814
DGKQ	21.6421	2.67398	2.06692	1.42559	0.818041	0.959915	2.83709	3.75415	0.289538	0.938393	0.395992	0.908474	1.61388	1.74929	4.08586	0.809741	1.10623	2.65806	2.36919	1.65905	0.692768	0.949878
LINC00896	22.9143	0	68.743	56.1713	2.3576	0	0	0	2.90364	2.29336	1.11135	0	0	0	59.409	0	10.5032	2.04283	0	0	3.19272	0
UGT2B7	0.175017	0.182935	0	0.0109477	2.27916	0.166684	0.358636	3.25485	0.0328921	0.170032	0.259056	1.03727	0.157594	0.109233	0	0.100558	0.131984	0.163043	0.0775873	0.110479	0.127927	0
DNAH9	2.42704	0.822428	0.367686	0.80669	0.0280043	0.0305634	0.0401688	0	0.00302139	0.0605519	0.100281	0.065704	0.0420402	0.0449601	0.0365837	0.809316	0.541111	0.150495	0.153494	0.290674	0.644673	0.0127507
OTOGL	0.227675	0.16899	0.469216	0.265163	0.393395	0.00601086	0.244705	0	0.0538868	0.0220398	0.0790903	0.0482451	0.0224089	0	0	0.325747	1.09466	0.139726	0.52595	0.238378	0.91228	0.388966
ALPK1	2.70649	0.627644	0.235763	0.458211	0.454602	0.614817	0.516834	0.592821	0.184601	0.495619	0.892084	0.11554	0.359009	0.629595	0	0.154558	0.528198	0.0737917	0.182016	0.220497	0.460162	0.113736
ERBB4	0	0.417867	0.320604	0.331943	0.311005	1.48238	0.275125	0.419117	0.264547	0.452896	1.12118	0.073916	0.673485	0.582163	0.0756729	0.14823	0.337304	0.0405533	0.389014	0.368312	0.44087	0.405841
ACTB	0.169101	0.182036	0.249214	0.445127	0.289348	0.690656	0.22318	0.318435	0.130835	0.941058	0.760042	0.379066	1.13723	0.543694	1.51888	0.390325	1.08987	0.65316	0.188241	0.316958	0.675234	0.157971
GPS1	0.897943	0.046812	0.215027	0.414373	0.747027	0.591257	1.29348	0.426548	1.2793	0.513314	0.451668	0.754617	0.306686	1.01746	0.517089	0.458719	0.166366	0.637375	0.689119	0.993377	0.10603	0.284224
CLIC5	0.13438	0.329724	0.100097	0.625994	0.307307	0.0491224	0.140959	0.243517	4.71599	2.33132	0.0328457	0.639566	0.072709	0.0318955	0.532501	0.284647	0.470025	0.162572	0.0773629	0.0911055	0.321854	0.331479
DEF6	0	4.09584	1.35619	2.9047	0.378556	1.21217	1.37935	2.02384	0.40172	1.63812	0.581397	1.84462	1.2329	8.42958	0	1.88196	4.04144	0.864857	7.03727	4.30661	3.1432	7.10951
RPL3L	19.2788	3.25291	10.9535	1.98093	0	0.547587	1.24623	0	261.817	0	0.214572	0	1.2222	1.78695	0	0	11.3105	10.605	0	0.695213	8.98627	16.8945
EPS8	0.105006	0.0245934	0.0603295	0.103176	0.936805	0.397421	0.77988	0.405778	0.432919	1.15945	0.746505	0.179662	0.510705	0.330114	0.482477	0.0525827	0.703552	0.849999	0.0842331	0.223569	0.210437	0.531717
MAOA	0.200347	0.396219	0.465286	0.39359	1.71423	1.22695	0.237525	0	0.848749	0.742421	0.750002	0.59984	0.384722	0.196291	0	0.152205	0.151086	0.0966211	0.0734589	0.383575	0.602469	0.137351
NTRK2	0.0458838	0.433102	0.120174	0.0921325	0.185542	1.25901	0.175725	0	0.122512	0.209305	0.669221	0.096643	0.46388	0.29633	0	0.356574	0.36911	0.22136	0.759712	0.164233	0.0654844	0
THSD7A	0.456404	0.305254	0.946713	0.430374	0.673292	0.769948	0.27957	0.209945	0.0524042	0.960842	1.03617	0.0277739	0.491985	0.414225	0.0560487	0	0.711205	1.25701	0.543301	0.0780881	0.112771	0.234973
DBI	0.218769	0.176746	0.561486	0.432865	0.771398	0.973758	0.44056	0.647451	0.944919	0.416027	0.387679	0.697454	0.677045	0.376433	0	0.349105	1.20118	0.337634	0.322082	0.538668	1.11913	0.57016
RRP15	0.0880894	0.615899	0.405323	0.281271	0.542911	0.395088	0.10498	0	1.36564	0.355937	0.433009	0.378757	0.657231	0.0262311	0.487205	0.195307	0.467797	0.450347	0.527306	1.09544	0.153919	0.130428
FGD5	0.0752848	0.500738	0.886448	0.652426	1.04856	0.263423	1.18974	0.280286	0.342739	0.495567	0.356458	0.553988	0.499556	1.08016	0.201815	0.52292	0.499556	0.0472561	0.277543	0.531721	0.651518	0.570471
ATP2A1-AS1	0	2.42559	144.564	2.40109	0	2.60526	0	0	122.398	0.849365	0.212341	3.38113	0	0	0	106.367	30.8548	15.1579	4.26316	5.83938	0	0
UNKL	0.7395	1.62931	2.20602	3.88623	0.994028	1.30789	2.36311	2.05494	1.23881	1.7609	1.19426	1.52717	0.552517	2.10049	1.42787	0.541679	2.1873	1.75159	2.62706	2.82258	3.91929	3.58857
GAS2L2	19.0228	0	31.3716	7.82927	0	0.685003	0	13.6938	4.54593	0	0.655423	3.68812	3.84847	0	0	55.205	13.0213	5.37727	9.47327	3.56668	1.1069	0
CTD-3080P12.3	0.467815	0.0348021	0.09612	0.151046	1.68683	0.142996	0.843535	0	0	0.0591872	0.00615546	0.380692	0	0	0	0.898935	0.180166	0.043325	0	2.34476	0.0312508	0
PRKAR1A	0.0387251	0.349277	0.538444	0.138589	0.905051	0.698625	0.206412	1.08748	0.800961	0.893501	0.739717	0.597764	0.837825	0.331877	0.550114	0.527146	0.584205	1.06291	0.313333	0.390931	0.432233	0.140731
CCDC61	0.213247	3.85534	0.531355	6.74615	1.05696	1.57161	2.61761	4.52199	0.505001	1.47139	0.655332	3.2735	0.877487	1.278	2.63153	0.648094	2.12728	0.884169	3.31953	7.58633	3.35405	4.80521
SNORD30	8.81586	0	4.77238	0	0	0.87468	73.688	212.417	0	0	0.130435	58.5652	3.83632	6.09207	27.445	47.4015	0.882353	0	0	5.48593	0	0
COL1A1	0.306898	0.995526	0.907244	0.972731	0.287268	2.20972	1.2998	0.944656	0.215499	8.58713	3.58959	1.4278	4.41344	2.00253	6.4765	0.687516	3.02382	0.772286	2.20972	3.81778	3.29454	1.71526
RSPO4	5.06431	0.273312	4.19936	21.9807	2.7299	1.19936	0	0	0	1.03537	0.167203	10.2701	0	6.04502	79.373	6.37299	1.01286	1.54019	0	1.30225	10.7203	11.672
TGFB1	0.309653	1.99052	1.00851	2.94701	0.580197	0.94157	1.62715	1.40305	0.278972	1.87374	1.68742	2.13131	2.07201	1.11832	1.56421	5.7069	1.43512	1.66989	3.41788	2.23869	3.32475	2.82859
ZAP70	4.37802	0.368539	16.8577	4.51964	0.685389	1.09683	1.25086	5.72243	0.902481	1.8153	0.809442	6.25637	0.828567	7.25138	3.51533	5.92609	9.62595	2.46244	2.23759	0.369573	2.04118	8.37509
HES2	0	0.155141	0.273778	0.328534	5.77489	0.803083	0	13.7364	0	0.456297	0.0949098	1.67005	0	1.04218	0	0	39.2269	1.23383	0	4.1815	0.618739	15.6875
ENAM	0.893644	0.145051	1.09742	1.6097	0.510383	0.598324	0	0	1.01517	0.218763	0.799726	0.0392748	0.112891	0.329472	0.307842	0	0.029883	0.289154	0.0495204	0.107104	0.0125224	0
PDLIM3	0	0.0614691	0.735539	0.802026	1.32305	1.13362	1.26284	0	94.6227	2.1648	1.40961	3.19179	0.327417	2.34294	25.3546	7.25461	8.35478	1.9921	0.0740138	0.298982	10.1784	4.63611
FER1L4	4.42052	4.11911	2.28489	2.74099	1.20646	1.95831	5.1745	1.83007	0.136457	0.899723	0.730191	1.38997	0.526732	5.66208	1.35945	0	3.66194	4.58557	3.73161	4.48517	2.02179	2.39062
ATXN1	0.138432	1.04652	0.339318	0.361274	0.456309	0.487969	0.652126	0.300095	1.365	0.777167	0.735857	0.304269	0.933463	1.0111	1.07845	0.89237	0.797904	0.746537	0.596205	0.389329	0.358048	1.05059
SRRM2	0.052939	0.369624	0.233879	0.595388	0.988957	0.793887	0.66422	0.359135	0.314531	0.988957	1.4243	0.408061	0.760076	1.5605	0.506787	0.390253	0.326044	0.457999	0.457999	0.423405	0.281979	0.366516
SORD	0.385479	0.0224177	0.0306451	0.0221913	3.18717	0.186663	0.480887	0	0.261087	0.130128	0.0845382	0.913617	0.396122	0.21361	0.409859	1.10005	0.0318528	0.114202	0	0.0852176	0.170209	0
PLCXD3	1.09029	2.94846	10.5595	2.83155	0.66608	0.194866	1.1757	4.20753	0.046058	0.475616	0.0617719	3.29206	0.225075	1.03827	2.54125	0.538269	5.78651	0.97311	2.55242	3.99634	7.86013	6.65795
TNNI3	3.54996	31.9249	32.6506	7.61382	0	0	2.96394	0	16.7288	0.279489	0.117205	5.33959	0	0.676183	37.0977	0	16.2712	0	0	3.78663	10.3434	0
SLC1A7	76.254	3.82081	45.5786	0	0	0.445807	1.83773	0	3.49938	0.259938	0.497516	8.14472	5.21134	0.655435	0	11.1061	9.20823	6.65776	4.43711	11.7769	19.7148	1.58059
SLC13A2	0.0701061	0.157173	1.00657	0.571128	2.95988	0	0.135175	0	0	0.0241568	0.0111018	0.419506	0	0.0936461	0	0.325757	0.92464	0.0694893	0.38363	0.310955	0.342718	0.116261
HSD11B1	0.587332	1.23262	0	0.246163	0	0.0525257	0	0	0.0744251	0.411643	0.349238	0.0681681	0.154448	0.0940193	0	0.814724	0.542546	0.0301323	0.0291443	0.0666862	0	0.808467
STAC3	0	7.2335	0.0522325	3.27149	2.285	1.08435	5.63623	0	102.828	0.777567	0.635147	1.42107	2.10079	2.11611	1.12996	4.21969	1.14737	0	1.29954	0.797764	0.0459646	8.59572
MRO	1.88452	0.855038	0.0799279	0	0.07777	0.107721	0.113504	0	0.187218	0.0638733	0.0609385	0.427778	0.036684	0	0	0.245135	0.568731	2.00855	0.0152778	0.666526	0.0613701	0.313324
ARX	39.7479	13.0877	28.6705	35.7841	0	0	0	0	37.8722	0.583956	0.382226	36.4672	1.16437	1.06174	0	0	0.598112	20.0845	5.69446	3.99567	3.53205	4.00275
KRT18	0.0131711	0.357357	0.413594	0.552334	0.516626	1.22618	0.31259	0.193008	0.00517572	0.578812	0.91392	0.287735	0.974619	0.513323	0.0859595	0.19689	0.256102	0.350887	0.203553	0.101911	0.762183	0.142468
CEBPZOS	0.16401	9.83461	7.36746	8.34453	1.85293	1.2203	1.73317	2.44845	2.63572	0.835467	0.957796	1.08955	1.16848	2.36009	3.24723	0.54199	0.288481	0.618928	0.868583	2.27502	2.01366	2.6794
COX6B2	68.4646	0.403907	0.712777	4.14361	2.10982	0	6.24868	0	0	0.784055	0.917107	1.96727	7.07075	1.42555	0	168.501	15.6573	0.869588	0	0	0	0
LGALS8-AS1	148.708	1.41405	29.2625	0	10.464	3.57671	0	0	7.51941	2.39556	5.15712	0	21.4104	13.2089	0	0	0	5.2902	2.94455	18.7819	2.19593	0
LINC01206	1.33945	0.533754	0.838133	0.334068	0	0.0148175	0.0391183	0	0	0.0134705	0.058839	0.50719	0.0421895	0.0369091	0	0	1.50568	0.0171344	0.0436982	0.162993	0.351795	1.01142
TNNI2	1.99232	0.453413	7.49986	1.97631	0	1.50688	0	0	306.694	0.156756	0.0817492	9.46016	0.659893	0.319412	0	0	0.355651	5.20667	0.439929	0.602585	0.599213	34.4931
MYH9	0.0571585	0.430377	0.246509	0.414415	0.517817	0.973697	0.309884	0.23416	0.125713	1.95766	0.932191	0.374519	0.848353	0.848353	0.75285	0.446848	0.649185	0.438589	0.75285	0.496106	0.598607	0.333684
RGS11	52.5115	1.97946	0.156685	3.52855	1.05292	0.563022	4.84784	25.4509	1.00801	3.36142	2.80884	4.26288	1.67444	4.16574	4.36421	0	0.440808	8.41086	5.15912	1.75487	0.51915	1.18141
RAPGEF2	0.0147921	1.09221	0.1384	0.0250295	1.18882	0.956804	0.534838	0.351953	0.758607	0.79665	0.864082	0.165555	0.766242	0.465085	0.601685	1.04734	0.0819424	0.197286	0.64862	0.198501	1.0939	0.266671
CBX4	0.0735433	3.12721	4.68154	4.80932	0.898911	1.52123	2.37636	2.42337	0.842837	1.73819	1.2951	2.42272	1.67953	1.1768	1.01311	0.92835	0.778459	1.13356	4.16523	3.59812	3.74963	3.14069
EMP3	1.46026	1.47545	1.31801	3.43289	0	1.11176	2.93294	0	1.39673	2.20972	0.906445	1.87872	6.01366	2.87171	1.49386	13.0212	6.10481	1.40317	5.5823	16.0343	7.96512	9.82128
WDR73	0.451425	0.558739	2.64069	1.75915	1.093	1.31367	3.77612	4.99217	0.402088	1.10749	1.45247	0.732666	1.33796	1.8417	1.77873	0.657797	2.74426	0.145228	1.26222	2.01966	7.59543	3.51436
LOC100996455	31.6423	9.45923	72.3095	0.898502	0	0	0	37.5674	1.81198	1.5025	1.21797	11.8253	0	0	0	105.809	26.9601	2.39101	0	0	0	0
SNORD90	0	0.737534	12.1415	0.626208	2.76575	0.396598	62.2242	82.6873	1.57248	0.299188	0.0347893	11.1117	2.477	0.563587	14.535	16.2953	0	1.1063	0	7.97024	0.768844	0
SLC4A4	0.196615	0.396526	0.532247	0.146491	4.73924	0.299205	1.07061	0.765991	0.0911708	0.0893607	0.0628128	1.76732	0.0472604	0.211375	0.0292226	0.461464	0.233249	0.305067	0.136468	0.389322	0.331471	0.316099
THBS1	0.0103525	0.0823124	0.137395	0.135004	0.423601	0.431672	0.315324	0.587999	0.0286052	1.30009	3.21807	0.204923	1.48853	0.240015	0.193033	0.219725	0.125438	0.631006	0.15561	0.187524	0.271563	0.0470261
SH3GL1	0.616834	0.53279	1.27198	1.12959	0.787141	1.18335	1.68524	1.71859	0.52499	1.687	0.946588	2.00727	1.1585	2.18989	0.89948	0.396438	1.15987	1.30448	1.91076	3.51678	2.14768	3.1299
FFAR2	140.656	44.884	0	25.0544	0	0	0	0	0	0	2.87974	108.077	0	9.2126	0	167.412	1.48819	19.6364	10.3658	1.40444	0.850394	55.3722
RPS6KA5	0.114138	0.702066	0.687506	2.35472	0.94122	0.854194	2.2041	3.14147	1.97951	1.11209	1.06724	3.92136	2.55154	3.42632	6.10906	0.688677	0.809175	0.510107	4.01608	4.5282	0.227607	2.7117
PABPN1L	95.4138	2.93103	31.931	0	0	0	0	0	0	2.96552	6.65517	14.2759	0	13.069	0	0	26.2414	23.3103	6.10345	0	0	39
LOC100507205	0.307793	0.0663424	2.18163	0	0	0.12411	0	0	0	0.0148932	0.0564136	0.186842	0	0.309147	0	1.13143	0.0762712	0.216177	0.942784	0	0.0595728	0
MAP3K13	0.771085	0.831082	1.16586	0.31232	1.47965	0.328415	0.546996	0.291881	0.25081	0.460627	0.467026	0.399621	0.308713	0.404934	0.341834	0.78462	1.00452	0.517715	0.365647	0.557041	0.577829	0.574339
ITPRIP	0.127578	0.226392	0.528447	0.334597	0.329524	0.192771	0.601572	0	0.296981	0.645448	0.531847	1.15722	0.606213	0.346307	0.695205	0	0.784629	0.120833	0.171346	0.32893	0.179927	0.0610369
MSRA	0.0740988	0.558481	0.00967347	0.0411445	2.26475	0.238354	1.04383	0.644511	0.387003	0.183989	0.288076	0.960833	0.311615	0.495733	0	0.183151	0.0108988	0.196565	0.240676	0.195082	0.462908	0.398095
SIGLEC9	58.4896	0.144923	18.6566	0.289846	0.724614	0.271114	0	9.85278	0	0.970095	1.25698	1.58528	7.03911	2.0023	0	52.9993	0.983897	0.180414	0.315478	6.00887	0	6.08577
FBP2	4.48029	24.2934	53.2182	1.93139	0	1.09051	0	0	439.463	0.216788	0.262774	0	0	3.08102	0	0	6.5562	1.20219	13.7234	24.5628	52.108	7.42993
LOC100129940	0.347638	0.584838	0.849333	0.0727423	0.11403	0.144413	0	0.899193	0.0561641	0.0968216	0.248925	0.257246	0.135588	0.198623	0	1.68013	0.491168	0.0953718	0.16553	0.576896	0	0
PHB	0.356634	0.444247	0.0147537	0.717228	0.794413	0.842526	0.268547	0.273489	0.856916	0.419282	0.524121	0.609627	0.554028	0.557045	0.205317	0	0.347113	0.581428	0.668606	0.439269	0.782639	0.357651
HEXDC	0.236961	0.411334	1.21881	0.427583	1.616	1.56981	2.99428	3.77151	1.12523	1.07016	0.785807	1.27959	0.592778	2.3651	0.585406	5.33501	2.18741	0.181595	2.69097	2.58626	0.690421	6.00843
KLF7	0.728238	0.232311	0.129675	0.417193	0.244972	0.509554	0.37835	1.23667	0.241056	0.720968	0.9029	0.473152	0.83208	0.406517	0.0870494	0.110388	0.634938	0.281992	0.100114	0.427548	0.0894369	0.165595
41334a	0.985299	0.0432775	0.0432308	0.348134	1.22209	0.534597	1.27634	1.36439	0.512561	0.463961	0.364568	0.439451	0.323018	0.558733	1.80328	0.132587	0.307611	0.354764	0.492066	0.141224	0.184361	0.229226
ANTXR2	1.651	0.802566	0.330746	1.39849	0.265554	0.110149	0.274224	0	0.255071	0.607979	0.475071	0.400666	0.588621	0.620423	1.40442	1.39403	0.387923	0.309109	0.206378	0.283249	0.367967	0.254193
FLJ12825	0	1.08639	0.651349	0.630446	0.158451	0.0696141	0.135496	0	0.0843581	0.192232	0.243743	0.761649	0	0.35087	0	0.369906	0.031541	0.0893972	1.02294	0	0.0927566	0
ENO2	6.00947	2.44828	1.05488	1.02102	0.45671	2.4782	1.74856	0	0.849342	2.3443	2.24758	7.70574	3.39525	1.93958	0.869291	2.13726	0.301652	1.044	3.49711	6.35979	2.61422	8.80323
ANXA2R	0	9.84092	0	34.7278	3.16962	0.71586	10.436	0	4.40728	3.10494	2.14758	0	0	25.426	0	8.5472	1.81984	1.37135	1.37997	0	2.14327	42.4427
RNA5S9	0.688729	0.125015	4.76203	0.67821	0.514085	0.61523	11.7979	10.5501	0.0917046	0.0656767	0.0602823	9.01362	0.853123	2.90744	3.91296	1.72297	1.05083	0.524065	5.35609	4.41693	7.71168	6.56848
RNU6-34P	12.8679	1.60377	24.6415	0	0	2.15094	35.4151	142	0	0.622642	0.490566	30.3396	6.20755	3.0566	0	0	2.16981	3.45283	6.03774	0	0	0
GDF15	0.0442248	0	0.469937	0.0290509	0.125087	0.990842	1.36092	0.717907	0	0.17865	0.417023	0.104272	0.365276	0.549113	0	0.184162	0	0.400617	0.242004	0.242458	0.966136	0.638211
HCG9	107.589	79.5723	0	185.791	0	3.14086	0	0	4.14594	1.41624	0.77665	0	5.71066	11.8896	0	0	11.3985	10.4505	0	0	8.12056	0
KLHL29	1.89422	2.74634	1.48026	2.46748	0.97199	0.438887	1.192	1.35703	0.35346	1.34885	0.524417	3.70086	0.44931	0.734715	0.890139	0.323826	1.7578	0.397093	1.18229	1.69127	9.34886	2.048
HAP1	20.6251	6.4972	6.30266	0.272737	0.735639	1.82002	4.1192	5.87103	0.18735	0.435691	0.605838	1.82283	1.44438	0.447263	1.69835	0	0.312146	1.63079	2.25446	8.25498	7.25161	2.68827
ADRBK1	0.0853237	1.68865	1.86488	2.47951	0.800445	1.34819	2.23467	2.68577	0.931931	1.8119	1.22928	2.83443	2.14129	2.23467	2.12455	0.0977198	1.99078	2.83751	3.11424	2.59089	2.47405	1.43854
PIP4K2A	2.22481	2.1794	0.336138	1.73263	1.15882	1.05257	1.56818	3.51408	0.296502	1.672	0.782491	0.654544	2.70211	1.87289	1.49642	2.51499	5.44774	3.70732	2.04534	2.00591	0.818232	4.31959
PHOSPHO1	0	7.91048	1.07699	8.00649	0	1.14796	3.03061	0	6.88358	2.86781	0.805659	1.7282	2.97217	3.31447	0	55.3233	0.705473	1.32746	3.38544	9.56354	36.1044	0
OTUD6B	0.602141	8.82824	0.907136	2.01193	2.19969	2.03028	1.38746	1.01876	1.52773	1.99144	2.17706	1.79796	2.47115	2.39266	1.14098	0.60581	0.130275	1.11916	5.48909	6.7998	0.0134557	5.82905
MYOCD	1.30012	0.197166	1.87707	0.285859	0.0683285	0.0820862	0.0303589	0.67856	0.140337	0.247304	0.0823371	0.979807	0.0392241	0.494733	0.627543	0.206909	0.778752	0.336708	0.417122	0.573391	0.30016	1.66999
TENM2	2.20115	0.579157	0.251168	2.16357	0.0199818	0.0198018	0.0844726	0	0.0306028	0.22448	0.106885	0.143743	0.022502	0.0211069	0	0.525737	0.296532	0.0680911	0.520697	0.136137	0.529563	0.666465
RN7SL2	2.67972	2.67972	2.67972	2.67972	0.681382	1.09779	1.09779	2.67972	0.0207827	0.681382	0.382753	2.67972	0.681382	2.67972	2.67972	0.382753	2.67972	2.67972	2.67972	2.67972	0.382753	2.67972
FOXH1	8.58051	12.4322	26.3354	1.60169	0	2.6586	0	0	1.9776	0.468523	0.588378	41.5841	0	0	0	25.5182	29.4243	4.98487	0	0	1.204	0
ANHX	291.327	80.3512	88.0813	20.6365	0	0	0	0	0	0.455521	0.717791	5.71472	0	0	0	0	82.2975	2.52607	0	5.59049	13.7761	0
COMP	2.43878	4.54645	2.30419	4.66865	2.02014	0.900454	0	7.08184	1.48713	5.74458	1.45782	0	0.973531	1.30093	6.69664	0	6.26189	18.0372	2.03913	1.54369	13.1695	0.962796
MCM9	0.142434	0.133078	0.0469983	0.454437	0.67597	0.806349	0.528137	0	0.213724	0.499492	0.642358	0.43558	0.188857	0.51673	0.327333	2.22155	0.15539	1.21908	0.436372	0.219338	0.708682	0.265472
SUCLG1	0.0206165	0.0280228	0.0188028	0.0859124	1.90812	0.539265	0.489295	0.302114	1.03935	0.335034	0.322307	0.679167	0.329593	0.144316	0.134552	3.52866	0.0386334	0.0204352	0.201208	0	0.333099	0.0704953
SLC22A2	0.0260921	0.141479	0.0098706	0.622345	3.56283	0.415637	0.32485	0.545752	0	0.0943063	0.50057	1.58446	0.0272398	0.567636	0	0.753762	0.0120513	0.217115	0.188957	0.0273546	0.0862721	0
QKI	0.0953168	1.78993	0.412291	2.57993	0.883482	1.01554	1.70506	1.62296	2.93507	1.40924	1.33751	1.47132	2.07633	1.30708	0.778159	2.11567	1.53126	1.66596	2.95392	2.01277	4.6348	2.53213
ALAD	0.0261957	0.446211	0.311161	0.511931	1.40881	0.62912	0.783836	0.383871	0.68639	0.668145	0.395625	0.122682	0.418786	0.691268	1.32062	0.305246	0.558445	0.532326	0.994477	0.20269	0.332209	0.425853
TPM3	2.06776	1.09878	1.65046	1.57401	0.937334	1.48791	4.39249	3.53412	13.3645	1.36945	1.03343	0.973795	2.23287	1.12384	0.547471	1.83691	1.62359	1.33274	1.42948	0.931418	1.64664	1.58913
FUT6	0.305135	0.314711	0.28824	0.0521281	3.27878	0.0535736	1.04342	0.500095	0.0204176	0.0693837	0.00564646	2.31473	0.0148615	0.599744	0	0.0895302	0.0738557	0.0683447	0.00799538	0.44738	0.124312	0.0510891
SUPT5H	0.499534	5.44551	1.84168	2.29785	0.958372	1.29405	1.7263	1.32865	0.520043	1.2572	0.622255	1.77652	0.852316	1.87752	1.02998	3.08837	1.44703	0.89525	4.04465	2.85631	0.880433	2.59236
GLIPR2	0.681857	5.95572	6.15907	1.87962	0.256879	0.445615	0.649183	6.06384	0.574807	0.843938	1.14058	1.06535	1.16638	1.30632	2.40606	2.55933	2.18788	1.32803	3.14617	5.67347	0.382201	7.87038
SLC35B3	0	2.51549	0.083541	3.03937	1.33666	1.60312	1.97618	9.12675	1.00764	1.47925	1.94325	1.75004	1.36073	1.01237	1.39941	1.77144	0.677999	2.06486	2.38071	1.73399	1.77967	6.74501
MIR6513	0	0	3.10345	0	23.3172	4.44828	50.069	710.131	7.51034	16.4069	3.9931	0	8.7931	14.1724	0	0	0	3.78621	0	0	0	0
SNORD17	0.00675057	0.583673	0.155429	0.2678	0.74728	0.231531	1.18079	0.646781	0.012564	0.0945005	0.211878	0.522307	0.930898	0.689059	0.384105	0.625226	0.31265	0.0828907	0.138129	0.769962	0.309846	0.477035
ZNF264	1.57777	1.64833	2.05226	0.903877	1.74905	1.08015	1.83914	5.51352	0.75573	1.49356	1.61747	2.16292	2.52408	1.07196	2.88744	1.42207	0.522786	0.252007	1.47856	2.27166	7.47482	4.62342
ERCC2	1.61947	2.92929	10.5194	0.534757	1.5992	1.76938	2.23274	1.58211	1.0616	0.693696	0.693696	1.77698	0.425526	1.52179	1.79535	2.47448	1.04308	2.11322	1.91962	2.27375	1.13632	4.98964
BARX1	78.6747	45.7361	0	65.0576	0	0	0	0	0	2.07435	2.09108	68.2695	0	0	0	0	80.8829	134.699	19.5725	50.6041	98.0632	0
ZNF835	4.50044	11.3405	2.00392	0.394791	1.751	1.82679	5.09791	0	3.93117	1.24342	1.15089	0	1.98541	1.26016	0	84.435	0.371879	0	5.86547	3.29492	3.47998	0.996671
OR2C3	0	0	0	0	0	0	0	0	0.38138	0	0.108245	0.51318	0	0.128996	0	0	0.064498	0.51318	0	0.227145	1.86988	0
PRR23B	15.1556	0	20.5778	86.4222	0	6.11111	0	0	0	1.4	0.577778	70.9778	12.9556	0	0	0	2.55556	4.06667	0	9	22.1778	0
TMTC1	0.248622	0.0845894	0.0921114	0.315765	0.910003	0.125182	0.427196	1.34916	0.63776	1.15002	0.370399	0.540607	0.478372	0.609308	1.26678	0.186625	0.699915	0.277443	0.537255	0.281956	0.716859	0.563067
ALMS1	0.590383	0.532661	0.280153	0.372356	0.61413	0.847354	0.472485	0.15596	0.324722	0.765592	1.18606	0.12101	0.506402	1.07445	1.27959	0.163007	0.920073	0.883479	0.636913	0.423219	0.129407	0.304064
MDFIC	0.942989	1.43005	0.778393	2.17558	0.642624	1.71408	0.710076	5.79591	1.98946	2.15781	1.59224	1.07857	1.24518	1.72926	0.521747	2.42944	1.45734	4.67997	3.1031	1.88194	0.563257	2.0499
RNF186	0.906251	0	0	0.041214	1.79808	0	1.45875	0	0.234004	0.00755591	0.0396113	1.94736	0	0.0370926	0	0.869387	0.0386954	0	0	0.0499148	0	0
TBC1D29	0	1.47683	0	0	7.71429	3.73552	0	0	10.4073	0	0.903475	0	17.5483	0	0	244.911	2.93629	0	0	3.78764	0	40.5174
C17orf96	13.549	34.1148	61.296	21.7361	0	3.56474	0	0	0	2.93798	2.66376	0	0	7.73667	0	0	2.7519	0	10.2291	1.98313	8.7062	0
PITX3	0	5.8549	44.7062	4.87545	3.99395	0	0	0	40.0919	1.1318	0.28295	0	0	1.763	67.8646	91.3059	3.42805	9.95768	40.6143	57.4281	94.1245	0
TET2	0.0727344	0.62221	0.311646	0.262419	0.382571	0.590041	0.292515	0.171219	0.601996	0.688897	0.867663	0.394278	0.769905	0.733855	0.33005	3.34404	0.420895	0.132323	0.608414	0.24649	0.304563	0.363966
TNNT3	0.907875	1.05159	1.34787	6.7062	0	1.55622	0	0	237.228	0.170616	0.0318265	1.91221	0.107948	0.298906	8.87138	0	0.419322	0.396026	1.62052	1.2268	0.0433102	27.063
KIAA1109	0.822453	0.412946	0.351516	0.174968	1.33656	0.905861	0.544273	0.0827813	0.839125	0.903886	1.164	0.361289	0.826083	0.76987	0.397228	0.677601	0.319057	0.790335	0.337874	0.138491	0.496449	0.249352
SEC31A	0.274415	0.195904	0.35006	0.236603	1.09744	0.87769	0.43581	0.547506	0.825758	1.03141	1.25419	0.387338	1.21735	0.587276	0.422045	0.201619	0.748176	1.03195	0.345294	0.659875	0.217915	0.219259
ZSWIM4	6.64534	1.17809	0.223352	4.02593	0.54562	1.30786	3.60615	1.26901	0.145389	0.960962	1.57909	1.65426	3.06218	2.11861	1.34583	3.69554	2.91895	5.37316	3.42203	3.97336	3.44882	5.19691
GPR153	3.16949	3.4029	6.95551	13.9491	1.95254	0.641285	1.18669	10.0869	0.423987	1.27628	1.32462	3.69879	1.98319	1.17883	3.05671	0.778816	1.89989	5.86273	1.46647	1.18866	2.30344	3.37736
SRSF9	0.0746492	1.80003	0.578157	1.05685	1.27014	1.40956	2.14728	1.05425	0.549831	1.32913	0.892282	2.55854	0.770205	2.18393	2.57075	0.592386	1.85746	0.523129	3.80074	4.03586	14.1252	2.842
LOC101926963	66.6696	0.878049	33.5522	93.7773	0	0.890474	0	0	1.10999	0.770364	0.0704096	0	2.07087	1.24252	0	0	15.6475	0.757938	8.65209	2.96134	45.6378	0
GMNC	2.37579	0	0.0523044	0.129342	0.42695	0	1.619	0	0.153669	0.114543	0.0166239	0	0	0.184687	0	0	0.0131775	0.0644682	0.0648736	1.85539	0.275713	0.995405
LYZ	0	0	5.2055	0	0.206363	1.25519	0.319632	5.11556	0.184244	1.08991	3.6455	0.222405	49.9602	2.98388	1.08189	36.4395	5.22397	1.3794	6.76671	2.40732	2.10228	4.25803
WDR1	0.0165811	0.523279	0.128421	0.182234	0.602909	1.05893	0.484475	0.144223	0.609345	1.02744	0.716553	0.424471	0.981735	0.752356	0.896449	0.231934	0.872248	0.345476	0.416779	0.443491	0.727823	0.307869
LCN6	0	160.855	0	175.368	0	2.82895	0	0	0	4.23684	0.342105	12.0395	0	2.13158	0	0	16.8158	2.40789	0	2.86842	1.73684	0
MSLN	65.3775	2.79315	17.0508	9.13855	3.01425	1.4828	2.76662	0	0	1.03619	0.0589584	1.34867	0.484933	0.442188	0	0	15.963	8.36472	0	7.77809	0.499672	5.35047
SNORD54	1.18907	0.256296	0	0	3.46435	5.7902	41.1346	35.4159	1.32158	0.78458	0.831654	10.1612	1.63541	2.28225	4.14258	4.37098	2.22821	0	0.308601	12.0337	0	8.56064
ITK	0.24088	1.24567	0.23171	0.0183411	0	0.0798859	0.073976	0	0.0692888	0.272162	0.0929285	0.163848	0.492358	0.668942	0	0	1.35123	0.0324027	0.441105	0.0222132	0.339719	0
ZHX3	0.0410809	0.481467	0.457277	0.282683	1.84365	0.84049	0.930315	0.498323	0.573047	1.03437	0.648449	0.475854	0.564445	0.491702	0.920775	0.090086	0.78867	0.48887	0.459831	0.378869	0.402902	0.469702
CHAF1A	0.314767	7.35648	2.70192	6.4426	0.432969	1.17991	0.721653	2.46472	0.83175	1.37236	0.45557	0.850356	0.321502	1.82542	0.766	0.251585	2.79849	0.973581	3.27969	6.387	0.805153	6.86775
CXorf21	8.20839	0	0.59371	0	0.844541	0.63283	3.02608	0	0	1.19662	6.10969	2.1056	16.4306	5.78752	14.3503	41.6587	0.264638	1.10228	15.3168	22.7911	0	0
MADCAM1	48.1792	17.8774	12.3208	0	0	0	0	0	0	0.811321	0.773585	0	0	7.49057	102.736	0	1.59434	1.72642	11.0377	135.5	21.2736	0
CYP19A1	0	0.06742	0	0.197947	0	0	0	0	0	0.0810402	0.0220193	0.0939794	0.292153	0.180241	0	0	0.0524378	0.0721871	0.0401796	0.0919363	0	0
GRIA2	0.777738	0.0501806	0	0	0.0450276	0.0203667	0	0	0	0.0907914	0.0408561	0.112262	0	0.308568	0	1.19992	2.026	0.0829391	0.0640447	0	0.0872333	0
OXSR1	0.362402	0.967005	0.108831	0.868193	0.763662	0.570202	0.681172	1.53448	0.894151	0.550863	0.610187	0.769358	0.545775	0.51187	0.352833	0.459976	0.434288	0.215996	0.708166	0.609151	0.847143	1.12667
AHCY	0.277913	0.683229	0.180102	1.15488	1.8969	0.439206	0.988718	0	0.682352	0.325919	0.343324	1.28956	0.655653	0.330742	0.218332	0.319738	0.581385	0.270854	0.0355556	0.302595	0.379187	0.822953
CYP4A11	0.0578803	0.173171	0.012797	0.0278476	5.75282	0.0021067	1.34919	0.280985	0	0.0145215	0.0111998	1.2165	0	0.224603	0	0.386711	0.0125226	0.0259663	0	0.007006	0.107971	0
ASCL5	0	2.74481	0	0	0	0	0	0	8.43983	1.60581	0.485477	126.448	0	0	101.39	0	2.1473	0	9.74689	4.07054	9.28008	0
ADGRL2	0.242646	0.101511	0.310141	0.196372	0.941697	0.479432	0.446714	0.543284	0.386409	1.05379	0.929598	0.441836	0.892604	0.644321	1.63733	0.681061	0.00731643	1.23287	0.228298	0.0725625	0.125076	0.389418
CAPN10	1.29307	1.04469	1.2909	2.21085	1.09535	1.34832	3.08907	1.84509	0.479037	1.01176	0.769281	8.0628	0.922124	2.7192	2.19384	0.879782	1.9112	1.61034	4.21929	1.65413	4.31881	2.11326
RNASE1	0.423772	0.0871648	0	0.168232	0.315085	0.112633	0.173612	0	0.632106	0.688064	0.138962	0.868348	0.562805	0.226055	0	0	0.346866	1.71747	0.188391	0.495154	0.569046	0.0811386
CDK9	0.239761	0.833358	0.676242	3.38391	0.588946	1.18724	1.66693	1.20359	0.477826	1.14303	0.914133	2.02677	1.08299	2.20962	1.04043	1.90539	3.11076	0.962955	2.49816	2.45504	2.41682	2.74414
RILPL2	0.665682	1.4565	4.42566	1.25417	1.24458	1.30075	1.69717	2.72916	0.667869	1.59222	0.766931	1.58314	1.42235	1.68843	3.16931	2.74447	1.40671	1.918	5.59574	4.43895	3.89941	1.44556
CDH11	0.13475	1.39215	0.263889	0.183705	0.322607	0.189316	0.0935518	0	0.136119	1.46546	1.77386	0.0540415	1.06112	0.727314	1.29472	0	0.652194	0.41447	0.310585	0.260056	0.133724	0.252916
ZNF69	2.15523	2.36874	3.63828	7.69816	4.65657	2.2749	2.7152	2.99059	0.64327	1.63707	0.934645	3.50331	3.52235	3.04091	2.12021	0.852367	1.4681	0.062219	4.81331	3.63216	2.21983	5.50893
LRRC45	32.6469	2.84599	3.16902	5.17654	0.993041	0.874144	2.71052	1.26031	0.726779	1.36229	0.88034	2.02694	0.62446	2.16175	2.13378	0	3.59906	2.32084	2.37074	2.29622	1.20203	0.822231
PCDHB9	0.152922	0.424909	0.0578504	1.53281	0.115028	0.593527	0.162788	1.68753	0.357193	0.509442	0.256291	0.531192	0.771115	0	0	0	0.170636	0.151577	0.0396881	0.0908117	0.88547	0
TNIK	0.738914	0.916296	0.150808	0.643272	1.06078	0.218399	0.952214	0.156614	1.137	0.526862	0.388893	0.290296	0.0715648	0.733524	0.125774	0	0.507821	0.344256	0.315351	0.237231	0.723598	0.230718
CCDC158	0.549505	1.55936	0.334177	0.316362	0.748644	0.253317	0.690725	0	0.0218012	0.174166	0.403729	0.0744333	0.152934	0.650295	0.764263	0	0.133004	0.215572	0	0.561463	0.110633	0
CYP2B6	0.402976	1.10268	1.15452	0.054667	0.842625	0.056552	0.0622072	0	0.0229636	0.0173084	0.0226208	0.424654	0.0281903	0	0	0	0.0197932	0.0156803	0.0274192	0.196304	0	0
CLPTM1	0.351866	0.18473	0.544947	0.0332313	1.31767	0.790265	0.621603	1.68855	0.64441	0.514739	0.489686	0.929295	0.517791	0.61331	0.350368	0.156682	0.0581979	1.42658	0.529828	0.348093	0.449976	0.354054
CTSA	0.0187796	0.429122	0.371021	0.0528142	1.54249	0.985819	1.35772	0	0.342631	0.526875	0.46178	0.888617	0.342439	0.80945	0.426506	0.484607	0.671963	0.991684	0.49251	0.579386	0.476429	0.407782
KCNJ1	0.0748555	0.75464	0.217008	0.107481	0.255493	1.71485	0.110446	0	0.0187052	0.443603	0.701056	0	0.583606	0.32416	0.0411896	0.221481	0.00974266	0.0388146	0.245421	0.029124	0.584872	0
ATP5D	0	0.300513	0.0399419	0.0376127	0.404768	0.528044	0.503156	0.379405	3.46442	0.433624	0.354172	0.0178574	0.1938	0.536714	0.234217	0.223606	0.0242412	0.597792	0.499058	0.0988196	0.406968	0.0487843
C20orf166-AS1	0	13.0675	2.83816	28.2593	0	0.398142	0	9.39315	15.2267	1.58882	0.329497	32.76	0.53044	5.57898	40.769	8.55318	0.949799	8.32728	8.30731	8.61434	0.423104	0
CCDC7	0.351144	1.11408	0.42036	0.152769	0.693411	0.66171	0.416274	0.345527	0.581928	0.637591	0.863739	0.194683	1.07681	0.589509	0.4455	0.691329	0.595794	0.890765	0.370353	0.177595	0.613825	0.0444282
LOC101929563	0.601778	0.326798	0.549735	0.0358181	0	0.0120704	0.0407585	0	0	0.0252636	0.0126318	0	0	0.186277	0	0.549061	0.92706	0.0268916	0.591729	0.253814	1.30163	0
CLCA2	0.767842	1.98382	1.04981	0.123721	0	0.0342002	0	0	0	0.0092201	0.0220854	0	0	0.0502817	0	0	0.896709	0.0980976	0.0189763	0.0434203	1.0973	0.250015
HERPUD1	0.151137	0.222275	0.0237511	0.236748	1.17874	0.743617	0.701728	0	0.882038	0.553149	0.852826	0.155833	0.959248	0.25668	0.207345	0.653156	0.12582	0.383188	0.51989	0.294865	0.504387	0.0431874
PDHA1	0.0889632	0.202366	0.373063	0.152319	0.875713	1.18377	0.527055	1.32023	1.58853	0.702508	0.509095	0.493173	0.582677	0.488174	0.289396	0.0903045	0.0284815	0.427396	0.739699	0.651293	0.12504	0.149724
NOX4	0.335211	0.0333713	0.163346	0.290185	0.933554	0.264162	0.660124	1.99966	0.0478338	0.109428	0.292198	0.231961	0.619358	0.14748	0.167418	1.34889	0.741517	0.0148837	0.952743	0.175	0.105543	0
LOC101927354	0	2.12051	0	2.04944	0	0.57252	0	0	0	0.0614831	0.0806552	0	0	0.0535498	0	0	0	0	0.268079	0.999927	0	0
CORO6	0.528273	4.96902	3.18203	2.20139	2.82029	0.966692	9.03563	7.74129	62.9698	1.49729	0.402789	3.83888	0.667699	3.21379	8.43532	0	0.589466	1.17196	6.01472	0.31371	2.58249	1.80635
PROS1	0.209058	0.186477	0.127266	0.197323	1.78422	0.438076	0.402336	0	0.331168	0.520712	0.771378	0.0406737	0.649935	0.168607	0.411093	0.195945	1.68171	1.48403	0.116731	0.0180031	0.842368	0.161361
CD274	0.958389	1.22463	1.34543	0.289981	0.102506	0.355749	0.283782	0	0.773485	0.197756	0.297692	1.83	0.389917	0.175682	0	0	0.247195	0.102204	0.0483806	0.0612317	0.107496	0.548817
CHRNG	56.462	71.7061	0	0	0	1.53694	0	0	12.7002	0.158994	0.192719	36.7757	2.40899	0	0	0	7.87741	69.22	29.3175	5.43951	75.2859	0
GFM2	0.64992	0.6179	0.941504	0.0613804	0.62391	0.348762	0.128718	0	1.07772	0.399611	0.407696	0.0855284	0.18845	0.11574	0.397058	0.303285	0.508064	0.48381	0.29153	0	0.146377	0
TGFB3	0.113772	1.44467	1.20895	11.47	0.753531	1.12721	1.85956	2.3797	2.9916	2.18502	0.981242	0.680797	0.92202	1.30704	7.921	2.17268	14.406	0.373513	2.44159	8.09082	0.166487	2.92237
KMO	1.66199	0.0796146	0	0.0944128	3.3373	0.0893814	0.107435	0	0	0.0398073	0.0554934	0.603917	0.138808	0.171956	0	0	0.0624486	0.0270808	0.0261929	0.447647	0.407248	0
CSRNP2	0.352234	1.82723	0.128965	5.86346	1.63932	2.72811	2.5874	1.09324	1.32638	2.39385	2.05179	0.575504	2.81274	3.30381	1.27207	0.195719	1.06944	0.70358	2.95306	4.39439	1.01069	1.21411
C14orf180	31.183	16.2178	64.3028	13.0593	0	0	0	0	20.0567	3.76933	2.01031	0	0	2.20747	0	0	1.21778	0	0	0.842784	3.85825	9.01546
MPP4	2.32642	0.0093696	0.384705	0.887687	0	0.0351636	0.144953	0	0	0.0515879	0.106042	0.100861	0.284285	0	0	0	0.532965	0.204588	0.0195108	0	0.0547846	0
FHL3	9.20418	0.479837	0.245645	0.176927	0.376366	1.2693	1.6196	0	47.7653	2.54807	2.90509	2.30164	5.69209	4.41213	2.30914	0	11.945	1.04656	0.0699021	8.90206	1.31669	5.37259
LONRF1	0.585248	0.882591	0.113564	0.504944	0.336896	0.494606	0.231772	0.897273	0.838644	0.746754	0.582801	0.7915	0.330254	0.214842	0	1.41255	0.269726	0.0456952	0.216191	1.01553	0.704505	0.679385
SNORD46	0.603217	0.156645	0.870931	0.0689391	7.06205	1.76139	43.1122	17.6561	0.466105	0.476829	1.85561	19.6258	7.58062	1.33014	5.14018	4.20643	0.0647262	0.258905	0.800077	0.877442	0	2.82535
SLC4A9	1.72013	0.44412	0.37435	0.307868	0.920239	0.270058	1.04518	0.28772	0	0.363378	0.0248879	0.0905673	0.57567	0.220244	0	1.04575	0.0488582	0.10131	0.64567	0.0875854	0.569592	0.18771
CCER1	1.02231	0.189143	0.0152258	1.82427	0	0.0259665	0	0.444146	0	0.0138685	0.110948	0.0539986	0	0.0135734	0.169727	0.689411	0.00997351	0.0107997	0.651819	0.40732	0.196755	0.214224
CELF4	0.867132	4.12149	13.84	1.29106	0.244449	0.363369	0.399706	7.31143	0.454212	0.257662	0.183336	4.68251	2.60305	0.165168	1.30813	10.7117	0.309415	1.67811	1.15012	1.66544	4.36704	1.28391
CDK11B	0.218757	6.40464	0.773672	3.74017	0.957171	1.49911	1.4518	1.10555	1.30752	1.4812	0.772183	2.26078	1.20184	1.80131	2.35237	1.63572	0.832326	0.331414	4.07493	4.46481	0.512541	4.93484
TMUB1	1.6574	3.60639	2.67702	4.41079	1.94945	1.85804	2.92602	0	2.09154	2.0242	1.00273	1.34869	2.71937	1.485	1.39868	6.16816	2.50624	0.279319	6.9205	7.72166	2.88113	10.5706
CDC14A	0.0434739	0.408923	0.0258804	1.35196	0.287935	0.302342	0.368764	1.29485	0.36972	0.927614	0.650452	0.0583265	0.924108	0.771248	0	0.700109	0.420014	0.0305338	0.424285	0	1.152	0.547887
ZNF474	0	0.20021	0	0	0.419307	0	0	0	0	0.28426	0.143547	0	0	0.152991	0	0	0.718678	0.638405	0	0	0.320147	0
P3H2	0.592823	0.0870241	0.314101	0.15086	1.98078	0.771378	0.653237	0.680661	0.0310897	0.542509	1.08336	0.430342	0.488231	0.299656	0.219257	0.0538164	0.146651	1.27699	0.442967	0.350947	0.383042	0.333841
TRIM17	1.74934	0.344809	1.79807	10.4202	0.651306	1.71065	6.83555	8.60721	0	1.39188	1.17131	2.83919	4.17825	1.60018	0	0.737229	0.751736	0.9857	8.38849	16.5527	0.0822037	18.1168
MIR145	11.6299	0	0	0	4.14098	1.87296	25.0276	10.8513	0.651714	9.84925	1.09724	47.9399	0.474367	11.9861	106.146	4.09484	0	0.263858	0.752643	1.03092	0	1.63073
PRPS2	0	0.0959376	0.0161883	0.0724081	0.0870905	0.729791	0.0455531	0	0.0559061	0.668175	0.480943	0.148644	0.650041	0.411923	1.63383	0.402511	0.0477492	0.272064	0.164769	0.234605	0.209193	0.070965
VTRNA1-3	3.30698	0	1.27308	0.164593	0.248569	0.663971	1.35481	29.6038	0	0.52681	4.42106	47.6592	1.26132	5.77476	3.62945	9.41764	0.558721	1.93369	0	2.53104	0.123725	17.6456
FAM78A	0	0.231786	7.09414	4.22599	0.481141	1.07903	0.74523	0	15.4464	2.33657	1.38448	2.31276	2.61709	2.61879	2.67489	0	3.06083	1.72735	2.79901	2.11895	1.00762	0.640955
S100A9	0	0.314333	0	2.21664	0	0.472982	0	0	0.397364	1.17578	0.527842	16.6433	13.5148	7.77381	0	263.089	0.6257	1.35667	0	6.70329	0	0
TMEM245	0.0840937	0.197125	0.208046	0.131728	0.977063	0.733005	0.343896	0.23522	1.08393	0.785993	1.02242	0.769485	0.750597	0.906482	0.915555	0.0603401	0.365482	0.694825	0.677721	0.416134	0.168527	0.131155
TOP1	0.653234	1.08803	0.0989505	0.453982	0.853893	1.20645	0.342783	0.245321	0.38451	0.922791	0.851709	0.537708	0.991799	0.647895	0.296155	0.213426	0.390368	0.974895	0.827896	1.04131	0.611194	0.447578
PLEKHB2	0.0234553	0.636389	0.0782073	0.051416	1.1913	1.07461	0.434852	0	0.365036	0.656852	0.690453	0.232902	0.83796	0.643095	0.282943	0.861553	0.61541	0.229463	0.285385	0.569221	1.12737	0.809381
CHD2	0.0710567	1.00407	0.516838	0.44879	1.07224	0.981222	0.535816	0.265565	0.518495	0.936437	0.864571	0.601669	0.739349	1.00407	0.496514	0.308136	0.352887	0.736183	0.850402	0.67351	0.492628	0.513046
ACLY	0.112715	0.407758	0.51377	0.346791	0.988503	0.874152	1.15209	0.226269	0.243886	0.681954	0.754427	0.400298	1.02028	0.546736	0.119501	0.180876	0.841554	1.22262	0.473118	0.474978	0.806605	0.0741898
SCARNA7	0.068405	2.06604	1.66765	2.76406	1.86812	0.980819	4.33799	3.72963	1.01823	1.09711	1.03742	3.94443	1.73964	2.35624	1.28288	0.270755	1.67505	2.94798	1.8283	4.11402	0.976247	5.0727
CCDC102A	2.66285	0.654639	4.34283	3.88951	0.732668	1.01965	1.75552	0	0.425689	1.30956	1.02132	0.940236	0.960646	1.51518	3.70763	0.857764	2.01862	5.30861	4.15206	5.25266	1.95864	1.36648
DCAF8L2	5.33819	11.4701	20.5628	2.89904	0	0	0.897527	9.30412	0.331319	0.349863	0.383242	3.94863	0.406731	0.846841	5.50261	0	1.23379	1.13118	1.00261	13.207	0.419093	10.6257
CRACR2B	0	2.69196	3.8543	6.10412	1.19941	2.10616	2.92994	7.23263	0.996885	1.04346	0.842555	2.80481	1.0956	3.51157	2.2774	0.879863	0.559618	2.32537	7.39159	3.32828	4.77935	8.98123
MMP17	19.8638	7.54557	1.32559	0.420868	1.8982	0	0	42.7425	1.0851	1.20105	0.602672	0.592652	0.470972	2.90743	0	0	1.42866	5.56291	2.99046	2.40496	12.3813	0
LINC00950	0	19.7082	1.5145	8.64747	2.30421	1.23966	7.38809	0	5.13375	1.10978	0.94511	0	0.579822	0	9.92192	0	0.48937	12.7317	0	0.829146	6.07074	7.15848
LINC00634	58.9418	4.97045	1.05545	25.3636	0	0	2.97	35.9836	0	0	0.621818	3.74318	0	0	9.72	8.10818	1.72636	3.74318	0.724091	0	0	14.85
MTRNR2L3	0	0	0.691598	0	4.64754	1.71977	8.6542	65.771	1.23566	0.152152	0.378074	10.9226	1.95953	1.3832	0	21.5963	9.31814	0.84375	1.47541	1.00512	0.608607	10.752
SIGLEC15	0	2.09483	16.0392	10.5447	0	0	0	120.985	0	1.65752	1.721	16.7092	0	0	0	13.9796	17.0337	2.24295	2.25705	1.53762	1.55878	0
SNORD24	0	0.812552	0.226548	0.271858	3.75164	1.61453	60.7632	58.0401	1.02702	0.513509	0.398725	8.80215	5.35107	0.347374	10.8094	6.65749	0.348884	1.82296	0.267327	0	0	9.32321
CRYGN	47.1344	14.8618	0	3.25376	0	0	0	0	0	2.3656	0.580827	1.16729	17.3064	0	16.4859	0	12.1748	21.4258	2.28665	0	2.0047	6.57519
AQP2	0.0518256	0.0236387	0.0718825	0.00354113	0.13905	0.225613	0.0894907	0.0405849	0	0.211205	0.00621322	0.00371575	0.0491738	0.31609	0	0.317305	0.00171371	2.93613	0.224127	0.0402194	0.129535	0
DKK4	0	0	12.9791	65.1488	0	0	0	30.8837	0	0.334884	4.6907	0	0.988372	0	0	0	2.32093	1.57209	0	0	1.15581	0
LINC00937	0	4.07692	0	0	0	11.6154	0	0	9.94231	6.86538	1.30769	0	11.2115	30.3846	0	0	2.21154	0	71.7692	71.9038	0	21.75
VSTM4	0.240724	0.913227	0.277235	0.807409	0.641932	0.102512	0.313205	0	0.345261	0.656171	0.403974	0.816857	0.195643	0.301665	1.51102	0.446896	1.88584	0.480841	0.44919	0.720958	0.225	0.157379
GLYATL1	0.294019	0.0105522	0.113188	0.022299	3.20419	0.0673949	0.093427	0.437818	0	0.0208058	0.03091	0.337074	0.0163759	0.278887	0	0	0.00323535	0.023842	0	0.0355889	0.0110002	0.116074
EDNRB-AS1	0	0.242563	0.171625	0.336384	0.909611	0	0	0	0	0.212815	0.451945	0	0.742563	0	2.71854	0	0.870709	0.209382	0.927918	0	0.387872	0
MYLPF	0	1.9833	30.9423	7.24946	0	1.33351	0	0	828.781	0.90194	0.0824353	28.2608	0	1.1153	0	0	0	0	0	0	0	65.9677
LOC100506188	1.25007	0.0669568	0.0814851	0	0	0	0	0	0	0.0104225	0.0214767	0.288988	0.184131	0	0	0	1.19322	0.707152	0	0.530601	0.0416901	0
FUS	0.632796	1.76622	1.41941	0.996912	1.19741	1.82829	1.62158	0.514302	1.0221	1.99112	1.85602	2.3914	2.47955	2.31371	0.936586	0.468668	1.60836	1.30991	1.55721	2.28664	2.47538	1.50048
HPD	3.95034	0.0897499	0.156285	0.316659	1.20063	0.0236626	0.542364	0.647992	0.152197	0.0319515	0.0139455	0.189637	0.063091	0.0159898	0	1.2805	0.0279471	0.0337997	0.0227105	1.16381	0.837769	0
NAV2-AS5	1.4342	0.00846108	0.0404141	0.553056	0	0.0113478	0	0	0.0361338	0.0320526	0.0879952	0	0	0.0790364	0.236512	0.567589	0.0168226	0.150607	0.0807286	2.24378	0.0131396	0
ASH1L	0.285616	0.445946	0.288225	0.410421	0.98156	0.85597	0.611941	0.205742	0.867884	0.956084	1.24596	0.221643	0.618004	1.23714	0.538012	0.62465	0.954547	1.04834	0.488209	0.404848	0.440938	0.369382
CDH22	13.2095	1.79835	14.7232	0	0.522216	0.252875	0	0	0.704522	0.332854	0.364611	7.96498	0.685703	0.445766	2.79456	0	13.4812	16.3004	0	7.16871	12.038	5.77496
ZNF205-AS1	71.5939	2.05344	3.76128	0	1.66752	2.25792	0	0	21.7498	1.4976	0.70272	0	3.16224	2.62368	0	42.7162	0	7.632	2.33568	2.0592	0	0
PKP4	0.60756	0.649422	0.291828	0.385989	1.24299	1.24912	0.634295	0.26089	0.189007	0.672466	1.07257	0.470062	0.55388	0.730535	0.123044	0.181461	0.462679	0.8362	0.614467	0.597355	1.18272	0.595475
SERPINF1	0.88414	2.59501	2.39039	2.2586	1.51921	1.35547	0.916083	3.18652	14.7869	5.22621	1.44706	10.414	0.503276	1.64654	16.0901	7.17029	9.77156	0.151005	2.35443	2.21236	0.0294862	3.30804
PLEKHA6	0.463521	0.90392	0.97756	1.01571	1.23942	0.600553	0.950857	0.432259	0.111345	0.520904	0.420847	0.888667	0.326056	0.856798	1.77074	0.106674	0.648741	0.23979	0.622584	0.476172	0.91848	0.603514
HECW1	1.01938	0.485491	0.305264	0.682846	1.16095	0.0227918	0.857115	0	0.0597207	0.0442468	0.0206621	0.464059	0	0.230636	0.0538302	0.819416	0.358936	0.0982356	0.405222	0.0255784	0.118603	0.222979
TEX22	46.1787	0	13.058	0	0	2.05866	1.48568	0	0.548431	2.60505	1.11323	36.0941	19.5819	1.40177	0	0	1.5573	33.8533	0	1.46317	0	4.77217
VPS13D	0.740299	0.739433	0.529251	0.508057	0.823064	1.05111	0.644218	0.223377	0.639648	1.03898	1.04731	0.624854	0.594723	0.909914	0.624269	1.32685	0.407617	0.553361	0.486897	0.245255	0.493241	0.451119
CYP4F3	0.487951	0.461301	0.773393	0.534738	2.43394	0.0106898	0.28763	1.86241	0	0.0467864	0.018645	0.60181	0.0163579	0.180185	0	0.384633	0.00323179	0.171733	0.130564	0	0.35689	0.306921
FBXL5	0	0.0831588	0.0395555	0.124941	1.07027	0.542197	0.376464	0.385728	1.17158	0.614112	0.873618	0.252422	0.83793	0.539296	0.491442	1.5198	0.284894	0.372011	0.224313	0.40581	0.194495	0
GAREM	0.391373	0.299125	0.747297	0.946107	0.858668	0.521677	0.859564	1.66988	0.336964	0.550253	0.974955	0.479111	0.599473	0.407644	0.794508	0.37703	0.662873	0.193541	0.62881	0.290189	1.86608	0.167681
ANGPTL3	0	0.0138274	0.212454	0	3.17526	0.638337	0.393674	0	0	0.0139901	0.00162675	0.806218	0	0.0263534	0.848025	0	0.0187076	0	0.19033	0.116313	0.289236	0
RPTN	1.16952	0.824731	0.693676	0.157487	0	0.00919877	0	0	0	0.0034911	0.0391225	0.0507041	0	0.0643914	0	0.193507	0.0233848	0.124073	0.239888	0.0396212	0.397764	1.3679
NEXN	0.553979	3.44221	1.47864	1.78834	1.42437	0.932956	1.66162	0.551078	12.7002	5.29221	0.661384	1.0186	1.43185	2.49692	8.06677	1.29665	3.22246	0.387908	2.87857	3.42421	2.93334	3.86693
TBX10	60.5567	0.421256	2.01211	0	0	0	0	0	0	0.163546	0.480727	20.2252	0	15.6162	0	30.6178	1.56112	3.35022	13.0143	30.2065	1.09526	36.56
EEF1A1	0.0425234	0.139755	0.293376	0.139755	0.55543	0.651992	0.197071	0.567371	0.0844161	0.642149	0.983472	0.32258	0.768154	0.751567	0.289731	0.768154	1.14052	0.687392	0.158203	0.203452	0.706662	0.204184
SAMD12	0.301095	0.816428	0.349752	0.580535	0.553338	1.13269	0.205591	0	0.0668533	0.551255	0.8619	0	0.354664	0.546735	0.567172	0.0778972	0.148484	1.03161	0.283291	0.0660279	0.402259	0.386814
CCNG2	0.591821	1.97872	0.4798	1.3532	1.6833	1.88086	2.69772	0	0.410349	1.31354	1.24859	3.15104	1.98574	1.45972	1.56956	0.817586	2.68779	1.28123	3.77133	3.25863	5.86578	6.16556
PRAP1	1.99524	0	0.339532	0	2.31267	0.0556929	0.1084	0	0.0541998	0.0277718	0.00253828	1.40546	0.0491232	0.0241883	0	0	0.149012	0	0	0.342071	0.0329977	0
IMPG2	1.49898	0.631336	1.43844	0.141402	0.0349134	0.078329	0.384168	0	0.123132	0.112398	0.225942	0.621326	0.107393	0.0862283	0	0	0.0601789	0.0191752	0.225038	0.866082	0	0
TNNT2	0.227487	3.85214	10.6145	5.61065	0.940063	0.537504	3.44877	3.51567	0.144572	1.43008	0.112068	3.95308	0.592074	1.46417	0.225176	2.66295	3.73572	1.14768	2.9906	3.19868	0.892887	7.43201
ECH1	0.139	0.0416156	0.220489	0.0406902	1.14499	0.545113	0.455649	0.894641	3.23002	0.57693	0.411393	0.456602	0.620996	0.493318	0.452165	0.161754	0.379249	0.602869	0.225851	0.229362	0.124901	0.200784
CBLN3	0	10.8112	5.76285	6.40202	1.23394	1.51583	9.34592	0	1.80289	5.49954	1.97017	0	3.75551	10.5117	14.4417	2.93254	5.57698	5.85991	0.330427	4.66831	3.44263	1.16785
DERL3	352.432	0.701857	19.6138	1.40371	0	5.37135	0	0	6.42653	1.28435	3.63342	0	0	17.3029	0	0	6.10186	0	0	5.39045	18.8546	0
APOA5	71.9093	3.33249	109.587	0	0	0	0	0	0	4.98741	0	0	17.7506	0	0	0	45.8161	4.14861	0	9.18136	2.99244	0
AEBP1	0.791709	1.14268	1.29402	2.59909	1.13593	0.725005	1.30122	1.56533	0.136224	3.6867	1.4888	0.709777	1.61233	3.1184	14.0148	1.06663	1.33104	1.62183	2.62927	2.43633	1.18993	2.09768
CEP131	0.398296	4.45348	0.902192	3.47829	0.640612	1.16829	2.25244	0.947972	0.612614	1.07907	0.679295	2.04709	0.523159	2.27544	0.618307	0.221492	3.93586	2.37543	2.12984	2.81054	3.81271	4.0675
ASXL2	0.290394	0.496512	0.421716	0.25038	0.627227	0.661193	0.471964	0	0.870534	0.636875	0.815012	0.331685	0.711148	0.798626	0.939888	0.603139	1.0957	1.20197	0.696289	0.527234	0.197454	0.179874
PTGR1	0.333608	0.257239	0.0387937	0.0342787	1.81128	0.52324	0.404304	0.223554	0.192097	0.73619	0.325469	0.252635	0.287567	0.213574	0.879662	0.864512	0.321697	1.94735	0.094311	0.383927	0.00392096	0.0692703
GPR174	0.251056	0	0.135907	0	0	0.0362709	0	0	0	0.0780044	0.017917	0	0.0718864	0.618354	0	0	0	0.147706	2.52804	0	0.155353	0
SH3RF1	0.651718	0.0619045	0.0164377	0.0181381	0.732611	0.644592	0.388836	0	0.427623	1.02723	0.781438	0.75419	0.467664	0.459	0	0.848727	0.0517423	0.10729	0.358188	0.432522	0.504062	0.599571
TMEM240	0	0.32197	54.8712	0	1.68182	2.04167	0	0	1.95833	1.90152	0.0984848	1.56818	1.60985	3.00758	16.8598	22.5114	0.875	2.56061	7.91288	4.27652	14.9583	4.28409
CNTN5	0.439988	0.975312	0.445253	1.00746	0.0501817	0.0430015	0	0	0.0289602	0.0271253	0.0852052	0	0.149987	0.213093	0	1.50657	1.31741	0.0962947	0.128366	0.134031	0.265987	0
XKR4	0	0.432244	2.80396	19.4004	0.960096	0.808249	0.583289	0	0.415372	1.3586	1.66551	0.332619	0.521425	1.39234	10.7828	2.54606	0.0923942	0	2.1098	0.574451	4.20595	0
WBP1	0	0.174056	0.177608	3.99974	2.49362	3.33903	15.594	0	3.70964	3.56282	1.77608	9.03789	2.33022	5.29272	8.47428	7.59571	0.372977	0.376529	1.90514	13.4982	0.401395	4.29812
GSTM3	1.71795	0.00792441	0.130454	0.902598	0.254217	0.778424	0.257618	0	0.141481	0.557064	0.362617	0.317911	0.464849	0.257394	0.934183	1.51468	0.696115	0.740521	0.227453	0.536879	0.124623	0.183532
BTNL9	11.1984	0.677468	0.407518	5.26845	0.737635	0.40613	6.18031	5.3227	1.46366	1.15267	0.473016	2.87555	2.48125	0.0955816	0.396492	1.80911	0.240597	0.316609	2.49527	2.2849	0.0728727	1.46344
ANO9	3.29345	1.95649	1.90124	0.987129	0.814257	1.18878	5.9647	1.96697	0	0.985175	0.405085	4.86511	0.700016	3.45833	1.9103	1.01307	1.05926	3.12626	2.15441	2.83169	7.15384	4.96336
MEGF6	8.59411	2.13791	5.01447	0.850407	1.05865	0.666001	1.97135	0	0.422411	0.990366	0.450852	4.27518	0.872169	2.6655	3.95024	1.93364	1.36269	3.65121	2.59475	2.4203	3.15694	2.88117
PSMG3-AS1	14.8349	2.22852	8.56649	3.32298	0.978828	0.922812	1.6625	4.04197	0.540819	0.63238	0.586712	1.91334	0.797055	1.36712	1.53	2.92996	1.08771	1.38984	2.48475	0.253987	2.30253	0.524621
GTF2H2B	0	0.772097	0.670711	4.98614	2.20711	0.829289	6.29116	67.9185	0.696707	2.14471	0.634315	1.07626	0	0.59792	6.17678	0	0.168977	0	2.10832	0.566724	0.881282	9.43674
TM4SF18	0.46144	0.0437075	0.305952	0.860578	0.245467	0.126741	0.140526	0	0.41303	0.236277	0.690129	0.723685	0.644712	0.111246	0.253909	0.896591	0.637125	0.325722	0	0.244826	0	0.120863
FOXP2	0.864913	0.8246	0.584074	0.527617	0.60367	0.430847	0.140909	0	0.990751	0.287044	0.756384	0.110535	0.356659	0.254197	0.166898	0.456322	0.678371	0.0705946	0.539841	0.802063	0.334916	0.052771
NTSR1	2.27502	9.12009	38.5886	3.84952	1.71127	0.553744	0	0	0	1.28762	0.0867309	1.38102	4.29318	0	0	0	4.26316	22.2565	0.590437	0.727205	2.37176	0
CNTN1	0.135731	1.75721	0.320438	0.254869	0.175348	0.240515	0.266467	0	0.114545	0.63634	0.322677	0.136018	0.135387	0.247003	2.94802	0	0.310103	0.299367	1.0564	0.0648226	0.455423	0
CCDC69	1.78742	1.44907	1.18503	2.48211	1.08249	1.02324	0.765201	4.04982	12.7409	1.09697	1.02427	10.3285	2.80232	3.32587	5.15278	0.463568	2.12679	1.80761	2.30848	1.33877	2.64361	4.43732
MAVS	0.358252	2.51585	2.11715	1.98573	1.66772	1.29934	1.38498	0.803659	1.19843	1.20994	1.1575	1.93639	1.60309	1.56136	0.635338	1.89825	1.32364	1.58907	1.41307	1.23907	2.58273	2.09245
FAM13C	1.24782	0.176952	0.121952	0.139601	0.21449	0.198149	0	0	2.12305	0.51022	0.544676	1.47995	0.54617	0.122232	0	0.2341	0.188718	0.404889	0.296477	0.569142	0.428514	0
PARP11	0.236393	0.469494	0.127969	0.91327	0.80855	0.414767	0.954829	6.14292	0.476077	0.901543	1.47637	5.40021	1.05893	0.885084	5.27203	0	1.72079	0.710618	4.6398	1.42	2.42092	3.8619
BOD1L1	0.108844	0.704619	0.580942	0.38507	1.00664	1.13733	0.454447	0.230214	0.506859	1.06687	0.934505	0.580001	0.94946	0.784616	0.598119	0.825078	0.383643	0.437355	0.881425	0.530521	0.306233	0.434465
TM7SF3	0.129981	0.022046	0.168336	0.576555	1.23843	0.427561	0.539675	1.19757	0.414858	0.480668	0.476857	0.495993	0.357858	0.54406	0.117852	0.560287	0.41707	0.857129	0.152929	0.123957	0.482184	0.148749
MYO1F	3.18129	3.03691	1.94516	1.44513	0.236224	0.594697	0.679048	1.72272	0.133773	0.837921	0.75152	3.07205	1.27134	2.99986	1.33236	25.5023	2.34195	1.77504	2.31374	2.21249	0.414471	3.16644
EBF3	2.27155	0.24382	2.35036	20.4554	0.556599	0.176503	2.92502	0	9.04023	2.21655	0.273374	31.4635	2.28633	0.562346	4.0883	15.7317	2.70501	9.36204	0.428532	0.586974	0.583691	18.3949
ADORA2B	21.3158	16.4436	2.03008	0	0	1.54286	0	0	6.11729	4.6015	0.541353	0	0	14.0887	0	47.2602	0.879699	20.4767	4.33083	0	0	0
SLC26A10	15.1749	0.387632	3.38749	7.66357	0.528969	0.252567	4.21963	0	0.890675	2.71802	1.83237	0.173117	2.64526	1.79891	2.52734	13.4224	4.25601	4.59095	1.09808	3.52381	1.39414	13.1799
RSBN1	0.0910177	0.900584	0.131412	0.542928	0.50496	0.68139	0.174523	0.43492	0.929709	0.721207	0.765357	0.336794	0.273226	1.05794	0.337892	0.237802	0.094485	0.153141	0.700749	0.528885	0.102749	0.568759
SMARCD3	0.231874	1.42418	0.405088	5.05907	0.801879	1.36552	1.40289	2.18935	5.35974	2.2067	1.36552	2.05921	0.993445	1.65588	0.950372	1.88038	2.22228	1.79809	1.14093	2.74461	0.664699	3.8278
C7orf55	36.1563	15.1676	0	2.27215	1.33671	1.27157	1.89172	96.0686	5.65171	1.26896	0.0260567	1.07875	0	0.422119	6.19108	0	0.169369	0.476838	1.36016	0.568037	5.8758	16.0848
ADARB1	0.122491	1.05241	4.26276	3.46855	2.26246	1.52495	1.58709	1.03281	1.19154	3.10178	1.23541	1.82227	1.30789	2.37375	6.51472	0.154144	2.17326	1.95246	2.68624	0.770253	1.89305	5.25808
LOC101928786	26.7053	0	7.79607	7.34144	0	1.39757	0	0	0	0.530402	0.0841908	3.4855	0	0	0	0	1.94481	4.03274	0	38.0627	49.3527	19.6333
LIFR-AS1	1.28382	1.49718	0.0408423	2.0561	0.377138	0.130675	0.412548	0	0.273724	0.214372	0.250989	0.321306	0.270404	0.143854	0	1.31017	0.543324	0.0920461	0.210147	0	0.136812	0
FGF14	3.79276	0.0918683	0.0523121	0.302147	0	0.0213887	0	0	0	0.0560487	0.117509	0.0533429	0.332298	0.0386543	0.306142	0	0	0.194946	1.13991	0.092126	0.290551	0
MOBP	0.156478	1.15416	0.346735	0	0	0.011326	0	0	0.026626	0.0299046	0.0926944	0.159756	0.20506	0.103424	0	0	0.0419261	0.0671612	0.0317923	0.300536	0.176646	1.1015
CTNND1	1.23289	1.17665	2.40373	3.33116	1.59493	1.80075	1.38371	2.06877	0.484843	1.6788	1.85367	2.25619	2.00152	1.74818	0.451118	0.534984	0.887457	0.793524	1.78726	3.59035	1.43985	2.11509
DENND4B	3.03043	2.04951	2.4538	0.79525	0.951474	0.914848	2.30306	2.22122	1.66251	1.26064	1.34802	0.582392	1.96608	1.80771	2.06318	0.823736	2.20686	2.75291	1.90538	0.900831	1.16574	2.98493
GBA2	0	1.01492	0.284448	0.180104	0.90601	1.20681	1.11383	1.15412	0.574967	0.741709	0.625135	0.299321	0.259263	0.874521	0.40628	0.651831	0.109747	0.248544	0.336097	0.375459	0.34182	0.395183
BIRC7	0	0.997016	5.90489	0	0	1.8094	0	33.5494	1.21858	0.903021	1.326	16.6371	0	5.30399	0	19.1414	1.88661	4.05185	1.07423	33.2473	2.3868	20.7225
LOC105748977	0	1.71141	12.5235	0	0	3.34228	14.6174	151.53	0	2.49664	1.04698	0	0	0	0	0	1.30872	3.68456	0	4.38926	0	0
SLC4A7	0.060323	0.634155	0.382147	0.0715878	0.385017	1.50853	0.340294	0.495375	0.782062	0.871356	1.45294	0.177916	0.936411	0.981225	0.20762	0.125622	0.291602	0.391153	0.762768	0.486552	0.403242	0.0711909
LOC101928936	1.48726	1.44489	0.0888634	0.978875	0	0.109874	0	0	0	0	0.0978186	0.142595	0	0	0	0	1.1349	0.315155	0.110218	0.0750861	0.045465	0.389552
LDLRAP1	0.87917	0.722169	1.09849	2.80036	2.22728	1.6764	1.73717	6.00545	1.74784	2.35381	1.08833	0.853175	0.513695	2.89711	3.94223	0.758837	0.492865	0.746442	2.16324	1.70497	3.11109	4.05138
TOX3	0.0557291	0.124941	0.0122571	0.362729	0.851543	0.383485	0.865925	0	0	0.81085	0.320728	0.553368	0.243835	0.129108	0	1.11728	0.00939713	1.2624	0.170701	0.36943	1.35049	0
EVA1A	0	0.534265	0.21955	0.034355	1.51446	0.527747	1.40924	1.66575	0.0933258	0.193323	0.445387	0.928197	0.213568	0.40206	0	0.19225	0.185195	0	0.0621917	0.231973	0.66325	1.34337
SLC37A4	0.385429	0.0822844	0.622542	0.238889	2.1776	0.452645	1.62825	0.767683	0.630076	0.350933	0.347543	0.364441	0.308365	0.335703	0	1.47208	0.0302445	0.689542	0.265796	0.0607581	0.38629	0.462547
MORN2	0.172	0.179818	0.0650675	0.219918	0.974752	0.989632	0	0	0.872359	0.456734	0.648406	0	0.350053	0.229754	0	0	0.106428	0.170487	0	0.102141	0.0854957	0
INVS	0.175192	0.848474	0.393895	0.172138	0.863966	0.651637	1.23493	0	0.550762	0.986751	0.891453	0.0405005	0.550452	0.841701	0.501984	0.596397	0.671334	0.152884	0.441521	0.438379	1.0774	0.160674
KCNIP2	0	7.19971	3.51337	0.21368	1.27263	3.41089	0.527659	7.26367	2.61794	2.26835	0.830736	5.54769	3.74085	3.67908	0	1.44052	3.13833	0.348139	0.589437	0	2.42316	6.24687
KIAA1875	2.73371	5.93263	6.14968	10.1264	0.601037	0.515525	0.949425	7.95749	0.491794	0.583648	0.133177	4.59615	0.967223	1.20616	0	5.12477	2.08215	0.974587	2.57067	3.26049	1.93015	1.26283
LAT	3.43508	0.849691	0.115684	0.0807094	1.46936	1.10886	6.58051	0	0.369918	1.56487	1.49626	3.81352	0.224193	5.00937	1.99577	2.77013	5.94604	0.410273	5.18782	7.70775	0.0591869	6.64015
LRRC47	0.194625	4.73875	1.659	3.07094	1.36674	1.53642	2.56964	0.619605	2.95774	1.34673	0.935088	1.68634	1.02384	3.04138	1.00169	1.03339	2.18327	0.66291	2.1785	4.43504	3.39359	3.19089
RTN4	0.711809	1.71197	2.17628	1.37428	1.18388	1.09897	1.15655	0.843515	1.86042	1.06769	1.18056	1.26389	1.56974	1.06227	1.26389	1.22786	1.65999	1.96208	1.46571	2.01533	4.49995	1.85474
NCMAP	5.73304	24.3206	0.494921	12.3255	0.705811	0.804551	2.28809	0	0.326696	1.76757	1.82852	11.4746	0.86794	0.696059	8.29053	0	1.99309	1.47135	0.390085	6.43275	8.7501	13.5152
SLC25A28	1.38444	0.232707	0.327848	0.976264	0.866563	1.1191	3.54056	0	1.87019	1.68919	1.29683	3.97861	0.989066	2.32682	1.25014	15.0285	1.49665	0.120244	3.15447	6.47236	4.14881	2.47066
IL17REL	36.05	9.25271	178.842	2.18182	0	0	0	0	0	0.3603	0.100083	14.5822	6.96831	0.405338	0	0	13.5138	37.3311	0	9.3553	16.3361	0
EPHA7	0.602623	0.566267	0.0476174	0.199983	1.3607	0.165273	0.493864	0	0.0137813	0.545595	0.518906	0.43735	0.0713747	0.288121	0	0.162959	0.400686	0.540555	0.163267	0.664638	1.44415	0.317432
ARTN	78.5096	0.55034	0.752316	9.31872	3.13897	0.398394	2.43669	13.9456	1.26004	0.266831	0.357628	1.69549	5.93329	0.300185	4.40272	7.62508	0.313156	7.20074	2.168	3.11303	0.244595	0
ACSL1	0.101646	0.635294	0.126298	0.593313	1.31976	0.962584	0.43731	0.157124	1.44119	0.330981	0.764544	1.41961	0.670604	0.404369	0.482669	0.297515	0.22485	0.0946916	0.38758	0.596634	0.560117	0
MIR210HG	13.4238	5.78965	1.96094	6.01835	1.08635	2.38235	0	0	1.26847	1.80847	1.42729	1.93765	6.78071	0.343059	0	0	2.11341	0	16.4435	25.5981	15.2005	15.6219
SSBP3-AS1	14.794	2.72961	0	3.78541	0	1.46781	0	0	8.75536	4.59657	1.77682	0	0	0	0	0	5.43348	0	33.8112	0	2.84549	79.4807
FLVCR1	0	4.24642	2.87271	3.38974	1.15455	1.35282	2.78642	6.47358	0.519787	1.21444	1.53985	1.95178	3.32687	2.8555	3.05584	0.727243	0.756158	0.608139	2.41879	5.00326	3.03129	3.12193
LTC4S	0	0.303371	0.532447	9.16097	0.916304	3.24008	9.57785	29.4393	2.63953	2.76129	0.639762	0	1.61591	5.51227	0	7.2066	0.870901	0.377666	1.6737	0.449897	0.272415	7.4914
POLR3B	0.107005	0.020178	0.0887289	0.130308	0.40621	0.70888	0.355391	0.597595	0.799443	0.531558	0.798492	1.52639	0.899042	0.0387934	0	0.134656	0.0286704	0.354236	0.109314	0.254025	1.01223	0
LOC283335	13.1257	0.819321	0.892177	12.2898	1.75726	1.51798	2.17062	0	0.7889	2.94265	0.897035	1.48986	0.575953	1.43234	5.27075	0.892689	0.255127	2.9153	2.26163	2.15426	1.33827	3.4777
GGPS1	0.895371	0.0838352	6.73363	1.92962	0.910331	1.62787	1.47657	0	2.76769	1.38455	1.863	1.91155	1.45286	0.662495	0.811818	1.16155	4.85566	0.427079	1.71763	4.85228	2.88907	10.3349
RGR	0	52.9266	6.70459	91.7505	0	0	0	0	0	3.63303	1.60183	0	0	4.95413	0	346.178	27	0	5.2844	0	22.4587	0
P4HA2	0.0341973	0.00737097	0.0882009	0.310884	1.26545	0.413175	0.682491	0	0.483375	0.523639	0.395976	0.426463	0.069598	0.337059	0.589778	2.29287	0.510352	0.0159454	0.159203	0.056611	0.867568	1.00496
VWA8	1.28666	0.0340141	0.0492435	0.316569	1.00886	0.89481	0.45313	0.210692	1.86196	0.561387	1.0132	0.443695	0.468135	0.675719	0.728966	0.13852	0.581208	0.0966953	0.121191	0.277264	0.437453	0.172814
TUFM	0.0267572	0.284689	0.188651	0.294073	0.832315	1.11495	0.440458	0.283058	1.49067	0.684231	0.666229	0.198059	0.729338	0.562088	0.191585	0.185065	0.784692	0.515816	0.29263	0.0870716	0.0115738	0.286319
TOM1L1	0	0.207735	0.358869	0.369268	0.642815	1.26315	0.475587	0.601911	0.142072	0.571358	0.852976	0.0205011	0.388482	0.387987	0.546152	0.124146	0.0809646	0.450431	0.329603	0.149797	0.0167872	0.0560067
CD99L2	0.0520257	0.498614	0.129634	0.251571	0.874703	0.538505	0.504727	0	1.51083	0.82236	0.523427	1.01729	0.392253	0.494131	0.814662	0.212088	0.490373	0.49712	0.662706	0.204707	0.150961	1.22385
FLT3LG	5.54119	2.67476	0.449892	10.6838	1.0929	0.526561	0	0	1.50663	1.51531	1.87117	6.15165	1.07627	4.26457	8.39098	0	15.5451	3.13622	1.51097	2.18798	4.23997	2.62557
EIF4E1B	13.4538	0.714749	31.0259	9.32577	0	1.04538	0	0	0	0.418152	1.38088	72.4425	0	4.4295	13.9838	0	108.229	27.5932	2.53809	48.1556	19.201	5.49919
PNMAL2	6.36865	3.30897	16.8317	7.79991	0.559157	0.624576	2.81612	0	0.881833	1.67261	1.06306	1.41182	1.6925	2.17475	15.915	0	2.91248	7.07234	4.65891	4.72212	3.50611	11.4444
LRFN1	21.443	4.79747	20.5089	4.8557	2.28101	1.36456	0	0	3.23797	1.60759	1.85063	5.99747	0	0	6.01519	0	3.23544	43.1848	4.07342	11.4456	0.858228	0
STX2	0.529552	1.98766	0.0420987	1.382	1.60608	1.65803	3.86613	1.94639	0.560245	1.87122	1.50892	2.42959	2.43001	1.6854	3.03287	1.7443	1.64278	0.316051	5.92939	4.85774	4.46112	4.24388
SYNDIG1L	78.8183	12.6235	2.21767	0	2.03326	0.273018	1.73869	0	1.23816	0.598723	0.584353	11.8691	9.17004	1.1232	0	0	1.34593	9.30655	2.80202	0	33.7847	0
FAM195B	0	1.54054	1.14851	0.800316	1.12011	1.31808	4.64097	9.4869	0.962066	1.3755	1.72431	0.657292	3.34017	1.68151	6.77274	1.45514	0.888599	2.54294	2.16902	3.40602	3.40108	2.28159
LOC407835	7.44492	0	31.3218	0	2.37797	2.85097	0	0	3.88121	1.06911	0.110151	2.68251	4.61339	0	0	104.138	8.28078	7.82073	71.5659	0	4.60691	0
DLX1	166.647	14.0685	0.688612	1.19573	0	0	0	0	0	0.168149	0.758007	0	1.73221	0	10.3852	26.1032	2.03114	2.44217	0.854093	3.01335	21.1708	6.2242
UBE4A	0.210359	0.323439	0.772883	0.182104	1.13451	0.914571	0.475408	0.22105	0.887667	0.864904	1.09779	0.518055	0.984828	0.616098	0.56458	0.0736345	0.298944	0.666029	0.386236	0.154994	0.365676	0.0684944
CELSR1	0.825003	0.568787	1.17155	0.298024	1.47611	0.727096	0.989414	0.260694	0.00957026	0.46327	0.645836	0.594435	0.605316	0.675312	0.201729	0.304636	0.62912	0.719173	0.575503	0.570956	0.739102	0.351884
SEPHS2	0.34695	0.336121	0.135457	0.0744434	1.45576	0.591433	0.432649	0	0.425119	0.373692	0.74913	0.0355139	0.435987	0.575869	0	0.479302	0.187661	0.0185914	0.0454112	0.469172	0.835916	0.239593
MLEC	0.336706	0.585662	0.0952105	0.484513	1.69469	0.925039	0.845943	0.586378	0.850553	0.868309	0.715086	1.10798	0.887408	0.625277	0.436423	0.457983	0.179409	0.338347	0.60958	0.23781	1.53356	0.318323
BEND7	0.203584	0.104634	0.0349642	0.0155014	1.52017	0.511372	1.21462	0	0.796339	0.584487	0.544442	0.35145	0.721071	0.435933	0	0.84224	0.0363421	0.0157597	0.027558	0.0615748	1.21488	0.0974002
IRAIN	86.3339	2.58862	7.18756	15.9412	0.814143	0.682491	3.74845	0	0.417572	1.01768	0.287535	5.46962	0.524186	1.15499	5.90658	0	0.453917	5.38885	0.65503	16.4242	1.43606	2.93189
CD200R1	0	0.104554	1.12149	0.144994	0	0	0	0	0.132172	0.0813743	0.0680585	0	0.209601	0.0798948	0	2.02943	0.113924	0.451258	0.399967	0	0	1.15009
FAM177B	3.18951	0.93261	0.141212	0.120018	0.0411835	0.0432708	0	0	0	0.0349217	0.035885	0.397866	0.387912	0.0458397	0	1.35047	0.478628	0.073456	0.623372	0.489305	0.757439	0.291415
TRAF2	2.33168	1.39544	1.38805	0.251027	2.22727	1.48376	2.96077	2.88877	1.24578	1.6171	1.21555	0.694784	1.5749	2.12481	2.55856	0.545342	2.88464	4.30945	0.811814	1.32583	0.217093	10.3954
TMEM127	0.46738	0.480156	0.0766976	0.0278187	0.751846	1.11375	0.462061	0	0.445099	0.960181	1.0282	0.769069	0.647155	0.660759	0.899006	0.0864211	0.0331819	0.373067	0.52873	0.431844	0.0593	0.269161
UGCG	0.513029	1.59381	0.399779	5.42305	1.77762	0.956503	3.55875	2.35455	0.332015	1.06753	2.21186	3.88482	2.95798	2.54007	0.232446	0.250139	1.08644	0.247417	1.57555	4.49721	7.94801	5.30249
OPRL1	2.26494	7.5786	11.5904	2.11882	0	1.05941	0	0	0	1.81993	1.24539	22.49	0	3.02546	0	0	19.8	1.05609	22.1048	0	4.51661	0
GOLGA6L4	0	17.4373	0.407732	0	9.08155	3.2238	3.57445	20.4573	3.11235	7.17336	0.413168	0	0.894292	2.47629	0	0	0.312594	0.864391	2.20447	1.10088	0.358804	13.3464
LINC00540	0	1.18351	0	0.541112	0	0.0606564	0	0	0.232751	0.0705307	0.100436	0	0.119902	0	0	0	0.119056	0	0.147268	1.48876	0.140215	0
SNORA63	0.519961	0.298546	2.21654	0.944275	2.13887	1.16523	9.86592	3.22309	0.208944	0.536119	2.38162	3.60603	2.56397	2.05656	1.10643	2.25178	3.274	1.76275	1.06655	1.15715	0.533896	1.87052
COL19A1	2.58693	0.725711	0.60502	1.40272	0.326208	0.0349197	0.026408	0.950324	0.0371749	0.0140406	0.0587087	0.277648	0.0181873	0.162595	0.241419	0.364256	0.370221	0.259169	0.157466	0.00792968	0.513137	0.776017
COPG1	0.21902	0.848901	0.299129	0.0734892	0.810269	1.11597	0.677539	0.286277	0.606118	0.879414	0.716429	1.07092	0.676659	0.710973	0.868114	0.822009	0.360309	0.649172	0.228768	0.294784	0.4474	0.159623
FLNC	0.842353	0.639732	5.48406	2.06415	0.284831	0.451031	3.93322	1.61124	24.8086	0.346738	0.26144	1.2859	0.378868	0.995104	11.8415	3.50877	2.08561	2.13134	0.52199	0.59656	2.50079	4.95511
FANCG	2.15723	9.52841	2.55996	2.30676	1.13939	1.79991	2.12879	35.7032	0.70501	0.895826	1.2481	0	2.81545	1.07655	3.20442	0	3.8365	0.219714	0.53667	3.54202	1.52928	7.43219
RALYL	0	0.183775	0.0226883	0.226127	0.522134	0.400373	0.283906	0	0	0.0960472	0.0261672	0.243219	0.0981648	0.157457	0.359383	0.379197	1.91625	0.0276797	0.0484017	0	0.987547	0
TIMD4	0.100941	0.043958	0.0920603	0.129062	1.22135	0.453493	1.49354	1.30187	0	0.325911	0.962933	0	0.2636	0.0340416	0	0	0.189153	0.223934	0	0	0	0.167396
C4BPB	0	0.516019	0.143617	0.355146	0	0.177573	0	0	0	0	0.0695819	0	0	0.0901781	0	0	0.175346	0	0	0	0.395782	2.73318
KCNJ15	0.274197	0.491048	0.341873	0.431973	3.36419	0.237924	2.01774	0.469143	0	0.493555	0.378121	1.28517	0.122736	0.62128	0.0505521	0.929634	0.307509	0.588917	0.143497	0.367143	0.0761594	0.243874
HCG4B	0	1.33099	31.5996	0	7.68712	10.7384	0	0	2.42656	7.28873	6.10262	0	0	9.42555	0	0	14.8038	0	14.5684	82.8652	35.7555	0
PSD3	0.483267	0.599838	0.218395	0.812545	0.304853	0.353271	0.34087	1.48671	0.175126	0.931326	0.704331	0.869995	0.650144	0.481758	0.289863	0.407378	0.892964	0.934211	0.496019	0.777687	0.106461	0.331461
DOK1	27.5707	0.824474	8.49446	5.06017	0.348111	0.216467	0	5.10699	1.1848	1.80366	1.01787	0.280932	0.483149	1.27573	0	0	8.59692	3.23275	1.09183	1.55463	0.677222	35.8365
FHL2	0.607195	1.88636	0.19279	7.14976	0.353787	1.35953	1.51638	0	1.41252	2.76934	4.639	0.798035	2.90296	2.29839	5.59599	2.51814	3.37891	1.04763	3.05522	3.2074	4.64883	2.67218
FNDC3A	0.0137955	0.543649	0.336453	0.314586	0.819316	0.875732	0.391777	0	0.514905	0.951325	1.19349	0.190407	0.821521	0.743583	0.599033	0.448395	0.523926	0.728493	0.434458	0.396186	0.624419	0
MYBL1	0.378772	4.80963	11.8941	7.01339	1.07134	1.785	0.403209	0	1.25795	1.28072	1.53786	0	7.29608	2.48257	0	5.8793	2.39815	0.101635	4.00321	3.83326	1.85165	11.131
PRRT4	80.1656	1.78647	1.55846	108.256	0	0.285635	0	0	3.04928	0.851893	0.0250557	0	0	0.94961	0	11.0445	1.90674	9.73664	12.375	24.8151	6.89532	0
KRT73-AS1	2.66638	8.92181	0.586447	11.1112	0	0.445699	0	0	0	0.645091	2.76021	22.7854	11.6664	0.633362	0	0	12.8823	1.24327	1.25109	2.7954	0.864031	9.11729
EGFR	0.159937	0.92586	0.120491	1.02571	0.702137	0.649567	0.795644	1.15049	0.392252	0.860412	0.858335	0.591389	0.735578	0.498656	0.529756	0.141923	0.625454	0.769076	0.69702	0.667525	0.795644	0.997218
PKN3	0.877995	2.71053	1.37373	3.82803	0.778799	1.32475	4.12069	4.81728	0.639728	1.43674	0.939038	1.43453	0.872087	0.892025	2.06441	0	2.50525	1.98195	4.15712	1.69888	0.175008	5.25123
IDH2	0.218363	0.0104603	0.281649	0.209108	0.4746	1.2529	0.932771	0.872265	2.83259	0.339375	0.477905	0.362181	0.296426	0.217216	0.996855	0.205822	0.151499	0.230767	0.54127	0.279258	0.418741	0.525521
NARF	5.18812	5.20694	4.50124	4.97817	0.729098	1.12721	2.43479	1.54291	1.8583	1.12208	1.15868	1.06731	0.708845	1.52941	3.56742	1.31975	0.410569	2.55859	0.685359	0.656264	1.25595	1.16905
SUV420H2	0	1.74457	0.841391	1.05155	2.13012	1.93143	2.73434	2.78466	0.77072	0.953133	1.10816	8.66959	1.94179	1.7664	0	1.05081	0.472866	0.828441	1.82745	5.89714	7.28651	7.89369
LINC00548	0.34278	0.956146	0	0	0.172733	0.0641408	0.216587	0	0	0.0429594	0.0847255	0.123508	0.672136	0.0483294	0	0	0.125895	0	0.947196	0.336814	0	1.4648
LINC00691	4.53155	25.3002	16.2016	0.709904	0	0	0	0	1.78265	0	0.761174	40.638	0	4.58282	0	56.6148	1.24233	17.1008	6.34575	0	0	79.0438
COX7C	0	0.00238715	0.0322378	0.0698129	0.380661	0.704806	0.243062	0.0847439	1.97398	0.255391	0.394995	0.276696	0.424327	0.252047	0.236542	1.10366	0.805709	0.869554	0.0235224	0.186367	0.608532	0.211364
HSPA8	0.018176	0.0953941	1.10979	0.0747016	1.13331	0.761334	0.350221	0.515164	0.817079	0.5919	0.657624	0.298237	0.982624	0.490867	0.380185	0.28002	0.66307	0.490077	0.337555	0.201268	0.661803	0.128288
ACD	0.869971	4.4989	3.60353	0.108194	0.439769	1.31452	1.31121	4.88714	0.833538	0.947988	0.807777	5.48295	1.3723	0.92554	4.32851	2.09838	0.367272	1.59568	2.44946	5.86531	0.124755	2.27171
SLC25A22	9.26818	7.04769	8.55816	0.288528	2.43304	1.30109	2.88121	0	0.233807	1.04286	0.959198	3.06256	0.764283	0.783729	0	0.896337	10.704	21.2688	8.5749	2.04457	0.80408	5.01397
TLX2	249.321	1.10481	1.34453	106.515	0	0	0	0	0	0.328315	0.0885929	30.3717	0	0	0	0	25.1969	2.49624	4.2264	11.9392	9.26578	128.642
PRSS21	0	11.1335	137.796	24.5971	0	0	0	0	0	0.240291	1.25971	0	2.39563	1.17961	0	0	1.23058	0	3.80097	5.20631	9.90291	0
WNT3A	39.3519	57.6832	22.0608	38.7509	0	0	0	0	0	0	0.0770548	86.494	7.22774	1.77226	0	0	0.88613	2.45034	9.01541	1.67979	3.82962	0
FBXL19-AS1	0	0.464728	0	8.11546	1.81918	2.13619	7.33458	13.2119	1.32767	1.68701	1.70084	0.357616	0.94846	3.13043	3.08984	0	8.25108	6.56407	2.26836	0.975238	6.85171	2.0144
AKR1A1	0.0864513	0.382887	0.325436	0.226733	2.59928	0.350157	1.94607	0.36548	0.287257	0.474458	0.418689	0.716258	0.330007	0.978282	0.105175	0.31483	1.10609	0.190675	0.617629	0.282393	0.167819	1.02162
SUPT3H	0	0.0150874	0.233393	0.0459807	0.354298	0.770792	0.0745133	0	0.311396	0.39802	0.732817	0.598159	0.6192	0.223335	0	0	0.740925	0.488955	0.269521	0.235138	0.537297	1.92657
ESRRG	0.398958	0.683528	0.430718	0.964443	0.672867	0.727167	0.265935	0	0.420362	0.426537	0.731238	0.386276	0.14252	0.289111	0	0.195796	0.215761	0.0253364	0.405271	0.14612	0.500414	0.940934
AGPAT3	0.0689465	0.369403	0.411332	0.383553	2.13323	0.755804	0.822316	0.425395	0.924736	0.671707	0.533575	0.659926	0.844638	0.684901	0.460107	0.398899	0.358926	0.846073	0.875199	0.547595	1.33798	0.607216
IL6ST	0.0266279	0.194973	0.108139	0.131729	0.74273	0.571608	0.351083	0.54778	0.504154	0.896824	1.47355	0.67438	1.35749	0.666056	1.0176	0.47716	0.517419	1.1386	0.326963	0.305142	0.14701	0.184275
MS4A4A	0.33064	0.071267	0.301551	0	0.304945	0.409664	0	0	0.129929	1.43261	0.204105	0.200711	1.61102	0.765999	0	0	0	1.88397	0.0858112	0.81448	0	0
LAMP1	0.041015	0.49245	0.279674	0.104385	1.12258	0.906337	0.760729	0.421629	0.403571	0.676478	0.6041	0.568378	1.06469	0.467875	0.657548	0.0411396	0.089627	1.02828	0.709315	0.575082	0.680401	0.336319
APOBEC3D	32.2361	0.276222	6.74	1.78382	1.1765	1.10303	1.223	0	2.45159	2.05632	1.25369	6.29823	3.29513	6.68699	0	0	0.157177	2.46461	6.19035	0.376666	4.26795	10.3114
CTSS	0.180229	0.739582	0.204856	0.100075	0.24658	1.58928	0.558882	0	0.304617	1.03024	1.65924	1.61626	7.29637	1.71178	1.42677	58.7037	0.37881	0.415672	2.29576	0.474493	0.353713	3.34639
ABHD2	0.278983	0.0918601	0.3347	0.386319	0.593936	0.755051	0.35035	0.46628	0.318827	1.17312	0.955911	0.873167	0.755051	0.48352	1.01376	0.14164	0.148099	0.935815	0.206126	0.559929	0.629383	0.497853
SLC26A7	0.389689	0.0882064	0.321962	0.0665731	0.476049	0.407515	0.108282	0	0.098129	1.07532	0.0388824	0	0.0336327	0.0525547	0	0.270215	0.139319	0.027633	0.0184605	0.0412476	0	0.0652462
IGF2R	0.151511	0.540584	0.538243	0.671076	0.984308	1.03926	0.616873	1.10611	0.890389	0.780893	0.807365	0.596774	0.556331	0.776904	1.06414	1.19231	0.703202	0.462851	0.451238	0.405225	0.724653	0.19891
HACD3	0.0262338	0.00815479	0.158018	0.0902027	0.809555	1.02089	0.116167	0	0.288726	0.781359	0.716352	0.0618533	0.85633	0.472208	0.418894	0.0762396	0.253452	1.47075	0.298688	0.11636	0.305112	0.139631
SGMS2	0	0.641605	0	0.204107	0.773495	0.772655	0.186997	0	0.25512	0.481374	1.08036	0.167631	0.887593	0.0986681	0.273594	0	0.283461	0.11751	0.0614051	0.362238	0.495177	0
BDH2	0.86402	0.331579	0.277477	0.0734375	1.75825	0.941516	0.561923	0	0.279545	0.424352	0.98953	0.463445	0.678244	0.494267	1.00473	0.145382	0.10962	0.0183402	0.20986	0.409037	0.598297	0.670739
SHF	2.53072	4.54566	0.118391	0.292765	0.364809	0.697038	2.92352	4.0363	1.28945	0.906746	1.22704	0.419875	0.503849	3.15984	6.62209	0	8.21119	5.67037	2.79228	0.518075	11.1696	1.66573
SIX3-AS1	11.0794	37.0722	0	90.2599	0	0	0	0	0	0	2.03069	6.72563	0	0	0	0	2.74549	36.3736	33.9368	0	128.859	18.3736
GGACT	1.12449	0.50321	0.145389	0.872335	1.90498	0.0766198	0.206465	0	0.26707	0.184955	0.081644	0	0	0.471023	0.37305	0	0.0662573	0.0287324	0.127333	0	0.0780329	0
FASN	6.97587	1.27156	4.26124	4.44237	0.885147	0.891015	1.03343	0.954386	0.252158	0.919033	0.729386	10.1283	1.16883	0.732571	1.29629	0.780627	1.02302	1.66445	0.996143	1.14775	1.34642	1.08542
ARHGEF12	0.00414404	0.241411	0.496786	0.381482	1.12799	1.10954	0.461337	0.250198	0.577425	1.05367	1.25614	0.490953	1.08666	0.779347	0.726525	0.379647	0.721099	0.503051	0.35547	0.318769	0.64328	0.106445
PRRC2B	0.108001	0.434775	0.479976	0.625665	0.75232	1.00132	0.709097	0.295317	0.410271	1.08077	0.792833	0.625665	0.770773	1.16234	0.700156	0.938751	0.518892	0.419489	0.652592	0.607886	0.810873	0.448052
TCEAL3	1.47703	2.62759	0.862308	2.65228	1.29149	1.76177	1.90387	2.31219	0.75448	3.02526	1.15194	1.87747	2.30793	1.94868	5.70107	1.90004	6.81948	4.14336	4.01126	4.16049	1.17291	1.44807
KIAA0368	0.133278	0.569221	0.482929	0.320349	0.923965	0.773043	0.976922	0.769181	1.69974	0.941014	1.03619	0.542254	0.684587	0.91416	0.204176	0.944437	0.582577	0.288331	0.401462	0.203214	0.633327	0.317024
PRKCSH	0.0860618	2.28395	2.8867	2.04848	1.32561	1.61373	1.98745	0.783266	0.461382	1.78739	0.962426	1.36752	0.977872	1.58551	1.32561	0.306558	1.8716	2.10333	2.25666	2.36529	3.33582	1.88726
ECSCR	0.441232	0.412248	0.38906	0.762068	0.320166	0.224741	0.209245	0	0.968191	0.32273	0.828955	0	1.25224	0.403998	0	0	0.182267	0.206904	0.0904091	1.02025	0.653487	0.822377
ECHDC3	1.60206	0.00759652	0.0555887	1.6379	0.843482	0.344703	0.467499	0	0.783782	0.266951	0.187679	0.211719	0.029403	0.141206	0	0	0.215831	0.135218	0.283752	0.0194828	0.0891921	0
C19orf57	12.1932	3.72931	3.90527	6.05502	1.29994	0.293271	0.9903	0	0.927554	1.09806	0.887996	15.3115	0	0.778872	0	0	14.7727	1.24811	0.712034	10.5332	13.961	0
ZNF326	0.258912	3.83535	1.37659	1.56193	1.94571	1.49856	2.11056	1.12834	0.582317	1.49538	1.21366	1.91776	1.5752	1.70191	0.640665	1.59758	0.750527	0.819756	2.7001	3.74396	1.01526	3.87468
PALM	3.98913	3.62406	1.99843	5.00965	1.42936	1.05407	1.87813	1.6692	0.525563	1.66869	0.770711	2.64603	1.02864	1.01631	1.26458	0	0.650278	0.612966	4.27402	4.77511	1.4813	4.40813
MPP1	0.0478008	0.294024	0.159383	0.199193	1.15787	0.432239	0.446538	0	0.89679	0.508426	0.462588	0.474643	0.477096	0.549148	0.166532	3.31003	0.00455579	0.0473802	0.505202	0.262063	0.276782	1.22782
POLR3A	0.7983	0.462412	0.950848	0.588257	0.721779	0.69133	0.400833	0.378024	0.558488	0.536587	0.65638	1.03577	0.592947	0.412786	0.406696	0.433665	1.27456	0.362894	0.553609	0.0866574	0.533599	0.372275
PHKG1	17.4914	5.49266	5.2662	20.0127	0	0.622772	0.685049	0	40.6878	0.424617	0.37272	4.67645	0.550115	6.19469	8.31684	6.67215	0.718075	3.66681	5.17184	2.16177	0.208534	3.42525
CD1E	0.322079	0.199863	2.27081	0.0504563	0	0	0	0	0	0.0291525	0.0868969	0	0	0.0644719	0	2.04432	0.032236	0.13427	0	0.0611082	0.632105	0
LOC100505978	0.505643	0	0	1.73861	0	0	0	0	0	0.0637614	0.0192767	1.19219	0.243925	0	0	0	0.171266	0	0.387017	0	0.527144	0
DCC	0.947972	0.438256	1.20929	0.423568	0.0651065	0.0412637	0.0495984	1.43781	0	0.0193338	0.0444746	0.521467	0.0224764	0.0711184	0	1.32918	1.31784	0.0217249	0.0356617	0.308863	0.490382	0.503978
AHCTF1P1	1.68602	0.336348	0.439672	1.08817	0.0964114	0.0490243	0	1.20787	0.197279	0.0380188	0.0717628	0.290507	0.0530262	0.0828592	0	0	0.868794	0.0166446	0.106416	0.0650322	0.0907722	1.23734
ZBTB8A	1.73631	1.07828	3.99826	10.5839	1.80134	0.680385	0.915834	0	1.60162	1.41526	1.51191	1.49803	0.305878	0.931513	0.834095	1.27183	0.328497	0.310247	1.56409	1.3564	1.3456	10.2652
ENPP2	0.724324	1.03728	0.33785	0.28904	1.13798	0.41039	0.470436	0.799661	0.261534	0.494025	0.691271	0.523302	0.435844	0.486752	0.134077	0.319482	0.0942177	1.14381	0.283679	0.321767	0.0634023	0.169228
ADCY10P1	0.743654	1.37547	0.589242	0.452642	0.459065	0.741867	0.124285	0	0.459263	0.266513	0.481313	0.563154	0.444167	0.51879	0	0	0.673931	0.0605862	0.106539	0.511308	0.624733	0.240358
KCNF1	6.5625	13.3542	33.7542	20.9542	0	0	3.025	145.354	0	0.2625	0.341667	0	0	0	0	0	3.17083	1.99583	0	0.908333	1.4125	46.1958
LINC00683	129.527	3.40028	3.93118	12.1222	0	0	0	0	4.79073	0.398174	1.30197	5.78301	4.10183	10.9529	0	70.8497	0	0	23.5871	7.13553	17.3933	0
PLIN2	0.600004	0.216893	1.83456	0.198124	1.61115	0.275251	0.860768	1.10095	1.863	0.430149	0.2888	0.709917	0.218711	0.296893	0.613728	0.222699	0.28358	0.131321	0.0475663	0.177421	0.269151	0.136775
SNORD82	0	0.377892	1.0437	1.6401	5.90488	1.3856	81.347	105.851	0	0.318766	0.44473	24.1979	5.52956	0.416452	16.0308	13.3265	0.167095	0	0	1.83805	0	9.33162
TBC1D1	0.439539	0.608654	0.0520939	0.538033	0.759799	1.27669	0.564866	0.193957	0.249335	0.956077	1.19225	0.359014	0.922878	0.889641	0.481932	0.272681	0.924387	0.617644	0.477874	0.487321	0.807962	0.238036
WLS	0.0258527	0.264099	0.0495068	0.210612	0.664058	1.65249	0.678008	0.61512	0.323576	0.477668	1.23005	0.966406	0.625848	0.441126	0.29488	0.562239	0.124904	0.44992	0.598213	0.574635	0.0515538	0.042873
CYP2A7	21.431	3.07422	8.83048	14.0579	0	0.943773	3.32724	0	0	0.470621	0.207478	5.9941	3.76497	1.7332	11.262	0	4.13691	28.8547	0	4.25077	0	12.4234
PTPRJ	0.538099	3.04016	1.55587	3.32405	0.878064	1.29896	1.64649	1.12704	0.132891	1.13769	1.23456	1.24319	1.34658	1.67288	0.533902	0.283905	1.84786	0.710621	2.3588	2.56115	7.72512	1.92443
CD300LF	24.5357	13.6174	0.59589	18.5342	0	0.547456	0	0	0.998043	1.00832	0.955479	8.55382	3.15705	2.7593	0	81.7133	1.46477	1.34295	0.469667	0	13.8478	27.5504
ATP6V1B1	2.3638	0.310035	0.973891	0.852825	0.994528	0.384414	0.385961	0.739202	0.104827	0.781732	0.0651484	0.0200085	0.404664	0.136773	0.138996	0.50345	0.0271613	0.0153688	0.559174	0.373202	0.494654	0.112705
ACBD7	1.46178	12.4765	0.552989	21.6716	0	1.15528	5.18695	0	0.968802	0.765182	0.231484	5.07764	5.52774	1.95261	41.8728	0	0	5.67992	4.47749	0	4.83329	10.5239
PRKG1	0.146476	0.0138742	0.0771391	0.693336	0.473554	0.363782	0.497842	0.29838	1.65632	1.20702	0.324907	0.410594	0.363205	1.18517	2.56204	0.167847	0.878619	0.0629596	0.728581	0.206756	0.133959	0.0791066
TPTE2P5	1.49705	0.108742	1.14865	0.224991	0.582889	0.255842	0.354261	0	0.104519	0.344877	0.489397	0.107334	0.0918499	0.080354	0.278717	2.31115	0.191794	0.0561891	0.137247	0.0255725	1.01457	0
ABHD12B	0.623336	0.424791	0.019881	0	0	0.0151096	0	0	0	0.059643	0.0441358	0	0	0.209413	0.82652	0	0.790204	0	0.0234596	0	0	0
BANK1	0.680227	0.138214	0.648126	0.027134	0.0840669	0.263345	0	0	0.0162319	0.12398	0.0756481	0.515122	0.187212	0.762961	0.342203	1.94414	0.843939	0.0290115	0.604155	0.830493	0.20193	0.37388
DZIP3	0.872067	1.99739	0.932829	0.273057	0.693035	0.797979	0.23369	0	1.13834	0.509223	0.737183	0.0545233	0.713922	0.742235	0.442256	0.553303	0.128103	0.635664	0.338227	0.17893	0.268954	0
ZKSCAN2	0.315725	1.83673	1.74319	1.09245	0.443094	0.265269	0.161417	0	0.762293	0.322566	0.289962	0.503118	0.398464	0.221761	0.191188	0	0.777099	0.0361317	0.443522	0.0897948	0.754009	0.459396
ROS1	0.671084	1.36425	0.608516	0.550666	0	0.111597	0.12835	0	0.0564137	0.0793211	0.0445155	0	0	0.0320703	0	0	0.99418	0.65604	0.455139	0.360842	1.0188	0
DAZAP1	0.192382	1.7201	0.8172	0.76589	0.817686	1.4473	3.16479	1.52038	1.12888	1.51086	1.19087	2.38846	1.67983	1.83503	0.551674	2.2124	1.08527	1.80744	2.35917	3.26722	1.98811	2.77038
SPEF2	0.40459	0.525175	0.279943	0.16944	1.70143	0.614058	0.921789	0.441207	0.15379	0.530191	0.723457	0.382871	0.499844	0.703694	0.390194	0.743972	0.143608	0.35739	0.389492	0.0203148	0.9878	0.309637
CHST15	1.48566	3.34079	0.12488	3.56674	1.43163	0.936699	1.34863	1.26984	0.49608	3.703	1.8296	1.87282	2.18168	2.25827	3.31354	2.90208	1.71103	2.118	3.12909	2.08472	0.978677	3.91356
DLX2	19.6706	10.8697	1.83412	4.53555	0	0.810427	0	139.13	0	0	1.87678	132.427	0	1.15166	0	92.5877	0.462085	1.30095	0	0	12.6398	0
NAT14	0	0.320115	0.724759	0.230107	1.46674	1.79311	9.12992	8.66501	0.404644	3.33577	1.62249	1.85416	1.84555	3.49857	3.27002	1.96217	0.595617	17.748	9.49074	2.92643	4.58805	9.62301
PLA2G2F	67.6239	5.33406	14.139	0	0	0	1.41643	14.6833	0.52287	0	0.376545	7.96206	0	0	0	0	9.43312	23.1565	6.19445	0.42532	11.4368	0
TMEM174	0	0.196937	0.368758	0.435091	4.2149	0.137689	0.38898	0	0	0.0322004	0.0222826	0.0533238	0	0.149667	0	0.408172	0.0148122	0.0616959	0	0.0521646	0	0
CCL5	0	34.2188	0	1.05813	0	13.8321	0	0	7.15415	5.34357	5.3612	0	0	22.2972	0	11.6512	67.3795	0	21.9386	119.54	10.452	0
C11orf80	0	2.77864	2.57043	0.179055	1.60164	3.95729	3.43758	1.80616	0.155647	2.55544	1.19774	3.82505	3.74969	1.94497	1.84209	0	0.156263	0.544148	4.29384	3.11273	1.77598	5.73634
CTXN3	0.163728	3.90859	0.0360106	0	0.434287	0	0	0	0.292166	0	0.00960282	0	0	0.164448	0	0	0.906986	0.363227	0.0424925	0.27104	0.17069	0
FAM20B	0.422303	3.92437	1.90879	7.65595	1.00516	1.12607	0.602976	4.09545	1.701	1.48289	1.00096	1.05586	1.13367	1.00956	1.75756	0.395921	1.24066	1.17224	1.72485	1.92178	2.24762	2.09979
DKFZP434L187	76.5309	19.9445	89.9715	172.816	0	0	0	0	3.23296	0.58954	0.656101	0	2.37718	1.8019	0	39.8891	2.67195	0	2.48177	1.03645	3.38035	5.37718
ABLIM1	0.126843	0.33453	0.200283	0.307237	1.34068	1.16018	0.556321	0	0.923451	0.519467	1.09242	0.93997	0.511078	0.583723	0.687865	0.22032	0.131802	0.202549	0.428296	0.237336	0.611811	0.545845
FHL1	1.99923	2.34574	0.591874	2.64052	0.953223	0.463068	8.48723	0	55.6072	2.56474	0.80511	2.54125	0.567669	1.12885	13.3273	0.456584	0.949332	3.61709	0.30098	0.162664	0.324897	6.88536
EPX	6.34796	16.9077	2.50694	32.4572	0	0.669055	0	0	0	0.133005	0.697268	27.2942	0	0	0	41.0905	6.58979	4.86476	2.1039	45.9472	0.89073	0
PLD1	0	0.41831	0.290241	0.11516	1.11587	0.278473	0.246231	0.974296	0.46094	0.799935	0.539294	0.0965469	0.154847	0.518219	0.805819	1.22671	0.324285	1.18948	0.0702487	0.067787	1.23836	0
KIF13B	0.627773	1.05813	0.221046	0.386022	1.50023	1.23333	0.808958	0.202639	0.172631	0.692984	0.736804	0.478606	1.03721	0.560838	0.277129	0.727825	0.223456	0.803888	0.990268	0.533003	0.303965	0.378804
MPP7	0.118184	0.626209	0.0242828	0.481648	0.495823	0.935724	0.574413	0	1.58681	0.438645	0.502941	0.141689	0.319564	0.402042	0.501625	0.843079	0.907135	0.0904922	0.363943	0.180925	0.313104	0.885723
SLCO2A1	0.0470475	0.0626072	0.228522	0.138317	0.413642	0.541558	1.16288	0	0.0852916	1.41835	0.922156	0.421913	1.2241	1.68781	0	0.44169	0.0230119	0.108508	0.668001	0.282613	0.029113	0
PLXNA3	0.766058	0.71415	6.37163	2.00508	0.776698	1.36609	3.93935	1.70987	0.336749	1.77583	0.855343	1.08105	0.56409	2.30588	0.829901	3.35944	1.17333	1.79036	1.70428	3.70997	1.23268	3.68623
SH2D3C	0.467448	2.94012	2.78877	5.59626	0.732267	0.585342	2.07846	0	1.04852	1.08315	1.07121	2.74515	2.76932	3.78144	0.733888	2.98138	4.88124	2.04236	3.89948	1.3487	3.73384	1.08713
GNRH1	0	0.0212176	0.326002	0.970767	0.437082	0.266842	0	0	0.765331	0.456552	0.326002	0.401387	1.50595	0.227403	0	0	0.714658	0	0.0441825	0.281819	0	0
WDR74	5.88269	1.51747	0.162148	0.389729	1.54588	1.13347	3.67675	2.29301	2.49218	1.317	1.3024	3.15537	1.09645	0.864964	3.47132	3.04536	1.71767	0.0477059	1.42883	3.1512	4.51043	6.13504
GALM	0.490338	0.24308	1.02851	0.0160038	1.3637	0.532837	1.03713	1.2683	0.509187	0.352083	0.344615	0	0.25775	0.208672	0.371466	0	0.292958	1.09866	0.439126	0.100379	0.0887321	0
PPM1G	1.21092	6.87205	0.633705	1.05239	0.895192	1.97429	0.898772	3.07842	1.27013	1.36325	1.14003	1.48268	1.60189	1.39257	0.87228	0.292991	1.60512	1.00714	3.58804	3.12803	1.71087	2.70545
GPHN	0.0963674	0.846802	0.227507	0.356445	1.04337	0.566627	0.30125	0	0.739999	0.57421	0.509842	0.346703	0.192735	0.386122	0.826298	0.115771	0.467243	0.428517	0.384328	0.24846	1.33626	0.095063
ZBTB20	0.151842	0.257917	0.288646	0.154845	1.18025	0.712802	0.530603	0.619747	0.73454	0.942482	1.61739	0.429025	0.831566	0.756366	0.696481	1.07287	0.397901	0.958447	0.291474	0.231574	0.672457	0.353278
ZNF826P	0	0	0.0814698	0.780384	0.289157	0.577312	0.145682	0	0.178792	0.297385	0.523333	0	1.01275	0	0.651156	0	0.112773	0.779782	0	0.0437448	0	0
SIPA1	1.15657	0.84083	1.40969	0.851433	0.537414	1.24684	2.74199	1.84089	0.423678	1.82367	1.5324	1.18068	2.75467	4.2665	1.74202	1.01592	0.757998	3.74694	3.45367	2.90693	1.6378	1.23288
DHX37	0.651829	6.4739	2.43669	4.17882	0.610367	1.10796	1.56784	1.60335	0.582075	0.752801	0.532126	0.860358	0.82031	1.78491	0.748167	1.13683	1.32751	1.98671	3.97731	6.25635	2.94233	3.80064
SNX8	1.03421	2.44279	3.87673	3.99069	1.03025	0.911133	1.72159	1.33448	0.596699	0.957573	0.676844	3.85917	1.27837	1.21162	2.14482	0.752379	1.32009	1.75661	3.79209	3.31396	2.45618	5.93329
SERPINA12	60.8358	25.1266	8.38506	18.5387	0	0	0	0	0	0.157309	0.514831	7.66525	2.38347	0	0	73.3204	1.50159	4.36176	0	3.40837	24.955	52.8512
C9orf3	0.321249	2.05411	0.779668	3.17711	1.2078	1.1037	2.2846	1.67375	0.918952	1.19137	1.37952	1.63593	1.09734	2.00959	1.35975	0.616843	1.92866	1.25982	2.72672	2.36289	0.211751	3.27208
PDZD4	0	1.63792	6.65484	4.58996	1.74761	0.626454	4.2295	0	1.07485	3.645	0.870697	1.54003	4.50482	3.96754	8.44004	3.03905	2.24324	2.98125	2.92967	3.07758	0.422608	6.96278
ZNF534	7.30111	1.4594	0.831021	27.2804	0	0.339777	0	101.252	2.20855	0.33773	0.106436	0.847396	0	0	0	5.81305	0.235388	1.38367	0	0	6.8242	0
BOLA3-AS1	2.99545	0.62001	0.9429	8.42244	1.1142	2.88631	0	0	4.59929	1.91006	0.638201	0	2.10409	0	13.7888	7.10056	0.0985346	2.29358	0.485093	1.08388	0	0
MEGF11	4.37504	3.39595	1.65718	8.01303	1.08468	6.1289	0.450806	0	0.233116	1.41858	4.3603	0.313678	0.321563	3.88653	0	0.679465	1.12959	1.63318	0.0606788	3.13747	4.26808	4.6637
SAPCD2	5.83657	0.614857	25.8594	0.336	0.908571	2.42514	0	0	0.414857	1.47314	1.04229	7.73943	5.40343	0.185143	0	11.4446	2.30971	9.77829	2.38743	0.462857	5.98286	0
TBX4	31.2376	38.6635	1.71365	4.23764	0	0	0	0	0	1.09594	2.79631	6.07749	0	1.07601	0	0	25.0937	10.0494	2.12546	4.74908	0	0
EMILIN3	202.29	0.990184	14.9098	0.82454	0	0.587117	0	0	1.98589	0.553988	0.877914	4.36012	0	0	7.68957	0	6.95337	7.15215	0	2.07791	4.15031	22.6288
KRT84	99.6211	0	13.0773	6.63642	0	0.954633	0	0	0	0.598083	2.42109	0	0	0	0	0	0	6.94121	3.00192	21.5022	19.1732	35.4997
ODF3B	12.1852	0.211413	23.7889	0.179501	0.577396	2.11612	5.21651	0	1.58859	1.55368	5.62238	0.912465	6.01629	2.16997	0	0	0.420831	6.65352	4.31701	12.8892	1.77307	0
DLG2	2.61411	0.722093	0.688674	0.71141	0.270819	0.0597458	0.176072	0	0.269084	0.24857	0.160002	0.048941	0.0362188	0.326912	0.80777	0.215213	0.200542	0.0145788	0.461226	0.301438	0.178416	0.414051
FLJ40288	18.4394	44.7674	2.09879	52.2682	0	0	0	0	0	0.444572	1.36473	16.5112	0	0	0	0	59.2522	0	0	5.8363	0.682366	38.135
ZBTB20-AS4	0	56.6916	0	1.29515	2.55066	0.731278	0	0	2.27753	2.14537	0.550661	0	1.44934	1.01322	0	0	21.2996	0	7.08811	23.2467	0.581498	27.1938
SUCLG2	0.384196	0.177076	0.0347767	0.0110414	0.980584	0.912908	0.339918	0	1.53269	0.48725	0.6638	1.59413	0.374244	0.749089	0.167161	0.119015	0.123747	0.195816	0.0784542	0.316483	0.529801	0.231832
MAFK	1.01746	2.40719	0.128979	3.41079	0.798731	1.24865	1.69374	2.81781	1.25958	1.54459	0.839499	2.00786	2.11631	1.28561	0.976397	0.518482	1.21082	1.7554	2.23143	2.95156	3.96271	1.72563
CARHSP1	0.630139	0.51761	5.18227	1.82256	2.23269	1.27089	4.0286	11.2085	0.422478	1.42759	1.38848	1.38502	2.72304	0.887155	1.62871	0.762287	1.87142	1.58096	0.958103	2.04218	1.06718	2.63235
RNU5F-1	55.9842	0	2.82826	0	0	3.49695	7.95859	0	5.66748	1.57856	1.06334	17.6273	0	4.15469	39.2119	21.7272	0.712546	0	0	0	0	0
PPP1R16B	1.7207	0.498303	0.474029	0.468892	2.43111	0.125666	0.427168	0	0.304773	0.41693	0.245387	0.754386	0.637655	0.565886	0	0.627981	0.678641	0.0652959	0.253585	0.131542	0.0119264	0.302381
SBK1	7.37919	3.67661	11.1571	3.48695	0.492144	1.80638	0.696647	0	9.12285	1.28009	1.1346	2.16306	0.997649	1.05035	0	14.7354	3.33849	2.82036	2.25844	0.850303	0.12582	0.41977
FAM21EP	7.56077	59.1812	0	2.78891	4.24094	0.687633	0	0	0	0.905117	1.19936	0	1.59915	0	0	0	0.367804	1.01706	0.566098	0	3.1919	0
TCEB3B	0	34.5449	1.61677	25.2754	0	0	0	0	3.91257	1.5521	0.431138	17.3317	0	1.74611	0	58.6455	10.7569	9.86228	17.3425	0	0	0
CRYM	0.226434	0.27244	1.04188	0.0917238	2.10605	0.14463	0.269852	0	0.0743279	0.103513	0.0478746	0.131547	0	0.642641	0	1.17659	0.109407	0.558681	0.377534	1.21153	1.03196	0.521877
COL4A6	0.0335601	1.78434	2.38498	0.556447	0.103633	0.383382	0.228376	0.370342	0.145509	0.100729	0.120216	0.0791269	0.547738	0.619877	0.683602	0.628685	0.880533	0.130402	0.156236	0.784282	0.353217	0
SYT8	15.7251	15.1796	0	0	0	1.10421	0	0	0	1.46341	1.49667	0	14.9867	13.51	0	0	1.53659	6.08647	0	0	34.8226	0
PRSS33	36.6636	42.1727	36.8227	0	0	0.518182	0	0	2.05455	0	0.309091	55.0182	0	0.736364	57.9182	0	4.53636	12.0455	14.4318	45.0182	20.8591	0
POLD4	0.1364	1.3934	0.1244	1.1112	1.7476	0.6642	4.6198	3.059	1.9668	1.9546	1.7316	3.1698	2.8568	3.337	3.4502	0.7594	4.7338	0.6908	2.209	4.2082	3.4604	3.2406
KATNB1	6.18492	7.32294	14.5087	1.55745	1.652	1.02774	1.318	0	1.23826	0.917019	0.837962	2.5574	2.41683	3.27142	1.18768	0	3.31243	1.94932	1.38635	3.27233	1.80715	1.68071
LOC101929723	0	11.2732	0	8.09072	0	7.27423	0	69.8289	6.30928	23.7711	4.82474	0	10.1876	3.51649	0	0	7.06082	0	1.64227	3.75773	3.14536	45.5567
TMEM27	0	0.00526193	0	0	1.99922	0.0838194	0.908518	1.16202	0	0.0349763	0.273187	0.694884	0.0484716	0.246877	0	0.336825	0.0143001	0.0747194	0	0.104	0.139596	0.916751
LINC00921	9.33454	0.0677051	2.77989	3.5358	3.18453	1.25055	8.87893	16.7638	1.39074	2.58713	2.709	2.54412	2.37685	1.61775	1.89256	7.0493	0.60616	4.92097	0.415789	4.20329	2.19205	1.85751
KIAA1191	0	0.196779	0.153361	0.446644	1.38816	0.628863	0.416143	0	0.845054	0.492787	0.636628	0.979899	0.60105	0.586864	0.133538	1.02119	1.06733	0.801039	0.227167	0.197003	0.411365	0
RAG2	0.465716	0.674771	0.386175	0.0869337	0	0	0	0	0	0	0.0118277	0.700496	0	0	0	0	0.225022	0	0.0523376	0	0.0653481	0
MAF	0.0386066	0.0559367	0.0226982	0.519878	1.50688	0.112731	1.38175	1.05853	0.935187	0.5213	0.215364	1.56287	0.485169	0.884251	0.552798	0.431389	0.741394	0.431316	0.946806	0.242768	0.826991	0.301377
SEMA7A	7.15619	10.2654	2.19993	4.68261	0.510353	0.957515	1.61728	0	0.613174	0.726705	1.03731	5.04088	0.689218	3.34059	8.39272	0	1.29329	6.1071	0.0947876	3.69618	1.2076	20.7558
KNOP1	0.380012	3.66098	0.305011	3.97388	1.63404	2.12772	1.90549	0.801785	1.1443	1.28823	0.939642	1.87907	0.922916	1.96494	0.813824	0.579659	0.891062	1.16965	5.07907	3.62955	1.17391	5.18891
TLE2	0.269267	1.12984	0.876975	1.38888	0.801209	1.14392	2.52948	1.94392	1.04749	2.80576	1.47166	3.87107	1.24294	2.44106	4.29572	0.338231	1.84954	2.52247	2.12297	1.86388	2.41486	2.04352
MAML2	0.0521839	0.435105	0.105254	0.399989	0.764842	0.882204	0.453719	0.188481	0.201211	0.776969	1.32106	0.2457	1.06501	0.830134	0.562877	0.284984	0.311425	1.37251	0.787134	0.172601	0.234799	0.0439801
PSTPIP1	11.267	6.05033	0.317015	6.75693	0.850394	0.826772	1.58884	0	0.282438	2.08833	1.35193	9.37453	2.29647	7.29134	0	0.97227	2.25573	0.413215	5.78192	0.138651	2.00685	1.68093
BSG	0.0506244	0.152465	0.105404	0.243725	1.18125	1.00012	0.724211	0.661735	0.538419	0.903027	0.613812	0.58378	0.737709	0.37943	0.924534	0.0926698	0.109559	0.500712	0.697311	0.317213	0.598408	0.229645
TP53I13	1.78098	3.78491	0.665573	5.43385	1.78261	1.8491	5.59286	2.57372	1.15447	1.41809	0.977088	2.81387	2.70693	1.67149	1.87723	0	0.46983	3.46851	2.31893	3.33902	0.91804	9.91432
DDIT4	0	0.611625	0.0213755	0.04591	0.812218	0.371913	1.10495	0	0.301522	1.32592	0.378916	0.124726	0.554185	0.388077	0	0	0.380074	0.274513	0.58151	0.721925	0.207911	0.518173
41341a	9.32146	1.12607	0.31191	0.67875	0.561724	1.1853	3.14537	0	0.638626	0.945759	0.656539	2.24809	1.25337	1.64457	3.66315	4.57666	0.786939	1.70165	5.12955	6.46197	6.48681	2.93639
MIR218-2	0	3.95031	0	27.8571	0	5.12422	13.528	0	0	9.07453	0.484472	29.9627	7.91925	29.441	0	0	0	0	5.96273	7.54658	0	43.4534
MTCH1	0.0660739	0.157661	0.16164	0.709191	0.786133	0.613759	1.01171	0.406442	0.436937	0.836658	0.779679	0.983552	0.704042	0.737246	0.922293	0.221428	0.552165	0.0886113	0.61523	0.654921	0.604296	0.246674
CACNA1C-IT3	0	6.92347	0	1.1345	4.74564	1.98537	0	0	1.51688	4.72032	3.09707	8.08835	1.47636	7.59707	65.9401	0	6.11564	0.463421	0.448227	0	0.334271	0
GRIA1	0	0.860027	0.357151	1.09674	0	0.0149699	0	0	0.0616856	0.0154916	0.0158528	0	0	0.0466355	0.0953579	1.32124	0.114903	0.15596	0.0469565	0.15006	1.12712	0.197057
LMO7	0.932988	0.888105	0.276109	0.50294	0.784773	1.12315	0.530339	0.417764	1.07952	1.13251	0.945726	0.610972	0.815714	0.432112	0.743838	0.606648	0.24584	0.807355	0.794031	0.508414	0.271894	0.401085
GPRIN3	0.423943	0.479466	0.243166	0.0174029	0.493436	0.341368	0.210906	0	0.317336	0.773894	0.638637	0.054162	1.47457	0.594242	0	1.07158	1.22891	0.308634	0.22091	0.267613	0.233755	0.365401
C11orf68	11.77	2.66197	0.467651	5.43151	1.86303	1.45295	1.52517	0	3.71494	1.40952	0.815106	3.42001	0.993884	2.33371	3.43466	0	0.384322	3.83766	2.18624	1.88828	2.96044	11.316
DPP4	0	0.518999	0.172765	1.1698	1.67678	0.107542	0.172494	3.1026	0.0626514	0.341171	0.281687	2.11553	0.149643	0.0469208	0.134833	0.276029	0.35904	0.710662	0.101044	0.509658	0.447467	0.0631387
DEDD	3.56125	0.505019	4.71733	3.74967	1.59341	2.13974	1.54171	0	2.62663	2.02247	1.62885	0.851204	2.49152	1.61953	8.32469	1.17474	1.58888	4.54597	0.4288	0.610553	0.265968	4.66856
NDUFB2-AS1	0	0.15484	0	0.153276	0.231478	0.314893	0.68557	0	0.562533	0.2711	0.137635	0.838325	0.620402	0	1.69177	0	0.0338875	0	0	0	0	0
NOL12	3.06514	6.28429	0.678647	2.47733	1.29201	1.49137	2.94637	1.55426	0.927559	1.61982	1.1724	3.01039	1.50316	2.38734	2.55314	0.900604	0.401937	1.87407	4.84908	4.78296	0.468061	1.55651
ATF3	0.0415201	1.12652	0.820296	0.811408	0.279013	0.296303	0.216915	0	0.412461	0.221359	0.656833	0	0.336483	0.419219	1.8835	0	0.619636	0.112993	0.193294	0.420193	1.4115	0.0688552
ZNF154	0	4.18812	0.515374	1.8648	1.10931	1.57521	1.09129	3.70183	0.990286	2.05943	0.779559	3.4601	1.1288	1.52323	0.479195	3.40177	2.33956	1.62129	1.14667	3.43189	2.30752	2.39272
SLC27A2	0.319947	0.0953035	0.302658	0.232036	4.51748	0.0746725	0.941842	0.638767	0	0.0815634	0.121531	2.53026	0.0821899	0.267994	0	0.399632	0.0682827	0	0.00739208	0.0169141	0.0141577	0.257804
SLC2A9	0.175482	0.0238528	0.282908	0.416537	2.64607	0.173975	4.09625	0.963068	0.0621592	0.231567	0.151984	0.908136	0.123476	0.198182	0.317313	0.967236	0.107072	0.0081135	0.0141875	0.0179561	0.00979827	0.0501441
MATN3	1.43959	0.127253	0.0267714	0.602891	0.0792433	0.12993	0.234696	0	0	0.470998	0.110833	0.073889	0.247724	0.0410494	0	0	0.0753168	0	0.772622	0.201499	0.595038	0.876316
MNX1	33.7301	9.08761	25.4111	1.1708	0	1.94336	0	0	0	1.19867	0.20708	3.64381	0	4.14558	0	0	2.23805	20.7637	2.07876	12.0465	18.2748	0
ZRSR2	2.42484	7.25546	2.40044	2.81217	0.990938	1.17764	0.691529	0.567373	0.818974	1.15726	0.717719	1.99179	1.00123	2.03464	0.897501	0.584164	0.734936	2.22938	4.4373	4.55086	0.250447	4.01681
MIR27A	0	2.51715	3.06332	3.49077	0	0	15.6135	144.321	3.18206	0.391821	1.63852	4.91557	0	1.92348	49.6069	0	0	0	2.10158	2.58839	4.02507	13.4288
MPHOSPH8	0.115966	2.02003	1.08531	2.01837	1.73438	1.77139	1.99476	0.499778	0.70593	1.97914	1.28218	1.3656	1.19273	2.52614	1.47208	0.952097	1.28856	0.903755	3.21464	2.35309	2.01185	1.85442
LOC344967	0	1.25284	0	0	11.3011	0	0	0	0	3.17045	0.221591	0	3.62216	0	0	133.219	6.4858	4.08239	17.804	0	1.125	0
ACE2	1.37793	0.446446	0.268551	0	3.38978	0.0600523	0.633725	0	0.0647679	0.059138	0.0877687	0.671258	0.0204505	0.151622	0	0.168031	0.137764	0.166202	0.263739	0.253923	0.0480226	0.903238
CD109	0.534141	0.987543	0.564818	0.788417	0.479269	0.0589151	0.32358	0	0.292066	0.499349	0.380473	0	0.378312	0.131077	0	0.361439	0.337106	0	0.145649	0.0282374	0.768267	0
SLIT2	0.800349	1.13253	0.00585793	0.266965	0.900598	0.196983	0.493784	0.701662	0.416655	0.745089	0.359286	0.332144	0.184642	0.197685	2.11795	0.310353	1.25266	1.23384	0.16906	0.560916	1.06071	0
GOLGA4	0.293216	0.542371	0.336486	0.414306	1.80079	1.24797	0.447224	0.0949348	1.06449	0.899685	0.980882	0.761476	0.995656	0.639065	0.497326	1.16864	0.468883	0.456624	0.851037	0.475736	0.336655	0.290183
BAIAP2L2	0.845791	1.21123	0.394507	0.337511	1.0453	0.070714	2.19012	0.661685	0.0732725	0.156453	0.0733814	0.913239	0.0179099	0.469848	0.194722	0.282203	0.324555	0.101036	0.0441486	0.124716	1.68042	0.0615685
PHF3	0.50555	0.280137	0.405715	0.276273	1.26098	1.00621	0.43029	0	0.765073	0.940786	1.07379	0.480888	0.74128	0.872655	0.729998	0.267743	0.87535	0.820665	0.491456	0.329103	0.325905	0.422562
CTDSPL	0.0355896	0.484165	0.214373	1.02996	0.706939	0.606954	0.552996	0.634299	0.417839	1.27319	0.943751	0.0839122	0.95591	0.523877	0.75307	0.230028	0.531131	0.226271	0.520537	0.195117	0.117675	0.0590203
PARD3	0.260173	0.482311	0.534452	0.0959457	1.69495	0.848339	0.538157	0.186389	0.911512	1.05172	0.91408	0.850346	0.537638	0.86396	1.21821	0.855834	0.353677	0.969113	0.565133	0.548586	0.832689	0.44238
ARHGEF1	1.4475	2.04122	0.715901	1.37811	0.727513	1.1583	2.89568	0.984776	0.247078	1.34514	0.883122	2.30039	1.43424	3.72772	0.520386	1.12482	1.46425	0.907553	2.55634	2.17901	1.70858	2.18397
TMEM87A	0.0561257	1.2758	0.759822	0.393369	0.849018	0.595158	0.569806	0	0.557057	0.836024	0.684011	0.156019	0.781755	0.313454	0.581383	0.21532	0.0624271	0.371192	0.642344	0.483785	0.422482	0.419844
THOP1	3.74747	1.82873	6.97481	6.30639	1.31243	1.48829	0.960697	0	1.64257	1.29582	0.964517	0.967838	1.32189	2.28143	0.970994	0.821699	1.69023	2.30152	2.18378	2.85469	3.42513	1.22508
FRA10AC1	0	1.55834	1.00381	1.17308	0.973135	2.1643	1.75356	2.95291	2.62098	2.47264	1.70621	0.77964	1.31718	2.44935	6.52658	1.87296	1.70369	4.79142	2.56639	3.31001	2.98107	4.77191
MIR126	0	0.694192	7.56261	0	7.78312	4.402	56.2868	0	11.4501	4.4755	4.06715	0	16.8566	16.5871	0	0	0	0	1.44555	0	0	0
ZFHX4	0.135741	0.891559	0.254664	0.274877	0.202354	0.0579053	0.232313	0	1.56712	0.280693	0.142626	0.40955	0.0618663	0.191037	0.676505	0.109775	0.319957	1.46228	0.512849	0.451517	0.64837	0.231904
CD1B	0	0.0682615	0.47783	0.839332	0	0.0190264	0	0	0	0.0105146	0.0440612	0	0.282058	0.0782754	0	0	1.09969	0	0	0.0675939	0.166565	0
TP73	95.6251	14.0293	4.04286	12.5615	0	0.27504	0.274284	0	0	0.239904	0.530812	9.91655	0.449584	0.344178	0	2.24528	2.48934	4.84078	1.19952	1.4126	1.97779	0
P2RX1	12.2884	10.9787	4.30758	0	0.465571	2.7756	3.73611	0	0.47396	1.46068	1.43446	1.68612	1.34953	6.72877	0	16.1283	0.242223	0	2.75358	0	2.8857	5.14855
LOC101927495	37.9076	62.6113	17.1209	1.07641	0	0	0	45.006	3.09169	0.376744	0	0	0	0	0	0	43.1701	2.86445	0	2.42193	2.02724	44.115
TXNRD3NB	0	0	0.742166	90.6778	1.81583	4.43815	0	75.6762	2.558	1.90984	1.64761	4.52721	0	2.82518	0	0	0.321605	0	7.96097	5.58604	4.93788	5.59593
VWA2	3.70994	17.742	0.10855	5.46465	0.137158	0.887915	0	2.01218	0.273246	0.700226	0.567079	1.5582	1.12453	1.19512	4.52486	0	2.72123	5.29674	1.92716	2.06458	2.31243	5.70394
TMEM59L	9.40531	2.53399	0.166564	0	0.642936	0.670697	3.95645	0	0.916101	1.30808	2.63726	1.01604	0.790623	0	0	0	9.98828	1.34028	4.80703	10.9977	8.8079	2.58951
DTNA	0	0.858882	0.418217	0.0258536	0.210118	0.265403	0.367664	0.936443	3.58488	0.402866	0.246244	0.184322	0.0189862	0.45215	1.16976	0.40806	0.249187	0.175897	0.844628	0.697586	0.376782	0.0652688
B3GLCT	3.16729	0.0204025	0.125687	1.15139	0.459826	0.462521	0.126553	0	0.546152	0.427105	0.436633	0.392748	0.278994	0.087673	1.50824	0	0.232415	1.0975	0.0780491	0.0688103	0.0960457	0.108845
LOC101929550	0.794336	0.320065	1.8074	1.36015	0	0.0538791	0	0	0	0.0209436	0.0380025	0.271591	0	0	0	1.97309	0.0712758	0.154543	0.352832	0.0368202	0.120088	0
LOC102723766	336.087	0	0	0	1.43609	0.841304	0	0	1.42043	1.96435	2.03478	9.27	0	9.18391	0	0	1.23261	2.64522	3.17348	0	13.0461	0
ITGB1BP2	0.484486	0.640412	0	0.528221	0.319459	0.213244	1.08469	0	2.02596	0.305605	0.130663	0.124279	0.4053	0.407473	1.52028	0	0.388865	0.0431922	0.158915	0	0.0300172	0
ATP6AP1	0	0.0408734	0.164124	0.0103187	0.907355	1.15294	0.754983	0	0.479073	0.682867	0.477009	0.233947	0.47999	0.804226	0.323892	0.548552	0.515647	0.948343	0.571826	0.0124971	0.631674	0.492716
LOC339803	0	0.416256	1.02692	14.9986	1.2295	0.824922	0.767709	5.83459	0.301829	0.469966	1.66736	2.89336	0.192073	1.01174	3.64063	0	1.92365	0.534185	1.21958	5.78204	15.8568	2.11923
BCCIP	0.122661	5.37604	0.346443	1.49893	1.46485	1.55958	1.11028	1.43642	1.71713	1.10711	1.13809	2.31014	1.44822	1.2502	1.03126	5.0805	1.46926	2.48531	4.02124	4.5518	1.51098	3.47256
ADCK4	0.760048	1.0246	5.29129	0.337603	1.32225	1.45039	2.31816	2.85625	0.710234	1.48436	1.58575	1.65686	2.72459	1.69207	3.2618	0.499892	0.851049	0.0559739	1.17158	1.88041	0.586846	3.08349
BAIAP2	1.15348	0.14491	1.44965	0.0918915	1.11136	0.356163	0.905161	1.08487	0.0666556	0.285314	0.164699	0.510517	0.374972	0.363216	0	0.268543	0.67408	0.242092	0.475171	0.73764	0.771693	0.634933
PP14571	3.44251	46.8323	28.1711	11.8368	2.24117	0.575435	0	0	0	0	2.74593	0	0	0	0	0	21.7958	4.61862	0.893438	3.60909	0	88.4251
LOC101928992	9.15107	0	10.2201	0	0	0	0	0	0	0	1.1969	13.7644	0	0	0	0	1.34216	1.06327	1.02841	1.26662	2.88767	71.4364
ENC1	0	1.73052	0.132887	0.246546	1.30452	2.00634	0.761216	2.36526	1.60362	1.91725	7.00093	1.24512	5.89809	2.99722	0.50762	0.423444	6.28885	2.9609	0.924868	1.80038	4.04857	1.31883
NAA30	1.68418	4.13753	0.913359	0.86156	0.75355	1.09875	1.91444	0	3.23703	1.55739	1.2442	2.58153	2.15869	1.50836	5.37189	0.685744	1.91154	0.11532	4.74942	4.92612	1.48303	4.61444
HPN	0.363731	0.395136	0.459281	0.107733	1.89634	0.761051	1.37597	1.3384	0.103486	0.314876	0.360357	1.00513	0.0500928	0.309876	0.120863	0.37936	0.00560631	0.310968	0.409892	0.348586	0.0667904	0.238863
DERA	3.23155	0.0825476	0.0824585	0.395284	0.996359	0.902235	0.0646489	0.783267	0.727167	0.580683	0.695376	0.143189	0.644708	0.355124	0.591012	0.747113	0.0677656	0.761895	0.0284954	0.204009	0.840169	0
LOC100507564	1.89532	0.112646	1.20829	0	0.737513	0.286397	0	0	0	0.098831	0.237513	0	1.76567	0	0	0	0.0897981	0	0	0	0	0
CERS1	34.7532	149.224	15.4449	0	6.45366	6.8839	0	0	31.2761	0.755122	0.851707	0	0	0	0	0	0.570732	45.7815	18.3424	3.5561	19.8	0
PARD6B	0.0756563	4.08026	1.65183	5.62328	1.4794	1.51959	1.42557	0.955561	0.100267	0.889474	1.25502	2.32723	1.20602	0.940776	0.314531	1.4143	0.68782	2.20978	1.91003	3.61774	4.43233	4.19989
SCARA3	1.93502	2.4104	3.97316	1.09547	0.857885	1.3792	1.25617	0	1.2751	4.99568	2.61999	2.56872	3.07092	1.38354	2.03459	3.21741	0.39848	4.72024	3.11153	1.20175	0.196775	5.74256
MIR1-1HG	0	0	25.7758	143.139	0	4.22796	0	0	837.725	0.374055	0.11335	56.1763	6.60831	0	0	0	32.4521	5.42947	0	2.47103	1.49622	0
LCE6A	2.93412	0.429078	0.604505	1.80009	0	0	0	0	0	0.0860934	0.143489	0	0	0	0	0	0.145803	0.312899	0	0.100905	0.0610985	0
SGPL1	0.125903	3.09218	0.587086	1.9173	0.873129	1.57613	1.42005	0.81676	0.493021	1.40183	1.37815	1.31356	1.40286	1.53434	0.683269	0.917214	1.31476	1.49361	3.44621	2.72372	4.34891	3.37162
ITPRIPL2	1.3299	0.350645	0.17565	1.94085	1.3297	1.14318	1.16256	0.502992	0.917555	2.45134	2.34902	0.844326	3.05333	1.9863	3.29159	0.481602	3.90017	1.70496	2.77773	3.05167	2.58698	3.80339
RNF223	0	3.96	54.7733	0	0	3.66667	0	0	0	1.14667	0.533333	0	0	13.88	0	0	0	2.44	2.36	2.90667	69.8	0
LFNG	4.46237	2.15778	2.509	0.880209	1.12767	0.780481	0	0	0.688186	1.8078	3.38704	3.1913	2.24233	2.72022	7.74039	2.39595	1.02051	4.13438	6.30455	0.349668	1.22306	0.350287
ADIPOQ	0	15.2812	0.438024	40.9704	0	0	0	0	2.99173	0.133781	0.088468	81.1618	0	0.408895	2.56341	0	0.821026	0	0	6.57576	2.96907	3.91633
SPEG	2.1179	1.63664	3.25466	1.83721	0.30346	0.601897	0.61073	0	9.21893	0.504511	0.22006	1.47976	0.543093	5.03857	8.22212	2.02008	6.7063	2.01423	2.69468	1.11645	0.374518	3.73505
NOTCH2NL	0.230488	0.277317	0	3.42059	1.5442	1.03376	4.00083	0	0.954878	1.87478	2.30693	3.84117	1.25737	4.87888	3.93307	0.834439	2.9239	3.40537	3.21878	2.64088	1.38073	4.0882
MAPK1IP1L	0.0231047	0.142118	0.766555	0.0151773	0.966062	0.737793	0.477814	0.375062	0.734811	0.774347	1.19453	0.0802567	0.875337	0.741587	0.278713	0.521076	0.728104	0.671155	0.299718	0.464534	0.177351	0.333426
PRND	73.3283	0	11.4952	3.64966	4.55586	0	0	0	0	0.782069	0	5.13931	4.08414	0	0	0	0.806897	2.27172	3.97241	0	49.0221	0
PUS1	1.02103	3.34593	1.72362	6.83392	1.03681	1.67143	6.00553	1.95782	0.73094	1.77645	1.18033	2.09843	1.61957	2.94873	1.09544	0.510434	0.388986	1.4651	1.51858	8.21059	1.05163	9.3302
PAG1	0.0763432	0.480633	0.156109	0.804671	0.226317	0.199157	0.222571	0	0.148585	0.863898	0.556265	0.0519289	0.845071	0.543477	0.265683	2.79683	0.428252	0.153849	0.836126	0.832638	0.256157	0.158564
ETS2	0.163308	0.765975	0.459845	0.171409	0.738411	0.440161	0.508061	0.2763	0.486551	1.13116	0.941503	0.28487	1.42161	0.723095	0.935835	0.322967	1.07946	0.643335	0.43629	0.562192	0.70048	0.306517
UBE2Q2P2	4.15109	20.4254	1.05819	1.85877	0.232485	5.67203	0	2.78168	2.90329	3.66209	3.72086	0	0.184805	3.12986	0	0	1.05819	0	13.4726	16.448	0.183696	12.9737
LOC100507053	0.242534	0.572387	0.0310432	2.42427	0.0442709	0.103528	0	1.24073	0.173184	0.226936	0.276101	1.13919	0.0324959	0.440492	0	0.151546	0.412966	0.0922885	0.0399127	0.34568	0.0763081	0
ARL16	0	1.80141	9.03079	3.67064	3.76404	1.55367	1.08813	8.80239	0.927957	1.121	1.25017	2.90182	0.838511	2.35827	0.981833	0	1.24019	1.18049	1.02739	1.75295	0.469075	3.90466
SDHB	0.845286	0.54432	0.0766202	0.0172483	0.899847	0.608796	0.240597	0.516042	3.36953	0.398179	0.442414	0.239423	0.595831	0.28008	0.419886	0	0.118568	0.0281019	0.0943966	0.0127896	0.0797883	0.0663533
PHLDA3	0	0.745021	0.302318	0.765589	1.16846	1.81587	1.33888	11.6059	3.6474	2.24584	1.48123	7.64969	2.0395	2.34737	2.53967	0.927196	0.417238	1.41561	4.10251	1.72282	4.60562	13.0382
NTRK1	8.42383	12.4157	7.58077	7.36307	0.354809	0.653099	0.982265	3.93848	0.236539	0.659379	0.872892	4.45081	0	0.608094	2.95674	7.76183	1.72433	4.21375	0.167461	0.590825	0.0690778	0.591871
POLR3GL	0.836137	5.8993	0.902364	2.35108	0.621077	1.41728	1.3952	1.33802	3.45641	1.13724	0.649081	2.74196	0.67022	0.685119	0.544944	0.671546	3.49736	1.29044	4.59794	5.78213	0.509296	1.66416
EMILIN1	0.122288	1.54409	3.90504	2.12468	0.75207	0.997309	1.57163	0.717156	0.394221	6.45042	3.18639	2.52147	1.13171	2.29218	8.14663	1.74421	1.67199	2.11439	3.0249	4.13831	2.35384	2.56005
RAB5A	0.19207	2.35619	2.54136	3.68289	1.06735	1.46263	1.07004	0.899496	1.43988	1.31419	1.33206	0.983425	2.39097	1.20548	1.42387	1.22774	1.98269	1.84238	4.40632	3.27047	2.13552	2.26974
SNORD114-3	0	0	0.648727	0.778472	3.67179	0.929841	70.0019	57.4339	3.568	0.951466	0.596828	17.6497	2.52138	1.63912	25.2874	13.7054	0	0	2.25757	0.942816	0	10.0855
ANKRD53	4.89103	0.614483	0.533793	0.608276	2.1931	0	1.50207	0	1.23931	0.738621	0.587586	14.011	1.20621	0.970345	16.4028	0	2.06483	40.0386	2.42069	0.451034	8.17034	10.1586
ZNF283	1.01051	3.15578	0.294998	1.07614	1.43899	1.71456	1.4785	7.57184	2.34342	1.59669	1.72826	2.99873	2.90379	0.552087	0	0	2.86556	0.215355	0.665499	5.07741	0.107996	9.66359
AZGP1	0.170283	0.0219565	0	0.677912	3.52951	0.00891142	0.220155	2.06299	0.0442887	0.030331	0.0201312	0.699386	0.132705	0.116815	0	0	0.153695	0	0	0	0.00708619	0
ARHGEF11	0.052328	0.897954	1.35173	1.0483	0.594141	0.642195	0.683252	0.209369	0.421347	0.716744	0.716385	0.574171	0.756591	0.857748	0.416657	0.107833	0.352188	0.262094	0.500416	0.463993	0.497069	0.403457
IPO9	0.0992241	1.07437	0.573357	0.61058	0.421388	0.506703	0.308692	0.341212	0.41786	0.545069	0.670212	0.0832495	0.46659	0.575171	0.476803	0.680677	0.796262	0.500589	0.360781	0.495012	0.662939	0.615015
COL6A6	0.762359	1.40708	0.88898	1.26016	0	0.00726346	0	0	0.112398	0.149931	0.0360808	0.0800332	0.0168918	0.0268241	0.567665	0.231519	1.08364	0.0511145	0.409659	0.152735	0.822325	0.332498
IQCE	0.851638	2.62773	1.68842	2.25146	0.874798	1.17686	2.23935	0.888177	0.231677	1.04779	0.652877	2.20291	0.32455	1.33466	0.860048	5.24261	1.94497	0.829074	2.64049	2.32453	2.67183	3.21263
GOT1	0.0301176	0.0131157	0.213473	0.171741	0.952944	1.4165	1.08896	0.332354	2.52948	0.423546	0.644217	0.0710104	0.409856	0.67694	0	0.154209	0.00746316	0.117026	0.191172	0.165117	0.987964	0.160303
MRC1	0.561821	0.459368	0.0201728	1.7464	0.397455	0.194365	0.133004	0	0.0779667	1.22035	0.362785	0.851277	2.2646	0.782813	0.126193	0.133458	1.53738	0.589258	0.375239	0.197674	0.331942	0.239251
SOGA1	2.10894	1.11853	1.54857	2.3016	0.860905	1.54095	1.32123	0.99565	0.325513	1.54544	1.69464	1.13268	1.92721	2.43702	1.91235	0.398619	1.47245	0.807561	2.00388	2.71396	0.896374	2.15564
TTC38	0.191803	0.110585	0.351186	0.0422567	2.01577	0.487842	1.99944	0.484304	0.333353	0.342948	0.255818	1.65601	0.487261	0.770846	0.215693	0.226984	0.18308	0.575166	0.483384	0.408368	0.603321	0.659243
PRR7	0	1.40657	0	23.5094	1.26213	2.69622	2.49675	0	4.82155	1.16928	0.522736	29.2491	0	1.61292	0	0	0.223538	21.2465	0	1.39282	7.75506	0
ABCB10	6.00661	1.95659	1.57165	0.778416	0.846967	0.804154	1.20579	3.98286	1.51553	1.04559	0.933597	0.114879	1.41031	1.54126	5.0803	3.03043	0.978294	1.31979	1.57767	1.72156	3.87563	0.292785
GABBR1	1.37268	8.8389	6.79398	11.8346	0	3.57567	0	0	0.920626	6.288	6.16005	0	0.221085	11.2215	0.32309	0	6.88419	0	8.01557	11.3455	6.34395	15.4208
VILL	0	4.30393	7.6096	0.554656	1.17438	0.91498	1.67293	4.12522	0.615963	1.14083	1.00087	2.20735	0.401388	2.63158	3.44187	10.0402	1.39821	2.32851	3.50665	1.99595	0.795836	12.3329
SORBS2	1.06567	0.462713	0.786544	0.845884	1.01417	0.448992	0.597765	0.40021	0.315611	1.02687	0.717893	0.456254	0.80149	0.350159	2.59187	0.624606	0.462446	0.254021	0.719363	0.0510314	0.262107	0.219228
PLIN3	38.8958	0.75198	1.41927	0.453262	0.886268	2.49517	1.09918	0	2.42962	1.68179	1.97764	0.929489	2.73169	2.73392	1.28786	0.703018	1.62326	2.9899	1.59088	1.45962	0.283568	1.37079
KIAA1217	0.273362	0.70482	0.179693	0.181892	0.931584	1.16661	0.46876	0.0915599	0.88574	1.12037	1.08557	0.392717	0.672888	0.731817	0.383542	0.208784	0.448	1.09942	0.635255	0.425379	0.310498	0.228497
FAM63A	0.181072	4.26982	2.93746	1.29159	1.20036	1.28013	2.36427	3.90329	0.795421	1.11483	0.80504	4.49002	0.677956	0.982055	3.06415	2.21743	1.3586	1.04704	0.283289	0.89731	2.63493	1.14637
USP24	0.446775	0.920416	0.808747	0.893025	0.729294	0.790741	0.758018	0.193051	1.00734	0.686315	0.792954	0.548641	0.729294	0.786395	0.367447	0.572406	0.767474	0.325392	0.913431	0.602072	1.1821	0.514807
PMFBP1	3.32163	0.650407	0.160292	2.15905	0.0880124	0.148199	0.040647	0	0.0253064	0.0894681	0.31465	0.62846	0.138401	0.149543	0	0.603938	0.569841	0.103913	0.913381	0.169362	0.221095	0
C19orf84	65.1749	1.33771	5.66026	185.997	0	0	0	0	0	1.69262	3.03033	0	2.99393	0	0	0	14.8787	8.32659	0	0	3.08493	0
SMARCE1	0.0497778	0.0688727	0.600935	0.372099	0.786544	0.976838	0.228005	0.189589	0.796948	0.79201	0.708829	0.619023	1.15542	0.555415	1.26404	0.241054	0.59625	0.647186	0.526773	0.877409	0.03426	0.309725
SLC35E2	1.02649	2.81107	0.505607	1.54496	1.24446	1.49569	2.08163	2.12462	1.06456	1.15691	1.02167	1.07774	1.93719	1.83385	2.5819	0.430404	1.38702	2.24427	1.26831	2.28036	3.33634	1.83228
IRX6	0	5.8526	2.96821	6.31792	0.613439	1.57587	0	0	3.58815	0.33815	0.415462	1.16185	1.62789	1.14162	6.05997	0	0.0830925	4.10043	3.56864	5.57948	2.40896	7.11127
PRTG	2.02181	0.795716	0.461085	0.281015	0.441213	0.261505	0.13563	0	0.402699	0.418163	0.472935	0.0299152	0.371917	0.333909	0.321625	0	0.390271	0.657268	0.116265	0.121395	0.423582	0.533054
AXIN1	0.394184	2.7988	3.13155	4.63612	0.728472	1.384	2.11016	1.67661	1.04354	1.27394	1.06006	1.14998	1.20216	1.97076	1.75588	1.2595	2.47579	1.03034	1.57118	1.99006	1.46266	1.64666
SOX21	64.9364	21.2636	0.60511	6.03093	0	0	0	0	0	0.580905	0.104886	12.8848	10.4039	0	0	33.0148	6.5957	2.72703	0.71403	9.24204	2.00493	14.6437
RUNDC3A-AS1	29.4029	2.54282	2.54008	4.10088	0	0.31271	3.60713	0	0	1.02042	0.342883	0	4.63578	0	6.51753	35.0454	0.315453	23.4697	2.22463	8.29778	10.8324	0
VRTN	1.62725	32.2874	48.0803	24.1249	0	0.272004	0	0	0	0.0787381	0.329268	5.65244	0	0.715801	0	26.2055	4.82211	47.2691	0	8.92126	12.4907	44.7876
ANKRD13B	20.196	0.339599	6.18095	0	1.92776	1.12863	7.03626	0	2.48387	2.24463	0.638168	0.261327	1.82992	3.7217	3.93632	0	1.52441	6.63543	2.73257	1.90945	0.313719	0.713915
BEST4	4.89167	5.17266	3.94229	0	4.79801	1.17077	0	0	0	3.2228	2.03075	0	1.80937	4.43188	0	71.6168	0	1.35383	0	0	5.78997	36.5918
TSPAN33	0.092738	0.698492	0.340118	0.625512	1.21827	0.553378	0.735944	0.717828	0.321392	0.297128	0.402678	1.42491	0.254654	0.54615	0.111511	1.02387	0.154642	0.401552	1.38046	0.535027	0.372266	0
LRBA	0.095072	0.421338	0.213476	0.334046	1.05227	1.31134	0.716825	0.283009	0.289581	0.770936	1.3777	0.46285	0.761809	0.856135	0.204211	0.0827084	0.316758	1.10239	0.416316	0.265705	0.469933	0.219277
FAM171B	0.826225	0.567822	0.622449	0.490565	0.0983276	0.245819	0	0	0.274108	0.160758	0.444815	0.0892557	0.401407	0.0668199	1.38312	0	0.368533	0.218408	0.0509197	0	0.0693561	0
KCNH6	0	0.0573992	0.105138	0.0144907	1.38233	0.0133636	0.194819	0	0	0.0162618	0.000805038	0.190713	0	0.0377563	0	0	0.479964	0.349064	0.0257612	0.301004	0.887071	0
DACT3	2.93271	2.04703	2.0987	0.0781476	1.30246	1.72446	2.01491	0	0.634732	3.35687	1.51129	5.65615	3.14327	2.43256	29.9123	0	3.38292	6.47757	3.84096	6.91954	7.17525	2.68003
RPS19	1.25399	0.721802	2.77426	1.79085	0.813044	1.64584	0.797271	3.9217	1.10341	1.73864	1.97406	2.38968	1.97876	2.83026	1.83318	1.61487	5.27081	1.38329	2.17803	0.681028	3.22407	1.5826
PPP1R9B	0.249605	2.23742	0.740798	1.50476	1.0349	1.49129	1.59379	1.39284	0.750582	1.93604	1.19563	1.16053	1.80372	2.9151	1.17618	0.369898	1.78121	2.06948	2.73802	2.13337	1.53883	1.40831
WASL	0.0314569	0.237091	0.58632	0.0525104	1.13385	0.673217	0.319361	1.241	0.977246	0.913511	1.02513	0.135684	1.22501	0.444997	0.19126	1.22203	0.588401	1.13193	0.182226	0.494058	0.693668	0.235311
C9orf172	1.56138	0.199758	1.25834	9.28945	0	1.69591	4.10388	0	1.3888	2.2979	1.07217	15.2537	0.577533	1.07897	22.5754	0	6.57029	24.6899	5.07142	0.29624	9.75419	0
TUBA3D	20.0024	144.224	0	1.3012	2.65301	2.30602	0	0	0	0.455422	1.76386	0	2.37831	0	0	81.0361	0.831325	3.46265	3.77349	12.1446	7.21446	16.8578
SPAG17	1.07539	0.804953	0.257561	0.141132	0.254763	1.17115	0.336918	0.351988	0.0850163	0.357488	0.581538	0.185294	0.350494	0.331958	0.285221	0.649577	0.402794	0.151465	1.48321	1.33658	0.473694	0.234542
VCL	0.175372	0.394359	0.039393	0.191525	0.601167	0.960897	0.347799	0.553015	0.933446	1.38789	1.00313	0.662909	0.81091	0.554358	1.65989	0.478902	0.577667	0.934473	0.31423	0.469104	0.56928	0.292242
MIAT	0.223068	5.37888	7.8767	5.11407	0.601838	1.32424	1.55041	0	0.421092	1.73349	0.867229	0.459921	2.32271	4.414	6.34162	0.798891	1.7463	0.591743	2.94202	1.49916	1.26755	3.40097
USP20	3.26643	1.66553	8.29802	0.350045	1.26112	1.1234	2.07912	0.99649	0.643744	1.03852	0.818002	2.109	1.9288	2.1586	3.54662	0.715302	0.147165	2.42205	2.64752	1.08803	0.413051	0.441944
SNORD76	0.10872	1.19337	3.80281	1.08975	3.30544	3.09836	22.078	10.8653	0.361071	0.507094	2.04527	5.30033	2.49896	1.80727	2.62378	1.49163	0.0502152	0.295871	0.333015	4.2074	0.0352304	5.59557
C8G	131.318	0	8.74158	1.46107	2.54942	0.566538	6.53506	0	2.5693	0.616234	0.40751	42.2667	0	0.80508	0	0	16.3749	142.39	0.879625	0	0	0
GTPBP4	0.618787	3.96037	1.25639	0.552151	1.98616	1.64523	1.86573	1.23539	2.06685	1.76873	1.61881	1.58198	2.44381	1.21213	0.523639	1.03193	1.33377	1.29234	3.57218	2.75179	0.0806096	1.19614
PPEF2	0	0	0	0.587973	0	0	0	0	0.0751	0.0417912	0.00351708	0.0856512	0	0.118132	0	0	1.1174	0.383982	0.543285	0.147924	0.045722	0
PRR30	0.244337	0.0304526	0.145456	0.228574	0	0.0408423	0	0	0	0	0.00931492	0	0	0	0	0	0.457864	0.171609	0.940806	1.33956	0.121452	0
ARPP21	0.115333	1.63605	1.69111	0.0623142	0.0629811	0.0468919	0.10087	0	1.82929	0.0112124	0.056187	0.39235	0.0359296	0.233543	0.135257	0.505099	0.0532692	0.180732	0.00737766	0.351252	1.99193	0.257301
ANP32C	3.34925	0.264484	0.129241	0.208656	0.051222	0.0614106	0.101327	0	0.0630854	0.159249	0.0940698	0.127706	0	0.0226103	0	0	0.527294	0.312496	0.84928	0.157574	0	0.861563
GOLGA6L6	1.39838	0.839572	0.0192874	0.415392	0.0210926	0.0151544	0	0	0	0.0190499	0.0689786	0	0.0659382	0.0142518	0	0.134917	0.514489	0.226318	1.04489	0.0192399	0.707791	0.172447
SPATA16	0.959438	0.294522	0.0625404	0.211377	0	0	0	0	0	0.00799935	0.0467841	0.77424	0	0	0	0	1.30923	0.738849	0.126535	0.906351	0	1.78822
C1orf186	0.0507751	0.0304502	0.0111675	0.0134011	1.10082	0.384461	1.90645	0	0.0270255	0.807562	0.995773	0.068122	0.584063	0.187243	0	0	0.00483927	0.919982	0.0603792	0.0840544	0.0370018	0
GGT6	1.80703	0.0570953	0.510975	0.0510895	1.90817	0.576158	0.105302	0.602664	0	0.252565	0.312783	0.0331521	0.420247	0.0833608	0	0.158714	0.302533	0.0146542	0.621802	0.422569	0.0799174	1.2975
SNORD78	0	0.785421	2.38398	2.71663	0	2.54107	93.2433	180.841	0	0.304928	0.896304	37.7094	7.23511	0	33.0524	23.1653	0	0	2.95688	2.01437	0	0
GABPB1-AS1	0	0.142127	1.11111	5.09772	2.49543	2.9445	2.74227	0	1.74477	3.76752	1.84137	4.19834	2.42904	3.81934	1.5821	0.303879	1.01022	2.12485	1.02049	1.05821	2.39577	5.75239
RUNX3	38.6324	1.87492	6.6141	0.594486	0.696284	0.757125	0	0	0.383732	1.46017	0.434233	3.03526	0.708214	2.8591	2.90801	2.16361	2.37079	5.09508	4.6008	1.79777	1.09433	1.44347
NEURL1	14.5335	0.465772	0	5.05517	0	0.244844	0.826775	0	27.0182	1.85284	0.427053	2.69784	1.25041	1.03745	0	4.6862	8.87359	3.93344	0.594458	0.24826	4.49715	25.5173
CCDC65	1.05536	0.0303775	0.191357	0.131842	0.690416	0.313901	0.150028	0	0	0.302948	0.388501	0	0.226901	0.188258	0	3.12268	0.116137	0.0378169	0.036577	0	0	0.233721
TTC28-AS1	3.96225	3.74467	3.05834	1.46889	2.27683	1.70789	1.95376	0	1.75521	1.64444	1.68595	1.07893	6.47306	1.60663	1.97359	7.3278	0.148581	1.50035	3.05887	1.19526	1.72613	0.299013
PRC1-AS1	0	0.238533	2.29939	0.144565	0	0.353382	0	0	1.126	0.149384	0.248974	0	0.264233	0.240942	0	0	0	0	0	0	0	0
AOX2P	1.72034	0.756283	0.72539	0.317006	0	0.0135313	0	0	0.0218456	0.00513536	0.0468703	0	0.175336	0.0382299	0	0.780004	0.68178	0.0551032	0.0953709	0.136943	0.769081	0
COLCA2	0	3.56936	2.04147	22.0459	0.200342	1.10679	1.31822	0	0.401439	0.532732	0.169849	3.75458	0.837403	2.70675	1.31369	0	0.608585	0.170353	5.68315	4.54763	4.16484	10.7471
MCHR1	0	10.5543	3.81908	9.44408	0	0	0	0	3.96711	1.27303	0.384868	6.12829	0	5.6102	0	0	42.3799	39.227	0	0	1.95395	0
SH2D4B	0.71344	0.754323	0.450172	2.04068	0	0.110448	0.0676097	0	0	0.0846518	0.0800886	0.792039	0.183272	0.0436762	0.544509	1.40723	1.06741	0.172842	0.14984	0.213352	0.805449	0
FOXI1	0.140468	0.452091	0.0496346	0.0359423	0.472507	0.56224	0.160762	0	0	1.34307	0.0635714	0.111861	0.262966	0.0198049	0	1.72327	0.247073	1.39417	0.0638159	0.0495123	0.27568	0.138268
ITGB8	0.042904	0.241639	0.224614	0.124867	1.53667	0.815378	1.00104	0.783592	0.00700854	1.17388	1.4604	0.705381	0.459416	0.642444	0.0647824	0.151645	0.157816	0.702854	0.252959	0.141907	0.377422	0.0761326
UBL3	1.7175	1.36443	1.30359	1.71289	0.82414	1.09818	1.05963	1.01865	1.53196	0.978509	1.33384	2.37261	1.125	0.900151	1.37935	0.741675	1.86542	1.34088	1.84329	3.72941	3.75137	2.64145
PRDM4	0.408738	0.110123	0.168417	0.42196	0.718741	1.01412	0.610163	0.42447	0.586565	1.00867	0.975373	0.326797	0.768977	0.685444	0.156594	0.483247	0.553123	0.507279	0.208905	0.372641	0.680763	0.355993
POLR2A	0.0956294	0.807754	0.412685	0.40268	0.825958	1.02709	0.691331	0.227106	0.470977	1.06332	0.99077	0.562418	0.895192	0.607954	0.54767	0.156263	0.537997	1.20431	0.442223	0.47916	0.642541	0.449673
UQCRC2	0.106507	0.0467675	0.342539	0.170865	0.865026	1.00364	0.265286	0	3.20248	0.652359	0.723954	0.190765	0.473911	0.46067	0.137685	0.54258	0.462825	0.0861832	0.340537	0.143921	0.086799	0.0897629
NBPF1	2.22323	2.03369	1.15397	0.554518	1.14511	0.81377	1.82921	1.79476	0.431183	0.927301	0.646545	3.16619	1.6763	1.31316	2.58278	3.66613	2.59971	2.35396	1.62914	1.60849	2.15108	2.56246
ADI1	0.299447	0.0840048	0.00664946	0.416478	0.921527	0.902952	0.469762	0	1.6801	0.81314	0.453493	0.219698	0.178693	0.375384	0	0	0.451188	0.52615	0.0518658	0.165749	0.383408	0.436293
ARHGAP6	0.101729	0.526075	0.0111025	1.17596	0.855104	0.896157	0.878169	0	0.406272	0.376408	0.855879	0.641145	0.692827	0.768995	0.278981	0.17708	0.23242	0.287115	0.286426	0.0174283	0.225276	0.529088
C1QTNF8	79.1084	0.292699	47.4989	0	0	0	14.7146	0	0	0.438053	0.163274	20.5168	0	0.597345	0	50.9635	11.8712	31.8584	10.9135	10.5073	35.9841	9.77655
ACADSB	0	0.00543222	0.105799	0.00665169	2.62657	0.456934	0.111601	0	1.46138	0.283695	0.304648	0.515506	0.36418	0.133921	0.962241	0.728065	0.0207681	0.370832	0.159973	0.0620825	0.319614	0
NELFB	0.835868	1.05149	0.335654	2.03591	1.1448	1.42964	2.79775	1.24972	0.931792	1.54836	0.897639	2.14466	1.8702	1.64559	1.84267	0	0.395056	1.21908	2.04154	2.78369	6.24376	3.73224
SNORD21	0.157461	0.124214	1.6732	0.266437	3.7329	1.58893	20.6759	10.358	0.448372	0.18586	0.535184	9.34863	3.42675	0.875734	3.30253	1.9371	0.0974321	0.611837	1.14032	3.96886	0.0304764	7.84559
L3MBTL4-AS1	0	15.5469	7.59708	2.41203	0	0	0	108.952	0	1.80492	1.69006	0	5.32452	0	0	0	2.58432	9.90246	0	3.3227	0	50.6445
DNAAF3	45.9187	2.01389	0.820638	0.939398	1.35789	0.986525	0	5.52705	0.1684	0.728898	0.299728	0.260141	1.55331	0.430427	0	1.78454	0.803044	0.950709	1.01103	5.75075	10.3849	3.87887
SLC13A1	0	0	1.00681	0.0795382	4.24335	0.0951266	0.307778	0	0	0.0259098	0.0858693	1.66626	0	1.28416	0.236806	0.388008	0.15232	0	0	0.198925	0.0180358	0.261226
MYLK2	17.1037	0.364744	8.73246	4.48484	0	0.699168	0.647444	30.6091	140.823	0.128419	0.276457	0.815993	0	0.144471	0	1.76754	8.0217	0.42717	1.4349	3.33442	5.82253	2.07967
FITM1	0	0.884393	0	0	3.8185	5.60809	0	0	342.77	1.93526	3.46474	0	0	1.68555	110.279	0	4.39075	12.5584	5.43121	4.21387	0	0
LOC101928174	0	0.401373	0.431434	0.147996	0	0.0710248	0	0	0.119916	0.0343562	0.102408	0.136764	0	0	0	0	0.0763104	0.105051	0.267912	0	1.30454	0
TKFC	1.02568	1.0185	1.24032	1.72487	1.48231	0.260227	0.396261	0	0.182658	0.291378	0.172137	0.314937	0.348936	0.27735	0.62579	0.346171	0.371134	0.571822	0.43488	0.565757	0.0930413	0.046665
SRGAP2	0.500661	0.562288	0.522671	0.561133	0.192312	0.238388	0.718086	0.271546	0.351214	1.17592	0.466817	0.147247	0.863493	0.674681	0.96351	0.535155	0.880487	1.65829	0.219554	0.304056	0.652058	0.677279
DNHD1	0.647435	1.37772	0.821933	0.898398	0.650307	0.336063	0.319097	0	0.245272	0.311407	0.328962	0.646132	0.136373	0.839899	0.222347	0.722936	0.498537	0.571594	0.583815	0.741454	0.569079	0.780418
TNFAIP2	0.120014	1.71855	1.54904	3.1442	0.652447	0.839399	2.55241	1.74886	0.376083	1.10696	1.23775	1.591	1.12573	3.90982	1.36412	1.44252	2.1122	1.09232	2.16359	1.99222	2.90824	3.5115
PKN1	2.60913	2.06024	0.64739	1.4512	0.929031	0.930685	1.61463	2.69575	1.29071	1.45415	1.12616	2.22479	1.70504	1.89614	2.55555	1.45513	4.01457	1.492	2.44432	2.25398	0.921747	1.40861
JPH2	4.35894	0.243529	5.3129	0.100417	0.719317	0.881898	1.78668	0	29.5169	2.16751	0.586793	7.32398	1.61488	3.28338	16.0634	0.676964	1.65142	6.20573	0.39962	0.0744592	0.340873	2.93567
LOC63930	29.7194	4.71336	1.00086	2.475	0	0	2.81638	0	0	0	0.0659483	0	3.0375	1.16379	0	30.8289	0.655603	7.2	6.24181	2.77371	51.2418	0
GTPBP3	2.72538	0.204727	0.865333	0.729863	2.38442	1.44717	4.03251	0	1.2394	1.6675	0.63473	5.66957	0.67773	4.73498	1.58987	0	0.769058	3.25585	5.18096	0.154116	7.49385	3.74521
CRYZ	0	0.199767	0.0547765	0.212878	1.67225	0.971247	0.439208	0.234365	0.381069	0.622191	0.650903	0.349554	0.511704	0.278522	0	0.254855	0.0175011	1.14015	0.293594	0.00678867	0.789011	0.229725
CDCA5	71.2008	0.485496	0.343511	0.412214	0	2.97481	0	0	0.831298	1.81603	1.31679	5.42519	3.67099	0.370992	0	11.8718	0.148855	2.76412	0.405344	0.927481	1.13817	0
PLA2G3	0	13.1238	8.07019	1.58991	3.19756	0	0	0	0	1.14274	0.291009	11.3352	0	0.816246	0	0	0.408123	37.306	31.3971	8.13052	0.784306	57.5028
SYTL5	0.440411	1.8683	0.384692	0.0419528	0	0.142246	0.282807	0	0	0.086434	0.114527	0.0856849	0.289456	0.0853103	0	0	0.0526283	1.06792	0.0759458	0.0204145	0	1.51732
ZFYVE9	0.0774571	0.0279488	0.693861	0.0250089	0.760028	0.865082	0.552862	0.559173	1.47365	0.722397	0.998044	0.584025	0.252794	0.344284	1.24178	0.562701	0.496611	0.543258	0.39101	0.270551	0.808478	0.044334
CCDC50	0.0473912	0.586429	0.108274	0.0830093	0.777862	0.783001	0.565229	0	0.471462	0.913925	0.955579	0.409115	0.822489	0.836921	0.839431	0.240124	0.888571	0.33879	1.01332	0.404245	0.753523	0.20325
SCMH1	0.076571	0.0734322	0.313918	0.516467	0.605438	0.645622	0.972832	1.11121	0.832826	0.723162	0.986627	0.364759	0.46923	0.692472	0.805546	0.0768035	0.774235	0.150584	0.300898	0.468416	1.38731	0.190265
PCP4	1.01531	0.0418419	0	0	0.14602	1.70584	0	0	0	0.243082	0.590057	0	0	0.0461115	0	0	0.0657516	0	1.06227	0	0.0629052	0
MAT2A	0.625838	0.0930991	0.507312	0.0376374	1.91488	0.571837	1.09211	0.408523	0.965683	0.981367	0.970491	1.29007	0.545856	0.400467	0.394551	0.124569	0.165882	0.0869563	0.463205	0.0576771	0.18071	0.372824
PIP5KL1	2.34927	11.7773	3.40383	1.77741	0	1.33752	1.56341	0	0.537384	1.0498	0.61823	0	1.11519	0.273448	7.89075	14.6818	7.83369	20.2803	0.380449	9.18071	0.403038	0
PGPEP1	0.159631	3.33953	1.86173	3.2807	5.14771	0.853917	3.2882	2.77528	1.1063	1.04148	0.809279	3.60927	0.729564	1.70814	1.75559	2.71972	1.08159	0.671791	1.18637	1.54659	5.07257	2.29875
UCKL1-AS1	105.3	0.517649	21.0515	0.807481	0	1.13528	0	0	1.12769	1.30361	0.785965	1.15806	0	1.31754	4.52721	0	9.13669	4.9183	0.224019	0.275911	11.9414	36.8619
MTRNR2L10	3.67765	1.1432	0	0	1.97903	1.15938	60.1096	257.867	0	0.668664	0.0539245	2.23247	0	0	15.5087	0	0	0	0	6.08808	0	0
LEKR1	0.188294	0.502276	0.167616	0.767375	0.328943	0.139886	0.0691809	0	0.0492652	0.141221	0.166663	0	0.276247	0.0219168	0	0	1.14577	0.0303024	0.579843	0.356291	2.13184	0
OSBPL7	1.74839	0.522772	0.466988	1.21632	1.28091	1.29739	2.64012	3.97421	1.72278	1.52183	1.16462	1.10459	1.24682	2.65121	0	5.47826	0.97247	0.777063	1.71919	3.07041	1.17081	3.47982
FZD5	0.739269	0.0669894	0.707617	0.448042	1.63391	0.339139	0.76579	0	0.479766	0.537216	0.52009	1.07667	0.566917	0.507082	0.436768	1.01864	0.206894	0.280821	0.480994	0.165559	0.0721202	0.0817315
UBE2Q2P1	0.106752	3.99063	0.265998	1.89897	2.25769	1.93483	3.65504	1.42104	0.706852	2.45215	1.64217	1.73071	2.38953	1.19936	1.61569	3.12044	0.553923	1.10274	5.96169	4.78072	2.35403	2.08181
F8	0	0.403411	0.726096	0.368383	0.75013	0.20149	0.311746	0	1.42471	0.743017	0.363802	0.751747	0.867608	0.422218	0	0.879355	0.853758	0.142805	0.788715	0	0.0732886	0.463173
ARHGAP28	1.05637	1.40675	0.0766493	0.235245	0.149739	0.0742488	0	0.622962	0.652512	0.826587	0.117954	0.0757388	0.114891	0.407251	0.617912	0	0.272742	0.321662	0.550948	0.94363	0.433325	0
ECEL1	9.37245	2.61099	9.35144	9.65609	0.910123	0.420204	0	0	0.57205	0.768782	0.145161	5.56579	1.53088	0.154711	0	6.54467	4.12373	11.801	2.50785	1.60441	3.77133	8.2083
CTBP1-AS	8.90639	6.94975	16.5048	3.74714	0	0.491796	4.69777	0	3.30149	1.33563	0.321711	0.545854	0.433783	2.08321	7.96894	5.0063	0.304571	20.3693	0.233372	0.942719	4.39584	6.47378
UPF3A	1.13165	3.99228	1.58921	4.07697	1.65705	1.48326	1.60478	0.385044	0.839385	1.58921	0.968931	1.01918	1.29996	1.89918	1.44047	0.408703	1.06345	1.38714	2.79812	3.08841	0.672232	3.47392
DNM1P41	8.20588	3.57353	0	5.39037	0	1.37166	0	0	0	3.00802	0.625668	102.333	0	0	139.584	0	0	5.76337	0	128.539	21.393	0
PLD4	0	0.146692	26.8447	6.7116	0	0.286481	0	0	0	0.464238	0.238159	8.55302	5.52598	0.654075	0	7.60729	2.82167	10.6619	3.60518	2.89933	0.3814	1.95187
LINC01004	0.423654	4.31821	0.71518	5.42631	1.94424	0.983916	0.980841	2.99833	1.02996	1.69816	2.12014	2.90383	1.9548	1.76493	1.67029	4.23173	1.91076	1.06933	1.01279	0.761896	1.37843	2.59031
SPATA18	0.783085	0.917205	1.9822	0.653257	0.779493	0.032676	0.406566	0	0.149013	0.335433	0.194829	0.668675	0.261408	0.177922	1.16652	0	0.250808	0.267014	0.230046	0.396054	0.0296975	0.971256
MESP1	0	15.3411	22.8161	1.80602	10.1137	1.66555	0	0	11.4883	6.37124	2.8495	0	0	0	0	0	24.2308	38.99	26.3478	0	10.0134	0
STMN1	0.958362	1.93443	0.96252	1.84781	1.33548	3.02444	0.878043	0	0.694117	1.78912	1.96282	0.379495	5.41701	1.1013	1.58214	1.93882	2.81223	0.734039	6.52223	3.50136	0.852854	3.07624
TNFRSF21	0.301862	0.840888	0.268944	0.0630107	2.21452	0.686796	0.860107	0	0.189664	0.392437	0.284539	0.321713	0.528616	0.323989	0.100143	0	0.023687	0.0201887	0.397368	0.19055	1.55137	0.152996
CLDN9	12.0223	4.64428	32.5039	1.9379	0	1.83463	0	0	1.81944	0.376645	0.941613	12.3959	0	0	0	0	0	2.05332	0	2.17179	45.2551	3.43537
CDHR5	0	0.102062	0.372536	0	0.516317	0.122955	0.273745	0	0.050597	0.0537343	0.00834384	0	0	0.776778	0	0	0.558303	0.0212267	0	0.30178	0.435815	0.740065
MYO1H	2.82667	0.506162	0.695912	0.656445	0	0.0422522	0.0697161	0	0	0.0289043	0.0458052	0.0397554	0.198201	0.0220864	0	0	0.0302487	0.0878653	0	0.020934	1.50053	0
IRF7	7.43159	1.11074	5.26459	0.463476	0	5.08152	0	0	1.85536	1.93091	2.5651	4.91953	0	5.93583	0	0	3.13681	0	5.64089	9.96109	6.85406	13.6362
GATA4	28.6418	1.07786	0.652777	0.12689	0	0	0.511788	50.2983	0	0.0232631	0.145218	0.645022	0.907261	0.114201	0	16.4294	3.80739	4.70338	1.47262	2.63578	17.8611	6.93804
ALDH2	0.353715	0.0927781	0.0828779	0.160835	1.58667	0.630428	0.484617	2.25322	1.01989	0.543382	0.21213	1.78704	0.309946	0.52995	0.560374	0.23691	0.124997	0.401189	0.438677	0.479117	0.623452	0.0327401
ATP8B5P	1.1996	0.0353585	1.0822	0.874108	0.114634	0.0730512	0.209212	0	0.204457	0.0142644	0.0788435	0.276125	0	0.230911	0	0.765093	0.24751	0.0274915	0.0276644	0.0618126	0.15371	0.0977763
SSBP4	0	0.334975	0.709584	2.59026	0.774612	1.12632	2.69756	1.46702	1.08948	1.61264	1.49036	2.04772	2.39576	2.87753	2.39738	5.62588	2.42395	1.25594	2.39474	2.22519	0.67362	1.62746
[truncated: 18,140 more rows]
