# Supplementary material for: The orchestrated cellular and molecular responses of the kidney to endotoxin define a precise sepsis timeline
Source: eLife. 2021 Jan 15;10:e62270. doi: 10.7554/eLife.62270 (PMC7810465; doi:10.7554/eLife.62270)
Supplement: Supplementary file 6. [file elife-62270-supp6.xlsx]

## Sheet: time1_hr
HGNC.symbol	X	Time Point	Subject 1	Subject 2	Subject 3	Subject 4	Subject 5	Subject 6	Subject 7	Subject 8	Subject 9	Subject 10	Subject 11	Subject 12	Subject 13	Subject 14	Subject 15	Subject 16	Subject 17	Subject 18	Subject 19	Subject 20	Subject 21	Subject 22
A1CF	A1cf	1 hr	0.987393	0.227167	0.10956	0.0720285	1.69197	0.0235117	0.252028	0	0	0.037291	0.0514558	0.409768	0	0.222638	0	0	0.182023	0.0894214	0.00852779	0.0195127	0.416705	0.112355
A4GALT	A4galt	1 hr	0.566554	0.871111	0.441488	1.3959	2.03626	1.77774	1.90312	1.12844	0.346008	1.62348	1.06389	0.603813	0.92957	1.10044	2.02708	0.156787	0.471627	0.448924	1.53322	3.23352	0.809646	2.96796
AAAS	Aaas	1 hr	1.06177	0.270815	0.802441	0.550347	1.50523	1.19351	1.39707	1.69908	0.79313	0.779163	0.416326	2.59998	0.478632	1.02175	0.385421	0	0.427718	0.301918	0.821955	1.42272	0.134714	0.230995
AACS	Aacs	1 hr	1.76754	2.1865	1.9737	0.571393	0.943629	1.66635	1.16527	0	0.54992	0.835617	0.908239	0.218328	0.779399	0.854233	0.659591	0.406242	0.770828	0.614893	1.30471	0.912755	0.253625	2.38612
AADAT	Aadat	1 hr	0	3.1967	0.0909704	1.16321	1.58046	1.08437	3.50842	0	1.70418	1.03524	1.0874	1.43673	2.61388	0.958221	0	1.20202	0.340836	0.110984	2.26334	0	4.35323	1.41429
AAGAB	Aagab	1 hr	1.49835	0.0982999	1.21663	0.3986	0.924559	1.31403	0.812887	1.20679	0.78672	1.0019	1.25083	0.103379	1.40937	0.748146	0.388571	1.09969	1.62005	1.02864	0.204122	0.391849	0.144975	0.874605
AAMP	Aamp	1 hr	0.455393	0.75654	1.51945	0.389243	1.83297	1.6042	0.980987	0	1.21469	1.11756	0.905845	1.09388	1.2848	0.911365	1.21701	0.783427	0.107505	1.81307	1.50066	1.31183	0.843568	0.274794
AARS2	Aars2	1 hr	1.85416	0.150761	5.97969	1.17514	0.69008	1.0745	1.33187	0.598748	0.539001	0.913477	0.507337	1.18532	0.778309	1.18039	1.4314	0.491505	0.0335732	0.491505	1.12629	1.31675	0.936151	1.17816
AATF	Aatf	1 hr	2.05935	3.64482	3.50271	2.77144	0	1.72053	0	0	0.879108	1.60792	1.03752	0	0	1.37056	0	0	1.85915	0	3.02756	2.10789	2.81421	2.67661
AATK	Aatk	1 hr	2.70931	1.954	3.49453	2.2664	0.123754	0.203844	0.859521	0	0.293583	0.353651	0.251608	4.49373	0.156562	0.524928	2.52428	6.09939	3.36137	3.34328	1.04431	1.665	1.91348	3.28176
ABCA1	Abca1	1 hr	2.50635	1.32355	0.552226	0.639449	1.73045	0.678523	0.797787	0.5243	1.26156	1.53003	1.29612	0.625734	0.717567	1.28068	1.00737	1.1184	0.670819	0.679048	0.98373	0.715962	0.275325	0.622553
ABCA13	Abca13	1 hr	1.25228	1.27806	0.872954	0.582523	0.121966	0.0956264	0	0	0	0.228433	0.969965	0.268843	0.189823	0.220222	0.109604	0.50664	1.77889	0.838127	0.579663	1.41765	0.874154	0
ABCA3	Abca3	1 hr	3.90557	0.964267	2.48751	0.476951	0.497266	0.610033	0.719128	1.11174	0.364658	0.737074	0.4625	0.664817	0.762008	0.473457	0.712495	0.148481	1.31832	0.790615	1.30269	0.221448	1.07034	0.656644
ABCA7	Abca7	1 hr	7.40127	2.04506	0.877277	0.219333	0.583893	0.86549	1.15092	0.967402	0.331284	0.615476	0.293102	1.2671	0.383904	2.57808	0.340872	0.348429	3.26479	1.8444	3.17918	1.70239	0.795612	0.625289
ABCB1	Abcb1b	1 hr	0.147132	0.216096	0.472237	0.214842	0.603201	0.575349	0.269213	0	0.0324678	0.165434	0.552752	0.0428991	0.398977	0.166421	0	0.15855	0.691	1.14664	0.0700578	0.0807025	0.0474344	0.534691
ABCB6	Abcb6	1 hr	0.748907	1.23696	0.571102	2.50569	1.17741	0.652385	1.13464	1.03918	1.54578	0.738156	0.569566	1.11208	0.352538	0.528098	3.33269	0.296184	0.238767	0.841767	0.375103	0.0844721	0.618478	3.19328
ABCB8	Abcb8	1 hr	2.07563	2.2171	1.95204	2.40886	0.849912	0.611266	1.82927	1.13463	0.504591	0.724988	0.510081	0.698282	0.954435	0.818681	0.553774	0.676398	0.891973	0.256227	0.93218	0.224403	1.46088	0.730107
ABCC1	Abcc1	1 hr	0.11994	2.27109	1.87693	0.408577	0.119331	1.35932	0.0952314	0	1.73426	1.64065	1.74572	0.162051	0.0295791	2.53446	0.239474	0.592697	1.05333	0.0941659	1.49235	0.769106	2.37688	1.66312
ABCC10	Abcc10	1 hr	0.867006	1.25685	2.41466	1.63728	1.61227	1.17958	1.93804	2.30496	0.360899	1.28542	0.996003	1.58124	1.50651	2.42076	1.0617	5.42552	1.02372	1.1091	1.61428	2.08873	0.0770432	1.54719
ABCC4	Abcc4	1 hr	1.08827	0.230378	0.445546	0.246581	1.05758	0.466477	0.6748	0.330472	0.338838	1.02035	1.46312	0.774795	0.782665	0.609889	0.172379	0.065539	0.379015	0.655092	0.365226	0.0757567	0.130582	0.162359
ABCC5	Abcc5	1 hr	1.06483	1.68975	1.2215	0.912631	0.680136	2.2513	1.03801	0.514072	0.962021	1.30108	1.41885	0.718522	1.10331	1.35644	0.566374	0.0749974	0.661322	0.327987	0.720203	0.994893	0.154515	0.38346
ABCD1	Abcd1	1 hr	1.52924	3.36931	1.83396	0.338448	0.919356	1.19577	2.6408	12.6038	2.34378	1.20574	1.13759	2.74018	0.72489	1.23335	3.33784	0	0.17228	0.0719909	1.11812	2.41849	0.0500314	1.67005
ABCD3	Abcd3	1 hr	0	0.0548109	0.0280596	0.0132629	1.72806	1.11634	0.685249	0	0.855366	0.836735	0.939049	1.58573	0.596965	0.43366	0.385977	0.113095	0.0737579	0.474216	0.425315	0.380158	1.52198	0.0510215
ABCF2	Abcf2	1 hr	0.809291	0.768514	0.678677	0.944711	0.381191	0.881878	0.453455	0.581954	1.10079	0.592964	0.557208	0.305017	0.445996	0.994023	0.5382	1.2045	0.32259	1.00891	1.01762	1.41825	0.592713	1.04452
ABCF3	Abcf3	1 hr	0.224241	0.583265	0.2194	0.676117	1.73823	1.37512	1.21758	1.32307	1.90935	1.2309	0.811089	1.84912	1.45967	0.911611	2.04633	0.416295	0.95348	1.10618	1.24895	0.716666	0.288489	1.40863
ABHD11	Abhd11	1 hr	0.287613	2.23242	0.0273917	0.210733	1.02701	0.971492	2.40499	2.42508	0.650462	0.80842	0.946292	0.293639	1.97366	0.994867	0	0.751446	0.077062	0.86996	0.381475	1.41012	0.608826	1.12726
ABHD13	Abhd13	1 hr	0	0.0307782	0.090302	1.83333	1.16333	1.05996	0.351336	0	1.71283	1.32332	1.87834	2.30096	1.12602	2.42233	1.27962	0	0.41565	1.03441	0.303281	0.103804	0.666231	0.33856
ABHD14A	Abhd14a	1 hr	0	0.650273	0	0	0.790569	0.875448	0	0	2.95674	0.411769	0.403352	0	0	0	0	0	0.0455963	0	0	4.27553	0.348636	0.793375
ABHD16A	Abhd16a	1 hr	0.160069	0.75223	0.412846	3.65013	0	2.53599	0	0	2.01377	2.19614	2.15929	0	0	2.3893	0	0	2.54186	0	3.43514	3.03356	2.21444	4.70396
ABHD17A	Abhd17a	1 hr	0.332996	1.9577	0.588136	2.24604	0.90664	0.860128	1.78581	1.26828	2.63785	1.34142	1.06539	1.89164	0.539602	1.32036	5.02966	13.6825	0.814796	0.446579	2.94237	0.889282	0.882204	4.15993
ABHD2	Abhd2	1 hr	0.278983	0.0918601	0.3347	0.386319	0.593936	0.755051	0.35035	0.46628	0.318827	1.17312	0.955911	0.873167	0.755051	0.48352	1.01376	0.14164	0.148099	0.935815	0.206126	0.559929	0.629383	0.497853
ABHD3	Abhd3	1 hr	0.134446	1.26462	0.0508608	0.0354843	0.964581	1.13688	0.808451	0	1.72887	0.834472	0.997109	0.316993	1.84301	1.61079	2.93081	0.92338	1.17532	0.766067	0.102904	0.0798397	0.0979761	0.22296
ABHD4	Abhd4	1 hr	0	0.92871	0	0.0337087	0.576832	1.12317	0.34626	6.38333	0.847075	1.03385	1.57949	1.38779	2.47576	0.269097	0.446125	2.46544	0.328259	0.0775071	0.566284	0.0464355	0.114426	0.129675
ABHD5	Abhd5	1 hr	0.155733	0.309298	0.473028	1.71157	0.91434	0.844673	0.555842	0	1.40743	0.614259	1.44063	0.432909	0.874085	0.340878	0.970046	5.56113	0.585253	0	0.15858	0.0548929	1.2788	0.316075
ABHD6	Abhd6	1 hr	0	0.0694532	0.624046	0.302728	1.785	0.467195	1.16844	0	0.465001	0.46939	0.205261	0.41233	0.229919	0.828404	1.49763	0.884689	0	0.501664	0.558853	0.145748	0.0917867	0.30105
ABI3	Abi3	1 hr	5.17216	0.678144	0.66408	1.51875	0.521339	0.427902	0.303427	0	0.23634	0.640155	0.488684	0.516327	1.42645	1.08665	0.384093	0	0.0509214	1.15179	0.0843841	0.115584	0.364533	0.793728
ABL1	Abl1	1 hr	0.404854	1.15761	0.160166	2.57899	1.2576	1.28938	1.57412	1.15585	0.603057	1.31479	1.41224	1.47545	1.90297	1.534	1.01729	3.07181	1.29369	0.583012	1.5611	1.92815	4.58878	2.31823
ABLIM1	Ablim1	1 hr	0.126843	0.33453	0.200283	0.307237	1.34068	1.16018	0.556321	0	0.923451	0.519467	1.09242	0.93997	0.511078	0.583723	0.687865	0.22032	0.131802	0.202549	0.428296	0.237336	0.611811	0.545845
ABRACL	Abracl	1 hr	0	0.336032	0	0.162397	2.84667	1.12881	0.680401	0	0.529966	1.38799	0.554616	0	2.70239	0.330232	0	6.37953	1.19442	0.0663364	0.293983	0.259183	0.122885	0
ABTB1	Abtb1	1 hr	1.70868	0.538761	0.494094	0.960285	1.64409	0.772725	2.67817	2.42938	0.569629	1.7185	1.04676	2.89373	1.15991	1.91127	1.62773	2.50093	2.19675	0.929723	1.23943	3.0121	0.469052	2.8554
ACAA1	Acaa1a	1 hr	0.0175629	0.19278	0.186625	0.10015	2.75266	0.361533	0.960164	0	0.286723	0.344356	0.301067	1.51242	0.379817	0.361275	0.668085	0.221699	0.16968	0.207355	0.350614	0.332845	0.0056912	0.221339
ACAA2	Acaa2	1 hr	0	0.524851	0.0421016	0.0916177	1.77707	0.612342	0.624367	0	1.13033	0.469984	0.679331	0.419984	0.439262	0.257703	0.499319	0	0.328109	0.215085	0.120309	0.367502	0.00425529	0.0364601
ACACB	Acacb	1 hr	0.2135	0.310599	0.746416	1.64061	0.914843	0.756104	0.917757	0.08322	0.865588	0.583543	0.421748	1.96812	0.388559	0.621567	0.675524	0.599059	0.787155	0.695449	0.60905	0.62275	0.274675	0.816078
ACAD11	Acad11	1 hr	0	0	0	0	2.26557	0.806767	2.29424	0	1.91063	0.821597	1.11326	0.204658	3.03427	0.781061	1.17456	0	0	0	0.578381	0	0	0
ACADL	Acadl	1 hr	0.642314	0.662472	0.124184	0.422092	1.93911	0.581363	0.807385	0	0.562345	0.706878	0.742536	0.979778	0.621585	1.03769	0	0	0.229635	0.722567	0.354865	0.107353	1.25601	0.586973
ACADM	Acadm	1 hr	0.0274216	0.128866	0.0103736	0.11427	2.53171	1.06711	0.341403	0.979659	3.15976	0.4067	0.428694	0.988023	0.495037	0.231636	0.495358	0.140405	0.0812597	0.191549	0.267622	0.0162841	0.347756	0.248202
ACADS	Acads	1 hr	4.50415	1.73715	0.291848	0	1.67609	1.19377	1.84948	0	2.86539	0.39173	0.340296	4.88028	0.531266	0.57623	0	1.58766	0.212042	3.76233	0.435698	1.77249	0.117967	0.386918
ACADSB	Acadsb	1 hr	0	0.00543222	0.105799	0.00665169	2.62657	0.456934	0.111601	0	1.46138	0.283695	0.304648	0.515506	0.36418	0.133921	0.962241	0.728065	0.0207681	0.370832	0.159973	0.0620825	0.319614	0
ACADVL	Acadvl	1 hr	0.0230532	1.15747	0.714402	0.980342	1.40254	0.974128	2.17512	0.796083	0.910579	0.72696	0.809754	0.886654	0.789608	1.08716	0.531902	0.22769	0.474618	0.155943	1.06877	1.01311	0.312679	0.886654
ACAT1	Acat1	1 hr	0	0.106363	0.141504	0.555597	1.5903	0.671341	0.268684	0	2.25591	0.272537	0.25806	0.261255	0.266883	0.453088	0.763303	0.150683	0.0612316	0.156641	0.182757	0.0102686	0.259505	0.0920375
ACAT2	Acat3	1 hr	2.59095	0.4261	0.243859	0.119129	0.812427	0.559232	0.5639	0	0.576224	0.456909	0.523195	0	0.367469	0.0707676	0	0	0.186349	0.0593776	0.0974689	0	0.186349	1.37745
ACBD6	Acbd6	1 hr	0	0.180069	0.0320369	0.797845	0.847557	1.16169	1.27721	2.95576	1.29244	1.09793	1.45981	0.534369	0.553544	1.88142	2.52965	0.557963	0.569641	0.176676	0.871546	0.722172	1.99931	1.58149
ACD	Acd	1 hr	0.869971	4.4989	3.60353	0.108194	0.439769	1.31452	1.31121	4.88714	0.833538	0.947988	0.807777	5.48295	1.3723	0.92554	4.32851	2.09838	0.367272	1.59568	2.44946	5.86531	0.124755	2.27171
ACE	Ace	1 hr	9.85916	0.780597	0.165153	0.938366	2.94876	0.0973728	0.367513	0.936059	0.747659	0.0950653	0.121139	0.80471	0.0288426	0.125523	0	1.07427	0.190073	0.712817	0.316173	0.0969113	0.15875	0.854261
ACE2	Ace2	1 hr	1.37793	0.446446	0.268551	0	3.38978	0.0600523	0.633725	0	0.0647679	0.059138	0.0877687	0.671258	0.0204505	0.151622	0	0.168031	0.137764	0.166202	0.263739	0.253923	0.0480226	0.903238
ACER2	Acer2	1 hr	0	0	1.13038	0	2.33981	1.47226	0.466548	5.65255	1.60914	1.67083	2.25498	0	3.87697	1.50825	0	1.27369	0.641342	1.70296	1.34245	2.90532	0	0
ACKR3	Ackr3	1 hr	0.363324	0.493844	0	0	0.479993	1.47141	0.386765	0	5.75139	0.62756	0.728779	0	0.792707	0.364922	8.76826	0	0.0612644	0	0.623298	0.380904	0.0703208	0
ACLY	Acly	1 hr	0.112715	0.407758	0.51377	0.346791	0.988503	0.874152	1.15209	0.226269	0.243886	0.681954	0.754427	0.400298	1.02028	0.546736	0.119501	0.180876	0.841554	1.22262	0.473118	0.474978	0.806605	0.0741898
ACMSD	Acmsd	1 hr	0	0.27859	1.01507	0.292979	3.19896	0.419015	1.66016	1.15225	0	0.283562	0.227738	2.21591	0.14826	0.777083	0	0	0.0174024	0.0360856	0.543016	0.0164231	0.0255386	0.926247
ACO1	Aco1	1 hr	0.307588	0.730015	0.0328758	0.970743	1.22912	0.506278	0.476121	0.979176	0.514132	0.341546	0.495957	0.788391	0.415605	0.131982	0.281761	0.252082	0.302679	0.131252	0.23733	0.0941216	0.199672	0.185701
ACO2	Aco2	1 hr	0.0275172	0.17921	0.231627	0.0326558	1.52538	0.874285	0.784993	0.122491	1.72222	0.417855	0.300907	0.768575	0.323341	0.514444	0.504487	0.64373	0.0398693	0.283792	0.322367	0.221948	0.251666	0.522479
ACOT1	Acot2	1 hr	0	0.0948387	0	0.964516	1.70581	1.18839	0	0	2.64387	0.25871	0.0980645	0.590323	3.25613	0	0	0	0	0	0.206452	0.140645	0.45871	0.729677
ACOT12	Acot12	1 hr	2.24319	0.62191	0.376644	0.119582	0.808198	0.507615	0.295295	0	0.438876	0	0.0703665	0.963574	0.381525	1.28165	1.16979	0	2.93628	5.63705	0.475889	0.08867	0.202151	0
ACOT13	Acot13	1 hr	0	1.03342	0	0.296484	2.17877	0.668185	0.545711	0	2.23553	0.43951	0.425114	2.23699	0.257885	0.448795	0.811524	0	0.00678096	0.792746	0.634802	0.0745905	0.611538	0
ACOT8	Acot8	1 hr	3.42505	0.467747	2.64135	2.79118	1.37165	0.830838	3.12095	0	2.08006	0.526	0.884647	0.788382	0.175745	1.10334	0.960425	0	0.0283857	2.1119	0.0436893	0.0999671	1.13271	0.279167
ACOT9	Acot9	1 hr	0.303722	0.0691211	0.717035	0	1.6318	1.25857	1.49869	0	1.74781	1.59158	1.79573	1.32384	1.66494	0.901529	2.54296	0	0.62119	2.12541	0.0670654	0.0280082	0.589585	0.466374
ACOX3	Acox3	1 hr	1.53407	1.50809	0.514693	0.0313032	0.923552	1.10488	0.678343	0	0.824744	0.904706	0.989033	2.39214	1.01885	1.14363	1.61489	0.551959	0.575064	0.910988	0.708688	0.561861	2.09678	0.248296
ACP5	Acp5	1 hr	0.973749	0.0826435	0.63104	0.597399	1.04472	0.101384	1.47529	0	0	0.195549	0.195856	0.140555	0.758385	0.360528	0	2.10034	0.0648245	0.0488488	0.0271894	0.351926	0.153305	0.557613
ACSF2	Acsf2	1 hr	0.41855	0.252594	0.296314	0.174113	2.09156	0.084811	0.946748	0.130499	0.195095	0.0838445	0.0588903	0.932744	0.158235	0.324097	0.0458651	1.16288	0.0776678	0.0218776	0.166876	0.212717	0.0934984	0.130688
ACSL1	Acsl1	1 hr	0.101646	0.635294	0.126298	0.593313	1.31976	0.962584	0.43731	0.157124	1.44119	0.330981	0.764544	1.41961	0.670604	0.404369	0.482669	0.297515	0.22485	0.0946916	0.38758	0.596634	0.560117	0
ACSL4	Acsl4	1 hr	0.0335317	0.1376	0.162872	0.0829391	1.0977	2.30236	0.325307	0.655837	0.378245	1.23492	3.26579	0.407108	2.7468	0.576663	0.145333	0.0578414	0.24409	1.22001	0.658143	0.614047	1.66879	0.14329
ACSL5	Acsl5	1 hr	0.107031	0.827213	5.11833	0.23462	0.320935	0.905053	0.728343	0	0.559008	0.867389	0.976146	0.252354	1.08584	0.97897	1.34275	4.66133	0.156623	2.25471	0.183616	1.3225	0.213434	0
ACSM1	Acsm1	1 hr	6.01903	2.45524	0.686817	0.18398	0.30569	0.0392572	0.23099	0	0.073715	0.0975893	0.108788	0.197886	0.330795	0.0977124	0	0	0.405494	0	0.0217822	0.649406	0.564738	0
ACSM2A	Acsm2	1 hr	0.150483	0.352222	0.525429	0.298856	3.69624	0.0651042	0.679977	0.0729259	0.00785749	0.123138	0.0354073	0.802302	0.0418487	0.260596	0.0405297	0.374148	0.27423	0.0388478	0.0642402	0.2378	0.152942	0.191806
ACSM3	Acsm3	1 hr	0.800426	0.402346	2.3883	0.0184395	1.42599	0.471024	0.22347	0.762356	0.032426	0.130268	0.280168	0.478738	0.630645	0.177496	0	0	0.373934	0.191169	0.131021	0.14369	0.0625941	0.146262
ACSS1	Acss1	1 hr	1.40776	1.13525	0.239374	0.271976	0.529641	1.039	0.839571	0	0.945015	0.621178	0.456099	0.35044	0.384225	0.757503	1.0599	0.544194	0.160372	0.706045	0.645495	0.60633	1.47498	0.435844
ACSS2	Acss2	1 hr	1.28244	1.87029	0.248647	1.84282	2.42062	0.628417	1.65846	0.293264	1.50836	0.618753	0.60379	2.67363	0.399137	0.885949	0.53591	0.326931	0.188404	1.04856	0.512413	0.328373	1.46624	1.13491
ACTA2	Acta2	1 hr	0.020844	0.126388	0.209855	0.397524	0.83425	0.830096	0.981119	2.11758	0.606798	4.69746	0.479067	1.30105	1.12891	0.973119	11.3254	0.437869	2.76692	0.693621	0.316742	0.523313	0.630799	0.111984
ACTG1	Actg1	1 hr	0.060394	0.20092	0.450557	0.290109	0.562751	0.857736	0.282436	0.729805	0.22027	0.874388	1.06065	0.371763	1.22625	0.501308	0.64219	0.130899	1.09742	1.19886	0.232857	0.376326	0.821322	0.214368
ACTL6A	Actl6a	1 hr	0.286031	0.175875	0.0373462	0.167045	0.397636	1.20883	0.593631	0	1.12125	0.805549	1.34461	0	1.4827	0.293993	2.70803	3.24811	0.0334379	1.2385	0.117394	0.0315561	1.80217	0
ACTN4	Actn4	1 hr	0.0201894	0.495563	0.58062	0.508647	0.698681	0.881512	0.609899	0.177945	0.159954	1.02763	0.691575	0.49064	0.620193	0.552928	0.866245	0.277311	0.533422	0.848275	0.482408	0.310788	0.524266	0.243767
ACTR1A	Actr1a	1 hr	0	0.299044	0.513798	0.472953	0.848106	1.06362	1.02658	1.72723	1.69748	0.957767	0.804851	0.058033	0.809101	0.645657	2.07175	0.880326	0.417901	3.38145	0.347627	0.869671	0.69887	0.230229
ACTR1B	Actr1b	1 hr	0	0.506281	0.218418	0.533655	1.68261	1.02457	1.55467	1.16749	1.74821	1.14876	1.19448	1.3399	1.56764	1.13637	1.279	0	0.863972	0.331757	1.01237	2.29358	0.0212271	0.471606
ACTR3	Actr3	1 hr	0.17793	0.135195	0.0303324	0.277869	0.662297	0.937309	0.316122	0.257129	0.567885	0.98894	1.121	0.40965	1.40607	0.611154	0.624207	0.95294	0.744979	0.74412	0.244796	0.399245	0.383847	0.789224
ACTR8	Actr8	1 hr	1.77559	2.20989	2.16736	1.6253	0.701157	0.938324	0.966581	0	0.996083	0.643206	0.779031	0.986984	0.836503	0.750487	0.52012	2.14935	1.714	0.144925	1.35605	1.09197	0.62539	0.470312
ACVR1B	Acvr1b	1 hr	1.76625	0.944277	0.508959	0.0998524	1.07772	1.61573	1.09662	0.570129	0.305917	1.04487	1.32204	0.268182	0.641592	0.71931	0.447685	0.859673	0.465919	0.504778	1.22887	0.862027	0.607898	0.259188
ACY3	Acy3	1 hr	1.26757	0.503667	0.0977475	1.07428	3.56653	0.026087	0.729335	0	0.0421163	0.0834468	0.0128863	0	0.202252	0.163594	0	1.4329	0.449921	1.1197	0	0	0.0207438	2.94987
ACYP1	Acyp1	1 hr	0	0.0514586	0.0903151	0	2.4063	1.214	1.83116	2.63454	2.90863	1.94107	1.28751	7.17025	2.21447	2.4105	0.831739	0	0.0402567	0.236639	2.13011	0.395216	0.963361	4.76219
ADAM8	Adam8	1 hr	6.67366	5.28094	5.24339	0.181886	0.981807	0.67039	2.63734	0	0.141837	0.46118	0.483499	1.96341	2.61607	4.20089	1.99448	0.522921	2.90642	4.99351	1.26924	0.779897	0.957194	1.28759
ADAMTS1	Adamts1	1 hr	1.04192	1.46789	0.483563	1.75606	0.664657	4.78649	0.767253	0.707786	0.164526	1.1098	8.32441	0.500246	2.7193	1.31331	0.751226	0.205514	0.552609	0.329882	1.03105	2.29071	2.8079	1.13174
ADAMTS15	Adamts15	1 hr	0.392445	1.84135	3.25561	0.351617	2.00033	1.10879	0.44082	2.68748	0.336646	0.471255	0.491669	3.63915	0.255361	0.290374	1.82415	0.847864	0.250041	1.52883	1.75153	2.12677	0.168261	2.32238
ADAMTS4	Adamts4	1 hr	0.0852453	1.45204	0.697586	1.3443	0.196489	0.278735	0.44535	0	0.18274	1.10956	0.952947	0.0517471	0.678212	0.333856	0	1.2743	0.301858	1.06944	2.11101	1.3353	2.57798	0.291484
ADAMTS6	Adamts6	1 hr	5.1911	0.6211	1.21199	1.09484	0.252313	0.0639012	0.234304	0	0.210003	0.54316	0.435303	0.0400835	0.182022	0.386118	2.39	0	0.577241	0.116862	1.12021	1.03433	0.990953	0.109503
ADAP2	Adap2	1 hr	4.80298	0.567045	2.94279	1.54703	1.14931	0.52016	1.30748	1.55623	0.459828	1.40832	1.52704	3.46525	1.9874	1.18929	1.73882	0	2.24146	1.60931	2.04702	2.68201	0.698677	1.7413
ADAR	Adar	1 hr	0.453913	0.755106	0.201827	0.589767	0.827863	1.00523	0.555233	0.161141	0.348177	0.880755	1.3976	0.565693	0.994658	1.00085	0.733835	0.389493	1.18473	0.80704	0.536644	0.488435	0.555755	0.212566
ADARB1	Adarb1	1 hr	0.122491	1.05241	4.26276	3.46855	2.26246	1.52495	1.58709	1.03281	1.19154	3.10178	1.23541	1.82227	1.30789	2.37375	6.51472	0.154144	2.17326	1.95246	2.68624	0.770253	1.89305	5.25808
ADCK2	Adck2	1 hr	1.18461	0.115561	0.280525	2.56983	0.505203	1.05444	1.94413	0	0.627208	1.04649	0.542578	2.4111	1.23079	0.607876	3.73532	0.88389	1.4153	1.43313	1.6679	0.242506	0.591122	0
ADCK5	Adck5	1 hr	20.0925	2.03432	1.38838	0.0872892	3.58856	1.19926	3.08955	10.5339	1.19441	1.36317	0.517916	6.3178	0.777359	1.13815	18.7313	0.961151	0.48397	5.09769	1.8098	0.547497	0	4.77278
ADCY6	Adcy6	1 hr	0.288309	2.70174	1.61117	4.85098	1.27886	1.97411	1.9484	1.18914	0.449058	2.32318	1.28189	2.02158	1.05806	2.4193	2.04545	1.2729	2.23552	0.945625	2.16466	2.10738	1.18717	5.13667
ADD1	Add1	1 hr	0.264318	0.367112	0.265032	0.827026	1.0536	0.786124	0.78056	0.530943	1.03299	1.21466	0.941838	0.817878	0.555798	0.878599	2.29871	0.0880356	1.06813	1.28961	0.90958	0.713655	0.974518	0.750411
ADD3	Add3	1 hr	0.193385	0.113271	0.0614014	0.253679	1.25514	0.921966	0.396274	0.203213	0.334953	0.788497	1.33136	0.632672	1.57961	0.570055	0.599217	0.96668	0.483165	0.296449	0.238882	0.348994	0.402295	0.506845
ADGRE1	Adgre1	1 hr	20.2398	0.0991117	0	0.29827	0	0	0	0	0	0.0673212	0.0584385	1.10753	0.402992	0.140252	0	0	0.197288	0.316036	0.379149	0.101917	0.83123	0
ADGRE5	Adgre5	1 hr	0.730848	0.415862	0.398716	0.624685	0.731491	0.433508	1.196	1.39818	1.09834	2.08624	1.73725	1.39926	1.20822	2.12153	6.11419	0.202894	0.947387	0.575248	1.89042	1.6603	0.943672	1.43183
ADGRF5	Adgrf5	1 hr	0.166853	0.362099	0.426191	0.376333	0.370303	0.116321	0.395113	0.138234	0.392103	1.2756	0.41765	0.174182	0.486399	0.21013	0	0.350125	0.497637	0.432684	0.242007	0.225326	0.236613	0.234378
ADGRG1	Adgrg1	1 hr	0.0108035	0.778931	0.855627	0.95943	0.557568	2.19525	1.77987	1.61625	0.0882142	0.558301	1.36983	0.724932	1.32211	0.887398	0.0223403	0.508139	0.249345	0.519384	0.675494	0.815102	1.4341	2.22074
ADGRG2	Adgrg2	1 hr	0	4.32446	3.49468	0.175932	0.333406	0	0	0	0.52858	0.375818	0.0679379	0	0	0.0636181	0	2.2392	3.53238	1.52605	0.0695087	0.159045	0	0
ADGRG6	Adgrg6	1 hr	3.98714	0.432878	0.72818	0.211345	1.16545	0.209709	0.788044	1.13741	0.126495	0.795406	0.548515	0.303483	0.803735	1.00898	0	0	0.179591	0.0897583	0.821359	0.574245	0.589862	0
ADGRL4	Adgrl4	1 hr	1.01438	0.0445998	0.725911	0.666594	0.199122	0.212187	0.197471	0	1.34445	0.626049	0.839137	0.355747	1.46909	0.237265	0	0	0.303489	0.583552	0.0783875	0.0327366	0.980445	0.545109
ADIPOR1	Adipor1	1 hr	0.141772	0.315618	0.43668	0.324209	0.803002	0.55096	0.523257	0	1.16938	0.633256	0.635246	0.338378	0.904139	0.456817	0.749194	5.81744	0.735628	0.449763	0.266693	0.432973	0.792331	0.0702981
ADIPOR2	Adipor2	1 hr	0.298537	0.789712	0.546613	2.06117	0.838286	1.04194	0.724393	2.32237	2.08644	0.958893	0.909866	2.21859	0.945995	0.616307	0.57618	2.89078	1.67891	0.229899	0.121361	0.126716	0.88754	0.273797
ADK	Adk	1 hr	0.107624	0.241286	1.54524	1.07876	1.18544	1.74439	0.562263	0	2.40039	0.965774	1.37875	0.373843	1.80846	0.296676	0.564473	0.312772	0.451799	3.77788	1.39611	0.0639115	0.0784297	0.974137
ADORA2A	Adora2a	1 hr	74.6391	1.15038	75.5323	45.7173	6.00902	8.93233	0	0	0	5.03459	1.69173	67.0737	20.1383	0	38.9233	0	2.28722	16.3353	4.33083	31.006	9.62256	303.253
ADORA2B	Adora2b	1 hr	21.3158	16.4436	2.03008	0	0	1.54286	0	0	6.11729	4.6015	0.541353	0	0	14.0887	0	47.2602	0.879699	20.4767	4.33083	0	0	0
ADPRH	Adprh	1 hr	0	2.95912	0.0313378	0.400706	0.264282	0.26073	0.969591	0	1.24077	0.511224	0.690058	0	0.823139	0.591239	0.677941	0	1.01012	0.905871	1.14508	0.149377	0.284129	1.54119
ADRA1A	Adra1a	1 hr	0	0.822806	0.861628	1.17041	0.919111	0.35693	0	0	0.29042	0.379201	0.100217	2.03805	0	0.0487544	11.763	0	2.8747	0.203444	1.8313	0.689483	0.0665106	0
ADRA2A	Adra2a	1 hr	0	0	4.63113	2.95845	2.15046	0.211194	0.81232	6.17354	0.328044	3.77467	0.394691	1.38229	1.11613	1.01572	10.2598	0	0.874639	3.28866	3.3605	1.61815	3.74308	6.40897
ADRA2B	Adra2b	1 hr	0	0.0735449	1.74607	8.8284	0.755962	0.244149	1.21074	0	1.53394	1.18122	0.875035	8.39313	1.07616	3.84585	0	3.4286	0.818	1.32581	2.74218	2.64011	0.680416	0
ADRB2	Adrb2	1 hr	0	0.219563	0.267204	0	0	0.928999	0.751899	0	8.97204	0.519908	0.944534	3.30794	0	0.822325	0	3.28205	0.119102	0	2.71968	0	0.136709	0
ADRM1	Adrm1	1 hr	0	0.200191	0.780675	2.84864	1.38853	1.07798	1.41994	1.25141	2.20315	1.01999	0.744883	0.984726	1.16088	1.10509	1.19194	0.500214	0.211859	1.00043	0.827082	2.47905	1.03227	1.07859
AEBP1	Aebp1	1 hr	0.791709	1.14268	1.29402	2.59909	1.13593	0.725005	1.30122	1.56533	0.136224	3.6867	1.4888	0.709777	1.61233	3.1184	14.0148	1.06663	1.33104	1.62183	2.62927	2.43633	1.18993	2.09768
AFAP1L1	Afap1l1	1 hr	2.0973	1.38732	1.29761	1.35976	0.791739	0.300373	0.4383	0	1.36126	0.377286	0.384926	1.20949	0.579841	0.765877	0.828646	0.537719	0.559038	0.178293	1.02552	0.588461	0.172099	1.21481
AFG3L2	Afg3l2	1 hr	0.459207	0.417083	1.51381	0.148739	1.17542	1.23419	0.594848	0.191385	1.73087	0.653312	0.805881	0.509817	0.913845	0.459359	0.494977	0.416953	0.359293	0.88619	0.553529	0.281225	0.504464	0.187012
AFM	Afm	1 hr	0.568733	0.058965	0	0.646819	2.6808	0	0.334475	0	0	0	0.00194123	0.855987	0	0	0	0	0.0980809	0.0900733	0.127442	0	0.0484338	0
AFMID	Afmid	1 hr	1.06011	0.724751	0.0969746	0.214461	2.90113	0.336852	1.05158	0.320946	0.135696	0.346917	0.371437	0.958104	0.123628	0.585856	0.152541	0.36713	0.512763	0.774816	0.331138	0.0976995	0.00942453	0.955545
AFP	Afp	1 hr	0	0.273711	0.845346	0	0.108363	0	0	0	0	0.0307077	0.0608248	0	0.409829	0	0	0	1.42761	0.1996	0	0	1.54572	0
AFTPH	Aftph	1 hr	0.267342	0.00444959	0.0920803	0.357852	1.15857	0.931534	0.444488	0.746746	0.737428	0.783023	1.09863	0.779934	1.21024	0.225202	2.33467	1.85626	0.197771	0.397793	0.551749	0.559235	0.865157	0.51521
AGAP3	Agap3	1 hr	1.35051	1.68779	0.760664	0.890994	0.992182	0.614423	1.98657	1.14063	0.796003	0.988139	0.778622	2.95748	1.51555	1.94839	2.00579	3.04575	1.16883	1.34904	1.46183	1.3859	0.740763	0.777625
AGFG1	Agfg1	1 hr	2.32554	0.786191	0.990707	1.42999	1.33201	1.06287	0.874964	0.406904	0.89208	1.04562	1.50299	0.68923	1.99474	0.786653	0.454645	0.327105	0.924277	1.43786	1.33604	0.389834	0.436464	1.79295
AGFG2	Agfg2	1 hr	9.81138	4.52765	3.52757	1.27089	0.582239	1.17907	0.915791	0	0.422137	0.837123	0.70334	0.645745	2.57735	1.39943	1.41764	0.653469	0.910832	1.84531	1.44501	1.15265	2.05366	1.67043
AGO1	Ago1	1 hr	0.660425	0.812971	0.535437	0.576545	1.18549	0.532835	0.932061	0.462658	0.70598	0.671073	0.664025	1.31429	0.608367	0.535225	0.517529	1.10342	1.68272	1.42261	0.600956	1.00932	0.47267	0.881001
AGPAT2	Agpat2	1 hr	2.2408	0.0479617	0.462338	0.716841	1.94269	1.18596	1.02883	0	1.06145	0.847	1.17385	1.95464	1.76069	1.13316	0	0.404848	0.0681476	1.22714	0.337347	1.247	0.161164	0.182642
AGPAT3	Agpat3	1 hr	0.0689465	0.369403	0.411332	0.383553	2.13323	0.755804	0.822316	0.425395	0.924736	0.671707	0.533575	0.659926	0.844638	0.684901	0.460107	0.398899	0.358926	0.846073	0.875199	0.547595	1.33798	0.607216
AGPAT5	Agpat5	1 hr	0	1.30797	0.0572359	0.0631569	1.62277	0.727996	0.264611	1.71355	1.62883	0.894629	0.829216	0.226688	0.824564	0.286321	1.11765	0.933538	1.52676	1.35252	0.114331	2.24686	1.11822	0.159443
AGPS	Agps	1 hr	0.270163	0.256565	0.164297	0.762295	1.63689	0.685146	0.816168	0	0.871	0.982065	1.24099	0.376468	0.714502	1.07721	0.708782	1.69689	0.744817	1.94797	0.631153	0.0087188	0.377348	0.393626
AGRN	Agrn	1 hr	0.30922	0.609139	0.710931	0.558772	0.775362	1.68326	1.47301	0.675359	0.0489363	0.993475	0.98518	0.944859	1.50794	1.03935	0.503793	0.072826	0.532492	0.908084	1.17868	0.928488	1.37904	0.83283
AGT	Agt	1 hr	0.17313	0.00934351	0.14356	0	7.11536	0.298003	0.206327	1.68128	0.659652	0.222815	0.0682626	0.448598	0.0467176	0.668006	1.60445	0.41738	0.179725	0.0526534	0	0.184672	0.30251	0.256342
AGTRAP	Agtrap	1 hr	2.51281	3.89477	1.29826	1.87075	1.61854	1.04902	1.12342	0	1.24841	1.35257	1.36001	0.154005	0.66252	0.587749	1.55419	0.73729	0.156981	6.34546	1.18108	1.39088	6.14793	2.29631
AHCY	Ahcy	1 hr	0.277913	0.683229	0.180102	1.15488	1.8969	0.439206	0.988718	0	0.682352	0.325919	0.343324	1.28956	0.655653	0.330742	0.218332	0.319738	0.581385	0.270854	0.0355556	0.302595	0.379187	0.822953
AHCYL2	Ahcyl2	1 hr	0	1.20118	0.0139283	0.0158718	0.763465	0.583315	0.903774	0	1.46744	0.717253	0.585528	1.26494	0.348153	0.848654	0.587904	0	0.485601	0.0171674	0.818098	0.123681	0.635249	0.125895
AHSA1	Ahsa1	1 hr	1.08054	0.135309	0.203309	0.0571127	0.836993	0.923602	0.958543	0	2.09318	0.777901	0.631902	0	0.674365	0.884405	1.4048	0.785869	0.535988	0.330204	0.700645	0.850751	1.10721	0.608493
AIDA	Aida	1 hr	0.119491	0.826098	0.308188	0.681378	1.49469	0.831004	1.01357	0	2.04413	1.20069	0.759169	1.33735	0.653344	0.581335	2.45044	0.555229	1.26481	0.160314	1.16617	0.655097	1.51536	1.08155
AIF1	Aif1	1 hr	9.64041	6.46988	1.59417	2.02766	0	1.10313	0	0	0.841851	2.4077	1.30457	0	0	3.28427	0	0	10.8116	0	2.25605	2.06512	0	1.06522
AIF1L	Aif1l	1 hr	0.0124369	0.265779	0.237376	0.262549	0.559899	1.30551	0.346347	0.135448	0.0532537	0.957809	1.73469	0.223557	0.974368	0.55002	0.025624	0.300216	0.163938	1.62305	0.554529	0.322776	0.686092	0.168463
AIFM2	Aifm2	1 hr	3.15871	0.639033	0.0203298	0.926496	1.30653	1.23185	1.58098	0	0.851954	0.902778	0.414321	3.045	0	0.406596	0.527355	0	1.62964	0.251547	1.05241	0.715202	2.34497	0.491981
AIG1	Aig1	1 hr	0.343832	0.557272	0.41993	0.293447	2.5036	0.815797	0.693744	0.764109	1.34701	0.573256	0.806936	0.430528	0.278158	0.176433	0	2.45712	0.209791	2.18087	0.578207	0.0189377	0.0431744	1.52179
AIMP1	Aimp1	1 hr	0.109157	0.204282	0.540921	0.594119	0.82011	1.06091	0.499988	0.844914	1.90466	0.726697	0.892531	0.421656	0.855078	0.51203	0.230798	2.34377	0.363984	0.554345	0.837125	0.426572	0.0187268	0.128822
AIMP2	Aimp2	1 hr	0	0.169996	1.93147	0.0429162	0.739112	0.891464	1.64321	0	4.2828	0.510464	0.4778	0	1.31777	1.10175	0.85284	0.905293	0.0274187	0.0758186	0.124457	0.546228	0.169519	0
AIP	Aip	1 hr	0.610817	1.22503	1.02515	0.21148	0.684517	1.11738	1.04538	1.24427	1.02953	0.767411	0.558619	0.335115	0.894865	0.950883	2.99439	1.90601	1.18316	0.374864	0.371469	1.61262	3.27971	1.21583
AJUBA	Ajuba	1 hr	0.951553	2.14352	1.33757	2.2796	2.32867	1.20409	2.16652	1.66754	0.136789	0.885937	1.31144	0.609107	1.642	0.744655	0.677738	0.365204	0.460614	0.475983	2.38021	1.81668	1.49776	1.72169
AK1	Ak1	1 hr	1.46866	1.54443	0.203617	0.0994699	1.18273	1.08341	0.81556	1.37138	19.9306	1.40957	0.850795	2.90427	0.33536	1.09401	1.06034	5.00452	0.0491113	1.49579	2.5435	1.42688	0.5198	4.72934
AK2	Ak2	1 hr	1.04931	0.409661	0.0395372	0.225749	1.9395	0.896064	1.10952	0.758895	0.699105	0.809089	1.01634	0.394403	0.455858	0.870635	0.929486	0.360436	0.520764	0.484376	0.81587	0.482499	1.08382	0.335642
AK4	Ak4	1 hr	0.229849	0.12582	0.018162	0.134077	3.65778	0.119916	0.442321	2.06619	0.0471506	0.0694118	0.0960468	0.365358	0.00833569	0.24405	0.269743	0.406605	0.260093	0.334565	0.031558	0.194251	0.0774533	0.121074
AK7	Ak7	1 hr	1.67908	0.408744	2.01442	0.830645	0.456586	2.13791	0.613116	1.49414	0	0.569461	1.37544	0.0618947	0.543747	0.376003	0	0	0.722853	2.30969	2.9702	1.25987	0.686075	0
AKAP12	Akap12	1 hr	0.0691903	0.623972	0.427659	0.837974	2.68345	0.615539	1.46492	0.158475	0.164738	1.67728	0.6099	1.02235	1.1231	0.697306	1.26929	0.335855	1.338	1.07133	0.626216	0.614258	0.771676	0.572513
AKAP7	Akap7	1 hr	0	0.040416	0.176534	3.76269	1.54019	1.25957	0.138406	0	2.47091	0.643225	0.782203	0.45163	2.37082	0.910123	0.993815	0.377852	0.0123917	1.08189	0.605287	0	3.29848	0.444576
AKIP1	Akip1	1 hr	0.507384	0.0649134	0.40891	1.03552	0.196065	1.83347	0	12.9054	2.69722	0.917178	0.791767	0.182817	0.707865	0.252147	7.21201	1.81713	0.0507826	0.532996	0.516658	0	0	0
AKIRIN2	Akirin2	1 hr	0	1.27301	0.19198	0.0937852	0.639592	0.791147	0.850388	0	3.73377	1.17011	1.44426	0	1.31196	0.345006	2.62922	0.908158	0.111866	0.32913	1.46631	0.775713	0.146705	0.533606
AKNAD1	Aknad1	1 hr	41.055	3.1611	0.173433	0	0	0.131809	0	8.7017	0	0.0381552	0.0115622	0	0	0	0	0	0.649794	0.211588	0.204651	1.30537	2.60727	0
AKR1A1	Akr1a1	1 hr	0.0864513	0.382887	0.325436	0.226733	2.59928	0.350157	1.94607	0.36548	0.287257	0.474458	0.418689	0.716258	0.330007	0.978282	0.105175	0.31483	1.10609	0.190675	0.617629	0.282393	0.167819	1.02162
AKR1B1	Akr1b3	1 hr	0.144432	0.0653842	0.0372314	0.509501	0.538663	1.01368	0.425593	0	2.80042	0.675392	0.654759	0.037965	1.24954	0.675942	0.217886	1.6601	0.714549	18.1697	0.107292	0.210091	0.0202663	0.103716
AKR1B10	Akr1b8	1 hr	0.392581	7.0371	2.00895	0	0.25558	0	1.73841	13.3201	0.436329	0.0828909	0.111097	0.238311	0.373585	0	0	0	0.438056	0.105341	0.184202	0.411577	1.91916	0
AKR1D1	Akr1d1	1 hr	1.03516	0	4.66187	0	0	0.195402	0	0	0	0.0450524	0.249884	0.21688	0	0.299127	0	0	0.856519	0.250931	0	0.212165	0.260361	0
AKR7L	Akr7a5	1 hr	1.51446	0.0557642	0	0	1.31581	0.168419	0.982163	2.2822	0.127676	0.119226	0.0704093	0.0777319	0.334397	0.10721	0.835712	0	0.10552	0.0597071	1.14251	0	1.4893	1.15903
AKT1	Akt1	1 hr	0.527167	1.07513	0.781237	2.07694	0.828036	0.924582	1.67713	0.500902	0.888656	1.31725	1.10647	1.52678	1.11007	1.52164	1.50209	0.382579	1.51152	2.08974	1.46138	1.41582	1.25967	0.698676
AKT1S1	Akt1s1	1 hr	0.0737882	0.453873	1.25159	0.207516	0.685625	0.938366	1.81127	0	2.92264	1.18862	0.798038	0.536209	0.736476	1.88052	0.653924	0.271242	0.467181	0.984132	1.31196	1.85985	1.10736	0.392744
AKT2	Akt2	1 hr	0.409577	0.0832209	0.734875	0.0420845	1.02593	0.990518	1.94067	1.15689	1.25386	1.02261	0.847963	1.58452	0.84676	1.26596	0.727399	0.551074	0.627329	1.00438	1.10981	1.27019	0.924	1.19543
AKTIP	Aktip	1 hr	0	1.10032	0	1.59687	1.27594	2.17285	1.59371	0	6.07476	1.14991	1.69431	0	0.709595	1.08753	4.67704	0.500491	0.763609	0.545502	0.0505387	1.44541	0.0349033	0.178623
ALAD	Alad	1 hr	0.0261957	0.446211	0.311161	0.511931	1.40881	0.62912	0.783836	0.383871	0.68639	0.668145	0.395625	0.122682	0.418786	0.691268	1.32062	0.305246	0.558445	0.532326	0.994477	0.20269	0.332209	0.425853
ALAS1	Alas1	1 hr	0.0599343	0.546137	0.118617	0.0454854	0.710187	1.59209	0.359501	0	1.81608	0.571905	0.465025	0.258515	0.671118	0.640342	0.520526	0.531793	0.171874	0.322258	0.850973	0.0372959	0.0520578	0.121642
ALDH16A1	Aldh16a1	1 hr	1.78823	2.07223	0.482221	0.387952	0.625072	0.806329	1.73157	1.42302	0.291288	1.01532	0.917757	3.0287	1.69755	2.32422	1.07258	0.283307	0.376879	0.907382	3.96192	1.71481	1.40726	1.35708
ALDH1A1	Aldh1a7	1 hr	0.0355897	0.0166962	0.0628583	0.0207847	1.23836	0.951845	0.34066	0.365857	0.387903	0.496041	0.685372	0.38621	0.431039	0.348405	0.455192	0.210404	0.285348	0.288176	0.189836	0.124312	0.417585	0.154804
ALDH1L1	Aldh1l1	1 hr	0.164768	0.461526	0.281798	0.412582	2.3528	0.425518	0.843878	0.409411	0.5592	0.247775	0.0806333	0.925853	0.115357	0.38134	0.182762	0.590403	0.362276	0.036105	0.0960791	0.310044	0.214354	0.239176
ALDH2	Aldh2	1 hr	0.353715	0.0927781	0.0828779	0.160835	1.58667	0.630428	0.484617	2.25322	1.01989	0.543382	0.21213	1.78704	0.309946	0.52995	0.560374	0.23691	0.124997	0.401189	0.438677	0.479117	0.623452	0.0327401
ALDH3B1	Aldh3b1	1 hr	2.14185	0.735334	9.04733	0.152851	2.38655	0.12761	0.624552	2.50049	0.245754	1.23315	0.768113	4.79992	1.91117	1.8081	0.827361	0.721311	4.54014	0.76005	0.460307	0.924996	0.804398	1.94342
ALDH3B2	Aldh3b3	1 hr	0.386987	2.38037	6.56402	0.254208	0.678078	0.276906	0	0	0	0.124834	0.127672	0	0.330811	0	2.20787	0	0.725175	16.91	0	0.640628	0.0749007	0
ALDH6A1	Aldh6a1	1 hr	0.0371022	0.206766	0.00762322	0.00841183	3.29164	0.290546	0.413776	0.304685	0.562748	0.169757	0.192871	0.893644	0.280801	0.310449	0.0978814	0.128675	0.00433735	0.425774	0.13534	0.0315444	0.177155	0.0921921
ALDH7A1	Aldh7a1	1 hr	0.68466	0.267238	1.11661	0.427096	1.11461	0.815959	0.227435	0	0.46997	0.656815	0.491781	0.531871	0.614548	0.274414	0.49096	0.101384	0.541438	0.358234	0.394289	0.725927	0.035627	0.263347
ALDH8A1	Aldh8a1	1 hr	0	0.266855	0.115126	0.00911285	2.40954	0.0826232	0.743001	0	0.20428	0.0916854	0.202963	0.754291	0.239364	0.226302	0	0.495131	0.191269	1.00297	0.0162006	0.0850532	0.996996	0
ALDH9A1	Aldh9a1	1 hr	0	0.396375	0.1491	0.631048	1.38582	0.638524	0.175203	0.472976	1.04665	0.515527	0.621691	0.211731	0.433885	0.355148	0.312426	0.232451	0.918183	0.469045	0.0346476	0.00931341	1.0399	0.0996278
ALDOA	Aldoa	1 hr	0.0374338	0.628787	1.07861	0.468043	0.879091	1.77203	0.919379	1.52892	5.52289	0.848961	0.82666	1.11785	0.962952	0.794505	1.40351	0.479881	0.796783	1.02862	0.60996	0.619195	1.13351	0.685699
ALDOB	Aldob	1 hr	0.00772217	0.0628149	0.0105466	0.00797198	0.918663	0.00153896	0.0403796	0.0725993	0.00202582	0.000113052	0.000434885	0.184709	0.000855182	0.0181849	0.00696454	0.166479	0.0584095	0.0343468	0.00190456	0.0419267	0.142565	0.0021261
ALDOC	Aldoc	1 hr	0	0.0458991	0.139317	0.344513	0.458451	0.820244	0	0	0.367193	0.417952	0.293754	6.53603	0.694966	0.161997	0	0	0.227875	0.258655	0.281874	4.55049	0.0712786	0
ALG1	Alg1	1 hr	1.34967	0.543828	3.07098	5.8656	1.46905	1.51583	2.59746	0	0.885622	1.10401	1.0492	5.6208	0.646567	1.37005	3.16511	4.18246	0.469213	0.0912598	0.232741	1.07302	11.0384	4.64995
ALG5	Alg5	1 hr	0	0.0700288	0.53618	0	1.67998	1.51022	0.171182	0	0.981111	0.704297	1.64462	0.0976159	2.1044	0.134635	0	0	0.132512	0.916269	2.08601	1.06599	0.5317	0
ALKBH3	Alkbh3	1 hr	0.711503	0.142221	0	2.25559	0.975997	1.1258	0.602394	0	2.75027	1.11503	1.18424	1.69648	0.53617	0.231782	0	3.01416	1.90532	1.81436	1.09328	0.0807846	0.0440824	0.979388
ALKBH5	Alkbh5	1 hr	0.225344	0.0156028	0.593403	0.508446	0.978895	0.830802	0.823478	0.506615	3.29437	0.749812	0.713495	0.604619	0.75935	0.900958	0.612401	1.37976	0.762211	0.738253	0.578105	0.608014	0.223628	0.375459
ALKBH6	Alkbh6	1 hr	4.84251	0.917951	1.05603	2.3348	2.93756	2.57855	0.789474	0	2.29698	2.47529	1.61437	3.4989	3.09005	3.36382	4.6702	0	0.981589	9.27496	4.3274	1.81609	0.0792475	2.17931
ALKBH7	Alkbh7	1 hr	0.520106	0.973357	4.65911	0	1.22367	1.40029	2.10201	2.31521	3.81973	0.879127	0.539847	0.423245	0.153452	1.2163	0.625391	0	2.36759	0.240839	0.213465	1.81669	0.724359	0.955459
ALOX5AP	Alox5ap	1 hr	2.30157	1.27181	0	0	0.369316	0.889187	0	0	0.301941	0.659612	0.276987	0	2.86054	0.757763	0	0	0.467468	0.26451	0	0	0	6.13614
ALPL	Alpl	1 hr	1.15181	0.307825	1.75136	0	2.04489	0.12036	0.71732	3.00304	0	0.148508	0.105048	1.57065	0	0.373579	0.470407	0.356802	0.812798	1.28399	0.357478	0.0245449	0	0.262563
ALS2CL	Als2cl	1 hr	0.212236	0.226705	0.8524	0.216193	0.422426	0.408459	1.41807	1.52105	0.132269	0.817262	0.260937	0.583107	0.222062	0.652525	0.217125	0.119822	0.521971	0.484787	0.395669	0.376519	0.0718195	0.672851
ALYREF	Alyref	1 hr	0	0.020792	0.700323	3.08896	1.3757	0.719159	1.13524	0	2.2722	1.36126	0.757563	1.86712	0.756095	0.222841	3.60656	1.33093	0.924143	2.45468	1.62814	0.914603	0.332672	0.276656
AMACR	Amacr	1 hr	0	0.0157615	0	0.0830724	1.90862	1.06937	1.37032	0	0.781585	0.578725	0.903783	2.93887	0.108105	0.242727	0	3.70488	0.0213244	0.565189	0.216952	0.0750989	0.0628606	0
AMD1	Amd1	1 hr	0.0775692	1.36453	0.314266	0.0314217	1.01037	1.0905	0.824499	0.370658	0.820559	0.894041	1.47515	0.0203896	0.939646	0.409418	0.383118	0.608192	1.40807	0.304268	0.777219	0.112832	1.01579	0.178779
AMDHD2	Amdhd2	1 hr	0.842236	0.238282	0.582757	0.352724	1.08104	0.650733	2.30106	1.87608	0.316804	0.67642	0.332571	2.66203	0.235254	1.46488	2.98082	0.330901	0.0176466	1.19078	1.64782	0.806316	0.412347	1.69189
AMFR	Amfr	1 hr	0.0270173	0.0285692	0.56092	0.066826	1.0121	1.41235	0.530282	0.820277	1.05424	0.770522	1.00571	0.46054	0.714724	0.510366	0.356633	0.103649	0.356633	0.832198	0.6791	0.23288	0.506415	0.202101
AMOTL1	Amotl1	1 hr	0.754274	0.460905	0.194808	1.02376	0.730699	0.618194	0.371502	0.739655	2.84668	1.07546	0.601154	0.639912	1.23954	0.927982	0.891173	0.570334	1.30262	0.33076	0.636726	0.852852	0.328995	0.17917
AMOTL2	Amotl2	1 hr	0.339896	0.678666	0.736352	1.37752	1.78125	1.45803	0.897751	0.325297	0.32902	1.20181	1.77799	1.56179	1.25521	0.859269	2.10387	0.126983	0.489415	1.30596	0.892877	1.04551	1.05386	0.576471
AMPD3	Ampd3	1 hr	7.8507	3.77268	0.578517	2.36302	0.217196	0.900052	0.758332	0.571821	0.632799	0.494395	0.826852	0.552903	0.347344	0.912014	0	1.28081	1.11829	1.79042	1.32333	0.293906	1.17485	0.319195
AMT	Amt	1 hr	0.687657	0.564856	0.0201975	1.08434	1.28846	0.655341	0.62491	1.01338	0.9	1.13281	0.366382	1.38743	0.650628	1.14022	2.02069	0.554084	0.134381	0.0246409	0.0702873	0.503456	0.134381	1.32522
AMZ2	Amz2	1 hr	2.34299	0.293397	0.518756	0.938354	0.617807	0.935564	0.911204	3.02722	2.68704	0.79949	0.724477	0.172561	1.52161	0.233515	3.02722	0.782641	0.0181361	3.92909	0.281807	1.29721	2.71902	2.64905
ANAPC13	Anapc13	1 hr	0	0.0207793	0.0212034	0.71088	0.324695	0.822551	1.12887	0	1.25637	0.479763	0.997126	0.129341	0.948217	0.307591	1.89714	0.536729	0.0794421	1.41851	0.11464	0.237478	0.100504	0
ANAPC15	Anapc15	1 hr	0	0.929102	0	0	1.33906	1.40949	1.15855	0	3.76314	1.0631	0.858451	0	0.522246	1.34592	2.01457	1.61524	3.50888	0.411064	0.179619	1.52864	0.738409	0
ANAPC2	Anapc2	1 hr	1.91068	1.05171	1.40823	0.401873	1.0891	1.05932	2.13593	0	0.857794	1.32331	0.861506	1.26293	1.48763	1.66978	0.529343	0.46932	0.342031	1.49768	2.34397	1.4984	3.98179	0.328632
ANAPC4	Anapc4	1 hr	0	0.140441	0.645103	0.328504	2.75437	2.16845	1.16641	1.01672	1.41943	2.09251	3.37543	0.78277	1.37031	1.6216	0.375087	0.403637	0.279148	0.399245	0.769361	0.522578	0.260653	0.130731
ANAPC5	Anapc5	1 hr	0.138673	0.405945	0.57975	0.278448	1.46681	1.09144	0.920994	1.43715	1.50255	1.10232	1.43208	0.426242	0.68289	1.12968	0.492547	0.297843	0.330219	1.52645	0.709502	0.387001	0.0110758	0.181923
ANAPC7	Anapc7	1 hr	0.0527301	0.0939401	0.100976	1.36433	0.43483	1.20614	0.492586	0	0.948292	0.98293	0.976822	1.07857	1.05352	1.44575	0.771546	1.05715	0.786932	0.955405	0.124403	0.881413	0.404754	2.25186
ANGEL2	Angel2	1 hr	0.970242	0	0.470573	0.0336778	1.73361	1.24448	0.729801	0	1.54151	1.67255	1.94232	2.24359	0.645263	1.14997	0.570461	0.40001	1.66545	1.14951	1.62169	0.698185	0.908614	0.129557
ANGPT2	Angpt2	1 hr	0	1.46322	1.34191	3.50551	0.619876	0.375867	0	0	1.67197	0.498288	1.13898	1.13288	2.76626	1.05293	2.90478	0	4.58397	0	2.00093	1.03794	0.277043	0
ANGPTL7	Angptl7	1 hr	0	0.914466	4.63565	0	1.35928	0.127833	0	0	0.272497	0.0496905	0.292934	1.63538	0	0.092168	0	4.17441	0.0260475	0.366668	0.209181	0	0.712498	0
ANK3	Ank3	1 hr	0.115304	0.237824	0.150302	0.140359	0.977041	0.504763	0.370545	0.140244	0.379866	0.236524	0.345195	0.26554	0.352363	0.26018	0.0371562	0.151427	0.206689	0.502731	0.289174	0.281121	0.195593	0.040303
ANKFY1	Ankfy1	1 hr	0.17705	0.714298	0.568261	0.384084	1.04528	0.843065	0.911734	0	0.797863	1.06336	1.09132	1.00544	1.30561	0.729901	0.911252	0.680494	1.19582	1.28532	0.560524	0.388065	0.424053	0.475418
ANKIB1	Ankib1	1 hr	0.745702	0.0306925	0.460646	0.605671	1.59024	1.0791	1.32641	0.614065	0.82267	1.06205	1.24931	0.881731	1.588	0.793958	0.379416	0.177138	0.0181658	0.039388	0.72702	0.362757	0.81574	0.369989
ANKRD1	Ankrd1	1 hr	6.14793	1.80775	0.213322	1.9055	0.291174	0.785725	0	0	25.1662	0.217781	0.781953	0.551482	0.112834	0.0788812	0	3.76675	0.438305	0.413955	0.0607042	0	0.0757945	0
ANKRD10	Ankrd10	1 hr	0	0.175592	0.0546657	0.826139	1.09989	1.45048	0.854183	0.418322	1.23178	1.59192	2.18303	1.23119	1.29352	1.56789	1.49707	0.323808	0.0131851	1.27489	0.441176	0.573948	1.17552	0.892985
ANKRD13A	Ankrd13a	1 hr	2.90712	0.313298	0.331724	0.200782	1.35751	1.98161	0.962065	0	0.51622	1.29444	1.53291	1.04837	0.745473	1.2901	2.0436	0.825001	0.0971813	0.30991	0.560383	0.718488	0.0201495	0.58499
ANKRD13C	Ankrd13c	1 hr	0	1.08093	0.0228123	0.0564119	1.66088	0.948215	0.563323	5.77727	1.40101	1.18235	1.33081	1.48333	0.805948	1.3767	0.210086	1.24637	1.46008	0.197972	0.48463	0.0192755	0.518318	0.206195
ANKRD16	Ankrd16	1 hr	0.844232	0.673871	1.03575	2.92116	0.831084	0.394747	0.910548	1.58227	0.714746	0.528235	0.468923	1.09091	0.519802	1.21025	1.38576	4.00764	0.288843	0.811075	0.229959	0.327431	0.837801	1.05433
ANKRD28	Ankrd28	1 hr	1.41507	1.75604	1.24221	4.74332	1.01688	1.1711	0.447262	0	1.75144	1.2012	1.34574	0.377191	0.971613	1.03655	0.279199	0	1.16962	0.214267	1.25714	1.64886	0.354707	0.179379
ANKRD34B	Ankrd34b	1 hr	3.01626	4.43599	0.474005	5.68273	0.39094	1.6171	0.55326	0	0	0.948772	1.1431	0	0.494581	0	0	0	0.0495343	9.04496	0.891617	0	0	0
ANKRD35	Ankrd35	1 hr	2.02428	0.768953	0.256609	0.81053	0.0647723	0.106203	0.519783	4.7952	1.93121	0.224077	0.186002	0.595351	0.0479957	1.16619	1.13483	1.09646	1.93456	0.444653	0.63153	0.65954	0.952474	0
ANKRD39	Ankrd39	1 hr	8.63099	0.0880591	0.0898562	0.107827	0.508586	1.33586	3.46546	0	1.7492	0.945887	0.938099	1.41913	2.76637	1.98762	3.5026	0	3.94708	8.60643	1.57308	0	1.9972	2.17452
ANKRD40	Ankrd40	1 hr	0.35634	0.346638	0.0202002	1.35963	0.804427	0.889507	0.50207	0.760992	4.17394	1.39297	1.01912	1.65428	1.31779	0.992399	0.798705	0.407189	1.53586	1.84335	0.575657	0.855276	1.78125	1.06146
ANKRD46	Ankrd46	1 hr	0	0.0747349	0	0.540231	0.747349	0.619272	0.957385	0	2.53932	0.541898	0.566068	1.6814	0.961135	0.91196	1.28466	0	0.138635	0.926824	0.845282	1.17062	0.0987668	0.504252
ANKRD54	Ankrd54	1 hr	2.66801	0.0786404	0.119595	1.68125	1.58665	0.710648	0.685075	1.69125	0.94157	0.766215	0.858892	1.12058	1.10173	1.50647	1.98408	2.24615	0.388587	0.0351863	0.949645	1.48475	0.0424927	0.217463
ANKRD6	Ankrd6	1 hr	1.66338	0.0705757	0.841448	0.467775	0.632742	1.12242	0.765006	0.437163	0.440822	0.628501	0.626701	0.920621	0.362869	0.913128	1.60216	0.164967	0.999213	0.177049	1.34466	0.750774	0.0128372	0.210856
ANKRD65	Ankrd65	1 hr	8.0107	0.991747	0	4.5351	0.599946	1.23989	1.53211	0	0.934609	0.946853	0.102032	3.33113	0.408126	0.648104	5.55133	13.962	0.188554	5.8158	2.14348	0.330582	2.72139	13.2257
ANKS1A	Anks1	1 hr	0.279239	0.548518	0.4611	0.543271	0.902428	0.761771	1.16616	0.580147	0.559041	1.29834	0.548399	1.41084	0.619306	0.852509	0.627487	0.41785	0.449598	0.689797	0.359453	0.490625	0.779142	0.899197
ANKS1B	Anks1b	1 hr	1.35287	0.0100156	0	0.322957	0.543821	0.071763	0.247131	0	0.331839	0.145747	0.109511	1.29367	0	0.171211	0.256533	0.770921	0.0603773	0.143998	0.204518	0.0191337	0.780795	0
ANO10	Ano10	1 hr	0.385469	0.964745	1.9625	1.58424	1.63946	0.844663	1.13605	1.18377	0.754383	0.991235	0.918192	0.397448	0.744449	0.492988	0.528827	0.276587	0.0971952	1.61112	0.0789832	0.0696338	0.509836	0
ANO6	Ano6	1 hr	1.37147	0.656487	0.0499498	0.713268	1.03597	1.10507	0.528449	0	1.50205	1.09349	1.14865	0.841855	1.37017	0.537455	1.82752	1.1727	0.818198	0.839856	0.884446	0.377589	0.534665	0.0797352
ANP32A	Anp32a	1 hr	0.0904665	3.66144	0.912893	2.83278	1.72082	2.20055	1.32807	1.27323	1.79012	2.33162	0.953687	2.39862	1.79069	2.37126	2.24394	2.35255	2.21528	2.73236	5.39845	4.13337	3.89875	3.04425
ANP32B	Anp32b	1 hr	1.26155	22.3415	7.79235	3.10393	2.50631	5.86452	2.83127	4.74026	1.10659	4.66202	2.17391	7.54094	5.16894	4.20791	1.65367	2.61553	5.32435	4.26351	24.7645	11.5403	10.0479	12.3827
ANXA1	Anxa1	1 hr	0.341476	0.011625	0.179832	0.998647	0.944476	0.375086	0.238827	0	1.11664	2.3447	1.4022	2.23889	2.16779	0.389083	2.05921	1.93498	3.54564	0.563459	0.342346	0.666424	0.0562273	1.58496
ANXA11	Anxa11	1 hr	0.0462506	0.482951	0.442687	0.414944	0.75253	1.24841	0.843368	0.46501	0.838516	0.895664	1.02037	1.18534	0.447813	0.762645	1.37255	0.160116	0.717588	1.91762	0.497722	0.822474	0.495707	0.506545
ANXA2	Anxa2	1 hr	0.177724	0.572505	0.0229786	0.137872	0.512999	0.921477	0.289466	0.589801	0.480963	1.67967	0.842814	0.609777	1.63027	0.811249	1.26772	0.116233	1.68109	1.01069	0.233955	0.410712	0.652235	0
ANXA4	Anxa4	1 hr	1.04824	0.423323	1.27953	0.036078	1.79553	1.6968	1.54598	1.4516	0.360271	1.2089	1.52568	0.582677	2.12843	0.649574	0.162634	0.83873	0.244177	1.59083	0.987339	0.476535	0.746951	0.769288
ANXA5	Anxa5	1 hr	1.19861	0.56535	0.165975	0.231568	0.70517	1.29255	0.443577	2.08047	0.493253	1.49158	1.5768	0.601147	2.12332	0.443027	1.87247	0.89517	1.03941	1.81842	0.478916	0.604468	0.378511	0.112452
ANXA6	Anxa6	1 hr	0.388873	0.671382	0.311407	0.815227	0.815518	0.62226	1.14482	1.53882	2.45784	1.73778	0.558355	1.08298	1.1214	1.05345	3.32772	0.403918	2.10669	1.64835	0.673652	0.224716	0.525908	0.471519
ANXA7	Anxa7	1 hr	0.331804	0.171323	0.335742	0	1.07848	1.0258	0.630577	0.94107	1.92541	0.94246	1.17336	1.21603	0.971786	0.758814	2.39495	0.116145	0.557054	1.54668	0.852397	0.0778318	0.302479	0.285986
AP1G2	Ap1g2	1 hr	0.584524	1.30732	1.36821	0.552374	1.20269	1.44051	2.02871	0.329202	0.134988	1.09556	1.06774	0.254928	0.910533	1.57069	0.1702	0.703021	0.782719	0.208387	1.59444	1.34428	0.617068	1.32687
AP1M1	Ap1m1	1 hr	0.202108	0.26729	2.24989	0.149415	0.820348	0.535918	1.06668	0	0.85055	0.775046	0.422886	1.36627	1.41208	0.792823	0.34598	3.35288	0.844943	2.40039	0.902033	0.726367	0.14368	0.547642
AP1M2	Ap1m2	1 hr	1.12221	0.924774	0.898656	0.161071	0.497994	1.43007	0.299216	0	0	0.409144	0.740692	0.268228	0.599608	0.4403	0.199533	0.370178	0.802165	2.61023	0.511011	0.51185	0.385378	0.195838
AP1S1	Ap1s1	1 hr	0.164925	0.071822	2.152	0.0435285	1.81659	1.70825	1.12231	2.12709	0.371685	0.656555	0.597308	0.22127	1.52978	1.00333	0	0.844453	0.184029	3.60803	1.60959	0	1.57888	0
AP1S2	Ap1s2	1 hr	3	1.67001	0	0.225974	0.469658	0.500472	0	4.70366	10.9243	0.842975	1.08276	0.146635	3.56139	1.11606	0	1.75254	1.91299	0.239433	0.287249	0	0.0782763	6.20472
AP2A1	Ap2a1	1 hr	3.1629	0.824753	1.0208	0.442948	1.14967	0.956311	1.67428	2.9704	1.12865	1.31608	0.961326	0.386668	0.589855	1.52504	2.06738	0.625568	1.9535	0.407894	1.0593	1.58517	2.64523	1.96338
AP2A2	Ap2a2	1 hr	0.0478775	1.17362	2.9881	0.427706	0.298938	1.52475	0.384358	0.570609	0.499689	1.48296	1.23457	0.424058	0.282128	1.78092	0.0722267	0	0.441963	0.375633	1.1221	0.745825	0.882527	0.53252
AP2B1	Ap2b1	1 hr	2.40072	0.365846	0.237299	0.398762	0.783734	1.04437	0.542666	0.441487	0.619734	0.894616	0.951783	0.10264	0.95557	0.751399	0.0506509	0.457655	0.35188	1.31393	0.490289	0.22763	0.59418	0.108716
AP2M1	Ap2m1	1 hr	0.317672	0.0756098	0.361917	0.164653	0.728557	1.23151	0.886953	0.49817	0.806927	1.1659	1.17277	0.324051	1.43055	0.64115	0.352716	0.0405242	1.01435	1.0129	0.461101	0.696579	0.652191	0.150831
AP2S1	Ap2s1	1 hr	0	2.04934	0.622521	1.52099	0.543953	0.934877	0.975392	0	2.04742	1.44297	0.699994	1.35673	0.909691	0.432534	0.787322	0.777467	0.208328	0.250487	4.46605	2.71128	0.0361358	2.35293
AP3B1	Ap3b1	1 hr	0.279768	0.902306	0.0542873	0.775206	1.0878	1.31653	0.767328	0.317034	0.458052	0.99639	1.07414	0.355685	1.21457	0.542778	0.333889	0.168806	0.63309	0.305886	1.1901	0.765752	0.0942747	2.02062
AP3D1	Ap3d1	1 hr	0.128606	1.71915	1.31188	1.40884	1.05044	0.89929	0.974633	0.353339	0.634201	0.800341	0.648969	1.07773	0.988372	1.03629	0.565371	0.347727	0.928217	0.897368	1.16082	1.38212	1.08568	0.67285
AP3S1	Ap3s1	1 hr	3.44926	0.711519	0.0901332	0	1.73162	0.664899	1.6406	0	1.85528	1.0816	1.20437	0	0.786556	1.02588	10.3373	2.07728	0.838727	2.53172	0.357203	0	0.157844	0.805871
AP4M1	Ap4m1	1 hr	0.827634	0.143191	4.38254	0.156844	1.16968	1.70393	1.62481	0	0.792975	1.44871	0.999883	2.04038	2.45595	1.16163	1.46271	4.01389	0.0591668	2.99545	0.112032	1.84747	1.16723	3.44568
AP5S1	Ap5s1	1 hr	0	0.0880846	0.16869	2.30848	0.703846	0.719634	0.301648	0	2.17137	0.74581	0.986797	0.380176	0.242233	1.50575	3.61936	0	1.18956	5.96939	0.216887	4.11505	0.2065	1.50824
APAF1	Apaf1	1 hr	1.21727	0.944606	0.987257	2.21062	0.534661	0.990113	1.22926	1.33576	0.48287	0.970184	1.3477	0.539802	2.01602	0.988209	0	1.11699	2.44755	1.08265	0.928929	1.19474	1.24989	1.92526
APBB1	Apbb1	1 hr	0.606177	3.69195	0.533692	0.0610098	1.18969	1.0517	0.706681	0	1.39357	0.979504	0.840176	2.24063	0.472109	1.92592	1.04137	2.68147	3.562	0	1.35379	1.02158	1.34901	0.941158
APBB1IP	Apbb1ip	1 hr	1.58123	2.2735	0.0708796	0.0993682	0.420378	0.268135	0.467327	1.13886	0.215602	0.447385	0.419124	1.4846	1.9272	1.36381	0	0.805771	0.145634	0.255144	0.693412	0.786513	1.50522	2.4311
APBB2	Apbb2	1 hr	0.0963338	0.427657	0.347029	0.655819	0.906068	0.710099	0.655819	0.607563	0.627865	1.74931	1.20522	0.993478	1.30124	0.807615	0.345557	0.0918049	0.44575	0.332862	0.47917	0.220956	0.29469	0.361486
APEX1	Apex1	1 hr	0.0427271	1.06473	0.349648	0.974328	0.798658	1.10357	0.663898	0	1.3714	0.88336	1.15795	0.532835	0.498691	1.00772	0.646482	0	0.563534	0.536031	0.486475	0.714206	0.779988	0.0708568
APH1A	Aph1a	1 hr	2.38471	0.16158	0.0978571	0.0190219	1.16171	1.09661	1.01492	1.05614	0.798074	0.903752	1.03226	0.715646	0.660166	0.878495	1.41829	0.963565	0.0593906	0.599718	0.820584	0.319674	2.00258	1.04008
APIP	Apip	1 hr	0.363956	0.0489897	0.661591	5.23219	1.13069	0.425655	0.82335	0	3.39577	1.45028	0.912548	2.38108	1.64993	0.728143	1.15079	1.53023	0.873033	0	0.120625	2.28865	0	0
APLNR	Aplnr	1 hr	0	3.56387	2.34369	1.02423	0	0	0	6.60205	2.3803	0.0326574	0.502502	0.84119	4.45404	2.15196	0	0	0.11114	0	0.982881	0.188307	0	9.64261
APMAP	Apmap	1 hr	0.72893	1.30356	0.0276094	1.15388	1.10302	2.03365	0.653106	0.511795	0.524103	1.09051	1.24997	2.06466	1.57897	0.892139	0.284119	0.601832	0.64957	3.3689	0.824611	0.469361	1.52138	0.076912
APOB	Apob	1 hr	0.396031	0.413947	2.24348	1.66663	0.201333	0.0176395	0.0727144	0	0.250934	0.0277587	0.089248	0.374465	0	0.0165888	0.159032	1.85718	0.298654	0.34162	0.0646965	0.0120546	2.03534	0.271504
APOBR	Apobr	1 hr	6.18696	9.67128	0.754033	1.88919	0.258186	1.29482	1.83453	2.15926	0.262939	2.03783	0.768293	3.21901	3.03212	6.50435	0	9.54792	3.86609	2.46389	4.64044	5.02113	1.55085	8.10618
APOE	Apoe	1 hr	0	0.138376	0.0424622	0.0841992	2.898	0.0578219	0.439075	0.722287	0.0622356	0.155257	0.0406729	0.81246	0.0752191	0.201189	0.229021	0.097488	0.109689	0.236384	0.154098	0.223539	0.998824	0.112294
APOL3	Apol8	1 hr	5.7814	1.65845	1.17836	0.39615	0.447387	0.327391	1.13548	0	1.28766	1.60365	1.32108	0.241316	1.14424	0.926963	0	0.355709	2.48579	0.774065	2.89039	0.041255	1.12244	0.500153
APOLD1	Apold1	1 hr	0.0851756	0.600455	0.130395	0.329064	0.368353	0.145518	0.304008	0.901053	0.299115	0.335958	0.191775	0	0.490223	0.161307	0.176133	0.42269	0.754497	0.165978	0.739449	0.845084	1.04575	0
APOM	Apom	1 hr	16.3638	7.63621	0.511934	3.20082	0	0.136626	0	0	2.06091	0.205761	0.102881	0	0	0.653498	0	0	1.66337	0	0.66749	3.72099	0	0
APPL2	Appl2	1 hr	0.315665	1.00633	3.08767	0.383223	1.17946	0.988345	0.841299	1.06023	0.854464	1.38634	1.0292	0.252247	1.14479	1.23287	1.28491	0	1.32843	0.240194	0.776707	0.520875	0.769537	2.02614
APRT	Aprt	1 hr	0	0.0463264	0.0327781	0.849828	1.21432	1.24732	1.85546	0	1.0395	0.583669	0.631307	0	0.492327	1.4689	1.66928	0	0.0142039	1.66054	0.3516	4.44362	1.00279	0.247147
APTX	Aptx	1 hr	0.289698	0.135906	0.0219913	0.0263895	0.997084	1.23312	1.01043	0	1.206	1.13358	0.858393	0.854434	1.23987	0.940786	1.51285	1.84023	0.966003	2.10632	0.171532	0.0593764	0.0497003	1.08153
AQP1	Aqp1	1 hr	0.0159819	0.0700421	0.231738	0.400356	3.50459	0.153632	0.69992	1.1934	0.218481	0.291767	0.388685	1.27373	0.116572	0.402314	0.352661	0.406762	0.0972502	0.146951	0.198544	0.104537	0.304335	0.0596652
AQP11	Aqp11	1 hr	0	3.98742	11.0715	1.08488	5.70182	0	0	0	0.643213	0.498894	0.215234	0	0	0.471523	0	0	0	2.7856	0.649433	0	0.164224	0
AQP2	Aqp2	1 hr	0.0518256	0.0236387	0.0718825	0.00354113	0.13905	0.225613	0.0894907	0.0405849	0	0.211205	0.00621322	0.00371575	0.0491738	0.31609	0	0.317305	0.00171371	2.93613	0.224127	0.0402194	0.129535	0
AQP3	Aqp3	1 hr	0.0297017	0.00370182	0.0568774	0	0.966785	0.650911	0.36979	0	0.0610583	1.14369	0.111969	0.215838	0.258257	0.389519	0	0.21549	0.0434637	1.69522	0.410597	0.526443	0.171982	0.37432
AQR	Aqr	1 hr	0	0.0695207	0.707256	0.397573	0.707484	1.32194	0.363108	0.552665	0.618548	0.927867	1.23869	0.510379	0.996752	0.482326	0.274809	1.13902	1.69364	1.14148	0.571352	0.313821	0.393254	0.165049
AR	Ar	1 hr	0.0718136	0.947164	0.61436	0.253331	1.0348	0.0789722	0.508258	0.554219	1.10725	0.614451	0.214483	0.551893	0.368871	0.438314	1.92529	3.33703	0.979948	0.102089	0.170164	0.0766012	0.712482	0.223876
ARAP1	Arap1	1 hr	0.12685	1.03072	2.35658	0.647244	1.16463	1.13317	1.60044	1.99301	0.33146	1.31712	1.24099	2.18781	1.69718	2.40314	1.00995	0.218933	1.74962	1.17599	1.73871	1.39628	0.497888	1.68382
ARAP3	Arap3	1 hr	1.46323	0.707662	1.18329	2.25948	0.699295	0.526459	1.97844	0.799859	0.472647	1.07216	1.1254	1.07117	2.11049	1.09695	0.203482	0.369781	1.94795	0.865124	0.493042	2.00966	1.66812	1.04811
ARC	Arc	1 hr	13.1654	0.280757	12.1508	7.38273	0.251926	0.218976	0.49836	0	0	0.449622	0.92533	5.23965	0.400198	0.391961	0	14.5506	0.28968	5.87324	3.76241	2.56662	1.8891	3.37045
ARF1	Arf1	1 hr	0.0753502	0.152387	0.297362	0.610284	0.697488	0.708985	0.460083	1.64488	0.859923	0.887859	0.739249	0.309477	0.863463	0.658411	1.09441	1.66951	0.815336	0.354421	0.510205	0.517902	0.578215	0.691858
ARF3	Arf3	1 hr	1.12726	0.307122	0.5911	1.13119	0.99165	1.25462	0.833073	0.258018	0.331938	1.24559	1.16586	0.145377	1.63608	0.677194	0.741347	0.374765	0.798312	1.31306	0.892678	0.681712	1.20913	0.252122
ARF5	Arf5	1 hr	1.55691	0.275245	0.810629	0.0427029	0.561383	1.17404	0.438649	2.72645	1.25422	0.799735	1.03707	1.89229	1.35792	1.49823	0	0.287881	0.627181	0.442716	0.883834	3.05616	0.0492391	0.52725
ARFGAP2	Arfgap2	1 hr	1.59814	0.178867	0.0516789	0.743819	1.50405	1.23164	1.40108	1.35978	1.45516	1.26959	0.970793	1.52821	1.11087	1.33065	1.64201	0.289313	0.998642	0.124956	0.942554	0.721328	1.24855	0.618752
ARFGEF2	Arfgef2	1 hr	0.318705	0.242044	1.29185	0.478088	0.841955	1.18531	0.506995	0.470584	0.729714	0.883018	1.0013	0.620087	0.916657	0.803288	0.855953	1.6887	0.201515	0.886265	0.458328	0.152888	0.327219	0.422393
ARFRP1	Arfrp1	1 hr	2.16157	1.88728	1.02401	1.27221	1.26198	1.31924	2.44248	0	1.03408	1.2601	0.929122	1.37233	0.753736	1.0969	1.03072	0.669478	1.57799	0.859916	2.86115	1.78348	0.272732	1.11285
ARG2	Arg2	1 hr	0.944063	0.0186717	0.0815564	2.4673	0.247223	0.465206	0.361191	0	0.140302	0.228992	0.235509	0.672268	0.262812	0.178878	0	0.307554	0.0277433	0.669273	0.0155891	0.0994353	0.0626205	0.649721
ARGLU1	Arglu1	1 hr	0.198757	6.20951	2.8757	4.59634	1.12623	1.32477	1.43916	1.28715	0.424941	1.60742	1.03119	2.04718	0.892148	3.03346	0.859152	3.80929	2.01067	0.507193	4.7724	4.7724	0.617198	4.17054
ARHGAP1	Arhgap1	1 hr	0.813776	0.483428	1.78111	2.65029	1.40068	1.14772	1.05615	3.58339	0.475701	1.77409	1.22907	1.24286	0.887133	1.44765	5.58615	0.447561	2.27688	0.678212	0.89363	0.892708	1.35515	0.936564
ARHGAP15	Arhgap15	1 hr	0	0.0686809	0	3.48404	0.648497	0.583087	0	0	0.907335	0.805482	1.10964	1.90671	4.33624	2.9145	3.17754	8.10575	4.20262	0.563931	1.22691	0	0.158387	0
ARHGAP20	Arhgap20	1 hr	4.15858	2.61821	0.866892	2.04785	0.0595763	0.0719412	0.307324	0	0.162542	0.150327	0.102516	0	0.400398	0.0427901	1.04105	1.1324	0.180977	0.139086	0.0876784	0.517228	0.0747889	0.174757
ARHGAP24	Arhgap24	1 hr	0.272289	0.192988	0.111828	0.177197	0.591265	1.04594	0.470306	0.926715	0.233944	0.502553	0.800516	0.652201	0.525634	0.480015	0.14418	0.167699	0.178372	0.838441	0.715975	0.29006	0.273849	0.019821
ARHGAP30	Arhgap30	1 hr	7.72521	6.98805	8.97459	5.35427	0.561177	1.68512	0.399612	0	0.476623	3.41814	1.35511	1.36344	5.1546	6.95245	0.658963	14.5207	2.46423	0.630381	8.19482	5.49929	6.06047	5.41567
ARHGAP31	Arhgap31	1 hr	0.337904	0.964065	1.79189	0.632977	0.602128	0.341204	0.380124	0	0.514029	0.81269	0.854265	0.305082	1.32328	0.966146	0.441929	0.732878	0.641873	0.123898	0.155285	0.463631	0.974289	0.0836509
ARHGAP35	Arhgap35	1 hr	1.06795	0.492012	0.413082	0.391151	1.51497	1.27899	0.610361	0.240104	1.04314	1.00665	0.878172	0.921954	0.754015	1.00019	1.56808	1.91516	0.395578	0.738285	0.655195	0.704267	1.14432	0.387509
ARHGAP42	Arhgap42	1 hr	0.390023	0.315822	0.173333	0	1.59833	0.248322	0.515465	0	0.810594	0.940471	1.03674	0.402144	0.615583	0.552122	0.513692	0.312275	0.0553798	0.843113	0.031533	0.225756	1.39011	0.969836
ARHGAP5	Arhgap5	1 hr	0.470888	0.230982	0.179534	0.467769	1.0091	0.980607	0.578658	0.484406	0.985387	1.23225	1.43079	0.500842	0.919009	0.869376	0.317273	0.269254	1.06618	0.990323	0.874855	0.896334	1.3136	0.81962
ARHGAP9	Arhgap9	1 hr	6.26961	10.1468	2.04313	2.71248	0.531148	1.46759	0.61034	0	0.353594	1.45498	1.01589	2.83102	1.71677	9.31702	1.25599	0	4.86507	0.564691	15.1834	2.12535	0.568726	5.05473
ARHGDIA	Arhgdia	1 hr	0	1.80618	0.377652	1.52502	0.726173	0.927589	1.82362	1.9707	0.364483	1.24394	0.939895	1.3756	1.3821	1.41293	1.05119	0.310445	1.92547	0.841196	1.755	1.60458	2.57352	2.00237
ARHGDIB	Arhgdib	1 hr	0.445708	0.311105	0.478171	0.292894	0.220446	0.819495	0.123848	1.13179	0.718741	0.856049	0.682451	0.920448	3.8833	1.20793	0	1.50221	4.04337	3.89973	0.898344	1.99166	1.97398	1.06911
ARHGEF1	Arhgef1	1 hr	1.4475	2.04122	0.715901	1.37811	0.727513	1.1583	2.89568	0.984776	0.247078	1.34514	0.883122	2.30039	1.43424	3.72772	0.520386	1.12482	1.46425	0.907553	2.55634	2.17901	1.70858	2.18397
ARHGEF12	Arhgef12	1 hr	0.00414404	0.241411	0.496786	0.381482	1.12799	1.10954	0.461337	0.250198	0.577425	1.05367	1.25614	0.490953	1.08666	0.779347	0.726525	0.379647	0.721099	0.503051	0.35547	0.318769	0.64328	0.106445
ARHGEF16	Arhgef16	1 hr	1.8974	0.443942	1.27003	0.168539	1.09349	1.21494	0.749827	0.845957	0.0449517	0.528271	0.634364	0.345618	0.574112	0.681213	0	0.207086	0.0186804	0.703867	0.360859	1.16151	0.234188	0.291178
ARHGEF18	Arhgef18	1 hr	0.613957	2.88289	1.5764	1.58948	0.841549	1.335	0.919827	5.7904	0.328412	1.04634	0.871633	2.26054	0.944372	2.16236	1.4492	4.36792	0.915822	0.54599	1.23068	1.33342	0.953321	1.78192
ARHGEF19	Arhgef19	1 hr	7.37401	1.1532	1.03014	0	0.226322	1.13845	1.47559	0	0.186023	1.91636	0.810299	0.329229	1.66162	1.77028	0	3.60317	6.1895	3.27286	4.52141	0.824331	0.639747	0.839084
ARHGEF28	Arhgef28	1 hr	1.5582	0.903061	0.338679	0.236475	1.64734	1.27606	1.07775	0.481959	0.0636148	0.632416	1.36934	0.526381	0.815613	0.81158	0.641996	0.19634	0.222879	0.215349	0.403319	0.401336	0.584415	0.735208
ARHGEF39	Arhgef39	1 hr	13.9415	0.826531	1.54694	0.122449	0	0.684354	0.493878	0	0.407483	0.39932	0.742857	0	0.340136	0.319048	0	0	0.517687	4.20272	0.217687	0.768027	5.39592	0
ARID1A	Arid1a	1 hr	1.58024	0.624663	0.737541	0.660801	0.559984	0.729765	0.695808	0.47151	0.538902	0.803905	0.852228	0.562719	0.653872	0.874768	0.412618	0.228684	0.613032	0.694893	0.587067	0.727662	0.720202	0.948276
ARL1	Arl1	1 hr	0.0668554	0.215171	0.166586	0.397758	1.20957	1.14521	0.791966	0	1.73103	0.960356	0.918695	0.976124	0.956109	0.38199	0.616711	0.115324	0.81076	0.468512	0.318916	0.621599	1.05153	0.429236
ARL13B	Arl13b	1 hr	0.331278	0.155412	0	1.25017	0.994169	1.26744	1.23894	0	0.676471	1.60425	1.31874	0.397165	1.41782	0.502953	0.700445	5.82067	0.214258	3.14295	1.02016	0.11987	1.09459	0
ARL2	Arl2	1 hr	0	0	0.0555396	3.47863	0.251039	0.581314	0.486897	6.95022	2.79623	0.441354	0.647591	0.877155	2.68071	1.40441	0	0	0.0240671	1.12856	0.300284	0.0807175	0	0
ARL4A	Arl4a	1 hr	3.81802	1.43866	0	0.0700268	0.703769	0.526757	1.38614	0	0.473459	1.25737	1.46628	0	0.83682	1.47562	0	0	0.49719	0.35597	0.0688597	0	3.67057	0
ARL4D	Arl4d	1 hr	0	0.026231	0.125291	2.6984	1.13842	1.24674	0.224043	0	0.209848	1.27699	0.225586	0	1.12238	0.321252	0.733233	0	0.130229	0.466911	0.496537	2.12995	0.695892	1.90499
ARL5B	Arl5b	1 hr	0	0.0235878	0.36242	0.0815861	1.83596	0.734552	0.201468	2.08849	1.64809	1.02898	1.70387	0.253916	4.85715	0.252806	0	0	0.560835	0.187593	0	0.112389	0.0613283	0
ARL6IP4	Arl6ip4	1 hr	0.464983	4.01254	1.44299	2.10567	1.22389	1.5826	2.2462	2.1412	2.57421	1.46087	1.16135	2.36417	1.28899	2.07525	1.7105	0.471367	3.42806	0.462181	3.08272	3.92525	4.80377	2.87402
ARL6IP5	Arl6ip5	1 hr	0.0670849	0.0911843	0	0.0177057	1.14635	0.974207	0.514547	2.72323	3.80761	0.749934	0.770296	0.401427	2.47103	0.597764	1.78887	4.17343	0.0748557	1.78719	0.485825	0.599534	0.451397	1.45669
ARL8A	Arl8a	1 hr	0	1.46026	0.379652	0.115633	0.886872	1.26971	1.47816	5.66548	1.33813	1.13405	0.903846	0.121335	1.15805	1.34993	2.43399	4.36554	1.84774	1.90516	0.277015	0.699764	3.72412	2.82903
ARMC1	Armc1	1 hr	0.331772	0.0246815	0.0251852	0	1.07356	0.996996	0	1.47686	2.39225	0.888532	1.19042	0.397758	0.738261	0.47516	1.80527	1.07709	2.44111	0.57993	0.829263	0	0.878962	1.23861
ARMC10	Armc10	1 hr	0	1.49365	1.11355	1.48786	0.519964	1.13889	0.262376	1.50163	1.2628	1.16303	1.62274	0.637285	0	0.891879	3.89793	0	0.151839	0.865143	3.25506	1.6814	2.63553	0.225663
ARMC8	Armc8	1 hr	0.360651	0.460841	1.77959	1.0427	1.18823	0.861204	0.329132	0.568598	1.56447	0.905354	1.45933	1.49335	0.934882	0.437344	0.26854	0.503512	0.339202	0.545841	0.599662	0.212727	0.626915	0.206525
ARNT2	Arnt2	1 hr	0	1.24984	0.36017	0.864697	0.618895	2.19609	0.194709	0.546161	0.154858	0.702938	1.37505	0.659217	0.680152	0.556494	0.209889	0.540944	0.77372	0.130793	1.58581	0.991855	0.852782	0.289287
ARPC1A	Arpc1a	1 hr	0	0.497833	0	1.19268	1.4629	1.15075	1.33209	0.830761	1.26503	1.20997	0.884973	0.55044	0.512472	0.726018	0.988299	0.268231	0.622315	1.61109	0.197301	0.729324	0.0469404	0.220252
ARPC1B	Arpc1b	1 hr	0	0.531674	1.56842	0.0722712	0.674227	1.75912	1.29964	2.07763	0.326132	1.36793	1.58358	0.338232	3.366	2.07838	0.238362	3.07194	3.92875	1.50584	0.958919	2.18745	1.63215	0.815703
ARPC2	Arpc2	1 hr	1.23272	0.771724	0.657793	0.252292	0.79452	1.36976	0.980197	1.05076	1.76754	1.24298	1.26373	0.185314	2.01529	1.11107	3.07005	1.6102	1.45654	1.05667	0.716598	0.92339	0.565341	0.672461
ARPC3	Arpc3	1 hr	0.0256808	0.0859291	0.182025	0.690106	0.478258	1.40966	0.174758	2.07657	0.608809	0.776111	1.29673	0.186619	1.76738	0.75107	0.0894687	0.241558	1.92712	2.08003	0.0988825	0.708821	0.5884	0.277782
ARPC4	Arpc4	1 hr	0	0.0181549	0.0185254	0.0222305	1.39657	0.895517	0.646042	0	0.671236	1.12573	1.21922	1.84006	1.94689	1.04582	3.20403	0	0.0389033	0.149068	0.100161	3.18427	0.487711	0.448314
ARPC5	Arpc5	1 hr	0.16877	0.273739	0.0790897	1.3283	0.576176	1.13331	1.20462	0	0.464204	1.56668	1.16875	1.0338	2.48928	1.02219	0.356843	0.464716	1.02697	0.897831	2.55419	1.60776	2.31982	0.527236
ARPIN	Arpin	1 hr	1.28033	4.91245	1.68633	0.775959	1.61925	1.24479	1.70348	6.32482	1.83765	2.76579	1.5603	4.79668	2.15454	1.5364	3.87204	1.51662	1.50486	0.189359	2.11374	5.11582	2.06843	3.24038
ARPP19	Arpp19	1 hr	0.235155	0.465058	0.134881	1.48832	0.75718	0.776092	0.365998	0.363503	1.6059	1.03696	0.813194	0.162724	1.04947	0.460625	0.404512	0.254002	0.237027	0.843532	0.29048	0.122765	1.29582	0.161214
ARRB2	Arrb2	1 hr	1.76597	0.299589	1.99751	0.284548	0.823808	1.49622	2.8763	6.00781	1.16433	2.52	1.55268	8.19838	2.92315	5.14332	0	0	1.62468	3.80934	3.89121	3.18699	0.246082	3.99526
ARRDC1	Arrdc1	1 hr	1.11982	0.555139	0.981545	0.17706	0.739306	1.83436	6.95264	0	0.826415	1.46582	1.39617	2.27924	0.960022	2.55782	2.35559	0	0.767124	1.0587	0.237569	1.0715	3.17286	2.25122
ARRDC2	Arrdc2	1 hr	0.304939	0.154177	1.64197	1.37581	0.29373	0.234128	0.957389	3.19221	0.997269	1.14755	0.382629	1.50661	0.275643	0.697573	0.37421	0.501112	0.827505	0.146625	0.812449	1.3594	0.67862	2.05154
ARRDC3	Arrdc3	1 hr	0	0.0740974	0.0158752	0.196642	0.910245	1.36949	0.414359	0	0.701208	1.07412	3.88153	0.159573	1.2498	0.75638	0.559308	2.15993	0.12884	0.886666	0.368649	0.329509	0.582574	0.384837
ARRDC4	Arrdc4	1 hr	1.50032	0.752019	1.03345	1.05743	0.766881	1.73899	1.69624	2.75555	0.574486	2.13252	2.49208	1.03475	1.67858	0.561553	0.15659	0.298124	1.54785	0.550309	1.11707	1.7817	1.48961	0.71462
ASAH2	Asah2	1 hr	1.51268	0.724235	0.0986029	0	0.169689	0.0435687	0	0	0.172746	0.0710858	0.136057	2.22736	0	0.114655	0	0	0.214786	0.121534	0	0	2.24035	0
ASAP1	Asap1	1 hr	0.13003	0.558326	0.380036	0.110975	1.03669	0.656127	0.790362	2.22259	0.508193	1.61804	1.45858	1.12266	1.77091	1.52642	0.281085	0.822984	0.801696	0.72768	0.686976	0.618413	0.761682	0.364234
ASAP3	Asap3	1 hr	0.0765813	1.08513	0.539935	1.46051	0.573993	1.23443	0.809269	0.501611	1.41825	1.0854	0.58559	0.868321	0.601453	1.40712	3.17996	1.12119	0.883851	0.791073	0.808202	0.460021	1.20451	0.57286
ASB6	Asb6	1 hr	0.176201	3.59584	0.995562	0.214573	1.28173	1.16091	0.826745	2.98389	0.688805	0.984375	1.11012	0.456556	0.68668	1.20163	1.79591	0	1.28229	1.85072	2.33939	0.681869	0.967594	0.690595
ASB9	Asb9	1 hr	0	0.0425284	0	0	1.32288	0.48032	1.21081	0	0.379253	0.209139	0.238659	0	0	0.189626	0	0	0.0845564	0.159106	0.088559	0	2.93296	0
ASCC1	Ascc1	1 hr	8.13264	0.112934	0.883987	2.00018	1.72537	1.33224	0.114993	1.39322	1.84796	1.46861	1.49586	1.91718	1.49633	0.631668	2.77582	0	0.0102955	1.20362	0.868147	0	1.74532	0.574963
ASCC3	Ascc3	1 hr	0.60512	0.805548	0.395365	0.203052	0.770461	1.16037	0.803569	0.35515	0.713207	1.11741	1.87814	1.0598	1.08435	1.00581	1.59095	1.67953	1.76622	0.229136	1.49041	0.46029	0.502685	0.347034
ASF1A	Asf1a	1 hr	0	0.0245578	0.0745401	0	0.574075	0.831209	1.84068	0	2.10273	0.636191	0.466309	0.119611	0.401014	0.0866746	4.63796	0	0	0.13839	0.051138	0.117011	0.205419	0.67375
ASNSD1	Asnsd1	1 hr	0.0895849	0.0706696	0.0197034	0.373314	1.08395	0.993053	0.0953646	0	2.83283	1.04796	1.31593	0.536065	1.80654	0.715628	1.29097	0.416268	0.94826	0.120191	0.417056	0	1.04192	3.40094
ASPA	Aspa	1 hr	1.03131	0.0186394	0	0.0644705	5.61267	0.296915	1.14709	0	1.33371	0.415988	0.178719	0.519492	0	0.412261	0	0	0.0690756	2.30515	0.070172	0.663345	0.298231	0.796014
ASPDH	Aspdh	1 hr	1.3084	1.73037	0.0618727	0	1.97085	0.0684724	0.542417	0	0.213255	0.0833219	0.0107246	0.977176	0	0.156332	0	0	0.527155	1.78853	0.131995	0.465695	0.41166	6.68349
ASPG	Aspg	1 hr	2.74983	0.0471454	0.767342	0.101275	1.54088	0.124451	0.650987	1.75739	0	0.324938	0.0450818	1.92137	0.282713	0.935923	0.959416	6.60305	0.320811	0.75623	0.687179	3.10905	0.930525	1.36436
ASPRV1	Asprv1	1 hr	6.65648	0.701231	8.31702	0	1.80912	0.280232	1.71398	0	0.98798	1.07531	0.198117	12.2689	0	0.299783	8.65069	0	2.13106	0.238523	0.230702	0.527878	0.647791	16.0253
ASRGL1	Asrgl1	1 hr	0.687182	0.824008	1.08861	1.21709	2.19522	1.64059	1.2352	0	0.187487	0.47884	0.893795	0.957579	0.951068	0.79705	0	0.255036	0.0320448	0.484639	0.733266	1.46114	0.339166	0.369278
ASS1	Ass1	1 hr	0.189453	0.113133	0.15264	0.145885	1.73364	0.173357	0.697733	0.134996	0.112486	0.0776004	0.0612731	0.716133	0.0547861	0.097476	0.181283	0.379223	0.578016	0.207999	0.0455067	0.139008	0.490977	0.165882
ASTN1	Astn1	1 hr	4.45893	0.792174	0.732813	1.76442	0	0.00971777	0	0	0.0212503	0.0217772	0.0639265	0.446842	0.150977	0.0175622	0	0	1.30306	0.253833	0.122292	0.023709	1.35727	0.576158
ASXL1	Asxl1	1 hr	0.922908	1.02934	0.564078	1.07186	1.42161	1.26164	1.49723	0.811606	0.556843	1.24145	1.35972	0.507044	1.2881	1.80694	1.56079	0.82097	1.23802	0.494606	1.38332	1.20536	0.294394	1.29862
ASXL2	Asxl2	1 hr	0.290394	0.496512	0.421716	0.25038	0.627227	0.661193	0.471964	0	0.870534	0.636875	0.815012	0.331685	0.711148	0.798626	0.939888	0.603139	1.0957	1.20197	0.696289	0.527234	0.197454	0.179874
ATAD3A	Atad3a	1 hr	2.4315	0.525101	3.34784	1.0463	0.405492	0.84818	1.29911	0	1.22405	0.617537	0.402151	1.14754	0.287219	1.29599	0.899298	1.95997	3.03089	1.78189	1.28853	1.84326	0.05535	0.404267
ATF3	Atf3	1 hr	0.0415201	1.12652	0.820296	0.811408	0.279013	0.296303	0.216915	0	0.412461	0.221359	0.656833	0	0.336483	0.419219	1.8835	0	0.619636	0.112993	0.193294	0.420193	1.4115	0.0688552
ATF4	Atf4	1 hr	0.0162913	1.00815	1.37669	0.629246	1.83308	1.50781	1.32213	1.68816	2.65047	2.23676	1.77067	1.79701	1.28766	1.74563	1.89426	2.88913	2.45199	1.45542	1.32796	1.25317	3.46766	1.16347
ATG4B	Atg4b	1 hr	0.0428847	0.296483	0.258314	0.429853	1.63025	1.66056	1.55058	0.553099	0.470285	1.29924	1.05225	0.936861	0.891587	1.30063	2.1936	1.58988	0.151857	0.356848	0.856122	0.903157	0.111802	1.18034
ATG7	Atg7	1 hr	1.17499	1.5656	1.20374	0.534271	1.45088	0.947667	1.30885	1.0646	1.07431	1.03729	1.49665	0.733997	1.67657	1.11903	0.428013	3.7223	0.573312	1.28365	0.527059	0.0687551	0.563696	1.42405
ATIC	Atic	1 hr	0	0.788509	0.257366	0.628815	1.37318	1.62512	0.78002	0	1.56049	0.890255	0.907345	0.962576	1.24767	0.522994	0.26891	1.84683	0.488701	0.699212	0.939148	0.511676	1.49496	1.67605
ATMIN	Atmin	1 hr	1.14225	0.797985	0.0995385	0.0341449	0.877326	1.07518	0.184443	0	1.57806	0.76765	0.886929	0.243435	0.623907	0.693568	0.864369	0.555845	0.965584	0.296176	0.463776	1.71799	0.209747	0.0862006
ATOX1	Atox1	1 hr	0	0.0272698	0.0481232	0	0.361566	0.400385	1.48893	0	0.74238	0.423163	0.551171	0	0	0.419955	0	3.00192	0.64838	0	0.842477	0.069939	0.723452	0.362849
ATP10B	Atp10b	1 hr	0.20002	0.787548	0.28204	1.68026	0	0.00838892	0	2.00778	0	0.0195068	0.0691328	0.250455	0.119163	0.275318	0	0.274965	1.30892	0.00924803	0.0409844	0.266677	0.264554	0.311957
ATP11A	Atp11a	1 hr	0.6003	0.642621	0.796051	0.592309	1.69054	1.09795	1.03408	0.265955	0.458617	0.853999	1.28706	0.93585	1.47584	1.1788	0.299916	0.341982	0.564681	0.31383	0.591346	0.529728	0.831401	0.192747
ATP13A1	Atp13a1	1 hr	0.420384	0.938257	2.34924	2.50608	1.10977	1.20853	1.35822	0.624533	0.274738	0.852619	0.748499	0.569228	0.845612	1.25805	0.427767	2.02244	0.509314	1.12585	1.10864	1.21253	1.09035	0.761996
ATP13A2	Atp13a2	1 hr	0.222144	0.515017	3.69873	0.907844	0.531154	0.908887	1.13232	0.604212	0.527702	0.935381	0.607343	2.98774	0.838399	0.744146	1.60133	0.159122	0.869468	0.952883	1.13657	1.57243	3.98013	0.790148
ATP1A1	Atp1a1	1 hr	0.0409148	0.0954575	0.106229	0.215834	0.51616	1.27763	0.157072	0.163498	0.0239534	0.369291	0.676506	0.138991	0.365778	0.164666	0.0331059	0.100116	0.0348516	0.219579	0.20502	0.136218	0.217127	0.130255
ATP1A2	Atp1a2	1 hr	4.65446	2.07741	3.79433	2.30354	0.281453	0.128167	1.82656	0.559101	14.6174	0.367438	0.13958	1.86007	0	0.553339	0.738457	0.984553	1.11776	1.40447	0.276306	0.511997	0.256726	1.56284
ATP1B1	Atp1b1	1 hr	0.00639732	0.132631	0.140553	0.0526646	1.53485	1.28305	0.349683	0.10452	0.268901	0.360717	0.439932	0.335293	0.281294	0.233913	0.0463093	0.0885589	0.0350622	0.868197	0.229242	0.0854476	0.30656	0.13807
ATP2A2	Atp2a2	1 hr	0.342773	1.1612	0.54392	1.92677	1.22684	1.04123	2.93596	3.28767	8.38623	1.15142	0.965369	1.1013	0.954699	1.42681	1.96679	1.20016	0.999408	0.494983	1.1947	1.10225	1.13029	1.6796
ATP2B1	Atp2b1	1 hr	2.14294	0.496699	0.49457	0.394767	1.15828	0.682171	0.53869	0.894329	0.872709	1.04244	0.953608	0.546875	1.35407	0.847383	0.980183	1.37561	0.138673	0.567063	1.15457	1.12803	0.546875	1.11342
ATP6AP2	Atp6ap2	1 hr	0.0791431	0.0270343	0.175371	0.0320592	0.722639	1.2791	0.151754	2.01842	0.305618	0.889116	0.665505	0.427373	1.50714	0.401695	0.981676	3.10206	0.216978	1.38392	0.390188	0.0203511	0.138287	0
ATP6V0A1	Atp6v0a1	1 hr	0.764056	1.04988	0.863613	0.0315687	2.13968	0.723038	1.85397	1.54672	1.2125	0.630287	0.74523	0.373031	0.637962	0.715363	1.50722	0.447066	0.573558	0.579241	0.281113	1.02305	0.59832	1.51388
ATP6V0A4	Atp6v0a4	1 hr	0.27465	0.658737	0.0824786	0.690405	0.822637	1.29543	0.671227	0.333924	0.00619358	0.84939	0.294715	0.238018	0.456004	0.324455	0	0.487979	0.0562199	0.51968	1.02718	0.407428	0.49535	0.276459
ATP6V0C	Atp6v0c	1 hr	0.0698359	0.0087738	0.1031	0.317718	0.895075	0.851384	0.756467	0.90958	0.934572	0.767161	0.580843	0.468202	0.940983	0.387554	0.466902	0.247853	0.338604	0.880364	0.326285	0.470831	1.59651	0.0334113
ATP6V0E1	Atp6v0e	1 hr	0	0.425704	0.258492	0	1.15522	0.980879	0.522311	0	0.766808	0.690606	1.07108	0.368462	0.883279	0.388415	0.351307	0.178949	0.538292	2.53996	0.286662	0.408188	0.0119179	0.327742
ATP6V1A	Atp6v1a	1 hr	0.0784946	0.493709	0.0153921	0.169164	1.07069	1.1593	0.57161	2.34754	0.252608	0.795809	0.87126	0.14422	0.970417	0.522439	0.340333	0.667897	0.328158	0.809271	0.54429	0.111877	0.931145	0.152758
ATP6V1E1	Atp6v1e1	1 hr	0	0.0140264	0.301355	0.0706043	1.11834	1.13444	0.16827	0	1.44897	0.75634	0.657636	0.111881	0.895896	0.257293	0.210207	1.18308	1.08565	0.913937	0.366718	0.0793413	0.737969	0.110133
ATP6V1F	Atp6v1f	1 hr	0.258116	0.0864739	0.0378731	0	1.08162	1.23778	0.175093	0	1.40868	0.598787	0.400653	0.0853545	0.998787	0.936474	0.268284	0.184888	0.093097	1.90103	0.511287	0.213713	0.311007	0.105504
ATP7A	Atp7a	1 hr	0	1.03954	0.356345	0.0954553	0.579755	0.752852	0.471849	0.776093	0.651778	0.748957	0.774944	0.15126	0.534614	0.666655	0	0.549682	0.846711	2.48535	0.102734	0.0139192	0.416875	0.231774
ATP8A2	Atp8a2	1 hr	1.02769	1.23382	0.853194	0.655403	0.220225	0	0	0.843319	0.0854248	0.0846578	0.0457325	1.0762	0.237004	0.0363367	0	0.998732	0.862398	0.820309	0.525492	0.21965	2.51998	0.470747
ATP8B4	Atp8b4	1 hr	0.323609	1.16752	3.20352	0.793282	1.45003	0.172737	0.524833	1.0044	0.0978902	0.283147	0.645495	1.52197	2.89978	0.652299	2.13063	1.39541	1.09085	0.240416	0.497253	0.898521	1.06754	0
ATP9B	Atp9b	1 hr	1.71241	0.945878	0.0495605	0.152107	1.03392	0.922383	0.895997	0	0.617045	0.95669	0.883366	0.996991	0.230676	0.803191	0.3914	0.768295	0.511233	0.941757	0.444118	0.811326	1.19737	0
ATPAF2	Atpaf2	1 hr	2.74385	0.125966	0	0	0.725825	0.811988	0.834231	0	2.65441	0.900726	0.637087	0	0.324982	0.54952	0	2.07211	0.0737532	0.620464	1.81808	0.0948256	0	0.264809
ATXN1	Atxn1	1 hr	0.138432	1.04652	0.339318	0.361274	0.456309	0.487969	0.652126	0.300095	1.365	0.777167	0.735857	0.304269	0.933463	1.0111	1.07845	0.89237	0.797904	0.746537	0.596205	0.389329	0.358048	1.05059
ATXN10	Atxn10	1 hr	0.966594	0.106509	0.444497	0.0444427	1.18115	1.20991	0.880774	0	1.53397	1.09846	1.78293	0.655704	1.4423	0.669636	0.573088	0.952454	0.229528	2.35978	0.423878	0.0282121	0.157082	0.0787848
ATXN2	Atxn2	1 hr	1.14687	0.191448	0.104155	0.0260238	1.73291	1.11971	0.861919	0.330401	1.08276	1.34661	1.30799	0.472995	1.46784	1.09706	0.471682	1.37956	0.619587	0.942886	0.673038	0.995799	0.258119	0.806649
ATXN2L	Atxn2l	1 hr	0.83403	1.05952	0.784774	0.391425	0.980041	0.983049	1.34685	1.06729	0.464021	1.00372	0.953188	0.947605	0.896617	1.40482	1.38971	0.212953	0.825897	1.2242	0.756886	1.15365	0.397681	0.96096
ATXN7L3	Atxn7l3	1 hr	0.353476	1.49951	2.35092	0.112364	0.849906	1.37369	1.10304	0	0.894776	1.34573	1.01413	1.32567	1.46674	1.47336	2.16813	1.13574	1.13995	0.963021	2.24765	3.15964	0.440586	1.50635
ATXN7L3B	Atxn7l3b	1 hr	0.102878	0.479227	0.465693	0.297493	1.2469	0.923683	0.661048	0	1.11142	0.747911	0.969595	0.648384	0.849266	0.712792	0.338531	0.453334	1.18436	0.933779	0.385009	0.0491325	1.26343	0.374043
AUH	Auh	1 hr	0	0.586436	0.0269556	0.673976	1.33777	0.871593	0.505525	0.326154	1.13404	0.893218	1.03207	0.330791	0.472503	1.07957	0.425915	0.286977	0.163727	2.74839	0.775125	0.744962	0.144485	1.36594
AUP1	Aup1	1 hr	0	0.551556	0.355287	1.46669	0.815641	0.773937	1.16853	0.41904	0.846932	0.755452	0.741031	0.324497	0.548716	0.631232	0.499496	0.624161	0.240422	0.585297	0.814917	0.469206	0.0188752	0.547992
AURKAIP1	Aurkaip1	1 hr	0.704729	1.37439	0.674556	1.35965	1.02602	1.2289	0.937641	0.688471	2.57305	0.763491	0.668287	1.41104	0.340102	1.47717	1.64864	0	0.576183	0.756326	1.85654	1.18419	0.27204	0.338242
AUTS2	Auts2	1 hr	0.998091	0.675515	0.0931174	1.76939	0.953613	0.570524	0.8443	0.963459	1.01599	0.643311	0.94078	0.755372	0.875277	0.584052	0.924584	0.42882	1.19625	1.29954	1.00545	1.04286	0.596912	1.63308
AVEN	Aven	1 hr	0.284719	6.55504	2.61869	10.457	1.31079	2.22135	6.18987	0	2.44966	1.74447	1.11447	6.01055	2.77922	3.33419	3.85789	0.796851	4.68222	0.335516	4.07681	10.8141	7.27885	14.3805
AVPI1	Avpi1	1 hr	1.56239	0.0418673	0	1.91555	0.469407	1.36044	0	0	0.690565	0.686132	0.19456	0.203919	0	0	2.78295	0	0.629488	0.332968	5.19155	0.107377	0	7.29428
AVPR2	Avpr2	1 hr	62.5654	0	1.49752	0	0	1.15352	5.99809	0	2.11326	0.286661	0.158237	1.8438	0.487323	0.263728	0	0	0	0	0.366926	0	0	0
AZGP1	Azgp1	1 hr	0.170283	0.0219565	0	0.677912	3.52951	0.00891142	0.220155	2.06299	0.0442887	0.030331	0.0201312	0.699386	0.132705	0.116815	0	0	0.153695	0	0	0	0.00708619	0
AZI2	Azi2	1 hr	0.558487	0.477474	0.0629881	0.393827	0.38603	1.47779	0.245066	0	1.24356	1.14087	1.26989	1.13672	1.4465	0.793427	0.849326	0.200711	1.16072	1.25136	0.674033	0.534386	0.399903	0.114533
AZIN1	Azin1	1 hr	0	0.46077	0.337089	0.406721	1.05169	1.11732	1.16774	0	1.66526	0.958706	1.35989	0.693016	3.01087	0.639013	0.876515	0.521425	0.616826	1.49027	0.438537	0.460677	0.155079	0.63278
B2M	B2m	1 hr	0.0820362	0.217371	0.0365284	0.129359	0.117585	1.60677	0.0388736	0	0.747514	1.41113	2.12571	0.00665028	0.503092	0.91443	0.264389	0.255072	1.61722	0.024304	0.812379	0.761682	0.706504	0.0991599
B3GALT4	B3galt4	1 hr	1.53144	1.48671	0	3.78144	0	2.06331	0	0	1.18334	2.05553	0.886776	0	0	3.8777	0	0	0.739952	0	0.507563	0.695225	0.214888	0
B3GAT3	B3gat3	1 hr	3.92461	3.62862	0.318416	2.62218	1.28659	1.37606	2.58365	0	0.633662	1.60134	1.38289	0.392046	1.17809	1.52089	2.82844	0	1.17882	0.116785	1.20418	5.98188	0.173349	0.88503
B3GNT7	B3gnt7	1 hr	0.816954	0	1.25067	0	1.20446	0.715279	0.516195	0	0	0.708169	0.759362	2.27097	1.05799	0.564544	0	0	0.0817665	6.08343	0.125849	3.75201	7.27722	9.67262
B4GALNT1	B4galnt1	1 hr	0.260283	1.22318	0.0984649	0.170978	0.169451	0.104953	0	0	1.05831	0.249979	0.198456	2.22424	0.271733	0	1.09762	0	0.771309	0	0.19922	1.42698	4.20537	0
B4GALT1	B4galt1	1 hr	0	1.32736	0.0628756	0.606522	0.632723	1.25851	0.639336	0.395734	0.385904	1.23367	1.57804	0.0147985	0.608274	0.541681	0.33057	1.22899	0.925833	1.32432	0.217509	0.217866	1.1402	0.0833575
B4GALT5	B4galt5	1 hr	0.080359	0.605665	0.748409	0.707145	1.41492	0.842686	1.72461	3.22415	2.1862	1.18363	1.11097	0.846532	0.605875	0.937802	0.721693	1.21336	0.927451	1.4629	1.35554	2.18851	2.6901	1.81077
B4GAT1	B4gat1	1 hr	0	0	0.0652162	0	1.56904	0.533456	0.21123	1.60535	1.33886	0.593693	0.400775	0	0.10425	0.186653	2.71852	0.832712	0.0271467	1.54109	0.97744	0	0.535544	0
BABAM1	Babam1	1 hr	0.120683	0.00892784	1.52151	0.845834	1.20337	1.22164	0.669168	0	2.59002	0.94131	0.755926	0.428641	1.19192	1.54147	0.817055	0	0.253656	2.69841	0.575688	0.39272	0.0232124	1.42887
BAD	Bad	1 hr	0.691553	0.202103	2.72915	0.0392432	1.01357	1.01117	0.658414	4.26683	1.31312	0.787481	1.01335	5.96999	0	1.46552	1.35956	0	0.0686757	1.34692	0.350791	0.659504	1.00048	0
BAG1	Bag1	1 hr	0.0229905	2.59125	1.09943	0.964117	0.842928	1.59096	1.10064	0.732257	2.12783	0.985759	0.833017	1.22089	0.930643	1.69088	0.482193	0.460922	1.11659	2.55488	3.46472	1.53483	3.7817	2.59304
BAG3	Bag3	1 hr	1.95746	0.44632	1.72833	0.249574	1.49796	0.691513	0.611194	0.404189	3.73445	0.535255	0.468408	0.680086	0.359794	0.132308	0.429416	1.01191	0.60287	0.40083	0.263155	0.165056	0.454534	0.0851385
BAG6	Bag6	1 hr	0.333335	1.34972	0.5384	1.40278	0.017081	1.85173	0.190869	0	2.48019	1.40855	1.30788	0.0425861	0.0153124	1.70307	0	0	2.48019	0.0148004	1.14252	1.71843	1.57024	1.25799
BAK1	Bak1	1 hr	0	0.143301	0.0723744	0.925428	1.07741	1.55074	0.634482	0	1.77752	1.14834	1.32638	0.441484	1.79923	0.439554	3.37072	0	0.151986	0	0	0.344985	0.481531	4.14705
BANF1	Banf1	1 hr	0.270155	0.0199854	0.217723	2.813	0.881472	1.15421	0.710068	0	5.74897	0.936961	1.06134	0.215137	1.90214	0.852082	0.91486	0	0.384424	2.5814	0.075239	1.24074	2.03357	1.15445
BANK1	Bank1	1 hr	0.680227	0.138214	0.648126	0.027134	0.0840669	0.263345	0	0	0.0162319	0.12398	0.0756481	0.515122	0.187212	0.762961	0.342203	1.94414	0.843939	0.0290115	0.604155	0.830493	0.20193	0.37388
BAP1	Bap1	1 hr	0.993521	1.68674	0.80536	0.904916	1.3724	1.26269	1.57227	0.685541	1.25714	1.55792	1.13504	1.48734	1.1414	1.60592	1.19283	0.475838	1.11682	0.63946	2.02121	1.47563	1.83049	0.443106
BATF2	Batf2	1 hr	0.606281	0.0464516	1.22286	1.35849	0.732051	0.185149	0.159075	0	0.577578	0.146805	0.411929	0.200487	0.142203	0.760974	0.915447	0.434279	0.280024	0.851467	0.0387827	0.0477663	0.38958	1.07584
BATF3	Batf3	1 hr	0.720326	6.90359	0.389941	3.48314	0.460783	1.12093	5.32314	0	0.604974	2.33275	1.77292	3.10699	1.00495	7.20138	4.97019	0	0.801198	0.199359	4.868	1.05322	2.09014	1.46197
BAX	Bax	1 hr	1.41835	0.824261	1.05649	0.224261	3.29061	1.27638	5.94059	4.4114	0.643978	1.73056	1.37051	0.413545	1.24269	3.11162	3.90064	0	5.33931	0.888298	2.27527	4.25658	2.22435	2.85135
BBS4	Bbs4	1 hr	2.13711	0.659809	0.0142057	0.706215	0.700817	1.12633	0.80414	0	0.830562	0.923089	1.49037	0.386491	0.792964	0.714454	0.692577	0.417459	1.19982	1.83273	0.300688	0.067714	0.434601	0
BCAM	Bcam	1 hr	0.155775	0.456297	0.179831	0.368192	0.845799	3.07927	0.46606	0.445182	0.122107	1.03865	2.22226	0.667438	1.54187	0.797373	0.369468	0.121199	0.318253	1.31142	0.849648	0.764073	0.899522	0.431776
BCAP29	Bcap29	1 hr	0	0.0927856	0.349322	1.07649	1.01894	1.26176	0.523583	0.880412	2.44505	1.28869	1.33213	1.21152	1.11413	0.719664	0.418186	0.936564	0.0761702	0.760601	0.317793	1.5173	0.523983	0
BCAS3	Bcas3	1 hr	0.550159	0.0349452	0.578024	0.0116917	1.12	0.979828	0.623816	1.11415	0.907275	0.832123	1.25367	0.265077	0.94969	0.394724	0.186807	2.06482	0.543274	1.14293	0.504366	0.109122	1.17385	0.479164
BCAT2	Bcat2	1 hr	0.784868	0	0.863553	0	1.21071	1.50144	1.57642	4.01515	2.27147	1.07288	0.673274	0.226404	0.68911	1.18126	0.587909	0.702719	2.22569	0.298656	0.398125	0.566877	5.73681	2.43527
BCKDHA	Bckdha	1 hr	0	0.240584	0.165806	0.0568769	0.934659	1.09424	1.07799	0	2.37321	0.861659	0.567118	1.07977	0.547186	0.642658	0.76733	0	0.363479	1.6267	1.79733	0.773804	0.664621	3.28705
BCKDK	Bckdk	1 hr	2.31533	0.141491	0.204842	0.0209616	0.49388	1.17991	0.802598	0	2.21518	0.730863	0.776396	0.371953	0.622212	1.11947	1.71699	7.37361	0.0491434	3.05667	0.904262	0.614526	1.2832	1.00092
BCL10	Bcl10	1 hr	0.684194	0.262073	0.490497	0.0388256	0.682469	0.984014	0.521989	0	0.499125	0.665428	0.926423	0	1.41002	0.818143	0	0.683547	0.0910246	1.33258	0.347058	0.243523	0.293349	0.243954
BCL2	Bcl2	1 hr	0.192002	0.726512	0.0906231	0.348961	1.01649	1.2223	1.56488	0.989846	1.6419	1.09872	1.4168	0.469908	1.78464	1.00622	0.517995	1.02919	0.662812	1.98816	2.04103	0.535828	0.49808	2.2746
BCL2A1	Bcl2a1d	1 hr	0	0.23416	1.7135	0	0	0.878788	0	0	0	1.02479	3.5124	0	10.2727	0.446281	0	0	0.179063	0.504132	0	6.31129	0.363636	0
BCL2L1	Bcl2l1	1 hr	0	0.515598	0.0337083	0.435514	1.1756	1.17746	1.15191	0	0.278075	0.833898	0.88304	1.27957	1.34287	0.859707	0.955226	2.66415	0.651378	0.935204	0.705544	0.164574	0.657857	0.132139
BCL2L12	Bcl2l12	1 hr	0	5.41988	1.48205	2.87611	1.05861	0.613942	0.68072	0	1.34539	1.02289	0.552859	1.22633	0	0.897101	0	8.44714	0.290924	3.68831	1.64356	0.112849	1.42459	1.20718
BCL3	Bcl3	1 hr	2.31662	0.378874	1.00428	1.40117	0.805836	1.77312	1.3984	0	0.524521	1.3675	1.89631	2.7142	0.821772	2.05609	0.722411	0	1.0004	2.21726	2.47862	0.956471	2.98457	2.95644
BCL6	Bcl6	1 hr	1.31597	0.670991	0.511567	2.35133	0.829996	1.28928	1.14873	0.925066	3.4236	2.0692	1.65141	0.996558	1.52829	2.00648	0.842564	0.187861	0.0916903	3.68857	0.878898	2.01411	0.56567	1.58767
BCL6B	Bcl6b	1 hr	4.64367	0.178612	4.1667	0.112228	1.08996	0.281821	0.470203	0	1.47148	0.855986	1.31692	4.20252	2.342	2.51485	4.76767	0.496507	3.9688	2.01709	0.0443399	0.0546107	0.124502	0.283325
BCL7A	Bcl7a	1 hr	0.667818	1.35576	0.239567	3.17527	0.629891	1.30266	1.60028	1.05287	1.27717	0.969226	0.818996	0.169404	0.624729	0.502944	0	0.333856	0.881153	1.57183	0.932037	0.88779	0.483454	1.29529
BCL7C	Bcl7c	1 hr	0	0.976235	0.270406	8.78467	1.451	1.80505	2.72683	0	1.82431	1.60587	1.72907	2.32412	1.95599	2.22391	2.4908	0	2.37319	0.715147	4.01302	5.07994	3.4219	1.27811
BCL9	Bcl9	1 hr	1.41267	0.466339	0.0271758	0.756906	1.34975	0.890977	0.675445	1.08616	0.729127	1.12887	0.957444	0.3901	0.640505	0.758847	0.738231	0.233738	0.767214	0.260111	0.445522	0.516875	0.437021	0.742113
BCO2	Bco2	1 hr	2.31059	1.08442	0.994514	1.79893	0.577493	0.591894	0	3.14669	2.4941	0.376286	0.150391	0	0.32979	0.294198	1.11713	0.71842	0.0868194	0.980112	0.0658346	0.147099	0.81244	0
BCR	Bcr	1 hr	0.932296	0.397854	1.40207	0.822736	0.696692	1.06618	1.0472	0.382878	0.115296	0.583078	0.597205	0.569124	0.838953	0.994996	0.419634	1.87138	0.658962	0.640026	0.9732	0.77344	1.26079	1.03907
BDH1	Bdh1	1 hr	1.61278	0.208747	0.512072	0.100883	0	2.6349	0	0	2.4266	0.580079	0.561839	0	0	1.18065	0	0	0.644707	0	1.11219	1.89764	2.30478	0.817424
BDH2	Bdh2	1 hr	0.86402	0.331579	0.277477	0.0734375	1.75825	0.941516	0.561923	0	0.279545	0.424352	0.98953	0.463445	0.678244	0.494267	1.00473	0.145382	0.10962	0.0183402	0.20986	0.409037	0.598297	0.670739
BECN1	Becn1	1 hr	0.671638	0.590985	0.482668	0.185215	0.923445	1.35817	0.612348	0.416994	1.27777	0.998549	1.09735	0.354866	1.10511	0.47303	1.30335	0.94994	0.959161	0.379525	0.828939	1.20362	1.24827	0.836241
BEND5	Bend5	1 hr	0	0.145	0.447826	0	0.635215	0.807744	0.90488	0	0.709827	0.417793	0.390264	1.05927	0.466752	0.64898	0.449859	0	0.0264347	0.188797	0.0816504	0.262783	0.111213	0
BET1L	Bet1l	1 hr	1.75223	0.0497406	0	0.611602	2.03401	1.55606	1.16799	2.96315	0.812875	1.79565	1.41523	0.195557	0.659883	2.53677	2.23224	0.85994	1.2378	1.16677	2.67492	1.02485	1.05185	1.04528
BFAR	Bfar	1 hr	0	2.50379	0.543802	0.807812	0	2.46313	0	0	3.05978	1.92794	1.3564	0	0	1.87365	0	0	0.684655	0	2.8998	0.547868	1.71654	2.0554
BHLHE40	Bhlhe40	1 hr	0.0380342	0.0515649	0.233064	0.0714186	0.328841	0.866709	0.211891	0	0.939302	0.428142	0.612231	0.136836	0.344769	0.491065	0.506495	0.134986	0.00678951	0.336531	0.305062	0.220611	1.04095	0.302005
BHLHE41	Bhlhe41	1 hr	4.40694	2.13533	0.463708	0.394112	1.76309	1.30835	0.346661	0	18.5275	1.20633	0.91239	0.109139	3.36301	1.38216	0.758172	0.522496	0.148155	2.64543	2.04701	0.603954	0.594464	1.94473
BHMT2	Bhmt2	1 hr	0.0835802	0.293552	0.132404	0.34662	2.12688	0.684393	0.95639	0.123657	0.159638	0.288961	0.511813	0.908432	0.132479	0.555688	0.255108	0.237106	0.275413	0.575547	0.314771	0.326563	0.658991	0.13718
BIN2	Bin2	1 hr	5.89134	0.443839	5.54117	1.52519	0.362507	0.674038	1.11885	1.42795	0.097242	1.07875	0.865113	1.67276	2.86077	2.61125	0.385721	6.88779	0.392053	0.245621	1.79305	2.79063	0.021429	1.59776
BIN3	Bin3	1 hr	0	1.51651	0.631043	0.50768	1.71494	1.41051	1.04251	0	0.430138	1.13415	1.23572	0	1.02411	1.10543	2.07889	0	0.778295	1.37226	1.77734	0.488099	0.232105	0.640964
BLCAP	Blcap	1 hr	0	0.134533	0.0131982	0.206331	1.53407	1.284	1.33653	2.34681	4.10199	1.77674	1.17103	1.55193	0.876798	1.16821	2.60567	0.699238	0.14386	1.26412	0.971824	1.00306	0.198412	0.43202
BLOC1S1	Bloc1s1	1 hr	0.545843	0.169675	0	0	1.01245	0.220098	1.50227	41.921	5.64011	0.824366	0.78835	0.331347	0	0.240107	0	6.19155	0.13526	0.146465	0.649088	0	0.798755	0
BLOC1S2	Bloc1s2	1 hr	1.70013	5.80662	3.64591	0.590201	0.691378	1.05431	0.330966	4.08409	1.98403	0.854219	1.2393	0.104198	1.08476	1.08275	0.900277	0	0.607819	2.76325	0.660925	2.86921	2.96158	0.284656
BLOC1S3	Bloc1s3	1 hr	3.97884	0.754234	2.02642	2.7407	2.26073	0.667909	0.358126	0	1.0507	0.885448	0.588983	1.57555	1.11137	1.24061	1.17205	0	0.630419	3.74848	1.29537	0.352699	7.70808	7.30507
BLOC1S5	Bloc1s5	1 hr	0	0.348621	0	0	0	0.613375	0	0	0	0.80084	0.509775	0	2.11639	0	0	0	0.106888	3.68189	0.291065	1.85657	0	0
BLOC1S6	Bloc1s6	1 hr	0.634664	0.36895	0.0348168	0.0860973	0.653017	1.46608	0.553425	1.92504	2.00291	0.866236	1.35192	0.550726	2.90504	0.84181	1.94744	0	1.37351	1.66756	0.281908	0.40822	1.27324	0
BLVRB	Blvrb	1 hr	0	0.554739	0.126206	0	0.438475	0.373749	0.38085	0	2.3756	0.487172	0.42062	0.480679	1.00174	0.115858	0	14.168	0.0342907	0.879791	0.326472	0	0.0448417	0
BMF	Bmf	1 hr	0.138554	2.04937	0.495371	3.29528	0.43158	0.737268	0.768259	0	0.42953	0.73558	1.04404	0.920439	2.92327	1.45898	1.09686	2.55608	0.0917666	1.79916	1.82737	2.17611	3.05531	2.11244
BMP2	Bmp2	1 hr	7.59263	0.406302	0.572416	1.9456	0.79288	0.192851	2.29273	0	0.19811	1.38239	0.431723	0	0.411123	0.953735	0	0	0.184962	0	0.228791	2.3129	5.4568	0
BMP4	Bmp4	1 hr	1.42228	0.415654	0.182045	0.670337	0.59456	0.295935	0.325528	0	1.38372	0.939368	1.42811	2.2222	2.56925	1.26893	3.2091	0	1.28373	1.36668	0.524611	4.79011	1.23396	3.30774
BMP6	Bmp6	1 hr	0	1.52537	2.12284	0.167186	0.208327	3.46583	0.634153	0	0.545844	1.7413	6.33027	1.52721	2.28846	1.12733	0.937342	0	0.863444	1.01831	0.21252	0.979793	1.20253	1.28665
BNC2	Bnc2	1 hr	0.244512	1.02031	0.573661	0.79853	1.14575	0.241117	1.06557	0.961649	2.72677	0.726413	0.347671	0.312355	0.290074	0.590061	1.06781	0.775886	0.866676	0.304201	0.827844	0.547046	0.993691	0.846851
BNIP1	Bnip1	1 hr	0	0	0.0494741	0.380621	0.796863	0.647451	0	0	1.60329	0.388537	0.32488	3.10467	0.918569	0.0989482	4.01301	2.11584	1.7814	0.301792	0.0583794	0.755635	0.234507	0
BNIP3	Bnip3	1 hr	0.0504952	0.0899585	0.130236	0.986804	2.34048	0.856494	1.40039	0	2.80722	0.625341	0.90736	0.431505	0.237076	0.753727	0.491403	0	0.0233226	1.02612	0.738548	0.956966	0.339769	0.0837392
BOD1L1	Bod1l	1 hr	0.108844	0.704619	0.580942	0.38507	1.00664	1.13733	0.454447	0.230214	0.506859	1.06687	0.934505	0.580001	0.94946	0.784616	0.598119	0.825078	0.383643	0.437355	0.881425	0.530521	0.306233	0.434465
BOD1L2	Bod1	1 hr	9.47846	1.21265	46.0394	3.69569	3.0275	0	0	0	0	0	0.428964	0	2.71402	0	0	78.9377	1.39413	12.4812	4.30614	69.517	4.09991	289.559
BOLA1	Bola1	1 hr	0	0.300205	0	0.10044	0.774506	1.12493	1.35036	0	2.48924	0.602083	0.696943	0	0	0.508339	0	1.58472	0.0362701	2.41949	0	0.22599	2.20355	0.631099
BOLA3	Bola3	1 hr	0	1.03932	0	0	0	1.49066	0	0	5.04129	0.337027	0.497343	1.45468	0.295582	0.136633	0	0	0.105207	0.144831	0.732807	4.5107	0.32382	0
BPHL	Bphl	1 hr	0	0.201308	0.121917	0.444747	1.30396	0.258448	1.26446	0	0.917932	0.373256	0.255025	0.8916	0.325463	0.331124	1.3586	0	0.100193	0.294786	0.650268	0.148644	2.71548	0
BPNT1	Bpnt1	1 hr	0	0.0890679	1.0527	0.0391986	0.923563	0.935322	1.13916	4.08776	0.936847	0.692726	1.06642	1.47474	0.858014	0.973432	1.02787	0.826873	0.0503049	1.45296	0.176611	0.245862	1.72735	3.22496
BRD1	Brd1	1 hr	0.0482089	1.25398	0.652645	0.0983898	0.922346	1.08673	1.97325	0.59852	0.896962	1.45751	1.05413	0.740042	1.11128	1.4878	2.30068	0.382566	0.809356	2.50993	1.89097	1.76384	1.37536	0.20601
BRD2	Brd2	1 hr	1.10191	2.50916	1.26145	1.80083	0.0854	1.99214	0.0331258	0	1.04504	2.1236	1.74107	0	0.00882413	2.5273	0	0	1.53874	0.00322963	2.07519	2.38737	2.48158	1.85543
BRD9	Brd9	1 hr	1.05988	9.3662	8.31195	6.36439	1.11808	1.21763	2.43965	6.60311	1.06363	1.06866	0.873306	7.56523	1.14502	2.23445	1.85098	1.33573	3.50904	1.73651	4.59514	6.91665	3.65545	5.83989
BRF1	Brf1	1 hr	1.10132	3.78067	3.33805	1.30189	0.94037	0.915536	1.06264	1.11522	0.873057	1.25763	0.650975	0.666898	0.757917	1.42481	0.170868	0.117754	1.18705	0.508328	2.29484	3.53346	2.127	2.08541
BRF2	Brf2	1 hr	0	0.0781545	0.330695	0.463611	0.930943	1.49929	0.699138	0	3.94601	1.63114	0.694353	5.96792	2.14314	0.760279	2.36643	1.33288	0.679466	0.359405	0.277528	0.380139	0.180234	0
BRI3	Bri3	1 hr	0.304945	0.142786	0.165079	0	1.51146	0.813187	0.192681	0	1.64495	1.05762	0.623161	2.49822	1.495	0.921736	1.10884	1.70254	0.0613075	0.0843974	0.42703	0.0578573	0.598478	0.300168
BRI3BP	Bri3bp	1 hr	6.71784	0.0802606	0.168088	0.912863	2.43673	1.16067	0	0	0.789094	0.713158	0.423192	0.434542	0.608846	0.38644	0	0	0.151874	0	1.94787	0.0589118	0.367523	0
BRIX1	Brix1	1 hr	0	1.18529	0.0423822	0	0.862901	2.01739	0.371551	0	1.73965	0.917716	1.88375	0	1.76508	0.981289	2.06627	0	1.06747	0.341035	0.229146	0.114432	0.200892	0
BRK1	Brk1	1 hr	0	0.0302651	0	0.0419714	1.4877	0.794029	1.59134	0	1.72097	0.82872	0.809733	0.338198	1.51439	0.495804	0.510651	1.39619	1.98921	0.619006	1.57678	0.239836	0.194153	0
BRMS1	Brms1	1 hr	0.434105	3.89559	1.06777	1.8218	0.707786	1.62021	1.49403	2.31387	0.565638	1.0326	0.822889	0.0844581	0.799629	0.952115	0.48118	1.11854	0.264266	0.318818	1.35096	1.80786	0.541085	1.13488
BRPF3	Brpf3	1 hr	0.112233	0.668087	1.49041	1.08446	1.16881	0.748431	1.12636	0	0.463605	0.742347	0.699692	0.637358	0.590471	1.22575	1.46833	0.307517	1.28583	0.4993	0.808242	0.78205	1.17882	0.66709
BRSK2	Brsk2	1 hr	18.0217	9.92495	6.86141	3.5239	0	0.592105	0.50872	6.1635	0.316724	0.709826	0.5872	2.23809	4.301	0.265571	5.76479	4.16436	0.118421	49.2078	0.365774	13.1903	15.0913	2.5436
BRWD1	Brwd1	1 hr	1.3906	0.425843	0.765158	0.564269	1.37853	1.07912	0.75806	0.527755	0.911327	1.14496	1.44319	0.432359	1.13184	0.906279	0.285329	1.19084	0.876939	1.28898	0.649265	0.478652	0.806113	0.732883
BSCL2	Bscl2	1 hr	2.8437	0.446269	0.195453	4.86756	1.13228	0.570955	0.633057	0	1.4606	0.670607	0.392351	0.440492	0.2046	0.182455	0	0	0	1.27574	0	0.34421	0	0.544477
BSPRY	Bspry	1 hr	0.310058	2.2225	0.0404833	3.43841	0.938177	2.20289	0.820807	0	0.0709242	0.649302	0.654637	1.06261	0.930488	0.224384	0	0	0.677546	0.60976	1.5652	1.21167	3.23631	0.177467
BST1	Bst1	1 hr	0.678382	0.210875	0	0	2.53548	0.165119	0	0	0.595822	0.904178	0.223806	1.59947	0.497347	0.789788	0	0	0.168103	0.182029	0.806698	0	0.219828	2.31963
BST2	Bst2	1 hr	0	0.0872233	0.454841	1.66035	0.460392	0.83375	0.949483	1.61396	1.10718	1.7089	1.26667	4.57325	2.08527	0.919091	0.702397	0	4.34273	1.86406	1.42587	1.84289	3.36859	3.08434
BTBD6	Btbd6	1 hr	0.56425	0.432481	0.0642236	0.370946	0.87904	1.08864	1.26327	0	5.84055	1.17279	1.13847	0.645558	0.874295	1.23939	0	0.449249	2.20417	2.02684	1.49138	0.265753	0.215133	1.16694
BTD	Btd	1 hr	1.40095	0.169518	0.0274301	2.30925	1.58619	0.53763	0.442539	1.37626	1.04728	0.337207	0.396639	0.906291	0.217612	0.371404	0	0	0.602548	0.220721	0.38201	1.95357	0.130019	0.206823
BTF3	Btf3	1 hr	0.0553827	0.751161	0.698236	0.64242	0.587712	1.00749	0.510784	0.423974	2.63629	0.854214	0.900776	0.541054	0.662905	1.23683	0.552622	0.502107	2.95374	2.01503	0.179885	1.18261	1.0381	0.297543
BTG2	Btg2	1 hr	0.556434	0.10668	0.269646	1.5088	0.503743	0.93479	0.538759	0.404585	0.585792	0.835632	0.79559	1.23872	0.628563	0.713741	0.332156	0.164697	0.160935	1.91172	1.35985	0.379455	1.22517	0.327596
BTNL9	Btnl9	1 hr	11.1984	0.677468	0.407518	5.26845	0.737635	0.40613	6.18031	5.3227	1.46366	1.15267	0.473016	2.87555	2.48125	0.0955816	0.396492	1.80911	0.240597	0.316609	2.49527	2.2849	0.0728727	1.46344
BTRC	Btrc	1 hr	1.29562	1.30012	1.86712	1.28617	0.802578	1.16249	0.44912	0	1.23664	1.03183	1.30012	0.0596264	1.02153	1.21853	0.672442	0	1.40054	0.0985953	0.282101	0.243654	0.0650351	0.402266
BUB3	Bub3	1 hr	0	0.0805761	0	0.0721004	1.22695	1.02715	0.148608	2.4548	0.949623	1.00669	1.164	0	1.72295	1.79765	0.533407	0	0.546403	0.253029	0.48922	1.03427	0.153694	1.67356
BZW1	Bzw1	1 hr	0.365354	0.0858351	0.289031	0.0394977	0.923712	0.902152	0.616518	1.50703	0.706067	0.852372	1.12356	0.224485	1.40498	0.37011	0.331246	1.83547	0.432663	1.87274	0.223715	0.516369	1.27208	0.164423
BZW2	Bzw2	1 hr	0.909438	0.486862	0.404947	0.155283	0.418837	1.56761	0.730293	0	12.5849	0.614187	0.837673	0.286347	1.14842	0.53423	0	1.57598	1.6018	0	0.0315196	0.665829	0.490067	0.201405
C11orf54	4931406C07Rik	1 hr	0.045025	0.00483061	0.0518152	0.0437034	3.89441	0.311848	0.526332	0.445943	0.271904	0.297584	0.280312	0.943678	0.150683	0.211203	0.414384	0.301982	0.0291204	0.118806	0.176933	0.103015	0.197075	0
C11orf58	1110004F10Rik	1 hr	0.0202064	0.419653	0.121713	2.13773	1.02508	1.29099	0.639554	1.82139	1.58081	1.21108	1.33602	0.899541	1.67313	0.852076	1.05968	0.928221	1.29605	0.425668	1.39596	0.557721	0.46297	1.03998
C11orf68	AI837181	1 hr	11.77	2.66197	0.467651	5.43151	1.86303	1.45295	1.52517	0	3.71494	1.40952	0.815106	3.42001	0.993884	2.33371	3.43466	0	0.384322	3.83766	2.18624	1.88828	2.96044	11.316
C11orf96	Gm13889	1 hr	0	0.0330033	0	4.03918	0.43671	0.700847	0.335589	0	0.18324	1.87185	1.18867	0.64762	0.250358	2.54714	4.87681	0	2.38824	0.168128	2.72782	1.6845	1.83651	0.125679
C12orf57	Grcc10	1 hr	0.0969056	0.0120777	1.15107	0.333202	0.408083	0.531276	0.266704	3.78983	1.933	0.854531	0.644664	1.59496	0.423997	0.471456	1.89207	0	0.936233	6.92065	0.115235	0.749811	0.927708	0.331355
C14orf132	D430019H16Rik	1 hr	0.610104	1.73132	3.34125	0.305097	0.366785	0.337702	0.370398	0	0.795799	1.55854	1.31269	0.850171	0.763826	0.821901	1.21217	1.70558	0.21812	0.949431	0.286762	0.273214	0.781168	0
C15orf39	1700017B05Rik	1 hr	0.233321	2.35899	0.461768	0.476185	1.02162	1.42043	1.83793	0	0.855915	1.81316	1.32905	3.78268	0.777532	2.75517	2.09542	6.23285	1.21067	3.35929	1.68503	2.01115	1.06304	0.229665
C15orf61	2300009A05Rik	1 hr	29.9289	0	0	1.65615	0.973136	0.185647	0	0	8.04413	0.232275	0.227957	0	0.676101	0	0	0	1.41178	0.413605	0.276312	0	3.40986	0
C15orf65	Ccpg1os	1 hr	0	0	0.259965	0	0	0.372617	0	0	2.42981	0.381282	0.422877	0	0.866551	1.80416	0	0	0	1.17158	0	0.377816	0	1.96014
C16orf54	AI467606	1 hr	24.5968	0.548134	0.198343	0.887162	0.652686	0.821816	2.73913	0	0.684975	1.29999	0.626548	10.7244	1.98266	2.30631	0	0	0.0499701	2.98744	0.401298	0.311352	0	0
C16orf58	BC017158	1 hr	0	1.60274	0.315394	1.3646	1.3065	1.06452	1.27446	1.18935	0.414629	1.14584	0.947707	2.1031	0.616151	1.59901	0.727989	0.672833	0.161794	0.567099	0.769412	1.49152	0.127435	1.06079
C16orf70	D230025D16Rik	1 hr	2.28188	3.16832	1.72455	2.00002	1.39693	0.809589	2.48327	0	1.58597	1.0825	0.982236	3.75481	1.051	1.63642	4.27765	0	0.162003	1.01417	1.53445	0.0862171	0	2.36022
C16orf89	AU021092	1 hr	0	0.0143843	0.0253841	0.0304609	0.0751368	1.91582	0	0	0.139612	0.177011	0.00676908	0.07006	0	0.728015	1.12316	0	0.0714138	0	0.137243	0.511912	0.230149	1.24839
C18orf21	2700062C07Rik	1 hr	0	0.105553	0.185256	0.211106	1.21637	1.32264	2.5584	0	4.61704	1.09	1.81379	0.657013	0.511249	0.165151	0	2.03925	0.226185	0.866683	0.840115	0	2.39397	0
C18orf32	BC031181	1 hr	3.40047	0.170974	0	0	1.11046	0.61539	2.36082	0	1.24862	0.30568	0.227389	0.238327	0	0.328707	0	0	0	2.23705	1.51171	0.125496	0.127223	0
C19orf12	1600014C10Rik	1 hr	0.587973	0.196983	0.132172	2.14853	2.36167	0.98555	1.11156	2.35253	2.71887	1.23863	0.901615	0.5034	1.77922	0.914152	2.82958	1.15618	2.43561	0.733957	0.172333	2.74649	3.32044	0.495538
C19orf25	2310011J03Rik	1 hr	0	0.0214076	1.4056	0.0453337	1.81133	1.45244	5.5501	0	0.837918	1.28471	1.03336	4.93281	1.2434	1.73427	3.35369	0.798125	0.191661	0.230446	3.31188	0.180076	1.80781	1.2366
C19orf33	2200002D01Rik	1 hr	1.70372	0	0	6.7709	1.55742	1.13149	0	0	0.372598	0.645019	0.34377	1.15887	0	0.75024	0	0	0	7.23214	1.15959	0	0	0
C19orf38	AB124611	1 hr	0	13.6672	4.56093	0	0	0	0	0	2.50216	0.697494	2.36474	4.1694	6.40968	0	7.45722	27.9697	1.45722	0.474503	3.03371	7.84356	3.52636	0
C19orf47	2310022A10Rik	1 hr	0	0.605698	0.107762	0.169341	0.701781	0.893417	0.498201	0	4.54618	0.513065	0.76681	1.31544	1.11637	1.10124	0.861301	0	2.87454	0.320367	0.427067	0.107497	1.3895	3.61083
C1D	C1d	1 hr	0	0.0840936	2.2138	0.253074	0.88576	1.33518	0	0	3.23245	0.640222	0.595002	0	2.08171	0.567235	0	0	0.167394	0	0.207061	0	0	0.448631
C1GALT1	C1galt1	1 hr	0.1795	0.68003	0.118637	0.56321	1.77593	0.986889	0.219833	0	1.01741	0.803936	1.02795	0.215201	0.843089	0.963634	0.428766	2.757	0.439213	0.0166238	0.339016	0.479364	1.41947	0.21184
C1orf115	C130074G19Rik	1 hr	0.295402	0.591767	1.42624	0.711371	2.53521	0.592904	0.803643	1.98228	0.480647	0.784708	0.671707	1.19748	0.312239	0.781472	0	0.328682	1.77534	0.891193	0.868802	1.12751	1.56561	0.158743
C1orf122	1110065P20Rik	1 hr	0	0.537777	0.0798601	0.125494	0.691006	1.13437	1.78033	0	1.10349	0.574363	1.00946	2.38085	2.20953	0.204765	6.14431	0	1.6452	1.40149	1.52737	1.51892	1.56022	3.69225
C1orf210	2610528J11Rik	1 hr	0	0	0.0779986	0.232956	2.11168	1.97752	0.976023	0	0	0.374393	0.711347	3.03051	0	0.356194	0	8.25693	0	0	0.421713	0	0.0686388	0
C1orf56	Gm128	1 hr	4.83155	0.555275	0.782296	0.10782	0.265957	0.811048	0	0	1.4999	0.626556	0.732579	0	0.299501	0.227022	0	0	0.252779	0.190483	0	4.13431	0.132379	0
C1QA	C1qa	1 hr	0	0.0381202	0.589696	1.60779	1.25486	0.762404	1.35651	0	0.490636	4.10609	2.52657	3.13882	2.85876	3.89163	0.841497	0	3.11808	4.4235	5.70377	2.1853	0.864577	3.18835
C1QB	C1qb	1 hr	0	0.0413316	0.571685	0.0409142	0.895797	0.400374	1.4043	4.49276	0.0719477	2.38861	1.14267	0.329679	2.77006	1.64645	2.21618	1.9977	0.28125	0.311588	3.87418	0.0995021	0.313814	0
C1QBP	C1qbp	1 hr	0	0.346531	0.885819	0.255674	0.809689	0.91021	0.525022	0	2.14164	0.617983	0.612921	0.501815	1.14623	0.631986	0.409972	0.164817	1.46337	0.200384	0.545534	0.849726	0.471902	0.0743552
C1QC	C1qc	1 hr	0	0.376009	1.3467	1.02557	0.394988	0.355104	1.53305	0	0.0711033	1.88431	0.505837	0.0569377	0.844163	1.07755	0.831235	0.606235	2.65296	0.979905	2.24367	0.949236	0.0683527	0.320721
C1QTNF4	C1qtnf4	1 hr	71.0921	9.35033	20.2697	3.14803	2.19079	0	3.58224	0	4.39638	0.917763	0.0493421	46.4457	6.84868	0	0	0	0.567434	3.33553	0	0	1.09046	0
C1R	C1ra	1 hr	1.45835	0.575441	0.396616	0.272602	0.681822	0.521279	0.357703	1.31192	0.319561	2.80592	0.989253	1.38703	0.3068	1.22713	3.79009	0.0772654	2.38187	1.59509	1.01879	0.395109	0.316774	0.925695
C1RL	C1rl	1 hr	0.35261	1.49584	1.16625	0.332817	1.33134	2.19911	2.37253	0	0.347512	2.54775	2.28481	0.572289	1.27586	3.38305	2.16282	0.563517	0.949866	2.74508	1.8405	1.24092	0.767376	2.18367
C1S	C1s1	1 hr	0.0620409	0.138332	0.593824	1.34007	1.43539	0.858495	0.704285	2.43566	0.69384	4.03917	2.36068	1.8822	0.835951	2.02517	7.56332	1.2836	2.25407	2.63708	1.33519	0.494018	0.516824	1.04808
C2	C2	1 hr	2.5116	6.92252	5.32253	0.490669	0	0.552322	0	0	0.885671	0.956678	0.762366	0	0	1.13568	0	0	11.0129	0	1.84065	1.92228	5.99816	0
C20orf173	6430550D23Rik	1 hr	0.882991	0.72822	0.19849	0.748325	0	0.0363791	0	0	0	0	0.134347	0.132114	0	0	0	6.68961	1.54292	1.97149	0.666631	0.360281	2.76003	0
C3	C3	1 hr	0.303281	0.548268	2.46817	0.916426	2.95719	1.32434	1.34732	4.41157	0.818968	1.78076	2.6907	2.49046	2.35515	2.28582	1.95804	1.03171	1.39863	0.282059	0.42505	1.35466	1.13568	3.69075
C3orf14	3830406C13Rik	1 hr	0	0.112753	0.137218	0.795119	0.599397	0.387188	1.28708	0	0	0.300496	0.253693	0.220187	1.70299	0.249439	2.06944	0	9.14892	0.359532	0.622267	1.98859	2.78425	0
C3orf52	BC016579	1 hr	3.5274	0.27127	1.89854	0	0.76236	1.06326	0.429349	0	0.0475477	0.498719	0.314915	0.285286	1.07036	0.232239	0.690329	0	0.290076	0.268432	0.285464	0.126853	0	0
C4orf19	0610040J01Rik	1 hr	0	0.259876	1.77142	0.033481	2.00237	2.37157	0.467025	0	0.0305201	0.822106	1.38217	0.0471467	0.744439	0.710388	0.327521	2.08994	0.0130963	0.593775	0.0594458	0.19132	0.817436	1.40016
C5AR1	C5ar1	1 hr	0	0	0.89005	1.59814	1.15448	1.56134	0	7.54498	0.182644	1.10881	0.851204	1.61449	4.50682	2.36688	3.03339	6.37687	0.115175	0	0.120627	4.70377	3.12744	7.55588
C5orf15	9530068E07Rik	1 hr	0	0.250399	0.161102	0.737552	0.942707	0.865499	0.479093	0	0.927229	0.712548	1.07075	1.36456	0.938128	0.498967	0	0	0.0105325	0.477536	0.965329	0.483306	0	0
C6orf132	AI661453	1 hr	5.59873	1.192	1.00474	4.35348	0.384679	1.13423	1.03542	0	0.0697738	0.744322	1.3138	1.24197	1.28692	0.986376	0.534898	0	0.611752	1.64174	3.45904	1.09617	2.78695	2.53289
C6orf136	2310061I04Rik	1 hr	2.50851	0.480807	4.23467	0.591611	0	2.01979	0	0	4.18757	1.63751	0.839335	0	0	1.7689	0	0	0.0668777	0	0.826672	0	2.5837	1.94302
C6orf89	BC004004	1 hr	1.03814	0.794392	0.553967	2.99852	1.4411	0.973439	0.740663	0.620546	0.894241	1.14958	1.05015	1.19769	0.615689	0.943993	1.66745	0.218053	0.438325	0.217021	1.20289	1.15432	1.29019	1.20534
C7orf26	E130309D02Rik	1 hr	0.15454	3.20953	0.790825	0.197593	1.83068	1.47538	1.18533	1.70537	0.991138	1.57236	0.981847	4.22106	0.314517	1.67025	5.28652	0	0.370487	3.62556	0.980941	2.07382	2.82114	2.23017
C7orf57	Gm11992	1 hr	19.2458	0.296627	0	11.7883	0	0.579294	0	0	0	0.649089	0.991082	3.1931	0	0	0	0	3.48275	4.2121	1.11671	0	16.0143	0
C8G	C8g	1 hr	131.318	0	8.74158	1.46107	2.54942	0.566538	6.53506	0	2.5693	0.616234	0.40751	42.2667	0	0.80508	0	0	16.3749	142.39	0.879625	0	0	0
C8orf33	1110038F14Rik	1 hr	0.181945	0.370244	2.90396	1.01011	0.426156	0.964715	0.15191	4.58964	1.30469	0.880731	0.867562	0.273669	1.22545	0.438171	0.514183	1.97598	0.0649227	0.877843	1.5191	0.973494	0.11529	0.269395
C9orf16	1110008P14Rik	1 hr	0.294233	0.524184	0.0647141	0.0776569	0.832223	1.96817	4.35353	6.15431	1.554	1.74469	3.02085	0.394756	2.69512	2.83232	2.69038	0	0.182062	5.75912	2.62523	5.57619	6.42783	1.00609
CA14	Car14	1 hr	0	0.17888	8.81869	1.40427	0	0.261628	0	0	12.4218	0.126555	0.118037	0	0	0	0	0	0.383315	1.46877	1.42374	3.68104	7.13332	1.37628
CA3	Car3	1 hr	2.66233	0	0.250325	13.0767	2.90217	4.31287	14.5466	0	501.745	0.229362	0.382887	0.564157	1.15914	0.489553	3.72652	0	0.142427	2.39597	0.109132	0.134411	12.7167	68.9973
CA4	Car4	1 hr	0.230114	2.06942	0	0	1.7138	0.67763	0.599172	0	0.710211	0.160714	0.2475	1.11521	0.642419	0.116006	0	0	0.352841	0.176347	0.235081	0	0.198701	0.71737
CA5B	Car5b	1 hr	0	0.754157	3.91385	0.794865	0.856751	0.607561	0.569442	1.77092	0.611561	1.04947	0.86028	0	1.23489	0.705919	0.98311	2.74885	2.24765	0.356019	0.617915	0.265661	0.647563	0.854162
CABLES2	Cables2	1 hr	12.611	0.361705	3.23708	0	1.57263	0.907051	0.368299	0	2.30213	0.762978	0.953723	0.815738	0.25365	0.87915	0	11.0672	3.02452	11.5035	4.48808	0.110591	2.00333	1.18302
CABP1	Cabp1	1 hr	1.34134	0.0168785	0.568507	1.48074	0.251191	0.594718	0.144162	0	0.267276	0.186855	0.384631	2.04607	0.0992851	0.403296	1.07824	0	0.750199	0.0951152	0.0635425	0.897736	0.447776	0.463066
CABYR	Cabyr	1 hr	32.5192	10.6485	0.521212	24.1697	0	0.644444	11.6869	0	1.04444	2.22222	1.84242	11.7737	1.31111	0	9.53535	0	3.30303	5.35354	0.646465	3.39394	19.0606	0
CACFD1	Cacfd1	1 hr	0	0.0443372	0.520999	0.0438893	1.57524	1.08992	2.19088	0	0.387988	0.612062	0.554737	1.40521	0.369029	1.8326	0	0.473079	0.890028	0.515625	2.67008	1.92949	1.07156	0.16884
CACNB3	Cacnb3	1 hr	2.16922	0.0464296	0.447569	1.25892	0.310625	0.511664	1.07742	1.17653	0.354085	1.55359	0.838078	0.143041	2.09856	0.366903	1.06319	0.495406	0.59061	0.74475	2.46702	1.07898	3.36685	1.34365
CACTIN	Cactin	1 hr	3.8619	4.827	2.31237	3.42948	0.687134	1.22563	1.6378	2.51076	0.875279	1.01954	0.722575	0.588374	0.383665	2.94268	2.25055	0.814085	2.62115	1.45453	2.48251	5.91143	1.64292	5.82098
CACYBP	Cacybp	1 hr	1.39528	0.0554969	5.70046	0.0496593	0.968355	1.19945	1.22054	0	3.34873	1.18163	1.26499	1.30577	1.32453	0.836035	2.32309	0.943214	0.792213	0.626734	0.943837	1.28826	0.0553413	0.282544
CADM4	Cadm4	1 hr	0.760119	0.0117153	2.77736	0.942189	1.33789	1.4465	0.491079	1.83035	0.325962	0.46503	0.934471	2.82312	0.527742	0.499487	0.575843	0.436775	0.3946	1.70313	1.52231	0.416928	0.989326	1.01675
CADPS2	Cadps2	1 hr	0.0934112	0.484575	0.352852	0.830304	0.511156	0.971167	0.792332	0.197088	0.140392	0.762452	0.756848	0.415047	0.827057	0.522338	0.293118	0.129576	0.523228	2.02231	0.329073	0.472582	0.585869	0.646441
CALCA	Calca	1 hr	5.33225	0.140368	0.982573	2.76377	0	0.0943792	0.249161	0	0	0.103302	0.135563	1.09617	0	0.130072	0	0	0.108107	1.04606	0	0	0	0
CALCOCO1	Calcoco1	1 hr	0	0.917228	0.546329	0.70572	1.39616	1.03811	1.50063	1.01388	1.34533	1.53971	1.0057	0.509231	0.976386	1.756	1.36035	0.163347	0.483759	0.335756	0.875087	1.27437	0.670882	1.05854
CALD1	Cald1	1 hr	0.534292	0.794882	0.83997	1.30236	0.827812	0.715037	0.715037	0.641986	0.149294	5.74267	0.725485	0.725485	0.816497	1.57751	3.4456	1.36029	1.84064	0.649325	1.69453	1.10981	0.512903	1.40158
CALML3	Calml3	1 hr	0.535963	0.10421	0.12048	0.0348657	0.131327	0	0	0	0	0.0455191	0.171229	0.0801911	0.0637268	0	0	0	0	0.752712	0	0.0422262	0	0.451705
CALML4	Calml4	1 hr	0.840384	0.8601	0.804403	0.830609	0.775322	0.19839	0.656042	0	0.292615	0.445658	0.313399	0.698677	0.568389	0.590651	0.859607	0.205948	1.58465	0.0150333	1.11846	0.0587365	0.324406	0.191572
CAMK1	Camk1	1 hr	0.458458	0.3781	1.05725	1.44877	2.72656	1.00539	3.29752	1.45739	0.507999	1.06057	1.14755	0.821149	2.00631	1.48191	0	0	0.625969	0.307517	2.00913	1.51638	0.225336	2.25402
CAMK2G	Camk2g	1 hr	0.500337	1.08582	1.17115	0.794107	1.32575	0.49839	1.18481	0	2.91733	0.783286	0.581736	0.954545	0.383518	1.02134	2.14879	0.264752	0.357646	0.783174	0.394638	0.228209	0.557848	1.49528
CAMTA1	Camta1	1 hr	0.317819	2.01341	0.512832	0.357294	0.608091	0.644108	1.14691	0	0.881248	0.65696	0.70894	0.593799	1.02952	0.845749	0.359368	0.201237	2.69976	2.68063	1.41465	0.873583	1.61843	0.20919
CANT1	Cant1	1 hr	1.3603	0.00547857	0.359716	0.0288753	0.903062	0.766549	0.909056	0	0.594586	0.861876	0.815985	1.13684	0.904544	0.750048	0.42778	1.62965	0.816565	2.62514	0.781566	0.108282	0.462649	0.0728972
CANX	Canx	1 hr	0.0487446	1.64362	0.804567	0.433603	1.80842	1.46226	0.755446	0.858844	0.318236	0.985027	0.80918	0.873486	1.46226	0.649523	0.612815	0.84109	0.531907	0.858844	1.57801	0.954594	1.01444	0.688
CAP1	Cap1	1 hr	0.116004	0.228852	0.588409	0.0701009	0.522846	0.72348	0.631624	1.11809	0.383483	1.06451	0.883957	0.628836	1.42683	0.501781	0.428943	1.88488	1.75319	1.7767	0.430669	0.791188	1.33303	0.494357
CAPG	Capg	1 hr	2.41522	0.181957	0.424676	0.334696	0.261554	1.57725	0.80809	0	0.13863	0.818073	0.63179	0	1.44301	0.584537	0.258959	0.131909	0.321785	1.79088	0.211307	0.11181	3.18051	0.241588
CAPN12	Capn12	1 hr	0.615193	0.174048	2.29275	0.666904	1.99652	0.158107	2.24203	1.65673	0.0204403	0.32674	0.183429	4.13635	0.1967	0.669878	0.247496	0.151167	0.776275	0.0920578	0.284639	1.37637	0.780622	1.03758
CAPN2	Capn2	1 hr	0.0208113	0.6386	0.564433	0.551416	0.464611	1.07958	0.593691	0.617567	0.427738	1.13324	0.921375	0.695663	1.40281	0.966399	0.679949	0.139581	0.522505	0.576756	0.591374	0.675367	0.549962	0.224691
CAPN5	Capn5	1 hr	0.281578	1.79845	2.30259	1.58261	1.17139	1.7201	0.701349	2.1417	0.192535	0.977838	1.40188	1.41959	1.2064	0.861727	0.777366	0	1.68041	0.39545	0.677333	2.42999	3.74568	0.369399
CAPNS1	Capns1	1 hr	1.45873	0.548664	0.510007	0.283521	0.669916	1.06758	0.982271	1.31878	1.27664	1.1219	0.92161	1.80411	1.49326	0.856125	1.47126	0.872285	1.90937	0.41787	0.667557	0.635343	4.77331	0.983539
CAPRIN1	Caprin1	1 hr	0.0470311	0.172245	0.171518	0.17739	0.72925	0.980404	0.484101	0.517239	0.912689	1.00598	0.946643	0.551786	0.915313	0.665894	0.191001	2.17227	0.846664	1.22751	0.518588	0.485613	0.637901	0.632326
CAPSL	Capsl	1 hr	4.53049	0.193231	1.72932	0.0796772	0	0.26017	0.818453	0	0	0.050408	0.140926	0	0	0.0813033	0	0	0	0	0	0.109759	0.90355	0
CAPZA2	Capza2	1 hr	0	0.109262	0.231452	0.212539	0.809746	1.06016	0.977087	0.478513	3.006	0.716189	1.00581	0.493355	1.65851	0.5793	1.1666	0.317061	1.06576	0.249646	0.423594	0.474203	0.828419	0.651359
CAPZB	Capzb	1 hr	8.29536	0.155186	0.498444	0.601766	0.821209	0.967146	0.872777	0.600286	2.12303	1.6153	1.01712	1.04731	1.45446	1.29768	0.97595	0.201279	2.33737	1.80178	0.834267	1.33312	1.24807	0.503253
CARD10	Card10	1 hr	0.871718	1.94332	1.38556	1.23055	1.15117	0.565145	2.48946	0.400989	0.360313	0.698324	0.336626	1.12735	0.378061	1.30197	0.789508	0.785846	1.4972	0.113946	1.18885	1.34848	2.03071	1.15797
CARD6	Card6	1 hr	0.428	1.4752	0.0402427	0.498475	0.383099	0.808225	0.353165	0	0.30073	0.709898	0.763026	1.11262	2.17291	0.776605	0.385676	0.376359	3.74991	0.0906948	0.769667	1.0589	0.0336017	0.486679
CARHSP1	Carhsp1	1 hr	0.630139	0.51761	5.18227	1.82256	2.23269	1.27089	4.0286	11.2085	0.422478	1.42759	1.38848	1.38502	2.72304	0.887155	1.62871	0.762287	1.87142	1.58096	0.958103	2.04218	1.06718	2.63235
CARM1	Carm1	1 hr	0.61488	0.785696	2.43837	0.723325	0.654359	1.43326	1.87869	2.94714	4.31134	1.15546	0.88609	1.71088	0.875323	1.68595	2.92017	2.40326	1.28631	2.77923	1.27554	1.3932	1.91021	2.94238
CASK	Cask	1 hr	2.3653	0.362025	0.269899	0.113405	0.526789	0.792094	0.308104	0	0.622639	0.714911	0.904483	0.0200212	0.748569	1.09009	0.657072	0.199003	0.182705	0.850948	0.180481	0.255197	0.638791	0.175548
CASKIN2	Caskin2	1 hr	5.64277	0.753918	0.590211	1.16526	0.723483	0.891224	0.980208	2.84101	0.400672	1.06182	0.894402	0.237453	1.14823	0.420269	1.11389	0	0.56772	0.852232	0.66469	1.44032	0.636658	0.816582
CASP1	Casp1	1 hr	0	0.398265	0.508392	0.341599	0.184274	0.419096	0.273425	0	0.437013	0.35369	0.583996	0.0603079	1.9029	0.793616	1.04257	1.39393	0.110856	0.0984737	0.543645	1.22757	2.17035	0
CASP2	Casp2	1 hr	0.917421	0.155636	0.526217	0.191503	1.33488	1.23382	1.42788	0	0.613578	1.34475	1.40726	0.205978	0.914603	1.41366	0	0	0.691845	1.91119	1.06294	0.14462	0.0636635	0
CASP7	Casp7	1 hr	2.8911	0.160319	0	0.331706	1.13486	1.84479	0.418524	0	1.67168	1.27373	1.51551	1.17118	1.51032	0.773059	0.939085	1.451	0.417659	1.06845	0.947905	0.912625	0.0382206	0.849154
CASP8	Casp8	1 hr	1.00167	2.2979	0.0186276	0.624522	1.21303	1.30331	1.63551	0	0.317166	1.15864	0.980682	0.506796	0.762242	1.78316	0.295062	1.29363	0.0945042	0.230486	0.613346	1.78366	0.569881	1.06736
CASP9	Casp9	1 hr	3.17469	2.46082	6.62581	4.79624	2.60889	2.04034	2.36126	1.86325	1.23751	1.30318	0.917857	1.23454	1.96599	1.45866	2.57733	2.1596	0.0489326	2.5142	1.75776	6.2424	6.75694	9.48657
CAST	Cast	1 hr	0.0228063	0.901102	0.435289	0.3957	1.08031	1.42337	0.472778	0.927688	1.37747	1.331	1.27401	0.229496	1.11926	0.95853	1.15491	0.560513	1.07116	0.656372	1.18961	0.67356	0.817711	0.691994
CAV1	Cav1	1 hr	0	0	0.0781082	0.13563	1.64784	0.524354	0.219793	0	5.88627	1.17404	0.454117	10.6418	3.7274	1.88852	13.8597	2.89697	2.35899	5.16422	1.49526	0.508611	3.09859	0.706001
CAV2	Cav2	1 hr	0	1.30696	0.0261882	0.152241	0.512939	0.312163	0	0	2.05437	0.987468	0.527779	0.557633	0.964947	0.202871	6.02694	0	0.223123	1.16485	0	0.0707081	0.0385839	3.05843
CBR1	Cbr1	1 hr	0.202183	0.00750907	0.047302	0	0.280849	0.967546	0.29551	0	0.454018	0.504895	0.419435	0.163156	0.482572	0.153246	0.685573	0.101245	0.220572	0.0162441	0.0266649	0.0206882	0.441809	0.0577738
CBX6	Cbx6	1 hr	1.13662	0.277208	1.65217	1.53889	1.20403	0.993658	1.63927	1.74023	0.31021	1.81481	1.31946	1.52349	1.53751	1.24779	4.22268	0.23345	0.988121	1.6056	1.10563	0.673525	1.56488	1.69049
CBX7	Cbx7	1 hr	0.0628877	0.229603	0.535941	0.339342	1.75358	0.93204	1.73196	1.02738	1.80059	1.6232	1.21233	1.98225	1.02142	1.73535	2.28722	0.920711	0.492319	2.44999	1.17555	1.19328	1.90316	1.47937
CC2D1B	Cc2d1b	1 hr	1.83909	1.77212	0.481202	1.81794	0.948412	0.738256	1.14777	0.963635	0.511186	1.01941	0.771738	2.75694	0.590989	1.89659	0.744138	2.14016	1.3194	0.55228	1.27897	1.57131	0.891251	1.72153
CCAR1	Ccar1	1 hr	0.0318907	3.46066	0.633339	0.859085	1.75745	2.31541	1.3733	1.40206	0.832681	1.69353	2.01456	1.07414	1.91492	1.51881	0.509684	1.47078	0.948581	1.04672	4.0565	2.75143	0.778821	1.6701
CCAR2	Ccar2	1 hr	0.846479	1.80664	0.642904	2.33612	1.15324	1.22174	1.74246	0.652565	0.756695	1.36117	0.966154	1.57808	0.908187	1.40225	1.12367	0.304726	0.599755	1.43715	1.67716	0.655434	0.656379	1.73571
CCDC107	Ccdc107	1 hr	4.54781	0.625375	1.65768	2.0001	0.857546	0.421339	0.300793	5.87175	1.67003	1.26425	1.14278	0.541885	1.49527	0.156687	2.59414	0	0.864179	0.790068	1.12975	0.0926397	0.0775428	0.258705
CCDC115	Ccdc115	1 hr	9.65172	1.02599	0.284188	3.8398	1.70882	1.61199	1.60808	0	0.979207	1.26318	1.00401	2.83491	1.66335	1.14088	3.4653	0.759865	2.21475	1.13457	1.19267	1.32628	1.13914	0.507447
CCDC12	Ccdc12	1 hr	0.122194	15.5218	2.67337	7.5089	1.62265	2.75972	3.73823	6.53773	1.40783	1.66977	0.823345	5.06152	1.63499	3.03006	1.14345	3.30742	2.28563	1.41964	9.90374	12.1052	1.84003	10.7803
CCDC124	Ccdc124	1 hr	0.13187	5.96067	1.54641	0.509462	1.39939	1.93995	1.7997	1.14701	3.41084	1.31491	0.713867	4.15661	2.48843	1.50566	2.18429	0.837014	0.894284	0.138527	5.02679	4.53868	0.672779	3.2062
CCDC14	Ccdc14	1 hr	0.386542	0.30854	0.316327	1.38787	1.38211	1.9369	1.33539	1.00087	0.589726	1.83494	2.40013	0.852525	1.64387	0.877457	0.273399	0.520035	0.0836296	0.776682	0.435555	0.149918	0.770008	1.22833
CCDC141	Ccdc141	1 hr	0	1.14312	0.579744	2.68985	0.159049	0.135481	0.102457	1.41041	5.79038	0.476158	0.395434	0.450755	0.667242	0.990278	0	2.09317	0.841391	0.61192	1.77338	0	0.0478416	1.04108
CCDC158	Ccdc158	1 hr	0.549505	1.55936	0.334177	0.316362	0.748644	0.253317	0.690725	0	0.0218012	0.174166	0.403729	0.0744333	0.152934	0.650295	0.764263	0	0.133004	0.215572	0	0.561463	0.110633	0
CCDC184	Ccdc184	1 hr	0	2.1294	51.9763	0	1.44487	0.261868	0	0	1.03828	1.29786	0.349158	13.3874	1.49081	0	0	0	6.57657	0.420368	0	0	1.63323	0
CCDC22	Ccdc22	1 hr	5.08281	1.06202	0.396201	0.196411	0.47436	1.03589	0.296193	0	1.41587	1.15865	0.975974	2.52834	0.268038	3.09438	0.647796	0	0.742173	1.92717	1.23455	3.23515	0.619866	1.39042
CCDC25	Ccdc25	1 hr	1.13814	1.67258	0.00663792	0.0130103	0.528511	0.732428	0.30499	0.71809	1.01392	0.568073	0.606617	0.0404913	0.352252	0.508332	0.1436	0	2.26477	0.230734	0.536609	0.833015	0.121784	0.103198
CCDC28B	Ccdc28b	1 hr	3.92962	2.63495	0.10688	0.128256	0.261499	0.265775	0.517299	0	23.7751	0.826538	0.463859	2.27583	1.20418	1.44715	13.6963	0	0.224448	9.5116	0	2.66416	0.506611	1.66163
CCDC38	Ccdc38	1 hr	0	2.76707	2.16135	1.00746	0	0.0951387	0	0	0.108261	0.0745601	0.162243	0.706531	0.126752	0.0685953	0	0	0.226961	0.054578	2.4748	0.120787	0.212049	0
CCDC6	Ccdc6	1 hr	0.30003	0.108009	0.0122113	0.835199	1.32261	1.19529	0.477615	0.416322	0.959017	0.922383	0.972506	0.531288	2.18559	1.6065	0.630257	0.667175	1.84803	0.519645	0.392751	0.326677	0.625193	0.349159
CCDC61	Ccdc61	1 hr	0.213247	3.85534	0.531355	6.74615	1.05696	1.57161	2.61761	4.52199	0.505001	1.47139	0.655332	3.2735	0.877487	1.278	2.63153	0.648094	2.12728	0.884169	3.31953	7.58633	3.35405	4.80521
CCDC71	Ccdc71	1 hr	0	0	0	0.0517043	0.434029	0.860303	1.02346	0	1.55199	1.23056	0.904538	6.15942	0.186423	0.497798	1.43049	0	0.121218	1.63012	0.600057	0.0626197	0.142761	0.669858
CCDC86	Ccdc86	1 hr	0.748566	5.48109	0.8621	0.81614	0.811104	0.99536	2.11768	10.1781	1.82724	0.723803	0.530103	6.57256	0.518771	1.44509	2.03479	4.8343	0.268199	2.01338	3.5443	4.41564	2.96048	1.54813
CCDC88B	Ccdc88b	1 hr	0.888243	6.12321	4.38664	1.33689	0.39751	0.628938	2.2722	1.00201	0.171241	1.2548	0.748499	7.40752	2.16603	7.85571	3.13637	1.17877	4.56756	4.72278	7.96314	5.88481	5.85585	2.96684
CCHCR1	Cchcr1	1 hr	0	3.82773	1.55423	6.68237	0.563675	2.65626	0	0	2.04692	2.65453	1.93967	0.175549	0	5.13236	0	0	5.92243	0.175549	5.83858	10.5065	7.21919	11.6238
CCKAR	Cckar	1 hr	0.298528	0.139781	0	0.388424	0	0.0296189	0.188626	0	0	0	0.0584584	0.107564	0	0	0	8.72615	3.12402	0.237731	1.28323	0.785941	0.259296	1.91666
CCL17	Ccl17	1 hr	27.5883	0	1.54597	0	0	0	0	0	0	0.0390635	0.0615546	0	0.503091	1.87031	0	0	0.273445	0.216625	0.960016	0.479416	0	0
CCL2	Ccl2	1 hr	0	0.328969	0.0638436	0.240697	0.254964	0.927272	0.420937	0	0.08468	0.418371	2.8357	0.5982	2.13661	0.918034	0.399382	0	1.76566	0.582496	0.120092	0.235154	0.471026	0.372592
CCL22	Ccl22	1 hr	0	2.04132	0	0	0	0	0	0	0	0	0.0645025	3.47175	0	14.3917	0	45.1745	3.78668	4.57968	1.98061	17.1539	0	4.29132
CCL28	Ccl28	1 hr	26.1201	5.06791	1.60616	0.135304	0.266466	0.97658	0.334117	0	0.208018	0.857844	1.7838	5.57046	1.76217	0.602424	0	1.15376	0.350225	1.03043	0.0814584	0.773164	0.101708	0.520505
CCL5	Ccl5	1 hr	0	34.2188	0	1.05813	0	13.8321	0	0	7.15415	5.34357	5.3612	0	0	22.2972	0	11.6512	67.3795	0	21.9386	119.54	10.452	0
CCND1	Ccnd1	1 hr	0.0353169	0.285179	0.445257	0.765876	1.57992	0.405053	0.466896	0.646892	0.291234	1.27694	0.496619	0.962654	0.765691	0.78481	0.97372	1.0008	0.796121	1.47052	0.519118	0.625038	1.06879	0.455185
CCND3	Ccnd3	1 hr	0.325969	0.210832	0.242546	2.3397	1.04602	0.818784	1.46121	0	0.312318	1.79586	0.8334	1.17274	0.790103	1.4397	1.48258	0	7.1516	1.11028	1.95209	0.951708	0.721848	0.851187
CCNI	Ccni	1 hr	0.0179906	0.306447	0.438765	0.0505953	0.896391	1.00892	0.707912	0.473955	1.40641	1.16886	2.19472	0.491392	2.03159	1.07894	1.40833	1.18952	2.59302	0.95002	0.901456	0.696226	1.52804	0.831446
CCNJ	Ccnj	1 hr	0	0.0621946	0.0540276	0.401647	0.199567	0.554307	0.152031	0	0.839523	0.625506	0.640165	0.33673	1.38482	0.098213	0	1.03616	0.0353902	0	0.169831	0.149728	0	1.0282
CCNK	Ccnk	1 hr	0.0530148	0.0418211	2.0455	0.579665	0.579976	0.932812	0.906771	0	1.48558	0.806027	0.843106	0.872568	0.678854	0.824605	0.302464	0	0.0179566	0.205996	0.942606	0.769881	0.105719	0.381675
CCNL1	Ccnl1	1 hr	0.0487229	1.73054	0.387246	0.503222	1.02782	1.29362	0.792157	0.605432	0.394795	1.02856	2.07621	0.545635	1.52458	1.44384	0.129247	0.354672	0.00355754	1.01167	0.844809	0.373944	0.408623	0.501243
CCNT2	Ccnt2	1 hr	8.60038	0.81193	0.352116	0.840889	1.23345	1.45995	1.09515	0	1.09351	1.21913	2.32122	0.821962	0.961899	1.34373	2.22241	0.199938	0.127509	2.52601	0.454767	0.0255522	0.985874	1.02228
CCR1	Ccr1	1 hr	0.534841	1.57556	0.0698325	0.634718	0.0993354	0.272293	0	5.29725	0.205167	0.548645	0.827434	0.112057	3.61072	0.185408	0	0	0.0311269	2.17942	0.435506	0	0.610358	0
CCR2	Ccr2	1 hr	2.43544	2.56109	1.24978	1.43644	0.0948838	0.462268	0	0	0	0.116343	0.50079	0.236563	4.6188	0.606791	0	0	0.0436931	0	0.415989	0.184855	0.0341271	0.602913
CCR5	Ccr5	1 hr	1.61255	2.66236	0.0805536	0.100388	0.0589799	0.127703	0.114393	2.11954	0.0233136	0.109609	0.154409	0.589103	0.252187	0.176679	0	0	0.0488889	0.131617	0.916885	1.3187	0.15467	0
CCR7	Ccr7	1 hr	1.40866	0	1.13527	6.16551	0	0.598284	0	0	1.09236	0.882714	0.153249	0.50756	0.872906	6.42787	0	45.9465	0.386187	0.224356	0	0	4.08745	16.6784
CCR8	Ccr8	1 hr	12.6336	0.120132	0.573807	0	0	0	0	0	0	0	0	2.27261	0	4.23995	0	12.8866	1.07553	0	23.0568	0	1.00487	0
CCRL2	Ccrl2	1 hr	0	0.170531	0	3.84797	0	0	0	0	1.03723	0.172537	0.25078	0	0	0	0	0	0.463442	5.31654	1.62706	0	0.264824	0
CCS	Ccs	1 hr	0	0.193625	0.456255	0.538327	1.9941	1.34948	3.34454	1.7643	0.791394	1.26008	1.13386	1.50008	0.359044	0.57753	3.25785	0.746454	1.52223	0.690996	2.59984	2.41578	0.531315	1.36972
CCSER2	Ccser2	1 hr	0.84362	0.608658	1.07114	0.0431418	0.815582	0.697671	0.921866	0	1.94433	0.935399	1.04348	0.801637	0.5466	0.784179	0.655165	0.193802	0.643089	0.499047	0.708849	0.31504	0.646828	0.275786
CCT2	Cct2	1 hr	0.149275	1.4481	0.0986604	0.048197	1.34959	1.3443	0.725524	0.918236	1.29044	1.02702	1.35322	0.711095	2.35093	0.779235	0	1.93355	0.768886	2.1252	0.50282	0.341534	1.75149	0.0854402
CCT3	Cct3	1 hr	0	0.131058	1.28059	0.778676	0.80108	1.02878	0.449905	0.564619	1.20168	0.611372	0.757245	0.651287	1.1326	0.738817	0.616848	0.196545	0.936613	0.963214	0.307006	0.891583	1.097	0.776508
CCT5	Cct5	1 hr	2.02509	0.0881488	0.172746	0.162949	0.556687	0.771028	0.190361	0.263898	1.00554	0.68195	0.73134	0.814578	0.928566	0.331595	0.319915	0.575351	0.410042	1.30536	0.299534	0.107767	0.603955	0.0865279
CCT7	Cct7	1 hr	0.812968	0.0570199	1.23492	0.260743	0.677434	0.8614	0.450716	1.98589	1.79357	0.864873	0.716574	0.874212	0.948361	0.285194	0.637638	0.873977	0.508252	1.45868	0.638952	0.175471	0.584278	1.10445
CCT8	Cct8	1 hr	0.0707677	0.833445	0.0804374	0.342198	0.950159	1.22079	0.252583	0.463531	1.66233	0.923306	1.08862	0.745494	1.33541	0.432182	1.70859	0.962724	0.975781	0.349527	0.374779	0.278451	0.678668	0.0696591
CCZ1	Ccz1	1 hr	0	0.739945	0.158532	4.67161	1.78954	1.29676	0.732917	0	1.99766	0.804764	0.828192	0	0.541976	0.22296	1.84303	0.773916	0.0659898	1.51738	0.456853	0.279188	2.54939	0
CD151	Cd151	1 hr	0	0.434257	0.361099	1.69927	1.11394	1.9432	1.54408	0.758338	0.373517	1.27162	1.29386	0.660918	1.90318	1.14535	1.25694	0.803825	0.628422	0.208473	1.65644	0.890616	0.821372	1.26606
CD164	Cd164	1 hr	0.162238	0.0437104	0.0786864	0.0850266	1.70229	0.831571	0.563064	0	0.600645	0.754321	0.931844	0.754321	1.00327	0.32235	1.52772	0.30785	0.329495	1.34512	0.158944	0.101078	0.285382	0.164632
CD164L2	Cd164l2	1 hr	4.22814	0.262917	9.98192	0	0	0.2969	0	0	0	0.112679	0.0715421	0	0	0.536566	0	0	3.61467	0.56876	0	4.09758	4.03319	0
CD200	Cd200	1 hr	1.64994	0.375494	0.18007	0.205196	1.34634	1.32889	0	0	1.81396	2.39814	1.16417	0	7.28864	1.20954	0	0	0.531136	0	1.8328	0.282668	0.0921287	0
CD209	Cd209a	1 hr	1.23081	1.67069	0.392566	2.09673	0.236566	0.0613733	0	0	0.271605	0.217596	0.439433	6.98963	1.77648	0.319141	2.00211	0.779329	2.68346	0.770848	0.708582	0.251965	0.158678	1.91819
CD274	Cd274	1 hr	0.958389	1.22463	1.34543	0.289981	0.102506	0.355749	0.283782	0	0.773485	0.197756	0.297692	1.83	0.389917	0.175682	0	0	0.247195	0.102204	0.0483806	0.0612317	0.107496	0.548817
CD2AP	Cd2ap	1 hr	0.0739254	0.940541	0.199868	0.329583	1.09924	1.31996	0.854644	0.350595	0.337054	1.11406	1.09924	0.192453	1.44369	0.639535	0.568393	0.407468	0.360288	0.925282	0.90864	0.717756	0.925954	0.350595
CD2BP2	Cd2bp2	1 hr	1.68563	1.47995	2.7262	2.62923	1.0195	1.12666	1.46026	3.74447	1.08312	1.473	0.866863	1.2952	1.83394	0.742177	0.36441	0.153021	1.9455	1.23529	2.19071	2.68907	1.72724	3.60171
CD300A	Cd300a	1 hr	13.8312	15.5426	5.56878	1.97474	0.301616	0.577876	0	0	0.396372	0.718007	1.34482	0.715338	6.11818	0.30473	0	7.14982	1.07434	3.38051	0.0787405	0.502249	2.9045	0
CD300LF	Cd300lf	1 hr	24.5357	13.6174	0.59589	18.5342	0	0.547456	0	0	0.998043	1.00832	0.955479	8.55382	3.15705	2.7593	0	81.7133	1.46477	1.34295	0.469667	0	13.8478	27.5504
CD300LG	Cd300lg	1 hr	0	11.0208	0	14.1139	0	0.0844167	0	0	4.00091	0.199194	0.40283	0	1.10186	0	5.17311	0	0.416159	0	0.236959	0.161428	0.251028	3.63584
CD320	Cd320	1 hr	0	0.0237364	5.98045	1.08601	0.738341	0.836359	0.84334	0	1.07931	0.539793	0.696733	0.11561	0.118682	0.130969	3.20162	0	0.0471935	0.088802	0.0494275	1.70204	0.629712	0.651215
CD36	Cd36	1 hr	2.72245	1.1171	0.529913	5.91985	0.194912	0.189365	0.169629	0	15.9171	0.226645	0.218518	11.6532	0.689222	0.0208972	0	1.50692	3.42083	1.41624	0.104615	0.295528	0.925928	1.26957
CD37	Cd37	1 hr	0.304464	1.4308	11.2223	5.34107	0.302679	0.700893	0	0	0.267411	0.889732	0.825893	2.2125	2.29777	5.34286	1.06071	1.69509	5.36786	0.999554	3.94955	0	0.0986607	0
CD38	Cd38	1 hr	11.5869	0.116279	0	6.87962	0	1.62244	0	0	19.2709	0.749658	2.75923	14.0958	1.38167	0.314637	3.93434	0	5.90698	3.06293	0	7.21888	0	3.19015
CD3EAP	Cd3eap	1 hr	1.25772	2.17143	2.82933	1.59702	0.319254	0.697238	0.544482	0	1.09028	0.451774	0.392667	0	1.106	0.826653	0.223628	0.235958	0.787216	0.448386	1.42629	1.98037	1.10751	0.341654
CD40	Cd40	1 hr	2.42205	0.313131	0.772508	7.45191	0.823013	1.54809	2.79798	4.8621	1.41282	1.48177	1.66755	1.40272	1.77031	0.891963	6.52921	3.49012	0.71805	3.12912	0.917435	0.495828	2.86737	8.24374
CD44	Cd44	1 hr	0.0322315	1.33196	0.957492	0.0125672	0.33233	0.841722	0.193333	0.52656	0.555229	1.06263	0.961195	0.214119	4.67971	1.62268	2.06736	2.67255	1.87122	0.754846	0.571022	0.72326	2.11685	0.52656
CD47	Cd47	1 hr	0.171907	0.506414	0	0.0555045	1.08234	1.06903	0.455085	0.654745	0.947666	1.57492	1.56309	0.431161	1.8728	1.38387	1.58214	0.576099	0.036713	0.0796029	0.769669	0.263168	0.958628	0.0983944
CD48	Cd48	1 hr	10.4186	0.994704	4.90221	0	0	0.349274	0	0	0.132069	0.261956	0.598132	0.332902	3.07689	0.971783	0	2.97756	1.75911	0	1.79694	0	0	0.411489
CD52	Cd52	1 hr	0	0.226868	4.69484	0	0	3.00267	0	0	0.715302	1.20107	0.405694	0	16.8843	8.85587	0	139.372	0.173488	0	2.16459	14.0845	0	0
CD53	Cd53	1 hr	2.58599	2.22175	2.32207	0.925542	0.215114	0.649074	0.196304	0	0.113155	0.669376	0.870756	0.739836	2.08083	2.12039	0	0.295875	1.1632	0.922258	0.908375	0.0325433	1.52789	0.168837
CD55	Cd55	1 hr	0	0.56395	0.156208	0.404035	0.224145	0.665258	0.289451	0	2.05905	0.84144	0.916793	0.0495176	1.78873	0.68906	0	1.44941	0.0376764	1.84782	0.0970018	0.0855195	0.472331	0.882346
CD63	Cd63	1 hr	0.05484	0.709974	0.5249	0.717096	1.69229	1.74692	1.04732	1.75815	0.869645	1.6079	1.22149	2.13233	1.59713	0.852757	2.13233	0.137866	1.09965	1.2368	1.47908	0.877626	2.01558	0.494905
CD69	Cd69	1 hr	0.792818	0.0988117	0	8.66869	1.61354	0.433609	0	0	0	0.374322	1.35895	0	0	0.348747	0	0	0.0755619	0	0	0	0.826531	0
CD7	Cd7	1 hr	0	1.38224	0	0	0	2.58464	0	115.263	0	0.917214	1.22552	0	3.82301	2.67456	0	19.8755	8.4656	20.6874	6.74679	1.04054	1.82672	45.0077
CD74	Cd74	1 hr	0.0206407	0.235956	0.163577	0.0327246	0.459868	1.4471	0.301796	1.07582	0.250754	0.523235	1.5369	0.545086	2.28151	1.12838	0.244142	0.182468	1.12454	1.6059	0.698909	0.187712	0.909696	0.277511
CD81	Cd81	1 hr	0	0.0575474	0.350105	0.105854	0.754326	1.37531	0.587261	0.561413	0.26191	1.40408	1.14716	0.639062	1.07968	0.74639	3.89401	0.490563	0.306028	1.13838	0.629464	0.288621	0.942207	0.0238062
CD82	Cd82	1 hr	4.74344	3.53721	7.41574	0.617453	0.574436	4.47078	1.13649	3.32299	0.999614	1.5117	0.88099	3.83203	1.09651	1.49605	0.967025	0.617019	2.21127	2.57866	5.62508	5.33048	4.2785	1.06675
CD83	Cd83	1 hr	0.806868	1.51358	0	0.43819	0.417262	0.482477	0.665788	0	0.336725	0.507329	0.496117	0.0773607	0.577589	1.10174	0	0	1.90188	0	0	0.986068	0.0633461	1.83909
CD9	Cd9	1 hr	0	0.0182552	0.0314207	0.0295884	0.422144	0.98792	0.32588	0.339113	0.30379	0.953276	1.39608	0.0803841	1.58189	0.384683	1.36144	0.309389	0.283804	2.46941	0.126633	0.0777374	0.448203	0.123172
CD93	Cd93	1 hr	0.343193	0.157343	0.2715	0.661709	0.567252	0.436459	0.314431	0.471051	1.16999	0.96929	1.18152	0.247971	2.3036	1.1982	1.44026	5.14607	0.914445	0.165342	0.353065	0.514322	0.401442	0.0992223
CDA	Cda	1 hr	0	0.103416	2.01415	0	0.312358	0.464316	0	5.29461	1.19667	0.446729	0.234269	0	0.410146	0.329946	0	0	0.395372	3.05042	0.124521	0	1.93606	0
CDC34	Cdc34	1 hr	0.14924	1.12482	0.120275	0.369139	1.09417	1.31602	1.90622	0	3.54423	1.65762	1.15301	1.93519	1.95584	1.12105	1.43252	5.40291	0.427978	1.86609	2.26783	2.07014	1.61709	4.2577
CDC37	Cdc37	1 hr	0.048914	1.9367	1.71415	2.03423	0.690594	1.12493	1.42472	0.904214	1.50796	1.41496	0.682313	1.07675	0.961903	1.42861	0.595634	0.122547	0.917121	0.589604	1.72565	1.99267	0.635635	1.2445
CDC37L1	Cdc37l1	1 hr	0.742587	0.326644	2.63802	0.0203676	1.00321	0.810618	0.511962	0.920007	2.43019	0.914465	1.01804	0.164119	0.605002	0.575905	2.49434	0.489862	0.0218225	2.56667	0.6129	0.259029	0.230972	0.427651
CDC42	Cdc42	1 hr	0.101882	0.630317	0.147615	0.554524	0.981078	1.13122	0.998608	0.570817	1.0563	1.13813	1.24774	1.45971	1.93529	0.538335	0.506729	2.33457	0.558391	1.42001	1.04955	1.19825	0.892086	1.44037
CDC42BPB	Cdc42bpb	1 hr	0.124029	0.891132	0.200673	1.03906	0.928875	1.18192	1.03544	0.529733	0.396795	1.24828	0.829097	0.906674	0.917387	1.04471	0.539712	0.960567	0.885743	0.616466	0.784697	1.00258	1.24452	0.877401
CDC42EP1	Cdc42ep1	1 hr	0	0.0922754	1.02331	0.178095	0.475883	0.888654	1.98996	2.37045	0.396898	1.81665	1.24515	0.0694913	1.89191	0.828807	1.35838	0.920323	0.286927	0.140957	1.35838	1.65579	2.2721	0.177108
CDC42EP3	Cdc42ep3	1 hr	0.42378	0.295799	0.303264	0.315498	0.746429	0.499	0.983758	0	1.33709	2.82104	0.807722	1.40948	0.691598	0.603078	2.9669	0	3.11238	0.803832	1.31187	0.105396	0.6421	0.1463
CDC42EP5	Cdc42ep5	1 hr	18.0722	0.393282	7.65963	5.13139	0	0.997919	0	0	1.38317	6.01962	5.26784	0	0	10.1477	0	0	0.1739	0	1.39655	0	3.63853	19.7363
CDC42SE1	Cdc42se1	1 hr	1.72623	1.61014	0.228084	0.664265	1.58326	1.78942	2.03488	0.997563	0.638225	2.44391	2.63269	1.41548	2.35491	3.02767	2.67694	0.329967	0.268449	1.77887	0.523461	0.954423	0.917612	1.24408
CDC42SE2	Cdc42se2	1 hr	0.0337945	0.737484	0.064715	0.0316142	0.745065	1.43523	0.80205	0.372929	0.49012	0.776779	2.5171	0.24558	0.967009	0.735205	0.878162	0.524559	0.267631	0.871919	0.600869	1.08033	1.10858	0.115556
CDC5L	Cdc5l	1 hr	0.422964	1.30832	1.55381	0.461352	0.869916	1.19693	0.706393	1.08041	1.98193	1.00367	0.976462	0.482883	0.912839	0.963342	1.69452	0.504483	1.06854	0.443525	1.15168	2.07072	0.71394	0.693759
CDCA7	Cdca7	1 hr	6.35833	0.187414	3.71208	14.1647	0	0.170918	0.332671	0	1.5378	0.258897	0.687338	2.67054	2.11608	3.15534	0	11.9074	0.585612	0.0838552	0	0.517336	1.52772	2.82862
CDCP1	Cdcp1	1 hr	0.0818673	1.70025	0.21115	0.341154	0.429623	0.521934	0.362521	0	0	0.924548	0.346796	0.193024	0.472958	0.806909	0	0	0.0378126	1.15166	0.140447	0.926949	0.783741	0
CDH16	Cdh16	1 hr	0.124752	0.0823725	0.16018	0.0990211	0.666126	2.2152	0.423246	0.148316	0.00364626	0.542464	0.723681	0.388116	0.324985	0.453396	0.0197531	0.719615	0.174034	0.682879	0.394331	0.316439	0.488391	0.143257
CDH5	Cdh5	1 hr	0.106756	0.535183	1.08868	1.42316	0.439503	0.272508	0.572515	3.04545	1.38982	0.774195	0.990515	0.267754	1.36459	0.697424	0.128366	0	1.07944	0.360462	0.266835	0.577161	0.428535	0.398551
CDHR2	Cdhr2	1 hr	1.5693	1.35329	2.39515	1.90798	2.01771	0.0908163	0.565879	0	0.0458676	0.0474756	0.0604166	0.789014	0.554393	0.192583	0	1.27013	2.08395	1.22518	0.378197	0.016693	1.08022	0
CDHR5	Cdhr5	1 hr	0	0.102062	0.372536	0	0.516317	0.122955	0.273745	0	0.050597	0.0537343	0.00834384	0	0	0.776778	0	0	0.558303	0.0212267	0	0.30178	0.435815	0.740065
CDIP1	Cdip1	1 hr	1.59183	0	0.0573432	0	0.363174	1.46848	0.911491	0	1.86766	1.3349	0.901267	0.0920159	0.17403	1.9879	0	0	2.67246	0.203368	2.21705	0.0900156	7.72845	0.251377
CDIPT	Cdipt	1 hr	1.58701	0.0605547	0.608212	0.420774	1.63883	1.31192	2.56995	0	1.03713	1.32865	1.4616	2.06537	1.66311	0.347486	5.16492	0.371175	0.189215	0.511384	0.388794	0.55358	2.67566	1.45716
CDK12	Cdk12	1 hr	0.430852	0.549087	0.423641	0.429696	1.02915	1.1029	0.867422	0.360613	0.571456	1.09037	1.14642	0.913442	1.38117	1.29996	0.1853	0.364734	0.436465	0.381973	0.980759	0.646089	1.00468	0.494763
CDK16	Cdk16	1 hr	0.146866	0.141771	1.2519	0.784526	0.947918	1.44996	1.66721	0	2.47174	0.855226	0.8574	0.528381	0.705005	1.20928	0.610574	1.14014	1.51606	1.78003	0.686181	0.851871	1.17729	0.920023
CDK2AP1	Cdk2ap1	1 hr	0.220304	0.382419	1.36966	0.867227	0.442566	0.98808	1.18768	0	1.72564	1.36966	1.79096	1.5701	1.09732	1.2965	2.01854	0.350668	1.94902	4.48147	0.690844	3.60641	1.43162	2.2664
CDK4	Cdk4	1 hr	6.12147	0.118611	0.927267	0.191288	0.936607	0.872759	1.02182	1.82523	1.25457	0.951194	0.844482	1.78493	1.0185	0.777563	1.81423	2.87111	1.86029	1.03027	0.205874	0.57847	0.174014	2.0732
CDK5	Cdk5	1 hr	0	0.986029	4.99842	0	1.33948	0.365116	3.19314	3.25191	0.734985	0.425176	0.483941	0.178885	2.04292	0.502088	0	0	0.32882	1.31701	0.902636	2.28014	0.587642	6.39882
CDK5RAP1	Cdk5rap1	1 hr	0.564687	2.56924	0.0388121	0.0281053	0.555892	0.717927	0.918106	0	1.17841	0.712192	0.714964	0.473775	0.441463	0.670799	0.519087	0.271493	0.0109936	0.371487	0.0499012	0.738194	0.263081	0.469377
CDK9	Cdk9	1 hr	0.239761	0.833358	0.676242	3.38391	0.588946	1.18724	1.66693	1.20359	0.477826	1.14303	0.914133	2.02677	1.08299	2.20962	1.04043	1.90539	3.11076	0.962955	2.49816	2.45504	2.41682	2.74414
CDKN1A	Cdkn1a	1 hr	1.44808	1.32215	0.274553	0.970948	0.629441	0.377468	1.10943	0.54463	0.0502766	0.577443	0.841961	0.779681	0.592595	0.827891	0.697526	3.81664	0.623243	0.974588	0.212962	0.299839	0.542072	1.15774
CDKN2AIPNL	Cdkn2aipnl	1 hr	0	2.23818	0	0.245311	0.928953	1.31307	0.505618	0	5.87978	0.625582	0.620584	2.93489	0.224164	0.11535	0	0	0.292605	0.581749	1.0097	0	0	0.43487
CDKN2D	Cdkn2d	1 hr	16.5679	6.66588	23.5151	0.901979	4.8803	1.19463	8.17861	0	6.55278	2.5377	1.58341	5.76956	5.57022	1.64279	0	7.69227	9.31527	0	11.7314	11.9138	0.479265	0
CDPF1	Cdpf1	1 hr	0	0.281293	0.27923	0.43879	1.61761	1.5	2.8205	8.3597	2.70633	1.04402	0.803989	3.40853	0.954608	0.799175	0	5.77029	0.878955	7.55089	0.220083	0.491747	11.3666	3.37689
CDR2	Cdr2	1 hr	0	6.93474	0.848665	7.92449	1.16412	1.2391	2.92246	3.20429	0.254505	1.45781	0.911105	2.25414	1.21117	1.96363	0.537483	0.192539	1.65442	0.650431	3.29819	5.71741	4.08943	7.39907
CDS1	Cds1	1 hr	0	1.51397	1.32524	0.767823	0.633949	0.964856	0.915195	0	0	0.876433	1.54394	0.113316	0.637417	0.649306	0	1.29007	0.738348	0.113316	1.43286	0.85476	1.45725	0
CDS2	Cds2	1 hr	0.280036	0.300658	0.0610691	0.891942	1.97195	0.856113	0.67242	0	0.739946	1.3331	0.907044	1.08734	1.04581	0.482963	1.21114	1.20538	0.167862	1.51676	1.0212	0.343848	0.43224	0.426859
CDV3	Cdv3	1 hr	0.0294595	1.08208	0.734616	1.88244	1.04803	1.48639	1.14208	0.576191	2.4427	1.80052	1.68571	1.27637	1.64912	1.43624	1.08921	0.917912	2.38422	1.28604	1.66091	0.787946	3.89745	0.899964
CDYL	Cdyl	1 hr	0.579549	0.801593	0.184012	0.229975	0.744706	0.764694	0.331853	0.808714	1.18192	1.16039	0.833476	0.330234	0.424668	0.993374	0.591768	0.256435	1.33623	1.42387	1.22626	0.801431	0.828216	0
CEBPA	Cebpa	1 hr	0	0	0	26.0719	2.22121	1.10542	4.10274	0	3.40494	2.03698	2.13025	15.0015	9.16581	4.17298	4.8109	0	2.78083	0.551561	4.29734	1.30003	6.02802	4.17989
CEBPB	Cebpb	1 hr	0	0.270467	0.611567	1.72483	0.261606	0.460004	0.441439	0	2.10407	1.29292	1.04457	1.33748	2.50602	0.701526	0.493422	0.578318	0.17055	0.0772159	0.31494	0.711146	1.31866	0
CEBPG	Cebpg	1 hr	0.845683	1.15965	1.40188	4.87552	0.855991	1.11541	1.67003	0	4.52319	1.23252	1.22035	0.969522	0.577103	1.62308	3.25689	4.04946	2.26818	0.172802	1.34977	0.535298	0.101791	1.05614
CELF2	Celf2	1 hr	0.818175	1.13529	2.48658	0.366361	0.32491	0.256795	0.381077	1.0392	1.26263	0.939616	0.719172	3.09225	0.596348	1.30182	0.907926	1.56649	1.98261	1.1656	0.525101	0.880607	2.17945	0.169886
CELSR1	Celsr1	1 hr	0.825003	0.568787	1.17155	0.298024	1.47611	0.727096	0.989414	0.260694	0.00957026	0.46327	0.645836	0.594435	0.605316	0.675312	0.201729	0.304636	0.62912	0.719173	0.575503	0.570956	0.739102	0.351884
CENPB	Cenpb	1 hr	0.242608	5.85119	8.91237	3.49277	1.07799	2.05436	1.58934	2.94746	1.65576	2.09369	1.29205	3.22979	1.34937	2.06584	2.13209	1.12594	4.60028	2.59998	8.38294	4.39418	16.4635	5.96421
CENPF	Cenpf	1 hr	0.589153	1.50653	2.18537	0.886326	0.124262	0.746328	0.0711746	0	0.103178	0.532577	0.770483	0.0609743	1.17182	0.609932	0.271389	0	0.982148	0.324438	0.598405	0.405092	1.87989	0.186184
CENPJ	Cenpj	1 hr	1.09933	0.784806	1.99157	1.51004	1.22712	0.720079	0.458319	0	0.646954	0.967104	0.846364	0.323319	0.729982	0.97257	0.886769	1.49609	1.05061	0.30787	0.700907	0.546813	0.140863	1.95568
CENPO	Cenpo	1 hr	2.31986	1.89969	0.0473727	0.174439	0.281903	0.450041	0.282369	0	0.576057	0.516549	0.54887	0.0483062	0.446774	0.653767	0	0	0.909183	0.106764	0.136517	0.0254366	0.116448	0
CENPV	Cenpv	1 hr	0	0.0640704	0.468844	0	1.96432	0.636935	4.36055	0	4.53995	0.695729	0.41005	6.4108	0	1.07789	27.6746	5.3299	0	7.23166	0.393467	0.538945	0.0994975	1.75779
CENPW	Cenpw	1 hr	3.1829	0.169095	0	0	0.666028	2.63535	0.835123	0	1.39992	1.02952	0.840874	0	2.47431	1.04793	13.5299	14.6963	1.47009	0	0.932899	0	0.571702	0
CEP162	Cep162	1 hr	0.0931628	0.344318	0.169349	0.707682	1.4143	1.25045	0.309419	0.591155	0.458184	0.947303	1.20573	0.188928	1.24542	0.829829	0.662077	0.566016	0.319474	0.730929	1.39443	1.11346	0.271444	0
CEP164	Cep164	1 hr	2.77503	2.36738	1.43578	1.45311	0.984964	1.04809	1.15144	0.208825	0.209181	1.06442	0.729132	0.509077	0.718306	1.53794	0.994888	0.954481	0.761514	0.270742	1.64161	1.92055	0.644828	1.91599
CEP170	Cep170	1 hr	4.23017	0.703807	2.58648	2.12872	0	1.54629	0	0	3.34529	2.67204	3.81829	0	0	3.16036	0	0	4.5125	0	1.03841	1.21516	1.24186	0.693559
CEP170B	Cep170b	1 hr	0.124995	0.908885	1.59046	0.91426	0.679738	1.09749	1.66292	2.39202	0.172797	0.942573	0.750732	0.703565	0.740829	1.62455	0.317555	0.0530493	0.700899	0.506582	0.84041	0.800544	1.12701	0.522347
CEP85	Cep85	1 hr	0.759083	2.87344	0.129404	1.81591	1.12044	1.1462	0.999857	0.745706	6.51448	0.687544	0.495024	0.0410208	0.80159	0.792078	1.53471	0.969042	1.00848	0.562302	0.934164	1.35864	0.64692	1.60546
CEPT1	Cept1	1 hr	2.77429	0.0757111	0.529978	0.719904	2.1573	1.88834	1.07088	0	1.44166	1.37613	1.32171	0.0766367	2.07937	1.21527	0	0.761739	0.799317	0.490549	0.216582	0.0403546	0.417429	1.36558
CERK	Cerk	1 hr	0.185674	1.12207	0.97362	0.952196	1.24078	1.05838	0.947455	1.39127	1.00377	1.50922	1.33718	1.53644	0.955357	1.96767	2.6355	1.65568	1.5523	1.19289	1.54891	1.05633	0.343135	0.866851
CERS2	Cers2	1 hr	0.932705	4.66653	6.70968	4.09909	2.15448	1.02101	3.32526	3.37415	0.204761	0.614078	0.73771	2.82432	0.826768	1.12548	0.724505	0.386346	2.92166	1.25294	2.57581	3.31098	15.9776	5.02673
CES1	Ces1d	1 hr	14.3603	5.60641	4.4335	6.73954	0.626019	0.517056	0	0	1.3784	2.61304	0.960365	0.981494	0.575059	1.10662	0	0	0.315288	0	0.216268	0.696036	1.14017	2.03425
CES2	Ces2b	1 hr	0.251369	0.380526	0.467727	0.124827	1.84982	0.543371	0.999991	0.401138	0.538703	0.580349	0.438679	1.46606	0.188632	0.598909	0.605152	0.623346	0.33812	0.434433	0.38286	0.194087	2.74557	0.455635
CETN2	Cetn2	1 hr	0.748552	0	0	0.0608071	1.63283	1.55425	0.0985401	0	0.937896	1.26636	1.27179	1.27763	1.68794	0.491886	1.51923	0.671593	0.042755	0.251915	0.158804	0.410584	0.795651	0.153511
CFAP69	Cfap69	1 hr	0.677308	0.272911	0.0584705	0.166195	1.90173	0.863089	0.434929	3.03096	0.326197	0.833421	1.243	0	0.551438	0.755077	0.342182	5.33796	0.858624	0.173827	0.0751764	1.31804	0.143728	0.162882
CFB	Cfb	1 hr	1.11966	1.49051	1.50545	2.71558	0	2.40778	0	0	0.280456	0.991458	1.5254	0	0	1.42066	0	0	2.39635	0	1.41655	2.11119	0.132832	1.10636
CFL1	Cfl1	1 hr	0.665816	0.795227	0.136649	0.216528	1.11435	1.78766	0.773705	0	0.49533	1.40556	1.18344	0.606282	2.30805	1.20321	1.05591	0.80844	1.57653	1.72001	1.23501	1.20933	2.36416	0.701986
CFL2	Cfl2	1 hr	0.28182	0	0.624478	1.22319	0.399559	0.902541	4.99225	0	26.7101	0.957295	0.866933	0.730228	0.318681	0.713587	12.9535	0	0.0116307	0.270726	0.568114	0	0.706609	1.53793
CFP	Cfp	1 hr	0	0.109756	0.46441	2.90368	0.331508	0.75112	0.542061	0	0.386013	0.396466	0.231458	0.683176	2.30786	0.426332	0	61.6419	0	0	1.20134	0.302389	0	1.74116
CGGBP1	Cggbp1	1 hr	0.0763233	0.282081	0.0852398	0.423728	0.501699	1.03868	0.540175	1.15178	1.37876	1.156	1.53727	0.0443402	1.58292	0.594886	0.434728	1.32555	0.435891	1.27196	0.846099	0.833015	1.73489	0.357484
CGNL1	Cgnl1	1 hr	0.0144362	0.865164	0.382194	0.546058	0.994199	1.73913	0.621806	0.301479	0.0157207	0.48784	0.383675	0.462099	0.48784	0.430546	0.0681699	0.589033	0.388627	0.287282	1.38282	0.615901	0.53266	0.313105
CGREF1	Cgref1	1 hr	28.1367	0.0560332	7.21342	0.893863	0.735293	0.365931	3.66084	2.86875	0.665537	0.620177	0.319427	4.27873	0	1.26475	0	2.61221	2.27258	0.853458	0.198975	0.0830969	1.049	0.431113
CHAC2	Chac2	1 hr	0	2.67975	5.17489	0	0.507843	0.421606	0.840017	0	2.30094	0.267017	0.347505	0	0.454823	1.2974	0	0	0.107957	0	0	0	0.454184	0
CHCHD2	Chchd2	1 hr	0	0.0201106	0.490712	0.0121882	0.987789	1.16939	0.277689	0	2.55926	0.550841	0.548742	0.637377	1.22729	0.510823	0.484618	0	1.21165	0.418328	0.0792236	0.0484144	0.638867	0.0765828
CHCHD4	Chchd4	1 hr	1.31139	1.15667	4.73738	0.331846	0.641973	0.765627	0.416033	0	1.90805	0.364423	0.345974	0.578687	0.288643	0.53957	2.47168	3.54381	0.441138	0.261436	0.0206674	0.353214	0.1588	0.272296
CHD3	Chd3	1 hr	2.53653	2.60549	2.89254	2.83838	0.465314	1.24931	1.07206	1.89925	0.140935	1.63619	0.917668	1.93682	1.15852	2.79553	1.93682	2.04372	4.60309	2.0794	4.60309	3.70565	4.0991	3.41506
CHD4	Chd4	1 hr	0.166374	1.02251	0.363185	0.609337	1.13825	1.51321	0.777706	0.574644	0.572618	1.52576	1.24147	0.770887	1.21784	1.0664	0.597993	0.146808	0.769681	0.492201	1.2327	0.860353	0.905934	0.762263
CHD7	Chd7	1 hr	1.53377	1.28903	0.714833	1.48747	0.609824	0.777668	0.744395	0.348881	0.399925	0.645657	0.671729	0.57058	0.643256	0.873817	0.105999	0.211989	0.536467	0.533197	1.01888	1.2653	0.91497	0.579311
CHD8	Chd8	1 hr	0.941542	1.62902	1.38225	0.515334	1.06411	1.34585	0.987597	0.386675	0.732009	1.0889	1.22982	0.68954	1.18205	1.0958	0.294089	1.02949	1.04652	1.15496	1.01834	1.40606	0.610428	1.04938
CHERP	Cherp	1 hr	0.515831	1.04209	1.94491	0.164176	0.713948	0.875169	0.6833	0.421901	1.07683	0.862209	0.721125	0.473869	0.984887	0.974586	0.489742	1.58211	0.907295	0.320795	1.03631	0.725684	0.944444	0.846082
CHI3L1	Chil1	1 hr	1.03341	0.0621965	0.474913	0.0208092	0	0.0317919	0.0839306	1.76821	0	1.30532	0.0328324	0.471792	0	0.105318	0	1.08173	1.46462	0	0.0369942	0.0252023	0.829827	0
CHIA	Chil3	1 hr	6.10769	0	0.527635	1.92479	0	0.122507	0.413675	0	0	0.0358974	0.0296296	1.34986	0	0.17094	0	12.9726	0.433618	0	0	0	1.56809	1.32877
CHKA	Chka	1 hr	1.96193	0.0569413	2.13276	0.532263	2.73403	1.57033	1.28509	0.930958	0.876874	1.11872	1.40173	0.71674	0.720445	1.53477	1.09215	0.209772	0.0594814	0.0506968	0.522738	0.817287	0.188181	0.119704
CHMP1A	Chmp1a	1 hr	0.181353	1.06618	0.119862	0.46155	1.10409	0.957609	1.48551	1.01607	0.904561	1.25157	1.03277	1.19568	1.45403	2.53141	0.572326	1.83372	0.993953	0.0439615	1.9712	3.43139	0.865923	3.55712
CHMP2A	Chmp2a	1 hr	0	0.175349	0.895181	0	0.933093	1.14151	0.401443	0.314584	1.40944	0.722172	0.576876	0.939112	0.82734	0.757618	0.740773	0.206824	0.633975	0.851834	0.81016	1.13097	0.653161	0.891753
CHMP4B	Chmp4b	1 hr	0.0432667	0.613077	0.368727	0.425814	0.72307	1.51256	0.630398	0.846242	2.08204	1.23881	1.20872	0.455788	1.7434	0.689368	1.08626	0.214714	1.1839	1.53369	1.41903	1.20785	2.84159	0.323653
CHORDC1	Chordc1	1 hr	0	0.31373	0.0906441	0.229547	0.521742	0.817461	0.236888	9.08477	1.36289	1.0754	1.65518	0	1.33382	0.594864	0.610428	0	0.36982	2.63406	0.651541	0.0396446	1.3809	0.355333
CHP1	Chp1	1 hr	0	0.0409464	0.277609	0	1.44323	1.43002	0.608568	0	1.16901	1.56343	0.916729	1.90944	0.702349	0.626716	0.455292	2.09487	2.06024	1.61557	0.755183	0.0232585	1.08827	0
CHPF	Chpf	1 hr	3.16763	0.19784	0.183642	0.840742	0.710032	1.55495	1.10634	0	0.304851	1.32725	1.11678	1.94478	0.986277	0.164954	6.24538	0	1.51789	0.0331995	2.96238	0.471997	2.05597	0
CHPF2	Chpf2	1 hr	0.567694	0.775553	0.571456	0.348283	1.50758	1.34602	2.06865	1.7527	0.458167	1.8084	1.49119	0.922783	1.32919	1.18903	2.48437	1.39985	1.60251	0.135498	1.8727	1.82112	1.48009	3.74496
CHRAC1	Chrac1	1 hr	0.793793	0	2.41775	0.364489	0.667893	1.00409	0.112844	0	2.42614	0.899487	0.613802	0.770323	1.73012	0.515725	0.369307	0	2.16579	0	0.250091	0.470183	0.276359	0.175794
CHRNA4	Chrna4	1 hr	26.4749	1.10427	3.64305	0.449204	3.86905	0.0266993	2.73199	0	0	0.0337254	0.0227178	2.20456	0	0.702613	0	0.96375	0.131623	2.57133	1.42513	0.264417	0.1164	2.30504
CHRNA7	Chrna7	1 hr	60.4973	4.39521	65.9651	0	0	1.32534	0	0	3.69247	0.203425	0.320548	0	0	0	0	0	0	0	71.3219	2.49658	1.36233	0
CHST10	Chst10	1 hr	1.06783	2.62519	2.44023	3.93745	0.760907	0.375653	0.407659	0	1.04964	0.352911	0.299006	2.03897	0.502667	0.316694	3.41457	0	0.128194	0.154136	0.0879331	0.036723	0.0222359	0.190522
CHST12	Chst12	1 hr	1.19462	0.981287	0.0603509	3.11766	1.11766	1.24444	0.959298	8.31556	1.15485	1.03813	1.04491	0.554152	0.651462	2.0545	2.61825	1.15743	3.10199	0.353918	1.55696	1.23439	4.43275	4.99041
CHST14	Chst14	1 hr	1.76887	0.15863	0.112238	0	0.433239	1.09844	0.983954	0	1.23387	1.41196	1.10367	5.71142	2.48645	0.350931	0	3.70236	0	0	0	0.303043	0.532009	0
CHST7	Chst7	1 hr	0	0.605238	0.561801	0.278505	0.200894	0.414883	1.30981	0	0.637177	1.98659	0.740339	1.58288	0	0.456723	0	0	0.179495	0	0.16672	2.4663	4.21878	0.74481
CHTF8	Chtf8	1 hr	1.20698	6.30007	8.51871	8.35921	1.6709	1.0192	1.48378	2.95101	0.779968	1.22496	1.12915	2.43855	1.25654	1.46143	1.54963	0.981289	3.44589	1.61192	3.14108	6.00752	3.39586	6.58428
CHURC1	Churc1	1 hr	0.860345	0.0149316	0.0412397	1.42917	1.65985	0.802345	0.862478	2.35046	3.11288	1.38661	1.39504	0.41453	1.8956	0.892138	3.43833	0.852219	2.69368	0.817886	0.439721	0.536014	3.63651	0
CIAPIN1	Ciapin1	1 hr	0.213613	1.72489	3.09227	0.934951	1.03311	1.91489	1.0755	0	1.16864	1.20434	1.0201	1.0835	0.878992	1.12979	1.12365	0.589155	0.375728	1.49696	1.13127	0.562384	0.51163	0.674861
CIART	Ciart	1 hr	0.330729	0.345762	0.196886	6.8231	0.963576	0.465542	0.910232	0	4.79654	0.533434	0.554286	1.97904	0.159545	0.0785603	1.39469	0.961151	0.112021	0.232286	0.155181	0.105717	1.33455	7.85748
CIB1	Cib1	1 hr	0.0871813	0.195455	0.0329806	0.299766	1.72343	2.07714	2.2864	2.77676	0.694766	0.77415	0.758938	0.97574	0.526028	1.26438	0.414814	5.96348	0.762133	0.19341	0.205681	0.987117	0.74935	1.57169
CIC	Cic	1 hr	0.426417	0.802712	1.12275	0.524017	0.669319	0.869327	1.31024	0.327801	0.443555	0.871264	0.835132	0.668335	1.1778	1.28374	1.05541	0.147142	0.22486	1.09177	0.745182	0.992053	0.946949	0.644467
CIDEB	Cideb	1 hr	0.964873	1.83177	0.0262431	0.0783795	1.18986	0.285525	0.230065	0	0.357257	0.341686	0.287625	0.160083	0.487248	0.0283426	0.625812	0	1.36324	3.27987	0.204697	0.790968	0	2.15106
CINP	Cinp	1 hr	0	0.644725	1.47161	0.808752	1.35987	0.619003	0.791464	0	2.97147	0.551537	0.961394	0.678036	0.542682	1.6816	0	0	0.538887	1.11741	0	0.30149	2.75305	0
CIPC	Cipc	1 hr	0.324473	0.381599	0.580449	1.47973	0.842155	1.01917	0.726448	0	4.727	0.738273	1.05856	0.0832331	0.802676	0.567441	0.762925	0.910925	0.542334	0.168831	0.339482	1.50556	1.28325	0.895279
CIR1	Cir1	1 hr	0	2.02322	2.03431	2.12488	1.85352	1.41144	0.543307	2.02689	1.60826	1.44436	1.38961	0.725291	1.162	0.790443	0.826857	0.463998	1.23986	1.27235	1.92319	1.85923	0.804599	1.04849
CIRBP	Cirbp	1 hr	0.423668	0.932379	0.672286	2.41824	1.87807	1.5083	2.19696	3.53701	0.826679	1.83663	1.52573	1.64414	1.58328	2.09892	1.94382	0.59824	1.13981	2.36115	1.86908	1.82844	0.808618	1.42483
CISD2	Cisd2	1 hr	0	0.329827	0.841362	0.0779748	0.68402	0.5594	0.525634	0	1.15552	0.639115	0.670792	0.0720571	0.649036	0.181187	1.43192	0	1.99497	8.73022	0.280048	0.0379431	1.91787	0
CISD3	Cisd3	1 hr	0	0.817157	0.137445	2.07604	0	0.816715	0	0	1.66879	1.1769	0.785779	0	0	2.34408	0	0	0.728105	0	2.32905	0.0481721	2.08488	0.802131
CISH	Cish	1 hr	1.44539	0.486412	0.140581	0.899907	1.32091	1.41514	1.25737	2.73375	0.405294	0.451746	0.978422	1.15053	1.22782	0.949844	0.255973	0.0973217	0.140581	0.349857	0.434412	0.259115	0.389483	0
CIT	Cit	1 hr	1.96151	1.20011	0.374505	0.803449	1.11334	1.51998	0.499164	0.475468	0.0689093	0.455453	1.22014	0.354935	0.959039	0.99067	0.0941712	0.405437	0.164858	0.192447	1.60176	1.4059	0.315223	0.424035
CITED2	Cited2	1 hr	0.0304185	0.210298	0.248923	1.1749	0.83477	0.79106	1.24439	0.723755	1.19783	0.779329	1.32981	0.142459	1.50152	0.428758	0	0.305657	0.265917	0.50864	0.675898	0.710866	0.291206	0.438972
CITED4	Cited4	1 hr	0	0	0.0446355	0.18985	0.775467	1.30693	2.19904	0	2.32581	0.702562	0.446355	0.272276	1.96783	1.75447	0	8.5105	0.718631	0.666259	1.11053	0	0.147892	7.34551
CIZ1	Ciz1	1 hr	0.121567	0.554874	0.566871	0.530029	1.00928	1.25804	1.28936	0.765905	1.52186	1.45199	0.940229	1.44664	0.787921	1.87698	1.46862	1.12198	2.43864	1.09192	1.46862	1.34777	1.0196	1.27869
CKAP2L	Ckap2l	1 hr	2.32847	1.11868	8.77721	0.556376	0	0.335249	0	0	0	0.190995	0.579627	0	1.12177	0.633723	0	0.47025	2.13416	0.921994	0.495637	0.543564	0.0804313	0
CKAP4	Ckap4	1 hr	0.0650047	0.145736	0.848206	0.479338	0.931034	2.03411	1.11185	0	0.885379	2.26411	1.67716	1.24176	2.03087	0.867364	0.855069	0	0.0402228	1.78687	2.65347	2.27602	0.317779	0.107801
CKB	Ckb	1 hr	0.0557697	0.696698	0.0985001	0.192936	0.240775	1.01709	0.592327	0	0.193754	0.449121	0.279441	0.21543	0.0999959	0.462273	1.54284	0.218337	0.00476977	0.0258245	0.249693	0.194799	0.111455	0.565656
CKLF	Cklf	1 hr	0	0.233802	0	0	0	1.48258	0	0	2.81112	1.5541	0.671149	0	10.257	2.18399	0	9.60513	0	9.50061	1.43582	0	1.95568	0
CKMT1B	Ckmt1	1 hr	0	3.38163	0.235928	1.3671	0.469112	0.492888	0	0	0.245072	0.658403	0.0621825	0	0.788254	0.210323	0	0	0.695895	0.167344	2.40134	2.095	0	1.03424
CKS1B	Cks1b	1 hr	0	1.32289	0.28091	0	0.630414	0.657634	0	8.19429	3.05952	0.436608	0.592306	0	0	1.13344	0	0	3.58759	0	1.75188	0	6.38253	0
CKS2	Cks2	1 hr	0	0.596306	2.56456	0	1.54544	1.30779	0	0	0.873319	1.04973	2.0776	0	1.47254	0.335331	0	0	4.17415	0	0	0	0	0
CLASP1	Clasp1	1 hr	0.163264	0.391385	0.228632	0.62199	0.808359	1.16544	0.649496	0.137457	1.54888	1.13529	1.39115	0.357724	0.709732	0.852449	2.32408	0.359843	1.14557	0.597297	0.565773	0.276868	0.462762	0.834276
CLCC1	Clcc1	1 hr	0.453996	0.468575	0.496133	0	1.22918	1.06676	0.990933	0	2.03476	1.37488	1.41488	0.440572	1.06356	1.31896	0.679083	0.337541	0.145346	1.13903	0.737666	1.01342	1.91457	0.207307
CLCN5	Clcn5	1 hr	0.765293	0.113607	0.26542	0.218126	1.51164	0.835631	0.170299	0	0.132023	0.259768	0.453125	0.653873	0.168952	0.321495	0.156988	0.124127	0.0179247	0.468244	0.221338	0.023563	0.185264	0
CLCN7	Clcn7	1 hr	1.04613	1.06216	1.06835	0.858167	0.797466	0.97669	1.96703	0.983905	0.355499	0.777386	0.673682	1.65684	0.344056	0.985042	0.391963	0.607899	0.117102	0.625349	1.58587	0.916309	1.52901	1.20766
CLCNKA	Clcnkb	1 hr	0.0334425	0.424651	0.39724	0.21767	0.2187	0.880587	0.443824	0.542876	0.0131416	0.398907	0.409499	0.77717	0.0208403	0.391993	0	0.850724	0.979737	0.129945	1.6757	0.0553615	0.766235	0.114352
CLDN10	Cldn10	1 hr	0	0.17513	0.0238435	0.0271705	1.12684	1.53495	1.03017	1.73475	0.0417723	0.450254	1.27313	0.705417	0.824819	0.132156	0	0	0.0291113	0.139826	0.293423	0.0660779	0.663367	0.794322
CLDN15	Cldn15	1 hr	0.713423	0.0665861	1.58085	0.202929	1.56364	1.67417	1.85762	0	0.770497	1.31134	1.17183	4.66737	2.96104	5.78348	0	0	0.191152	4.34576	1.96089	0.183452	0.322059	1.64427
CLDN18	Cldn18	1 hr	0.831644	0.139789	0.196941	3.97229	0.152003	0.0171908	0	0	0	0.0280482	0.0260878	0.747348	0.0496121	0.45239	0	0.998576	0.150495	0.0722316	0.0482549	0.10782	0.789421	0
CLDN19	Cldn19	1 hr	0.40189	0.213508	0.0169004	0.264209	0.0895719	3.46153	0	0	0	0.395694	1.91864	0	0.726602	0.520643	0.267702	0.84682	0.227704	1.28488	2.7658	0.777641	0.660466	2.78123
CLDN23	Cldn23	1 hr	10.7103	0.386036	1.19225	2.31371	1.69114	0.767074	0.302332	0	0.449334	0.686285	0.271099	1.33009	0.535952	0.0957801	0	17.6685	0	0	0.869933	1.25972	0.939062	0
CLDN3	Cldn3	1 hr	0.720831	1.36847	2.79915	0	1.66621	0.981585	0.536016	0	0	1.28743	0.720962	0.210172	0.563333	0.917148	0	0	0	2.16223	0.106001	0.590912	0	0
CLDN7	Cldn7	1 hr	0.091973	1.48505	2.24309	3.25641	0.884936	1.93642	3.11508	0	0	2.23473	1.40872	1.14696	1.32902	1.67803	0.320422	1.07171	0.728367	1.66644	1.34521	2.23203	1.27238	3.02176
CLDN8	Cldn8	1 hr	0.230874	0.615859	0.0175259	0.174674	0.260902	0.617144	0.282751	0	0	0.549962	0.18297	0	0	0.465954	0.336029	1.00587	0.0197458	4.40168	0	0	0	0.132145
CLEC12A	Clec12a	1 hr	1.41739	5.36973	8.29776	0	0.26325	1.17064	0	0	0.192237	0.144895	1.07595	0	4.40281	0.746712	0	3.35985	6.85168	0.656332	0.581733	0.156372	2.39149	0
CLEC2D	Clec2d	1 hr	0.209073	0.07544	0.015871	0	0.639706	0.92242	0.491048	0	0.605953	1.29528	1.11044	0.80762	1.32702	3.67296	0.411693	0.936387	0.0594632	0.127708	0.877982	0.478351	0.620237	0.119667
CLEC3B	Clec3b	1 hr	0.477773	0.0720611	0.467459	0.0393791	0.971217	0.464513	0.700653	6.24855	1.58427	1.58588	0.0667034	0.546619	1.50458	0.401828	2.03151	0	1.27942	0	0.734139	0.0291995	0.182162	0
CLEC4A	Clec4a1	1 hr	0	0	0	0.727273	0.832792	0.980519	2.13474	30.4724	2.76136	0.706169	1.1461	0	2.08929	0	0	0	3.28084	0	0.847403	0.657468	0.214286	0
CLEC4D	Clec4d	1 hr	51.3822	0	0.78534	4.56545	0	0	0	0	0	0	0.136126	0	18.0052	2.4555	0	0	2.94241	0	0	3.74346	0	0
CLEC5A	Clec5a	1 hr	0.379089	1.38871	0.0240539	0.455741	0.0711995	0.153945	0	0	0	0.118666	0.504971	0.379891	2.64753	0.166934	0	0.659878	0.956062	0.424952	0.0283836	0.269403	0.0211674	0
CLIC1	Clic1	1 hr	2.15859	0.689419	0.45338	0.1721	0	1.74571	0	0	0.287547	1.46586	1.9923	0	0	1.00672	0	0	1.38653	0.0162013	0.804	1.53785	2.56953	0.375839
CLIC4	Clic4	1 hr	0.218289	0.0596992	0.199327	0.00335284	2.33939	0.386154	0.430263	0.206218	0.281862	0.982234	0.957442	1.08042	1.30327	0.553145	2.94136	1.11514	0.940025	1.56032	0.0806359	0.444792	0.291064	0.160098
CLIP2	Clip2	1 hr	1.05183	3.27726	2.44078	3.25015	0.373923	1.30348	1.59339	0	0.248853	1.95108	1.85878	1.78528	2.25088	1.99689	1.96728	0.778589	2.94701	2.08056	2.97397	3.4258	2.41771	1.34484
CLK1	Clk1	1 hr	0.182411	0.423897	0.966028	0.646998	1.98738	1.34564	1.56593	0.647345	1.04718	1.88382	2.17773	1.53512	1.60135	1.49122	2.03029	1.49347	0.323295	0.891505	0.735377	0.753437	0.420877	1.18205
CLK3	Clk3	1 hr	0.975694	4.14206	1.24465	1.96981	0.755256	1.43225	1.32994	3.91473	0.973866	0.919302	0.685081	1.57977	1.02808	2.29875	3.25546	0.85208	0.303621	1.84563	2.9858	1.98704	0.774804	3.93351
CLK4	Clk4	1 hr	0.600314	0.620946	0.889058	0.0466097	1.72622	1.48365	1.3419	0.470159	1.72493	1.62225	1.70954	1.31346	0.804872	1.54817	0.566532	0.807705	0.258438	2.29734	1.38391	0.450436	0.038004	1.19769
CLN3	Cln3	1 hr	0.651441	0.416761	0.0471185	0.0328734	1.66778	1.31402	1.25869	0	0.533279	0.761384	1.10381	0.905114	0.21733	1.45994	1.03186	3.82847	0.601765	0.408908	1.41812	1.53902	0.248377	0.206554
CLN5	Cln5	1 hr	0.150713	0.0389571	0.0196753	0	0.995045	1.50201	1.32362	3.57211	0.585143	0.795013	1.24164	0.120019	0.502244	0.663975	0	0	0.265092	0.99675	0.0232168	0.0285947	0.130906	0
CLN6	Cln6	1 hr	4.43657	0.0562633	1.48116	0.0477707	2.15897	1.16561	3.2224	0	0.977707	0.822983	1.24841	0.847665	1.73487	1.52893	0.8612	0	2.70117	1.26433	0.215234	1.83174	0.188694	0
CLP1	Clp1	1 hr	0	1.50234	0	0.084375	1.19484	0.945	1.13438	0	2.36344	0.934219	0.667969	0.194063	1.10531	1.17891	0	0	0.467813	0	0.0829688	0.102188	0	2.30156
CLPP	Clpp	1 hr	0	1.29705	0.637939	1.12057	0.442747	0.551039	0.161769	1.67696	3.16095	0.65064	0.735981	1.29861	0.209007	1.09628	4.47738	0.982199	1.60855	0.150628	0	1.00738	0.613206	0.519621
CLPTM1	Clptm1	1 hr	0.351866	0.18473	0.544947	0.0332313	1.31767	0.790265	0.621603	1.68855	0.64441	0.514739	0.489686	0.929295	0.517791	0.61331	0.350368	0.156682	0.0581979	1.42658	0.529828	0.348093	0.449976	0.354054
CLPTM1L	Clptm1l	1 hr	2.48529	0.421343	0.181775	0.859712	0.18801	2.11095	0.105116	0	0.893046	1.36179	1.27602	0	0	1.5944	0	0	0.916227	0	1.26147	0.617266	5.26155	2.71631
CLPX	Clpx	1 hr	0.179607	0.137664	0.538822	0.0225579	1.12125	0.922105	0.587362	0.4429	2.41853	0.788671	0.993807	0.655992	0.407351	0.723011	0.670493	0	0.83147	0.19567	0.105186	0.152316	0.167875	0.0569486
CLTA	Clta	1 hr	0.0332186	0.565836	0.271837	0.114219	0.801533	1.20108	0.921256	0	0.753458	1.08754	0.832024	0.679471	1.11487	0.537537	0.620633	0.214703	0.871574	0.392194	0.640505	1.06192	1.79283	0.0550883
CLTB	Cltb	1 hr	0.196262	1.144	1.06194	1.08658	1.04731	1.59321	1.69788	0.602721	2.95767	1.21952	0.773545	0.466755	1.15685	1.30481	2.19841	0.140825	1.10374	0.982353	1.83038	1.83082	3.11015	0.488028
CLTC	Cltc	1 hr	0.0253777	0.244486	0.187213	0.130389	0.953603	0.759261	0.515587	0.244194	0.352962	0.674925	0.891393	0.636464	1.15418	0.319523	0.692897	0.549929	0.687945	1.04977	0.365099	0.278081	0.7532	0.10536
CLU	Clu	1 hr	0.0292303	0.590956	0.186992	0.16429	2.53483	2.41142	0.577191	2.95922	0.222951	2.57634	3.04444	1.27426	0.777694	0.914888	1.5477	0.675235	0.273616	6.83537	0.443684	0.311308	0.611925	0.409436
CLUH	Cluh	1 hr	0.924361	0.717131	1.03716	0.592001	0.956984	0.811219	1.66594	0.366008	0.833173	0.447116	0.481627	0.707636	0.38394	0.980974	0.0768727	0.427702	0.772033	0.193305	0.665372	0.772261	0.867424	0.474347
CLYBL	Clybl	1 hr	0.0831516	1.20777	0.883577	0.0219462	1.80276	0.903207	0.705325	0	1.02452	0.396006	0.508663	0.11156	0.0791281	0.17435	1.32774	3.20182	0.0685208	1.88359	0.14265	0.0265792	0.967094	0.284325
CMBL	Cmbl	1 hr	0.0339917	0.277739	0.249661	0.0322651	1.67245	0.152455	0.316738	0	1.35645	0.1146	0.0879467	0.146153	0.0907739	0.186274	0.112507	0.275732	0.233733	0.379757	0.227474	0.131542	0.32155	0.133226
CMC1	Cmc1	1 hr	2.17778	0.124367	0	0.0893979	1.51095	1.24731	0.918305	0	1.53314	0.57683	1.00436	0	1.07734	0.142611	0.722481	0	0.614535	3.60906	1.66663	0.3433	0.151125	0
CMC2	Cmc2	1 hr	0	0.140813	0.0392602	0	0.504886	0.815041	0.93256	5.50846	2.67179	0.894347	1.22413	0.83598	0.225615	0.34261	1.01841	0.829436	0.19918	2.2394	0.212267	0.0570581	1.53429	0.296022
CMIP	Cmip	1 hr	0.553669	0.559998	0.306088	0.703015	1.06727	0.685061	1.55287	0.456776	0.178445	0.749897	0.955136	0.606673	0.969342	1.11081	1.20523	0.477413	0.663495	0.761867	0.775694	1.01361	1.35746	0.338523
CMPK1	Cmpk1	1 hr	0	0.603508	0.0868361	0.0221163	1.41446	1.0681	0.856908	0.43423	1.20001	0.964429	1.43272	0.201466	1.76817	0.81623	0.706142	0.919357	3.3914	0.585934	0.46543	0.638065	0.391577	0.179201
CMPK2	Cmpk2	1 hr	1.42246	0.0755698	3.28035	0.593248	0.900154	0.609699	0.373222	0	2.15348	0.761867	0.62872	4.83904	1.10579	0.812247	0	0	2.48558	0.0940767	1.91855	3.54818	3.01354	0.581425
CMTM4	Cmtm4	1 hr	0.116053	0.942436	0.456089	0.708015	1.09625	1.32763	0.723027	0	0.219292	0.675674	0.676465	0.436854	0.592519	0.52769	0.410084	0.861188	0.245241	0.391406	0.759151	0.154727	0.796388	0.475089
CMTM6	Cmtm6	1 hr	0	0.125017	0.0417753	1.60022	0.9846	1.21982	0.135307	0	0.322369	1.23361	1.49732	0.696803	2.51928	1.26314	0.641652	0.203937	0.0783029	1.27147	0.626115	0.0735698	0.889937	0.116374
CMTM7	Cmtm7	1 hr	2.07049	2.82419	0.113584	0	1.91552	0.887541	1.0654	4.39984	0.198992	1.31502	0.67358	0	0.784083	0.827667	0	0	0.335029	0.53138	2.17439	0.0959742	0.439368	0
CNDP1	Cndp1	1 hr	11.3155	2.00024	0.548469	0.731188	0.432788	0	0	0	0	0.0685976	0.179289	0	0.499827	0.36232	0	0	0.237285	0	0.0551899	1.16585	0.221695	0
CNDP2	Cndp2	1 hr	0.0282523	0.118615	0.0739952	0.136085	1.66837	1.02131	0.473551	0.156169	0.105709	0.61032	0.888371	0.749652	0.413156	0.435629	0.0746691	0.24645	0.338201	1.30177	0.310725	0.184258	0.628515	0.346962
CNIH4	Cnih4	1 hr	0.131708	0.527992	5.8054	0.168401	0.805892	0.871167	1.42716	1.93005	1.26938	0.758192	1.10909	0.0799519	1.58089	0.640774	8.12709	0	0.833895	0.750467	0.225951	0.442439	0.192734	0.450357
CNKSR1	Cnksr1	1 hr	4.37551	0.386429	1.74659	0.468899	0.503142	1.21379	0.962878	1.33484	3.7008	0.451176	0.905486	0	0.386067	0.575605	0	0	0.39728	0.468538	2.65195	0.450814	0.214375	1.18666
CNN1	Cnn1	1 hr	2.10883	0.384703	0.183768	2.07844	0.728319	1.58525	0.34052	0	0.770954	1.98402	0.0873814	1.07405	0.209378	2.39279	43.8009	0.765607	1.69191	1.6701	0.293945	1.18577	0.824846	0.159144
CNN2	Cnn2	1 hr	2.70263	0.246682	0.375228	1.64733	0.588863	1.06841	0.922104	5.53845	0.150185	2.44818	1.23271	0.986495	1.89213	1.51808	1.96382	0.536174	6.4632	0.280142	1.32615	1.06118	1.48992	0.433797
CNN3	Cnn3	1 hr	0.0169568	0.154515	0.0606254	0.186363	0.766466	1.1255	0.826044	1.10923	0.151903	1.01822	1.27811	0.219878	1.36239	0.585165	0.923741	0.278688	1.07578	0.406447	0.609914	0.514018	0.414461	0.163621
CNOT1	Cnot1	1 hr	0.0240061	0.455537	0.401077	0.104194	1.21809	1.21567	0.475732	0.261445	0.827502	1.08828	1.33015	0.693388	1.00896	1.26187	0.792338	0.155392	0.906501	0.812625	0.549275	0.449166	0.386186	0.305479
CNOT10	Cnot10	1 hr	1.52247	0.110609	0.202603	0.603309	1.25331	1.53643	0.552736	0	1.13262	1.33181	1.57335	0.249453	2.77144	0.995484	1.43466	0.921951	0.118056	1.17885	0.181505	0.469275	0.909386	0.175455
CNOT2	Cnot2	1 hr	1.39056	0.269998	0.0901019	0.0326805	1.16461	0.922123	1.20851	0	1.14766	0.970683	1.18531	0.346885	0.206481	0.906347	1.42862	0	0.276658	0.79135	0.280755	0.231581	0.722608	0.119453
CNOT8	Cnot8	1 hr	2.25996	0.50489	1.89545	0.594946	1.15584	1.03773	0.738007	0	1.00796	1.23551	1.77766	1.7964	1.94086	1.19632	3.17112	0	1.76824	3.78983	0.771845	0.980011	1.26003	1.0539
CNP	Cnp	1 hr	0.348504	0.29795	0.352675	0.391791	0.946111	1.35124	0.669646	0.966522	0.790532	1.04949	1.32293	1.11458	0.880834	0.716408	1.04981	0.46086	0.759821	1.28779	2.04079	0.816757	0.210682	0.147364
CNPPD1	Cnppd1	1 hr	1.78097	0.99758	2.0727	0.228278	2.05304	1.42297	2.57457	1.75262	0.762434	0.917927	0.656601	1.03532	1.12449	1.1941	0.665699	0.402261	1.43242	1.95965	1.58192	0.758678	0.646798	2.50331
CNPY3	Cnpy3	1 hr	0.314138	0.464205	0.115017	0.0767951	1.02634	1.19402	0.888692	0.774644	0.30718	1.16522	1.23815	1.7249	1.60821	2.19386	2.22574	0.456543	0.686224	1.12841	2.20046	1.33502	2.88686	1.54277
CNTRL	Cntrl	1 hr	0.225741	1.82209	1.67809	0.481331	0.569516	0.93218	0.267611	0.279581	0.330416	0.90925	0.8569	0.147177	1.11123	1.10269	0.391151	0.0633104	0.597724	0.572647	1.54753	0.63621	0.585501	0.565854
COA5	Coa5	1 hr	0.79208	0.158085	0.0155087	0.0186104	1.78888	1.20254	0.764061	1.37304	2.50496	1.11528	0.995864	0	1.42928	0.42897	1.47891	0	0.681245	1.48542	0.120968	1.10453	0.140612	0.762717
COA6	Coa6	1 hr	0	0.141244	3.8031	1.32029	0.860331	0.585456	0	0	3.02678	0.526647	0.826726	0	1.13153	0.0787608	0	0	0.0606458	0.316881	2.6188	0.106327	0.262011	0.612234
COA7	Coa7	1 hr	2.19449	2.09863	3.75317	2.26548	1.1273	1.27187	0.626997	0	3.2552	0.638656	0.952932	0.416616	1.48458	1.35841	0.615597	0	0.0816133	1.60066	1.86752	0.783746	1.85975	1.9113
COBL	Cobl	1 hr	0	1.44849	0.147902	0.407127	1.78217	0.973461	0.734723	0.478126	1.48611	0.719925	0.768926	0.274814	0.7079	0.652563	0	1.88003	0.852166	0.187722	0.81195	0.329504	0.775406	0.265597
COG1	Cog1	1 hr	0.994079	1.38263	1.0184	0.764332	0.705675	0.657594	1.19397	0	1.36856	0.998716	0.924032	0.691926	0.833321	0.443223	0.740007	1.93796	0.393352	3.31352	0.169951	0.429311	0.0275794	0.18972
COG4	Cog4	1 hr	0.457995	0.314756	0.0951136	0.36964	1.53885	1.38118	1.30088	0.718084	1.44871	1.06928	0.79995	1.59049	1.53355	0.980065	0.983364	0.493034	0.516501	0.542618	1.67501	2.69184	0.35304	0.947243
COG7	Cog7	1 hr	1.07789	0.0716983	0.287899	1.34025	0.659866	1.23566	0.466693	1.22229	0.76505	0.942838	1.00388	0.321184	0.356279	1.54146	0.627084	0	0.242849	0.436022	0.669318	0.168939	0.100358	0.365028
COG8	Cog8	1 hr	2.0458	1.80444	0.237897	0.0535541	1.15433	0.940657	0.845389	0	1.41099	1.0219	0.887832	0.292908	0.469782	1.27819	0	1.12536	1.52356	0.338083	0.788557	1.53503	0.181792	0
COIL	Coil	1 hr	10.7489	0.0207448	1.90147	2.29562	1.28872	1.24229	1.04289	0	1.77305	0.940008	1.06419	0.0584241	1.31934	1.26219	1.55642	0.698267	1.18034	0.548397	1.99785	0.100902	0.140839	0.159608
COL18A1	Col18a1	1 hr	0.132113	0.589184	0.481493	0.476485	0.619088	1.14209	1.1719	0.597161	0.0360032	1.19414	1.22049	0.647903	1.2464	1.07557	0.344012	0.096675	0.499343	0.395124	0.758921	0.833383	0.925758	0.576616
COL19A1	Col19a1	1 hr	2.58693	0.725711	0.60502	1.40272	0.326208	0.0349197	0.026408	0.950324	0.0371749	0.0140406	0.0587087	0.277648	0.0181873	0.162595	0.241419	0.364256	0.370221	0.259169	0.157466	0.00792968	0.513137	0.776017
COL3A1	Col3a1	1 hr	0.025113	0.424089	0.536412	0.98173	0.264916	1.40954	0.880389	1.54129	0.378964	9.14512	5.19602	1.27213	3.54155	1.82844	4.15841	0.031693	1.96243	0.700877	1.19105	2.21344	1.84778	1.13713
COL4A2	Col4a2	1 hr	0.26966	0.45194	0.480391	0.581743	0.772618	1.61007	0.767234	0.413843	0.168457	3.16512	2.51485	1.03763	2.08104	1.05816	1.68075	0.0979056	0.70968	0.631008	0.926738	0.693423	0.621661	0.544673
COL4A3	Col4a3	1 hr	0.0920581	0.475238	0.377951	0.370536	0.765432	0.729455	1.21385	0.290519	0.443211	1.25443	0.552502	0.488034	0.259724	0.495602	0.0912482	0.111127	0.482716	0.474527	0.496655	0.426698	0.084904	0.348777
COL4A4	Col4a4	1 hr	1.34352	0.459974	0.506303	0.35575	0.726794	0.726794	2.05011	1.20911	0.313317	1.63943	0.814972	0.623459	0.544244	0.935491	0.264011	1.14314	0.489391	0.775715	0.733595	0.629654	0.459451	0.803544
COL5A2	Col5a2	1 hr	1.43396	1.01195	0.394636	0.89279	0.560752	0.869018	0.845586	0.366625	0.654333	3.17019	1.9629	1.19706	1.51882	0.926355	2.70507	0	1.50377	0.032931	0.871307	1.84297	1.18576	0.598945
COL6A6	Col6a6	1 hr	0.762359	1.40708	0.88898	1.26016	0	0.00726346	0	0	0.112398	0.149931	0.0360808	0.0800332	0.0168918	0.0268241	0.567665	0.231519	1.08364	0.0511145	0.409659	0.152735	0.822325	0.332498
COL8A1	Col8a1	1 hr	1.25348	1.83819	0.531267	0.721655	2.21618	0.749675	0.861199	0	0.532381	4.59028	0.555762	5.25348	1.08536	0.193171	2.10447	0	2.12693	0.415476	0.096864	0	0.252366	0
COLGALT1	Colgalt1	1 hr	1.29768	0.287062	0.318889	0.148887	0.637623	0.902872	0.942539	0	0.667742	1.62394	1.26158	0.871356	1.81102	1.56339	2.59241	0.479576	0.840693	2.59156	1.50455	1.95564	0.506822	0.381145
COMMD2	Commd2	1 hr	1.1793	0.810473	0.485922	0.700201	0.773716	1.28567	0.496086	0	1.19768	0.98535	1.27189	0.223886	1.6506	0.483555	0	0.688923	2.6858	2.98752	0	1.48742	0.138954	1.54367
COMMD4	Commd4	1 hr	0.316859	4.47626	2.51837	1.6201	1.22841	0.966872	0.716805	5.04319	0.842744	1.06042	0.615008	3.54842	0.14324	0.603541	0.719622	1.04292	0.662889	2.01884	0.235381	0.0438573	2.50469	0
COMMD5	Commd5	1 hr	0.842564	0	0.173118	0.0767518	1.25276	1.32781	3.15109	13.5266	1.55593	1.26001	0.904392	0.685649	2.99119	0.927844	0	0	0.0720614	0.288246	2.83811	0	0.30317	1.54783
COMMD6	Commd6	1 hr	0	0.0211829	0.0216152	0.276387	0.321779	1.33741	1.15079	0	1.34245	0.722236	1.25512	0	2.59109	0.755524	0.717625	1.58267	1.37646	3.61767	0.876857	1.11275	0.0488504	1.06304
COMMD7	Commd7	1 hr	3.82191	0.235074	0.0956286	1.5545	0.540101	1.28391	1.30544	0	2.08707	1.08574	1.1952	0.364219	2.22882	1.35033	5.32768	0.836519	1.10988	0.0281351	1.19382	0.173577	0.512581	0.173884
COMT	Comt	1 hr	0.0873275	0.10507	0.227772	0.818993	0.709432	1.15466	0.290038	0.554128	0.76449	0.838566	0.975628	0.622382	1.19725	0.77131	2.26281	0.671895	0.365334	3.06278	1.96761	0.337944	0.152587	1.18289
COMTD1	Comtd1	1 hr	0.783495	0.942682	0.309419	0	1.34264	0.916317	5.80284	0	2.00724	0.961585	0.12138	2.03012	1.80925	0.340758	0	0	0.114913	6.64056	2.15349	0.108446	0	3.66974
COPA	Copa	1 hr	0.387839	0.883611	0.797385	0.590631	0.756049	0.884801	0.791274	0.304704	0.603226	0.901428	0.916865	0.539329	1.1304	0.770597	0.93097	1.32529	1.2626	0.143035	0.443848	0.851672	0.795165	0.398035
COPE	Cope	1 hr	0.432185	0.593606	0.112541	0.900198	0.852981	1.28964	0.713185	0.777677	1.01076	0.786442	0.726685	1.12848	0.802437	1.98523	2.08991	1.04403	0.421564	1.56975	0.841337	1.20436	0.999751	0.394948
COPRS	Coprs	1 hr	0	0.019482	0.03438	0	1.1389	1.16984	0.301398	2.53747	1.86019	1.36007	1.12858	1.13592	1.17969	1.35136	1.8171	0.454275	0.292918	0	2.1609	1.20949	0.516846	0
COPS3	Cops3	1 hr	0.169076	0.0125078	2.28892	2.17356	0.588306	0.791962	0.937494	1.10745	4.68585	0.82257	0.899382	0.996501	2.52039	0.917923	0.477502	6.18296	0.969573	1.6781	0.0470881	0.0595958	1.1672	0.343154
COPS4	Cops4	1 hr	0	1.23444	0.346558	0.0274321	0.598933	1.29053	0.70729	10.3873	4.69911	0.851918	1.11146	0.139446	0.703785	0.158649	0	0	0.194768	1.30394	0.0487681	0.256033	0.207264	0.553213
COPS5	Cops5	1 hr	0	0.157747	0.0527121	0.0381708	0.396509	1.12604	0.0942585	0	2.88644	1.1398	1.25353	0	0.640984	0.765493	0	0	0.0408973	0.0877669	0.562046	0.392744	0.432862	2.10368
COPS6	Cops6	1 hr	0.439574	0.7384	0.277366	0.0857804	0.731457	1.20196	1.02627	0.984208	2.57691	1.0312	0.767433	0.64407	0.614348	0.832041	1.09202	0.113724	1.4002	1.644	0.869509	0.396024	0.714359	0.493166
COPS7A	Cops7a	1 hr	0.606198	0.0552116	0.654842	0.291657	1.1813	1.3573	0.928848	1.24739	1.70366	1.01269	0.995553	2.30565	1.369	1.34632	1.14867	0.793897	2.35911	0.354462	0.26949	0.073376	0	0.882051
COPZ1	Copz1	1 hr	0.12923	0.023844	0.104149	0.499263	1.26418	1.40376	1.65064	0	1.58169	1.17196	1.11606	0.557411	1.6305	0.721732	1.14046	0.31942	0.607461	0.854674	1.64614	1.4537	0.444151	0.262284
COQ10B	Coq10b	1 hr	0.796024	0.0692269	1.22662	0.571756	1.20597	0.6943	0.78553	0	1.06396	0.884039	0.918229	0.0700732	1.93971	1.81801	0	1.0858	0.0286047	0.204295	0	0	0.4658	0
COQ5	Coq5	1 hr	0.073034	0.043799	0.306593	0.0192758	0.647454	0.799841	0.855205	0.805945	2.5518	0.60569	0.854777	1.88882	0.331009	0.217496	0	0.26847	0.578382	0.283783	0.125293	0.0433707	0.0532228	0.920422
COQ6	Coq6	1 hr	1.41402	4.77589	0.0359071	0.20874	1.69051	1.33144	0.852914	3.41477	2.47831	0.847169	1.06309	0.764582	0.693965	1.49326	2.8156	3.1177	0.0404554	0.161821	1.45663	2.37083	0.0811501	0.27074
COQ7	Coq7	1 hr	3.44983	0.303362	0.317676	0.212819	0.783593	1.04202	0.514961	0	2.31172	0.64212	0.773939	0.943707	0.733772	0.460369	0.602508	0.219921	0.419203	0.035285	1.2838	0.125273	0.438177	0.258757
COQ9	Coq9	1 hr	1.05753	0.0595632	0.068523	0.575414	0.624693	1.10961	0.591736	0.846194	2.56885	0.493178	0.560299	0.263808	0.437589	0.484725	0.0925586	0.497697	0.303542	0.462365	0.237045	0.385817	0.608721	0.240473
CORIN	Corin	1 hr	1.41468	1.99804	1.22756	1.5576	0	0.0131003	0.0572942	0	0.0286471	0.128399	0.141499	0.0722096	0	0.136764	0.411397	0	0.298151	0.562288	0.164859	0.089098	0.982524	0
CORO1A	Coro1a	1 hr	6.58094	0.313085	1.80386	0	0.418472	1.58914	0.82421	0	0.159397	1.78981	1.34236	4.52459	3.08036	9.82904	1.04333	32.1371	11.3734	1.51669	9.18223	3.03074	4.83855	3.77415
CORO1B	Coro1b	1 hr	1.2065	0.0961857	0.978528	0.794397	1.22984	1.19493	1.21839	1.07905	0.344671	0.928831	0.686259	0.0260437	1.36396	1.0861	0.392292	0	0.45413	1.00652	0.920715	1.418	1.65346	0.1467
CORO1C	Coro1c	1 hr	0.166304	0.454032	1.05649	1.38107	1.29352	0.660915	1.26133	2.63076	0.941775	1.47786	1.11101	0.493511	1.36451	1.26547	3.14519	0.183081	3.38479	0.138936	0.606599	1.74939	0.90712	1.23385
COTL1	Cotl1	1 hr	0	0.237389	0.110671	0.277281	0.643861	0.764584	0.698816	1.05506	0.109688	0.669039	0.624771	0.101285	2.41537	1.37562	0.123388	2.00788	3.81576	1.89698	0.448933	1.01716	1.10266	0.635552
COX10	Cox10	1 hr	0	0.0500761	0.146921	0.797911	1.02774	1.4567	0.443363	0	4.49315	0.755866	1.24694	0.379823	0.351478	1.39268	2.18445	0	0.892394	1.68298	0.191565	1.824	0	1.74251
COX16	Cox16	1 hr	0	0.83709	0	0.0660281	1.46656	0.698431	0	0	3.71372	0.620298	0.541064	5.11718	0.721907	0.0594253	0	0	0.154799	0.247972	0.590218	0.0799674	0	0.414877
COX17	Cox17	1 hr	0	0.041429	0.245366	0.0624923	0.971838	1.03335	0.183431	0	4.77787	0.461857	0.532161	0.224303	2.27664	0.418475	0.498962	0	0.139213	2.69944	0.224442	0.962771	0	0
COX18	Cox18	1 hr	0.261691	0.16239	0.400623	0.198603	0.669147	0.642271	0.165351	0	1.41163	0.702627	0.868889	0	0.230033	1.05246	1.80565	0.864789	0.98345	0.109095	0.985955	0.38263	1.3351	0.257592
COX20	Cox20	1 hr	0.0634269	0.176922	0.0511169	0.624223	0.786902	1.03018	0.256192	0.485556	1.00109	0.646635	0.67269	0.421356	0.555055	0.344349	0	0.575038	0.18189	0.765043	0.581828	0.505207	0.564991	0.47446
COX4I1	Cox4i1	1 hr	0.224313	0.0347879	0.347402	0.172471	0.461349	1.04191	0.512181	0.203239	1.90122	0.603933	0.549852	1.01318	0.268409	0.563106	0.128247	0.210472	1.17611	0.547079	0.337764	0.0968739	0.773522	0.113322
COX4I2	Cox4i2	1 hr	29.2803	0	0.47821	0.212014	0	0.195524	0	0	2.66784	0.512367	0.365135	0.487633	0	0	0	0	0.661955	0	0.614841	0	0	0
COX5B	Cox5b	1 hr	0.0352263	0.165543	0.0908548	0.200872	1.82386	1.29769	0.728491	0	3.32501	0.709174	0.860048	0.625189	1.05818	0.478757	0.302006	0.102373	0.372872	0.908858	0.782725	0.314815	0.409699	0.253608
COX6A1	Cox6a1	1 hr	0	0.00644482	0	0.113353	0.575181	0.937532	0.351887	4.90261	0.310716	0.512553	0.3346	0.242174	0.541365	0.263328	0.337481	0	0	0.361213	0.121997	0	0.252789	0.085754
COX6A2	Cox6a2	1 hr	0	1.01829	11.9657	2.18743	0	1.848	0	0	634.282	0.425143	0.0891429	0	0	0	0	0	0	1.09029	0	0	0.757714	21.1646
COX6B2	Cox6b2	1 hr	68.4646	0.403907	0.712777	4.14361	2.10982	0	6.24868	0	0	0.784055	0.917107	1.96727	7.07075	1.42555	0	168.501	15.6573	0.869588	0	0	0	0
COX6C	Cox6c	1 hr	0	0	0	0.047659	0.347257	0.722887	0.254585	2.33925	3.78993	0.264723	0.322296	0.243332	0.61367	0.290098	0.180116	0.651319	0.614945	2.84089	0.00564257	0.0964338	0.0877309	0.433681
COX7A1	Cox7a1	1 hr	0	0	0.210025	0	0.380543	0.680723	0	0	30.5036	0.44166	0.298492	1.07849	0	0.634802	0	20.4737	1.63259	0	1.85072	0	0.336985	5.91513
COX7A2	Cox7a2	1 hr	0	0.0534509	0.0337172	0	0.767654	0.933103	0.316262	0	1.48382	0.42447	0.536207	0.647683	0.987207	0.584169	0	6.09666	0	0.566657	0.0231315	0.093441	0	0
COX7A2L	Cox7a2l	1 hr	0	0.0171014	0.204635	0.0209405	0.748856	0.5868	0.987811	1.28796	1.42861	0.545733	0.900675	0	0.769331	1.21467	1.9548	0	0.973036	0.718725	0.503619	0.266526	0.206846	0
COX7B	Cox7b	1 hr	0	0	0	0.0724219	0.507119	0.754866	0.15589	0	4.52894	0.40347	0.527633	0	0.373156	0.275569	0	0	0.00955105	0.710598	0.0433535	0	1.09704	0.193679
COX7C	Cox7c	1 hr	0	0.00238715	0.0322378	0.0698129	0.380661	0.704806	0.243062	0.0847439	1.97398	0.255391	0.394995	0.276696	0.424327	0.252047	0.236542	1.10366	0.805709	0.869554	0.0235224	0.186367	0.608532	0.211364
COX8A	Cox8a	1 hr	0.299621	0.0222896	0.73298	0	0.724488	1.22563	0.28461	2.60091	2.60713	0.495527	0.704776	0.243821	1.92085	0.198484	1.51312	0.300531	0.0477635	0.93677	0.748901	1.04655	3.51554	0
CPD	Cpd	1 hr	0.114298	0.429014	0.852231	0.112552	0.782784	1.8024	0.214943	0.57451	0.466994	0.788357	3.9506	0.416906	1.98288	0.713561	0.76949	0.410729	0.354576	0.731913	0.504727	0.255139	0.229065	1.39028
CPE	Cpe	1 hr	0	0.210007	0.0129158	0.169107	0.505718	0.455006	0	0	0.681032	0.871565	1.63154	0.382117	0.657654	0.718829	5.99803	1.20833	0.509523	2.61224	0.629069	0.264173	0.0110635	1.29613
CPEB3	Cpeb3	1 hr	0.780102	0.531278	0.0309601	0.862306	0.642383	0.828449	1.32366	0.844234	2.30462	0.64307	0.712692	0.180651	0.407438	0.264838	1.04875	0.377316	0.184159	0.837218	0.242114	0.128111	0.547368	0.374419
CPEB4	Cpeb4	1 hr	0.454684	2.67739	0.307521	4.35782	1.79399	1.22628	1.42363	0.936539	0.789831	0.815945	1.40331	1.0361	0.99582	1.44815	0.878866	0.482667	1.51113	0.426539	2.03602	2.91741	0.964099	1.51333
CPLX2	Cplx2	1 hr	1.06278	0.790503	4.41173	3.55584	0	0.0818167	0	1.85613	0	0.0241426	0.195991	0.684209	0.184087	0	0	1.67892	0.999572	0.951454	0.0536503	0.384102	0.769378	0.608595
CPN1	Cpn1	1 hr	0.460029	0.612171	10.0646	4.04818	0	0.0456426	0	0	0	0.0132123	0.292673	0.366342	0	0	0	6.73509	0	1.38289	1.05138	0.0872815	0.0884826	0
CPNE4	Cpne4	1 hr	0.488526	0.721901	0.0851873	0.158049	0	0.0156131	0	0	0	0.0142435	0.0745047	0.125316	0.718751	0.159144	0.32541	0.563579	0.27679	0	0.0438263	0	0.802843	0
CPNE8	Cpne8	1 hr	0.963862	0.00490089	0.564583	0.0258306	0.884352	0.744532	0.205434	0	0.263264	0.583206	1.12894	0	1.18688	0.554262	0.136994	0	0.116526	0	0.543596	0.0412252	0.0076108	0
CPOX	Cpox	1 hr	0	0.541428	2.97003	3.16221	1.64493	1.64872	1.75335	3.6289	2.25563	1.81481	1.37018	2.23333	2.3382	3.56057	6.0798	5.40171	1.71278	0.0754488	1.17183	1.99939	0.652941	0.268342
CPSF1	Cpsf1	1 hr	0.0430161	0.351475	0.483446	0.444281	0.686373	0.952034	1.34666	1.21141	0.452693	1.20879	0.568522	1.4239	1.05855	1.61727	0.699865	0.229146	0.313048	0.219915	0.893751	0.984235	0.451382	0.37155
CPSF3	Cpsf3	1 hr	0.874751	0.489471	0.121277	0.41221	0.750224	0.851072	0.224724	0	1.22521	0.833335	1.49033	0.0849679	1.36961	0.292605	1.76733	0.184051	1.4712	1.74087	0.149413	0.490028	1.67818	0.798141
CPT1A	Cpt1a	1 hr	0.316143	2.13173	0.921571	1.89622	1.09344	0.74	1.12368	0.780022	0.273794	1.16212	0.802908	0.514127	0.80214	0.829699	0.582345	3.3545	0.568324	0.628687	0.853507	0.593689	1.79105	0.719264
CPT2	Cpt2	1 hr	0	0.281096	0.595451	0.107413	0.96733	0.541005	0.372003	0	1.25742	0.460938	0.46993	0.610478	0.918305	0.0843781	0	0	0.0519818	0.642259	0.675148	0.0268532	0.565272	0
CPTP	Cptp	1 hr	0.89583	0	2.39994	0	0.703718	0.935871	1.76158	0	3.62813	0.798114	0.898942	2.32878	0.689403	0.0973007	0	0.724465	0.59397	1.47818	1.4954	0.627579	5.04988	0
CRAT	Crat	1 hr	0	0.106809	4.86014	0.610818	1.42198	0.684307	0.670894	1.19823	4.09613	0.606906	0.414733	0.407119	0.194548	0.791954	1.2945	0	0.584273	2.08177	0.736279	0.482144	0.714973	0
CRB3	Crb3	1 hr	0	0.738668	0.946786	0.200973	1.48356	1.20307	1.20561	0	0	0.670679	0.52548	1.3432	2.73227	0.26781	0	1.68085	0	0	0.605224	0.260205	0	0.260666
CREB1	Creb1	1 hr	2.13706	1.02904	1.5505	1.13024	0.877713	1.06628	0.863477	0.571027	1.14035	1.23897	1.41975	1.71494	0.867397	0.997736	0.889782	0.163453	1.36781	1.74728	1.26615	1.5569	0.236694	0.380495
CREB3	Creb3	1 hr	1.50748	0.976937	3.39119	0.130183	1.71426	1.02533	1.02105	1.12743	0.802645	0.812911	0.70168	2.96104	0.399687	0.504262	0.561795	0.696942	0.609288	1.33894	0.358172	0.950652	0.975696	0.553898
CREB3L3	Creb3l3	1 hr	2.47415	1.75351	0.264444	2.6987	0.72469	0	0	0	0	0.0291577	0.105292	0.646733	0	0	0	0	0.258774	0.699379	0.164214	0.228604	4.69459	0
CREB5	Creb5	1 hr	0.0391599	0.934842	1.87267	0.649296	0.914688	0.638329	1.1121	0	0.802031	0.574364	0.692648	0.963264	0.561732	0.880179	0.299326	0.14395	0.310121	0.630405	0.349396	0.0125174	0.412155	0.0649411
CREBRF	Crebrf	1 hr	0.109026	0.107725	0.285547	0.244293	1.62416	1.23557	0.763141	0.855893	0.89041	1.26067	1.25839	0.335115	1.23404	1.42139	0.31238	3.51132	1.32769	0.802976	1.48483	0.360608	0.20627	1.57356
CREG1	Creg1	1 hr	0.150569	0.124177	0.0503891	0.00979485	1.10769	0.932198	0.284649	0	1.40338	1.04332	1.32998	0.222071	2.21304	0.546281	1.71307	3.02955	0.589324	2.81303	0.513033	0.0914186	0.640311	0.603308
CRELD2	Creld2	1 hr	0	0.591302	0.65686	2.48673	0.488327	0.958267	2.10585	0	0.777263	1.09226	0.886313	0.257115	1.03118	2.04157	0.903422	1.97458	2.42517	0.241925	1.41461	4.43012	2.49856	0.180844
CRIP1	Crip1	1 hr	0	0.0737277	0.322037	0.155802	0.439932	0.546003	1.23911	8.92732	1.02836	1.48221	0.597473	6.13401	0.968546	1.15391	1.54793	0	0.109548	4.64241	1.90614	0.140848	0.172843	4.27586
CRK	Crk	1 hr	0.267396	0.607207	1.24687	0.999117	0.241758	1.3932	0.477594	0	1.61614	1.65662	1.61982	0.120542	0.18531	1.86742	1.03098	0	0.446934	0.258925	2.32215	1.74216	0.990196	0.737793
CRLS1	Crls1	1 hr	0.217095	0.0134996	0.3205	0.627777	1.80821	0.834679	1.87405	0	1.53831	1.00218	1.46163	1.61977	1.53565	0.481485	0.624563	0	1.45492	0.317194	1.55098	1.18695	1.65962	0.103864
CRYBB3	Crybb3	1 hr	0	0.185035	3.60378	0.226573	0	1.06364	1.65524	0	0	0.356224	0.0503497	4.02042	0	0.477063	0	0	4.75552	0	0	0	1.25622	0
CRYM	Crym	1 hr	0.226434	0.27244	1.04188	0.0917238	2.10605	0.14463	0.269852	0	0.0743279	0.103513	0.0478746	0.131547	0	0.642641	0	1.17659	0.109407	0.558681	0.377534	1.21153	1.03196	0.521877
CS	Cs	1 hr	0.127822	0.148056	0.452344	0.256661	0.777652	1.4157	0.514939	0.561504	4.19227	0.770445	0.902471	0.147548	0.855583	0.523716	0.970425	0.316576	0.643685	0.915175	0.281098	0.31884	0.399543	0.107727
CSAD	Csad	1 hr	0.336367	0.424926	0.542762	2.07706	1.1373	1.15524	2.27406	0.809965	0.429806	1.00843	1.49917	1.42909	0.716709	1.67696	0.368631	0.726163	0.294893	0.612048	2.22319	1.57254	0.575453	0.988242
CSF1	Csf1	1 hr	0.925597	4.6244	0.923522	2.35002	0.502693	0.313217	0.386781	2.18242	0.726877	1.97833	1.26145	0.887777	0.817041	1.36765	1.94456	0.605024	1.08103	1.20844	1.48837	0.934085	2.03124	3.45312
CSF2RA	Csf2ra	1 hr	0.66838	4.20379	3.43781	9.29918	0	1.06941	0	0	0.516456	1.07705	1.80059	0	0	4.01962	0	0	4.05356	0	1.11439	5.81894	4.67611	7.43408
CSF2RB	Csf2rb	1 hr	1.92792	13.6141	3.25456	0	0.342762	0.579075	0.220803	0	0.776764	0.65663	0.910888	1.24118	3.57391	4.6621	0	32.8981	2.90511	1.31873	2.8674	2.78345	1.01399	0
CSF3	Csf3	1 hr	3.72381	0	0.188123	1.09009	0.267601	0	0.529369	0	0	0.120311	0.164061	5.56566	0	0	0	5.96743	1.47363	0.492911	0.853115	0	0.0962489	0
CSGALNACT1	Csgalnact1	1 hr	0.518591	0.938532	0.556363	1.8538	0.552141	1.0715	1.1267	0.577782	0.472682	1.13491	0.520511	0.181872	0.586841	0.857691	1.32439	0.218031	0.37119	0.142488	0.420785	0.992272	0.401899	0
CSK	Csk	1 hr	1.97131	0.952334	0.978617	0.961572	0.68027	1.02447	0.93375	0	0.836647	1.1979	0.980377	1.93964	3.01448	2.21478	0.940898	0.217959	2.12131	1.87586	2.41878	2.23623	0.64464	1.62854
CSNK1D	Csnk1d	1 hr	0.362112	0.501458	0.713272	0.540813	0.942734	1.06457	1.37615	0.873643	0.733304	1.2044	0.766701	1.61884	0.930817	1.41139	0.79604	0.318075	0.468544	0.175296	0.8346	1.32928	0.422748	0.279259
CSNK1G2	Csnk1g2	1 hr	0.254667	0.649467	4.10334	1.04073	1.10784	0.908853	2.95645	1.47846	1.01696	1.13427	0.760936	0.713871	1.47475	1.53225	0.819324	1.65381	0.857483	2.61214	2.55847	1.59577	2.37475	1.45587
CSNK2A1	Csnk2a1	1 hr	1.77658	1.20412	0.0558879	0.0270386	1.70392	0.79088	0.579641	0.979366	2.083	0.798545	1.06006	0.142979	0.646211	0.70234	1.38905	0.171406	0.504802	1.40444	0.367255	0.0431532	0.353796	1.20962
CSNK2B	Csnk2b	1 hr	0	0.254978	0.0453643	0.262018	0	1.8434	0	0	2.89292	1.63814	1.54942	0	0.0474872	1.94206	0	0	2.8156	0	0.867619	0.589624	0.251962	0.260565
CSPG4	Cspg4	1 hr	5.71	1.49147	1.11827	0.941632	0.506777	0.363878	1.01982	0	0.647455	1.72649	0.401503	3.98002	0.605057	0.671429	2.62445	0.301946	1.83815	0.583359	1.46844	0.338239	0.440183	0.899179
CSPP1	Cspp1	1 hr	0.954865	2.68473	0.905054	1.65515	1.61483	1.27178	1.59851	1.70591	0.59347	0.939012	0.982412	0.766216	0.611745	1.08695	0.115474	0.582778	1.05737	0.772944	2.02675	2.15553	0.801959	1.51976
CSRNP1	Csrnp1	1 hr	0.29189	0.396208	0.766694	0.497245	0.444371	0.603363	0.918699	0	0.254735	0.395838	0.535087	0.985916	1.05948	0.399278	0.629932	0	0.0402771	0.0168306	0.665075	0.322587	0.345557	1.9378
CSRP2	Csrp2	1 hr	0	0.0607145	0.0382991	0.129445	1.27842	1.54043	0.448308	1.48357	0.493881	1.38901	0.83694	0	1.28599	0.212278	0.985238	0	0.358498	2.13273	0.12039	0.783351	0.408524	0.167893
CST3	Cst3	1 hr	0.141174	0.00406357	1.42678	0.312591	1.05592	0.70214	0.550157	0.621228	0.99668	1.30731	0.813709	0.360137	1.54639	0.672202	1.95358	1.23389	1.74662	0.277401	0.9046	0.814621	0.672866	0.272066
CST7	Cst7	1 hr	0	0	1.30874	0	0	3.44592	0	0	1.45702	0.86712	1.14756	0	1.36999	0.522206	0	0	1.36032	0	0	0	1.60208	0
CSTB	Cstb	1 hr	0	0.775106	0.31852	0.0327087	0.633591	1.29399	0.208824	0	1.37643	0.704349	0.562723	0.0460591	1.213	0.386385	0.397955	0	0.537913	1.84047	0.179008	0.336543	1.13868	1.09496
CSTF3	Cstf3	1 hr	0.241933	0.671877	0	0.301076	0.640134	1.01602	0.541652	1.61207	0.770088	0.827942	1.07089	0.883627	1.20146	0.574344	1.49433	1.91844	0.777413	1.57829	0.412716	0.048495	0.0482237	0.0767103
CTBP1	Ctbp1	1 hr	0.486136	0.234229	0.0408633	0.213891	0.869268	1.00531	2.14154	0	1.09924	1.02847	0.839418	0.920332	1.26273	1.76585	0.650434	0.276907	0.719269	0.500622	1.50421	1.35268	0.761603	1.06323
CTCF	Ctcf	1 hr	1.76264	1.08975	0.283815	0.514183	0.728582	1.21795	1.17467	1.07027	1.55735	1.10597	0.888822	0.75767	1.09473	0.93098	0.462566	0.177581	0.708597	0.81366	1.69196	1.63119	1.47639	0.823984
CTDNEP1	Ctdnep1	1 hr	2.29099	0.796234	0.281434	2.08486	1.15306	1.05417	1.85926	1.40226	5.10239	1.0005	1.30828	0.925303	1.10421	1.86928	1.56544	0	2.18807	0.943095	3.21679	2.21579	1.38673	2.98185
CTDSP1	Ctdsp1	1 hr	0.0684544	0.249927	0.689191	0.444269	1.2177	0.824849	2.25393	0.448379	1.08616	1.43504	1.16653	0.613886	0.582846	0.791009	1.00829	0.208044	1.80198	0.855948	1.12965	1.16688	1.45017	3.53002
CTDSP2	Ctdsp2	1 hr	0.606534	0.633031	0.171586	0.432915	1.43489	1.36349	0.901476	2.09188	1.40054	1.60063	1.7317	0.899062	1.82697	1.37627	1.85908	0.0992109	1.20949	1.2105	0.961736	0.573089	1.59835	0.451871
CTH	Cth	1 hr	0	3.53598	0	0	1.22493	0.75211	0.536929	0	1.34539	0.267444	0.342165	0.169041	0.727203	0.15475	0	0.809273	0.128618	0.276019	0	0.685963	0.0902368	0
CTNNA1	Ctnna1	1 hr	0.176351	0.483376	0.25591	0.150372	0.814802	1.03377	0.34858	0.281839	0.427212	0.889484	1.0557	0.552102	1.06686	0.463504	0.451339	0.192243	0.413285	0.957121	0.427568	0.391214	0.589698	0.204031
CTNNA3	Ctnna3	1 hr	3.07382	0.090138	0.0301202	0.142292	0.0380583	0.027672	0.264331	0	3.57837	0.0361294	0.100005	0	0.0528216	0	0	0	1.8104	0.256244	0.038726	0	0.388372	0.45796
CTNNBL1	Ctnnbl1	1 hr	2.49632	1.25582	0.188741	0.231184	0.550431	0.846479	0.376976	0.254519	0.761628	0.69071	0.55591	1.36935	0.880162	0.643094	0.453879	0.492872	0.146029	2.04738	0.671873	0.334939	1.04395	0.208762
CTNND1	Ctnnd1	1 hr	1.23289	1.17665	2.40373	3.33116	1.59493	1.80075	1.38371	2.06877	0.484843	1.6788	1.85367	2.25619	2.00152	1.74818	0.451118	0.534984	0.887457	0.793524	1.78726	3.59035	1.43985	2.11509
CTNND2	Ctnnd2	1 hr	1.58317	0.792397	0.0531225	1.20166	0.0905304	0.0183623	0	0	0	0.0371516	0.135796	0.202327	0.27347	0.0889077	0	0.351446	0.924947	1.01368	0.369723	0.0964234	0.151852	0.199167
CTPS1	Ctps	1 hr	0.410244	1.87681	0.225864	0.124128	1.51141	0.874074	1.83798	1.93233	0.351739	1.11812	0.869738	2.21159	0.596307	0.686523	0.351416	0.51431	0.658694	0.367272	2.7481	2.25411	0.178102	1.29707
CTPS2	Ctps2	1 hr	0	1.26648	1.13774	0.0815683	0.92704	0.775794	0.881142	0	0.952482	1.10641	1.62242	1.43512	0.925634	0.776944	0	0	1.15001	0.554358	0.335734	0.386746	0.351843	0.627743
CTSA	Ctsa	1 hr	0.0187796	0.429122	0.371021	0.0528142	1.54249	0.985819	1.35772	0	0.342631	0.526875	0.46178	0.888617	0.342439	0.80945	0.426506	0.484607	0.671963	0.991684	0.49251	0.579386	0.476429	0.407782
CTSB	Ctsb	1 hr	0.498503	0.425009	0.587158	0.33149	1.12897	0.579665	0.5418	0.587158	0.273774	0.720421	0.633217	0.701124	0.858037	0.452893	0.414089	0.791224	0.549146	0.639883	0.32113	0.490428	1.2288	0.38495
CTSC	Ctsc	1 hr	0.473	0.0158325	0.24701	0.416328	1.24097	0.839856	0.568111	1.17613	0.276855	0.634847	1.372	0.062246	1.45875	0.764913	0.482445	0.0767236	0.665892	0.150428	0.386134	0.814501	0.334804	0.140518
CTSD	Ctsd	1 hr	0.182033	0.309201	0.231249	0.0662067	0.967978	2.50023	0.419389	1.41493	0.220746	0.774785	0.924535	0.816161	1.12988	0.491931	0.498008	0.310091	0.270225	0.676219	0.531334	0.304359	1.14142	0.117343
CTSE	Ctse	1 hr	0	0.0842325	1.29421	0	0	0	0	0	0	0.184321	0.107025	0	1.58853	0.678815	0	5.39187	0.312156	0.906739	0.517287	0	0	0
CTSF	Ctsf	1 hr	1.13096	0.0362453	0.948315	0.0260541	0.860228	0.84853	0.752467	0	1.36243	0.905689	0.870685	0.676431	0.238209	0.925274	3.58589	0.280835	0.959747	0.198419	0.281366	0.746795	0.0630083	0.547047
CTSO	Ctso	1 hr	0.779182	0.00864514	0.648996	0.152053	0	1.81833	0	0	0.705444	1.42065	3.04929	0	0	0.454633	0	0	0.291189	0	0.843969	1.83541	1.51534	0.115031
CTSS	Ctss	1 hr	0.180229	0.739582	0.204856	0.100075	0.24658	1.58928	0.558882	0	0.304617	1.03024	1.65924	1.61626	7.29637	1.71178	1.42677	58.7037	0.37881	0.415672	2.29576	0.474493	0.353713	3.34639
CTSZ	Ctsz	1 hr	0.639852	0.185408	1.37933	2.02876	1.42194	1.2407	0.761586	2.43166	0.88006	1.41252	1.28602	0.382698	2.42594	1.26532	1.11265	0.0993722	0.698613	1.34915	1.47474	0.760032	3.19445	1.52087
CTTN	Cttn	1 hr	0.226209	0.846867	0.813235	0.856788	1.28073	1.2896	1.01888	0.462271	0.427728	1.17316	1.08858	1.01783	0.968573	1.17067	1.00103	0.370454	1.01391	0.79899	0.740987	1.09211	0.829368	1.11839
CTU2	Ctu2	1 hr	2.38637	3.49278	1.0778	1.46405	0.522525	1.12749	2.17781	0	1.88267	1.09926	0.718283	4.55666	1.01192	1.42791	1.0827	0	3.59593	3.22098	1.40494	5.162	3.85306	0.877902
CTXN1	Ctxn1	1 hr	0	1.93039	0.152801	1.95382	1.66452	3.42886	5.32869	8.96027	0	2.53039	1.82649	5.93684	2.95314	1.91511	0	0	0.235314	1.54126	1.19185	9.32292	8.81053	0
CTXN3	Ctxn3	1 hr	0.163728	3.90859	0.0360106	0	0.434287	0	0	0	0.292166	0	0.00960282	0	0	0.164448	0	0	0.906986	0.363227	0.0424925	0.27104	0.17069	0
CUBN	Cubn	1 hr	0.418046	0.0968655	0.107663	0.0169002	2.86893	0.0182386	0.259034	0.478952	0.0182195	0.0212697	0.0349725	0.456221	0.00872814	0.167792	0.0316225	0.121671	0.0431855	0.00941505	0.0287304	0.0269967	0.104847	0.040367
CUEDC1	Cuedc1	1 hr	0.161425	0.909159	0.102619	1.23732	0.704563	1.5139	1.65684	0.645874	1.73939	1.33486	0.934595	0.760044	1.74405	2.09485	1.76389	0	1.71727	0.965107	1.71599	1.05279	3.04636	1.24461
CUEDC2	Cuedc2	1 hr	0.606788	0.439378	0.663107	0.812219	0.919034	1.23294	0.48726	3.23569	2.26723	1.44527	1.3198	2.91964	0.14139	0.722039	1.80207	1.36221	0.118577	0.080319	1.68206	2.49999	4.78409	1.02122
CUL1	Cul1	1 hr	0.171912	0.199125	0.900006	0.583706	0.95847	1.15946	0.562333	0	2.70841	1.33945	1.8248	0.866705	1.456	1.46731	0.610608	0	0.40937	0.18937	0.585756	0.75102	1.51229	0.763881
CUL7	Cul7	1 hr	4.81682	1.05138	0.763977	1.29589	1.04097	0.979767	1.17375	0.78031	0.711999	0.785114	0.749533	0.876964	0.813969	1.29423	0.133804	1.14656	0.829501	1.08491	0.874594	0.602855	0.327785	0.315198
CUTA	Cuta	1 hr	0.27001	0.15892	0.158749	0.402015	0	1.26999	0	0	2.13917	1.29742	0.981295	0	0	0.987638	0	0	0.414016	0	1.9835	1.32382	3.6922	0.841746
CUTC	Cutc	1 hr	0	0.0216738	0.730026	2.88339	2.77757	1.28615	2.57307	0	23.9124	1.52278	1.33179	0.105564	2.34944	1.13979	0.733341	0	0.615792	0.122138	0.410273	0.055587	0.0864404	1.25198
CUX1	Cux1	1 hr	0.277381	0.805084	1.30426	0.835133	1.36855	0.739965	1.02085	0.123532	0.640021	0.895242	0.724656	1.2349	0.738626	0.62122	1.32654	0.196373	1.10765	0.891727	0.665942	0.800253	0.522738	0.589274
CWH43	Cwh43	1 hr	0.419267	0.189802	0.468248	0.307196	0	0.490343	0	0	0.0966311	0.385992	0.112071	0.428052	0.342601	0.348458	0	1.51788	0	0.49407	0	0	0.189269	0
CX3CL1	Cx3cl1	1 hr	0	0.171395	0.258947	0.728361	1.57204	0.584281	0.668395	0	0.381229	1.05831	1.80729	1.93943	0.645784	0.780639	1.15246	0	0.0104013	0.392173	0.337544	1.24019	0.357171	0
CXCL10	Cxcl10	1 hr	0	0.937983	0	0	0	0	0	0	0.636902	0.0663922	0.502573	0	0.253989	0	0	0	2.21024	0	0.247041	0	0.101904	0
CXCL16	Cxcl16	1 hr	5.57697	1.7769	1.29994	0.0527365	0.68378	1.36613	0.541715	0	0.0810778	1.06442	1.05921	0.0742616	1.69456	1.15105	0.426197	0	0.179017	1.1968	0.0936342	0.946566	0.598039	0
CXorf56	C330007P06Rik	1 hr	5.51009	2.45748	1.31609	0.348319	0.902397	0.71262	1.05059	0	2.10898	1.35296	0.763287	2.5334	2.51051	1.25053	5.46723	0	0.0766375	2.32691	2.86591	1.79862	2.39883	3.18136
CXXC1	Cxxc1	1 hr	0.737665	3.88528	1.80402	1.19029	1.20927	1.54303	2.98114	1.10879	0.527812	1.26279	0.79925	3.56089	0.656821	2.61057	1.36118	1.5826	2.40114	1.31675	4.17912	5.22839	0.949335	3.99685
CXXC5	Cxxc5	1 hr	0	1.98739	0.022252	0.304513	0.810389	1.79452	0.980294	0.412484	1.59025	0.874295	1.04009	0.371159	1.47192	1.25631	0.714859	0.399714	0.264996	1.24282	1.11567	1.07347	1.69186	1.59628
CYB561	Cyb561	1 hr	0.979934	0.842619	2.48156	3.21568	1.22024	0.709568	0.76876	1.15168	0.274215	0.476028	0.609078	0.88475	0.502658	0.667541	0	0.566011	0.393014	0.94623	0.513789	0.803297	2.53212	0.377618
CYB5A	Cyb5a	1 hr	0.0180215	0.00560198	0.147475	0.899884	1.72261	0.923216	0.776772	1.64149	0.182593	0.465308	0.441288	0.0843996	0.560594	0.440892	0.455848	0.553935	0.114101	4.30557	0.73563	0.732115	0.393697	0.292968
CYB5B	Cyb5b	1 hr	5.40093	0.634241	0.737475	0.174605	1.0479	1.1546	0.476204	1.70882	0.902704	1.0195	1.15788	0.371514	1.17126	1.22069	1.62825	0.963697	0.21985	0.203828	0.553948	0.208561	0.476569	0.561959
CYB5R3	Cyb5r3	1 hr	0.346847	0.229257	0.695708	0.912884	0.89018	0.974699	1.04485	0.550068	0.969284	1.2607	1.15036	1.25513	1.03973	1.04427	1.95468	0.148464	1.01238	0.210511	0.315095	0.22921	0.418244	0.599201
CYBA	Cyba	1 hr	0.0683679	0	0.349859	0	2.00913	1.43943	2.567	1.21849	0.883269	0.80217	1.33418	0.161196	2.24271	1.37718	1.62599	2.0782	0.838459	4.08293	0.831843	0.113178	0.071275	0.113378
CYBB	Cybb	1 hr	3.13451	1.45018	0.0988022	1.06443	0.114311	0.412382	0.183079	2.68937	0.143135	1.00512	1.35252	0.0313201	7.31522	2.2633	0.44234	2.85596	2.42663	0.72581	2.75761	0.342025	0.941874	1.42007
CYC1	Cyc1	1 hr	2.35617	0.0559614	0	0.303592	1.16619	1.12659	0.97712	0	2.81624	0.583701	0.500936	1.83284	0.6655	0.316511	0.612134	0	0.198913	0.0289164	0.367341	0.688198	1.52955	0.372653
CYCS	Gm10053	1 hr	0.0949047	0.277593	0.122909	0.570266	0.458906	1.19699	0.610568	0.711127	2.31855	0.422553	0.555605	0.308291	0.775693	0.361996	0.232744	0.797475	0.474015	0.60973	0.47216	0.0337791	0.84026	0.257158
CYFIP2	Cyfip2	1 hr	0.15552	0.270509	0.235237	0.312397	0.82928	0.847405	0.19228	0.06062	0.0330116	0.230158	0.50363	0.202715	0.251943	0.411074	0.0909714	0.356808	0.398951	0.350626	0.25707	0.104472	0.193549	0.0250171
CYHR1	Cyhr1	1 hr	0.506932	0.269312	3.57254	1.05977	0.976914	1.69787	2.82842	0	2.08074	1.33832	1.13438	0.0588365	0.967392	0.911966	0.337671	2.46559	1.02594	0.0680742	0.530382	0.325591	0.833091	0.331417
CYP1B1	Cyp1b1	1 hr	0	0.026457	0.137964	0.176951	0.225555	0.771676	0.0690679	0.214795	0.147383	0.744278	3.35596	0.045893	1.15486	0.773731	0.166876	0.402306	1.44032	1.20772	0.269079	1.06707	1.05052	0.499971
CYP24A1	Cyp24a1	1 hr	0.0656204	0.263059	0.275471	1.28239	1.04463	3.2027	11.1958	0.724134	0.0257863	0.596645	10.2489	1.08004	6.35536	0.965928	0	0.424127	0.157316	0.0176078	0.0307896	2.09774	2.43786	0.108822
CYP26B1	Cyp26b1	1 hr	8.1924	0.0396916	1.72294	0	0.099094	0.228159	0.962048	0	0.0980139	1.4289	0.0837033	4.5297	0.580793	0.587544	0	0	7.94804	1.53231	0.857284	0.0588624	4.02289	0.629665
CYP2A6	Cyp2a4	1 hr	37.9473	1.91231	2.84408	1.4433	0.641606	0	0	0	0.454002	0.0787938	0.622846	0	1.48833	0	0	20.7453	4.12104	11.3763	1.01431	0.506531	0.621595	0
CYP2J2	Cyp2j13	1 hr	5.17519	0.026314	0	0.19751	1.63363	0.166862	0.224752	0	5.80486	0.0727504	0.0959686	0.988786	0.242398	0.282024	0	0	0.308957	0.0566524	0	1.15751	0.0684163	1.12376
CYP4A22	Cyp4a10	1 hr	1.93728	0.115586	1.0101	0	0.922693	0.0206983	0	0	0	0.0129676	0.0716958	0.398254	0	0.0374065	0	1.2712	0.0700748	0	0	0.860599	0.343142	0.452618
CYP4B1	Cyp4b1	1 hr	3.33622	1.60816	1.85006	1.5724	7.37081	0.39231	0.763585	0	2.52846	1.3389	0.0862452	6.12972	0.346032	0.170387	0	14.3809	6.93012	0.192474	1.6923	0.425967	0.138834	3.81793
CYP4F2	Cyp4f15	1 hr	0	0.203758	0.38153	0.0391791	1.6807	0.0221215	0.61847	1.33182	0	0	0.0351812	0.776652	0	0.0505064	0	0	1.60235	0.353145	0.0695629	0.305304	0.132996	0.310768
CYP4F3	Cyp4f18	1 hr	0.487951	0.461301	0.773393	0.534738	2.43394	0.0106898	0.28763	1.86241	0	0.0467864	0.018645	0.60181	0.0163579	0.180185	0	0.384633	0.00323179	0.171733	0.130564	0	0.35689	0.306921
CYP4F8	Cyp4f16	1 hr	9.2772	1.20078	0.805699	0.580311	0	0.215026	0	0	0	0.240933	0.0336788	3.06865	0	0	0	23.1218	15.5751	0	0.676166	1.46244	0.286269	0
CYP4V2	Cyp4v3	1 hr	0.351282	0.266054	0.519168	0.0620032	1.52457	1.11987	1.1978	0.312131	0.779374	0.753245	1.31206	0.812304	1.0937	0.894131	1.33989	0	0.136656	0.531403	0.724131	0.0696758	0.0564042	1.20792
CYP51A1	Cyp51	1 hr	0.499167	0.037782	0.881385	0.101635	0.344224	1.29057	1.08137	1.91347	0.319159	0.594602	0.77302	0.450681	1.24919	0.777683	0.506691	0.132846	0.671332	0.73439	0.642558	0.279629	1.69028	0.327108
CYP7B1	Cyp7b1	1 hr	0	0.0636127	0.277856	0.134427	0.689238	0.794259	0	0	0.494799	0.843469	1.36137	0.274555	1.81026	0.564113	0	0	0.0195039	4.4769	2.82897	0.121524	1.18494	2.95319
CYSTM1	Cystm1	1 hr	0	0.0118309	0.23042	0.404745	0.664139	1.17448	0.512752	0	1.57294	0.412471	0.572631	0.974156	0.129013	0.0639028	0	0.159516	0.0612469	4.62241	0.441123	0.13521	0.181487	0
CYTH1	Cyth1	1 hr	0.335642	0.434807	1.00364	2.67834	1.1388	1.21613	1.64733	0.668519	1.17695	1.40457	1.31487	2.58649	1.63017	2.24105	0.838214	0.578727	1.82982	0.600472	1.45171	0.986071	1.08655	0.576196
CYTH4	Cyth4	1 hr	4.55696	0.961494	7.82329	5.02246	0.972038	0.884025	1.46023	2.01604	0.612881	1.56085	1.37749	2.15746	3.42769	5.09558	1.14142	1.13408	4.42127	1.74169	1.9019	4.13614	1.81802	1.41485
CYTIP	Cytip	1 hr	0	0.854912	0.0913512	0.651942	0.248792	0.609791	0.19313	1.10532	0.0663838	0.506544	0.271704	0.469093	0.303133	0.609351	0	1.91279	1.49481	0.389197	0.385672	0.246736	0.261129	0
DAB2	Dab2	1 hr	0.362627	0.0766703	0.0417115	0.0339668	1.5984	0.54556	0.508677	0.0899486	0.181439	0.542978	0.87471	0.659627	0.953245	0.776587	0.448416	0.383638	0.656376	0.646385	0.150185	0.181176	0.761492	0.146946
DAB2IP	Dab2ip	1 hr	0.551395	1.06315	1.18577	0.47872	0.770801	1.25483	0.842858	0.918404	0.761569	1.0331	0.810509	0.621035	1.06163	0.811182	1.46666	0.203722	0.275634	1.24272	1.10557	0.763986	0.731746	0.156199
DACT1	Dact1	1 hr	3.87829	1.40816	0.075396	1.05991	0.965117	0.475649	0.43189	2.37231	0.64523	1.99145	1.20015	0.287159	1.4678	0.990451	9.74681	2.68698	1.09033	1.03712	0.0983057	1.56671	2.09727	0.748263
DACT2	Dact2	1 hr	0	0.0923496	9.77209	1.78543	1.06422	0.234329	0	0	0.677858	0.728745	0.361231	9.35997	0.40772	0.358718	2.24717	2.38538	1.51717	1.16599	6.26658	5.74955	1.41666	0
DACT3	Dact3	1 hr	2.93271	2.04703	2.0987	0.0781476	1.30246	1.72446	2.01491	0	0.634732	3.35687	1.51129	5.65615	3.14327	2.43256	29.9123	0	3.38292	6.47757	3.84096	6.91954	7.17525	2.68003
DAO	Dao	1 hr	1.79352	0.0234749	0.20856	0.184286	0.561003	0	1.01741	0	0	0.00526988	0.00415203	0.256787	0.359789	0.209039	0	0.606356	0.121527	0.357553	0	0.365858	0.0541361	0
DAP3	Dap3	1 hr	0	0.65199	0.249352	1.042	0.997842	1.05541	1.40971	0	1.72386	0.924073	1.31643	0.897422	1.37296	1.11202	0.472923	0.833408	0.519258	1.4408	0.868768	0.601126	0.753281	0.203104
DAPL1	Dapl1	1 hr	4.5435	0.838313	0	3.44815	2.90641	0	0	0	0	0.56942	0.158172	0	0	0	0	0	0.25703	2.67311	0	0	0.521968	0
DAXX	Daxx	1 hr	4.50427	8.19327	1.84395	5.24282	0	2.85765	0	0	1.80492	3.07849	1.57999	0	0	3.62426	0	0	5.25513	0	8.46199	7.78519	6.26041	6.88666
DAZAP2	Dazap2	1 hr	0.577224	0.35459	0.20547	0.178905	0.78907	0.932651	0.407141	0.522515	0.537392	0.643878	1.00085	0.273864	1.74713	0.532401	0.194619	1.1746	1.30724	1.6646	0.423435	0.196261	0.934841	0.0364186
DBI	Dbi	1 hr	0.218769	0.176746	0.561486	0.432865	0.771398	0.973758	0.44056	0.647451	0.944919	0.416027	0.387679	0.697454	0.677045	0.376433	0	0.349105	1.20118	0.337634	0.322082	0.538668	1.11913	0.57016
DBN1	Dbn1	1 hr	0.114915	5.19805	2.52685	2.52685	0.833783	2.33758	2.26345	1.42383	0.480583	1.62646	0.806186	2.10934	2.16432	1.86199	0.996721	0.585293	1.70465	0.855444	3.38953	3.63076	1.05612	3.33773
DBNL	Dbnl	1 hr	1.07554	2.12392	0.589611	0.910702	0.835658	1.37458	1.50871	0.770008	0.427329	1.19744	0.824243	0.830589	1.48099	1.99166	1.13073	0.717154	1.70141	0.28543	1.6537	1.82403	1.06051	1.72654
DBP	Dbp	1 hr	2.78399	4.08148	0.121596	0.543884	0.679147	0.588186	2.46539	0	6.91354	0.723921	0.384112	3.59745	0.56085	0.490626	0	1.93941	2.80991	0.568863	6.19763	0.102744	0.640972	0.533044
DBR1	Dbr1	1 hr	0.204607	1.41455	0.527718	1.50875	0.508217	0.794126	0.726024	0	1.64375	1.10164	1.26094	3.63132	0.416414	1.13794	0.712824	0	0.168606	0.202807	0.156605	0.121504	0.533418	0
DBT	Dbt	1 hr	0.369801	0.653197	0.109767	1.41896	1.13209	0.826923	0.538072	0	1.11153	0.537734	0.725265	0.0776191	0.542223	0.244346	1.17611	0.152969	0.73212	0.187579	0.126759	0.406776	0.719183	0.112567
DCAF11	Dcaf11	1 hr	0.127711	1.24575	0.233836	0.684343	1.04205	1.35578	1.08326	0.392201	1.33571	0.678277	0.860938	0.883557	0.786176	0.533496	1.17783	0.341574	1.5487	0.924503	1.52027	1.4359	1.62737	0.605677
DCAF13	Dcaf13	1 hr	0.804538	1.41369	0.331504	0.0606016	0.810332	0.536106	0.549499	0	0.652084	0.317256	0.844908	0.225024	0.336538	0.438934	0.369594	0.301013	0.566311	0.176296	0.301583	0.940749	0.261404	0
DCAF5	Dcaf5	1 hr	1.01681	0.770898	0.077821	1.38795	1.51013	1.17512	1.01347	0.510226	1.68515	1.18493	1.43549	0.713463	0.960273	1.08145	1.05856	0.360238	0.759563	0.995201	1.05731	1.19132	0.813193	1.39425
DCAF8	Dcaf8	1 hr	1.91574	0.504289	0.642889	0.430575	0.948255	0.940351	0.746602	0.521876	1.30354	0.858584	0.929487	0.617793	0.620129	0.952723	0.761431	0.954434	0.129719	0.528611	0.506557	0.489392	0.621989	0.620319
DCAKD	Dcakd	1 hr	2.27556	0.688683	1.50866	0.0834316	1.16693	1.03582	1.58129	0	1.03787	0.767832	1.45838	0.441182	1.10435	1.48873	2.74579	0	0.449749	3.08082	1.96288	1.43808	1.90608	0.210628
DCBLD2	Dcbld2	1 hr	0.654522	0.987061	0.269985	0.744387	0.624921	0.810515	0.591857	0	0.822691	1.5243	1.33663	0.832129	0.749749	0.939923	2.95934	0	0.740645	1.1984	0.943274	1.54742	1.41511	2.04489
DCDC2	Dcdc2a	1 hr	0.0733112	0.809786	0.265792	0.736934	1.00604	2.45905	1.24141	0.715265	0.0287188	1.15063	1.41921	0.47566	3.42069	1.18745	0.0356937	0.263074	0.103805	0.733521	1.04455	0.685851	0.648072	0.735358
DCLRE1C	Dclre1c	1 hr	1.68458	2.77746	2.2766	0.181361	1.1922	1.09932	0.294987	0	0.842527	1.36539	1.54408	0.0650636	2.26513	1.78171	0.451988	2.14883	1.03552	2.59987	0.252868	0.36005	0.721201	2.13799
DCP2	Dcp2	1 hr	0	0.0677964	0.0880498	0	1.821	1.13086	1.15454	1.70841	1.12877	1.53678	2.18698	2.42413	3.49537	1.48049	0.308555	2.56638	0.192169	5.20711	0.578599	0.159745	1.48582	0
DCST1	Dcst1	1 hr	2.43891	0.183208	7.2929	6.72114	0	0.108631	0.247228	0	0	0.0851338	0.177078	0	0	1.02161	0	3.67335	1.28654	1.62231	0.547921	2.35037	1.7827	0
DCTN1	Dctn1	1 hr	0.985703	0.867931	0.573296	0.670903	1.28113	1.3091	1.1016	2.02582	1.06511	1.37504	0.87414	1.09627	0.904013	1.27869	1.32834	0.861573	1.39205	0.835212	1.27012	1.0415	0.971369	0.998522
DCTN2	Dctn2	1 hr	0.640122	0.408905	0.486086	0.016059	0.849927	1.22142	0.948139	1.70488	1.35754	0.902584	0.693161	0.464565	0.935576	0.928857	2.07588	0	1.95959	3.09399	1.0357	1.11075	0.250663	0.808906
DCTN3	Dctn3	1 hr	0	0.328892	0.305288	0.770422	0.704817	0.90597	1.00403	1.30619	2.17641	0.574649	0.935649	0	0.97765	0.54688	1.81611	0	0.749421	1.2366	0.140755	0.124094	2.58583	0.852168
DCTN6	Dctn6	1 hr	0.139117	0	0.0828177	0.0913851	0.716598	0.909363	0.148093	0	2.17162	0.817162	0.934657	3.03917	2.07167	0.877541	0	1.10988	0.492623	0.792684	0.065275	0.145849	0.203577	0
DCTPP1	Dctpp1	1 hr	0	0.0453038	0.13751	0	0.423724	0.923132	1.60962	0	2.75234	1.15072	1.28183	1.26264	0.949248	1.25092	3.3237	0	0.22492	0.360298	0	0.116191	5.02872	0
DCUN1D5	Dcun1d5	1 hr	0.233547	1.17724	0.205932	0.296743	0.803371	0.528815	0.777113	3.42431	1.00795	0.682703	0.556312	1.44996	0.457653	0.339935	0.529346	3.46544	2.42964	0.756048	1.05539	0.178494	1.82147	0.95608
DDA1	Dda1	1 hr	0	0.427545	0.0483377	0.163374	0.794575	1.13687	1.19364	0	1.28882	1.14662	0.681225	1.93051	1.11102	1.41341	1.48536	0	1.78962	0.892562	1.14006	0.847035	0.624644	1.61032
DDAH1	Ddah1	1 hr	0.0303135	0.112035	0.171276	0.494467	1.02142	0.86893	0.794118	0	0.310815	0.492503	0.916027	0.0614739	0.718883	0.42131	0.209596	0.789691	0.331081	0.642551	0.873915	0.630367	0.689051	0.261832
DDAH2	Ddah2	1 hr	0.990796	2.1289	1.66288	4.68988	0	4.54807	0	0	1.42975	4.06002	3.02585	0	0	5.71601	0	0	1.51189	0	6.74925	5.47921	4.5187	2.82118
DDB1	Ddb1	1 hr	0.173094	0.989853	0.597472	0.509977	0.720872	0.961867	0.433278	2.41302	1.05909	0.66495	0.66671	0.700754	0.615035	0.399606	0.318846	0.0642463	0.740161	0.824119	0.406036	0.368896	0.757403	0.360977
DDC	Ddc	1 hr	0.59355	0	0.287012	0.318933	2.1639	0.0536242	1.08274	3.23274	0.0481984	0.0232477	0.0350102	1.00967	0.0168318	0.291923	0	1.53304	0.236121	0.136793	0.263606	0.392241	0.0893077	0.0447925
DDHD2	Ddhd2	1 hr	0.125498	0.0693483	0.913956	0.705367	1.28632	1.2319	0.550705	0	1.20972	1.2919	1.3163	0.467342	1.12586	1.25099	2.12372	0.31082	1.37182	0.538323	0.617513	0.853769	0.296125	0
DDIT3	Ddit3	1 hr	1.15891	4.37374	0.395368	1.50987	1.22281	1.00383	2.31183	2.4608	1.25396	0.630436	0.675977	1.37121	0.145799	1.70008	2.53647	0	1.08211	0.171402	2.30605	1.94738	0.0250362	0.264183
DDIT4	Ddit4	1 hr	0	0.611625	0.0213755	0.04591	0.812218	0.371913	1.10495	0	0.301522	1.32592	0.378916	0.124726	0.554185	0.388077	0	0	0.380074	0.274513	0.58151	0.721925	0.207911	0.518173
DDO	Ddo	1 hr	2.82749	0	2.58296	0	0.817726	0.174097	0	0	1.43366	0.167502	0.329465	4.18069	0.153785	0	0	0	2.05539	1.02506	0	3.1886	0.0348193	0
DDOST	Ddost	1 hr	1.80373	0.0597589	0.52223	0.0116037	1.30419	1.38174	0.909212	0.567033	0.831725	1.30947	0.913402	0.899284	1.68692	0.637622	1.62922	2.16512	1.38548	1.38322	0.607774	0.291446	1.44221	0.234007
DDR1	Ddr1	1 hr	16.4081	4.87915	0.7812	1.9367	0.0399263	5.4564	0.290533	0	0.672671	2.19575	3.19587	0.0807567	0.834636	3.46772	0.119327	0	2.35279	0.00919059	4.66616	4.70262	5.21604	3.93789
DDRGK1	Ddrgk1	1 hr	0.439289	5.44969	2.64686	2.86442	1.15576	2.20134	1.95842	1.69342	0.80011	1.7192	0.753108	2.89174	1.60995	1.77056	0.706915	1.18921	2.30118	2.0881	3.42587	2.89174	1.77267	2.5493
DDX24	Ddx24	1 hr	0	0.165731	0.622187	0.875827	0	2.03774	0	0	1.9647	1.88375	1.95535	0	0	1.8654	0	0	0.702293	0	1.45267	1.41488	1.05158	0.950064
DDX27	Ddx27	1 hr	0.907006	1.82664	0.73978	0.713466	0.958649	1.41738	0.52596	0.298858	0.542427	1.06883	0.67454	0.159914	0.710135	0.960408	0.258109	0.450497	0.598972	0.323663	1.52718	1.27647	0.295547	1.15058
DDX28	Ddx28	1 hr	0	6.42682	2.53234	0.87028	0.685606	0.785884	0	0	0.905218	0.343484	0.54177	1.85173	0.766826	0.104361	0	0	0.0294933	0.217343	0	1.69655	0.617091	0
DDX39A	Ddx39	1 hr	0	0.113512	0.991973	0.759194	0.592539	1.03691	2.43701	3.45421	0.498374	1.17895	1.29528	3.71772	1.02528	1.54251	1.61635	1.17173	0.528742	1.04769	2.62999	3.6085	0.79948	0.601233
DDX3Y	Ddx3y	1 hr	0	0.0195294	0.0826346	2.91121	6.43474	4.13173	3.63207	0	4.64667	4.56536	6.19773	1.8533	0.0437087	0.0398559	0.431108	0.757528	2.01498	0.0243121	0.0693493	0.223193	2.29862	0.150257
DDX46	Ddx46	1 hr	0.251769	1.64916	1.62557	0.91895	1.2865	1.75408	0.768247	0.447576	1.24393	1.4823	1.30189	0.645319	1.30972	1.65938	0.436161	1.59266	0.487693	1.11437	2.80873	1.55621	0.695162	2.06795
DDX47	Ddx47	1 hr	0	0.460729	0.171882	0.330083	0.696224	0.990055	0.722118	1.08181	1.17796	0.770781	0.932598	0.0404543	1.03657	0.905726	0.486624	0.193672	0.0165139	3.68124	0.921263	0.75456	1.21656	0
DDX49	Ddx49	1 hr	0.865866	1.59439	0.114516	2.71948	0.866603	1.73983	2.88702	0	1.75677	1.04132	1.02052	4.52412	1.33295	1.03156	0.999714	8.89027	0.60664	4.40758	1.62882	4.01395	1.59236	1.58242
DDX5	Ddx5	1 hr	0.023052	0.353209	0.172494	0.18395	1.07813	1.3198	0.550111	0.156105	0.287178	1.52591	2.08263	0.425932	1.24224	1.07813	0.346897	1.1713	0.199792	1.18723	0.541858	0.317534	0.424596	0.33334
DDX54	Ddx54	1 hr	0.0226216	1.59204	1.52816	1.02534	0.798425	1.19427	0.925431	0.935681	1.06126	1.2214	0.728138	1.03884	0.785091	1.22535	1.47933	0.416344	0.639841	1.5869	2.28532	1.35584	1.48477	1.32466
DDX56	Ddx56	1 hr	0.355658	0.774836	1.00147	0.680849	1.1674	0.978345	1.96584	0.453137	0.661763	0.904648	0.793983	0.839923	1.01826	0.96847	1.33617	2.23167	1.4251	1.47724	0.400755	0.727813	0.520752	1.48627
DDX58	Ddx58	1 hr	0.083904	2.34712	0.166055	0	0.770544	0.564764	0.813993	0.808443	0.728044	0.618582	1.03467	0.117422	1.19182	0.664514	0	3.33915	0.176352	0.252223	0.444348	1.04884	0.524163	0.897824
DDX6	Ddx6	1 hr	0.0300533	0.444522	0.0912845	0.368015	1.25402	1.09683	0.68534	0.697633	1.57464	1.10784	1.65879	0.869662	1.3853	0.957101	1.83827	1.70812	1.65264	1.72766	0.396368	0.259049	0.307778	1.51511
DDX60	Ddx60	1 hr	0.672563	0.186121	0.890895	0.170015	0.392576	0.622333	0.662849	0	0.438225	0.737891	1.08311	0.080931	0.862056	0.411248	0.675482	1.08225	1.94088	0.97399	0.00890845	0.347379	0.295036	0.432588
DEAF1	Deaf1	1 hr	1.94081	0.801168	2.99197	3.82484	0.410855	1.21154	1.02261	0	0.659067	0.734121	0.655428	2.37892	0.668853	1.64528	3.1868	0	1.67909	0.0546729	1.56756	3.62839	2.04918	2.74828
DECR1	Decr1	1 hr	0.0447037	0.124213	0.0266125	7.33521	1.07656	2.08633	0.764617	0.493314	1.84085	1.03474	0.829837	1.40555	0.763241	0.793065	0.588031	1.29143	1.65174	0.908429	1.20602	1.42908	1.24213	0.645123
DECR2	Decr2	1 hr	0	5.31222	1.89767	0.115415	0	1.10704	0	0	2.2023	0.513478	0.319942	0	0	0.513871	0	0	7.31078	0	0.125622	2.7095	1.30882	1.42502
DEDD2	Dedd2	1 hr	0.527025	0.714516	1.07768	5.04776	0.769581	0.833565	0.914268	6.07127	0.939683	1.02016	0.937008	1.50973	1.00166	1.28434	1.44531	10.6105	2.00533	0.499158	3.3784	2.04033	0.613525	2.19415
DEF6	Def6	1 hr	0	4.09584	1.35619	2.9047	0.378556	1.21217	1.37935	2.02384	0.40172	1.63812	0.581397	1.84462	1.2329	8.42958	0	1.88196	4.04144	0.864857	7.03727	4.30661	3.1432	7.10951
DEF8	Def8	1 hr	0.232723	1.92321	0.614002	1.79748	0.944881	1.20112	1.56034	0.891839	0.435643	0.783885	0.819884	0.511516	0.726148	1.81302	1.0702	1.0738	0.355077	2.06561	0.719131	1.02718	1.49376	1.2317
DEK	Dek	1 hr	0.282673	7.02451	4.58723	8.00768	0.80395	1.65865	1.05563	0.886846	2.33858	1.54672	1.80287	1.6433	3.32666	2.57937	3.38683	0.184772	3.74906	1.87277	5.23772	5.55847	7.93869	6.08464
DENND4B	Dennd4b	1 hr	3.03043	2.04951	2.4538	0.79525	0.951474	0.914848	2.30306	2.22122	1.66251	1.26064	1.34802	0.582392	1.96608	1.80771	2.06318	0.823736	2.20686	2.75291	1.90538	0.900831	1.16574	2.98493
DEPTOR	Deptor	1 hr	0	0.066787	0.123001	0.0406714	1.02873	2.3349	0.517238	0.352227	2.55408	1.22948	2.76347	0.269016	1.39202	1.21866	0	0	0.606264	0.301546	0.949821	0.63601	0.438785	0.829428
DERA	Dera	1 hr	3.23155	0.0825476	0.0824585	0.395284	0.996359	0.902235	0.0646489	0.783267	0.727167	0.580683	0.695376	0.143189	0.644708	0.355124	0.591012	0.747113	0.0677656	0.761895	0.0284954	0.204009	0.840169	0
DERL1	Derl1	1 hr	1.81277	0.00831233	0.0905555	0	1.29604	1.32078	0.401045	1.49573	1.76358	0.965012	1.47187	0.231669	1.26729	0.481137	0.747034	0.245165	0	1.66814	0.0793094	0.596043	0.386181	0
DET1	Det1	1 hr	2.64614	0.41038	1.56941	0.615462	0.19512	0.398903	0	5.65784	1.59301	0.533819	0.662023	0.88378	0.10828	0.407132	0.842633	0	2.34534	2.17318	0	0.04721	0.72201	0
DEXI	Dexi	1 hr	0	1.15959	0.629846	0.421951	0.44989	0.956539	1.021	0	5.06583	0.837961	0.509949	4.71736	0.261794	1.54371	0.522708	0	0.44461	2.50882	0.698484	1.6988	1.15167	0
DGAT1	Dgat1	1 hr	4.37026	2.0528	0.804553	2.48855	0.947156	0.953208	2.77855	3.16072	1.17461	1.00894	0.757775	5.4783	1.568	0.987882	2.6908	0.919543	1.59738	1.32541	3.64148	2.8421	1.09052	2.52701
DHCR24	Dhcr24	1 hr	0.332383	0.0860358	0.314039	0.384657	0.618569	2.15213	0.105618	1.143	1.24406	0.703929	1.54713	0.478571	0.723961	0.754516	0	0.69487	0.0561568	0.751139	1.23764	0.296933	0.222208	0.483635
DHFR	Dhfr	1 hr	0.454152	0.546424	0.0743945	0.553057	1.28604	0.912341	0.870819	0	1.6436	1.35265	0.815456	1.42907	0.567474	1.51182	2.66667	1.27105	0.471453	0.764129	0.150519	0.872261	1.88264	0.326125
DHODH	Dhodh	1 hr	0	1.14658	0.151256	2.12634	2.16379	0.587274	0.866442	0	1.51524	0.514077	0.903648	0.576088	0.361848	1.23096	2.46582	2.09352	3.68827	0.451337	0.197217	0.909241	2.29438	0
DHPS	Dhps	1 hr	0	0.416593	0.346582	0.55175	0.906872	1.2034	1.10698	2.15715	2.10412	1.20996	0.95881	3.39362	1.65038	0.714018	0.539237	0.768239	0.239827	3.63593	0.4299	2.3079	2.78894	0.112316
DHRS13	Dhrs13	1 hr	0	3.22182	0.754524	2.83441	0.379766	1.00225	2.65941	1.98343	0.498624	0.547379	0.433265	0.423777	0.112006	0.535256	0	1.50272	1.27423	0.489136	0.692064	0	0.058243	0
DHRS7	Dhrs7	1 hr	0.320837	0.475286	0.0102329	0.302827	0.995187	0.768561	0.279768	0	2.33918	1.01668	0.441926	0.217893	0.692838	0.524404	0.620525	2.00368	0.0383394	0.809698	0.897087	0.0770199	0.269399	0.334958
DHRS7B	Dhrs7b	1 hr	0	0.640332	0.366465	0	1.42545	0.873792	0.526688	0	2.38988	0.538474	0.97116	0	0.3081	0.131602	0	0	0.213537	0.855272	0.328303	0	0.139459	1.37775
DHX16	Dhx16	1 hr	5.57623	4.24854	3.91809	2.90705	0	2.0752	0	0	1.18922	1.85082	1.14907	0	0	1.96757	0	0	1.24928	0	3.90571	3.45265	1.69807	3.48572
DHX40	Dhx40	1 hr	1.00179	0.994838	0.541503	0.371385	0.615165	1.41308	0.125466	0.587959	0.853062	0.823183	1.24129	0.0276734	1.24744	0.523722	0.766366	0.189837	0.32319	1.67812	1.12893	0.153139	0.578133	0
DHX57	Dhx57	1 hr	3.09852	1.13556	1.75769	0.315334	0.533127	0.626126	0.53297	0.294698	0.443104	0.579724	0.571227	0.333033	0.735845	0.600243	0.163599	0.658705	0.782364	0.604942	0.238272	0.737098	0.400775	0.532696
DHX58	Dhx58	1 hr	0	0.439019	6.37353	0.444347	1.12106	0.881049	0.560647	0	0.547905	0.936882	0.737876	1.14817	0.741814	1.40787	2.95197	0	1.67244	6.63787	1.54201	0.866222	2.18583	0.540259
DHX8	Dhx8	1 hr	2.20146	1.11206	0.022601	0.692565	0.626542	0.962106	0.366667	0.518334	0.563427	0.797867	0.983798	0.541371	0.653358	0.577997	0.562809	0.188366	1.20356	0.449004	0.799211	1.11668	0.479963	0.728247
DHX9	Dhx9	1 hr	0.0762529	0.426499	0.430774	0.377224	1.04648	1.0911	0.547409	0.464358	0.70015	1.01675	1.32695	0.710774	0.935878	0.704938	0.540269	0.268328	0.646578	1.31417	0.470194	0.510469	0.659896	0.23701
DIAPH1	Diaph1	1 hr	0.0552466	0.891886	1.25566	0.514511	1.29113	1.58457	0.773217	1.26607	0.483698	0.821051	1.16202	0.70109	1.2891	0.818232	0.366944	1.08908	0.601193	0.607266	0.615289	0.821909	1.72749	0.787079
DIDO1	Dido1	1 hr	0.579597	0.882328	1.10458	1.08822	0.954271	0.972746	1.33265	0.517669	0.546386	1.24518	0.893097	1.00805	0.869222	1.65207	0.646079	0.227908	1.03612	1.21138	1.46527	1.16385	0.851711	0.602326
DIP2A	Dip2a	1 hr	0.591656	0.52592	0.894566	0.874777	0.898524	1.16096	2.07993	0.395191	0.700333	1.1623	0.986281	1.6978	0.923045	1.63037	0.660398	0.291037	1.0214	0.523628	0.591209	0.648792	1.30883	0.440692
DIXDC1	Dixdc1	1 hr	0.314805	2.11735	0.943349	0.828821	1.17155	0.793754	0.835696	1.00037	1.24265	1.11304	1.04642	0.126252	0.790983	0.504796	0.397836	0	1.76524	0.999094	0.646237	1.34262	1.09918	0
DKK2	Dkk2	1 hr	1.00415	4.20776	1.21611	0	0.188597	0.0705116	0	0	3.75538	0	0.159288	0	0.505475	0	0	0	2.05376	0	1.11544	0.973145	3.04899	1.54191
DLC1	Dlc1	1 hr	0.930156	0.770637	0.540274	0.619108	0.726689	0.456016	0.493403	0	0.796947	1.26404	1.67247	0.986188	2.54107	0.419311	0.911284	0.272525	1.22886	1.37451	0.121223	1.01643	0.0732471	0.764433
DLEU7	Dleu7	1 hr	0.732244	1.74723	0.230494	0	0	0.0615144	0	0	0	0.0870836	0.0251987	0.153415	0	0.0852308	3.37069	0	0.282003	3.89542	0.774118	0.080784	0.184173	0
DLG2	Dlg2	1 hr	2.61411	0.722093	0.688674	0.71141	0.270819	0.0597458	0.176072	0	0.269084	0.24857	0.160002	0.048941	0.0362188	0.326912	0.80777	0.215213	0.200542	0.0145788	0.461226	0.301438	0.178416	0.414051
DLGAP4	Dlgap4	1 hr	0.378502	0.435376	0.34007	1.28234	1.35765	0.923589	1.44592	0.9532	2.31761	1.27952	1.25207	0.743724	1.34892	1.75774	0.51102	0.117642	3.09441	2.10053	0.765544	1.44212	1.44855	3.60956
DLL4	Dll4	1 hr	3.49344	0.0644562	0.0881119	0.138462	1.73902	0.649988	0.407355	0	1.23704	0.82122	1.11377	1.07557	1.28695	0.0822522	1.62009	0.430142	0.438606	0.146708	0.569906	1.82886	0.107861	0
DLST	Dlst	1 hr	0.0936559	1.0359	0.215981	0.188056	1.59411	1.03309	0.763327	0.549242	1.67257	0.8405	0.911376	0.536448	0.972978	0.584376	0.769995	1.3102	0.492108	1.55563	0.391615	0.688288	0.641409	0.501247
DMRT2	Dmrt2	1 hr	0.981704	14.645	0.220515	5.6759	0.252613	0.838401	4.28546	2.86411	0.208194	1.25359	0.0314661	3.9006	0.937791	1.47215	0	2.34195	5.79772	0.141471	3.771	6.31148	7.19215	8.22428
DMWD	Dmwd	1 hr	0.195722	1.78939	0.393727	0.738215	0.78659	1.22894	2.4274	0	0.56921	1.74638	1.12361	0.3058	2.17497	2.61794	0.98262	5.22254	0.781715	2.57949	1.35716	1.34525	1.79136	0.530337
DMXL1	Dmxl1	1 hr	0.0778574	0.629964	0.13067	0.293309	2.02967	0.802393	0.503062	0.309284	0.557371	0.724265	1.06568	0.218246	0.786779	0.499763	0.32791	0	0.515504	1.1258	0.582308	0.109898	0.23817	0.22169
DNAAF5	Dnaaf5	1 hr	6.30407	0.78422	2.38472	0.920963	0.926082	1.03373	4.02254	0	1.56696	0.785297	0.730869	2.00723	0.917056	0.733968	0.894153	0.982531	0.508981	0.301644	1.34386	2.93722	0.0669571	1.65641
DNAJA3	Dnaja3	1 hr	0.436122	6.652	0.277246	0.532425	0	2.1453	0	0	4.86354	1.32192	1.41113	0	0	1.90699	0	0	1.70698	0	2.07264	0.712579	0.923942	0.178263
DNAJA4	Dnaja4	1 hr	0.658479	0.154701	3.66449	0.825425	0.42255	0.72338	3.25141	0	5.93643	1.4128	1.31655	0.260747	0.555699	0.667051	0.827793	0.161803	0.308422	1.43647	0.860447	0.563454	1.07833	1.32275
DNAJB11	Dnajb11	1 hr	0.186232	0.309466	1.03925	0.0677526	0.999087	0.928986	1.23217	0.837514	0.521824	0.838394	0.810272	0.604959	0.640127	1.15091	0.306061	0.621516	0.350036	0.228151	1.87277	0.890002	0.132394	1.0285
DNAJB2	Dnajb2	1 hr	0.112811	0.709525	1.53394	1.31269	1.26785	1.4197	1.19909	3.54311	1.76056	1.22215	1.23003	1.40286	0.990155	1.69159	1.07489	0.852777	0.0915378	1.41898	1.08542	1.80447	1.94543	1.60492
DNAJB4	Dnajb4	1 hr	0.447878	0.258226	0.39492	0.701578	1.12071	0.555491	0.148802	0	5.65268	1.48859	1.40723	0	1.23376	1.6409	0.880254	0.530031	3.33091	1.56825	0.48986	0	0.519281	0
DNAJB6	Dnajb6	1 hr	2.35289	1.68081	0.214821	2.43248	0.916075	1.15788	1.09748	1.49956	3.95897	1.33217	1.18063	1.22529	1.32083	1.05319	0.909381	0.258748	0.40747	1.1858	2.25343	2.13754	0.117922	1.29086
DNAJC10	Dnajc10	1 hr	0.649301	0.555831	0.155486	0.761325	1.20371	1.82724	0.686995	1.40792	0.668134	1.55257	1.89695	0.337215	1.67231	0.910793	1.21449	0.649301	0.893631	3.35234	0.644927	0.297626	0.368	0.412576
DNAJC12	Dnajc12	1 hr	0	0.137256	0.0971153	0	1.90217	0.348968	0	0	7.10819	0.270628	0.170923	0	2.47903	0.104885	0	0	0	0	0	0	1.45997	0.732249
DNAJC14	Dnajc14	1 hr	0	1.98692	0.766399	0.0155019	0.881802	0.935629	0.68777	0.648154	0.737204	0.899371	0.862769	0.8874	1.42187	0.619217	1.73053	3.9381	0.671062	0.654441	0.524052	0.454465	0.0428026	0
DNAJC17	Dnajc17	1 hr	0.95144	1.00053	0.563693	3.04421	0.910737	1.10284	3.33822	6.7024	0.978812	1.46625	0.979822	0.41219	1.06315	3.20237	1.67795	0.987801	0.545513	0.307855	2.22154	2.41183	1.18849	5.54694
DNAJC19	Dnajc19	1 hr	0.0934517	0.0116472	0.47822	0.0402856	0.51371	0.807768	1.01262	0	2.69503	0.749669	0.765701	0.324614	0.719112	0.789406	1.571	0	0.015758	1.04126	0.0438483	0	0.803246	0
DNAJC22	Dnajc22	1 hr	0.713042	1.79655	1.18201	2.46722	2.72928	0.381931	1.4081	4.57677	0	0.485863	0.532699	2.02505	0.740927	1.09847	0.537286	0.59728	0.397744	0.971968	3.12534	2.88247	10.0431	7.08334
DNAJC3	Dnajc3	1 hr	0.698066	0.254726	0.208311	0.307646	1.16319	1.30544	0.299957	0	0.474814	0.82602	1.09296	0.674949	1.12204	0.613106	0.525677	0.395511	0.309189	0.891077	0.297514	0.560623	0.362751	0.515366
DNAJC30	Dnajc30	1 hr	0	2.71101	2.62446	1.60756	1.47067	0.730082	0	0	1.38556	1.37941	0.805408	1.15669	3.42117	0.967286	2.52994	0	1.56374	5.40319	0.756519	1.35406	1.20739	0.409585
DNAJC5	Dnajc5	1 hr	0.313297	0.33068	0.362493	1.04112	1.44906	1.61386	1.07447	3.42667	0.69198	1.532	1.07805	1.67095	1.24535	1.43367	1.78838	2.07225	0.33869	0.787304	2.1649	0.647613	1.11872	1.13855
DNAJC6	Dnajc6	1 hr	0.807001	0.172884	0.0163145	2.60375	1.02567	0.521054	0.259325	0	0.129125	0.0951049	0.396671	0.882124	0.356201	0.148412	0	0	0.881112	0.541036	0.384783	0.106234	0.453898	0.229542
DNAJC7	Dnajc7	1 hr	0	1.77813	0.138634	0.246284	1.24028	1.58921	1.45585	0	1.41013	1.21847	1.22216	1.52243	1.22133	1.48171	1.25839	0.205925	1.69237	0.225429	1.26709	0.480174	0.494554	0.540394
DNAJC8	Dnajc8	1 hr	0.30193	0.555968	1.45264	0.150548	0.847754	0.896032	0.77951	0.483165	1.1805	0.749593	0.864254	0.0265786	1.24393	0.881973	0.680451	0.203448	1.28271	1.30832	1.44783	1.65526	0.657082	0.87337
DNAL4	Dnal4	1 hr	3.3505	0.101396	0.0880813	0.393976	0.515856	1.20344	0.640809	0	0.840869	0.835407	1.04366	1.09043	0.9508	1.52606	0	0	0.259806	0.230787	0.178211	1.03274	0.60701	3.36006
DNASE1	Dnase1	1 hr	0	0.173448	1.88683	0.845912	0.771497	1.278	1.20211	0	0.364932	0.510814	0.578651	0.768207	0.4668	0.707631	0	0	0.324775	0.0207593	0.059215	0.0811087	0.664978	0.128299
DNASE1L1	Dnase1l1	1 hr	3.11145	0.599935	1.1757	1.41856	1.61681	1.19143	1.71918	0	5.97145	1.20604	0.79072	0.148443	1.27271	2.09426	0.46658	1.36113	0.0911746	0.195814	0.426022	0.27255	2.53504	3.25146
DNM2	Dnm2	1 hr	0.0197279	0.839243	0.779471	0.455295	1.02242	1.93504	1.29329	0.272082	0.510808	0.740303	0.875467	0.518749	1.00253	1.13154	0.305187	0.114209	0.715252	0.894331	0.806326	0.697353	0.755547	0.309195
DNMT1	Dnmt1	1 hr	0.0429451	4.44345	2.67153	1.41935	0.992521	2.15234	0.881813	1.37802	0.484431	2.10509	1.63412	1.70031	1.9588	1.8722	1.67575	0.330778	2.53204	1.05146	5.80472	3.52026	0.527264	1.82044
DNPEP	Dnpep	1 hr	7.66743	1.19907	2.4457	0.149141	1.53108	0.999526	0.823375	0	1.60811	0.929091	1.04024	1.5643	0.85465	2.49998	1.59221	0	0.370008	0.862275	1.49528	0.892	1.32275	3.9203
DNTT	Dntt	1 hr	4.569	1.54946	0.968664	0.624423	0	0.0180033	0	0	0	0.0052754	0.0824805	0.0346669	0	0.119743	0	0.783523	1.27003	0.126693	0	0.0598716	0.113882	0.303964
DNTTIP1	Dnttip1	1 hr	3.49857	0.174957	0.540347	0.0845531	0.542046	1.17619	1.09183	0	3.39024	1.03257	0.656985	0.303485	1.62161	1.17733	2.18951	0	4.88842	0.127585	1.03445	0.432391	2.81196	1.16506
DOCK10	Dock10	1 hr	0.500061	0.794491	0.433663	0.946115	0.0799479	0.3261	0.273284	0.784191	0.1682	0.560698	0.694105	0.0762466	0.848755	1.25461	0.288733	1.04795	1.0119	0.789663	0.543575	0.512967	0.400705	0.198679
DOCK4	Dock4	1 hr	0.621192	0.608514	0.157283	0.903122	0.691825	0.232984	0.664799	0.44927	0.824121	0.62028	0.895531	0.289269	0.801735	0.839692	0.208753	0.222596	0.75807	0.451794	0.465909	0.278862	1.0964	0.389121
DOCK5	Dock5	1 hr	0.148389	1.37877	1.51174	0.304258	0.819114	0.580265	0.722062	1.40931	0.114729	1.19223	0.599476	0.350538	1.31145	0.773803	0.327371	1.54944	1.29143	2.47591	0.407741	0.368942	0.316608	0.0627459
DOCK9	Dock9	1 hr	0.618593	1.26151	1.11426	0.914346	0.616872	0.662481	0.518849	0.419974	0.547057	0.702773	0.851839	0.719517	0.751302	0.646859	0.657532	0.0956649	0.892344	0.876393	0.455781	0.696741	1.14705	0.286318
DOHH	Dohh	1 hr	0	0.371212	1.14647	9.66954	2.56044	1.28703	5.45046	0	2.7006	1.8933	0.89059	0.165784	4.18185	1.20133	2.59608	6.73628	0.654727	1.90772	3.32289	1.81041	2.34741	0
DOK1	Dok1	1 hr	27.5707	0.824474	8.49446	5.06017	0.348111	0.216467	0	5.10699	1.1848	1.80366	1.01787	0.280932	0.483149	1.27573	0	0	8.59692	3.23275	1.09183	1.55463	0.677222	35.8365
DOK2	Dok2	1 hr	5.7216	4.17226	0.558265	3.27201	0.166448	0.438953	0.178232	3.50205	0.236907	0.628969	0.54599	4.33011	1.90409	1.44746	0	2.86792	0.80892	1.28003	0.77946	0.742635	0.333879	0
DOK3	Dok3	1 hr	3.51635	0.17649	0	6.47469	0.295571	1.03794	0.793876	3.98742	0.654456	1.01203	1.4959	3.08792	2.71296	3.96905	0.779442	5.04571	0.249645	2.49284	2.90224	0.0715145	1.29546	0.371022
DOK4	Dok4	1 hr	3.46407	1.64716	0.0966827	2.02301	1.33757	0.768205	2.71318	2.34844	0.182335	0.953131	0.65494	2.17751	0.891761	0.982891	0.385916	0.346755	0.619184	0.673373	0.973489	0.733189	2.57416	3.5378
DPAGT1	Dpagt1	1 hr	0	0.0573945	1.36263	2.42072	2.73619	1.07839	0.732853	0	1.61056	1.10689	1.4825	0.627825	0.805865	1.41495	1.94438	2.12438	0.0901913	1.69294	1.69021	0.894495	0	3.8427
DPF2	Dpf2	1 hr	0.0882099	1.50254	0.721847	0.801908	1.30103	0.992426	2.50506	1.43192	1.61391	1.44693	0.971344	1.56553	0.780309	1.17699	0.945864	0	0.55849	0.502616	1.96002	0.788328	1.02593	0.798416
DPH2	Dph2	1 hr	0.680092	1.06387	0.266398	0.430092	1.68987	1.25086	1.02503	2.87514	2.15938	0.759206	0.986191	0.119102	2.05409	0.814154	0.683544	0	0.823648	1.91945	0.0920598	1.30063	0.287112	1.77589
DPM2	Dpm2	1 hr	1.7075	1.41982	0.0404046	0	1.59733	1.2151	2.15114	0	1.14857	1.07342	1.19625	0.433138	0.635161	2.5894	2.30468	2.31896	0.440411	0.713815	0.315156	0.0587214	2.1366	0.304651
DPP3	Dpp3	1 hr	5.56236	0.44586	3.75298	1.65292	0.722836	0.87142	1.66664	0.934872	0.605817	0.510162	0.736121	1.78302	0.993647	0.93349	0	0	0.458933	0.160807	1.61062	1.05263	0.23967	1.44588
DPP7	Dpp7	1 hr	0.658491	0.15952	0.446054	0.52127	0.733846	0.89777	1.98526	0.614871	0.58628	0.670444	0.671213	2.38881	0.436687	0.960334	1.06023	0.198526	0.168817	0.701481	1.32544	1.57569	1.2633	1.13265
DPY30	Dpy30	1 hr	0	0.0729013	0.0633284	0.21404	1.5945	1.19465	0.322779	0	2.43397	1.01571	1.0756	0.10162	1.50663	0.576092	0.583211	0	0.103584	0	0.644575	0.175503	2.31591	1.2052
DRAP1	Drap1	1 hr	1.2487	6.26817	1.3036	4.18598	0.742598	1.94073	1.74293	1.19507	2.71077	1.81087	1.13693	1.84327	1.27597	2.04601	0.832228	0.774725	3.30066	3.33404	5.12611	4.89465	0.849057	3.59384
DRG2	Drg2	1 hr	0.428257	0.100302	0.690427	0.124863	0.635569	0.661537	0.689345	0	1.012	0.652989	0.593696	0.920244	0.403479	0.532346	0	1.08352	0.0608086	1.33703	0.403804	0.746799	0.36074	0.392767
DST	Dst	1 hr	0.705415	0.270739	0.281954	0.187955	0.553379	1.01077	0.201816	0.153855	0.695256	0.99195	0.966717	0.272158	0.548416	0.816733	0.650183	0.325018	0.284382	0.57844	0.375016	0.187354	0.231181	0.165127
DSTYK	Dstyk	1 hr	0.77272	0.518491	0.326389	0.508781	0.663011	0.855153	0.406565	0.53505	0.630658	0.737184	0.893832	0.23481	0.75189	0.719981	0.467403	1.26224	1.18597	0.644639	0.680456	0.84774	0.18489	1.36909
DTNBP1	Dtnbp1	1 hr	0.120132	1.63428	1.12399	0.413062	1.11624	1.12821	0.817493	1.54938	2.25379	1.17736	0.9991	1.34452	1.68554	0.986946	1.53441	1.76393	0.225114	0.999628	1.26966	0.929522	1.94095	1.08735
DTX2	Dtx2	1 hr	1.86617	2.29188	1.47632	5.06985	0.363702	1.00596	2.09406	0	1.37406	1.6783	1.41015	0.738972	1.09388	2.76895	2.68404	0.733188	0.662391	1.97954	2.67686	2.29141	1.51057	4.93589
DTX3L	Dtx3l	1 hr	0	0.228097	1.29708	0.845616	0.729257	1.2582	0.461685	0	0.736814	1.24336	1.76659	0.173669	1.56302	1.20883	0.903306	0.26904	2.23888	2.01448	0.740294	0.16448	1.17104	0.805216
DTX4	Dtx4	1 hr	3.12715	1.73283	0.433027	2.17195	1.57448	0.489912	1.56564	1.49788	0.179258	0.656442	0.95897	0.947019	0.550561	1.15585	0.571355	4.17229	2.01342	0.828112	0.596032	2.74784	1.8445	2.99026
DUSP1	Dusp1	1 hr	0.103208	0.247477	0.202119	0.754905	0.163959	0.170145	0.83823	0	0.168887	0.317872	1.26487	0.0159871	0.323603	0.139673	0.270627	1.71254	0.300557	0.215904	0.154577	0.70331	0.164851	0.0407452
DUSP11	Dusp11	1 hr	0.423729	0.039548	0.0694108	0.120527	1.47915	0.712133	1.24859	0	1.43207	1.53995	1.49126	0.11138	2.22491	0.505784	1.33979	0	0.0454668	0.407049	1.00404	0.30374	0.0912026	0
DUSP15	Dusp15	1 hr	0	0.80762	0	0.190439	0.729653	1.60388	1.39139	0	0	0.491386	0.359039	1.2728	0.651686	0.939529	0	0	0.0369085	0.848678	0.177117	0.156151	0.155278	0.247003
DUSP2	Dusp2	1 hr	13.5019	0.668159	0.241774	4.71272	0	0.10683	0	19.7224	0.251145	0.529467	0.805914	0.387963	1.66899	0.853707	2.22657	0	0.39546	2.85631	0.759996	0	0.123698	4.60121
DUSP28	Dusp28	1 hr	0	0	0.513944	0	2.11155	1.07371	0	0	17.8347	2.34661	2.53984	16.9422	0	0.322709	0	0	0.129482	1.82271	3.20518	0	0	0
DUSP6	Dusp6	1 hr	1.04457	0.0179089	0.336531	0.115654	1.00103	0.88381	1.10812	0	0.250906	0.957496	2.18236	1.35475	1.34239	0.539319	0	2.94925	0.653043	0.0727815	0.401353	0.7289	0.165944	0.593468
DUSP8	Dusp8	1 hr	11.1833	7.37532	27.7945	12.3308	0	2.6895	3.15585	0	3.73924	1.82377	1.76947	0	0	1.80989	3.00442	0	0.254592	0	5.68789	11.3565	18.6232	8.20727
DVL1	Dvl1	1 hr	1.75099	0.852864	1.1028	0.553344	1.05087	0.968064	2.50419	1.49038	3.54521	0.792007	0.528388	0.815376	0.841371	1.27508	0.418059	0.557941	0.264604	2.78428	0.663618	1.15151	0.39283	0.470378
DVL2	Dvl2	1 hr	0.693216	0.715477	0.125694	0.754163	1.56248	1.16043	1.84754	12.4905	0.896824	1.60714	1.3225	1.64298	1.25069	2.35927	4.3853	2.52786	1.80003	0.0917592	0.903475	1.04817	1.07668	3.04149
DXO	Dxo	1 hr	0.650623	3.94507	0.352208	0.361268	0	3.82616	0	0	1.69875	2.41336	1.5034	0	0	2.14779	0	0	0.723669	0	1.79785	4.37259	0.770102	2.05549
DYNC1H1	Dync1h1	1 hr	0.510279	0.512126	0.619534	0.48891	0.87009	0.932211	0.500502	0.129986	0.599419	0.9185	0.779078	0.639568	0.884312	1.04547	0.523367	0.214445	0.415009	0.656694	0.564558	0.365389	0.375302	0.374636
DYNC2H1	Dync2h1	1 hr	0.467084	0.26637	0.278892	0.154349	1.10505	1.14146	0.519637	0	0.182375	1.31972	1.45356	0.423968	0.857603	0.646561	0.673759	0.512827	0.521583	0.916739	0.597795	0.142861	0.358126	0.177904
DYNC2LI1	Dync2li1	1 hr	0	0.872876	0.0161644	0.0193972	2.25956	2.06193	1.46676	0.811021	0.551313	1.32462	2.44502	1.01437	3.84098	1.12515	2.33737	0.761989	1.09681	0.285571	1.07493	0.402924	0.854772	0.926219
DYNLL1	Dynll1	1 hr	0.0912797	0.132254	0.469496	0.135905	0.200062	0.802392	0.676049	1.60449	0.781702	0.728151	0.756317	0.337764	0.801175	0.701202	0.854493	0	1.33228	2.56684	0.0932501	0.132776	2.92298	0.284561
DYNLT1	Dynlt1b	1 hr	0	1.71268	0.0368742	0	1.72276	1.66106	1.69424	0	1.68343	0.973478	1.38598	1.8764	1.87911	0.656606	0	0.487231	0.703805	0.749283	0.199366	1.6967	1.44104	0
DYNLT3	Dynlt3	1 hr	0	0.016666	0.723442	0	0.405767	0.726163	0.149087	0	0.429122	0.783077	0.729111	0.046937	1.40992	0.617664	3.73126	0	0.144892	0.807793	0.297721	0	0.37799	0.556668
E2F4	E2f4	1 hr	0.467341	0.241305	0.0168352	0.96385	0.868254	0.991778	1.56985	0	0.831452	0.963458	0.857749	0.972202	1.4047	1.84633	0.851093	0.163589	0.7846	2.41755	0.754976	0.397716	0.920522	0.320392
EAF2	Eaf2	1 hr	0.878743	2.58865	0.114735	0	1.40706	0.94367	0.834717	0	1.34924	0.489179	0.861399	0	0.956567	3.555	0	8.2818	1.46531	0.0813816	0.520308	0.317966	0.316187	1.03706
EBF1	Ebf1	1 hr	0	0.125365	1.17102	2.40469	0.588652	0.175114	0.528318	1.24181	0.596194	1.39575	0.820329	1.62564	0.35896	1.26933	2.69987	0.525738	2.89391	0.663871	1.683	0.799688	0.387804	1.24181
EBNA1BP2	Ebna1bp2	1 hr	0	0.2511	0.717496	0.0827366	0.929212	0.538392	0.722155	0.477569	0.613536	0.528082	0.556552	0	0.312311	0.543396	0.139979	0.122509	0.123501	0.2665	0.610689	1.03007	0.642697	0.211802
ECD	Ecd	1 hr	0.538719	0.24072	0.0272155	2.46564	0.815938	1.02227	1.28082	0	1.39643	0.96499	1.35065	0.897162	0.156964	0.777541	0	1.96447	0.510027	1.40814	0.0186711	0.177217	0.912352	0.517939
ECE2	Ece2	1 hr	0.986055	2.73477	7.35226	0.288653	0.267994	0.315105	0	0	0.0872718	0.0940296	0.190183	3.59668	0.287302	0	0	3.69998	1.04282	0.837191	0.83584	0.138052	0.76247	0.700877
ECH1	Ech1	1 hr	0.139	0.0416156	0.220489	0.0406902	1.14499	0.545113	0.455649	0.894641	3.23002	0.57693	0.411393	0.456602	0.620996	0.493318	0.452165	0.161754	0.379249	0.602869	0.225851	0.229362	0.124901	0.200784
ECHDC1	Echdc1	1 hr	0	0.209658	0.0605752	1.19888	1.5588	0.939308	0.378432	0	1.24781	0.578016	0.84838	0.974633	0.664365	0.877163	2.45434	0.705642	0.0836017	0.146466	0.136654	0.398711	0.300194	0
ECHDC2	Echdc2	1 hr	0.118527	0.746206	0.114014	0.403763	1.50124	1.09191	2.17499	1.95027	1.01801	0.974485	0.703639	0.699427	0.536829	1.49998	0.332767	0.343597	0.121084	1.07581	0.500128	1.05496	0.0681879	0.49346
ECHS1	Echs1	1 hr	0.0476254	0.261864	0.146172	0.361772	1.98237	0.64317	1.09248	0.867116	1.31525	0.320829	0.419316	1.43917	0.307101	0.481002	0.42875	0.712537	0.541086	0.759135	0.428085	0.113061	0.933429	0.186662
ECI1	Eci1	1 hr	0.0519945	2.66361	0.21827	2.35668	1.03798	1.08388	1.76103	1.91114	1.5253	0.546018	0.37837	1.71284	0.720223	0.935901	0.808049	0.992927	1.25892	0.508662	1.79724	2.97985	3.98101	2.79131
ECI2	Eci2	1 hr	0	0	0.0269785	0.495515	1.57353	0.973952	0.124726	1.83966	2.56064	0.4797	0.434913	0.387268	0.254436	0.510798	0	0	0	0.229517	0.515981	0.152236	0.527078	0.0751545
ECM1	Ecm1	1 hr	0	1.07403	0.0435653	0.0522783	0.611656	0.326739	0.877114	0	1.07751	1.55993	1.29737	0.467019	1.27704	1.29824	5.05066	0	0.371176	5.75381	0.0929392	1.53263	1.33281	0
EDC3	Edc3	1 hr	0	1.89618	0.0693981	1.26166	0.980611	0.961644	1.99559	0.981392	1.14328	1.22786	1.36732	0.948925	0.405789	1.97416	0.832889	0	0.602603	0.794954	1.23232	0.940222	1.05269	0.823071
EDEM1	Edem1	1 hr	0	0.451626	0.449233	1.19457	1.88331	0.988368	0.746046	0.855731	0.534278	1.02202	1.27638	0.790258	1.26589	0.756184	1.72371	1.38705	0.548569	1.05039	0.584192	0.429098	0.158756	0.345672
EDEM2	Edem2	1 hr	21.8197	0.0190527	0.0806175	0.504054	0.518181	0.960152	0.461801	1.57541	0.352669	0.988148	0.91427	1.10233	0.742666	0.909475	0	3.77217	0.772736	0.1961	0.105114	0.683953	0.0644163	0.470485
EDEM3	Edem3	1 hr	1.18458	0.590461	0.0894053	0.0443215	0.929378	1.26997	0.617146	3.12461	1.13518	1.52736	1.66327	1.59186	1.08918	1.02366	0.226233	6.28592	0.55046	0.487638	0.829197	0.465172	0.479556	0
EDNRB	Ednrb	1 hr	0.0946395	0.507061	0.292153	0.945977	0.442944	0.0585679	0.205629	2.83038	0.0905221	0.9546	0.924227	0.639771	0.442824	0.0940129	0.198021	0.76365	0.284993	0.975724	0.12916	0.0501243	0.117822	0.25644
EEA1	Eea1	1 hr	0.418884	1.10449	0.741707	0.119677	1.14026	1.70708	0.451344	0.298479	1.88437	1.38291	1.58088	0.2778	1.69656	1.01945	0.389065	1.28315	0.619766	1.17785	1.47996	0.486527	0.757156	0.817817
EEF1B2	Eef1b2	1 hr	0.128274	0.621243	0.133135	0.366478	1.05737	1.51828	0.595575	0.495691	3.68899	1.05623	1.2829	0.826228	2.11272	0.884045	1.12306	1.8798	3.63568	3.14857	0.777712	0.995985	0.880253	1.21594
EEF1D	Eef1d	1 hr	0.127698	1.62686	1.56484	1.68157	0	2.11829	0	0	2.9264	2.36492	1.9989	0	0	2.87454	0	0	3.60366	0	1.80313	2.04083	2.93273	0.890054
EEF1E1	Eef1e1	1 hr	0	0.740152	0	0	0.995397	1.26283	0	0	1.52538	0.461148	1.11114	0	0	0.182753	0	0	0.257073	2.1041	0	0	1.67646	0
EEF1G	Eef1g	1 hr	0.201902	0.328744	0.493767	0.399929	0.68305	1.1462	0.414996	1.02935	2.09368	1.01636	0.938888	0.956902	1.42287	1.2488	0.642555	0.401966	1.71747	0.815154	0.434378	0.625067	1.43103	0.517004
EEF2	Eef2	1 hr	0.0242177	0.364535	0.4577	0.201882	0.916355	0.957731	0.434634	0.814335	0.824007	1.2043	0.756512	0.641157	0.814335	1.0405	0.716303	0.380306	1.53327	0.946906	0.32275	0.450283	1.15749	0.330942
EEF2KMT	Eef2kmt	1 hr	0.559881	3.64775	0	1.38484	1.48814	0.632972	1.73617	3.66724	1.42285	0.661234	1.0569	1.15436	1.67574	0.566215	0	0	2.35598	0.233406	0	0.348403	6.87401	0
EFHD1	Efhd1	1 hr	0.113106	0.426466	0.0342095	0.101869	0.734063	1.40662	0.630177	1.18735	0.196613	0.789306	0.6581	0.222781	0.555708	0.463478	0.0849998	0.0519167	0.172593	0.518931	0.954801	0.359173	1.3464	0.678191
EFHD2	Efhd2	1 hr	0.197335	0.526392	1.44666	1.83024	1.03391	1.23484	1.05828	0.878419	0.459482	1.69143	1.42608	0.407552	4.71876	2.0831	0.622763	2.62257	4.6092	3.95159	2.93745	3.47832	0.792135	0.112948
EFNA1	Efna1	1 hr	0	0.262464	0.088896	0.970656	0.74256	1.43482	0.815136	1.06282	0.36336	0.664896	1.73616	0.732768	0.733824	0.69024	0	2.71536	0.693024	0.045984	0.03072	0.2904	0.095808	0.223872
EFNA5	Efna5	1 hr	1.62706	0.022201	0.0157083	0	0.425275	1.92217	0.773894	0	0.0541412	1.15246	1.61523	0.0433548	2.89105	0.61744	0.30118	0	0.17122	1.67555	0.57398	1.50412	1.73074	0.244211
EFR3B	Efr3b	1 hr	0.928677	0.701771	0.927118	1.40935	0.073556	0.472266	0	0	1.89435	0.153263	0.333905	1.29083	0.277416	0.123893	0.699605	1.5465	0.516538	1.1101	0.62449	1.04729	2.59196	0.202041
EFTUD2	Eftud2	1 hr	0.171774	1.2175	0.0368372	0.13438	0.919696	1.05332	0.980958	0	0.830825	0.726201	0.847254	0.269397	1.38987	0.697479	0.826966	0.405567	0.970774	0.745773	0.73193	0.779149	0.65746	0.589116
EGF	Egf	1 hr	0.214672	0.154926	0.166942	0.134842	0.15714	0.441428	0.0985544	0	0.412955	0.0360077	0.276712	0.211365	0.171583	0.0958871	0	0.760216	0.176851	0.0460632	0.293329	0.081284	0.337899	0.0311
EGFL7	Egfl7	1 hr	0.476182	3.80349	2.52181	10.9076	1.66922	1.21989	5.15096	2.01974	0.614152	1.46189	1.77049	3.39645	2.82135	2.98404	3.13351	0.352755	2.92555	1.4986	3.20697	7.07002	2.34293	7.65157
EGLN2	Egln2	1 hr	0	0.214912	0.219298	0.263158	1.74708	1.1462	6.78509	0	1.30263	0.657895	0.328947	4.66959	2.34357	3.43129	3.47368	2.89766	0.247076	6.33918	0.258772	1.04532	0.192982	3.40936
EGR1	Egr1	1 hr	0	0.334711	0.53119	0.967577	0.0159458	0.22986	0.220774	0.18285	0.0587286	0.342699	2.49398	0.0241894	0.263301	0.164166	0.134952	0.0525308	0.39893	1.99653	0.0176005	0.283173	0.633859	0.148055
EGR2	Egr2	1 hr	14.7972	0.0322255	0.235814	0.111462	0.139138	0.340073	0	0	0.137622	0.330216	2.11854	2.56742	1.667	0.0871983	0	1.8759	0.288513	0.0693795	1.20372	1.14685	1.49716	0
EHBP1L1	Ehbp1l1	1 hr	1.74514	1.64488	2.10883	5.44211	1.47461	2.14911	3.42491	1.28843	5.78835	4.75244	1.82606	2.64953	2.93987	7.09901	8.48656	4.08015	4.56123	1.23644	5.00121	4.62806	1.63421	5.71168
EHD1	Ehd1	1 hr	0.0820251	0.847905	2.05698	0.455382	1.1146	1.02117	1.09299	0	0.962948	0.907275	0.673803	2.97129	0.59683	1.08632	0.63365	1.50093	1.00461	2.3066	1.27845	0.673126	1.26767	0.189048
EHD3	Ehd3	1 hr	0.341028	0.0467998	1.92243	0.637527	0.423874	0.347439	1.11254	0.504549	0.181848	1.36149	0.255354	0.5202	1.09013	0.225669	0.42342	1.16298	0.765709	0.046194	0.132574	0.765305	0.788882	1.01182
EHD4	Ehd4	1 hr	0.772517	0.035465	1.09645	0.0295322	0.428217	0.846611	0.487149	0	0.377524	0.942327	1.07133	0.67924	1.725	0.883922	0	0.130654	0.755576	1.09052	0.728087	0.652872	0.621956	0.153726
EHF	Ehf	1 hr	0.0624389	0.536459	0.0517747	0.474298	0.300737	1.78547	0.0521315	0	0.0106245	1.00156	2.24296	0.0164125	0.924888	0.299072	0	0	0.308904	3.08575	0.1958	0.569403	0.853807	0.0448371
EHHADH	Ehhadh	1 hr	0	0.0382492	0.0291513	0.376637	2.76314	0.183187	0.509549	0	0.100172	0.138547	0.232203	0.737628	0.155421	0.237492	0	0.0623951	0.00204626	0.005761	0.0657635	0.358882	0.0866353	0
EHMT1	Ehmt1	1 hr	0.497835	1.36944	1.30668	1.08783	0.690488	1.04724	1.20979	0.824605	0.504343	0.971278	0.787015	0.870125	0.669861	1.60045	0.968594	1.23629	1.64823	0.860732	1.04894	1.63073	0.56242	0.89686
EHMT2	Ehmt2	1 hr	9.91272	15.2525	17.8625	11.5313	0	3.02002	0	0	1.68819	4.12094	1.62477	0	0	5.73262	0	0	8.07419	0	9.95801	14.3534	15.0013	13.8146
EID2B	Eid2b	1 hr	0	0	0	0	1.35284	0.936909	0	0	2.89874	1.41388	0.73817	0.587697	0	0.229968	0	0	0.163249	15.5853	0	1.01498	0	0
EIF1AD	Eif1ad	1 hr	2.16521	0.627406	0.696967	0.573114	1.79026	1.07005	0.695779	0	1.60754	1.13927	1.04172	0.0702396	0.856278	2.05273	1.94516	6.50242	1.1179	3.18063	0.0542915	3.32298	0.888175	0.395649
EIF2A	Eif2a	1 hr	0.114499	0.0923767	1.24743	0.0446437	1.03847	1.14728	0.187045	0	2.07005	1.00369	1.06906	0.0911809	1.41295	0.891281	1.49547	0	0.538216	0.802392	0.881614	0.372596	1.40578	0.232387
EIF2AK2	Eif2ak2	1 hr	1.4914	0.198038	1.10523	0.769765	0.958689	1.08432	0.289476	0.642416	1.14933	1.05445	1.3265	1.23544	1.73442	1.16891	0.903877	0.817185	1.63996	1.03051	0.509313	0.256	0.866285	0.206228
EIF2B1	Eif2b1	1 hr	0	0	0.199624	0.570728	0.977353	1.28479	1.32383	0	1.5987	1.23849	1.18072	0.96521	0.509899	1.25245	1.30113	0	0.274072	2.64085	1.06996	0.598873	0.0384722	1.39533
EIF2B2	Eif2b2	1 hr	0	0.119147	0.0431134	0.0300791	1.09655	1.014	1.86273	0	1.65702	0.802109	1.07917	0	0.359445	0.47291	0	0.331204	0.403561	1.26984	1.93342	0.067678	0.557132	3.13675
EIF2B4	Eif2b4	1 hr	0.753797	9.79978	1.99222	4.20684	1.2041	1.45967	3.16053	3.18763	0.891237	1.34447	1.09575	2.11841	1.30821	2.26955	2.66387	2.79315	1.20269	1.77232	4.83941	5.22599	1.66884	3.69736
EIF3B	Eif3b	1 hr	0.0153833	1.2465	0.858916	2.34954	1.20134	1.26181	1.78487	0.536115	1.01713	1.22329	0.939081	1.46489	1.23369	1.44177	2.38037	0.402628	0.747128	0.539995	1.08439	1.6094	2.06364	1.42377
EIF3D	Eif3d	1 hr	0.114546	0.838716	0.766046	0.451824	0.695623	1.23405	0.707665	1.26199	0.990898	0.831106	0.941894	0.909139	0.910745	1.44221	0.611167	1.76468	1.27985	0.445048	0.876962	1.23405	0.555612	0.897097
EIF3F	Eif3f	1 hr	0.1075	0.143053	0.452269	0.0168408	0.76111	1.26362	0.0679245	0	3.01431	1.18297	1.2653	0.633588	1.40883	1.22741	1.46627	0.990426	2.01079	1.54776	0.297053	1.20926	0.257477	0.105816
EIF3G	Eif3g	1 hr	0.0651553	0.963721	0.410949	0.641233	0.671798	1.40325	1.09828	0	3.66095	1.25638	0.88161	1.44567	0.596889	1.9685	0.532754	0.112392	1.81891	0.456598	1.27884	1.39128	0.296857	2.6454
EIF3H	Eif3h	1 hr	0.0304989	0.122264	0.156072	0.305705	0.796639	1.47804	0.473896	0.393356	2.42529	0.909736	0.929189	0.0409186	1.04331	0.677684	2.72469	0.384993	3.12891	1.89236	0.0719542	0.509806	0.291976	1.35653
EIF3I	Eif3i	1 hr	0.373103	0.508921	0.574926	2.39109	0.881706	0.721057	0.368184	5.18353	2.05187	0.708363	0.832599	0.537242	1.7508	0.762627	0.779684	0.64926	0.757788	1.35326	1.12312	1.08781	0.0268939	0.0897255
EIF3J	Eif3j1	1 hr	0.248589	8.61886	1.66249	3.05241	1.42442	3.53126	2.55418	0.524496	4.4348	2.66074	2.42832	2.59356	2.9892	2.83427	2.13973	1.97122	2.7211	0.732595	7.76486	5.5737	5.51467	3.39438
EIF3K	Eif3k	1 hr	0	0.617667	0.0814327	0.630449	0.714376	1.15883	1.00924	1.22031	2.83655	0.881544	0.712256	1.09978	0.515657	0.804912	1.52665	0.339261	1.11574	0.473819	0.379417	0.617542	0.365512	0.848247
EIF3L	Eif3l	1 hr	0	0.531615	0.134136	1.41078	0.660592	1.08488	0.295537	0.326329	2.10974	0.815267	0.951656	0.133255	1.53258	0.879462	0.233694	0.712346	1.74002	1.10614	0.103672	0.468987	0.334198	0.401462
EIF3M	Eif3m	1 hr	0	0.704207	0.087841	0.0121067	1.26798	1.05228	0.608766	5.16372	1.39436	1.16574	1.33409	0.693042	2.2158	0.742276	0.393267	0.383514	1.29744	1.68855	0.251013	0.615559	0.394275	1.34802
EIF4A2	Eif4a2	1 hr	0.163095	0.331886	0.476317	0.25574	1.13637	1.22661	0.945985	0.569101	1.91614	1.18656	1.75815	0.591661	1.13505	0.78528	0.91553	0.106964	1.02971	1.04817	0.472819	0.776744	0.438677	0.95085
EIF4A3	Eif4a3	1 hr	0.383447	0.00638202	1.42086	0.0135149	0.510637	1.63515	0.875838	1.28789	1.25305	0.884173	1.22024	0.0687006	0.484208	1.01872	0.785664	0.481655	0.542021	0.0359646	0.120808	0.126139	0.595555	0.645335
EIF4B	Eif4b	1 hr	0.195107	1.37033	0.947977	1.23035	1.33829	1.53941	0.983241	1.75932	1.85323	1.69035	1.42078	1.03967	1.52158	1.85323	0.648459	2.4845	1.954	1.26645	1.13819	1.58567	1.74229	0.96993
EIF4E2	Eif4e2	1 hr	0.264429	0.806904	0.288971	0.0451502	2.01151	1.50362	1.16769	0	1.61955	1.02727	1.38847	0.25661	0.938471	1.34518	0.719296	0.506386	1.59833	0.717587	0.981757	0.890059	0.447825	0.120746
EIF4E3	Eif4e3	1 hr	1.52857	1.13556	0.307956	1.99792	0.987313	0.776773	0.935075	0	3.60909	0.971077	1.08138	0.673533	0.407491	1.08323	0.973195	0.70124	0.842865	0.05965	0.974607	0.398931	2.14784	1.08491
EIF4EBP1	Eif4ebp1	1 hr	0	0.0738663	3.35109	0.287009	0.600879	0.65833	0.601874	0	3.88208	0.608589	0.904303	4.8712	2.37989	0.467571	0	7.16777	0.0420317	3.1867	0.290988	1.51588	0.084312	0
EIF4G1	Eif4g1	1 hr	0.0865594	1.00078	0.710802	0.600157	1.15488	1.1659	0.820334	0.244919	1.16955	1.10032	0.959316	0.83569	0.703361	1.0088	0.606764	1.11355	0.622357	0.766717	0.750643	0.814833	0.909104	0.51256
EIF4H	Eif4h	1 hr	1.95466	0.847038	0.673862	0.128598	0.656426	1.05874	0.596962	0	1.65586	1.02337	0.998325	0.188671	1.52033	0.711855	1.00434	5.57743	0.901058	0.181361	0.985648	0.522004	2.90909	0.235001
EIF5	Eif5	1 hr	0.0945765	0.662087	0.536402	0.530109	0.969705	1.01424	0.878216	0.932304	1.37893	0.915549	1.29521	0.965864	1.65302	0.846096	1.08757	0.350371	0.432137	1.40573	0.66706	0.769354	0.940346	0.384257
EIF5AL1	Eif5a	1 hr	10.7918	0	0	0.336813	0.420443	0	0	0	0.686227	0.231415	0.0939409	0	0.376909	0	0	0	0.0744654	0.209649	0.929099	4.28348	6.71563	0
EIF6	Eif6	1 hr	0	0.274568	0.91674	0.0988616	1.06109	0.759109	1.08319	0.856172	0.503217	0.482571	0.494736	1.75475	1.3061	0.575864	0.704796	0.488482	0.0651938	0.821905	1.16638	0.196267	0.0609104	3.00705
ELAC1	Elac1	1 hr	0.305358	0.240884	0	0	0.75847	1.15606	2.34212	0	1.64947	0.550271	0.816676	0	0.491617	0.169693	2.33406	1.12248	0.05149	0.142381	0.523855	1.02577	0.608925	0
ELAVL1	Elavl1	1 hr	0.759292	0.451403	0.413435	1.95282	0.59984	0.664632	0.755793	0.487621	0.944207	0.865486	0.824084	0.206944	1.26441	0.477579	1.31332	1.34319	0.46773	0.589344	0.241802	0.7832	0.663142	0.718344
ELF1	Elf1	1 hr	0.710228	0.330295	0.998343	0.0384742	0.67321	1.13106	0.180943	0.33206	0.651458	1.14417	1.25866	0.180061	0.952721	0.63981	0.300072	0.700609	0.614793	1.13353	0.465043	0.164971	0.121423	0.160162
ELF3	Elf3	1 hr	0.022191	1.22981	0.407312	1.33979	0.967422	2.10391	1.86186	1.00185	0.0246639	0.807107	1.63208	0.957075	1.2793	1.43223	0.105586	0.664785	0.310804	1.26654	0.923268	1.01818	1.31015	0.400056
ELK4	Elk4	1 hr	0.830694	0.0169132	0.39353	0.734811	1.2804	0.983321	0.65977	0.236596	1.18678	1.16044	1.48267	0.706297	1.72649	1.03422	0.50466	0.651722	1.50889	1.22369	0.741098	0.476555	0.853863	0.465552
ELMO1	Elmo1	1 hr	0.250365	1.82938	0.21869	0.295775	0.122281	0.171098	0.128829	0	0.488699	0.572225	0.787562	0.938963	0.45021	0.806727	0.172748	0.789585	2.23237	0.253613	0.262929	0.0601026	1.23426	0.328621
ELMO3	Elmo3	1 hr	0.112746	0.0350471	1.61878	0.46983	1.57249	1.03025	2.09026	6.99554	0.263349	0.721607	0.457762	1.85568	0.742767	0.926269	0.823277	0.728715	0.0279385	1.58605	1.74244	1.76608	0.454951	1.62705
ELMOD1	Elmod1	1 hr	17.3804	0.195352	0	4.90485	2.27055	0.180881	0.477527	13.3609	1.37009	0.0947161	0.113791	0.272309	0	0.450559	0	4.94365	0.500548	0.601842	1.37404	0	0.0868231	1.53387
ELMOD3	Elmod3	1 hr	0.43656	0.260808	2.43618	0.535241	0.657593	1.39446	1.01708	1.21059	0.984326	1.10571	0.706314	3.09212	0.923218	0.811463	2.20936	1.09374	1.74363	2.87879	1.21761	0.838851	1.19036	0
ELOF1	Elof1	1 hr	0	0.314332	0.137669	0.295682	1.39805	1.42043	1.20816	6.63624	1.54826	0.953169	0.539146	0	2.0457	0.394017	0	0.963002	2.64215	0.0620526	0.708349	0.242446	0.0749378	0
ELOVL1	Elovl1	1 hr	0.698544	0.627652	0.445329	0.984855	1.81304	0.928847	0.142176	1.95718	0.424767	1.12351	0.964293	2.19825	0.805862	0.256348	0.635485	0.620602	0.0826425	2.32437	1.19166	1.93955	2.00437	1.44468
ELOVL2	Elovl2	1 hr	0	0.172493	0.262324	0.0759138	0.309981	0	0	0	0.975914	0.060731	0.0582006	0.385895	0	0	0	0	0.4209	0.077179	0.49344	0.09194	1.66546	3.1112
ELOVL4	Elovl4	1 hr	14.6475	0.0814856	0.143016	0	0.662417	0	0	0	0	0.231707	0.0144124	0	0.182373	0	0	0	0.708426	0	0.449557	0	1.84812	0
EMB	Emb	1 hr	1.655	1.81895	0	0.500754	0.503626	0.293717	0.189545	0	0.493966	1.07043	0.505715	3.16013	4.41541	0.490833	0	0	0.860263	0.484567	0.136285	0	1.7046	0.608842
EMC1	Emc1	1 hr	0.690817	0.748232	0.485326	0.223321	1.11577	0.832554	0.697625	0	0.697048	0.678498	0.618562	0.945439	0.667116	0.351838	0.285562	0.158774	0.323995	0.713581	0.682965	0.0825206	0.912625	0.442859
EMC4	Emc4	1 hr	1.84972	0.0353585	0.0483353	0.462995	0.692289	0.819318	0.288107	0	3.025	0.822295	0.865391	0.108933	0.294297	0.0945276	2.24342	0	0.118814	0.0217866	0.0210723	1.08957	0.211675	0.134648
EMC6	Emc6	1 hr	0	0.434268	0.0343748	0.146207	0.791078	0.702162	1.32572	0	5.4885	0.372852	0.43083	0.368497	0.294935	0.238561	0	0	0.989535	1.52899	0.0405622	0.525017	0.0506455	0.259186
EMC7	Emc7	1 hr	0	0.251619	2.51274	0.377362	1.28	1.67383	0.473097	0	1.68751	1.30789	1.34241	0.121494	0.709447	1.08495	4.83587	0	0.320665	1.39579	3.13017	0.149909	1.14842	0
EMC8	Emc8	1 hr	2.61459	0.390782	3.70233	1.13452	0.897853	0.860283	0.771852	0	1.75814	0.6939	0.529818	0	1.34128	0.334554	0	0	0.107855	1.57897	1.10641	4.23011	0	0
EMC9	Emc9	1 hr	0	2.08127	0	7.97487	1.15373	2.29834	2.20713	0	6.3259	2.18981	0.324686	0	0	3.92359	0	0	0	0.436867	0.476084	0.369376	0.910215	0
EMCN	Emcn	1 hr	0.0903411	0.215566	1.14929	0.0204822	0.381115	0.104743	0.509632	0.506157	0.802508	1.27785	0.961337	0.041833	2.50056	0.439498	0.303438	0.393596	0.851428	0.731507	0.601207	0.961977	0.395425	0.449968
EMG1	Emg1	1 hr	1.25746	0	2.7301	0.189415	1.06624	1.25007	0.761763	0	1.68504	1.26911	1.19706	0.263933	2.23654	0.894222	0.685767	0.975471	0.0379158	1.57474	0.810676	0.866155	1.17818	1.41076
EMILIN2	Emilin2	1 hr	1.10843	2.77347	2.25058	0.803871	0.122838	0.660054	1.61281	0	0.660633	0.894299	0.954923	1.75127	2.14742	0.577005	1.59573	2.73224	1.83302	0.754389	1.59805	3.36248	0.25725	0
EML2	Eml2	1 hr	2.33337	1.20519	1.40739	0.907239	1.01418	1.60327	0.564637	1.97422	0.316201	1.25641	0.775843	2.85068	1.48794	0.972572	1.04095	0.241136	1.23828	0.146847	1.00956	2.55991	1.24522	1.8017
EML3	Eml3	1 hr	0.919297	2.17136	0.41458	4.12307	1.40146	1.96029	3.09854	1.4711	0.324614	2.09048	1.47281	4.73336	1.96304	2.40343	1.46732	2.68688	0.928816	0.860635	3.2319	2.47401	1.34014	3.21775
EML5	Eml5	1 hr	1.93207	1.0277	1.00028	0.0796857	0.288153	0.364731	0.12961	0	0.0745069	0.209986	0.420871	0.775106	0.31025	0.376194	0	1.06209	0.962167	0.590807	0.378473	0.158198	0.495654	0.339044
EMP2	Emp2	1 hr	0.464299	1.51213	1.62941	0.506212	0.636897	0.432278	0.463778	0	1.56589	1.22043	0.911415	1.34122	1.52957	1.3981	2.20291	0.644057	0.939661	0.241586	0.209436	0.298208	1.62055	1.44314
EMP3	Emp3	1 hr	1.46026	1.47545	1.31801	3.43289	0	1.11176	2.93294	0	1.39673	2.20972	0.906445	1.87872	6.01366	2.87171	1.49386	13.0212	6.10481	1.40317	5.5823	16.0343	7.96512	9.82128
EMX1	Emx1	1 hr	0	0.0629253	0.0132381	0.0395379	0.99798	0.379052	0.562268	1.51383	0	0.657495	0.107935	3.19631	0.122497	0.24976	0	0	0.898253	0.802761	0.780786	2.49398	0.63349	0.205809
ENDOG	Endog	1 hr	0	0.0298339	0.0905546	1.55803	0.419429	0.906248	1.25057	0	5.73547	0.462951	0.209188	0.321153	0.487169	0.993292	0	2.40531	1.1565	1.06981	2.72541	2.71032	1.17019	0
ENG	Eng	1 hr	0.0143027	0.0988815	0.551849	0.59979	0.352031	0.294422	0.959623	1.12045	0.365725	1.5359	1.14013	0.803761	1.09072	0.750807	0.184844	0.0982314	0.570744	2.44024	0.697749	0.457225	0.771926	0.44741
ENHO	Enho	1 hr	22.419	0	0.715042	2.13559	0	0.791314	0	0	0	0.157309	0.0810381	1.97352	5.23411	0	0	0	0.805614	1.51589	0	0	1.616	0
ENO1	Eno1	1 hr	0.065424	0.150041	0.347413	0.28113	0.508029	1.08052	0.378643	0.701146	0.128699	0.435537	0.701146	0.142326	0.830342	0.38886	0.250302	0.295678	0.346537	1.06004	0.230723	0.296158	0.579823	0.13781
ENO3	Eno3	1 hr	1.40902	0.0635153	2.93369	7.89208	1.03422	1.58249	12.2078	6.73292	201.282	0.613282	0.878728	2.82014	0.563249	0.392177	0	0.593808	0.019474	1.99893	0.951232	0	0.213016	19.5756
ENPP5	Enpp5	1 hr	0.236972	0.470645	0.590472	0.395573	1.58147	1.5825	0.499106	0	2.15441	0.695861	1.90857	0.488588	2.46748	0.214698	0	0	0.263578	0.09879	0.0365049	0.0835281	0.465076	0.23326
ENPP6	Enpp6	1 hr	0.576887	0.162325	2.69218	0.742285	2.63848	0	0	0	0.128925	0	0.0184369	6.22846	0	0.463995	1.31303	0.379426	0.322645	0.202138	0.0236473	0.499532	0.958985	0
ENTPD2	Entpd2	1 hr	0	0.0870051	2.86111	5.56063	1.24648	0.0674734	3.77081	5.91517	1.14941	0.406616	0.133171	5.03387	0.510193	0.337959	0	0	1.42937	2.30001	0.480008	0	0	0
ENY2	Eny2	1 hr	0	0.123992	3.10532	0	1.46047	1.70731	0.557732	0	3.0295	1.35607	1.21157	0.370592	1.66859	1.06499	2.23462	0.875086	0.870708	0.61074	0.731735	0.050242	0.0304218	1.1316
EP400	Ep400	1 hr	1.00408	1.24726	0.281939	0.713516	1.03825	0.986603	0.897335	0.624969	0.522701	1.06769	1.00971	1.15575	0.966286	1.36504	0.945237	0.0967255	0.77183	1.18057	1.11119	0.888329	0.410965	0.504039
EPB41L3	Epb41l3	1 hr	0.369852	0.858967	0.483094	0.406937	1.50885	0.499982	0.759239	0	0.18436	0.335222	0.408517	1.29353	0.770961	0.682848	0.0763702	0.213802	0.795279	0.387914	0.671575	0.367012	0.699864	0.725506
EPB41L4B	Epb41l4b	1 hr	0.440124	0.0352478	3.86847	0.165294	0.224586	0.576634	0.208557	0	0.238978	0.329985	0.269314	0.967376	0.387209	0.11281	1.03675	0.468908	0.567843	2.56826	0.621189	0.260696	0.237169	0
EPB41L5	Epb41l5	1 hr	0.14148	0.497538	0.152833	0.61533	1.1817	1.31056	0.627569	0.883057	0.54295	1.48878	1.039	0.268852	0.580625	0.840184	0.0931941	0.397279	0.274529	1.31162	0.540148	0.040238	0.298192	0.388081
EPC1	Epc1	1 hr	4.86546	0.0509933	1.03603	2.82108	1.45213	1.84356	2.78075	3.82107	1.95842	1.43239	1.92216	0.865671	1.31674	1.6511	0.738009	4.77406	0.471241	0.848864	1.2792	0.815321	0.328202	1.76546
EPC2	Epc2	1 hr	0.085863	0.479383	0.0192799	0.111719	1.00226	1.21426	0.596782	1.77615	1.52498	1.03036	1.75462	0.635566	1.52439	0.894351	0.771123	0	0.361312	0.997551	1.01743	0.740111	0.823433	3.5712
EPCAM	Epcam	1 hr	0	0.011188	0.211426	0.0530056	0.858226	1.5597	0.320215	0.330242	0.00811246	0.587424	0.918889	0.119773	1.08032	0.168542	0	0.131651	0.0119412	2.93919	0.687268	0.143608	0.297352	0.017747
EPDR1	Epdr1	1 hr	0	0.0148653	0.108779	0.0514166	1.73207	0.903113	2.04005	7.10563	6.52798	1.1985	1.10563	0.713711	0.280343	0.410458	0	1.54774	1.15233	0.911857	0.0912907	0.070829	0.481287	0.197796
EPHA2	Epha2	1 hr	0.601027	1.41571	0.88827	3.41138	0.780057	1.01891	2.28078	2.658	0.189746	1.33531	1.08795	2.56994	0.74103	1.52158	0.964126	0.291998	0.42306	2.7621	1.93783	2.68454	1.05722	3.70082
EPHX1	Ephx1	1 hr	0	0.100026	0.390068	0.124573	1.31612	0.312966	0.946173	0.532787	0.853599	0.322828	0.218988	1.0771	0.317349	0.195932	0.458666	0.956255	0.72381	0.848251	0.139169	0.566538	0.0779346	0
EPM2AIP1	Epm2aip1	1 hr	0	0.409922	1.4717	0.149161	1.23886	1.24353	1.30193	0	1.78006	1.25947	1.59077	0.248395	1.78986	0.671226	0.528909	0	0.0776137	0.405489	0.204222	0.055605	0.105766	1.45981
EPN1	Epn1	1 hr	0.0654902	0.767543	0.32047	0.389783	0.806854	1.16918	0.757376	0.208494	1.22697	0.95199	0.833698	1.46962	1.22949	0.9918	0.452448	0.67784	0.553509	0.503338	1.2252	1.57919	0.500651	0.171011
EPN2	Epn2	1 hr	0	0.0420513	0.10208	0.116853	1.03589	1.12765	1.43639	0	1.21198	1.66619	1.39199	1.16454	0.870025	1.86362	2.07443	0.604664	1.56168	0.668757	1.18447	1.07176	0.0388467	1.46718
EPN3	Epn3	1 hr	0.847801	0.0227185	0.108514	2.70243	0.785258	1.31206	2.83233	0	0	1.78968	0.783922	2.27319	0.718439	0.422297	2.32825	7.21379	0.765212	3.70418	3.3586	3.23084	3.14504	4.68215
EPS8	Eps8	1 hr	0.105006	0.0245934	0.0603295	0.103176	0.936805	0.397421	0.77988	0.405778	0.432919	1.15945	0.746505	0.179662	0.510705	0.330114	0.482477	0.0525827	0.703552	0.849999	0.0842331	0.223569	0.210437	0.531717
EPS8L2	Eps8l2	1 hr	0.0932723	1.50678	0.806696	1.29974	1.47741	1.34744	2.08154	0.732713	0.0144424	0.520795	0.620548	1.14185	0.659188	1.14437	0.178087	0.76504	0.643051	1.19797	1.76926	1.12254	0.378432	0.587167
EPSTI1	Epsti1	1 hr	0	0.862193	0.0319285	0.687576	1.1842	0.405046	0.507515	0	0.595627	0.709976	1.44681	0.113235	2.08117	0.933599	0	0.875064	2.56925	0.881746	1.02691	0.139718	0.412595	0.763933
ERAP1	Erap1	1 hr	0.568165	0.466125	2.69244	0.755417	0.445824	0.669137	0.306832	0	0.664818	0.756307	1.14194	1.09399	0.996003	0.584059	0.3924	0	0.889511	0.834618	0.419735	0	0.233063	0.605651
ERBB2	Erbb2	1 hr	0.399052	0.485111	0.453216	0.494955	1.15297	1.33304	0.878477	0.915788	0.228334	0.784589	0.956552	0.53156	0.841435	0.669151	0.424966	0.170102	0.440535	0.64379	0.884304	0.53957	0.951393	0.598764
ERC2	Erc2	1 hr	0	1.07648	0.401577	0.0175959	0.876666	0.801492	0.128548	2.12343	0.0261983	0.428362	0.56776	0.746163	0.665418	0.229431	0	0	0.124931	0.181433	1.89469	0.823781	1.07716	0.227964
ERCC2	Ercc2	1 hr	1.61947	2.92929	10.5194	0.534757	1.5992	1.76938	2.23274	1.58211	1.0616	0.693696	0.693696	1.77698	0.425526	1.52179	1.79535	2.47448	1.04308	2.11322	1.91962	2.27375	1.13632	4.98964
ERCC3	Ercc3	1 hr	2.27578	2.32264	3.19223	2.34846	1.36444	1.45951	2.29187	2.10149	1.36989	1.58039	1.13944	2.94677	1.36822	2.21383	0.473649	0.318309	1.21883	1.29512	1.89057	2.369	1.58861	1.78846
ERGIC3	Ergic3	1 hr	0.0307675	0.671427	0.326939	0.336413	1.18306	1.5428	1.15523	0.73206	0.766527	1.05927	0.957944	1.01357	1.56928	0.825896	0.858604	0.459934	1.03707	1.75605	1.25592	0.883597	0.357842	0.163763
ERH	Erh	1 hr	0	0.0144925	0.025575	0	0.278597	1.15207	0.320028	3.06337	1.78871	0.723771	0.89052	0	0.823855	0.73349	4.17452	0	0.411757	4.69573	0.0301785	0.0690524	0.303149	0
ERI3	Eri3	1 hr	0.0806507	0.688369	0.338567	0.0347673	1.4348	1.10167	1.85437	0.889996	1.8921	0.836899	1.50067	2.20287	0.738746	0.508738	0.558169	0	0.446772	1.69899	1.99723	0.624038	0.11802	1.9161
ERICH4	Erich4	1 hr	1.513	3.09633	0.0986239	1.48662	0.405199	0.0634557	0	0	0	0.0474006	0.143349	0.614679	0	0.546636	0	10.5952	3.43846	2.36162	1.888	0.273318	3.30619	0
ERLEC1	Erlec1	1 hr	0	0.547467	0.0202736	0	0.888582	1.53718	0.322256	0	1.37931	1.04559	1.15984	0	1.29123	0.515878	0	1.64727	0.0051077	2.91131	0.340173	0.478945	0.0266386	1.37656
ERP29	Erp29	1 hr	1.2691	0.261407	0.154135	0.328082	1.47806	1.6989	0.339601	0.891794	0.663705	1.29304	1.01028	1.63024	1.59141	0.839865	1.60728	0.142466	0.430063	1.88201	0.471486	0.644982	1.0893	0.1362
ERRFI1	Errfi1	1 hr	0.0600627	0.0472277	0.0118261	0.0111364	0.828464	0.142743	0.560155	0.127635	0.0989252	0.207518	0.21504	0.299241	0.274924	0.0590154	0.560487	0.465866	0.0617485	0.204338	0.0552863	0.183432	0.2308	0.109768
ERVW-1	Gm14226	1 hr	0	3.89508	4.48839	1.07149	0	0.199629	0	0	0	0.0965645	0.191272	0	0	0	0	0	2.24234	0.444754	0	0.663881	0.314763	0
ESAM	Esam	1 hr	3.94164	1.39022	0.46716	1.36054	0.767153	1.114	1.7274	0	0.97344	1.16221	1.45197	1.2765	1.29049	1.41501	0.36902	1.0369	0.6142	1.24853	1.07215	0.128389	1.96758	3.44957
ESCO2	Esco2	1 hr	0	0	28.5098	0	2.61861	3.1789	0	0	0	2.36501	3.83945	0	0	0	0	0	1.8578	5.39646	3.07864	0	4.19332	0
ESD	Esd	1 hr	0.0908754	0.304073	0.0343781	0.0850125	0.790163	0.585227	0.474764	0	1.67893	0.731401	0.626801	0.214264	0.484625	0.33512	0.593089	0	0.101402	3.49751	0.0426395	0	0.300475	0.310735
ESM1	Esm1	1 hr	0	0.18995	0.127453	0	0.118642	0	0.148764	0	0	0.39322	0.0729475	0	1.37453	0.186672	0	0	0	0.065161	0.88705	0.766154	0	0
ESRRA	Esrra	1 hr	0.245876	0.516015	0.674969	1.46195	1.95494	1.63359	1.80612	0.983296	1.66378	0.831786	0.544345	1.80929	0.513878	1.02272	1.03444	0.897753	0.576536	0.459905	1.82397	1.50283	1.42169	0.250218
ESYT1	Esyt1	1 hr	0.851054	1.4259	0.980908	1.47917	0.717845	1.007	0.68135	1.28238	0.745096	1.10227	0.972281	1.3121	1.2236	0.729142	1.22446	1.17708	0.411645	0.474466	0.302879	0.746397	0.482957	0.50699
ETF1	Etf1	1 hr	0.0541706	1.0877	0.0615725	1.32074	0.619355	1.0564	0.641702	0	1.2001	0.944237	1.21712	1.10467	1.63308	0.586636	0.632744	0.664568	1.38779	2.05971	1.0126	0.397298	0.186179	0.884975
ETFB	Etfb	1 hr	0.0895883	0.024392	0.186249	0.0395349	1.46016	0.648337	0.550497	1.13654	1.57977	0.498086	0.359169	0.385602	0.278286	0.6307	1.4758	0.462223	0.244872	0.021717	1.02247	0.0511869	0.0100197	0
ETFDH	Etfdh	1 hr	0	0.03401	0.189092	0.0149677	0.969076	0.724936	0.341014	0	3.59275	0.457846	0.649349	0.265594	0.4018	0.209132	0	0	0.359059	0.0760859	0.410697	0.0181276	0.0829876	0.921928
ETHE1	Ethe1	1 hr	0	0.209302	0.508083	0.339241	1.36669	1.21146	1.38614	0	1.20057	1.02667	2.38869	0.35597	0.335351	0.61468	0	0	1.11382	2.20779	1.45189	0.15756	12.7527	2.86993
ETNK1	Etnk1	1 hr	0	0.0783259	0.11649	0.0446698	1.05901	1.03868	0.857589	0	0.59582	1.20434	1.77558	0.0823728	1.54311	0.53486	0.214026	0.690231	0.065468	1.22637	0.643717	0.231597	0.268173	0.185954
ETS1	Ets1	1 hr	0.0407144	0.316021	1.48981	0.917664	0.545986	0.445506	0.191035	0.755478	0.549295	1.1345	0.842491	0.481541	1.87139	0.748731	0.706724	1.04751	1.63333	0.469676	0.719649	1.02228	1.11216	0.222184
ETV1	Etv1	1 hr	0.0870052	0.317656	0.422607	0.145236	0.173935	0.270481	0.0995751	0	0.0730722	0.348172	0.651668	0.986513	0.418518	0.0174162	0.700282	2.76221	1.00416	1.3758	0.158184	0	1.99029	0.274873
ETV6	Etv6	1 hr	0.452796	1.86562	1.03474	2.43256	0.78109	1.08567	0.796233	0	0.47194	1.23989	1.69675	0.169218	2.15169	2.41477	1.58518	2.45592	1.99605	0.476583	0.631944	1.39903	0.84052	0.703017
EVA1B	Eva1b	1 hr	3.3524	1.02534	0.347279	1.26686	1.34224	0.690808	2.77148	0	0.548296	1.74915	1.59126	0.60305	1.43599	0.17589	3.6363	1.30961	2.23594	3.20877	2.28207	1.97904	1.03209	4.61101
EVC	Evc	1 hr	0.556375	0.322449	0.354688	0.603017	0.95576	1.07323	1.03709	0.415546	0.0568612	1.3273	2.34175	0.376148	0.71345	0.855834	0.615145	0.0547188	0.247105	0.757613	0.761544	0.636683	0.399445	0.347624
EVI2A	Evi2a	1 hr	0	0.88279	0.502683	1.07965	0.984317	1.81758	0.898886	0	0.938506	1.02146	0.59059	0.512588	14.9926	0.706975	0	31.305	0.0804787	0	9.61411	0.501444	0.419728	0
EVL	Evl	1 hr	0.240022	0.666572	0.598811	0.0586766	1.09958	1.75451	2.39289	1.75801	1.0839	1.93976	1.74388	1.00255	1.6996	5.39603	3.7841	0.255499	1.397	0.575731	2.91903	2.20387	2.3398	2.04117
EWSR1	Ewsr1	1 hr	0.862342	1.11289	0.508203	0.887725	1.14117	1.34358	1.67052	0.568094	0.686846	1.5869	1.39494	0.698915	1.58275	2.10172	1.14967	0.611852	1.20282	0.808361	1.45211	1.23217	1.33329	1.04725
EXOC7	Exoc7	1 hr	0.885433	0.994423	1.01441	0.544045	1.28347	1.28764	0.965737	0.30032	0.608858	1.02518	1.16712	0.749385	0.668304	1.12658	0.692141	0.228548	1.23456	0.965737	0.8479	0.512767	1.07206	0.435554
EXOC8	Exoc8	1 hr	0	0.077385	0.605731	1.16729	1.54716	1.05691	0.567744	0	1.48573	1.04291	0.811729	1.3137	1.09131	1.06016	1.18194	0.767447	0.8457	0.517058	0.960204	0.122535	0.192974	0.253102
EXOSC1	Exosc1	1 hr	4.51147	0.0374853	4.71918	1.03415	0.497011	0.669884	0.827764	0	1.49765	0.791601	0.980792	0.709134	0.187426	0.302087	1.57747	0	0.0745296	1.71374	0.0780576	0.315318	0.0582125	0.498775
EXOSC4	Exosc4	1 hr	4.50335	0.118362	0.516998	0.356203	1.47618	0.819603	1.04795	0	1.42593	0.95304	0.874318	0.231141	0.523697	0.4433	0	0	0.0943548	1.03623	0.653226	2.52413	1.86141	0
EXOSC5	Exosc5	1 hr	5.86416	1.13232	1.05106	0	0	0.907648	0.785752	14.5588	2.26165	0.543155	0.730779	0.960829	0.34836	0.137432	0	0	0.068716	0.109348	1.24824	0.674612	0	0
EXOSC8	Exosc8	1 hr	0	0.220311	0.379197	1.1638	1.32064	1.57944	0	0	3.69042	1.51843	1.13391	0.169533	2.18796	1.15889	0	0	0.0470925	0.0749386	0	0.165848	1.36527	0
EXPH5	Exph5	1 hr	0.222041	0.744994	0.910991	1.33865	0.48849	0.755301	0.426648	0	0.0358728	0.984025	0.810862	0.0647401	0.44384	0.179968	0	0.426206	0.384575	1.99454	0.24499	0.61032	0.288995	0.0455355
EZH1	Ezh1	1 hr	0.120252	0.934036	0.454241	2.03525	1.21833	1.10644	1.0668	0.985245	1.08136	1.24139	0.971996	0.534308	1.00783	1.32048	0.434283	2.12597	0.750405	0.928474	0.724075	0.889772	1.10509	1.37978
EZH2	Ezh2	1 hr	0	0.170139	1.52873	0.741593	1.60652	1.12963	0.229593	0	1.05215	1.41045	1.97431	0.749183	1.246	1.60083	1.23051	2.23616	0.905408	0.58695	0.370006	2.18272	0.315612	0
EZR	Ezr	1 hr	0.0531171	0.929183	0.462063	0.647441	1.48104	0.951211	0.624724	0.497758	0.107232	1.26508	0.577769	0.914548	0.528093	0.781176	0.0978022	0.391126	0.4727	0.69666	0.870576	0.638225	0.911315	0.562664
F10	F10	1 hr	0	6.9903	0.929097	0	0.580936	0.374247	0	0	4.11171	1.32341	1.17291	0	0.501672	0.301003	5.23043	1.98863	15.2177	0.91806	0.177592	1.68562	1.36455	3.64214
F11R	F11r	1 hr	0.219639	0.730912	1.7449	2.16573	1.43189	1.25737	1.22141	1.52887	0.170783	1.00057	1.15802	0.175513	1.47791	0.669626	0.191426	0.767683	0.681367	0.733621	0.899329	0.90492	3.34757	1.88132
F2R	F2r	1 hr	0	0.114953	0.0141917	0.109182	0.235015	0.163867	0.3371	1.04744	0.265858	1.77822	0.606459	0.80467	1.7277	0.37731	0	0.359239	0.039926	0.631247	0.0767298	0	1.4784	0
F2RL1	F2rl1	1 hr	0.484727	0.0224637	3.84145	1.43569	1.67102	1.45357	0.369811	2.1799	0.0409542	0.643807	1.00017	0.757348	2.52296	0.553799	0	3.78613	0.0858817	0.139825	1.52432	0.462263	0	0.172833
F8	F8	1 hr	0	0.403411	0.726096	0.368383	0.75013	0.20149	0.311746	0	1.42471	0.743017	0.363802	0.751747	0.867608	0.422218	0	0.879355	0.853758	0.142805	0.788715	0	0.0732886	0.463173
FAAH	Faah	1 hr	0.559741	0.135597	0.170121	0.750361	2.07348	0.612031	2.3376	0	0.373517	0.419627	0.327763	1.335	0.472987	0.493962	0.568178	0.261925	0.90123	0.0188957	0.0695219	0.543816	0.739785	0.879957
FABP1	Fabp1	1 hr	0.190915	0.299866	0.234224	0.592332	1.83782	0.00694883	0.342497	0.768185	0	0	0.00727204	0.0295729	0	0	0	0.51945	0.122106	0.0489004	0	0.170553	0.0160631	0.199512
FABP3	Fabp3	1 hr	0.413806	0.0186534	0.425333	0.0158378	0.288336	0.929326	0.932406	0	15.2056	0.0891316	0.231496	0.141484	0.236511	0.178703	0.766461	0.823301	0.0669587	0.0594797	0.32837	0.147819	1.24124	0.865975
FABP5	Fabp5	1 hr	0	0.212751	0.445559	3.1798	0	0.267192	0	0	7.62607	0.576648	0.565186	0.296562	0.4649	0	0	0	0.915473	0	1.88109	0.512178	0	0
FAH	Fah	1 hr	1.22952	0.422117	1.16402	4.34755	1.56571	0.313343	1.9032	0	0.728919	0.410143	0.180419	0.321393	0.0943852	0.593278	0	0	1.33437	0.479372	0.0525257	0.530992	0.0222379	0.365265
FAHD1	Fahd1	1 hr	0.189061	0.0237526	0.0206336	1.69619	1.44715	0.564944	0.509521	2.42988	1.14956	0.424668	0.294148	1.19155	0.0878127	0.344053	0	0.200498	0.0337495	0.0731772	0.298467	0.487448	0.634363	0.186502
FAIM	Faim	1 hr	0	0	1.88074	0.42699	0.590455	1.23184	0.535315	1.13073	0.611489	0.790578	1.39035	2.09589	0.295678	0.964109	0	1.82064	0.726424	1.85655	0.650401	0	0.267132	0
FAM107B	Fam107b	1 hr	0.0795791	0.478077	0.761501	0.655819	1.20134	1.00144	1.05992	0.76574	0.111571	0.771585	0.675184	0.83026	0.576441	0.620882	0.762393	0.439548	0.688681	0.868409	0.861739	0.51848	0.626549	0.603012
FAM110D	Grrp1	1 hr	9.82979	3.17292	0	0.740426	0.595358	0.844874	0.842553	0	2.02631	0.719536	0.57795	1.86615	2.18182	2.35706	0	0	0.133462	0	0.605803	0.470019	1.57834	0
FAM124A	Fam124a	1 hr	1.62708	0.415371	2.10561	0.915381	1.53334	0.523673	0.341652	1.81911	0.655638	0.207685	0.39098	0.431206	1.15146	0.211508	0	0	0.785964	0.0578825	0.380241	0	1.57429	0
FAM133B	Fam133b	1 hr	0.439491	5.14503	0.884108	1.56676	2.07442	2.22184	3.0533	1.04275	1.39288	1.64199	2.25772	3.53228	1.46977	3.27221	3.20875	2.40376	0.138276	1.7121	5.16817	3.12313	0.018289	0.855289
FAM136A	Fam136a	1 hr	0	1.05003	0.0872452	0.062839	1.80592	1.25706	3.09103	1.23378	1.88405	1.04498	1.18721	0.572424	1.07219	0.487142	0.662053	0.351646	0.0441837	1.34571	1.08916	1.81293	0.822237	0
FAM13A	Fam13a	1 hr	0.599564	0.347296	0.472521	0.0807374	0.861748	0.968422	0.596212	0.213803	0.447067	0.750897	0.880015	0.241616	0.463657	0.828851	0.2792	0.757204	0.836237	0.12318	1.18569	0.8028	0.491526	0.103123
FAM160A2	Fam160a2	1 hr	0	1.24968	0.0358211	1.87125	1.05372	1.01031	2.59359	0	0.621751	0.982874	0.855912	5.2657	0.833502	2.00598	0.935142	0	1.39782	0.802533	0.587254	0.873822	0.633309	0.868352
FAM160B2	Fam160b2	1 hr	0.838129	0.376976	0.456362	0.953203	0.628579	1.74184	1.65201	1.09388	0.875176	1.38403	1.43338	1.9584	0.960069	1.70522	1.77746	0	0.386273	1.49596	1.78697	1.8876	3.54562	0.703888
FAM162A	Fam162a	1 hr	0	0.0112478	0.0823078	0	0.705306	1.28239	0.174011	0	2.78748	0.432447	0.606325	0	0.667858	0.137753	0	1.42742	0.0152177	2.93106	0.069075	0.0535927	0.949848	0
FAM189B	Fam189b	1 hr	0.308117	4.97505	0.11656	3.0884	0	1.32825	0	0	2.58737	1.60655	1.25099	0	0	3.69153	0	0	1.29346	0	4.25942	5.46117	2.36509	1.05356
FAM193B	Fam193b	1 hr	0.0532376	1.60497	0.806339	2.18967	0.894426	1.09125	3.21214	1.43035	0.716731	1.19993	1.13209	1.12387	0.859103	1.92419	0.649736	0.216838	1.08422	0.63368	1.26084	1.70479	0.918087	1.69157
FAM20B	Fam20b	1 hr	0.422303	3.92437	1.90879	7.65595	1.00516	1.12607	0.602976	4.09545	1.701	1.48289	1.00096	1.05586	1.13367	1.00956	1.75756	0.395921	1.24066	1.17224	1.72485	1.92178	2.24762	2.09979
FAM214A	Fam214a	1 hr	0.703638	0.0426037	1.50894	1.69446	1.76165	1.43894	0.942802	0	2.91632	1.46727	2.15456	0.0953114	1.26134	1.47957	2.12945	1.88571	0.298226	0.543119	0.0844782	0.470932	0.982801	0.378121
FAM214B	Fam214b	1 hr	2.59796	0.0946102	0.214203	0.266944	1.8043	1.20749	3.39486	3.07194	1.12445	1.7592	1.00231	2.59658	0.795512	2.58432	0.827435	0	0.37821	0.517927	0.483229	0.529956	0.411288	0.53944
FAM216A	Fam216a	1 hr	26.9803	0.500585	0.436696	3.53077	0.360168	0.261877	0	0	1.97285	1.01802	1.07419	1.66323	0.835479	0.81582	0	0	0.534285	17.6258	0.821437	0.284344	0.954833	5.17927
FAM221B	Fam221b	1 hr	5.72328	0.989053	0.925005	0.475066	0	0	0	0	0.0253167	0.0267337	0.18024	0.301722	0.112414	0.0983385	0	1.25195	2.03025	1.51145	1.28615	0.729462	1.24779	0.81193
FAM228B	Fam228b	1 hr	0.424999	0.192396	0.0696189	0.403412	1.27014	1.25152	0.506491	0	2.19003	1.80685	1.55833	0.433904	0.607951	0.850268	0.776062	0	0.205349	0.246904	1.33274	2.6725	0.035619	1.99062
FAM43A	Fam43a	1 hr	0.557402	0.909626	1.39061	3.53818	0.716168	2.03677	0.904	0	1.34076	1.28185	2.75576	1.75409	2.08459	1.48015	1.87988	0.443796	1.69236	0.0748515	3.52412	4.60501	1.02026	1.92129
FAM53A	Fam53a	1 hr	17.5936	0	27.5761	0.269697	1.93191	1.34665	6.32229	0	0.245846	0.877892	0.698094	8.6349	5.36551	0.210988	0	0	0.515544	6.12048	0.293548	3.42993	16.5781	4.50413
FAM53B	Fam53b	1 hr	0	0.215192	0.152682	0.157449	1.09281	1.00351	1.47962	0	1.09315	1.11014	0.710235	0.571048	0.981692	1.36588	0.50122	2.91493	1.01835	0.350082	0.843714	1.31506	0.48195	0.577091
FAM53C	Fam53c	1 hr	0.605047	4.07124	0.109707	0.177119	1.25014	0.800529	0.286707	0	2.65441	1.27798	0.903246	2.08965	0.749467	1.57298	1.20133	0.916515	0.639878	0	0.720915	1.26566	0.620212	0.581708
FAM71E1	Fam71e1	1 hr	0	0.239638	5.4642	22.3101	0.579879	0.421628	0.820648	0	2.45177	0.453278	0.423888	3.6104	0.885079	0	0	0	0.261115	1.36436	2.96835	0.4578	0	0
FAM83H	Fam83h	1 hr	0.945381	0.919642	0.377915	2.05286	0	3.12826	0	0	0.0353759	2.20149	2.26683	0	0	2.07503	0	0	0.0741838	0	3.4176	1.41015	4.32695	1.46348
FAM98C	Fam98c	1 hr	20.4518	0.351944	3.14973	3.68085	1.19256	1.76318	3.14479	8.4669	0.631328	1.43641	1.8155	1.57659	0.162398	1.6378	1.76564	0	0.0567652	0.236439	1.29622	2.60478	6.5201	8.64707
FANCE	Fance	1 hr	1.26255	0.992752	5.74926	1.49154	0.386846	0.226846	0	0	1.60188	0.467114	0.504698	1.33047	0.692349	1.28161	2.00403	2.37584	1.29799	0.498255	0.852349	1.00376	0.477315	1.9804
FANCF	Fancf	1 hr	0.868727	0	0	0	1.05541	1.65771	0.889306	0	0.447226	0.874607	1.2792	0.336246	0.287738	0.139276	1.19248	0	0.279654	0.0672492	0.117594	1.11163	1.45119	0
FANCG	Fancg	1 hr	2.15723	9.52841	2.55996	2.30676	1.13939	1.79991	2.12879	35.7032	0.70501	0.895826	1.2481	0	2.81545	1.07655	3.20442	0	3.8365	0.219714	0.53667	3.54202	1.52928	7.43219
FAR1	Far1	1 hr	0.234955	0.324974	0.824671	0.286854	0.713033	0.687215	0.152252	0	0.762308	0.766638	0.931684	0.250406	1.41206	0.388125	0.385861	1.21595	0.497565	0.405381	0.327238	0.199951	0.171738	0.485821
FARP1	Farp1	1 hr	0.171017	0.420846	0.143434	0.822851	1.49368	1.04216	1.17362	0.513473	0.149001	0.683364	1.30513	0.670852	0.620467	1.04216	0.599423	0.5219	0.388927	0.320634	0.4289	0.604544	0.556671	0.152104
FARSB	Farsb	1 hr	0	0.735608	0.0633418	0.0458682	1.72692	1.17947	0.816111	0	3.02387	1.45561	1.76546	1.05653	1.31941	0.789745	2.18202	0	1.49025	0.676478	0.0814395	0.583338	0.21218	0
FASTK	Fastk	1 hr	1.03622	2.20215	1.82248	0.456905	1.94516	1.95869	2.69193	1.35178	2.5284	1.55697	1.17107	3.44829	1.66531	2.33525	2.66325	0.428636	1.29199	0.705241	0.900284	3.40758	0.0672237	1.33122
FASTKD2	Fastkd2	1 hr	1.16922	0.0231705	0.497816	0.392339	1.66375	1.21704	0.537681	1.90084	2.17756	0.929318	1.68404	0.386644	1.29654	0.56093	0.25316	0.603526	0.377204	0.303167	0.562334	0.713996	1.80878	0.383055
FASTKD3	Fastkd3	1 hr	2.87387	0.0681575	2.05148	0.0578695	0.867722	0.830106	0	0	0.950668	0.99182	0.681896	0	2.07334	0.183575	0	0	1.05933	0	0.844252	0.362971	0.228585	0
FAT2	Fat2	1 hr	1.71544	1.85927	1.11881	0.484165	0	0.0425787	0	0	0.0503799	0.0219613	0.0907624	0.337745	0.137864	0.0153729	0.269665	1.94711	1.43384	1.0943	0.496719	0.865111	0.861538	0.734458
FAU	Fau	1 hr	0.0579088	0.870494	0.118414	0.326484	1.14397	1.23546	0.707473	3.23146	1.8133	1.60455	1.73545	1.06433	1.8719	2.09275	3.21468	1.24627	2.33027	0.257503	1.84279	1.41475	2.74802	0.832403
FBL	Fbl	1 hr	0.0888291	3.29762	1.27539	2.5707	1.48313	2.77962	1.64685	2.11353	2.56836	2.8648	1.53575	1.22602	2.73208	3.6248	3.93805	0.369904	2.42561	0.0880476	7.06373	7.01645	8.01754	8.98645
FBLN5	Fbln5	1 hr	0.38697	0.174855	0.408514	0.335722	0.676431	0.222347	0.565625	3.28147	0.237264	2.60692	0.92138	0.380753	0.385653	0.532877	1.06895	0.617391	2.24203	1.50363	0.623457	0.344055	0.546952	0.105993
FBN1	Fbn1	1 hr	1.63365	1.43275	1.30348	0.681363	0.391223	0.704469	0.548515	0	1.26047	2.89155	1.40694	1.38766	2.28091	1.16309	2.24981	0.161062	0.969362	2.44397	1.00519	0.796601	0.87076	1.16233
FBP1	Fbp1	1 hr	0	0.0347988	0.272387	0.00878511	1.6555	0.162085	0.200154	0	0	0.0526618	0.0960993	0.199178	0.115085	0.194639	0	0.445014	0.0274291	0.0738437	0	0.0551021	0.00644241	0
FBP2	Fbp2	1 hr	4.48029	24.2934	53.2182	1.93139	0	1.09051	0	0	439.463	0.216788	0.262774	0	0	3.08102	0	0	6.5562	1.20219	13.7234	24.5628	52.108	7.42993
FBRS	Fbrs	1 hr	3.04968	3.32431	1.46757	4.70185	0.803677	1.1192	2.06324	0.966123	0.681736	1.22877	1.17952	1.24373	1.25891	2.68447	1.60454	2.55583	3.95603	1.10425	2.7688	3.31819	3.30431	2.60566
FBXL19	Fbxl19	1 hr	7.99157	0.0970723	0.578998	1.63297	0.716497	1.28846	2.97888	0	0.263254	1.12212	0.962094	0.679506	1.21033	0.76803	0.894264	0.70707	2.01327	1.06652	2.83523	1.74187	0.573486	1.18316
FBXL20	Fbxl20	1 hr	1.89479	1.23373	3.23474	3.78958	1.6657	0.814947	0.58097	0.575386	0.829225	1.15307	1.16626	0.234956	0.768025	0.951914	0.644416	0.787197	2.29458	1.95035	1.35723	0.744132	1.13379	0.638313
FBXL3	Fbxl3	1 hr	0	0.028674	0.34009	1.28697	1.42986	1.32716	1.23111	2.54868	1.63793	2.23662	2.15385	0.264142	1.29859	0.816995	3.60338	0.423554	1.48934	1.11482	1.14472	0.569375	0.177693	0.655291
FBXL5	Fbxl5	1 hr	0	0.0831588	0.0395555	0.124941	1.07027	0.542197	0.376464	0.385728	1.17158	0.614112	0.873618	0.252422	0.83793	0.539296	0.491442	1.5198	0.284894	0.372011	0.224313	0.40581	0.194495	0
FBXL6	Fbxl6	1 hr	0.423077	0.0527295	13.2854	0.111663	1.54094	1.85794	2.87903	0	0.669355	1.71774	1.00124	0	1.46278	0.565136	0	1.55521	1.01427	1.38896	3.40012	1.04218	2.06824	0
FBXO16	Fbxo16	1 hr	2.06072	0.153302	4.28413	1.5591	0.534994	1.35469	0	0	1.19409	0.874971	1.40579	0.43175	0.443221	0.828042	0	0	0.240904	0.954229	0.184589	0	2.35168	0
FBXO2	Fbxo2	1 hr	0.210429	1.14101	2.74576	1.04227	0.595187	1.74144	1.43197	2.32212	0.18482	1.27677	0.490589	2.35514	3.93613	0.873187	0	0	0.0354829	1.60876	3.74144	3.72971	2.21475	0
FBXO21	Fbxo21	1 hr	0.0243029	0.373808	0.0480981	0.328946	0.762231	0.63803	0.600698	0	0.700828	0.621046	0.479903	0.217943	0.409828	0.340219	0.574491	0	0.0696937	0.130673	0.27814	0.290027	0.851659	0.31323
FBXO31	Fbxo31	1 hr	0	1.14956	1.33618	1.85995	0.890503	0.808528	1.22561	1.32538	1.94997	0.771812	0.622759	1.73504	0.900741	1.27976	0.480202	1.72763	0.304884	0.742227	2.14873	0.545232	1.27602	0.782827
FBXO36	Fbxo36	1 hr	0	4.88744	0	0	0.92218	0.764156	1.05932	0	0.686838	0.59033	0.673857	0	0.185678	0.807048	0	0	0	4.02113	0.457704	0.123033	0	0
FBXO38	Fbxo38	1 hr	0.107892	0.104149	0.0802797	0.0875364	0.781255	0.856195	0.364476	0	0.935699	0.797457	0.874588	0.10812	0.723065	0.754602	0.275845	0.82621	1.04916	0.437864	0.528048	0.691848	0.824795	0
FBXO42	Fbxo42	1 hr	1.63216	0.395249	1.66777	0.0601118	0.959151	0.648416	0.696279	0	1.14222	1.18726	1.11942	0.151504	0.396286	1.01201	0.775141	0.68714	0.680168	0.0862105	0.939836	2.37366	1.32915	1.15842
FBXO6	Fbxo6	1 hr	21.474	1.83163	0	21.9543	1.20751	0.645681	0	0	3.85372	0.339012	0.426461	0	0	0.561826	0	0	0.505524	10.8963	0.212032	2.01251	1.19553	20.9852
FBXW5	Fbxw5	1 hr	0.0345008	0.752896	2.84227	0.74723	1.05162	0.900207	2.53586	1.1706	1.8938	0.913765	0.709947	3.28536	0.66457	1.05521	0.637405	2.93424	2.083	0.625112	1.02976	1.82303	0.437533	1.41322
FBXW8	Fbxw8	1 hr	0.650229	1.3227	0.193006	2.9562	0.775081	0.739942	1.68919	0.638771	0.677135	1.16839	0.90791	0.874554	0.980394	1.16602	3.18443	0	1.40154	2.28391	1.06654	1.40477	0.389492	1.04354
FBXW9	Fbxw9	1 hr	37.2682	0.240833	0.121633	0	0.817371	2.23966	1.52203	0	1.09145	1.21957	0.947923	0.741959	1.67366	0.84413	0	10.7466	4.37958	0.741959	1.69394	0.328408	2.70349	0
FCER1G	Fcer1g	1 hr	0	0.0442069	0	0	0.266802	0.466513	0.683906	13.0374	0.429067	1.31112	0.367177	0	1.55192	2.32476	0	16.5329	0.120139	0	0.608495	0.587171	1.73395	0
FCF1	Fcf1	1 hr	0	2.54769	0.514969	0.511192	1.4413	1.33248	0.737649	0	1.28643	1.19182	1.08714	0.0744664	1.86346	2.26583	1.01627	0.740167	0.514969	1.6361	0.671277	0.128607	0.0893956	0.883164
FCGR1A	Fcgr1	1 hr	0	0	0.516804	0	0	0.228355	0	0	0.536835	0.773203	1.52437	0	5.38438	0	0	5.02181	1.52437	0.636991	1.62453	0	0	9.8353
FCGR2C	Fcgr3	1 hr	0	0	0.204708	0.142819	1.71463	0.131711	1.92013	7.92965	0.475271	0.856123	3.43798	3.93229	6.56176	0.453055	0	0	0.0515737	2.41841	0.643481	0	0	0
FCGR3A	Fcgr4	1 hr	0.395386	0.173616	0.25135	0.793916	0.105027	0.60744	0.345802	0	0.137892	1.02969	0.836641	0.832783	3.41973	0.166042	0	23.2829	0.851931	0.096596	0.705751	1.10342	0.194335	1.58426
FCGRT	Fcgrt	1 hr	0.853368	0.864985	0.407738	2.28461	1.30012	0.600738	1.37624	1.24328	0.39587	1.3134	0.944767	2.94007	1.12548	1.38823	1.66193	1.21189	0.348276	0.780623	1.32823	1.82499	0.931567	2.25034
FDFT1	Fdft1	1 hr	0.405264	0.699599	0.761869	0.477439	0.882968	0.971589	0.892004	2.25513	2.21695	0.529085	0.664059	1.0353	0.857523	0.648104	0.536079	0.132025	0.501372	1.15156	0.660127	0.457023	0.81427	0.419177
FEM1A	Fem1a	1 hr	3.11851	0.175644	1.02227	0.925089	1.47902	1.24122	0.664552	0	18.0283	0.922906	0.841804	1.82065	0.623312	2.0141	0.716361	0	0.378513	0.138654	1.44352	0.0250428	0.114645	1.41239
FEM1B	Fem1b	1 hr	0.0724759	0.29741	0.0392341	0.0943006	1.0146	1.09294	0.765885	0	1.70138	1.40618	1.22723	0.257419	1.16132	1.15476	1.24199	1.50257	1.71665	0.605164	0.558045	0.762479	1.24218	0.465321
FEN1	Fen1	1 hr	0	0	1.34539	1.33553	1.73355	1.70066	0.341165	0	3.3609	1.24013	1.55216	0.755639	0.474624	1.10291	0	0	0.357613	2.45019	1.23402	0.19032	0.233553	0
FERMT1	Fermt1	1 hr	4.68423	0.252208	0.72445	1.41901	2.06873	0.0913347	0.739604	0	0.237678	0.379662	0.47328	2.51254	0	0.720922	2.94326	0	0.594298	0.314067	0.0367415	0	2.28731	0
FERMT2	Fermt2	1 hr	0	0.325748	0.089075	0.292302	1.23196	0.726134	0.815209	0.719943	0.874292	1.29711	0.93493	0.764527	0.849402	0.581772	1.63054	2.59718	0.668669	0.4978	0.310347	0.262185	0.246784	0.192057
FERMT3	Fermt3	1 hr	6.78196	1.93572	0.780101	2.97914	0.513436	1.01972	1.16926	3.83412	0.559706	1.2229	1.70415	4.79304	2.31572	3.83166	2.91543	4.80645	2.83183	1.69856	3.04329	1.54277	0.745231	1.09751
FES	Fes	1 hr	1.15844	2.99427	5.39868	0.161569	0.549011	0.817032	1.64163	1.31363	0.587377	1.44364	1.23733	2.8367	1.46298	1.9933	1.09586	0	0.780179	1.38474	2.19994	0.488598	0.0142656	2.54339
FGA	Fga	1 hr	2.19488	0.208484	0.126263	0.530278	0.28716	0.0899932	0.329975	0	0	0.00859026	0.148898	0.323021	0.522097	0.650951	0	0.270252	2.72434	0	0.0436331	0.509825	0.978744	0
FGB	Fgb	1 hr	0	0.013921	0	0.3199	5.82941	0.139021	0.60334	0	0	0.0136369	0.52237	1.06302	0.36261	0.0358917	0	0	0.271129	0.250958	0.0167621	0	0.128793	0.107107
FGD3	Fgd3	1 hr	1.77511	0.443509	0.969164	0.86899	0.204751	0.282801	0.154665	0	0.166802	0.356343	0.314451	0	0.407659	0.937565	0	1.686	1.64272	0.156099	1.07092	0.81624	1.18738	0.44018
FGF1	Fgf1	1 hr	0.709816	0.0213032	0.387734	0.698728	0.100933	0.0288266	0.272902	0.348295	0.166901	1.75252	0.140807	0.161595	0.218853	0.0118791	0.113881	0.195926	0.653865	0.018967	0.0463285	0.362392	0.465938	0.0923402
FGF18	Fgf18	1 hr	0	7.21305	0.337584	12.5041	1.15454	0	0	0	2.00525	0.803451	0.749437	0	13.5776	0.517629	5.34734	0	10.8815	2.05926	0	1.60915	0.297074	2.54539
FGF9	Fgf9	1 hr	2.45558	0.233514	0.494656	0.196266	0.741984	1.05398	0.309032	0	0.501103	0.706783	0.521978	1.71666	0.846257	0.306986	0.578156	0.290613	0.167307	0.875523	1.13022	1.01346	0.0508573	0.631674
FGFR1	Fgfr1	1 hr	0.0225595	0.515495	0.267969	0.246666	0.779793	1.35513	2.34715	0.620917	0.673346	1.54784	1.39472	1.23102	0.992124	1.70027	3.39068	1.20664	0.900232	0.251364	1.08246	0.998475	1.05514	1.28206
FGL2	Fgl2	1 hr	0.253756	0.125797	1.26584	2.58753	0.476363	1.55176	0.367452	0	0.536822	1.0419	0.43555	0.433111	3.24647	0.675273	0	4.40864	1.08906	1.62846	0.484967	0.0773002	0.330274	0.167024
FGR	Fgr	1 hr	2.62468	0.690359	0.510998	0.494599	0.221237	0.310698	0.765911	0	0.269848	0.465755	0.544088	0.59753	1.3589	0.698998	1.57428	2.99146	2.41779	0.697534	1.83988	0.772646	0.488156	0.165598
FH	Fh1	1 hr	0.146845	0.311749	0.0301717	0.840348	0.855434	0.702272	0.0977235	3.89244	3.15703	0.622681	0.618371	0	0.183705	0.258094	0	0.608189	0.709852	0.112438	0.0131537	0.083901	0.0369343	0
FHL1	Fhl1	1 hr	1.99923	2.34574	0.591874	2.64052	0.953223	0.463068	8.48723	0	55.6072	2.56474	0.80511	2.54125	0.567669	1.12885	13.3273	0.456584	0.949332	3.61709	0.30098	0.162664	0.324897	6.88536
FHOD1	Fhod1	1 hr	0.275695	1.4829	0.807158	1.69064	0.78743	0.941569	2.67386	1.52395	3.45491	1.58014	1.42002	1.11842	1.08634	1.14453	1.35377	0.542124	1.32128	0.0316845	3.21777	3.47035	1.0979	1.61442
FIBP	Fibp	1 hr	9.55002	0.962289	0.358996	0.305116	1.11087	0.854937	0.947186	0	1.68457	0.964942	0.960044	0	0.630845	1.24026	1.77784	1.30924	0.672479	2.04805	1.008	0.0444918	0.203683	2.26276
FIGN	Fign	1 hr	0.463282	0.0344648	0	0.791987	1.33522	0.126371	0.708052	0	0.844505	1.74669	0.782374	1.99403	1.0534	2.58744	1.82382	0	1.26629	0.158491	0.190142	0.393883	0.528695	0.265168
FILIP1	Filip1	1 hr	0.855649	0.158307	0.275667	0.768173	0.454571	0.234275	0.17599	0	6.24926	0.856094	0.391298	0.334495	0.212887	0.394854	0.757603	0.203256	1.45396	0.709641	1.06088	0.0353166	0.226668	0.671954
FIS1	Fis1	1 hr	0.976045	0.295394	1.41394	0.643268	1.26944	0.941857	1.21337	1.22175	2.76263	0.783376	0.804145	0.189234	1.17814	1.33279	0.189793	0.434623	1.83627	2.14947	0.662838	0.673143	0.219828	0.58927
FKBP1A	Fkbp1a	1 hr	0	1.10113	0.528999	0.109383	1.19022	1.16473	0.60388	1.15212	1.00302	1.47714	1.45032	1.32226	3.07343	1.96055	2.86585	0.237628	2.03713	0.810987	0.468147	1.08056	0.316016	1.16539
FKBP3	Fkbp3	1 hr	1.62396	0.112655	0.213765	0.0775338	0.874018	1.05947	1.22632	0	7.69481	0.721137	1.03188	0.602285	0.91801	0.797821	0	1.47266	0.245605	0.419752	0.600219	0.0868914	2.95807	0
FKBP4	Fkbp4	1 hr	0.209734	0.219222	2.58753	0.837531	1.24075	1.00146	0.614589	0	1.24991	0.648823	0.844325	1.06059	0.770587	0.460349	0.921899	0.259166	0.629378	1.68191	0.567588	0.333841	0.655148	0.513002
FKBP5	Fkbp5	1 hr	0.114922	0.142643	0.218824	0.263976	0.967248	0.312859	0.654171	0.267419	0.23337	1.13755	0.162998	0.707747	0.501527	0.193001	0.0508258	0.584618	0.724704	0.0334266	0.227504	0.14899	0.100177	0.0232717
FKBP8	Fkbp8	1 hr	1.13425	0.466466	0.365177	0.140061	0.751252	0.928597	0.715934	1.82137	1.15563	1.19765	1.16349	1.02074	1.1796	1.19148	2.04107	1.90849	2.38409	1.34402	1.34586	1.34684	3.19899	1.03175
FLII	Flii	1 hr	0.312747	1.62909	1.70512	0.713032	0.847037	1.15928	1.48055	0.363995	2.03268	1.18962	0.787938	1.07929	0.798226	1.6051	1.13304	0.143427	0.935534	0.514423	1.18091	1.28742	1.6653	1.18873
FLNA	Flna	1 hr	0.193724	0.303313	0.378472	0.3341	0.593835	0.864098	0.496563	0.143184	0.121496	2.45533	1.01461	0.484636	0.816807	1.67064	3.52776	0.615641	0.702946	0.428591	0.457779	0.329359	0.348735	0.300228
FLOT1	Flot1	1 hr	0.192446	1.9143	3.26405	3.2157	0.107677	2.36524	0.0323566	0	2.76163	2.44654	2.18666	0	0	2.76163	0	0	2.76649	0	2.22178	3.07981	3.12192	2.85532
FLOT2	Flot2	1 hr	0.310767	0.322552	0.221837	0.279965	1.51698	1.57855	1.05186	0.73167	0.96724	1.27693	1.30558	1.62076	1.0819	0.979025	0.321509	0.332669	0.440441	0.429595	0.819557	1.18442	0.846222	1.45378
FLT1	Flt1	1 hr	1.75178	0.804128	0.33684	0.737453	0.336948	0.107473	0.715711	0.555878	0.719025	0.658998	0.391626	1.07802	1.39803	0.2455	0	0.23359	0.403277	0.300113	0.144134	0.638144	1.18742	0.350872
FLT3LG	Flt3l	1 hr	5.54119	2.67476	0.449892	10.6838	1.0929	0.526561	0	0	1.50663	1.51531	1.87117	6.15165	1.07627	4.26457	8.39098	0	15.5451	3.13622	1.51097	2.18798	4.23997	2.62557
FLYWCH2	Flywch2	1 hr	0	0.242581	0.0877783	0.217064	0.555929	1.42521	0.823347	0	1.53102	0.923714	0.73795	2.59695	3.10116	0.233055	2.85348	2.63199	3.89967	0.229993	0.177598	0	2.94262	1.23502
FMNL1	Fmnl1	1 hr	0.800173	3.01705	2.49688	1.99302	0.116561	1.01013	0.969362	0	0.771079	1.46525	1.44061	7.67466	2.62752	3.49941	1.41559	2.2456	1.66687	5.52245	5.15887	4.66854	2.30712	4.5744
FMNL2	Fmnl2	1 hr	0.0693775	1.0443	0.313866	0.269662	1.88232	1.43376	1.60782	1.45507	0.504272	1.35979	1.37429	1.19333	1.22633	1.50106	0.691569	0.525609	0.483662	1.35603	1.39387	1.47937	0.84592	1.16969
FMO1	Fmo1	1 hr	0.126371	0.883552	0.0742979	0.0359454	2.32137	0.0807168	0.850254	0.603851	0.102621	0.043969	0.0709281	0	0	0.266221	0	0.254266	0.131185	0.311795	0.0650709	0	0.575929	0
FMO5	Fmo5	1 hr	0	0.270639	0	0.0248262	2.15397	0.350607	0.537985	0	0.108002	0.288541	0.195738	0.718186	0.0792074	0.607144	0	0	0.0842739	0.402286	0.315141	0.193458	0.0842739	0.0955048
FMR1NB	Fmr1nb	1 hr	0	0.859551	2.60899	11.6697	0	0	0	0	0	0.637079	0.262921	0	0	2.32584	0	0	0.657303	0	0	0	0	0
FN3K	Fn3k	1 hr	0.0773601	0.691895	0.0511297	0.690838	1.11033	0.739071	1.7675	0.905927	0.616923	0.431784	0.184161	0.879579	0.0923153	0.739306	0.443998	0.346476	0.0945469	0.0124496	0.39052	0.146381	0.460676	0.142114
FNBP4	Fnbp4	1 hr	0.389403	0.911982	0.670938	0.69066	1.53709	1.50675	1.08725	0.271047	1.40133	1.88306	1.84087	0.537932	1.20501	1.82385	1.08405	0.547603	0.102623	1.41757	1.13401	0.865107	0.0871947	0.736433
FNDC3A	Fndc3a	1 hr	0.0137955	0.543649	0.336453	0.314586	0.819316	0.875732	0.391777	0	0.514905	0.951325	1.19349	0.190407	0.821521	0.743583	0.599033	0.448395	0.523926	0.728493	0.434458	0.396186	0.624419	0
FNDC8	Fndc8	1 hr	7.75769	35.5881	66.1125	0	0	0	0	0	0	0.702176	0.459115	2.7952	0	1.09377	0	21.3961	0.43886	2.14704	1.19505	0	6.73818	126.736
FOPNL	Fopnl	1 hr	0	0.282398	0.144569	1.87173	0.0853003	0.869041	0	0	4.43771	1.1454	1.45104	0	0.479727	0.584551	0	0	2.22013	0	0.0743763	2.30195	0.91785	0
FOS	Fos	1 hr	0	0.0209012	0.455986	4.84653	0.0350307	0.235366	1.35957	0	0.0584823	0.143787	3.32947	0.720344	0.196641	0.2818	0	0.120629	0.585702	1.25993	0.126902	0.660777	0.713543	0.216253
FOSB	Fosb	1 hr	0.340562	0.179634	0.815917	4.07238	0.0139821	0.0298692	0.262575	0	0.0196969	0.0249545	4.62119	0	0.0610718	0.0894171	0	0	0.062291	0.131592	0	0.00830547	0.223333	0.0888456
FOSL1	Fosl1	1 hr	0.341171	3.74487	2.7919	0.31916	0	0.562781	0	0	0	0.570785	0.481241	0.207104	2.67284	0.654827	0	0.991496	0.0575288	0.15908	1.31366	0.202601	3.5908	0
FOSL2	Fosl2	1 hr	0.0825806	1.4296	1.80961	3.09854	0.493934	1.25968	1.16542	1.39486	0.210379	1.01719	1.47264	1.37917	1.85218	1.26215	1.03737	1.36962	1.07219	1.13346	1.11391	1.84257	2.86186	1.64821
FOXA1	Foxa1	1 hr	3.3869	0.0902764	11.6217	6.20942	0	0	0	0	0	0.124053	0.0503582	0.254248	0.202047	0	0	0	0.467349	0.195292	0.1087	0.439099	0.135722	0
FOXI1	Foxi1	1 hr	0.140468	0.452091	0.0496346	0.0359423	0.472507	0.56224	0.160762	0	0	1.34307	0.0635714	0.111861	0.262966	0.0198049	0	1.72327	0.247073	1.39417	0.0638159	0.0495123	0.27568	0.138268
FOXN3	Foxn3	1 hr	0.0274288	0.128899	1.90393	0.940061	0.634885	0.788599	0.547411	0	3.10352	0.982974	1.08223	1.33722	1.71105	1.55749	1.5914	0.127452	3.11663	1.72858	1.37438	1.11429	0.899763	1.55878
FOXO3	Foxo3	1 hr	0.25327	1.0162	0.770349	1.6651	0.764541	0.793659	1.13288	2.73313	0.949842	1.1766	0.940889	0.918788	0.679096	1.1042	1.04405	0.308252	1.68637	0.306612	1.12923	1.35601	1.73955	0.43564
FOXO4	Foxo4	1 hr	0.245128	0.144275	0	0.442319	1.64228	0.837636	0.72231	2.22016	5.0378	1.571	0.452903	2.02763	0.384734	1.17412	8.28921	1.67885	0.840593	1.63605	2.53906	0.470801	2.69283	0.362945
FOXP2	Foxp2	1 hr	0.864913	0.8246	0.584074	0.527617	0.60367	0.430847	0.140909	0	0.990751	0.287044	0.756384	0.110535	0.356659	0.254197	0.166898	0.456322	0.678371	0.0705946	0.539841	0.802063	0.334916	0.052771
FOXQ1	Foxq1	1 hr	1.05011	0.72537	0.245681	5.23651	1.70783	0.980603	0.80125	3.52338	0	0.537793	1.76089	0.10984	5.28109	1.05807	0.763045	1.44358	0.0172454	2.54543	1.45419	2.04876	5.71408	5.31743
FPGS	Fpgs	1 hr	0.699394	2.54547	2.63197	2.5789	1.16422	2.13779	2.72068	0	1.07629	1.52126	1.25315	3.34979	1.42979	2.84833	2.47033	2.59986	2.53631	1.88204	1.67197	2.2436	1.82346	4.94111
FRAS1	Fras1	1 hr	0.574925	0.454552	0.251328	0.0981365	0.493709	0.52808	0.222781	0.249185	0.287385	0.355738	0.31415	0.244819	0.33487	0.240717	0.150526	0.678819	0.445053	0.640641	0.166055	0.180656	0.515776	0.173285
FRG1	Frg1	1 hr	0	1.61764	0.63194	0.789786	0	2.3952	0	0	2.71673	2.00614	1.31751	0	0	1.05407	0	0	2.65448	0	0.882326	4.77706	0.377941	0.314302
FRMD4B	Frmd4b	1 hr	0	0.311726	0.280037	0.295646	0.883476	0.80748	0.595194	0	0.176538	0.585407	0.99157	0.616341	0.660082	0.621816	0	0.0997234	1.10388	0.224213	0.728462	0.567879	1.06168	0.551264
FRMD6	Frmd6	1 hr	0	0.136509	0.548141	0	0.672588	0.364534	0.463325	0	1.99996	1.03616	1.91801	1.11581	0.966282	0.511381	6.30103	0.379467	3.97483	0.289674	0	3.60398	1.25002	0.446477
FRMD8	Frmd8	1 hr	1.21314	0.244044	0.821764	0.435029	0.748873	0.886285	1.56368	0	0.386349	1.03052	0.885512	2.04108	0.79047	2.09324	0.501095	0.255248	0.622666	1.23554	1.42241	0.582228	0.674179	1.10689
FRS2	Frs2	1 hr	0.431432	0.0602332	0.408369	0.0248367	0.742481	0.743664	1.02574	0	1.25265	1.02929	1.46596	0.492341	1.31575	0.442921	1.95644	0.294999	1.33839	0.366299	0.463027	0.773147	3.63452	0.414789
FRZB	Frzb	1 hr	0	1.42472	0	0	0.626066	0.153444	0	0	0.451274	0.963874	0.194069	0.527996	0.0425657	0.345572	1.16066	0	1.31682	0.0236764	0.560082	0.146069	0	1.59072
FSTL3	Fstl3	1 hr	0.438332	0.426397	1.99606	0.117386	0.497882	2.17189	1.44395	2.45838	0.205395	1.09399	1.25361	0.63063	1.28378	1.66948	4.71871	0.153434	0.584606	0.0112	0.610494	1.10446	1.48973	0.45149
FTH1	Fth1	1 hr	0.0107707	0.615272	0.47746	0.300456	0.726568	0.67026	0.486258	0.564678	0.655282	0.362371	0.441973	0.672783	1.12452	0.625914	0.376758	0.781539	1.90057	0.792778	0.200148	0.529368	1.41164	0.314089
FTL	Ftl1	1 hr	0.0312353	0.723043	0.764558	0.168183	1.25688	0.342245	0.679919	1.70183	0.18425	0.389124	0.377414	1.07631	0.761121	0.710618	0.332606	1.44434	1.95363	0.550582	0.340771	0.546426	2.02888	0.230322
FUBP1	Fubp1	1 hr	0.291058	0.206282	0.172624	0.37045	1.24384	1.33833	0.873007	0.551197	0.801737	1.31053	1.32337	0.466541	0.971861	0.905617	0.354134	1.28731	0.530212	0.570253	0.879272	0.200732	0.170981	0.352752
FUCA1	Fuca1	1 hr	2.79018	0.440537	0.120796	1.25857	0.591411	1.66477	0.318711	0	0.597935	0.542997	1.15165	0.400226	0.690506	0.149432	0	0.516146	0.0685356	1.55723	0.218037	0.115371	1.13496	0
FUCA2	Fuca2	1 hr	0	0.0403441	0.0400482	1.06088	1.2483	0.779165	0.351458	0	0.440037	0.629921	0.727576	0.0408374	0.644816	0.709228	0	0.827598	1.24968	0.0902565	0.0799978	0.0399496	2.03447	0
FUOM	Fuom	1 hr	0.486228	0.0916887	4.47206	0	3.36284	0.310568	1.78592	0	0.112064	0.464309	0.62268	2.09063	0.664048	0.580386	1.10428	3.01924	0.0200665	1.19967	0	0.0673001	0.548897	1.5158
FURIN	Furin	1 hr	0.6341	0.49893	1.39304	0.356862	0.741232	1.55895	0.51603	0.496073	0.520846	1.15197	1.16352	0.166555	0.770699	0.913542	0.407265	0.708052	0.618999	1.70616	1.242	0.373514	1.22098	0.960476
FUS	Fus	1 hr	0.632796	1.76622	1.41941	0.996912	1.19741	1.82829	1.62158	0.514302	1.0221	1.99112	1.85602	2.3914	2.47955	2.31371	0.936586	0.468668	1.60836	1.30991	1.55721	2.28664	2.47538	1.50048
FUT9	Fut9	1 hr	0.21881	0.0789532	2.2314	0	0	0.0540381	0	0	0.0401964	0.0913554	0.286468	0.0458438	0.0470619	0	0	0	0.535398	3.5478	0.35158	0.33497	0.649122	0
FXR2	Fxr2	1 hr	0.773516	0.956164	0.58274	2.27553	1.26274	1.3916	1.38721	1.48192	2.74365	1.32164	0.976895	1.53205	0.953699	2.05854	2.46922	0	2.48539	1.04146	0.962557	0.341461	0.251324	0.673699
FXYD3	Fxyd3	1 hr	0	9.16342	0	2.00618	0	1.469	1.26212	0	1.18215	1.39946	0.777091	5.55264	1.90883	0.399845	0	42.5366	0.73363	0.318138	5.51961	0.704076	0.589337	1.9662
FZD7	Fzd7	1 hr	0	0.109565	0.0396462	0	1.01666	0.728845	0.111563	0	2.10709	2.19437	0.704105	2.00198	0.959961	0.837181	1.19538	1.28927	0.310562	0.468379	0.487894	0.936604	0.34652	1.13361
FZR1	Fzr1	1 hr	1.40799	0.788376	3.45609	0.12369	0.738849	1.14074	1.8625	1.68484	0.806756	1.27643	0.798243	1.6927	0.964431	1.32028	0.702284	0	0.105439	0.708023	2.11033	1.45364	0.851833	1.21052
G0S2	G0s2	1 hr	0.235744	0.40953	0.00959488	1.29531	0.328606	0.33597	0.780495	0.75543	6.8175	0.453972	0.438501	2.90584	0.110973	0.291379	0.305958	0.0737095	1.03922	0.21105	0.288776	1.14291	0.832003	0.457245
G3BP2	G3bp2	1 hr	0.415203	0.288278	0.0889566	0.172631	1.54678	1.06465	0.733061	1.27938	2.08695	1.1157	1.14823	1.03308	1.1817	0.51373	1.51711	0.061583	0.939777	0.925951	0.762734	0.375588	0.537593	0.662871
G6PC	G6pc	1 hr	0.205836	0.0194967	0.230433	0.0415676	3.7346	0	0.0894752	0	0	0.0049576	0.000810377	0.491184	0.0238346	0.0143008	0	0.283298	0.0475739	0.0151588	0.0248833	0.0103919	0.279437	0
G6PD	G6pdx	1 hr	0	0.433232	2.55803	5.04211	1.20278	1.16506	0.627341	0	0.394707	1.23657	0.749268	1.03178	1.29348	1.4519	1.32849	2.07911	0.0570433	0	0.740887	0.713312	0.533801	1.49867
GAA	Gaa	1 hr	0.950987	0.48447	0.94536	0.270907	1.10404	1.15381	1.63511	1.25716	0.451934	0.812482	0.979283	1.88612	1.28498	0.798137	0.372318	0.0785455	0.654401	1.26969	0.934224	0.833843	0.685668	0.794253
GAB2	Gab2	1 hr	4.59424	1.4364	0.266723	1.89473	0.810453	0.854342	1.00562	1.94999	0.579802	1.42549	1.01673	0.939112	0.997464	1.09992	2.50756	0.55397	2.10946	0.579301	1.48334	1.83199	0.935141	2.80066
GAB3	Gab3	1 hr	0	3.47914	0.826031	2.2843	0.477547	0.296574	1.0338	0	0.668489	0.757681	0.794833	0.118448	1.15536	1.71873	4.68965	3.017	0.0985127	0.0875093	0.787714	0.092558	0.0286088	1.27406
GABARAP	Gabarap	1 hr	0	0.0716786	0.205892	1.46997	1.0373	1.15677	0.688174	1.43741	2.18056	0.55455	0.993353	0.768583	1.10096	0.865807	0.431428	2.8078	2.02488	3.6267	0.392669	0.940258	0.385177	0.364174
GABARAPL1	Gabarapl1	1 hr	0.274861	0.222063	0.251091	0.0491821	1.46631	1.54449	1.11237	1.18212	0.551107	0.858816	1.33505	0.673062	0.644163	0.851431	0.45864	0.961001	0.110724	0.410279	0.828122	0.724629	1.012	0.415484
GABARAPL2	Gabarapl2	1 hr	0	0.0293598	0.0148282	0.796074	1.24131	0.837099	0.730534	1.51198	2.41709	0.773437	1.04796	0.489922	1.06842	0.759894	0	0.851037	0.889195	0.0473513	0.206507	0.299035	0.390376	0.358841
GABBR1	Gabbr1	1 hr	1.37268	8.8389	6.79398	11.8346	0	3.57567	0	0	0.920626	6.288	6.16005	0	0.221085	11.2215	0.32309	0	6.88419	0	8.01557	11.3455	6.34395	15.4208
GABPB1	Gabpb1	1 hr	0	0	0.319543	0	0.624248	1.57425	1.80511	0	2.12465	1.11046	1.39929	0	1.55044	0.700855	1.11978	0	0.145623	0.522104	0.555232	1.82098	0.116982	0.804724
GABPB2	Gabpb2	1 hr	0.23567	0.194362	0.0219743	1.68103	0.79925	1.07367	0.587003	0	1.04778	1.27681	1.23209	0.576782	0.731795	1.32612	0.675241	0.241887	0.367771	1.31582	0.753513	0.257644	0.445873	0.73205
GABRB3	Gabrb3	1 hr	0.538777	1.15766	2.20864	0.14399	0.965132	1.09839	1.95659	5.27997	0.12752	0.121655	1.35331	0.0516567	0.126022	0.197144	0.296465	0.909982	3.04488	2.06415	0.0651324	0.760502	0.653196	0.920463
GABRR2	Gabrr2	1 hr	2.03373	3.66913	4.08559	0.322762	0.416461	0.411063	0.652002	0	0.367237	0.167102	0.330319	4.22851	0.805071	0.0496558	0	0	0.436323	0.572121	0.685465	0.80723	0	1.33272
GAD1	Gad1	1 hr	0.101554	1.28952	1.45808	0.0437782	0.100958	0.684817	0.108105	3.02472	0	0.0574775	0.400407	0.23944	0.0744528	0.0446717	0.428252	0.519978	0.243461	0.0713258	0.0777287	1.02775	0.202512	0
GADD45A	Gadd45a	1 hr	0	0.0415003	0.00700267	0.986589	1.1188	0.577313	0.783891	0	0.171782	0.372308	0.473331	0.255489	0.391199	0.242759	0.153353	0.103059	0.563497	0.567732	0.225225	0.734384	1.04399	0.733624
GADD45B	Gadd45b	1 hr	5.67472	0.074476	0.31838	1.36886	0.239974	0.816131	0.886323	0	0.133467	0.450275	0.632004	1.15601	0.6379	0.364284	0.467764	0.338345	0.95907	0.152725	0.780799	2.2871	3.41473	1.23874
GADD45G	Gadd45g	1 hr	27.9525	0.648125	0.0635833	0.813018	0.381924	0.358186	2.45219	0	0.94188	0.604465	0.202195	0.17549	0.211944	0.127167	0	1.6095	0	4.83402	0.682037	0.712133	0.0936794	0.988508
GAK	Gak	1 hr	0.147982	1.01386	0.573855	0.595742	0.911465	0.789682	1.47354	0.745412	0.246887	0.833493	0.597926	0.834612	0.937828	1.23741	0.838648	0.0521036	0.880569	0.505277	1.03418	0.889798	0.958009	0.601393
GAL3ST1	Gal3st1	1 hr	0	0.0213431	0	0	2.32464	0.63276	0.758307	0	0	0.258628	0.0564964	0.801998	0.125548	0.791201	2.46776	0	0.0424351	0.665402	0.203638	0.101693	0.991574	0
GALE	Gale	1 hr	0.969031	1.42066	1.89771	0.314644	0.901936	0.925887	1.99187	3.33231	0.295614	0.572527	0.491324	1.54418	1.1508	0.967227	0	0.62289	1.08091	0.150104	1.81191	0.496245	0.0216543	0.38256
GALK1	Galk1	1 hr	28.8012	1.87722	1.50377	0	1.1834	0.713221	1.25049	0	0.720496	0.774385	0.530537	4.01446	0.455362	0.586312	1.04841	8.77313	0.0309862	0.32522	0.433537	0.815071	0.366445	0
GALK2	Galk2	1 hr	0.463892	0.0321199	0.768992	1.04668	1.13362	0.560723	1.31472	0	0.67224	0.691009	0.726741	0.66792	1.04763	0.615303	0.586246	0	0.0331408	0.0143715	0.06369	0.661795	0.0103663	0
GALNT1	Galnt1	1 hr	0.133812	0.107958	0.0472826	0.101553	1.37224	1.0153	0	0	2.83276	1.36607	1.35524	0.275893	2.52508	0.589519	1.16215	0.545497	0.235365	0.216149	0.638315	0.195652	1.19196	0.131716
GALNT11	Galnt11	1 hr	0.0182411	0.361934	0.334813	0.30245	1.78416	0.746229	0.700813	1.85204	0.430298	0.641436	0.945517	1.50642	0.473788	0.505082	0.465122	0.820959	0.208409	0.752434	0.49211	0.304911	0.483364	0.692495
GALNT14	Galnt14	1 hr	0.163232	0.951335	2.64081	0.7147	1.00985	1.37337	1.53098	0.883733	0.0224352	0.412772	1.02956	0.146687	0.319894	0.470813	0	0.0840579	0.0378261	0.882046	0.588021	1.03089	0.610456	0.402649
GALNT16	Galnt16	1 hr	0.63806	0.417073	0.267083	0.657369	0.528899	1.62447	0.376113	0	0.366946	0.590144	0.656069	0.552955	0.484689	0.635069	1.76588	0.532085	0.945257	0.0311423	0.752227	0.59502	0.562317	0.884468
GALNT3	Galnt3	1 hr	0.634647	0.991768	0.0927092	0	0.868423	0.762498	0.523717	0	0.0268316	0.5941	0.796338	0.0916079	1.22444	0.0379447	0	0	0	2.51346	0.37364	0.452633	0.0497586	0.491579
GALNT5	Galnt5	1 hr	1.04747	4.9907	2.12813	0.0863352	0	0.0631363	0	0	0.0787001	0.266934	0.0833986	0.121574	0.907694	0.0475724	0	1.59779	1.10944	0.0537392	0.0939702	2.02682	0.808144	0
GALT	Galt	1 hr	0.75071	0.278558	0.0379251	1.00487	3.01563	0.518162	3.08501	0	1.10335	1.07807	0.841407	0.856695	0.75659	1.68855	1.76837	3.76237	0.555352	0.908144	0.805687	0.549619	0.146702	1.08439
GAMT	Gamt	1 hr	0.208237	0.283044	2.21275	0.266251	0.946533	0.239381	0.922106	0	18.3398	0.563034	0.405177	0	0.100455	0.399681	1.35904	0	2.01184	0.055876	0.969433	1.61124	0.040304	0.712037
GAN	Gan	1 hr	0.20819	2.24646	1.4145	0.664752	0.891712	0.754505	1.12237	1.7554	1.15092	0.849942	0.630781	1.84396	0.0857873	1.20287	0.552264	0.654046	2.09419	0.350287	1.39322	1.5069	0.298075	0.479827
GAPDH	Gapdh	1 hr	0.0662348	0.267487	0.639277	0.301138	0.922198	0.715343	0.581812	0.748387	3.37637	0.42807	0.46825	0.494016	0.71138	0.449201	0.559466	0.634565	0.645995	0.913364	0.117166	0.306576	0.971666	0.287244
GAR1	Gar1	1 hr	5.62688	0.342959	2.09359	1.23719	0.508013	0.832331	0.742203	4.82712	0.435078	0.544572	0.629995	0.165598	1.19683	0.512176	1.70032	1.36025	0.977478	0.273824	1.80528	2.06318	0.60339	0.422047
GART	Gart	1 hr	0.567102	0.0167866	0.847328	0.590461	1.06753	1.1555	0.414202	0	1.11085	1.06389	1.43557	0.461473	0.71454	0.783191	0	0	0.756348	1.13761	0.481823	0.417844	0.628073	0.089555
GAS2	Gas2	1 hr	29.1112	0.0786639	0.0683343	0	0	0.254267	0.799882	0	2.73788	0.226192	0.0942908	0	0	1.09891	0	0	0.148852	2.26616	0.0468805	0	0	2.93652
GAS6	Gas6	1 hr	0.157351	0.473894	0.242467	0.249493	1.07928	0.690197	1.57351	0.511734	0.987636	1.38625	0.584772	1.4537	0.59772	0.946683	4.39071	0.265888	0.362346	0.758685	0.94936	0.680361	0.00739413	0.287568
GAS7	Gas7	1 hr	6.76457	1.74231	5.17773	1.26447	0.211883	0.432548	0.470355	2.29356	1.18755	1.2952	0.983721	0.550604	1.56514	0.862494	2.0207	2.79546	2.6931	1.34504	1.91671	2.60797	1.81898	1.52619
GATAD1	Gatad1	1 hr	0.539716	0.0526505	0.870886	0.187702	1.68746	1.2824	1.9971	6.07927	1.08961	1.7588	2.25086	2.67979	3.09923	1.24952	0.715674	1.05565	0.762551	1.02874	1.59654	0.44244	1.07836	2.53378
GATAD2A	Gatad2a	1 hr	1.06977	1.12394	0.881289	0.5846	0.880927	1.03711	0.962671	0.560846	0.413108	1.0385	1.0007	1.12182	1.43444	1.52703	0.161009	0.758337	1.20958	0.956578	1.36661	0.953299	1.30219	0.668486
GATM	Gatm	1 hr	0	0.000927517	0.0191941	0.00320812	1.59869	0.0680033	0.44463	0.0821234	0.322689	0.0638677	0.0430913	0.22351	0.00708186	0.0958398	0	0.985765	0.0718989	0.0777477	0.0538942	0.00780205	0.34807	0.191156
GBA	Gba	1 hr	0.526902	0.10906	0.348246	6.2327	0	1.81883	0	0	1.02021	1.01567	1.53991	0	0	1.39805	0	0	1.58977	0	0.0853283	1.62524	1.39592	0
GBP2	Gbp2	1 hr	0.605818	1.38749	0.186238	0.227992	0.569278	0.969409	0.528838	0.984777	0.542212	1.10201	1.38545	0.63243	1.89407	1.3038	1.40259	0.310684	1.59032	0.280083	2.09346	0.921897	1.14867	0.908614
GBP3	Gbp7	1 hr	0.382646	0.193466	0.247974	0.0108655	0.5443	1.1151	0.672875	0	0.319445	0.777184	1.71874	0	2.47908	0.571766	0.268679	0.171433	0.764749	0.486049	0.698409	0.138293	0.0429187	0.372626
GBP5	Gbp5	1 hr	2.81403	0.740163	1.81595	1.47483	0.149602	0.395591	0	8.02452	0.191045	0.314903	0.841572	0.501395	1.26997	0.925556	0	4.99025	0.200621	0.610026	3.54022	1.89758	2.21452	0.96904
GC	Gc	1 hr	0.351579	0.0260089	1.257	0.457451	0.308435	0	0	0	0	0.0192772	0.0630334	0	0.239588	0	0	0	1.15602	0	0.0979159	0.701017	3.80954	0
GCFC2	Gcfc2	1 hr	0	1.25224	0.873235	1.90212	1.03148	1.59276	1.03525	0.948151	2.01067	1.12321	1.8257	1.40433	1.13463	1.58198	0.630268	0.927994	0.582193	0.719198	0.717473	2.64471	0.296648	1.59631
GCGR	Gcgr	1 hr	1.74476	3.89414	0.121405	0.124528	0.484841	2.2702	2.27684	0	0	0.83188	0.445023	1.13754	0.15283	1.31204	0.815485	0.386858	0.0614834	0.362264	3.29649	3.23051	0.440143	0
GCH1	Gch1	1 hr	0.826573	3.85035	7.48811	0.670629	0.803147	0.313636	0	7.35874	0.237762	0.222028	0.417483	1.42692	1.20245	0.277622	0	0	0.446853	1.06573	0.73042	1.30734	0.248601	0
GCHFR	Gchfr	1 hr	0	2.34265	2.55096	0	3.78332	0.441485	0	0	0.195891	0.412978	0.435637	2.33461	0.572322	0.277024	0	0	0.308454	3.16933	0	0.159344	2.88646	0
GCNT1	Gcnt1	1 hr	1.97685	1.7653	0.107587	1.57015	0.0605486	0.304473	0.293517	0	0.171596	0.301096	0.495098	0.034105	0.890353	0.405305	0.26732	0	0.491144	0	0.356619	0.188731	0.14647	0.0931708
GCSH	Gcsh	1 hr	0	0.795214	0	0.817168	1.55419	1.22837	2.22012	0	3.729	0.612266	0.545708	0	0.970496	0.317458	0	0	2.91462	9.14671	0.111511	0.141131	0.247764	0.394122
GDA	Gda	1 hr	0.251306	0.711491	0.281337	0.588457	2.2294	0.1235	2.13302	1.73773	0.145732	0.248047	0.145208	0.653292	0.0807812	0.0272957	0	0.515067	0.453492	0	0.121579	0.0235709	0.76876	0.64526
GDF10	Gdf10	1 hr	0	15.3904	33.0969	0.777321	0	0	0	0	3.70682	0.711222	0.0449471	17.9048	9.09254	0	19.3352	7.50881	0	24.0494	0.467979	0	3.59577	0
GDF15	Gdf15	1 hr	0.0442248	0	0.469937	0.0290509	0.125087	0.990842	1.36092	0.717907	0	0.17865	0.417023	0.104272	0.365276	0.549113	0	0.184162	0	0.400617	0.242004	0.242458	0.966136	0.638211
GDI2	Gdi2	1 hr	0.300387	0.448478	0.373893	0.167626	1.22654	0.793755	0.39019	2.2851	1.02019	0.836555	0.943038	0.636402	1.71218	0.729938	1.11311	3.24574	1.32298	0.538147	0.123207	0.322866	0.5029	0.305804
GDPD3	Gdpd3	1 hr	26.9316	2.19706	0.544368	0.186736	1.63811	0.793627	1.93447	0	0.985782	2.09911	0.950352	6.99259	1.33466	1.79316	4.0415	12.7939	0.131299	2.78103	2.05868	1.88445	5.18942	0.972027
GEM	Gem	1 hr	0.464191	0.158114	0.169956	1.22262	0.382336	0.664209	0.0944779	0	0.423849	2.38108	3.9967	1.1068	0.695311	0.981738	4.06502	0.257927	1.24305	1.86965	0.341734	0.686722	2.25159	1.77036
GEMIN2	Gemin2	1 hr	0	0.0696785	0	0	0.474633	2.02723	1.98379	0	3.52655	1.39931	1.40832	0.339375	1.69196	2.31988	15.4473	0	0.138537	0	0	0	0	0
GEMIN5	Gemin5	1 hr	0.253825	1.75843	2.62833	0.215113	0.448849	0.6935	0.778903	0	2.15572	0.807157	1.00071	0.945215	1.16207	0.347943	0.297673	0.260521	2.49651	0.0839355	0.291252	1.18565	0.163101	0.676713
GET4	Get4	1 hr	0	0.0774192	0.532915	1.29884	1.80219	0.945483	3.24718	1.10909	0.816451	0.664786	0.656936	0.710302	0.528321	1.4419	1.30886	0.291637	0.497921	0.838081	1.4105	1.26602	0.787972	0.0944564
GFER	Gfer	1 hr	0.172897	0.136391	1.41486	0.292555	0.99631	1.10228	2.82592	0	1.96372	1.02039	0.915439	0.809724	1.67649	0.43934	2.8751	0	2.74556	0.567618	1.54263	1.14614	0.0859412	0.591195
GFM2	Gfm2	1 hr	0.64992	0.6179	0.941504	0.0613804	0.62391	0.348762	0.128718	0	1.07772	0.399611	0.407696	0.0855284	0.18845	0.11574	0.397058	0.303285	0.508064	0.48381	0.29153	0	0.146377	0
GFOD2	Gfod2	1 hr	0.20969	0.290127	0.186662	3.36459	1.54805	1.051	1.77653	3.31216	0.66706	0.878447	1.15096	0.525922	1.47918	1.30271	0.792173	0	0.954534	1.3113	2.50163	1.45509	1.24869	2.12682
GGA1	Gga1	1 hr	0.0919094	1.34631	1.10431	1.66896	0.702013	1.02793	1.9287	0.583201	0.717885	0.922303	0.76953	1.14294	0.685732	1.61743	0.777057	0.50238	0.19228	1.29257	0.952006	2.68358	0.418873	0.574332
GGACT	Ggact	1 hr	1.12449	0.50321	0.145389	0.872335	1.90498	0.0766198	0.206465	0	0.26707	0.184955	0.081644	0	0	0.471023	0.37305	0	0.0662573	0.0287324	0.127333	0	0.0780329	0
GGCT	Ggct	1 hr	0.942681	0.0224637	0.107297	0.751079	1.10283	0.916517	0.347526	0	1.59175	0.584319	0.783057	0.844105	0.496843	0.747908	0	0	0.201116	0.399853	0	0.107033	0.469887	0
GGH	Ggh	1 hr	0.952326	0.0127698	0	0.0441685	1.72933	0.475337	0.197556	0	0.370024	0.157144	0.225349	0.0621964	1.3557	0.10291	0	0	0.0633983	1.36652	0	0.169613	0.0332015	0
GHR	Ghr	1 hr	0.91799	0.788257	0.107743	3.03199	0.646335	0.340686	0.618098	2.21182	2.82374	0.659627	0.379091	2.27951	0.321453	0.421784	0.447939	0	0.330824	0.056046	0.372721	0.654359	0.720757	1.58589
GID8	Gid8	1 hr	0.760946	0.184339	0.0327966	1.07663	1.11153	1.47932	1.02138	0.607949	1.24958	1.25887	1.08318	0.832355	1.59887	1.62691	3.58137	0.460606	1.27979	1.83176	1.48627	1.10765	0.826781	0
GIGYF1	Gigyf1	1 hr	0.787341	3.56087	2.17886	2.50444	1.30235	1.55927	3.3444	0.775218	0.521868	1.54801	0.985659	2.95547	1.08741	2.35474	1.35867	0.329178	1.7706	1.22126	2.92172	3.85626	1.19681	2.76909
GIGYF2	Gigyf2	1 hr	0.0932713	2.82073	1.47238	2.38778	1.26734	1.52988	0.985846	0.934284	0.675241	1.06476	0.756907	1.09566	1.05528	1.2563	0.662276	0.929987	1.04443	0.835744	2.85189	2.52104	0.653813	1.4541
GIMAP1	Gimap1	1 hr	11.9126	0.174133	0.7489	1.43819	1.02862	0.428308	0.559866	0	2.37272	1.2581	0.824684	0	4.02209	1.76645	0	0	0.424902	0.513884	1.35177	3.58782	0.0561994	5.23464
GIMAP6	Gimap6	1 hr	0.468613	0.0194529	0.74334	0.041108	0.574962	0.290326	0.479991	0	1.06725	0.894375	0.732421	1.61845	1.69947	1.42869	0.297758	5.38901	1.27857	0.0291794	0.865104	0.154155	0.0652407	0
GINS2	Gins2	1 hr	6.03326	0	1.35473	0	0	4.11669	0	0	7.36173	2.36289	3.01925	0	17.4487	7.50875	0	0	6.71062	7.94457	2.74096	0	0.693116	0
GINS4	Gins4	1 hr	2.05422	0.458233	1.45522	0.1751	0.159639	0.30502	0	0	0.0538153	0.258835	0.266466	0.183735	1.13112	0.209036	0	0	0.063253	0.0961847	0.749398	1.5506	1.73675	0.227108
GIP	Gip	1 hr	11.3241	2.73144	5.11453	5.07701	0	0.384081	0	0	0	0.221516	0.0303692	0	0	0	0	63.9557	3.61036	0	0	0.723501	4.02838	4.16594
GIPC1	Gipc1	1 hr	0.449356	0.185935	1.35524	0.921364	0.838663	1.90807	0.822204	0.8143	0.815034	1.16124	1.13459	0.986221	2.02972	1.06892	2.16245	0.335286	0.634884	0.741132	2.35319	2.4011	0.897816	1.8257
GIPC2	Gipc2	1 hr	0.550001	0.0270033	0	0	2.68072	0.0998613	0.941295	0	0.419698	0.193354	0.255258	0.742336	0.513445	0.340216	0	2.11275	0.687948	0.0233095	0.0407597	0.0910725	0.287229	0.625407
GIT1	Git1	1 hr	3.07719	2.62215	1.39801	1.07894	0.767928	0.879902	1.77652	2.2804	0.918406	0.8389	0.917087	1.70479	0.84008	0.921111	4.15676	0.137504	0.834183	0.857285	1.8946	2.99928	1.94837	1.71256
GJB1	Gjb1	1 hr	1.6622	0.175448	0.0999043	0.283964	3.03059	0.563746	0.743131	0	0	0.597457	0.38067	0	0	0.0738209	0	1.52022	0.0568421	0	0.918332	0.0536432	1.28817	0.573835
GJB2	Gjb2	1 hr	0	0.35921	1.35236	0	2.7365	0	0	0	0.140661	0.392534	0.110049	0.35456	0.225911	0	0	0.971454	2.31026	0.261948	0.31426	0.156936	0.192586	0
GJB4	Gjb4	1 hr	12.4919	2.76337	0	0	0	0.124045	0	0	0	0.201013	0.129276	0	0	0	0	0	1.80463	0.505148	0.132265	1.2554	10.5416	6.4227
GK	Gk	1 hr	0	1.8938	0	0	3.47447	0.391532	0.414447	1.02315	0.279632	0.322089	0.496336	0	0.562057	0.633709	0.4526	1.72525	0.0133768	0.140398	0.0943352	0.195417	1.36873	0
GLDC	Gldc	1 hr	0.35971	0.698431	0.593217	1.39221	2.06212	1.00871	1.59213	0.769113	0.0936736	0.834261	0.257971	0.661397	0.965733	1.04389	0.177927	0.306662	0.48612	0.323206	0.748918	0.422827	2.30298	0.590009
GLE1	Gle1	1 hr	2.62999	0.0637037	0.49864	0.719503	1.17374	1.02864	0.808671	0	1.47063	1.05625	0.766589	0.520708	0.682961	0.959665	1.65567	0.790712	0.74729	0.67894	1.03373	1.47877	0.24588	2.00198
GLG1	Glg1	1 hr	0.131032	0.372305	0.497629	0.151659	1.17993	0.966386	0.463541	0.558186	0.59943	0.939352	0.811451	1.00404	0.607983	0.627193	0.821154	0.387604	0.409206	1.01404	0.483758	0.264724	0.774797	0.192729
GLIPR1	Glipr1	1 hr	0	0.0257299	0.188282	0.349321	0.869366	0.712263	0	0	0.326618	0.938686	1.03767	0	8.26413	1.00437	4.11284	18.6868	2.35867	0	1.12969	0.122595	0	0
GLIPR2	Glipr2	1 hr	0.681857	5.95572	6.15907	1.87962	0.256879	0.445615	0.649183	6.06384	0.574807	0.843938	1.14058	1.06535	1.16638	1.30632	2.40606	2.55933	2.18788	1.32803	3.14617	5.67347	0.382201	7.87038
GLIS1	Glis1	1 hr	2.02871	0.702065	2.61072	0.678535	0.993725	0.0481541	1.54356	0	0	0.162192	0.220743	0.446629	0	0.127171	0	0.724719	0.413469	0.0524223	0.0571283	1.00161	0.194586	0.537356
GLMN	Glmn	1 hr	0	1.37272	1.7523	0.750628	0.696904	0.450377	0.660251	0	2.25941	1.36318	1.19247	0.459414	1.92251	0.115481	0	0	1.65439	0.0918828	0.0888703	3.06025	3.27816	1.17088
GLMP	Glmp	1 hr	0	0.0976702	0.319334	0.0533737	1.1085	0.448956	1.05023	0	0.485446	0.760847	0.537912	0.740877	0.526293	0.513767	0.431346	0.359818	0.438427	1.21126	0.995038	0.304992	1.44	0
GLRX	Glrx	1 hr	0.0972099	0	0.0526237	0	0.888172	0.754244	0.58309	0	0.780472	0.194081	0.511346	0	0.33334	0.198565	0	1.64605	0.0475474	0.441125	0	1.28251	0.23283	0
GLS	Gls	1 hr	0	0.309547	0.11278	0.137797	1.91536	1.1002	0.92507	0.336602	0.22988	0.881914	1.35911	0.203147	1.03142	0.723098	1.10784	1.1876	0.355537	2.05976	0.356781	0.535753	0.592016	0.18662
GLTP	Gltp	1 hr	0.061804	0.171728	0.0135932	0.455736	0.716183	1.5432	0.420575	0	0.628552	0.864893	1.57636	0.214683	1.4891	0.839972	1.35996	1.85149	0.75796	2.2234	1.04849	0.274131	1.95172	0.102493
GLUD2	Glud1	1 hr	0	1.38117	0	0.108944	0.802555	0.717821	0.439408	0	0.774109	0.602824	0.348016	0	0.56772	0.0980498	0	0	0	0	0	0	0	0
GLYAT	Glyat	1 hr	0.172627	0.0215084	0	0.0179104	2.57845	0.042737	0.66928	0	0.0107142	0.13065	0.0304236	0.857259	0	0.138845	0	0.458354	0.311512	0.0127132	0.0127931	0.0915907	0.0398985	0
GLYCTK	Glyctk	1 hr	0.122382	1.3021	0.0274799	0.249769	3.68945	0.480473	0.904388	0	0.346908	0.752183	0.643755	5.0693	0.804587	1.28868	0.706916	2.15483	2.0546	0.968828	1.17642	0.120251	0.106298	0.248385
GLYR1	Glyr1	1 hr	0.182472	0.524989	2.09514	1.05199	1.53938	1.55291	1.33161	1.4982	0.89157	1.2347	1.35929	0.575434	1.53781	1.05773	1.22232	0.960703	1.06026	1.131	1.89073	0.949336	0.558258	0.937041
GM2A	Gm2a	1 hr	0.432303	1.84424	0.0847707	1.72104	0.901676	0.486818	0.255811	1.0257	1.14849	0.879325	0.843482	3.06197	1.85705	1.46386	0.849887	1.24267	0.174175	0.252949	0.219286	0.312234	0.713464	0.494723
GMFG	Gmfg	1 hr	0	0.124752	9.81726	0.249505	0.533805	1.19915	0.616124	0	0.9157	2.18614	1.16096	0	15.9479	6.25545	2.01641	4.39943	0.476945	0.573692	2.22857	1.42574	0.846959	0
GMNN	Gmnn	1 hr	2.35865	0.452084	0.0558128	4.20754	0.969654	1.29039	0.489292	0	1.68852	1.24649	0.678684	0.340458	3.24942	0.587895	1.07012	0.737473	1.06528	1.77261	0.0658591	0	0	0
GMPPA	Gmppa	1 hr	0.478463	1.81264	1.75477	0.0435847	2.1003	0.839732	1.26662	0	1.30827	1.25354	0.575076	1.41118	1.11819	0.316958	3.7139	1.06734	1.44362	0.366354	1.61167	1.47583	0.0319621	1.78625
GMPR	Gmpr	1 hr	0.121897	1.04041	2.2374	0	1.11995	1.47277	0.636831	0	8.09292	1.77984	0.76266	4.01563	0.882413	0.141915	0.639334	1.6297	0.075426	0.163542	0.667037	0.409481	0.403046	0.416809
GNA11	Gna11	1 hr	0.128002	1.5145	0.723122	2.65636	0.577213	0.718708	1.18604	0.977261	1.0364	0.90183	0.575921	1.74416	0.695311	0.959964	1.5192	0.359354	1.47761	1.64928	1.95481	2.47977	3.52744	2.12623
GNA12	Gna12	1 hr	0.97626	1.15123	0.267597	2.16585	1.12322	0.867085	1.81742	0	0.642024	1.58343	1.05599	2.6376	1.93441	1.04778	2.888	0.637074	2.33691	1.3275	1.68655	0.893206	2.80254	0.964665
GNA13	Gna13	1 hr	0.123806	0.605474	0.69599	0.914519	1.05587	0.83501	1.00906	2.39053	1.15394	0.993269	1.41082	0.105998	2.24815	1.29596	1.40858	0.428154	1.95727	1.55051	1.54545	0.941455	1.68362	0.16242
GNAI1	Gnai1	1 hr	0	0.270821	0.162372	0.157161	0.681543	1.59417	0.564905	1.62302	0.345307	1.18043	1.51866	0.693174	1.19657	0.260679	0.242534	0.359916	0.0354054	1.75273	0.856011	1.14149	1.26366	0.399881
GNAI2	Gnai2	1 hr	0.0517848	1.05436	1.13775	1.91035	1.07294	1.21016	1.29218	0.946331	0.822792	2.12779	1.33818	1.27376	3.98374	1.79006	2.0595	0.543295	3.54514	4.5736	2.60743	1.76186	4.93827	1.79371
GNAS	Gnas	1 hr	0.372995	0.372468	0.482072	0.553525	0.511151	1.01899	0.637031	0.56875	1.49309	0.897282	1.01431	0.772278	1.37021	0.815362	1.23797	0.730533	1.09419	1.1415	0.615111	0.67542	1.33413	0.47721
GNB2	Gnb2	1 hr	0.570004	0.261328	1.68577	0.994292	0.621097	1.13577	1.22665	1.00807	0.769781	1.10262	1.44289	0.728158	1.30883	1.28085	1.73022	3.19975	1.67263	1.13068	1.00044	0.968993	0.87981	0.783491
GNB4	Gnb4	1 hr	4.14998	6.53167	4.79839	8.64369	0.77552	0.721432	0.462147	4.1147	0.752302	1.54819	1.70319	3.55177	2.90181	1.56933	7.36167	1.24117	9.45501	1.36348	5.29906	4.32794	9.61455	11.6516
GNB5	Gnb5	1 hr	0.769971	2.26463	0.185872	0.714716	0.708995	1.21275	1.15283	1.08548	0.332673	1.09897	0.629219	1.14024	0.377466	1.59103	0.733271	0.232136	1.13894	1.95681	2.0065	2.10745	0.586715	2.38062
GNE	Gne	1 hr	0.0690921	1.6494	0.820696	2.07063	0.683424	1.46704	0.586067	0	0.950472	0.915926	1.20962	0.162903	0.785745	1.37455	0.995655	3.00905	1.21813	0.971949	1.06779	1.22461	0.876213	1.24558
GNG11	Gng11	1 hr	0.152576	0.0664446	0.207164	0.0402695	0.310522	0.553258	0.16242	0	2.16247	1.03895	1.18101	1.30384	2.29156	0.353476	0	0	1.47409	3.70099	0.710308	0.836486	0.504487	0
GNG12	Gng12	1 hr	0	0.482581	0.317358	0.243787	1.17725	0.840951	0.879394	0	0.283942	0.751224	0.826222	0.145537	0.953108	0.684251	1.48472	1.0724	0.945726	1.96994	0.468958	0.941233	0.617028	1.03866
GNG4	Gng4	1 hr	0	0.177632	0	1.39447	1.67723	0	0	12.0765	0.438641	0.525644	0.694817	0	0	0	7.83392	11.8179	0.679108	1.45851	0	0	4.77189	4.38641
GNG5	Gng5	1 hr	0.0826411	0.0178127	0.0491969	0.181156	0.615567	0.865187	0.633864	0	3.33206	0.648284	1.07567	0.194849	1.48197	0.439137	2.7131	0	0.0681001	2.34497	0.141774	0.453072	3.29122	0.282579
GNGT2	Gngt2	1 hr	0	4.92563	4.72255	1.26504	0.310549	0.181929	0.614329	0	0.968879	0.353704	0.460323	0.35032	1.35643	0.137082	0	0	4.57023	0.269086	0	0.184468	6.71192	0
GNL1	Gnl1	1 hr	24.4563	4.68216	3.93321	6.88805	0.0527432	2.38421	0.216714	0	1.55754	3.21805	2.0549	0	0	3.43154	0	0	3.10144	0	4.72335	4.97645	3.61919	3.06033
GNL3	Gnl3	1 hr	0.181768	0.963113	0.984362	0.930089	1.21912	1.45994	1.53997	0	2.1562	1.47751	1.57134	2.34514	1.46583	1.27964	0.596357	1.0746	0.878668	0.787048	1.20964	1.04866	0.539233	0.790636
GNPDA2	Gnpda2	1 hr	0.2273	0.0283291	0.0499926	0.0979855	2.9449	0.707229	0	0	1.64542	1.14516	1.07317	0	0	0.303622	0	1.05618	1.61143	0.304955	2.40231	0	0	0
GNPTG	Gnptg	1 hr	0.111497	0.29697	0.513026	0.846949	1.87321	1.5909	3.01295	3.26349	0.785431	1.2552	0.876257	2.00418	0.462764	1.11284	0.494549	0.366983	0.14307	2.31509	1.83286	1.43954	1.6413	4.78614
GNS	Gns	1 hr	0.876097	0.0546867	0.0300137	0.127238	1.29632	1.43742	0.402566	0.560859	0.3868	0.844052	1.05729	0.447868	0.857327	0.526511	1.10943	0.530657	0.305324	1.92606	0.366478	0.233967	0.33602	0.0192982
GOLGA1	Golga1	1 hr	0.0911558	0.707543	0.369311	0.65447	1.31588	1.38111	1.21466	1.63264	1.26391	1.37775	1.1029	1.18549	1.16402	1.49414	0.535244	0.753786	0.695909	0.526446	1.67154	2.16389	0.265596	1.0864
GOLPH3L	Golph3l	1 hr	0.790612	0.0131588	0.143354	0	1.17438	1.94162	0.634873	0	1.83774	1.21402	1.12903	0.248934	1.30922	1.38462	2.28251	0.842318	0.0178031	0.737512	0.249088	0.0337485	2.67851	0
GORASP1	Gorasp1	1 hr	3.46787	0.865441	1.99276	0.271229	0.569527	0.733217	0.928131	1.45226	0.481663	0.788087	0.580036	0.413779	0.282167	0.906562	0.502682	2.01152	0.295426	0.555779	0.440419	1.28564	0.280395	1.30354
GORASP2	Gorasp2	1 hr	0.194564	0.125841	0.144771	0.773237	0.896527	0.782866	0.744925	4.03235	1.73371	0.823277	0.769204	0.0753073	0.742702	0.431515	1.02574	1.3845	0.310941	0.25086	0.026337	0.188556	0.274398	0.191931
GOSR2	Gosr2	1 hr	0.408993	0	0.121791	1.22179	1.52547	1.00265	1.15913	1.504	0.832942	1.16411	1.09556	0.343147	0.989006	0.78496	2.2299	0.376728	0.0389122	1.77881	0.690657	0.789322	0.0492288	1.47714
GOT1	Got1	1 hr	0.0301176	0.0131157	0.213473	0.171741	0.952944	1.4165	1.08896	0.332354	2.52948	0.423546	0.644217	0.0710104	0.409856	0.67694	0	0.154209	0.00746316	0.117026	0.191172	0.165117	0.987964	0.160303
GOT2	Got2	1 hr	0	0.0450267	0.00956122	0.0869034	0.883079	1.33201	0.44997	0.566817	4.7248	0.558034	0.555033	0.348836	0.372628	0.630188	0.956048	0.201638	0.220946	1.06181	0.246665	0.0418396	0.436073	0.18196
GPA33	Gpa33	1 hr	1.29343	2.13321	3.22289	0	0	0.242026	0	0	1.73021	0.162101	0.0585366	5.57899	0	0	0	12.9062	12.1914	0.539212	0	0	20.3437	0
GPAA1	Gpaa1	1 hr	0	0.0711423	0.134994	0.0669213	0.819863	1.45362	0.77443	0.84964	0.747033	0.789242	1.04618	1.57196	1.79851	0.749642	0.509354	0.192399	0.0980797	2.01439	1.00919	0.346963	1.86804	0.178969
GPANK1	Gpank1	1 hr	0.197955	2.51363	1.85213	0.433934	0	2.74293	0	0	2.6962	1.97665	1.70729	0	0	2.37169	0	0	1.09659	0	6.9653	6.74557	6.25127	2.85671
GPAT4	Gpat4	1 hr	5.84026	0.70313	0.535011	0.373502	2.28964	0.743671	1.34731	0.480592	1.06784	1.1899	0.994949	0.318427	0.982437	0.80186	0.611558	1.39845	0.156427	0.729356	1.08548	1.19121	0.150362	1.09504
GPATCH4	Gpatch4	1 hr	0.639126	2.09099	1.0173	3.10863	0.935212	1.58619	1.07061	0.986813	1.50657	1.6937	0.649275	0.999223	1.31787	0.925617	0.165933	0.685396	0.407348	1.63054	3.12322	3.16109	0.0961652	3.22271
GPATCH8	Gpatch8	1 hr	0.393308	0.892699	0.587573	0.79082	0.863682	1.07474	1.30352	0.227035	1.20439	1.18564	1.02575	1.11217	0.980655	1.49124	1.04765	0.209071	1.17102	0.328115	0.997655	1.07583	0.595365	0.998824
GPC4	Gpc4	1 hr	0	0.346702	0.273124	0.100372	2.05213	2.02756	1.14865	1.38184	1.17917	1.03497	3.05012	0.28986	2.55455	0.720327	0.806574	0.162522	0.0865043	1.22638	0.698284	0.129478	0.403844	0.421264
GPCPD1	Gpcpd1	1 hr	0	0.846612	0.333588	0.561559	0.818638	0.681402	0.725752	0.525755	0.832207	1.55001	2.19907	0.404776	1.65013	1.57284	2.28317	0.462397	0.171127	0	0.528803	1.02748	0.23604	0.139388
GPD1	Gpd1	1 hr	0.512408	0.0177432	0.477746	0.722687	1.95828	0.0484144	0.227297	0.913047	3.2067	0.0382566	0.014742	3.59935	0.0108504	0.383786	0	0.247876	0.196626	0.0498985	0.0267466	0.149102	0.435631	0.0373002
GPD2	Gpd2	1 hr	0.229529	0.100787	0.0768139	0.0149314	0.331644	1.00522	0.109082	0	2.25481	0.973031	1.2666	0.780831	2.0398	0.649932	0.296721	3.56737	0.106013	1.02504	0.552131	0.640558	2.25307	0.407296
GPI	Gpi1	1 hr	1.16409	0.430017	0.430699	0.88444	0.531919	1.68396	0.343177	0.347094	2.06714	0.886484	0.725455	0.273125	0.437512	1.01965	0.204072	0.0771077	1.27392	0.23344	0.677375	0.93505	0.544353	0.766917
GPIHBP1	Gpihbp1	1 hr	7.49588	0.650607	9.4453	8.5547	2.46921	0.594644	1.22328	3.01991	3.7203	0.906043	1.10552	1.09659	1.1807	0.23518	0.987411	0	4.78393	0.768711	12.0082	5.20451	1.3558	2.53273
GPM6A	Gpm6a	1 hr	0.664913	0.0713694	0	0.35925	0.420767	0.0273943	0.174459	2.11369	0	0.185993	0.458495	0	0.0790591	0.641844	8.1724	1.42811	0.307105	2.18578	0.281152	0.0523857	0.0317198	0
GPR108	Gpr108	1 hr	0.263951	2.14594	3.00224	1.51244	1.79815	1.65807	3.08845	0	0.423786	1.006	0.753151	0.43126	0.952058	0.932152	0.707568	0.490014	1.47848	1.10405	1.24975	0.677229	1.40226	1.65807
GPR137	Gpr137	1 hr	0	3.94996	0.393141	1.24178	1.33632	0.90295	1.03728	2.4744	0.60815	1.00643	1.22636	1.90089	0.439853	0.847745	2.3689	0	0.451699	2.03298	1.48763	1.01045	7.12928	0.252781
GPR137B	Gpr137b	1 hr	0.113258	0.150715	0.0912765	0.0289798	2.20522	0.231937	0.787186	1.50764	0.172104	0.647413	0.971414	0.158502	0.954263	0.614884	0.490882	3.65352	0.53238	0.60897	0.1586	0.225826	0.389256	0
GPR146	Gpr146	1 hr	0	0.168656	8.51313	0.23389	0.460621	0.218775	0.577566	0	2.28242	0.533015	0.494033	2.54097	0.516309	2.50676	0	8.28719	0.60541	0.145585	0.140811	0.89817	0	25.0748
GPR157	Gpr157	1 hr	0	3.86196	10.7231	7.47088	2.10992	0.944705	3.63904	0	9.01205	1.04954	0.748293	0.498862	1.79301	1.25438	2.86303	0	0.677199	1.82314	0.385594	2.02437	5.52966	1.36283
GPR4	Gpr4	1 hr	0.983952	0.223928	0.0624335	0.976044	0.680109	0.132775	0	0	0.750035	1.52837	1.2724	0	1.59372	0.0957314	0	2.47362	0.0961476	0.199371	2.05573	0.2976	0.206863	1.51089
GPR65	Gpr65	1 hr	0	0.667134	0.0823623	2.13538	0	0.43048	0	9.4184	0	0.322311	0.261912	1.30077	3.43011	1.98987	1.78177	18.0763	2.37094	0	0.642426	0.222378	0.976267	2.69599
GPRASP1	Gprasp1	1 hr	1.01214	1.32535	0.385896	1.05768	1.03926	0.815459	1.18628	0	0.835274	1.13717	0.88738	1.04477	0.560997	2.46025	2.10775	1.11215	0.666511	1.18064	1.31234	1.11309	0.111219	1.86613
GPRC5C	Gprc5c	1 hr	0.7802	0.166099	0.0674005	0.49757	1.42946	1.94209	1.79485	0.547793	0.884722	0.98757	0.94579	0.232481	1.15316	0.381621	0.260358	0.144263	0.208388	0.586078	1.38011	0.77758	0.744972	1.17936
GPS1	Gps1	1 hr	0.897943	0.046812	0.215027	0.414373	0.747027	0.591257	1.29348	0.426548	1.2793	0.513314	0.451668	0.754617	0.306686	1.01746	0.517089	0.458719	0.166366	0.637375	0.689119	0.993377	0.10603	0.284224
GPS2	Gps2	1 hr	0.113685	3.43431	1.4825	1.61526	1.59783	1.70327	1.76807	1.11726	1.75882	1.32568	0.918644	3.0595	0.81461	1.19008	0.349471	0.461634	1.91599	1.64967	2.19242	2.65158	1.73256	1.87672
GPSM3	Gpsm3	1 hr	0.756917	4.58959	3.67655	14.4354	0	1.29315	0	0	0.635705	3.09025	2.39526	0	0	8.93808	0	0	8.73584	0	2.4585	6.02899	1.48551	6.48353
GPT2	Gpt2	1 hr	0.352461	0.398622	1.60502	0.835039	1.92869	0.115797	0.64813	1.36245	3.62293	0.282333	0.0953248	1.49414	0.0633366	0.139272	0	0.769242	0.162156	0.35064	1.18095	0.184006	0.257628	0.303789
GPX1	Gpx1	1 hr	0.235251	0.025251	0.349264	0	0.797831	1.11411	0.947722	0.849693	1.00562	1.04703	1.37367	3.25849	2.18664	0.719952	1.24096	0.505276	1.23611	0.853179	1.38702	0.0344332	2.30924	0
GPX2	Gpx2	1 hr	0	1.06746	0	0	2.23611	0.545635	0	0	0.720238	0.400794	0.52381	3.19048	0	0.321429	0	0	1.11508	0	0	1.41865	1.98016	0
GPX3	Gpx3	1 hr	0.000897565	0.039233	0.0303015	0.0282232	1.25394	0.0532564	0.136629	0.17779	0.0122792	0.0339219	0.0539444	0.181563	0.0277895	0.0473445	0.0194597	0.181563	0.0884554	0.0771536	0.0064445	0.046748	0.115136	0.00278806
GPX4	Gpx4	1 hr	0.0631672	0.341993	0.479755	0.0238593	0.877015	0.636763	0.92617	1.2485	1.4644	0.417768	0.481111	0.937294	0.708293	0.773503	0.143172	0.774476	1.92038	0.933639	0.260361	0.765156	0.477457	0.464817
GPX8	Gpx8	1 hr	0	0.208342	0.475549	0.387252	0.180681	0.282468	0.0989251	0	0.217063	0.805844	0.601317	0	0.293096	0.429357	0.323755	0	1.6384	1.03544	0.0241181	0.0974262	0.185314	0
GRAMD1A	Gramd1a	1 hr	2.01532	1.78074	0.689251	2.07526	0.782736	1.19832	1.56118	2.98973	1.02571	1.48426	1.14851	0.944323	1.76936	2.76838	2.04857	0.208062	0.790124	0.707185	1.84569	2.39838	3.0626	2.18149
GRAMD4	Gramd4	1 hr	0.0407194	1.37747	1.94725	0.753965	0.855406	1.31765	1.80646	0.5967	0.574251	1.0596	0.885318	0.507798	1.01601	1.27162	0.436629	0.528397	1.32899	0.827463	2.27533	1.91512	1.67678	1.04593
GRASP	Grasp	1 hr	0	0.97586	0.6289	0.0331297	0.477901	0.397218	2.77872	2.67832	0.431136	1.25746	0.842778	0.459871	1.29138	0.649184	0.267742	0	0.3713	2.55527	1.24462	0.509453	0.153253	1.82585
GRB2	Grb2	1 hr	0	0.431633	1.12778	0.949992	1.21665	1.2777	1.04604	0	0.956322	1.34639	1.11627	1.6572	2.53577	1.5803	1.19282	2.48124	1.50753	0.523941	2.30156	0.856787	1.15559	0.612809
GRB7	Grb7	1 hr	2.4085	1.02821	0.900034	1.78383	1.51965	1.23823	2.15374	1.57878	0	0.809786	0.815926	0.641992	1.01316	1.0595	0.927621	0.293703	1.01131	4.34793	1.3273	1.7697	1.04714	1.68568
GREB1L	Greb1l	1 hr	20.825	0.164899	0.643048	0.777164	0.118074	0.182097	0.257465	2.00054	0.703386	0.0383704	0.24771	0.116195	0.149146	0.083967	0	0.338469	0.273001	1.23262	0.312817	0.557997	0.12848	0
GREM2	Grem2	1 hr	0	2.64725	0.799949	6.06124	0	0.0977767	0.330167	0	2.55129	0.336534	0.47433	0	0.149621	0.788125	1.76953	6.21814	5.76155	1.20515	0.731733	0.099141	3.60728	6.18676
GRINA	Grina	1 hr	0.155786	0.357392	0.0634618	0.023018	1.33093	0.803609	0.736251	2.3114	0.570724	0.548788	0.525012	0.537532	0.413458	0.372148	0.150735	1.01167	0.020276	1.01496	0.645298	0.494707	0.56376	0.534284
GRIPAP1	Gripap1	1 hr	0	1.41443	0.2173	0.315807	0.973577	1.08876	1.01793	2.97507	0.440896	1.01622	0.700149	0.90427	0.733269	1.0755	0.560095	0.414883	0.567446	0.368949	1.0123	1.0653	0.781071	0.810962
GRK6	Grk6	1 hr	1.14851	1.01508	1.45103	1.09197	1.08654	1.14051	1.36831	1.35516	0.888705	1.45469	0.981047	1.03501	2.12562	4.18413	1.47665	2.77039	0.388215	2.38597	2.21213	2.33092	0.622256	1.66717
GRN	Grn	1 hr	0.0342404	0.0955094	0.0185357	0.0133505	0.856426	1.14835	0.437347	1.05937	0.317252	1.27399	0.855711	1.17356	1.70931	0.610098	0.619485	0.20422	0.685046	0.954767	0.744586	0.512264	0.515602	0.183956
GRTP1	Grtp1	1 hr	0	1.73934	0	0.0878486	4.34492	1.06733	3.62809	6.06962	1.13098	1.30428	0.84502	2.28078	2.16335	0.391135	0	3.11265	0.488546	3.28058	0.624203	1.82122	0.673805	4.425
GRWD1	Grwd1	1 hr	0.797101	0.0872388	0.0141163	0.220685	0.810465	0.895163	0.436759	0	0.974308	0.708263	0.641446	0.969697	0.464615	0.512705	0.805195	0	0.508282	1.11698	0.24713	0.215603	0.212215	0.580934
GSDMC	Gsdmc2	1 hr	1.588	1.37164	0.0799317	1.58544	0.133482	0.0423284	0	0	0.402021	0.0529597	0.0880037	0.180142	0.234283	0.112416	0	0	0.0454784	0.0626066	0.230345	0.042919	0.139979	0
GSDMD	Gsdmd	1 hr	2.20084	1.72437	1.33421	0.315888	0	1.95248	0	0	0.462797	1.00465	2.09477	0	0	2.69756	0	0	0.622223	0	3.44397	1.00382	5.08401	1.41557
GSE1	Gse1	1 hr	0.472593	1.20857	0.324917	1.56719	0.479399	0.690344	0.900671	0.455534	0.517151	0.872956	0.68819	1.17526	0.585877	0.960608	0.5682	1.00922	0.85403	0.711381	1.03608	1.44291	0.672724	1.00471
GSK3A	Gsk3a	1 hr	0.125279	1.26663	0.0281305	0.368313	1.1769	1.53813	0.925797	0	1.70876	1.18486	0.886763	1.02633	0.983912	1.77222	2.94803	1.44501	2.42696	0.932884	1.37011	2.81119	1.53813	0.254264
GSR	Gsr	1 hr	0.0582323	0.9715	0.367284	0.0757678	1.1798	1.00941	0.958577	1.4031	0.528347	0.959388	0.777038	0.386847	1.04935	0.743792	0.306315	0.738622	0.768676	0.134304	0.932476	0.427087	2.81745	0.248843
GSTK1	Gstk1	1 hr	1.3215	1.14302	1.2305	0.728873	1.3408	1.16211	1.54266	0.920862	1.0592	1.00023	0.802482	1.1692	0.908089	1.42778	0.622268	0.242581	1.06692	0.60434	1.10666	1.06692	0.15264	0.968759
GSTM3	Gstm5	1 hr	1.71795	0.00792441	0.130454	0.902598	0.254217	0.778424	0.257618	0	0.141481	0.557064	0.362617	0.317911	0.464849	0.257394	0.934183	1.51468	0.696115	0.740521	0.227453	0.536879	0.124623	0.183532
GSTO1	Gsto1	1 hr	0.300812	1.13961	0.039276	0.514242	1.13581	1.68278	0.459743	0	1.63513	1.3395	1.12287	1.16199	2.29232	1.31392	0	1.87992	1.83045	2.67869	1.84597	0.569198	0.892388	0
GSTP1	Gstp1	1 hr	0.0454309	0.0267394	0.139437	0.270999	0.523884	0.79272	0.438156	0.518259	0.473318	0.484972	0.891658	1.47811	0.718559	0.432878	0.650513	0.0819199	0.598852	1.15487	0.318594	0.564959	2.3143	0.35465
GTF2B	Gtf2b	1 hr	0.651857	0.128486	0.483729	0	0.562872	0.625244	0.100627	0	0.891226	0.280951	0.619146	0.328354	0.0808064	0.110052	0.654213	0	0.0584911	0.538617	0.600018	0.232855	0.246439	0
GTF2F1	Gtf2f1	1 hr	0.209956	3.19288	2.54055	3.73247	1.26528	1.82317	1.39829	1.39683	0.836484	1.90571	0.853331	2.26623	1.53264	2.05606	0.590486	0.25922	2.99427	1.73119	2.9476	3.43017	1.49767	3.63117
GTF2F2	Gtf2f2	1 hr	0.329462	0.0413918	0.182012	0.121527	0.742823	0.810973	0.571541	0	3.20208	0.616975	1.23297	0	0.573493	0.622968	2.89715	0	0.830902	0.726656	0.22424	1.27548	0.383536	0.5059
GTF2H4	Gtf2h4	1 hr	0.787123	3.84942	0.115494	0.127442	0	1.20927	0	0	1.34326	1.30173	1.50171	0	0.848853	2.36478	0	0	1.87436	0.4304	1.40499	6.20197	3.34734	6.37408
GTF2I	Gtf2i	1 hr	0.0371586	0.266354	1.19754	0.176673	1.36029	1.30341	0.701143	0.722656	1.11092	1.02797	1.25595	0.331682	1.66159	0.813296	0.29127	0.124526	0.700466	2.33464	0.582521	0.145212	0.792366	0.401185
GTF2IRD1	Gtf2ird1	1 hr	0.59782	0.897948	0.29891	0.377233	0.714742	1.06401	1.30694	0.760134	1.12833	0.754044	0.770018	0.917482	0.576741	1.31917	0	0.911392	0.652721	0.244243	1.23953	0.881787	2.14549	0.938843
GTF3A	Gtf3a	1 hr	1.75405	0.228854	0.0607683	0.172726	0.76619	1.02094	0.533295	17.6622	6.43306	0.803908	0.934425	0.354582	1.55064	0.815433	1.49361	0	4.62034	0.0475969	2.44181	0	0.783552	0.169283
GTF3C1	Gtf3c1	1 hr	0.534724	2.38391	2.46846	1.47676	1.37676	1.22682	1.53031	0.597104	0.86997	1.08752	1.12235	1.52168	1.39399	1.46775	0.537957	0.432724	1.24794	0.884775	1.86205	2.74074	1.49974	2.79584
GTF3C2	Gtf3c2	1 hr	1.5787	1.35897	1.04849	0.488839	0.665747	0.795047	0.815911	1.65061	0.424892	0.639575	0.695926	1.06577	0.640616	0.605495	0.412508	1.10292	0.659191	0.546959	1.42094	1.62818	3.08695	0.512097
GTPBP2	Gtpbp2	1 hr	1.69793	1.50402	1.40676	5.2672	0.827446	1.21414	2.71413	1.25762	0.692355	1.22181	1.25628	1.31123	1.06769	1.35074	1.45181	0.319092	1.36563	1.10865	1.08464	3.0438	0.443886	2.09962
GTPBP6	Gtpbp6	1 hr	0.223907	8.1344	5.49194	6.28117	0	2.96246	0	0	2.64971	2.40779	1.98853	0	0	6.30859	0	0	4.75167	0	8.55819	10.1474	9.09133	8.108
GUCA2A	Guca2a	1 hr	136.993	6.62143	82.6286	20.3	0	0	0	0	0	0	0.185714	0	6.7	7.43571	0	0	0.464286	3.42143	0	2.89286	0	0
GUCD1	Gucd1	1 hr	0.569444	0.12667	0.422933	0.294721	1.14146	0.693743	1.14146	3.25644	1.7145	0.706469	0.831045	1.08225	0.306538	0.485181	0.634459	4.84746	1.07561	0.826697	0.28488	0.599125	1.10996	0.143468
GUK1	Guk1	1 hr	0.664743	1.25794	1.16715	0.357188	1.24526	1.66836	1.32434	1.2512	0.79142	0.992302	1.06877	1.47475	1.47759	1.20245	0.397905	2.42207	3.93599	2.01055	0.902883	1.54487	1.70606	2.93286
GYS1	Gys1	1 hr	0.645979	1.09975	1.94643	0.443901	1.18392	1.09258	1.91297	0.414851	6.24118	1.03167	0.745475	0.972249	0.905771	1.09947	0.501393	1.2219	1.06331	0.287408	1.90393	0.545932	0.395669	1.42717
GZMA	Gzma	1 hr	11.4511	14.8878	3.87066	2.59306	0	1.29788	0	0	0	0.382605	0.450203	0	0.444795	0.512393	0	0	0.759802	1.23704	0	1.52636	0	0
GZMB	Gzmb	1 hr	0	1.74467	6.56838	11.6688	0	1.37014	0	0	0.973024	0.442284	0.583438	0	0	2.18695	0	12.0734	6.20138	2.84755	7.02384	11.4711	1.87829	0
H6PD	H6pd	1 hr	0.306106	3.29399	6.1513	2.48037	0.915101	1.25734	0.983178	0.899633	1.16577	1.72453	1.04079	2.2296	1.54194	1.52601	1.58385	1.53462	3.57159	1.12606	1.42326	2.29648	5.25261	2.585
HAAO	Haao	1 hr	0.0651758	0.0202599	0.461965	0.0609709	1.27408	0.263953	0.706231	0	0.279052	0.36917	0.337443	0.729453	0.170203	0.411124	0	0.302848	1.2673	0.0303899	0.413704	0.432053	0.262997	1.30008
HABP2	Habp2	1 hr	1.50517	2.45763	2.0489	1.1573	0.110988	0.879527	0.372013	0	2.02488	0.225302	0.211628	0.0509978	0.541636	0.0577729	0.479305	2.07219	0.734417	0.112712	0.749569	0.460581	0.722099	0.13932
HACD1	Hacd1	1 hr	11.8318	0	2.39565	0	1.1167	1.65399	0.764837	0	11.7296	0.899684	0.858598	0	0.3466	1.22416	0	0	0.243357	10.5718	0	0	0.139061	0
HACD3	Hacd3	1 hr	0.0262338	0.00815479	0.158018	0.0902027	0.809555	1.02089	0.116167	0	0.288726	0.781359	0.716352	0.0618533	0.85633	0.472208	0.418894	0.0762396	0.253452	1.47075	0.298688	0.11636	0.305112	0.139631
HACL1	Hacl1	1 hr	1.54617	0.405554	0.362278	0.110341	1.52225	1.23956	0.306221	1.4009	1.12176	0.822496	1.32599	1.1911	0.0900949	0.789343	0.363923	4.06174	0.416942	0.0855395	0.203599	0.0275852	1.48897	0
HADH	Hadh	1 hr	0.376983	0.048794	0.0327399	0.0335821	0.856712	0.497415	0.531155	0.582739	2.70662	0.266551	0.502363	0.306766	0.174911	0.114537	0.52526	0.104326	0.313819	0.351191	0.465675	0.196808	0.241549	0.122748
HADHA	Hadha	1 hr	0.0222798	0.315699	0.55558	0.169552	1.13784	1.05091	0.570007	1.40099	2.23339	0.897979	0.747489	0.993633	0.874381	0.56163	0.217039	0.171607	0.695638	0.384148	0.214169	0.118186	0.213665	0.0952079
HADHB	Hadhb	1 hr	0.0437894	0.179693	0.0497728	0.0112046	0.890042	1.23788	0.403861	0.463238	3.59687	0.772736	1.00113	0.496509	0.67159	0.443496	0	0.85517	0.554094	0.528179	0.208886	0.232286	0.750518	0.0888746
HAGHL	Haghl	1 hr	1.84892	0.341141	0.415162	0	3.78473	1.17146	13.6633	82.2567	0	1.51421	0.201144	2.58752	2.07098	5.07045	0	5.09941	3.2521	4.9047	6.00536	4.86769	0.545503	11.8707
HAO2	Hao2	1 hr	0.198913	0.0227547	0.0743969	0.0189482	2.69343	0.0357393	0.269462	0	0.0287606	0.00854359	0.0210629	0.359719	0	0.195445	0.100493	1.73536	0.228435	0.0202593	0.022078	0.41889	0	0.098632
HAPLN1	Hapln1	1 hr	0	0.927905	0.340308	1.97832	0	0	4.25838	0	0	0.421981	1.08218	5.37459	5.34963	0.680615	0	0	5.47895	0	0.401563	0.91883	0.299471	0
HAT1	Hat1	1 hr	0.167346	0.0308768	0.812846	0.341538	0.639674	1.36775	0.439849	2.22764	2.80105	0.752112	1.25706	0	1.39368	0.552432	1.17609	0	0.033644	1.03772	1.45281	0.440577	0.198077	0.164725
HAUS4	Haus4	1 hr	0	0.127044	0	0	2.20697	1.00566	0.23431	0	0.77937	1.11649	1.176	0.727163	0.631301	1.62146	3.92572	2.69252	0.100139	2.28305	0.664977	1.50154	0.0604039	2.424
HAUS7	Haus7	1 hr	0	0.275407	0.896434	0.193208	0.908321	0.45955	0.467508	1.33775	0.406463	0.906104	0.480704	0.041704	0.249015	0.916682	1.14243	0.252541	0.0766588	0.672099	1.64338	0.997672	0.0500649	1.89088
HAVCR1	Timd2	1 hr	0	0.367482	0.305172	0.280236	1.02069	1.4246	1.48944	0	0	0.270451	3.22073	0.149556	1.99928	0.544879	0	0.35997	0.00726	0.479728	0.595194	0.815961	0.546015	0
HAX1	Hax1	1 hr	3.53411	0.972493	0	0.179491	0.98618	1.39643	0.958806	1.05606	4.48439	0.934073	1.07034	0.813052	0.539433	0.807049	2.68816	0.237961	0.119821	0.625997	0.448067	0.275059	0.213468	1.18164
HBEGF	Hbegf	1 hr	0.779123	1.89156	0.38421	0.620765	0.208159	0.654184	0.158577	0	1.91559	0.33157	0.682579	3.04703	0.22061	0.655276	0	1.13232	0.0251189	0.848801	0.177143	3.31111	2.40683	0
HBP1	Hbp1	1 hr	0.348207	0.152814	0.0746734	0.0145153	1.33219	1.14647	0.898903	0	1.94643	0.969625	1.42984	0	0.771652	0.579808	0.710768	1.08655	0.969625	1.93054	0.536745	0.798667	0.318451	0.0912048
HCFC1R1	Hcfc1r1	1 hr	0	0	0.159292	0.403391	0.604312	0.663487	0.798352	0	8.07401	0.741585	0.644565	1.46304	0.387565	0.374319	6.77817	0	0.0290717	0.116287	1.71592	0.77771	0.900533	2.11501
HCK	Hck	1 hr	0.276151	0.619112	0.0607369	2.2497	0.321906	0.74585	0.532461	3.04737	0.242543	0.790795	1.56944	7.93062	3.22311	3.95519	3.14982	1.78486	1.95775	1.57349	3.58226	2.79471	0.287893	4.48927
HCLS1	Hcls1	1 hr	0.303002	0.660122	0.548913	0.448528	0.576561	0.684949	0.917471	2.06044	0.17066	1.98298	0.753787	0.764252	1.87521	1.4966	0.214313	1.87116	3.01895	1.04535	1.89347	1.15625	0.565225	0.831141
HDAC1	Hdac1	1 hr	0.574824	1.16027	1.43606	2.20295	0.816484	1.47013	0.45403	1.90078	0.438779	0.916398	0.950463	0.799951	0.649582	1.19932	1.2393	0	1.12905	1.06328	1.78063	2.81825	1.06178	2.33607
HDAC11	Hdac11	1 hr	0	0.44825	2.73633	1.05002	1.96094	1.25841	1.0978	0	3.12095	1.44291	0.948302	0.0979289	0.532932	1.05735	1.2331	3.80172	0.893661	1.12689	1.024	2.69659	0.321699	1.16143
HDAC3	Hdac3	1 hr	0.122751	1.73934	0.774215	1.08018	0.975595	1.1665	1.1321	1.06768	1.41756	1.21404	0.868869	0.62262	1.18915	0.701356	3.65079	0	0.70392	0.128947	0.124994	0.0432672	0.240907	0.788104
HDAC4	Hdac4	1 hr	0.188301	1.21205	0.497543	1.17258	0.574762	0.68098	0.688894	0.493521	0.934957	0.733274	0.637783	1.30885	0.664075	0.984833	1.26763	0.294729	1.2463	1.16446	1.02269	1.71787	1.01128	0.86184
HDAC5	Hdac5	1 hr	0.148468	1.94946	0.585915	1.51988	1.06418	1.0155	1.05556	2.79182	1.79388	1.84986	1.04283	2.22767	0.873489	1.75325	2.98218	0.20632	1.37777	0.698342	1.68674	2.56318	2.32044	2.13799
HDAC6	Hdac6	1 hr	0.0760179	0.761168	1.19271	0.328687	1.32318	0.619956	1.03936	0.537675	0.495778	0.660589	0.528361	2.17394	0.766058	0.605725	0.416683	1.47692	0.132832	0.657704	0.750261	0.313193	0.0915951	0.406848
HDAC7	Hdac7	1 hr	0.0599843	1.08987	1.06571	1.19999	0.834248	1.30154	1.90716	0.636077	0.38396	1.64373	1.47337	1.32288	1.35467	1.94804	0.81976	0.531916	0.870914	1.47101	1.54363	1.49712	1.30425	1.87829
HDDC2	Hddc2	1 hr	0.733216	2.87463	1.08589	4.14031	0.61616	0.685167	0.554335	2.50884	1.77791	0.44309	0.594747	1.21613	0.976338	0.280856	0	0.227975	1.92173	4.79884	1.40219	1.68324	1.23715	1.6903
HDGF	Hdgf	1 hr	0.0484215	1.01556	0.291072	0.916212	1.25625	0.933694	0.913149	2.44643	1.13223	1.02613	0.850553	1.39574	1.02523	1.1229	0.940274	0.416859	1.57199	1.09263	1.31375	0.727285	1.96315	0.945734
HDHD2	Hdhd2	1 hr	0	0.841403	1.82271	0.14655	1.5617	0.856073	0.851718	0	1.24079	0.767058	1.06398	0.995441	1.24018	0.833838	0	0	0.827497	0.202481	0.762168	0.128365	0.301734	0.471665
HDLBP	Hdlbp	1 hr	1.17717	0.391299	0.137815	0.360486	0.960693	1.26284	0.611888	0.743112	1.42921	1.13535	0.872552	0.728445	0.898616	1.03334	0.746491	0.44157	1.53844	1.45899	0.530862	0.479352	0.836911	0.579327
HECTD1	Hectd1	1 hr	0.145575	0.605378	0.356774	0.32809	1.28817	1.18457	1.01064	0.627647	1.6019	1.02041	1.3773	0.856841	1.4561	1.02601	0.883909	1.72038	0.647309	0.807464	0.675902	0.535995	0.834158	0.36993
HECW2	Hecw2	1 hr	0.947468	0.270991	0.372742	0.385924	0.255493	0.0273539	0.296997	0	0.211293	0.2628	0.13976	0.412435	0.706063	0.09059	0.262442	0	0.392157	0.160017	0.0109921	0.0482431	0.512564	0.663716
HEG1	Heg1	1 hr	2.21695	0.964473	0.40774	0.1884	0.424245	0.386345	0.417307	0.329549	0.934976	1.05382	1.52269	0.59	1.71073	1.08074	0.633932	0.368548	1.40707	0.704625	0.340021	0.485673	0.336681	0.349113
HELB	Helb	1 hr	4.49248	0.617798	0.791861	0.0566717	2.36228	1.05074	1.4245	1.69552	0.364703	1.23386	1.45361	1.81446	1.45611	2.48835	0	0	0.192375	0	0.612015	0.0780681	0.0254444	0
HEPACAM2	Hepacam2	1 hr	2.74378	0.443678	0	0.0421436	0.368054	0.210016	0	0	0.105827	0.73845	0	0	0	0.0379292	0	0	0.382804	1.1154	0	0	0.233663	2.30432
HERC3	Herc3	1 hr	0.255534	1.0347	0.851127	0.360752	1.21024	1.36462	0.674836	0.313834	0.975005	0.773275	1.07373	1.1514	0.701524	1.25159	0.837925	0.384871	0.386405	0.476281	0.237481	0.590526	0.140897	0.129515
HERC4	Herc4	1 hr	0.0403219	0.41191	0.242877	0.476118	1.741	1.0716	1.61636	0.71864	1.12198	1.57397	1.82974	0.937041	1.17684	1.2482	1.75087	0	0.494505	0.229752	0.359764	0.0993267	0.0293841	0.655497
HERC6	Herc6	1 hr	1.11803	2.11243	0.996115	0	0.662047	0.891055	0.293012	0	0.539972	0.558705	1.04076	0.498604	0.8628	1.04935	1.03608	0.849375	0.199504	0.475812	0.182644	0.705757	1.12053	0.36404
HERPUD1	Herpud1	1 hr	0.151137	0.222275	0.0237511	0.236748	1.17874	0.743617	0.701728	0	0.882038	0.553149	0.852826	0.155833	0.959248	0.25668	0.207345	0.653156	0.12582	0.383188	0.51989	0.294865	0.504387	0.0431874
HES1	Hes1	1 hr	0.0399277	0.0239449	1.54055	0.0675609	0.448923	0.879931	1.01622	0	0.718054	0.778999	0.529949	0.138693	0.720806	0.0680292	0	0.533813	0.141386	5.58285	0.617064	0.493358	0.38224	0.0662144
HESX1	Hesx1	1 hr	0	0.413973	0.792797	0	0.866999	0.728358	0	0	1.73986	0.697114	0.078108	0	0.976351	0	0	0	0.224561	0	0	2.2046	0	0
HEXA	Hexa	1 hr	0.633773	0.877658	1.00072	0.0952497	1.59203	1.37198	1.17165	1.00876	0.42028	1.02972	0.926325	0.875919	1.01303	1.36975	0.503562	0.613263	0.820051	0.498347	0.523426	0.383482	1.11101	0.306557
HEYL	Heyl	1 hr	4.88649	0.872256	0.0778733	1.00822	1.45167	0.614598	1.58301	0	0.558509	2.45138	2.76989	3.1918	1.69481	1.23834	2.04474	1.07783	2.96332	0.280319	0.972164	2.72957	3.04745	2.80532
HFE	Hfe	1 hr	0	2.90344	0.0502906	1.68608	1.13724	0.964573	1.37494	0	0.617903	1.19993	1.24586	1.07085	0.755364	2.03744	3.45966	0	2.42032	0.750671	2.96614	1.01419	0.0740948	5.87327
HGFAC	Hgfac	1 hr	20.9256	2.3058	2.65265	9.34987	2.82607	0.250335	0	0	0.404155	0.538371	0.502178	16.9278	0.879189	0.571548	0	0	15.3489	9.31669	1.22302	0.610757	14.2284	7.40449
HGH1	Hgh1	1 hr	0	0.793033	0.229126	0.285541	1.42449	0.982817	2.10098	0	1.73799	1.24609	1.05581	1.88868	2.29646	1.93866	2.07525	3.10582	4.60801	0.459242	3.25379	0.748495	1.29533	3.66428
HGS	Hgs	1 hr	2.03323	1.3476	0.812138	1.49583	1.01445	1.17426	2.61844	0.650477	0.524234	1.06466	0.949795	1.41127	1.33971	1.44714	0.407738	1.46792	0.955598	1.13011	0.877857	2.06262	1.065	1.4228
HGSNAT	Hgsnat	1 hr	1.33662	0.315853	0.111964	0.367157	1.32693	1.98704	1.422	0.963609	0.713241	1.85789	1.92446	1.7832	1.69197	1.24258	1.34608	1.12097	0.59202	0.396453	1.02959	1.00123	1.14155	0.545886
HIF1A	Hif1a	1 hr	0.035136	0.37512	0.19411	0.0316452	0.342702	1.54034	0.339618	0.326851	0.115734	0.702687	2.80686	0.222818	1.95251	0.459233	0.188447	0.254927	0.460909	1.52418	0.352987	0.378505	0.788354	0.0800853
HIGD1A	Higd1a	1 hr	0.0643409	0.694269	0.67948	3.5738	0.580579	1.54749	0.982802	1.54888	1.16565	1.05936	1.25544	0.238082	1.97663	0.514604	0.292373	0.24278	0.760775	2.74174	1.26545	2.76747	0.879815	2.76192
HILPDA	Hilpda	1 hr	2.71009	18.7747	4.73457	7.88737	0.719882	0.477963	5.12341	0	1.37316	1.20372	1.06954	4.85406	2.52595	2.77179	9.36533	0	0.112635	2.98531	2.04603	0.700294	0.977473	10.859
HINT1	Hint1	1 hr	0	0.0264168	0.0598092	0.0745355	1.17707	1.58236	0.784237	0	1.16021	0.564958	1.56072	0.0267398	1.57371	0.887321	0.740511	0	0.0109155	1.6215	0.319004	0.0729208	1.22396	0
HINT3	Hint3	1 hr	2.233	0.77755	0.234961	1.51049	1.427	1.18362	0.547798	0	6.24164	0.811345	1.06621	0.662006	1.70404	0.335946	0.886549	0.334877	2.02596	0.825237	0.812814	0.306024	0.181664	1.31466
HIP1R	Hip1r	1 hr	0.258497	1.73719	0.993734	1.16291	0.724107	0.984089	1.30618	0.684105	0.0656394	0.569202	0.331174	0.920853	0.587032	1.10443	0.0622699	0.311836	0.79076	0.2959	1.13193	1.30618	0.641125	1.28952
HIVEP2	Hivep2	1 hr	0.554363	0.903919	0.539598	1.46589	0.544871	0.817891	0.31528	0	2.02276	0.954259	1.0918	0.799397	0.993771	0.799039	1.45201	0.494569	0.764556	0.958139	0.887327	0.50956	0.265675	0.639958
HK1	Hk1	1 hr	0.0930827	0.518616	0.840796	0.773009	0.424947	1.61005	0.555034	0.679046	2.40172	1.47773	1.07923	1.09208	1.60911	1.22407	0.733393	1.43527	1.82154	1.70122	0.733217	0.756605	0.577893	0.360798
HLA-DMA	H2-DMa	1 hr	0.215316	0	0.292349	0	0	1.59245	0	0	0.947136	1.50058	3.17227	0	0.942084	2.21535	0	0	0.315081	0	3.65279	0.530396	0.041674	0.73624
HLA-DQB1	H2-Ab1	1 hr	0.771823	0.0768374	0.0670307	0	0.732919	0.310044	0.500144	0	0.508873	0.925174	2.1189	0.916553	0	0.170271	1.09275	2.18022	2.31611	0.130074	1.70066	0.568683	1.86457	0
HLF	Hlf	1 hr	0.362515	1.55349	0.535713	0.0246826	2.7391	0.731915	0.578614	2.23923	0.922743	0.897977	1.07193	0.790263	0.721337	0.807054	0.300305	2.69485	0.27663	0.127023	0.558801	2.05982	0.925094	0
HM13	H13	1 hr	9.17668	0.277163	0.183514	0.0786111	1.24085	1.07726	1.10355	1.4833	0.524249	0.96321	1.04298	0.401364	0.553485	0.969835	0.524723	0.216378	0.602703	0.755455	0.408305	1.38781	0.093492	0.451948
HMBS	Hmbs	1 hr	0	3.84076	0.125403	2.76793	0.195146	0.349664	0.40898	3.04338	0.968552	0.286286	0.510413	0.671161	0.518538	0.470327	0.321767	0	0.173072	0.204896	0.02397	0.0295224	0.240784	0.315808
HMG20B	Hmg20b	1 hr	0.193007	0.661482	0.677336	0.473129	1.2234	1.14386	2.47592	0.540765	0.494015	1.17124	0.842152	0.220819	1.31837	1.23022	0.453812	0.188949	1.47258	0.568794	1.37653	1.4281	0.148908	2.09716
HMGB2	Hmgb2	1 hr	3.0371	5.43972	6.68247	2.96625	1.00516	2.41728	0.957108	1.20256	1.17838	1.6648	1.38493	1.31494	1.81838	1.68615	2.14704	2.66391	0.709617	1.1193	3.86097	4.63892	1.50282	3.05995
HMGB3	Hmgb3	1 hr	0.587252	3.29885	0.523214	0.980995	0.288051	0.830779	0.522394	0.721233	0.304204	0.406042	0.431051	0.47787	0.378656	0.589548	0	0	0.783222	0.822826	1.33768	0.63317	0.0582989	0.297644
HMGCR	Hmgcr	1 hr	0.039852	0.0416634	0.625302	0.22725	1.22039	0.939151	0.305668	0.513985	0.423296	0.760401	0.834437	0.186638	1.10849	0.165368	0	0	0.886268	0	0.185528	0.0236658	0.305902	0.794936
HMGCS1	Hmgcs1	1 hr	0	1.2736	0.806424	0.0637077	0.535102	0.689748	0.451579	0	0.430016	0.41378	0.69256	0.288581	0.800799	0.421493	0.222146	0	0.565102	1.17363	0.44915	0.0304689	0.0302984	0.154688
HMGCS2	Hmgcs2	1 hr	0.448275	0.992193	0.0735624	0.232355	0.207807	0.095811	0.0549941	0	0.251885	0.140099	0.0340838	0.17067	0.0538231	0.0660765	0	0.516442	0.349787	0.199233	0.254478	0	0.823573	0.258159
HMMR	Hmmr	1 hr	1.04896	0.0377163	0.0665582	8.45733	0	1.27659	0	0	0.597249	0.281763	1.20737	0	0.615885	0.0718829	0	0.879456	3.71129	1.35246	0.141991	4.06094	0.603461	4.36711
HMOX1	Hmox1	1 hr	0.100181	0.198967	0.0542321	0.0390611	1.42477	0.26715	0.879833	8.89685	0.233146	2.20913	0.33603	0.898404	0.242824	0.457136	0.207163	0.384333	0.519826	0.454608	0.18214	0.993965	0.69159	0
HMOX2	Hmox2	1 hr	0.456493	0.998795	5.31357	2.44613	0	1.49485	0	0	0.89338	2.26459	0.830061	0	0	1.88906	0	0	1.46117	0	1.82009	1.9089	0.260079	1.27871
HNF1B	Hnf1b	1 hr	0.0820998	0.692882	0.371637	0.68545	0.229768	2.34714	0.294886	0.651902	0	1.49707	2.02412	0.202402	0.0173646	1.45536	0	0	0.131207	0	0.706947	1.29845	0.489925	0.696042
HNF4A	Hnf4a	1 hr	0.890423	0.349267	0.791385	0.475333	3.46232	0.031668	1.10506	0.319705	0.0134247	0.165915	0.0314887	1.64548	0	0.268225	0.237543	0.429479	0.339921	0.0205069	0.0468184	0.339741	0.211456	0.449179
HNRNPA0	Hnrnpa0	1 hr	0.0526908	0.407233	0.967131	0.388536	0.805118	1.19056	0.741997	0	1.29741	1.49512	1.27632	1.00653	1.29927	1.96099	1.44536	0.919848	0.646196	2.78241	2.46441	1.32809	5.90384	0.476921
HNRNPA1	Hnrnpa1	1 hr	0.0642136	0.466989	0.761385	0.479064	0.976443	1.31393	0.556913	1.14819	0.812329	1.56493	1.57324	1.07242	1.8805	1.07621	1.17971	2.58831	2.31236	1.52358	1.12866	0.829073	1.857	0.742797
HNRNPA2B1	Hnrnpa2b1	1 hr	0.0846621	0.750963	0.504602	0.415399	1.27365	1.47059	0.573625	0.433438	0.777296	1.43964	1.57404	0.564169	1.25306	0.990579	0.460977	0.294941	0.431099	1.40202	0.829221	0.500184	0.543394	0.427147
HNRNPAB	Hnrnpab	1 hr	0.141684	1.304	2.83913	0.558873	1.19743	1.24243	2.03415	2.51699	1.15767	1.41895	1.13312	0.591802	1.48362	0.938088	2.17134	1.07207	0.913104	1.02047	1.28279	1.92646	4.60949	2.18143
HNRNPD	Hnrnpd	1 hr	0.149374	4.90595	3.09139	5.76416	1.25217	1.83981	1.98661	1.10888	1.17903	2.03864	1.39977	1.52201	1.4737	4.48118	1.29644	1.13513	4.2022	2.42577	4.55672	4.32701	2.58151	4.93453
HNRNPDL	Hnrnpdl	1 hr	0.0349442	0.350699	0.371585	0.20798	1.12957	1.15499	0.447239	0.553697	1.19823	1.27267	1.37458	0.642255	1.07372	0.78119	0.428895	0.393995	0.550608	1.24525	0.666202	0.522552	0.650134	0.364889
HNRNPH1	Hnrnph1	1 hr	0.0939095	0.925866	0.355453	0.824606	1.51404	1.2689	1.64105	0.348076	0.581373	1.41109	1.73588	0.951851	1.58749	1.65088	0.525574	0.497241	0.756568	1.31054	1.43154	0.765487	0.801538	0.911402
HNRNPK	Hnrnpk	1 hr	0.0180116	0.306532	0.497132	0.150378	0.900709	1.04051	0.624554	0.0843512	0.837424	0.780989	0.961867	0.404186	1.04587	0.499494	0.567494	0.0434442	0.649217	2.41862	0.330517	0.329389	0.544591	0.355439
HNRNPL	Hnrnpl	1 hr	0.196211	0.269055	0.415807	0.930533	0.819523	1.20009	0.991784	0.650084	1.14731	1.01264	1.03899	0.940398	1.05805	0.86297	0.366347	0.324859	0.713893	1.42765	0.579964	0.675462	1.31093	0.53821
HNRNPM	Hnrnpm	1 hr	0.368704	2.28648	1.04148	1.37919	0.863312	1.46913	1.0358	0.430854	0.970784	1.0345	0.905089	0.958968	1.24842	1.08541	1.16652	0.425503	1.24624	1.57612	1.54597	1.742	0.649059	0.91825
HNRNPUL1	Hnrnpul1	1 hr	0.117381	1.02157	0.787382	1.2164	0.772398	1.11924	0.847701	1.26953	1.00722	1.16837	0.992262	1.27027	0.938562	1.21162	0.347611	0.169144	1.38995	1.31953	1.64517	1.73314	1.92612	1.11005
HNRNPUL2	Hnrnpul2	1 hr	0.485723	0.400585	0.109187	1.08836	2.50234	1.92463	0.918256	1.32112	2.47285	2.45512	1.9938	0.0726741	3.61352	2.54552	2.69245	1.60059	1.36782	2.0835	1.1684	1.35553	1.39239	0.861908
HOGA1	Hoga1	1 hr	0.376689	0.743125	1.00263	0.0698432	2.6667	0.90676	1.76506	1.06367	0.117099	0.299717	0.443969	0.753938	0.0570279	0.303802	0	0.513812	0.263914	1.36627	0.167319	0.362111	0.220423	0.68842
HOMER2	Homer2	1 hr	0.774406	1.77658	0.0728135	0.0803459	1.19945	1.70592	1.32535	0	11.6473	0.94532	0.961461	1.68816	0.168224	1.43367	0	2.41648	0.13648	0	1.98085	0.810812	1.05131	0.651017
HOMER3	Homer3	1 hr	0.259393	2.31997	0.539265	3.85887	1.60874	1.51133	3.72812	2.85149	2.47211	1.14495	1.41249	1.71021	1.55623	1.76022	5.23932	1.67713	3.20343	0.198614	3.92569	3.05076	3.81109	2.94141
HOOK2	Hook2	1 hr	0.658334	2.46786	0.533741	1.07041	1.30464	1.30657	2.57182	1.55256	0.758262	0.833253	0.592872	1.37173	1.10542	2.16461	0.362743	0.523127	0.862079	0.791461	1.56604	2.17398	0.375407	1.44099
HOPX	Hopx	1 hr	16.4522	0.0449788	3.37659	0	0	0.716486	0.993238	3.98248	1.83037	0.473601	2.03939	0.484184	4.21214	1.24194	11.0002	0	1.27793	2.52093	0	0.115357	1.45626	0
HOXB5	Hoxb5	1 hr	0	0.0676484	0.80948	0	0.969167	2.99632	3.17165	0	0.470318	1.48734	2.59457	0.739991	0.298665	1.97975	0	0	0	0.0842154	1.71744	2.80488	0.228716	0.520479
HOXB6	Hoxb6	1 hr	1.54436	2.80368	0.732349	1.39879	0.823302	3.25502	1.71812	0	0.271765	2.07523	1.80428	2.20854	1.57509	3.28479	0.304615	0.964694	0.953607	1.35581	1.94191	3.45164	0.446828	3.82846
HOXB7	Hoxb7	1 hr	0	0.812377	0.690481	0.83449	0.469115	1.00566	0.276456	0	0.285845	1.08581	0.5121	0.38454	1.19288	0.381747	0.705767	3.94751	0.78972	0.663868	0.940867	1.1762	0.615451	0.86025
HOXB8	Hoxb8	1 hr	0	0.416558	0.0408657	0.173816	1.02137	1.46626	1.57606	2.39637	0	2.34978	1.41586	1.58777	0.789799	1.65561	0	0	0.0177085	0.609989	4.12853	1.01865	0.370516	1.33767
HOXB9	Hoxb9	1 hr	0	0.133368	0.17321	0.631861	0.579861	2.06767	0.245973	2.07085	0	1.8881	1.48182	3.29922	1.16851	0.745963	0.606983	0	1.1152	2.79081	1.65485	1.99827	1.91448	0.436205
HOXC9	Hoxc9	1 hr	0	1.19383	0.0529134	0	1.04986	1.3858	1.18645	0	3.86227	2.08065	1.32858	2.86102	0.921473	0.777909	0.487296	2.0909	0.335323	4.28988	1.1241	0.14664	0.10193	4.82661
HOXD10	Hoxd10	1 hr	0.943627	0.937079	0.039163	0.550549	0.623586	1.45092	1.12616	0	0.0168741	2.29507	1.72789	0.149159	1.21997	2.89378	2.88786	0	0.566353	1.14398	1.88291	1.77927	0.173274	0.619682
HOXD9	Hoxd9	1 hr	0.145213	0.197379	0.0319383	1.58776	0.722231	1.65888	2.0449	1.60245	0.958149	2.92342	1.39357	0.194824	0.635359	2.88893	2.97793	0.533795	0.272114	2.72817	1.53474	0.357709	2.34619	1.31437
HP1BP3	Hp1bp3	1 hr	0.217786	1.22801	0.206183	0.326652	1.03958	1.52693	1.85115	0.446801	1.01322	1.57712	1.26116	1.74295	1.50538	2.38898	1.02289	0.644642	0.747413	1.44895	2.23313	1.4829	0.568535	1.75202
HPCAL1	Hpcal1	1 hr	0.0594249	0.165118	0.932414	0.484113	1.02207	0.626924	1.14755	1.24296	0.467122	0.455097	0.386959	0.741069	0.720593	0.825327	0.433924	0.172698	0.0201278	0.37781	0.530206	0.459802	2.29021	0.537874
HPGD	Hpgd	1 hr	0	0	0	0.0651644	0.913853	0.187292	0	0	0.226524	0.193055	0.0687107	0.0917621	0.329812	0.0509789	10.612	0	0.0144071	0.861322	0.179756	0.507795	0.301441	0
HPGDS	Hpgds	1 hr	0	0.0727603	0	1.4067	0.838475	0.266788	0	0	0.179673	0.331628	0.246494	0	0.637024	0.393004	0	4.15278	0.632569	0.0905791	0.401419	0	0.0653358	0
HPN	Hpn	1 hr	0.363731	0.395136	0.459281	0.107733	1.89634	0.761051	1.37597	1.3384	0.103486	0.314876	0.360357	1.00513	0.0500928	0.309876	0.120863	0.37936	0.00560631	0.310968	0.409892	0.348586	0.0667904	0.238863
HPS1	Hps1	1 hr	1.79993	1.6367	1.10282	1.30863	1.64014	1.07318	2.1648	1.702	0.392117	1.09281	1.22257	2.20452	1.53286	1.37142	0.927317	0	0.839996	1.20466	1.1859	1.74994	1.42797	1.71666
HPS5	Hps5	1 hr	0	0.0922579	0.536954	0.3741	0.663303	0.746088	0.315632	0.66801	0.752906	0.768534	0.843354	1.18179	0.584139	0.316356	1.45929	0.550168	0.542747	1.48041	0.191575	0.597594	0.0820606	0.296263
HPSE	Hpse	1 hr	2.2791	3.71539	0.0506092	0	0.340094	0.323899	0.443674	0	0.278351	0.532746	0.421406	0	0.906917	0.0546579	2.9738	3.07636	0.965961	0.161612	2.98493	0.241237	0.599888	0
HR	Hr	1 hr	6.23754	2.57625	19.3045	4.59189	0	0	0	0	0.403226	0.864614	0.54741	5.48631	0.870479	1.30547	0	0	8.40762	8.33724	2.11584	1.82747	0.487781	8.56207
HRAS	Hras	1 hr	0.28854	0.804849	1.21393	2.70083	0	1.77393	0	0	4.28968	2.16594	2.21491	0	0	2.00748	0	0	4.67667	0	5.25123	2.48712	3.54259	3.71888
HRG	Hrg	1 hr	0.15667	1.42762	0.126263	0.319749	0.137444	0.417787	0	2.33887	0	0.0439058	0.252254	0	0.106765	0.040906	0	0	2.43991	0	0.432922	0.412469	0.242436	0
HS1BP3	Hs1bp3	1 hr	0	0.338021	0.854386	0.468167	0.815785	0.644823	1.54783	0.793742	0.591668	0.491897	0.429777	0.249851	0.594094	0.657901	2.15606	0.334224	0.569626	1.57356	0.818949	0.241624	0.416488	0.245948
HS3ST1	Hs3st1	1 hr	3.43441	0.114109	0	0.172124	0.387279	2.59607	1.78309	0	0	0.535197	3.38869	0.617801	1.9775	3.37447	0	0	0.628175	9.19787	0.44952	0	0	0
HS6ST1	Hs6st1	1 hr	0.853494	0.0046693	0.0341683	0.00988794	0.997693	2.62091	0.349978	0	0.702868	1.37157	1.26588	0.224181	0.665183	0.559218	0.68463	0	0.361953	0.652	2.21188	0.205394	0.21693	0.0621292
HS6ST2	Hs6st2	1 hr	0	0.263278	0.134781	0	0.274113	1.60524	0	0	0.24811	0.0697742	1.97946	0	0.510955	0.101628	0	0	0.0500554	0.0396543	1.07023	0.154933	0.0286031	0
HSBP1L1	Hsbp1l1	1 hr	0	0	0	0	1.78158	1.83656	2.50943	0	1.50194	0.627721	1.41128	1.16296	2.12966	0.520673	0	0	0	0	0.76062	1.92139	0	0.411805
HSCB	Hscb	1 hr	0.653997	1.82425	0.23109	5.75506	1.67227	2.05989	0.748482	0	1.98533	2.31261	2.3479	7.41538	1.34215	1.07007	0	1.12813	0.319884	0.181002	0.18214	1.30401	0.192955	0
HSD11B2	Hsd11b2	1 hr	0.250886	0.0587117	0.0182783	0.00251921	0.282222	0.520567	0.366713	0	0.0179004	0.624961	0.0580119	0.157101	0.168591	0.279157	0	0	0.0139676	1.01855	0.123819	0.0965978	0.0315601	0.086395
HSD17B11	Hsd17b11	1 hr	0	0	0.597454	0.0934891	1.98497	0.639399	1.54215	0	0.714524	0.935726	0.696369	0.666528	1.07408	0.524833	0	3.40526	0.341194	1.58577	0.066778	0.235601	0.371035	0
HSD17B12	Hsd17b12	1 hr	0	0.0914705	0.136039	0.0175882	1.14874	1.01509	0.666855	0	1.05009	0.852608	0.797869	0.141722	0.596143	0.313656	0.172053	0.149978	0.0455259	0.232475	0.258977	0.412903	0.0597041	0.369292
HSD17B4	Hsd17b4	1 hr	0.657779	0.427386	0.441909	0.00333447	0.900713	1.34107	0.621915	0.317756	0.815684	1.02329	0.887801	0.689401	0.922202	0.574806	0.421421	0.410639	0.222742	0.431072	0.563747	0.376702	0.364809	0.457285
HSD3B2	Hsd3b2	1 hr	24.6869	0.644496	0.179374	3.8628	0.437312	0.0792584	0.914253	0	0.252375	0.268366	0.00695249	0	0.894786	0.159907	0	0	0.0451912	0.636153	0	3.14322	0.945539	4.29177
HSDL1	Hsdl1	1 hr	1.368	0.0210843	0.0372075	1.37817	2.61742	1.25116	1.01725	3.53843	3.33801	1.51311	1.36824	0.398864	1.56916	1.25563	0	0	3.28939	2.82876	0.518177	0.10046	0.559353	0.578453
HSDL2	Hsdl2	1 hr	0.0396256	0.639819	0.0149903	0.945145	1.28591	0.694145	0.940439	4.23535	3.71382	0.64836	0.714771	0.810523	0.3747	0.294112	0.607979	0.5002	0.0326533	0.358954	0.514028	0	0.0196966	0.285281
HSF2	Hsf2	1 hr	0.421913	0.978161	0.0228721	0	0.447987	0.605652	0.369002	0	3.11899	0.514469	0.801589	0	0.685094	0.552589	0	2.3453	1.27535	0.0279039	0	0.17215	0	0
HSF2BP	Hsf2bp	1 hr	32.4919	3.30779	1.45204	0	0.238802	0.374875	0.726921	0	0.324111	0.413324	0.436152	5.59549	0.357453	0.238502	0	3.12906	0.725419	0	0.351445	0.33913	2.59799	0
HSP90AA1	Hsp90aa1	1 hr	0.295623	3.02087	1.65758	0.690057	1.73886	1.73886	0.47505	0.619523	0.408221	1.0393	1.8005	1.18382	2.10254	0.709664	0.52264	1.08561	0.330929	1.0393	3.37046	1.43059	1.06136	1.15167
HSP90AB1	Hsp90ab1	1 hr	0.0241809	1.11402	0.715214	0.484822	0.813097	1.56473	0.418263	0.381807	0.83816	0.843042	0.843042	0.575148	1.21914	0.717926	0.490743	0.300145	0.717926	0.745947	1.46421	0.876118	0.945466	0.627161
HSP90B1	Hsp90b1	1 hr	0.024172	2.10703	0.718541	0.873938	1.49622	2.26746	0.561265	1.46243	0.220731	1.07137	0.809846	0.709668	1.28093	0.645178	0.787986	0.881856	0.391663	1.19793	1.88908	0.981983	0.275491	0.603578
HSPA1A	Hspa1b	1 hr	0	2.92496	0.0269698	0.0195298	0	0.57613	0	0	1.39127	0.757279	0.422017	0	0	0.466125	0	0	0.00763922	0	0.55122	1.25044	0.989711	0
HSPA1L	Hspa1l	1 hr	8.50697	0.23541	7.08563	0	0	0.732881	0	0	9.58853	0.840592	0.369772	0	0	0.760642	0	0	0.4686	0	1.2992	4.15188	3.70216	0
HSPA4	Hspa4	1 hr	0.0993249	0.0995783	1.54673	0.198417	1.07171	1.05933	0.399454	1.74654	1.53296	0.836268	0.767967	0.198798	1.34994	0.417321	0.885033	0.404712	0.560067	1.73121	0.654218	0.691705	0.472485	0.103697
HSPA4L	Hspa4l	1 hr	0.343251	0.03616	1.35439	0	2.04613	1.05153	0.463224	0	0.638983	0.435398	0.546634	0.274291	0.471491	0.590321	0.913207	0	0.324969	0.150487	0.140406	0.354677	0.533124	0
HSPA5	Hspa5	1 hr	0.0579361	0.800687	0.396788	0.103351	1.03316	1.18104	0.562599	0.843735	0.376919	0.681872	0.641191	0.406997	1.06831	0.484063	0.916002	0.520996	0.203439	0.481951	0.85929	0.454989	0.746032	0.236634
HSPA8	Hspa8	1 hr	0.018176	0.0953941	1.10979	0.0747016	1.13331	0.761334	0.350221	0.515164	0.817079	0.5919	0.657624	0.298237	0.982624	0.490867	0.380185	0.28002	0.66307	0.490077	0.337555	0.201268	0.661803	0.128288
HSPB1	Hspb1	1 hr	0.0129037	0.0517285	0.617071	0.226364	0.424556	0.640722	0.328421	0	2.53038	0.840616	0.465064	0.333719	0.815849	0.423515	2.19566	0.102946	0.848298	1.28004	0.199421	0.545798	0.727756	0.116796
HSPB6	Hspb6	1 hr	0	0.184057	1.39252	4.19274	1.02694	1.6801	0.961332	7.47783	41.0257	7.59833	1.90064	4.11365	0.323574	3.90889	58.1433	3.61986	12.5883	0.627647	0.659787	2.35771	0.271451	3.94596
HSPB8	Hspb8	1 hr	0	0.0969277	0.0845568	0.0867319	1.64179	0.597064	2.7742	0	8.43842	0.626971	0.619902	3.18529	0.0967917	0.542142	2.71153	0.26944	0.981376	0.0918978	0.024062	0.15348	0.306552	1.33796
HSPE1	Hspe1	1 hr	0	0	1.00599	0	0.816501	0.86657	1.86409	0	1.82172	0.409021	0.645498	0.70481	1.06915	0.361263	0	0	0	0	0	1.29408	0.170233	0
HSPG2	Hspg2	1 hr	0.653301	0.425969	0.839931	0.496557	0.408739	0.626604	0.702603	0.137363	0.30937	1.4296	1.09926	0.672946	1.2851	1.20353	1.97659	0.19507	0.543507	1.34027	0.395182	0.417469	0.623355	0.446786
HSPH1	Hsph1	1 hr	0.185417	0.669186	8.04328	0.0641962	1.08245	0.793241	0.364608	0	0.832274	1.00125	1.94319	0.212813	1.1095	0.570122	0.902053	0.222604	0.465046	1.97355	0.832274	0.160555	1.16631	0.316773
HTR3A	Htr3a	1 hr	8.202	32.1904	0	9.86045	0	2.2899	0	0	0	0.218581	1.55089	1.43639	0	6.01272	0	13.1739	7.01195	3.17463	2.8138	0	18.1631	0
HTRA2	Htra2	1 hr	1.55644	0.431515	2.28627	0.661806	0.681844	1.07328	1.00555	3.12446	1.94139	0.858231	0.712888	1.91119	0.243274	1.4286	0	0.55936	0.681562	2.41468	1.87846	0.201787	0.0956726	2.42568
HUNK	Hunk	1 hr	0.864397	2.98974	0.361617	5.7473	0.574385	0.713553	1.30745	1.15466	0.122901	0.984204	0.648385	1.61028	0.707515	0.620891	0.828969	0.341957	1.7504	1.87984	1.12532	3.61233	2.00918	4.15937
HVCN1	Hvcn1	1 hr	0	4.52136	1.85403	1.74888	0.148128	0.112567	0.185736	0	0.49683	0.379147	0.383752	1.26792	0.200318	0.767503	0	0	0.732454	1.33392	0.0452827	0	0.704056	1.88729
HYAL1	Hyal1	1 hr	0	0.125541	3.12653	0.36447	1.65272	0.659231	1.24719	2.14511	0.539685	0.330478	0.395834	0.698314	0.253791	0.107477	0	0	0.23507	0.319065	0.17152	0.813181	0.027834	1.64557
HYKK	Hykk	1 hr	0	0.178058	0.782974	0.107914	1.1235	1.10432	0	0	2.26918	0.453837	0.748801	1.91487	2.29556	0.546163	0	2.27638	0.598321	0	0.486211	0.130695	3.13849	0
IARS2	Iars2	1 hr	3.69894	0.526488	0.383249	0.239278	1.22809	1.01353	0.296815	0	2.0625	0.787256	0.70965	0.405385	1.11275	0.261715	0.680666	0.473	0.571105	1.15888	0.770288	0.0986654	0.309132	0.317702
ICAM1	Icam1	1 hr	0.32252	2.03048	2.12217	1.63225	0.686378	0.901392	2.07237	2.67007	0.43412	0.721986	1.62515	4.94108	1.88601	1.56717	0.530848	1.02541	1.47753	0.649951	2.44018	0.510111	0.0462497	4.47217
ICOSLG	Icosl	1 hr	0	0	0	0	2.16539	0.622185	1.76946	0	1.37823	0.662721	0.353514	0	0	0.858804	0	0	0	2.49817	0.166859	0.674034	0	0
ID1	Id1	1 hr	0.165275	0.198855	0.184584	0.0308514	0.253527	0.817562	2.92773	0	0.566973	0.968356	1.35389	0.248595	1.04569	0.705384	0	1.15252	0.817667	0.319847	1.53585	0.553751	0.615139	0
ID2	Id2	1 hr	0	1.34509	0.051388	0.193738	0.608229	0.426636	0.610542	0	0.254957	0.350711	0.988764	0.630618	0.222075	0.433163	0.483063	4.23356	0.492564	0.0395737	0.0264375	0.435972	0.539408	0
ID3	Id3	1 hr	0	0.780586	4.74345	5.63793	1.24364	0.767838	1.22344	0	0.646322	1.96198	1.34645	1.26367	1.28404	1.48071	1.58303	0	1.58137	0.788698	2.17703	9.84615	0.759726	6.21141
IDE	Ide	1 hr	0.302677	0.206269	0.0400309	1.04692	0.679109	0.999421	0.618098	0	2.04846	0.67454	1.14114	0.103488	0.562041	0.671966	0.449607	2.91408	0.130068	0.0308276	0.0335951	0.240636	1.98668	0
IDH1	Idh1	1 hr	0.565887	0.169168	0.0230318	0.171221	1.69864	0.637393	0.516431	0	1.28219	0.667655	0.595167	0.919845	0.873335	0.500184	0.578742	0.393505	1.02322	0.272097	0.0465993	0.0638285	0.201305	0
IDH2	Idh2	1 hr	0.218363	0.0104603	0.281649	0.209108	0.4746	1.2529	0.932771	0.872265	2.83259	0.339375	0.477905	0.362181	0.296426	0.217216	0.996855	0.205822	0.151499	0.230767	0.54127	0.279258	0.418741	0.525521
IDH3B	Idh3b	1 hr	3.26412	0.208102	0.414321	0.443864	1.18329	0.810396	1.01817	1.7976	1.75396	0.785138	0.597359	0.845913	0.639889	0.319457	0	4.87452	1.34802	0.462629	0.395101	0.98428	1.0146	0.961554
IDH3G	Idh3g	1 hr	0	0.070385	0.224482	0.0442251	1.16318	0.938993	0.788351	0	2.10721	0.75074	0.704837	1.74116	2.23899	1.16792	1.0463	0.633268	0.325271	1.36811	1.09033	0.681343	0.783021	0
IDI1	Idi1	1 hr	0	0.0485729	0.757808	1.03844	0.581093	0.817307	0.15617	0	3.57231	0.380032	0.738688	0.37932	1.51502	0.374213	0.644868	0	0.286806	0.108666	0.24809	0.444044	2.75345	1.16884
IDNK	Idnk	1 hr	0	0.100101	0.532695	1.38746	1.97765	0.468876	0.135081	0	0.306816	0.52302	0.325422	0	0.187923	1.63418	0	0	0	1.59195	2.53323	1.2842	0.734758	1.5992
IDO2	Ido2	1 hr	0.936832	2.03759	1.32658	1.03555	0.0336087	0	0	0	0	0.0151102	0.0283889	0	0.0533894	0.0727121	0	1.75489	0.0696901	0.205041	0.147347	0.0370887	0.0310446	0
IER2	Ier2	1 hr	0.682951	0.837715	0.0833781	0.968826	0.399305	0.754669	2.16897	0.473724	0.249613	0.914884	2.27169	0.361811	1.14909	1.13018	0.658493	0.179981	0.513351	2.22926	1.88257	1.43079	3.06684	0.466519
IER3	Ier3	1 hr	0.0632957	0.176556	0.916273	0.214236	0	1.83657	0	0	0.585912	0.974721	2.60295	0	0.0431336	1.57749	0	0	0.767591	0	0.869338	1.1591	3.26824	1.48896
IER5L	Ier5l	1 hr	2.61532	1.02082	0.761045	3.50332	0.641864	1.21568	2.00127	1.50968	0.245727	1.11859	1.21568	3.57927	2.18236	1.95805	0.797318	0	0.0315	1.30827	0.982909	3.16909	7.47736	3.53059
IFFO1	Iffo1	1 hr	0	0.574151	0.806959	0.833248	0.68697	0.449217	2.4606	1.90697	0.983399	1.11056	0.676669	1.30612	0.424164	1.93433	3.20015	0.448393	2.89086	0.467677	0.729082	1.41663	1.16256	3.29113
IFI35	Ifi35	1 hr	2.20884	0.0824788	4.39253	0.680527	1.11162	0.955405	1.13293	0	0.186574	0.307532	0.545157	0.625643	0.16833	0.409481	1.80319	6.59294	0.0259088	0.799339	2.24379	1.98148	0.0519708	0.556502
IFI44	Ifi44	1 hr	0	0.0125903	0.0222182	0.0266618	1.05536	0.629664	0.19478	0	0.95242	0.929609	2.21338	0.350899	1.8764	0.561824	0	0.293576	1.23889	0.511611	0.238327	1.46699	0.0502131	0
IFIH1	Ifih1	1 hr	0.110169	0.558131	0.218037	0.0836094	0.244404	0.76984	0.0696106	0	0.5379	0.599073	0.750855	0.154179	0.846066	0.382379	0	0.190039	0.80196	0	0.304427	0.66178	0.501944	0.470783
IFIT1B	Ifit1	1 hr	0.333297	0.199881	0	6.51347	0	0	0	0	0	0	0.193039	0	0	0.229203	0	0	0.0562011	0.330365	1.55164	2.97866	1.9299	0
IFIT2	Ifit2	1 hr	0	0.0773235	0.0215586	0.0916959	0.293916	0.490818	0.26977	0	0.403865	0.362328	0.351118	2.67729	0.823539	0.406739	0.41335	2.09463	1.1199	0	0.456324	0.991983	2.02752	1.06025
IFIT3	Ifit3	1 hr	0	0	0.112027	1.70218	0.36947	0.908553	0.159088	0	0.920409	0.43988	0.81673	0.599573	1.47957	0.283938	0	11.3868	0.653408	0.470125	0.141546	0.136585	0.0267364	0.439154
IFITM1	Ifitm3	1 hr	0	0	0.062635	0	0.270133	1.24699	0.112002	9.97532	1.1228	0.676026	0.755477	0.248072	1.42147	0.736501	0	1.0216	0.919778	2.30176	1.28016	1.99398	1.10737	0
IFNAR1	Ifnar1	1 hr	0.233039	0.254464	1.02131	2.82561	1.45447	1.46445	0.343837	2.3938	0.849312	1.10227	1.47546	1.41658	2.16465	0.766578	1.53191	0.630467	1.46877	0.666897	1.21711	1.05704	4.00046	2.20885
IFNAR2	Ifnar2	1 hr	0	0.775857	0.192235	1.38288	0.508112	1.46399	1.08776	1.47105	1.84934	1.67565	1.78089	1.25188	1.87775	2.25633	1.68757	7.68615	1.14693	0.134682	0.637201	2.34597	0.26171	0.166476
IFNGR1	Ifngr1	1 hr	0	0.812339	0.0131333	0	0.805773	0.930102	0.31196	2.91306	1.20529	0.951465	1.37786	0.592926	2.57658	0.404594	0.313186	0.561668	0.472887	0.749124	0.0280177	0.0988501	0.0296813	0
IFNGR2	Ifngr2	1 hr	0.96229	0.124552	0.0201541	0.522528	0.888929	1.49369	0.992924	0	2.0064	1.58223	2.07238	0.548325	2.72926	1.94836	0	0	1.95347	0.522125	4.84195	4.40057	2.54613	0.151962
IFRD1	Ifrd1	1 hr	3.78275	0.218473	1.5424	0	1.22877	0.961622	1.10334	0.905249	1.44063	0.642945	0.795501	0.337832	1.15283	0.752284	1.53729	1.23401	0.406408	1.09066	0.254397	0.0769598	0.399591	0
IFT27	Ift27	1 hr	0.119869	0.0522009	0.0713588	1.89031	0.379819	1.0746	2.39228	0	0.63309	0.862106	0.990939	0.717279	0.297036	0.35697	0.570343	0.348358	0.579131	1.33561	0.461547	0.657169	0.0232004	1.72984
IFT43	Ift43	1 hr	0.629786	0.0482525	0.517576	0.533736	0.565374	1.35152	2.76359	0	0.912473	1.22657	1.40865	1.73732	1.92486	0.944338	0.814147	0.451115	0.227151	0.884477	1.51495	1.02901	0.227151	3.09635
IFT46	Ift46	1 hr	1.60298	0.259206	0.0205177	1.10152	1.11274	1.37701	0.560953	0	1.47672	0.922474	1.00892	0	0.917549	0.365351	1.14721	2.51027	2.73295	0.713194	1.65865	0.413773	0.0463699	0.154703
IGBP1	Igbp1	1 hr	0.223304	0.605964	0.840603	0.0423183	1.31489	1.99056	0.651021	0	3.30111	1.54074	1.47018	0.301707	1.78379	1.03085	1.12427	0.268268	2.03014	1.07723	1.38252	2.25562	2.29926	1.53054
IGF1	Igf1	1 hr	0.792521	0.198877	0.839171	0.381777	0.21144	0.241971	0.0344183	0	0.412782	0.338873	0.0675565	0.403206	0.0759952	0.258279	0.830827	1.94515	3.6738	0.405624	0.499681	0.288952	0.309527	0
IGF1R	Igf1r	1 hr	0.357236	0.814889	0.232463	0.929904	1.66471	0.896147	1.33467	0.317226	0.268934	0.944417	1.02234	1.01085	0.825613	0.826775	0.506911	1.30613	0.596125	0.762266	0.824126	0.705767	0.918735	0.727281
IGFBP2	Igfbp2	1 hr	0	0.0273611	0.067501	0.0334627	0.155839	0.84689	0.115891	1.54143	0.113474	1.39983	0.96232	0.259873	0.676238	0.102499	0.0911781	0.22806	0.0490428	0.67524	0.54327	0.0879163	0.105607	0.377683
IGFBP3	Igfbp3	1 hr	0	0.0611016	0.0267608	1.20799	1.15467	0.524274	0.15951	0	0.347099	1.77412	0.89853	0.797815	1.01335	0.670997	1.52649	0.523813	0.755498	4.18016	0.209275	0.79676	0.117194	0.15371
IGFBP4	Igfbp4	1 hr	0.360152	0.397149	0.232917	0.186636	1.97542	0.524229	0.607465	1.72791	0.235158	2.76416	1.83769	1.46752	1.00603	1.10306	1.79607	0.188681	1.17967	0.401224	1.19437	1.09548	1.00092	0.98963
IGFBP5	Igfbp5	1 hr	0.0263582	0.240417	0.28927	0.330758	0.630052	0.462301	0.274398	0.285419	0.543555	0.960479	3.58315	0.625306	2.26634	1.15356	1.15356	0.960479	0.395199	1.69687	0.829631	1.00752	0.292758	0.543555
IGFBP6	Igfbp6	1 hr	0	0.561588	0.361315	0	1.75235	0.733721	0.149127	0	1.2	5.0204	0.7633	0.187949	0.863951	0.0963369	3.18158	5.75988	1.60055	2.15926	0	0.928655	0.146046	0
IGFBP7	Igfbp7	1 hr	0.00781322	0.206616	0.0530853	0.267128	0.81445	1.62075	0.699807	1.23643	0.099161	1.52238	2.22218	0.660746	1.96599	0.658394	1.76078	0.296987	0.584206	1.0431	1.45642	0.882656	3.58674	0.590769
IGSF6	Igsf6	1 hr	0	0	0	5.21858	0.986283	0.369017	0	0	0	1.06411	0.697778	1.22782	7.28105	0.308633	0	36.2174	0.154316	0	1.57	0	7.02475	0
IGSF8	Igsf8	1 hr	0	0.0551568	0.0838815	1.89745	2.15543	1.53738	1.14508	1.18621	0.552647	1.16099	0.992013	1.88127	0.477801	1.07805	0	0.631674	0.0424802	0	0.354136	0.029399	0.183407	0
IHH	Ihh	1 hr	9.08907	2.0335	3.74508	1.23835	0.966853	0.781209	0.779063	0	0	0.133063	0.0429236	0.444259	0	0.406701	0	3.74723	1.07094	0	0.560153	1.21152	4.92441	0
IK	Ik	1 hr	0.0793793	1.27522	0.681381	0.966758	0.638129	1.33442	0.586486	0.884831	1.1085	0.822594	0.594848	0.962008	0.542399	0.695026	0.441919	2.06118	1.65781	0.576266	1.15481	1.2307	0.500485	1.21825
IKBKB	Ikbkb	1 hr	0.336467	0.547675	1.88447	0.428875	0.549784	0.613033	1.05005	0.376093	0.692022	0.752529	0.69508	0.746412	0.629142	1.04051	0.695555	1.2451	0.98206	0.277146	0.47156	0.554741	0.0725558	0.736525
IKBKE	Ikbke	1 hr	2.027	2.81443	0.659971	0.120648	0.586221	0.953838	1.81615	4.37585	0.15601	0.95762	1.17622	4.43088	0.526653	1.60133	2.19379	6.30452	3.12267	4.52714	2.86567	1.59357	7.79484	2.09659
IKBKG	Ikbkg	1 hr	0.584521	1.59582	3.71333	2.08378	1.15467	1.24515	2.4269	0	0.731757	1.04687	0.774509	0.913268	2.06996	1.82267	0	0	0.445025	1.40031	2.13206	0.131757	0.614373	2.50688
IKZF1	Ikzf1	1 hr	2.14966	0.0657944	3.04424	1.40662	0.162153	0.821063	0.659714	0	0.304359	1.04563	0.723256	1.94713	3.38704	2.38678	0	3.12982	4.1666	1.14617	1.95067	1.24221	1.89292	1.18671
IKZF2	Ikzf2	1 hr	0.138419	0.568011	0.031081	0.0216844	0.904963	0.494164	0.0874605	0	1.52056	0.6009	0.593189	0.91954	0.996279	0.226482	0	0.457421	0.869666	0.26973	1.13578	0.54464	0.630655	0
IKZF4	Ikzf4	1 hr	0.789509	0.0469234	4.74015	1.1131	0.400398	0.662904	0.535635	0	2.17021	0.818061	0.864542	1.28995	0.521912	1.34506	3.04405	6.20651	2.66135	0	0.356131	0.669544	0.0292165	0
IL10RB	Il10rb	1 hr	0.24331	3.6651	0.0231724	0.296298	0.579155	0.496507	0.716954	4.20702	0.97772	0.89121	0.972777	0.630443	1.06886	0.910829	0.769323	2.2176	0.373075	0.345886	0.668755	0.110455	1.10888	0.758509
IL12RB1	Il12rb1	1 hr	1.29301	2.09721	3.16315	2.90468	0	0.140686	0	0	0.391959	0.626218	1.34208	1.55017	0.465901	2.48197	3.08856	0	8.29002	1.21448	3.58652	0.142649	0.465246	0
IL15RA	Il15ra	1 hr	0.493356	1.45335	2.22185	0.159292	0.29836	0.324327	0.754016	0	0.813188	1.12428	0.962244	0	1.65109	0.867118	0	1.10056	0.319083	0.55902	0.931784	0.572003	0.985963	0.282381
IL17RA	Il17ra	1 hr	0.110721	1.62188	7.30129	3.07904	0.790164	1.18419	0.925842	0.854488	0.274449	1.29934	1.12219	1.92501	2.94428	1.78434	0.996774	0	0.547772	4.11258	1.89457	1.32331	2.51679	2.38884
IL17RC	Il17rc	1 hr	3.14513	1.06161	3.12652	0.114287	1.3569	0.99818	3.2319	0.986384	0.664885	0.806303	0.767377	10.105	0.564884	2.55115	3.67699	2.01589	3.85799	3.52679	2.21353	1.88247	0.768294	5.98672
IL17RE	Il17re	1 hr	2.99839	0.568378	0.653876	0.712982	0.696626	0.851638	1.32448	0	0.306679	1.02933	0.918178	2.51737	1.07765	1.17133	3.11772	3.11883	1.79732	3.18054	0.194044	0.150551	0	2.74227
IL18BP	Il18bp	1 hr	0.534553	1.32041	1.11298	0.0991134	1.93419	1.45431	2.85349	0	0.547056	1.65401	1.81439	3.21789	1.57127	2.18084	1.23778	0.903273	0.0864969	3.38725	2.56331	3.07536	0.256308	1.39748
IL18RAP	Il18rap	1 hr	14.7861	0	11.9873	0.486308	1.04043	0.727807	5.89359	0	0.443301	1.08344	0.653373	12.6258	0	0	0	0	0.698033	0	0	7.47822	0.218342	0
IL1B	Il1b	1 hr	6.58039	9.02339	0.692908	12.5971	0.755291	0.184924	0	0	0	0.138136	2.09432	0	3.32417	0.3342	0	30.0668	0.470108	0	0.903453	1.25771	1.51504	23.7661
IL1R2	Il1r2	1 hr	4.97357	6.01625	0.893781	2.97073	0.102951	0.48576	0.499066	0	0.0633112	0.397096	0.3653	1.57228	0.0460827	0.0530862	0.760575	3.58507	1.33794	0.0256326	0.0731161	2.23242	0.38547	0.326641
IL23A	Il23a	1 hr	26.7875	1.3583	0	7.78782	0	1.05941	0	0	1.9893	0.478229	1.24539	1.37491	3.64649	0	0	0	0.767159	0	6.93764	2.37454	0	0
IL2RB	Il2rb	1 hr	10.3457	0.751486	6.5672	0	0.359935	1.27274	1.06602	0	0.986579	0.715817	1.39272	0	2.0907	3.23293	0	0	5.34147	5.40876	1.30436	2.45226	2.70276	0
IL2RG	Il2rg	1 hr	0	1.13095	3.49288	0.358682	0	2.94632	0.885726	0	0	1.18951	0.346482	1.11631	8.44124	9.96869	0	4.63237	0.140301	0	5.28142	0	0.867426	1.37983
IL34	Il34	1 hr	0.836468	0.260016	16.5258	1.41537	0.831562	0.263696	0	0	2.38185	1.77841	0.436631	0	0.403516	3.47097	0	0	0.933361	0	0	0	0.872036	0
IL4R	Il4ra	1 hr	2.47177	2.93061	2.44584	1.44735	0.914528	0.673406	2.50577	1.12227	0.2668	1.82115	1.17533	0.962422	1.04948	3.09305	1.28404	7.82074	1.52082	0.0958909	2.11074	2.35232	0.091861	3.82448
IL6R	Il6ra	1 hr	0.24612	0.958426	0.281374	1.2002	1.26418	0.248682	1.22862	0.341516	0.460906	0.764023	0.39762	2.59503	0.671772	0.904613	0.234666	2.84158	1.08496	0.10289	0.953107	0.667423	0.153325	0.477369
ILDR1	Ildr1	1 hr	0.996133	2.08871	1.19462	0.654602	0.24096	1.03152	0.193918	0	0	0.391965	1.12428	2.05715	1.03447	0.489292	0	0.292278	0.485901	0.134931	0.981534	1.906	0.0732906	0.535302
ILK	Ilk	1 hr	0.525976	0.566183	0.0904391	2.08046	0.747626	0.858991	1.55561	0.38695	1.01766	1.31566	0.959919	0.906859	0.864647	0.842127	0.886961	1.22476	0.556825	0.413994	0.312861	1.42451	1.25149	0.506027
ILVBL	Ilvbl	1 hr	3.01438	1.31105	0.185358	0.39605	1.54102	0.897737	0.921903	0	0.271717	0.608494	0.483842	1.56221	0.384525	0.381869	0	0	0.0298485	0.680513	0.614496	0.567386	0.543592	0.52272
IMMP1L	Immp1l	1 hr	0	0	0	1.27248	0.747611	0.931757	0	0	2.08625	1.05526	1.17765	1.77309	0.950502	1.00453	0	0	1.80287	0	0	0	0	0
IMP3	Imp3	1 hr	3.31408	0.0398698	0.0406835	0	0.906157	0.604828	0.509086	2.04123	2.13046	0.724437	0.751017	0	0.932737	0.154868	0	0	0.0458367	0	0.0480065	0	0.0358015	0.306753
IMPA2	Impa2	1 hr	0.0202708	0.776295	0.400482	2.83919	2.31352	1.22386	2.18479	0.809435	1.31026	0.939561	0.91715	2.03936	1.00061	0.860885	0.960248	0.0844122	0.703504	0.183626	2.07541	1.86164	2.75561	2.98305
IMPACT	Impact	1 hr	0.598885	0.0444141	0.0675443	0.603337	0.858203	1.32938	0.0788378	0	1.09939	0.928679	0.915431	0.0449571	0.989816	0.325776	0.876881	2.16967	2.49631	1.67764	0.0880681	1.23795	0.298845	0
IMPAD1	Impad1	1 hr	2.51741	0.271447	0.0508842	0.826343	0.922617	0.814381	0.610961	0.901578	1.14731	1.05279	1.06518	0.617507	0.944514	0.33628	1.89904	0.874266	0.670222	1.04843	0.530466	0.669755	0.738328	0.731353
IMPDH2	Impdh2	1 hr	0.0444905	1.01663	0.364079	0.48646	0.81629	1.23151	1.23386	0	2.3533	1.0392	0.93828	1.98061	0.747597	0.719937	0.558154	0.71648	4.21159	0.403024	0.470216	1.03972	2.86918	0.320306
INAFM1	Inafm1	1 hr	0	1.35697	0.459604	32.9148	1.5158	2.74075	3.16214	4.96035	1.35052	3.93493	2.40473	3.36116	4.89136	5.2651	8.79601	1.40958	5.37528	3.99647	3.85402	20.2881	1.65477	25.4589
ING1	Ing1	1 hr	1.78898	0.786926	8.94442	1.45936	0.44128	0.643727	1.33285	1.66798	1.21469	1.17196	1.28478	1.13024	0.573964	1.04111	1.49725	8.78253	5.35344	3.30643	1.01558	5.12912	1.32384	2.70426
ING4	Ing4	1 hr	0.839053	0.889295	0	0.184855	1.66475	1.40061	2.7919	0	1.38323	1.41694	1.09853	4.15202	2.29118	2.24878	4.37079	0	0.0489695	1.61091	3.3454	4.3108	0.376917	4.24869
INIP	Inip	1 hr	0	0	0.282799	0.0818388	2.67067	1.72907	1.61995	0	1.73953	0.981612	1.42081	0.188229	2.5611	2.47699	0	0	1.71771	8.0002	3.02622	1.04163	0.0600152	1.65042
INMT	Inmt	1 hr	0	0.0171068	0.186364	1.24779	0.434916	0.202464	0.934033	27.4848	0.640399	2.6739	0.12498	0.997428	0.867417	1.60885	4.07947	2.48532	2.04839	0.0639996	0.0356224	0.043874	0.200854	0.730562
INO80	Ino80	1 hr	0.733477	1.3682	0.691602	0.898499	0.801546	1.14678	1.15635	0.30547	0.862921	1.06074	1.04732	0.716177	0.511114	1.0722	0.699947	0.647894	0.943522	1.3855	1.87305	1.76527	0.431185	0.338878
INO80C	Ino80c	1 hr	2.34035	1.1297	0.190014	1.03194	0.386443	0.38125	0	0	1.74953	0.402939	0.547741	0.491226	0.885611	0.81596	0.991311	8.97251	0.304878	0.0971454	0.0540715	0	0	0
INO80E	Ino80e	1 hr	3.17905	0.142283	1.57787	1.40105	1.43512	1.15981	4.49016	4.22867	0.865173	1.4055	1.0139	5.5735	1.51757	2.56343	2.02018	1.94242	0.14966	0.217347	1.84804	1.93821	0.537396	1.89745
INPP1	Inpp1	1 hr	0.283237	0.228513	0.560559	2.31594	1.00107	1.32671	1.01093	0	1.5705	1.40041	1.37749	1.22169	0.530238	1.13911	0	0	1.06442	0.551931	0.919967	1.30082	0.555875	13.7899
INPP5B	Inpp5b	1 hr	0.800358	1.2764	0.405811	2.40502	1.21288	0.691103	0.952049	1.2243	0.426858	0.779425	0.634598	2.01176	0.501831	1.03445	0.721744	1.50561	0.787313	0.324466	1.17473	1.05069	1.10097	0.892472
INPP5D	Inpp5d	1 hr	1.26074	0.693962	1.94825	0.0381121	0.518157	0.482852	0.602804	1.07329	0.221623	0.84868	1.02586	2.2231	1.43577	3.38367	0.387273	0	2.61312	0.627953	2.32364	0.638168	0.933447	0.587929
INPPL1	Inppl1	1 hr	1.19896	0.438825	0.917111	1.15903	1.27684	0.811804	1.73164	1.35338	0.767865	0.942144	0.696104	1.24066	1.04109	1.60246	1.23062	1.71516	0.621829	0.957565	0.897021	0.779969	1.27425	0.590142
INSIG1	Insig1	1 hr	0.0901494	0.0540632	0.0341034	0.038862	0.760982	0.769178	0.248109	3.05873	0.269919	0.392322	0.599718	0.120948	0.520804	1.22521	0	1.75183	0.0305345	0.0420345	0.276132	0.597603	0.235023	0
INTS2	Ints2	1 hr	0.579135	0.177779	0.0594059	2.27557	0.850851	0.966737	1.00844	0	1.60264	0.860947	1.18578	4.00668	0.882749	1.82066	0.826708	1.06711	0.239233	0.445984	0.305663	0.0318978	0.577818	0
INTS5	Ints5	1 hr	0.780484	0	0.945231	0.210638	1.08191	1.74387	0.434153	0	1.54347	1.01853	0.94292	0.136684	1.62997	1.62436	1.28463	0	0.0379677	1.14035	0.0584373	0	0.072964	0
INTS6	Ints6	1 hr	0.497416	0.32031	0.432167	0.705629	0.998838	1.01548	0.65298	0.528039	0.58193	0.73594	1.09661	1.14788	0.820074	0.651944	0.962864	1.61056	1.42155	0.0522343	0.488751	0.623013	1.16476	0.648043
IP6K1	Ip6k1	1 hr	0	1.4528	1.86004	0.983495	1.05181	0.800508	0.381511	4.73761	0.482869	0.913868	0.94116	1.76271	1.15366	0.897098	1.11691	1.42617	0.73943	0.624672	0.81999	1.12719	4.56991	1.75375
IP6K2	Ip6k2	1 hr	0.183616	0.347283	0.934826	0.754643	1.23191	1.13653	1.60995	1.10262	0.544167	1.1961	0.834668	2.37722	0.928656	1.14516	0.218966	0.131751	0.200316	1.64187	1.04621	1.2552	0.654438	0.929769
IPCEF1	Ipcef1	1 hr	0	1.92911	1.31816	1.68198	0.104266	0.35496	0	0	0.0466551	0.33311	0.337726	0.196591	0.364993	0.302827	0	1.66124	0.332433	0.0742911	0.303997	0.230136	0.205209	0.0696133
IPMK	Ipmk	1 hr	3.19894	0.232407	0.4257	4.11619	1.36022	1.11314	2.40882	0	1.58448	0.667234	1.39999	2.77226	1.76864	0.339321	0	19.8759	0.933215	1.26667	0.17015	2.51704	2.58549	0
IPO11	Ipo11	1 hr	13.6439	1.42016	0.0423097	5.1995	0.547895	0.754195	0.857838	4.62603	1.81948	1.05446	1.42426	0.0678923	1.38687	0.653997	0	1.15958	0.092163	1.40311	0.809952	0.185146	0.0362421	2.8728
IPO13	Ipo13	1 hr	0.747406	1.40049	1.38259	0.49944	0.803151	1.11329	1.2231	0.97024	3.19018	0.832887	0.72936	1.36097	1.14529	0.883956	0.828576	1.01408	1.45974	0.0232332	0.444572	0.615679	0.38247	2.12788
IPO4	Ipo4	1 hr	1.99157	0.710007	1.13424	1.54954	0.99428	0.840639	1.1579	5.95941	0.743291	0.601631	0.604689	2.71857	0.552606	0.99052	0.209433	0.457063	0.29886	1.07559	1.29785	1.41655	0.433553	0.742339
IPO5	Ipo5	1 hr	0.657612	0.546736	0.317009	0.204351	1.21495	1.27757	0.618014	0.940585	2.39439	1.07338	1.23573	0.561315	1.9445	0.903672	1.41665	0.0868431	1.82801	0.816665	0.387957	0.576606	0.898301	1.06212
IQCG	Iqcg	1 hr	8.88936	0.658652	0.24572	0.702516	1.33672	1.02591	0.262204	0	0.534465	0.790104	0.997408	0.224626	1.26059	1.60465	0	0	0.52776	2.15812	1.54291	0.0565757	0.81888	0.862325
IQGAP1	Iqgap1	1 hr	0.450399	0.559198	0.183648	0.312989	0.546057	1.02187	0.457517	0.20346	0.356972	1.02187	1.257	0.610574	1.5364	0.802866	0.744737	1.50151	0.503804	1.14126	0.451202	0.23918	0.58013	0.255818
IQSEC2	Iqsec2	1 hr	0.155599	1.75206	5.13791	0.117723	1.06675	0.415927	0.712715	0	0.357342	0.796499	0.569715	1.32101	0.372303	1.68851	0.958082	0.449	0.902567	0.561053	0.431597	0.294425	0.461599	2.48194
IRAK1	Irak1	1 hr	0.305226	2.79269	0.17111	0.882805	1.19209	1.31898	2.22838	0	0.701057	1.47455	1.15253	0.61583	1.25838	1.96619	1.02254	0.409577	3.12911	0.206432	2.06432	1.02738	2.01639	1.95913
IRAK1BP1	Irak1bp1	1 hr	3.01055	0	0.180945	0.0802218	1.89012	1.10216	0	0	1.07141	1.36734	1.95296	0	0.753194	1.77736	0	5.40071	3.47271	2.52922	0	0.748737	0.0588294	0
IRAK3	Irak3	1 hr	1.07417	0.384517	0.584888	5.08095	0.360227	0.331721	0.829623	2.90776	0.782417	1.5223	1.41653	0.217145	2.39858	1.30195	1.52276	5.27838	1.45218	0.279382	0.047847	0.483695	0.305597	0.103668
IRAK4	Irak4	1 hr	0	0.781892	0.0858432	8.55556	1.46589	1.33353	1.22316	3.43098	0.565381	1.6232	1.75936	1.79827	1.23669	0.302354	1.19462	8.97082	0.0243152	0.193464	0.11037	0.484401	0.970281	1.8173
IRF1	Irf1	1 hr	0.662928	0.776469	1.31273	1.6251	0.417083	0.769572	0.51112	2.63636	0.446674	0.838913	1.57155	2.60685	1.21862	0.92279	1.18102	4.97259	2.33163	0.386677	1.74828	2.00658	4.47341	1.09826
IRF2	Irf2	1 hr	0.405726	0.235861	0.0129405	0.534872	0.931195	0.95906	0.637533	0	1.3427	0.79834	0.882539	0.0789368	1.11797	0.579905	0.521414	0	0.141051	2.42694	0.813351	0.726995	0.563255	0.201181
IRF2BP1	Irf2bp1	1 hr	0	0.13081	0.169887	0.0821918	1.12023	1.74511	0.344362	0	1.6365	1.46808	1.03107	0.909247	2.22156	2.81232	0	0	0.693126	0.0878792	2.5973	3.59332	3.78394	2.49584
IRF3	Irf3	1 hr	0.248272	0.861906	1.57721	4.84732	1.34397	2.26137	3.79608	2.20791	0.813927	2.92713	1.74221	1.75849	2.2353	3.8803	3.53771	0.196222	0.295703	1.33512	2.88917	4.28621	2.12588	4.08208
IRF7	Irf7	1 hr	7.43159	1.11074	5.26459	0.463476	0	5.08152	0	0	1.85536	1.93091	2.5651	4.91953	0	5.93583	0	0	3.13681	0	5.64089	9.96109	6.85406	13.6362
IRF8	Irf8	1 hr	0.317093	0.143547	0.702637	0.300987	1.07308	2.27924	1.60781	0	0.331991	1.17516	0.810952	5.69982	4.697	6.53755	1.33622	0.504731	1.56875	2.38957	2.00825	1.55466	0.143145	0
IRF9	Irf9	1 hr	4.73177	0.591184	1.24172	1.22826	0.918431	1.11675	1.74305	0.810608	0.611827	1.55238	1.39046	0.376091	0.414059	1.209	0.772916	0	1.22209	0.39959	2.5167	1.26365	0.869496	0.907004
IRGM	Irgm1	1 hr	1.08544	0.386376	0.587593	2.68479	0	0.107694	0	13.4759	0	0.0982471	0.745355	0.864385	2.12837	0.153039	0	0	0	1.42931	0	0.382597	1.67965	0
IRX3	Irx3	1 hr	0.208714	2.9485	1.53295	7.86857	0.582013	1.75836	0.913305	2.15035	0.947759	1.99106	3.47512	1.0115	2.15088	2.34475	0.515622	3.01701	0.436642	3.00495	7.75236	14.6294	0.235615	5.42364
IRX5	Irx5	1 hr	2.44949	1.04703	0.0643945	2.00996	0.733298	0.949194	2.25905	0	1.09171	0.682881	2.03991	3.25167	0.983388	0.786461	0	0	0.105327	0.301256	2.20813	3.78355	0.0846113	2.14523
ISG20	Isg20	1 hr	0.714638	0.105633	0.160645	0.734009	0	0.996155	1.4941	0	0.295721	0.706632	0.134301	0.236319	0.485551	3.00551	0	1.27793	1.11522	1.46569	1.11806	0	1.01992	0
ISOC2	Isoc2a	1 hr	0.407543	0.119102	0.292167	0.796585	1.08901	0.792345	0.168953	6.23135	1.64392	0.498251	0.417308	2.39335	0.372468	0.719882	1.38143	0.666048	0.423347	1.09929	1.2816	0.783095	0.22844	0.299619
IST1	Ist1	1 hr	0.676953	0.453972	0.566088	0.3417	1.06688	0.998176	0.777736	0	0.960544	0.905131	1.00591	0.0925764	1.13894	1.29756	0.605283	0.310555	0.232985	0.7326	0.616694	0.62283	0.516185	0.141854
ISYNA1	Isyna1	1 hr	1.88041	0.600046	0.300583	0.753093	0.585749	0.736299	1.21473	1.87085	0.264065	0.843354	0.646813	1.12206	0.746117	0.851881	1.10949	0.897184	1.48155	2.62325	0.472061	0.981846	0.287147	1.61669
ITCH	Itch	1 hr	0.21782	0.816397	1.39991	0.524541	0.968209	1.13776	1.03644	0.827747	0.945799	1.05666	1.37241	0.449827	1.51742	0.795985	0.710437	0.191636	0.48907	0.550047	0.656393	0.581906	0.45489	0.158326
ITFG1	Itfg1	1 hr	0	0.694896	0.0146653	0.388573	1.26576	1.38951	0.663065	0.568081	1.07614	0.745713	1.44175	1.11331	1.34	0.546424	0.343554	1.76779	0.00960634	0.648229	0.535908	0.130226	0.260849	0.0642886
ITGA3	Itga3	1 hr	0.478031	1.14017	1.49369	1.28406	0.609691	1.72866	1.36375	1.90755	0.0952024	1.43356	1.3019	0.569055	2.50786	1.68575	0.473903	0.104582	0.626572	0.822625	0.783088	0.664295	1.35286	0.937034
ITGA4	Itga4	1 hr	0.710273	0.280165	0.049219	0.671206	0.111939	0.426759	0.189381	0	0.103222	0.501332	0.621403	0.500322	2.0082	1.0994	0.468484	0.497345	1.97987	0.483473	0.928038	0.198736	0.702088	0.328109
[truncated: 2,887 more rows]

## Sheet: time4_hr
HGNC.symbol	X	Time Point	Subject 1	Subject 2	Subject 3	Subject 4	Subject 5	Subject 6	Subject 7	Subject 8	Subject 9	Subject 10	Subject 11	Subject 12	Subject 13	Subject 14	Subject 15	Subject 16	Subject 17	Subject 18	Subject 19	Subject 20	Subject 21	Subject 22
A2M	A2m	4 hr	0.072275	0.0558089	0.0959165	0.135514	0.408474	0.214712	0.173491	0.400248	0.187551	1.19601	0.994049	0.302224	0.615808	0.26157	0.565367	0.372912	0.46001	1.22333	0.183739	0.115109	0.180858	0.0478792
AAAS	Aaas	4 hr	1.06177	0.270815	0.802441	0.550347	1.50523	1.19351	1.39707	1.69908	0.79313	0.779163	0.416326	2.59998	0.478632	1.02175	0.385421	0	0.427718	0.301918	0.821955	1.42272	0.134714	0.230995
AADAT	Aadat	4 hr	0	3.1967	0.0909704	1.16321	1.58046	1.08437	3.50842	0	1.70418	1.03524	1.0874	1.43673	2.61388	0.958221	0	1.20202	0.340836	0.110984	2.26334	0	4.35323	1.41429
AAGAB	Aagab	4 hr	1.49835	0.0982999	1.21663	0.3986	0.924559	1.31403	0.812887	1.20679	0.78672	1.0019	1.25083	0.103379	1.40937	0.748146	0.388571	1.09969	1.62005	1.02864	0.204122	0.391849	0.144975	0.874605
AAK1	Aak1	4 hr	0.604593	0.708455	0.487946	0.695695	1.18779	0.909541	0.72059	0	0.354318	0.854819	0.900136	0.874555	0.861482	0.963312	0.802804	0.181735	0.174856	0.425648	0.555355	0.491602	0.418191	0.394234
AAMDC	Aamdc	4 hr	1.63437	0.0765749	0.453519	1.76251	0.466411	0.682471	0.339044	3.42396	9.03017	0.685307	0.620076	0.414587	1.45234	0.120921	1.60782	2.11006	0	0.0471825	0.0825049	1.36056	0	0
AAMP	Aamp	4 hr	0.455393	0.75654	1.51945	0.389243	1.83297	1.6042	0.980987	0	1.21469	1.11756	0.905845	1.09388	1.2848	0.911365	1.21701	0.783427	0.107505	1.81307	1.50066	1.31183	0.843568	0.274794
AARS2	Aars2	4 hr	1.85416	0.150761	5.97969	1.17514	0.69008	1.0745	1.33187	0.598748	0.539001	0.913477	0.507337	1.18532	0.778309	1.18039	1.4314	0.491505	0.0335732	0.491505	1.12629	1.31675	0.936151	1.17816
AASDHPPT	Aasdhppt	4 hr	0	0.479687	1.21246	0.223754	1.29822	0.854306	0.69461	0	2.81855	1.35854	1.15215	0.47804	0.57308	0.882444	1.20857	0	0.30248	0.18065	0.910731	0.107013	1.07432	0.169275
ABCA2	Abca2	4 hr	1.14426	1.00625	1.20964	1.00314	0.693267	0.983407	0.831799	0.287836	0.342875	0.831799	0.619796	0.507991	0.320583	1.10679	0.358946	0.134904	1.01031	1.23786	1.32994	0.88511	0.701043	1.05449
ABCA3	Abca3	4 hr	3.90557	0.964267	2.48751	0.476951	0.497266	0.610033	0.719128	1.11174	0.364658	0.737074	0.4625	0.664817	0.762008	0.473457	0.712495	0.148481	1.31832	0.790615	1.30269	0.221448	1.07034	0.656644
ABCB8	Abcb8	4 hr	2.07563	2.2171	1.95204	2.40886	0.849912	0.611266	1.82927	1.13463	0.504591	0.724988	0.510081	0.698282	0.954435	0.818681	0.553774	0.676398	0.891973	0.256227	0.93218	0.224403	1.46088	0.730107
ABCB9	Abcb9	4 hr	12.1085	0.262325	11.06	1.04562	0.465416	1.0585	1.31089	0	0.166299	0.868653	0.604857	2.14422	0	1.8624	1.05813	8.02649	2.656	1.75276	0.591979	1.11295	3.4713	0
ABCC10	Abcc10	4 hr	0.867006	1.25685	2.41466	1.63728	1.61227	1.17958	1.93804	2.30496	0.360899	1.28542	0.996003	1.58124	1.50651	2.42076	1.0617	5.42552	1.02372	1.1091	1.61428	2.08873	0.0770432	1.54719
ABCC2	Abcc2	4 hr	0.388967	0.563974	0.0282231	0.450198	1.32569	0.0395916	1.62191	0.641451	0.0661079	0.0458397	0.0590369	0.2064	0.190399	0.101128	0	0.575556	0.587931	0.188296	0.0636696	0.0123438	0.068729	0.0710759
ABCC3	Abcc3	4 hr	0.952838	2.28113	1.3305	0.837484	2.74448	1.37809	4.57476	0.9894	0.0183574	1.21717	1.62857	1.62578	1.08269	1.90378	0.159762	0.135091	0.725378	0.392677	0.949344	0.958998	0.140638	0.653818
ABCC5	Abcc5	4 hr	1.06483	1.68975	1.2215	0.912631	0.680136	2.2513	1.03801	0.514072	0.962021	1.30108	1.41885	0.718522	1.10331	1.35644	0.566374	0.0749974	0.661322	0.327987	0.720203	0.994893	0.154515	0.38346
ABCD1	Abcd1	4 hr	1.52924	3.36931	1.83396	0.338448	0.919356	1.19577	2.6408	12.6038	2.34378	1.20574	1.13759	2.74018	0.72489	1.23335	3.33784	0	0.17228	0.0719909	1.11812	2.41849	0.0500314	1.67005
ABCD3	Abcd3	4 hr	0	0.0548109	0.0280596	0.0132629	1.72806	1.11634	0.685249	0	0.855366	0.836735	0.939049	1.58573	0.596965	0.43366	0.385977	0.113095	0.0737579	0.474216	0.425315	0.380158	1.52198	0.0510215
ABCD4	Abcd4	4 hr	0	0.692895	0.906365	0.199133	1.85446	1.07903	1.75328	1.18486	0.556692	1.06756	1.14236	1.96245	1.384	1.1737	1.47709	1.23591	0.0654389	0.412296	1.20709	1.70853	0.564219	0.829661
ABCE1	Abce1	4 hr	1.75241	0.287176	1.29167	0.57909	0.915034	0.711728	0.360407	0.859743	1.13426	0.815245	1.49754	0.0321501	1.16136	0.522011	0.302164	0.759487	1.3896	0.336721	0.12495	0.710718	0.794821	0.0878303
ABCF1	Abcf1	4 hr	5.50005	2.71407	1.23337	2.85719	0	1.74406	0	0	1.80583	1.24781	0.9119	0	0	1.28891	0	0	2.27319	0	1.85565	2.46398	1.31032	1.31235
ABCF2	Abcf2	4 hr	0.809291	0.768514	0.678677	0.944711	0.381191	0.881878	0.453455	0.581954	1.10079	0.592964	0.557208	0.305017	0.445996	0.994023	0.5382	1.2045	0.32259	1.00891	1.01762	1.41825	0.592713	1.04452
ABCF3	Abcf3	4 hr	0.224241	0.583265	0.2194	0.676117	1.73823	1.37512	1.21758	1.32307	1.90935	1.2309	0.811089	1.84912	1.45967	0.911611	2.04633	0.416295	0.95348	1.10618	1.24895	0.716666	0.288489	1.40863
ABHD10	Abhd10	4 hr	2.34837	0.224209	0.0123011	2.04338	0.911432	0.537723	0.153928	0	1.46031	0.546252	0.787436	0.771937	0.693538	1.25709	0	0	0.0258324	0.862063	0.0665081	1.54371	0.0278006	1.32877
ABHD11	Abhd11	4 hr	0.287613	2.23242	0.0273917	0.210733	1.02701	0.971492	2.40499	2.42508	0.650462	0.80842	0.946292	0.293639	1.97366	0.994867	0	0.751446	0.077062	0.86996	0.381475	1.41012	0.608826	1.12726
ABHD12	Abhd12	4 hr	2.62538	1.53591	3.31892	1.6741	1.15875	1.52149	0.746106	0.556456	0.293607	0.930211	1.05975	0.564367	0.876532	0.884887	0.287692	1.37694	0.357489	0.255381	1.58804	1.44814	1.04304	1.09494
ABHD14A	Abhd14a	4 hr	0	0.650273	0	0	0.790569	0.875448	0	0	2.95674	0.411769	0.403352	0	0	0	0	0	0.0455963	0	0	4.27553	0.348636	0.793375
ABHD14B	Abhd14b	4 hr	1.25599	0.0420412	0.0154185	0	2.07276	0.846991	0.70843	0	0.507475	0.694862	0.665875	0.328312	0.461836	0.258517	1.70765	0.291924	0.55517	2.20557	0.326359	0.172688	0.231792	0
ABHD16A	Abhd16a	4 hr	0.160069	0.75223	0.412846	3.65013	0	2.53599	0	0	2.01377	2.19614	2.15929	0	0	2.3893	0	0	2.54186	0	3.43514	3.03356	2.21444	4.70396
ABHD17A	Abhd17a	4 hr	0.332996	1.9577	0.588136	2.24604	0.90664	0.860128	1.78581	1.26828	2.63785	1.34142	1.06539	1.89164	0.539602	1.32036	5.02966	13.6825	0.814796	0.446579	2.94237	0.889282	0.882204	4.15993
ABHD17C	Abhd17c	4 hr	0.45611	0.660853	5.83561	0	0.417305	1.39179	0	0	0	0.730066	0.635659	0	1.42973	0.630156	0	0	0.0333033	0.438156	0.234861	0.117286	0.0382264	0
ABHD4	Abhd4	4 hr	0	0.92871	0	0.0337087	0.576832	1.12317	0.34626	6.38333	0.847075	1.03385	1.57949	1.38779	2.47576	0.269097	0.446125	2.46544	0.328259	0.0775071	0.566284	0.0464355	0.114426	0.129675
ABHD6	Abhd6	4 hr	0	0.0694532	0.624046	0.302728	1.785	0.467195	1.16844	0	0.465001	0.46939	0.205261	0.41233	0.229919	0.828404	1.49763	0.884689	0	0.501664	0.558853	0.145748	0.0917867	0.30105
ABHD8	Abhd8	4 hr	2.39124	0.19045	0.143722	0	0.157174	0.597546	1.26129	0	1.68396	0.705514	0.665513	0	0	0.718966	0	1.92609	0.198946	0.792598	0.929594	0.594714	0	0
ABI2	Abi2	4 hr	0.114765	0.110784	0.0634022	0.789711	1.13012	1.11172	0.785779	3.172	0.499693	1.32795	1.73186	0.19812	0.478429	1.20935	1.18284	0.332691	0.525762	0.390899	0.710531	0.295893	0.758593	0
ABI3BP	Abi3bp	4 hr	0.665962	0	0.0540697	0.538959	1.39399	0.516183	0.309727	1.56185	1.23639	1.77969	1.63939	0.430819	0.549912	0.473588	2.04152	0	0.28643	0.991336	0.0278172	0	0.889716	0.0983165
ABL1	Abl1	4 hr	0.404854	1.15761	0.160166	2.57899	1.2576	1.28938	1.57412	1.15585	0.603057	1.31479	1.41224	1.47545	1.90297	1.534	1.01729	3.07181	1.29369	0.583012	1.5611	1.92815	4.58878	2.31823
ABL2	Abl2	4 hr	0.290525	2.19977	0.188275	2.48956	1.07035	0.835231	0.556485	1.29286	0.647139	1.1082	1.53008	0.938764	1.24524	1.13135	0.754339	0.760205	0.466472	0.587237	0.95838	0.658276	0.299233	1.0786
ABLIM2	Ablim2	4 hr	0.322261	1.50116	4.65302	1.28073	0.391512	0.392193	1.85546	2.55887	6.25247	1.77544	0.299223	0.219203	0.421366	1.21925	0	0.517608	1.47635	1.74667	0.432817	0.153906	0.242377	3.05453
ABR	Abr	4 hr	2.17031	2.63144	1.16911	1.49052	0	1.40646	0	0	1.60227	2.66804	1.67003	0	0.367018	3.00373	0	0	3.09169	0.0877803	3.01319	1.56978	2.23158	1.82865
ABT1	Abt1	4 hr	3.74696	0.0356295	3.73019	0.483722	1.59788	1.23236	0.304317	0	1.80327	0.904988	1.45075	0.383541	0.623725	0.662289	0	3.60863	1.20008	0.133296	0.490429	0.960319	0.29803	0
ABTB1	Abtb1	4 hr	1.70868	0.538761	0.494094	0.960285	1.64409	0.772725	2.67817	2.42938	0.569629	1.7185	1.04676	2.89373	1.15991	1.91127	1.62773	2.50093	2.19675	0.929723	1.23943	3.0121	0.469052	2.8554
ABTB2	Abtb2	4 hr	2.17541	1.51233	1.68547	0.0707002	0.494963	1.06412	0.89913	0.678269	0.666077	0.744313	0.374454	0.798165	0.546793	0.771759	0.428	1.4594	0.853671	0.0926944	0.3728	0.740575	1.95424	0.602973
ACAA1	Acaa1b	4 hr	0.0175629	0.19278	0.186625	0.10015	2.75266	0.361533	0.960164	0	0.286723	0.344356	0.301067	1.51242	0.379817	0.361275	0.668085	0.221699	0.16968	0.207355	0.350614	0.332845	0.0056912	0.221339
ACAA2	Acaa2	4 hr	0	0.524851	0.0421016	0.0916177	1.77707	0.612342	0.624367	0	1.13033	0.469984	0.679331	0.419984	0.439262	0.257703	0.499319	0	0.328109	0.215085	0.120309	0.367502	0.00425529	0.0364601
ACACA	Acaca	4 hr	1.89404	2.168	0.797768	2.1505	0.0931145	1.2483	0	0.297951	0.890803	1.03071	1.2483	0	0.037135	1.14667	0	1.1905	1.96407	0	0.708098	1.6643	0.0395103	0.887082
ACACB	Acacb	4 hr	0.2135	0.310599	0.746416	1.64061	0.914843	0.756104	0.917757	0.08322	0.865588	0.583543	0.421748	1.96812	0.388559	0.621567	0.675524	0.599059	0.787155	0.695449	0.60905	0.62275	0.274675	0.816078
ACAD10	Acad12	4 hr	4.07078	0.974638	1.58011	0.659796	1.56087	1.38555	1.19043	0.415047	0.54983	0.687535	0.947064	0.469037	0.714668	0.575805	0	0	1.18525	0.628912	0.807152	0.504718	0.996642	1.10528
ACAD11	Acad11	4 hr	0	0	0	0	2.26557	0.806767	2.29424	0	1.91063	0.821597	1.11326	0.204658	3.03427	0.781061	1.17456	0	0	0	0.578381	0	0	0
ACAD9	Acad9	4 hr	0.037659	1.14705	0.308174	0.245115	1.15147	1.3528	1.72348	0.787691	1.23027	1.13049	1.04639	0.373939	0.555222	1.01088	0.886422	0.42717	0.208615	0.123634	0.726123	1.03943	1.08742	0.407347
ACADL	Acadl	4 hr	0.642314	0.662472	0.124184	0.422092	1.93911	0.581363	0.807385	0	0.562345	0.706878	0.742536	0.979778	0.621585	1.03769	0	0	0.229635	0.722567	0.354865	0.107353	1.25601	0.586973
ACADM	Acadm	4 hr	0.0274216	0.128866	0.0103736	0.11427	2.53171	1.06711	0.341403	0.979659	3.15976	0.4067	0.428694	0.988023	0.495037	0.231636	0.495358	0.140405	0.0812597	0.191549	0.267622	0.0162841	0.347756	0.248202
ACADS	Acads	4 hr	4.50415	1.73715	0.291848	0	1.67609	1.19377	1.84948	0	2.86539	0.39173	0.340296	4.88028	0.531266	0.57623	0	1.58766	0.212042	3.76233	0.435698	1.77249	0.117967	0.386918
ACADSB	Acadsb	4 hr	0	0.00543222	0.105799	0.00665169	2.62657	0.456934	0.111601	0	1.46138	0.283695	0.304648	0.515506	0.36418	0.133921	0.962241	0.728065	0.0207681	0.370832	0.159973	0.0620825	0.319614	0
ACADVL	Acadvl	4 hr	0.0230532	1.15747	0.714402	0.980342	1.40254	0.974128	2.17512	0.796083	0.910579	0.72696	0.809754	0.886654	0.789608	1.08716	0.531902	0.22769	0.474618	0.155943	1.06877	1.01311	0.312679	0.886654
ACAP2	Acap2	4 hr	0	0.644165	0.313664	0.406634	1.28984	0.960512	0.77414	1.53863	0.728391	1.17277	1.39065	0.84772	1.44774	1.32105	0.746656	6.86213	0.36201	1.8909	0.859882	0.84772	0.119112	0.157113
ACAP3	Acap3	4 hr	0.315026	0.858083	1.71353	0.49571	1.26386	0.9848	3.5528	4.2157	0.544545	0.99581	0.585309	1.20026	1.62292	1.94922	1.45987	3.32726	0.827882	2.3733	1.80941	2.33506	0.295016	2.34767
ACAT2	Acat2	4 hr	2.59095	0.4261	0.243859	0.119129	0.812427	0.559232	0.5639	0	0.576224	0.456909	0.523195	0	0.367469	0.0707676	0	0	0.186349	0.0593776	0.0974689	0	0.186349	1.37745
ACBD4	Acbd4	4 hr	1.36526	0.757725	2.66355	1.73212	1.12924	0.405323	1.71399	1.59834	0.332393	0.571846	0.46045	1.13928	0.460041	1.08432	0.477518	4.70299	0.0815056	0.216423	0.58867	0.30536	0.835882	0.504142
ACBD5	Acbd5	4 hr	1.57453	1.11938	0.513104	0.281159	1.2586	1.22724	0.893324	0.769878	1.78817	0.864632	0.690958	0.150049	0.80237	0.536349	0	0.125537	0.493532	0.782672	1.32447	1.59568	0.371289	0.702232
ACBD6	Acbd6	4 hr	0	0.180069	0.0320369	0.797845	0.847557	1.16169	1.27721	2.95576	1.29244	1.09793	1.45981	0.534369	0.553544	1.88142	2.52965	0.557963	0.569641	0.176676	0.871546	0.722172	1.99931	1.58149
ACCS	Accs	4 hr	0.572846	0.709023	0.214254	0.0219248	1.26932	0.869683	1.29076	1.07139	0.33143	1.51342	1.02425	3.10528	0.562492	1.32925	1.34338	2.14363	0.121561	0	1.40928	1.57432	0.274669	1.1988
ACD	Acd	4 hr	0.869971	4.4989	3.60353	0.108194	0.439769	1.31452	1.31121	4.88714	0.833538	0.947988	0.807777	5.48295	1.3723	0.92554	4.32851	2.09838	0.367272	1.59568	2.44946	5.86531	0.124755	2.27171
ACIN1	Acin1	4 hr	1.02561	1.68137	1.3173	4.07502	0.809758	1.44848	1.01175	0.479316	0.545504	1.38012	0.982225	0.736293	0.953451	2.05001	0.904028	1.28471	0.990175	0.670585	1.48874	1.76471	0.712538	1.84085
ACLY	Acly	4 hr	0.112715	0.407758	0.51377	0.346791	0.988503	0.874152	1.15209	0.226269	0.243886	0.681954	0.754427	0.400298	1.02028	0.546736	0.119501	0.180876	0.841554	1.22262	0.473118	0.474978	0.806605	0.0741898
ACMSD	Acmsd	4 hr	0	0.27859	1.01507	0.292979	3.19896	0.419015	1.66016	1.15225	0	0.283562	0.227738	2.21591	0.14826	0.777083	0	0	0.0174024	0.0360856	0.543016	0.0164231	0.0255386	0.926247
ACO1	Aco1	4 hr	0.307588	0.730015	0.0328758	0.970743	1.22912	0.506278	0.476121	0.979176	0.514132	0.341546	0.495957	0.788391	0.415605	0.131982	0.281761	0.252082	0.302679	0.131252	0.23733	0.0941216	0.199672	0.185701
ACO2	Aco2	4 hr	0.0275172	0.17921	0.231627	0.0326558	1.52538	0.874285	0.784993	0.122491	1.72222	0.417855	0.300907	0.768575	0.323341	0.514444	0.504487	0.64373	0.0398693	0.283792	0.322367	0.221948	0.251666	0.522479
ACOT1	Acot3	4 hr	0	0.0948387	0	0.964516	1.70581	1.18839	0	0	2.64387	0.25871	0.0980645	0.590323	3.25613	0	0	0	0	0	0.206452	0.140645	0.45871	0.729677
ACOT12	Acot12	4 hr	2.24319	0.62191	0.376644	0.119582	0.808198	0.507615	0.295295	0	0.438876	0	0.0703665	0.963574	0.381525	1.28165	1.16979	0	2.93628	5.63705	0.475889	0.08867	0.202151	0
ACOT13	Acot13	4 hr	0	1.03342	0	0.296484	2.17877	0.668185	0.545711	0	2.23553	0.43951	0.425114	2.23699	0.257885	0.448795	0.811524	0	0.00678096	0.792746	0.634802	0.0745905	0.611538	0
ACOT4	Acot4	4 hr	0	0.581761	0	0	4.51244	0.123273	1.42196	0	0.963475	0.562297	0.335216	0	0.45957	0.507149	0	0	0.24979	0	0	0.235732	0.142737	0
ACOT7	Acot7	4 hr	0	0.726314	1.0108	0.239318	1.21119	0.189533	0.0905864	0	0.0563982	0.326785	0.145862	1.85902	0.294219	0.333273	0.404894	2.19591	0.972245	1.06757	0.200763	0.861195	1.07918	0.14112
ACOT8	Acot8	4 hr	3.42505	0.467747	2.64135	2.79118	1.37165	0.830838	3.12095	0	2.08006	0.526	0.884647	0.788382	0.175745	1.10334	0.960425	0	0.0283857	2.1119	0.0436893	0.0999671	1.13271	0.279167
ACOX1	Acox1	4 hr	2.10885	5.28623	9.66132	0.876902	2.11387	0.767063	3.31097	1.63222	0.96319	0.540081	0.607869	6.5519	0.702621	0.48482	1.19072	1.73653	4.60416	4.19692	3.14085	4.58828	25.7509	6.15224
ACOX2	Acox2	4 hr	0.120857	0.0162678	0.100216	0.088552	1.36695	0.235116	0.931715	4.32554	0.796815	0.364721	0.212479	0.245091	0.0600834	0.366332	0.902555	0.192374	0.0177257	0.583108	0.0135821	0.286912	0.211174	0
ACOX3	Acox3	4 hr	1.53407	1.50809	0.514693	0.0313032	0.923552	1.10488	0.678343	0	0.824744	0.904706	0.989033	2.39214	1.01885	1.14363	1.61489	0.551959	0.575064	0.910988	0.708688	0.561861	2.09678	0.248296
ACP2	Acp2	4 hr	1.48813	0.117714	0.288762	0.360889	1.27162	1.38654	1.48127	1.81143	0.626921	0.837968	0.869079	4.46362	1.91213	1.20279	1.61803	0.594794	0.363556	0.387048	0.549714	0.773968	0.12673	0.143619
ACP5	Acp5	4 hr	0.973749	0.0826435	0.63104	0.597399	1.04472	0.101384	1.47529	0	0	0.195549	0.195856	0.140555	0.758385	0.360528	0	2.10034	0.0648245	0.0488488	0.0271894	0.351926	0.153305	0.557613
ACP6	Acp6	4 hr	0.272999	0.211243	0.0207236	1.20805	1.26166	0.814439	3.1913	0	0.690926	0.775064	0.580676	0.327295	0.581091	0.638426	1.32106	1.51738	1.83211	0.477196	0.362802	0.0987827	1.19493	0.322184
ACR	Acr	4 hr	16.9355	0.984893	2.06264	24.7284	0	0	0	0	0.888725	0.779293	0.321665	0	2.15217	0	0	11.58	0.766028	2.24171	3.87988	0.722918	0	0
ACRBP	Acrbp	4 hr	0.891627	3.05507	0.349258	3.81355	0.237239	0.718129	0	10.8157	0.385466	0.444305	0.324365	0.156148	0	0.299472	1.34913	30.1648	3.83882	0.180664	3.76226	1.41023	0.850515	1.36912
ACSF2	Acsf2	4 hr	0.41855	0.252594	0.296314	0.174113	2.09156	0.084811	0.946748	0.130499	0.195095	0.0838445	0.0588903	0.932744	0.158235	0.324097	0.0458651	1.16288	0.0776678	0.0218776	0.166876	0.212717	0.0934984	0.130688
ACSF3	Acsf3	4 hr	0.802713	0.286466	1.51783	0.0308051	1.34065	0.9603	1.16797	0	0.658641	1.20611	0.733663	5.36919	1.59746	1.93255	1.57242	0.297573	1.25986	1.10144	1.42657	2.13068	2.65479	0.380348
[truncated: 7,402 more rows]

## Sheet: time16_hr
HGNC.symbol	X	Time Point	Subject 1	Subject 2	Subject 3	Subject 4	Subject 5	Subject 6	Subject 7	Subject 8	Subject 9	Subject 10	Subject 11	Subject 12	Subject 13	Subject 14	Subject 15	Subject 16	Subject 17	Subject 18	Subject 19	Subject 20	Subject 21	Subject 22
[truncated: 8,883 more rows]

[truncated: 3 more sheets: time27_hr, time36_hr, time48_hr]
